# Supplementary material for: The ceRNA Crosstalk between mRNAs and lncRNAs in Diabetes Myocardial Infarction
Source: Hindawi journal article supplement (doi:10.1155/2022/4283534), 2022-05-09
Supplement: f1 [file 4283534.f1.pdf]

| Probe_Set_ID | pvalues    | foldchange | C037dup_NS | C065_NS    | C039_NS    | C172_NS    |
|--------------|------------|------------|------------|------------|------------|------------|
| ILMN_1656233 | 0.02067925 | 0.76199224 | 13.7036841 | 13.0411745 | 13.0510934 | 13.5524037 |
| ILMN_1657996 | 0.01228782 | 0.67051593 | 7.43785692 | 7.34683814 | 7.47090611 | 8.30702271 |
| ILMN_1660357 | 0.00584948 | 0.77720835 | 7.26775395 | 7.09902899 | 7.31435484 | 7.22266258 |
| ILMN_1661461 | 0.03976483 | 0.68392708 | 7.44159054 | 7.10474446 | 7.43366639 | 7.28064644 |
| ILMN_1676480 | 0.02162666 | 0.61039278 | 7.23192387 | 6.45502385 | 6.97131247 | 6.91709515 |
| ILMN_1683250 | 0.04801097 | 0.68730819 | 8.62550977 | 7.49188195 | 7.26785318 | 7.97275353 |
| ILMN_1693740 | 0.03252467 | 0.71305284 | 7.61514553 | 6.63606817 | 6.60157886 | 7.44597825 |
| ILMN_1723320 | 0.0428202  | 0.85177271 | 6.51793562 | 6.25826432 | 6.40240533 | 6.03845396 |
| ILMN_1729421 | 0.01202769 | 0.63930722 | 7.68633874 | 6.64663359 | 6.93139822 | 7.44336961 |
| ILMN_1745931 | 0.01211735 | 0.84047449 | 6.5670921  | 6.50545018 | 6.58701538 | 6.45780636 |
| ILMN_1775444 | 0.0106002  | 0.68187302 | 7.64737568 | 7.27598292 | 7.24616293 | 7.51524962 |
| ILMN_1790412 | 0.02851932 | 0.71899209 | 8.96304171 | 7.61597312 | 8.27021122 | 8.04716809 |
| ILMN_1805064 | 0.04246256 | 0.74537749 | 7.18331679 | 7.83866945 | 7.68779627 | 7.30602066 |
| ILMN_1824139 | 0.00428839 | 0.67076339 | 7.71141713 | 7.38400058 | 7.38833594 | 7.46585124 |
| ILMN_1859584 | 0.02593932 | 0.69738358 | 7.18638368 | 7.49227302 | 6.72933116 | 7.47230174 |
| ILMN_1871457 | 0.02965886 | 0.79713812 | 7.8366898  | 7.11647289 | 7.28801243 | 7.13889432 |
| ILMN_1872261 | 0.00999095 | 0.6856316  | 7.31914913 | 6.84113281 | 7.70162599 | 7.58450332 |
| ILMN_1880280 | 0.03697789 | 0.72634022 | 7.05665397 | 7.74490042 | 8.05174187 | 7.90382884 |
| ILMN_1882711 | 0.04294172 | 0.84968705 | 6.32027472 | 5.91176348 | 5.92304694 | 5.58340896 |
| ILMN_1883279 | 0.01724662 | 0.75453837 | 7.4066251  | 6.44986936 | 6.49701192 | 6.47549237 |
| ILMN_1893633 | 0.02324721 | 0.68083968 | 10.3882778 | 7.56405801 | 7.54147612 | 7.36834494 |
| ILMN_1906626 | 0.02112377 | 0.74175133 | 6.14869601 | 5.88647113 | 6.20757742 | 6.08286201 |
| ILMN_1907042 | 0.03927828 | 0.68218712 | 8.89345899 | 7.58878358 | 7.9369759  | 8.08806419 |
| ILMN_1343293 | 0.00750878 | 0.66242    | 12.3508113 | 11.5458622 | 12.0386094 | 12.7061349 |
| ILMN_1651228 | 0.03776029 | 0.66225561 | 14.1056467 | 11.2697964 | 11.75231   | 10.7298213 |
| ILMN_1651498 | 0.02549122 | 0.78438022 | 6.59430714 | 6.18458836 | 6.04371546 | 6.15202153 |
| ILMN_1651850 | 0.03282375 | 0.7767501  | 14.7832254 | 13.3997719 | 13.8235971 | 13.556233  |
| ILMN_1651964 | 0.04852667 | 0.71739939 | 9.0101826  | 7.70146103 | 8.06361134 | 8.18855473 |
| ILMN_1652003 | 0.04791611 | 0.62799015 | 8.40382712 | 6.79568904 | 7.39130976 | 7.56933387 |
| ILMN_1652128 | 0.02817528 | 0.61236662 | 10.837944  | 9.04808848 | 9.91694189 | 9.29708019 |
| ILMN_1652230 | 0.04509359 | 0.76359332 | 15.0209387 | 13.5785142 | 14.2323025 | 13.4932225 |
| ILMN_1652631 | 0.02670336 | 0.77529925 | 13.1149118 | 12.331675  | 12.5771855 | 12.9421941 |
| ILMN_1652736 | 0.02924844 | 0.78563991 | 6.67141086 | 6.1041173  | 6.24870864 | 6.19892509 |
| ILMN_1653412 | 0.01434316 | 0.68862792 | 8.36079881 | 8.36456193 | 7.96140107 | 8.68841958 |
| ILMN_1653567 | 0.02585267 | 0.82025215 | 5.91685709 | 5.79004451 | 5.64227991 | 5.38906736 |
| ILMN_1653871 | 0.03086367 | 0.63611829 | 12.104775  | 11.0471907 | 12.4754039 | 13.1240622 |
| ILMN_1654320 | 0.02303977 | 0.64999991 | 9.99473669 | 9.22478361 | 8.96419269 | 9.46728356 |
| ILMN_1654516 | 0.03216181 | 0.70498793 | 9.86409528 | 8.44437263 | 9.1849388  | 9.21667069 |
| ILMN_1656057 | 0.0347521  | 0.79740085 | 6.72905783 | 6.08320379 | 6.4875579  | 6.08351592 |
| ILMN_1656393 | 0.04451557 | 0.77687322 | 7.29273943 | 7.25941562 | 6.88684397 | 7.15061959 |
| ILMN_1656676 | 0.02964941 | 0.62291349 | 10.210664  | 8.61307411 | 9.4863765  | 9.51077801 |
| ILMN_1656961 | 0.00776051 | 0.69043306 | 8.85311084 | 8.21329916 | 8.40966333 | 8.24648742 |
| ILMN_1657317 | 0.00602072 | 0.73106502 | 7.37486995 | 6.7106136  | 6.9742597  | 6.71784775 |
| ILMN_1657398 | 0.00077359 | 0.60388716 | 7.24446945 | 7.61500939 | 7.6547291  | 7.74330895 |
| ILMN_1657497 | 0.01952165 | 0.78023424 | 6.6960286  | 6.32854497 | 6.58704194 | 6.38050782 |
| ILMN_1657515 | 0.01974223 | 0.59706498 | 9.53176723 | 8.90733686 | 9.4100557  | 8.81252454 |
| ILMN_1658798 | 0.00670908 | 0.69646692 | 7.00671206 | 7.02054332 | 7.67780631 | 7.38454461 |

|              |            |            |            |            |            |            |
|--------------|------------|------------|------------|------------|------------|------------|
| ILMN_1658921 | 0.03618521 | 0.7269563  | 7.5559327  | 7.27876073 | 7.63971549 | 7.48024008 |
| ILMN_1658957 | 0.04264963 | 0.72975832 | 7.48149512 | 6.83563864 | 7.66009076 | 6.17522358 |
| ILMN_1659047 | 0.02466382 | 0.73791088 | 9.61691912 | 9.86937237 | 10.0319507 | 10.6300423 |
| ILMN_1659437 | 0.04117212 | 0.71987015 | 11.6992289 | 10.6251755 | 10.634527  | 10.9777464 |
| ILMN_1659490 | 0.04721526 | 0.72227408 | 7.47577558 | 7.54706032 | 7.49987139 | 7.39536704 |
| ILMN_1659878 | 0.03389557 | 0.79246669 | 6.76722574 | 6.38453684 | 6.92886772 | 6.7015948  |
| ILMN_1660498 | 0.03931401 | 0.76945244 | 15.1541995 | 14.0454235 | 14.5304789 | 14.108629  |
| ILMN_1660549 | 0.04279546 | 0.63991796 | 8.02541478 | 6.78804878 | 7.22575018 | 7.19876031 |
| ILMN_1660942 | 0.0465267  | 0.82710653 | 6.44044913 | 6.48011273 | 6.54106919 | 5.98766535 |
| ILMN_1661196 | 0.02226929 | 0.68657612 | 9.06924594 | 7.90449253 | 9.15974043 | 9.21391443 |
| ILMN_1661466 | 0.03229566 | 0.80559606 | 6.47850221 | 6.03020805 | 6.25508769 | 6.02769859 |
| ILMN_1661636 | 0.04686079 | 0.69838424 | 8.83556064 | 7.48790112 | 7.91218578 | 7.89300538 |
| ILMN_1662617 | 0.02640941 | 0.65874607 | 10.3694872 | 9.08038639 | 9.56154629 | 10.0893181 |
| ILMN_1662846 | 0.02745936 | 0.64437652 | 7.9109215  | 7.08725491 | 7.83651245 | 8.52299378 |
| ILMN_1662865 | 0.03529648 | 0.6034407  | 8.1428295  | 6.87772585 | 7.59898148 | 7.82817648 |
| ILMN_1663422 | 0.0180202  | 0.70012101 | 9.55626348 | 8.9931572  | 9.48736113 | 10.1940957 |
| ILMN_1663437 | 0.02170087 | 0.71354447 | 7.41761373 | 6.60580039 | 7.02776227 | 7.19153304 |
| ILMN_1664047 | 0.02361668 | 0.74655969 | 6.60804379 | 6.67496056 | 6.36725468 | 6.38335835 |
| ILMN_1664577 | 0.037362   | 0.67480187 | 8.4658847  | 7.13993704 | 7.57521021 | 7.31875519 |
| ILMN_1664698 | 0.04028014 | 0.76298462 | 9.53053938 | 8.78447225 | 8.96663782 | 9.66757693 |
| ILMN_1664706 | 0.01919351 | 0.7133548  | 7.60836646 | 6.66423251 | 6.9766088  | 7.00836923 |
| ILMN_1664750 | 0.02655861 | 0.74802412 | 12.4272311 | 11.533793  | 11.80144   | 11.868103  |
| ILMN_1664802 | 0.04079438 | 0.67119674 | 9.82810442 | 7.80492025 | 8.21374436 | 8.60514242 |
| ILMN_1665384 | 0.04194668 | 0.75782178 | 8.79350772 | 8.13139245 | 8.21582661 | 8.42048872 |
| ILMN_1665557 | 0.03538694 | 0.63500425 | 9.52823823 | 8.23921949 | 8.7851778  | 9.45492354 |
| ILMN_1665781 | 0.03568531 | 0.80682594 | 8.98231056 | 8.54793637 | 9.09906082 | 8.67311894 |
| ILMN_1665982 | 0.04896871 | 0.68812735 | 8.96534766 | 6.85300133 | 7.53244243 | 7.32287095 |
| ILMN_1666376 | 0.03540638 | 0.68503491 | 9.77168638 | 8.25459404 | 8.14652896 | 8.28733515 |
| ILMN_1666480 | 0.027722   | 0.70586064 | 10.2218638 | 8.65748603 | 9.2187739  | 9.11513705 |
| ILMN_1667162 | 0.04594816 | 0.67131193 | 7.03456459 | 6.46622789 | 6.68274042 | 6.69403327 |
| ILMN_1667319 | 0.02547702 | 0.6475955  | 8.8749454  | 7.62472309 | 8.21737469 | 8.35337887 |
| ILMN_1667460 | 0.02678717 | 0.61610888 | 9.4654607  | 7.35594039 | 8.30781738 | 8.31908499 |
| ILMN_1667561 | 0.0219473  | 0.60215467 | 9.8788559  | 8.63012367 | 9.45172441 | 9.79712925 |
| ILMN_1667970 | 0.02028456 | 0.83352828 | 7.18997969 | 6.60507158 | 6.96744992 | 6.56620934 |
| ILMN_1667985 | 0.00745955 | 0.61890288 | 9.07832723 | 8.44782133 | 8.83600269 | 8.73765702 |
| ILMN_1668379 | 0.03742933 | 0.83385299 | 6.51412037 | 6.16203859 | 6.16410402 | 5.78168442 |
| ILMN_1669177 | 0.00761851 | 0.7061977  | 7.74948131 | 7.15156763 | 7.32843169 | 6.95784613 |
| ILMN_1669608 | 0.02841213 | 0.7278004  | 8.16330148 | 7.51359733 | 8.03551779 | 7.59103233 |
| ILMN_1669790 | 0.03302285 | 0.65122668 | 14.1203238 | 12.6130108 | 13.2279161 | 12.9432307 |
| ILMN_1670130 | 0.04589559 | 0.69867587 | 10.7084632 | 9.17976307 | 9.91975213 | 10.3619953 |
| ILMN_1670821 | 0.03840955 | 0.59309786 | 6.21393474 | 5.98161546 | 6.1392243  | 5.61110833 |
| ILMN_1671516 | 0.02129075 | 0.61296651 | 9.80903172 | 8.39377269 | 8.09806525 | 8.73488707 |
| ILMN_1671933 | 0.04752139 | 0.77511537 | 7.35592013 | 6.63650152 | 7.18428426 | 7.16527183 |
| ILMN_1672004 | 0.03164279 | 0.70753517 | 9.18318253 | 8.55053594 | 9.71048756 | 9.34397404 |
| ILMN_1672661 | 0.02848531 | 0.65065818 | 8.99319882 | 8.40974987 | 8.01056279 | 8.50864098 |
| ILMN_1672988 | 0.02024643 | 0.64795249 | 7.2746344  | 6.36948585 | 6.83161507 | 7.18308251 |
| ILMN_1673113 | 0.04356854 | 0.61302364 | 9.3328292  | 7.5454997  | 8.10165795 | 8.85850668 |
| ILMN_1674590 | 0.04267189 | 0.72809209 | 6.67035033 | 6.16165574 | 6.42486953 | 6.81141708 |

|              |            |            |            |            |            |            |
|--------------|------------|------------|------------|------------|------------|------------|
| ILMN_1674650 | 0.04467613 | 0.76477245 | 9.42299507 | 7.56194622 | 7.44027536 | 7.34041717 |
| ILMN_1675117 | 0.03899492 | 0.62746484 | 9.49966275 | 7.90644089 | 8.82165984 | 9.22093402 |
| ILMN_1675258 | 0.03561111 | 0.66140331 | 8.00817648 | 7.18796762 | 8.41678022 | 7.24395273 |
| ILMN_1675424 | 0.03630798 | 0.66895473 | 9.14615776 | 8.50191439 | 9.14611499 | 9.06661396 |
| ILMN_1675939 | 0.03846476 | 0.70361537 | 12.5907412 | 11.3882687 | 12.2310567 | 12.767015  |
| ILMN_1676016 | 0.0291055  | 0.80943544 | 6.53161555 | 6.89967715 | 6.66906646 | 5.85337069 |
| ILMN_1676665 | 0.03123601 | 0.7577298  | 7.79741187 | 8.58538135 | 9.00285889 | 8.57076119 |
| ILMN_1676737 | 0.04696222 | 0.7752066  | 6.54357244 | 6.46922128 | 6.584805   | 6.40941521 |
| ILMN_1676767 | 0.03943497 | 0.5385914  | 8.81501593 | 7.96751967 | 8.64946888 | 9.85626833 |
| ILMN_1677262 | 0.04607949 | 0.59397151 | 13.0813721 | 11.143461  | 10.5218105 | 11.3686729 |
| ILMN_1677511 | 0.04606087 | 0.6409039  | 8.75300342 | 7.18606272 | 7.91506132 | 8.58777602 |
| ILMN_1677843 | 0.03395397 | 0.71547996 | 11.5580299 | 10.7458163 | 10.5124778 | 10.7892687 |
| ILMN_1678170 | 0.00792294 | 0.59601979 | 11.107374  | 10.1451692 | 11.3156908 | 11.6339143 |
| ILMN_1678690 | 0.00149587 | 0.66288364 | 6.81206433 | 6.6216963  | 6.69241743 | 6.4700305  |
| ILMN_1678707 | 0.03991451 | 0.69297866 | 7.94437825 | 7.00703288 | 7.74309685 | 6.69047297 |
| ILMN_1678757 | 0.0270338  | 0.65826664 | 9.53813887 | 9.67539272 | 9.25927696 | 9.70147351 |
| ILMN_1678799 | 0.03407905 | 0.75742717 | 6.24211238 | 6.00109085 | 6.62423486 | 6.14296925 |
| ILMN_1678939 | 0.04313604 | 0.70311962 | 13.6567891 | 12.8136283 | 13.1236217 | 13.6593471 |
| ILMN_1679666 | 0.01862454 | 0.79574732 | 6.26521277 | 6.14769724 | 6.15639844 | 5.71676131 |
| ILMN_1679920 | 0.02931304 | 0.64358563 | 12.5785319 | 12.1815912 | 10.1079794 | 9.67077679 |
| ILMN_1680279 | 0.03350039 | 0.62837153 | 11.1475745 | 10.3148664 | 10.7502799 | 10.8158964 |
| ILMN_1680314 | 0.00864226 | 0.64756847 | 11.5294159 | 10.8388636 | 11.4845823 | 12.1286562 |
| ILMN_1681130 | 0.03091266 | 0.76590747 | 8.06707129 | 6.84268473 | 7.22700842 | 6.97950522 |
| ILMN_1681683 | 0.01489961 | 0.57023733 | 8.86477858 | 6.93739501 | 7.15100943 | 7.92991347 |
| ILMN_1681888 | 0.03851427 | 0.76608665 | 6.8810442  | 6.84150019 | 7.26723333 | 6.59561465 |
| ILMN_1682165 | 0.03172151 | 0.65292393 | 11.5317952 | 10.0068212 | 10.2825545 | 10.9064585 |
| ILMN_1682443 | 0.03615179 | 0.6495768  | 12.0345985 | 10.6096986 | 10.6898207 | 11.2135107 |
| ILMN_1682699 | 0.01361885 | 0.64028818 | 8.96425797 | 7.10367807 | 7.54076272 | 8.11589731 |
| ILMN_1682757 | 0.02993952 | 0.55798965 | 7.72561575 | 7.17229949 | 7.40774872 | 8.8658916  |
| ILMN_1683494 | 0.02904661 | 0.66051778 | 10.8387013 | 10.6752849 | 11.2707719 | 11.3963827 |
| ILMN_1683959 | 0.01705165 | 0.76547399 | 7.0288277  | 6.44984279 | 6.76743896 | 6.48298087 |
| ILMN_1684054 | 0.04932318 | 0.80571873 | 7.48399308 | 7.1718213  | 8.09495966 | 7.92856812 |
| ILMN_1684585 | 0.02691987 | 0.56307844 | 11.6869141 | 10.665645  | 10.6923897 | 12.2690942 |
| ILMN_1685312 | 0.02211059 | 0.64373813 | 7.99478109 | 7.02790379 | 7.54299933 | 7.3956181  |
| ILMN_1685493 | 0.04494352 | 0.65174709 | 7.61396328 | 6.95989416 | 7.87800676 | 7.78979314 |
| ILMN_1685628 | 0.01240387 | 0.65756989 | 12.7642351 | 11.972711  | 11.8486926 | 12.3651282 |
| ILMN_1686116 | 0.03519944 | 0.58272003 | 8.38021688 | 7.77662319 | 9.02748833 | 8.53320045 |
| ILMN_1686464 | 0.04760029 | 0.69823557 | 8.02752012 | 7.23859868 | 7.76616115 | 8.34873966 |
| ILMN_1686750 | 0.0433905  | 0.72327785 | 12.4417122 | 11.2331241 | 11.7441863 | 11.9574496 |
| ILMN_1686862 | 0.02000637 | 0.73257137 | 7.64631605 | 7.26415826 | 7.04105348 | 7.26510023 |
| ILMN_1686981 | 0.02359098 | 0.59853707 | 8.05828619 | 6.24122851 | 7.04651071 | 7.01958962 |
| ILMN_1687057 | 0.049469   | 0.70480187 | 8.28477136 | 6.76967522 | 7.00687696 | 7.04246815 |
| ILMN_1687384 | 0.02690716 | 0.68006639 | 11.2582492 | 8.90552811 | 10.1533443 | 10.2830004 |
| ILMN_1687805 | 0.02092321 | 0.73151486 | 14.7458376 | 13.8233016 | 13.6738313 | 13.6149468 |
| ILMN_1688490 | 0.01551608 | 0.67404311 | 8.33775346 | 8.40535338 | 8.18426591 | 8.45136156 |
| ILMN_1688580 | 0.03985474 | 0.68048617 | 11.0949499 | 9.20124863 | 11.1220605 | 10.6720867 |
| ILMN_1688666 | 0.03725174 | 0.74410908 | 7.25755568 | 6.94669811 | 6.57239555 | 6.85940806 |
| ILMN_1689004 | 0.00188777 | 0.74093787 | 6.9097803  | 6.17444677 | 6.49805137 | 6.74734309 |

|              |            |            |            |            |            |            |
|--------------|------------|------------|------------|------------|------------|------------|
| ILMN_1689955 | 0.04109953 | 0.82527325 | 7.02382309 | 6.59511259 | 6.59133788 | 6.35107085 |
| ILMN_1690114 | 0.02584932 | 0.66870912 | 9.77636032 | 9.03347201 | 8.86500695 | 9.11015023 |
| ILMN_1691364 | 0.04228554 | 0.70764278 | 12.4410254 | 12.5133881 | 10.8801521 | 11.0762872 |
| ILMN_1691428 | 0.01810185 | 0.72831086 | 13.9460811 | 13.5855518 | 13.5894077 | 13.8858422 |
| ILMN_1691508 | 0.03608453 | 0.73901795 | 8.55917095 | 8.92282342 | 9.1850952  | 9.12166923 |
| ILMN_1691574 | 0.03275834 | 0.60818227 | 8.67455916 | 6.6846238  | 7.0105986  | 7.82965615 |
| ILMN_1691881 | 0.02573877 | 0.8133981  | 6.15282429 | 6.75532959 | 6.80457248 | 6.52060438 |
| ILMN_1692145 | 0.04103045 | 0.62621689 | 12.1852781 | 11.4104487 | 11.8847524 | 11.840444  |
| ILMN_1693394 | 0.03766476 | 0.76046797 | 10.4487905 | 9.70959685 | 10.0051122 | 10.0533585 |
| ILMN_1693494 | 0.04680144 | 0.79860694 | 7.26344856 | 6.75371952 | 6.63814018 | 6.46762609 |
| ILMN_1693789 | 0.02384987 | 0.61698714 | 11.7712732 | 10.8879098 | 11.0538261 | 11.0916939 |
| ILMN_1694075 | 0.01160109 | 0.72305822 | 8.34758328 | 7.75085904 | 7.82534871 | 8.92650979 |
| ILMN_1694399 | 0.0230504  | 0.70607854 | 9.44927041 | 8.85414748 | 8.82315799 | 9.0826052  |
| ILMN_1694584 | 0.03041394 | 0.78982682 | 6.4479309  | 5.88388836 | 6.28900538 | 6.08748427 |
| ILMN_1694742 | 0.04359298 | 0.79662118 | 15.0813332 | 14.0430247 | 14.5658036 | 13.9275835 |
| ILMN_1695435 | 0.01054341 | 0.69671593 | 7.08459795 | 6.69807537 | 6.9881325  | 7.72902315 |
| ILMN_1695468 | 0.04652008 | 0.77244158 | 6.6781029  | 6.6877312  | 7.30754237 | 7.40977193 |
| ILMN_1695853 | 0.03060682 | 0.65524188 | 8.06743544 | 6.83843499 | 7.07149454 | 7.12160708 |
| ILMN_1696027 | 0.04350034 | 0.67986662 | 9.66067713 | 9.13720302 | 9.30851242 | 9.47469764 |
| ILMN_1696162 | 0.04043779 | 0.84911952 | 6.14416305 | 6.04886239 | 6.44034979 | 6.16887666 |
| ILMN_1696187 | 0.03766499 | 0.62357425 | 11.9791647 | 10.0492646 | 11.196816  | 12.2423039 |
| ILMN_1696466 | 0.02183896 | 0.72959243 | 8.77798971 | 8.13963832 | 8.74248898 | 9.47740514 |
| ILMN_1696704 | 0.02722924 | 0.72265839 | 7.94818674 | 7.38870789 | 7.84383251 | 7.78866679 |
| ILMN_1697304 | 0.04993868 | 0.76825905 | 7.12891921 | 6.75346682 | 6.92669094 | 6.71483622 |
| ILMN_1697377 | 0.04463471 | 0.69850338 | 6.68453544 | 6.14996656 | 6.27927256 | 6.31012196 |
| ILMN_1698213 | 0.0193828  | 0.80446305 | 7.81481828 | 6.95995094 | 7.70470877 | 6.83527987 |
| ILMN_1699015 | 0.0240332  | 0.76984958 | 14.7089109 | 14.0060543 | 14.5236624 | 14.3798136 |
| ILMN_1699331 | 0.02644333 | 0.60266054 | 6.83494881 | 6.57904812 | 6.24671799 | 5.79081686 |
| ILMN_1699383 | 0.03358542 | 0.81936599 | 7.19239047 | 6.67053304 | 6.77972855 | 7.03828253 |
| ILMN_1699687 | 0.02189761 | 0.75701865 | 6.45707515 | 6.13667148 | 6.1831931  | 5.9308868  |
| ILMN_1700182 | 0.03012897 | 0.71409936 | 13.1976412 | 11.9265755 | 12.1409675 | 12.7420622 |
| ILMN_1700610 | 0.02743074 | 0.69400317 | 8.39584256 | 7.86277372 | 7.92270332 | 8.71672448 |
| ILMN_1700896 | 0.01363125 | 0.50642127 | 8.42860011 | 7.17834217 | 8.17501354 | 8.00350442 |
| ILMN_1701242 | 0.0253789  | 0.74418201 | 6.4530001  | 6.15891481 | 6.18696499 | 5.81842624 |
| ILMN_1701747 | 0.04934732 | 0.83021473 | 6.69189424 | 6.20652504 | 6.26426543 | 6.07102337 |
| ILMN_1701957 | 0.02126631 | 0.58892087 | 11.675393  | 10.9970778 | 11.4726015 | 11.6803037 |
| ILMN_1702168 | 0.03741472 | 0.73249678 | 9.17733532 | 7.98855745 | 8.07178787 | 8.3837436  |
| ILMN_1703720 | 0.00762214 | 0.68139965 | 10.674157  | 9.15202924 | 9.70243695 | 9.80523392 |
| ILMN_1704385 | 0.01810021 | 0.51213732 | 11.2140027 | 8.97206478 | 9.77500641 | 10.396258  |
| ILMN_1704476 | 0.04609397 | 0.81323076 | 6.64697337 | 6.27236515 | 6.34911754 | 5.92940116 |
| ILMN_1705477 | 0.02914213 | 0.77925703 | 6.51225565 | 6.4156642  | 6.70260214 | 6.41179603 |
| ILMN_1705605 | 0.02532555 | 0.62850884 | 8.39276562 | 7.3199656  | 8.35252903 | 6.89336828 |
| ILMN_1706502 | 0.01556267 | 0.58390627 | 9.9963379  | 10.8837583 | 9.55903344 | 10.035272  |
| ILMN_1708485 | 0.01864396 | 0.70205561 | 7.72367187 | 7.07135617 | 7.33528762 | 6.65473053 |
| ILMN_1708841 | 0.04742674 | 0.67021081 | 10.1869388 | 8.47797597 | 9.24214492 | 9.33322514 |
| ILMN_1708936 | 0.03337196 | 0.70874144 | 9.77830124 | 8.09165541 | 8.41219552 | 8.44806756 |
| ILMN_1709164 | 0.02941149 | 0.75703754 | 7.68162636 | 7.94043106 | 7.71373293 | 7.40607657 |
| ILMN_1709707 | 0.04238071 | 0.85383488 | 6.23196994 | 5.95561364 | 6.17467866 | 5.79357106 |

|              |            |            |            |            |            |            |
|--------------|------------|------------|------------|------------|------------|------------|
| ILMN_1710362 | 0.04157112 | 0.76920064 | 7.79037326 | 6.98816431 | 7.17351525 | 6.85153293 |
| ILMN_1710974 | 0.03533472 | 0.63323745 | 12.943121  | 10.8873318 | 11.9649004 | 12.8217624 |
| ILMN_1711073 | 0.01405347 | 0.6411207  | 10.9501265 | 10.1850414 | 9.93271806 | 10.448742  |
| ILMN_1711156 | 0.03433604 | 0.76010835 | 14.5006907 | 13.921099  | 13.9466596 | 13.9328339 |
| ILMN_1711617 | 0.01600477 | 0.66135292 | 13.008043  | 11.4844045 | 11.8463919 | 12.668585  |
| ILMN_1711729 | 0.03453758 | 0.60814527 | 12.2679457 | 10.4152749 | 10.4558686 | 10.2735963 |
| ILMN_1712389 | 0.01597405 | 0.69113487 | 12.9883481 | 11.8465439 | 12.3997706 | 12.4690539 |
| ILMN_1712596 | 0.03288592 | 0.72797317 | 7.31390881 | 7.06657252 | 7.11042484 | 6.97708297 |
| ILMN_1712688 | 0.02426725 | 0.79722532 | 7.56396805 | 6.7717628  | 6.91859256 | 7.17882218 |
| ILMN_1712918 | 0.03314652 | 0.62320921 | 8.23012374 | 7.97656011 | 8.91504488 | 9.65829201 |
| ILMN_1713319 | 0.0194869  | 0.65622699 | 9.4046624  | 8.72892149 | 8.69518096 | 8.98705221 |
| ILMN_1713636 | 0.01729628 | 0.6907968  | 12.8429727 | 12.9072978 | 12.840846  | 13.1198204 |
| ILMN_1713706 | 0.01842635 | 0.67755647 | 9.40308789 | 9.33017339 | 9.3746033  | 9.91578051 |
| ILMN_1714065 | 0.01035268 | 0.73820948 | 6.76346071 | 5.94913545 | 6.4788746  | 6.00271895 |
| ILMN_1714418 | 0.00910934 | 0.60836911 | 7.3269166  | 7.74961136 | 8.93145939 | 7.89667389 |
| ILMN_1714848 | 0.00569427 | 0.62554357 | 7.37641021 | 6.57746931 | 6.712908   | 6.95465697 |
| ILMN_1714991 | 0.0422315  | 0.71365708 | 13.33423   | 12.367012  | 12.9937824 | 13.7108968 |
| ILMN_1715693 | 0.03416076 | 0.83468095 | 6.23954545 | 6.29292141 | 6.03669893 | 5.62217748 |
| ILMN_1715809 | 0.03716245 | 0.75966037 | 8.22476287 | 7.54548811 | 7.97384486 | 8.00551676 |
| ILMN_1716465 | 0.01729694 | 0.64472115 | 9.6502991  | 8.23297823 | 9.04851875 | 8.61037747 |
| ILMN_1717371 | 0.04602444 | 0.82876408 | 6.69975705 | 6.40713824 | 7.10840632 | 6.31085304 |
| ILMN_1718303 | 0.03887466 | 0.49428875 | 6.6763591  | 6.34442428 | 6.32386686 | 6.50420246 |
| ILMN_1719951 | 0.04653004 | 0.60741284 | 9.04208779 | 7.40041411 | 7.93357087 | 7.96686244 |
| ILMN_1719988 | 0.03731506 | 0.72172595 | 7.26644925 | 6.73449151 | 6.94726288 | 7.66706114 |
| ILMN_1720604 | 0.03548573 | 0.75934736 | 7.7214212  | 6.89778617 | 7.32006853 | 6.92360084 |
| ILMN_1721116 | 0.03411519 | 0.68364283 | 10.0016404 | 9.77312157 | 10.4331285 | 11.5624175 |
| ILMN_1721204 | 0.00791158 | 0.64737784 | 10.1758938 | 9.65516271 | 10.3062736 | 10.1711956 |
| ILMN_1721349 | 0.03914856 | 0.5993326  | 10.9021769 | 10.048367  | 10.2729073 | 10.318745  |
| ILMN_1721648 | 0.04615408 | 0.70733795 | 9.34233629 | 7.71428262 | 8.45275397 | 8.63114103 |
| ILMN_1721729 | 0.0320432  | 0.62937111 | 8.94360579 | 8.02801268 | 8.13329328 | 8.22948218 |
| ILMN_1722076 | 0.04703175 | 0.67202513 | 12.0845759 | 11.1363619 | 11.3079248 | 11.9621922 |
| ILMN_1722223 | 0.04278418 | 0.78316468 | 6.79129706 | 6.22355094 | 6.23781856 | 6.01812605 |
| ILMN_1723079 | 0.02970603 | 0.72043097 | 9.42156058 | 8.60740689 | 9.20456136 | 9.96539615 |
| ILMN_1723486 | 0.00912968 | 0.64900163 | 8.63381116 | 7.86020675 | 8.58298044 | 8.92498615 |
| ILMN_1723909 | 0.02017026 | 0.67179385 | 7.31473277 | 6.86509729 | 7.05863146 | 7.30631602 |
| ILMN_1724315 | 0.02762385 | 0.80674242 | 6.97842218 | 6.42657306 | 6.66762961 | 6.53338191 |
| ILMN_1724407 | 0.03429979 | 0.70724607 | 10.2648308 | 8.56658458 | 8.99849679 | 8.9574811  |
| ILMN_1724533 | 0.01351725 | 0.59918915 | 11.5842297 | 10.7403281 | 10.4145732 | 11.1693463 |
| ILMN_1725427 | 0.03136878 | 0.77197894 | 14.9948409 | 14.138759  | 14.1347817 | 14.6419095 |
| ILMN_1726289 | 0.01747537 | 0.59825303 | 10.777626  | 9.96441842 | 10.6607046 | 11.2136644 |
| ILMN_1726636 | 0.01297901 | 0.76907172 | 6.81861669 | 6.52236088 | 6.66187926 | 6.56383065 |
| ILMN_1726786 | 0.01713798 | 0.70672295 | 9.57843949 | 9.34323747 | 9.44228418 | 9.84673556 |
| ILMN_1727603 | 0.04412871 | 0.81207953 | 7.46742867 | 7.20633651 | 7.56505637 | 7.01267146 |
| ILMN_1728639 | 0.03972765 | 0.73634149 | 13.9531825 | 13.1609396 | 13.4442009 | 14.2925661 |
| ILMN_1728677 | 0.01055091 | 0.6364999  | 8.18943369 | 8.67686575 | 9.50302607 | 9.73853801 |
| ILMN_1728724 | 0.01527998 | 0.6232623  | 9.58361592 | 9.64983907 | 9.91338806 | 9.68721487 |
| ILMN_1728844 | 0.04727955 | 0.77639162 | 7.0063272  | 6.46018507 | 6.48630731 | 6.78151971 |
| ILMN_1729294 | 0.04638838 | 0.70887944 | 10.9886705 | 9.49222254 | 10.2418962 | 10.235252  |

|              |            |            |            |            |            |            |
|--------------|------------|------------|------------|------------|------------|------------|
| ILMN_1729659 | 0.01151918 | 0.70426537 | 6.95742364 | 6.24194522 | 7.02798338 | 7.02049887 |
| ILMN_1729801 | 0.02480952 | 0.80433254 | 15.0076686 | 14.63653   | 14.6822611 | 14.4996871 |
| ILMN_1730454 | 0.02587184 | 0.57417077 | 10.6717224 | 9.67630585 | 9.50798012 | 11.5757841 |
| ILMN_1730678 | 0.02061662 | 0.7051953  | 11.9694675 | 11.1794364 | 11.1308324 | 11.3685834 |
| ILMN_1730928 | 0.0048553  | 0.63050483 | 8.64566204 | 8.17274002 | 9.2939183  | 9.56826549 |
| ILMN_1731048 | 0.02388277 | 0.50621945 | 10.0515543 | 7.73021673 | 8.27441869 | 8.97588665 |
| ILMN_1731203 | 0.03803663 | 0.75827104 | 7.60273523 | 7.45376942 | 7.1340864  | 7.43155026 |
| ILMN_1731546 | 0.04360587 | 0.69795296 | 12.5705687 | 11.9784774 | 12.2777494 | 10.9767381 |
| ILMN_1731785 | 0.0458795  | 0.67462806 | 6.49153856 | 5.98718555 | 6.4046002  | 6.46669367 |
| ILMN_1732311 | 0.03794346 | 0.77945233 | 6.72030036 | 7.15487379 | 6.81274849 | 6.72603828 |
| ILMN_1733983 | 0.03516943 | 0.77609426 | 6.5135307  | 6.32947974 | 6.67017751 | 5.84673425 |
| ILMN_1734991 | 0.02888959 | 0.74080227 | 6.81523726 | 7.35116275 | 7.88445567 | 6.88736198 |
| ILMN_1735014 | 0.04129974 | 0.72928513 | 12.9149378 | 12.5280712 | 12.4517131 | 12.6030122 |
| ILMN_1735506 | 0.02313855 | 0.66811802 | 9.02996714 | 9.28016875 | 8.86833304 | 8.15707454 |
| ILMN_1735955 | 0.02614024 | 0.67721495 | 9.30644476 | 7.76441052 | 7.9938668  | 7.97083813 |
| ILMN_1736008 | 0.04987902 | 0.63545161 | 10.7293735 | 9.51853868 | 9.7997066  | 10.1669652 |
| ILMN_1736190 | 0.04827008 | 0.62863899 | 11.4841749 | 9.77053357 | 10.8636001 | 11.1764312 |
| ILMN_1736982 | 0.01215593 | 0.69087927 | 6.42304093 | 7.07989114 | 7.24433624 | 6.65986464 |
| ILMN_1737426 | 0.04791158 | 0.64576947 | 10.5681652 | 8.82056225 | 9.41667658 | 9.91593957 |
| ILMN_1737878 | 0.04495929 | 0.81087537 | 6.74534491 | 6.58660098 | 6.58718209 | 6.49259413 |
| ILMN_1738243 | 0.03038466 | 0.7416694  | 14.8957499 | 13.8117399 | 14.4019301 | 13.8207185 |
| ILMN_1738482 | 0.03217564 | 0.71381727 | 8.91391203 | 8.34023779 | 8.11964875 | 8.61209332 |
| ILMN_1738643 | 0.04149091 | 0.75593989 | 6.80506411 | 6.07832504 | 6.29717564 | 5.94869452 |
| ILMN_1738821 | 0.04391898 | 0.8091662  | 7.77800812 | 6.95790648 | 7.3819478  | 6.98258409 |
| ILMN_1739263 | 0.03678171 | 0.68662298 | 14.5238553 | 11.9281242 | 12.8762403 | 12.2481325 |
| ILMN_1739283 | 0.04562368 | 0.73384391 | 9.02205066 | 9.26282611 | 9.33432782 | 9.00768663 |
| ILMN_1739423 | 0.01894898 | 0.75456789 | 6.83405256 | 6.33794082 | 6.32998985 | 6.1475375  |
| ILMN_1739587 | 0.008502   | 0.64481903 | 6.31246896 | 6.09842482 | 6.10652923 | 5.77442153 |
| ILMN_1739622 | 0.03797193 | 0.61741953 | 9.24863445 | 7.40932389 | 8.22104764 | 8.46171517 |
| ILMN_1739876 | 0.04014082 | 0.72778106 | 9.75641838 | 9.07589706 | 8.54862928 | 8.54217214 |
| ILMN_1740165 | 0.02940505 | 0.71813807 | 8.84310701 | 9.15167848 | 8.9225737  | 8.90827102 |
| ILMN_1741073 | 0.0350871  | 0.80687698 | 6.40386469 | 6.17685431 | 6.68323747 | 6.59278635 |
| ILMN_1741917 | 0.0169043  | 0.684229   | 9.06561324 | 8.44459212 | 9.0453941  | 9.25286787 |
| ILMN_1743034 | 0.01881818 | 0.69390438 | 7.27053081 | 6.96984005 | 7.05088692 | 7.71537244 |
| ILMN_1743281 | 0.04631418 | 0.67846131 | 8.95011055 | 7.42542657 | 7.82634319 | 8.26883718 |
| ILMN_1743476 | 0.01661299 | 0.73435808 | 7.30736021 | 6.8927128  | 6.93506955 | 7.13057674 |
| ILMN_1746020 | 0.04993035 | 0.70883883 | 6.55361639 | 6.22185273 | 6.50586077 | 6.69179236 |
| ILMN_1746276 | 0.01501639 | 0.65630005 | 6.86862627 | 6.60747147 | 7.03580643 | 6.60559804 |
| ILMN_1746577 | 0.01566441 | 0.68593279 | 10.4187961 | 9.41689103 | 9.40040387 | 10.1043118 |
| ILMN_1746864 | 0.04432744 | 0.6138112  | 11.4387295 | 9.77456685 | 10.3434145 | 10.7783794 |
| ILMN_1746919 | 0.04003091 | 0.74508699 | 6.9707812  | 6.33112296 | 6.35555178 | 6.58105442 |
| ILMN_1747047 | 0.04730674 | 0.80481102 | 6.74913063 | 6.44879542 | 6.65745994 | 6.07110341 |
| ILMN_1747205 | 0.04360287 | 0.76509833 | 7.57503166 | 6.78453408 | 7.22149819 | 7.62429248 |
| ILMN_1748090 | 0.03450901 | 0.6557916  | 6.86961852 | 6.32885459 | 6.61155927 | 6.79204322 |
| ILMN_1748366 | 0.04668742 | 0.81750259 | 6.21450156 | 5.98624322 | 5.960527   | 6.10563639 |
| ILMN_1748767 | 0.02574605 | 0.64144703 | 13.006595  | 11.2294059 | 11.6937413 | 12.7783731 |
| ILMN_1748915 | 0.02617672 | 0.44861085 | 10.229636  | 8.17540983 | 9.48881784 | 10.3402351 |
| ILMN_1749006 | 0.04308302 | 0.70484262 | 9.94282969 | 8.55647578 | 9.32009268 | 9.1181427  |

|              |            |            |            |            |            |            |
|--------------|------------|------------|------------|------------|------------|------------|
| ILMN_1749673 | 0.03098645 | 0.74057841 | 8.80394317 | 8.01529908 | 9.19996527 | 8.83149854 |
| ILMN_1750093 | 0.0168406  | 0.73019352 | 11.6221754 | 11.3162549 | 11.0506126 | 11.2037383 |
| ILMN_1750880 | 0.02748177 | 0.72560601 | 7.15769557 | 6.30049168 | 6.5476565  | 6.81551907 |
| ILMN_1750961 | 0.04949418 | 0.72044766 | 8.91982422 | 7.94429332 | 9.08190706 | 9.50828325 |
| ILMN_1751051 | 0.03975061 | 0.70579569 | 8.2967061  | 7.39952831 | 7.50965705 | 7.84244086 |
| ILMN_1751351 | 0.0484634  | 0.69265059 | 6.63487943 | 6.20903395 | 6.16232808 | 5.93183337 |
| ILMN_1751749 | 0.01836375 | 0.72815944 | 7.49206307 | 6.83477188 | 7.55572108 | 6.84845769 |
| ILMN_1753712 | 0.02948522 | 0.74102814 | 10.6286943 | 9.41774621 | 10.0152018 | 9.76632715 |
| ILMN_1753819 | 0.03810533 | 0.66379162 | 9.49695302 | 8.09531209 | 9.20304401 | 9.31801105 |
| ILMN_1754395 | 0.04776421 | 0.7677589  | 7.63522692 | 6.64545381 | 7.1334505  | 6.49317112 |
| ILMN_1754859 | 0.02630922 | 0.76672095 | 7.48236429 | 6.9799533  | 6.8394797  | 7.33306051 |
| ILMN_1755049 | 0.02884803 | 0.76637773 | 6.58276222 | 6.06265861 | 6.34809783 | 5.83403865 |
| ILMN_1755077 | 0.03531818 | 0.64369729 | 11.2539332 | 9.68949434 | 10.0911802 | 10.5068758 |
| ILMN_1755114 | 0.01355935 | 0.68312006 | 8.60732218 | 7.9335809  | 7.82491802 | 8.15421914 |
| ILMN_1755115 | 0.03674114 | 0.64243278 | 12.1857817 | 7.91256005 | 9.73690434 | 9.02826248 |
| ILMN_1756506 | 0.04857105 | 0.7225517  | 6.24985166 | 6.014089   | 6.02256667 | 5.56074919 |
| ILMN_1756998 | 0.04439977 | 0.69757131 | 6.31149676 | 6.29930255 | 6.70550107 | 6.44828516 |
| ILMN_1758418 | 0.02016829 | 0.63914595 | 11.6766192 | 11.3393573 | 10.45165   | 11.2998233 |
| ILMN_1758658 | 0.01579283 | 0.69136037 | 9.66447253 | 8.20156868 | 8.62305879 | 9.09252539 |
| ILMN_1759208 | 0.02449679 | 0.66571621 | 12.4151206 | 11.5770573 | 11.450586  | 12.5226132 |
| ILMN_1759250 | 0.04647064 | 1.15609374 | 6.80355641 | 6.72584066 | 7.02740622 | 6.0807943  |
| ILMN_1759613 | 0.03611932 | 0.81729371 | 6.37595794 | 6.05350911 | 6.0540338  | 5.72891448 |
| ILMN_1759872 | 0.04013308 | 0.75798727 | 14.753037  | 13.8070147 | 14.0099231 | 14.2815613 |
| ILMN_1760347 | 0.01976178 | 0.75067419 | 14.282615  | 13.9134635 | 14.4107442 | 14.4307067 |
| ILMN_1760509 | 0.00654443 | 1.34180301 | 11.8703767 | 10.2775338 | 10.3447153 | 10.1866962 |
| ILMN_1760542 | 0.00489019 | 0.73703635 | 6.50661416 | 6.39981845 | 6.7099316  | 6.38301941 |
| ILMN_1760779 | 0.04561215 | 0.7412942  | 7.80284526 | 7.07855433 | 7.44762961 | 7.57773622 |
| ILMN_1761411 | 0.04186005 | 0.78271634 | 7.61079011 | 6.82749768 | 7.04842584 | 7.14557862 |
| ILMN_1763260 | 0.04728466 | 0.67986491 | 7.66554413 | 7.33723297 | 8.30787975 | 8.2825005  |
| ILMN_1763408 | 0.024028   | 0.74325947 | 6.64057408 | 6.12464969 | 6.51443239 | 6.39697495 |
| ILMN_1763452 | 0.04738204 | 0.72732674 | 12.5519687 | 11.4474382 | 12.26113   | 12.8108287 |
| ILMN_1763809 | 0.02689206 | 0.55733105 | 9.44020454 | 8.31856179 | 10.6778403 | 10.9230667 |
| ILMN_1763837 | 0.03015834 | 0.6262042  | 10.0331105 | 9.18101979 | 9.63646766 | 9.64657401 |
| ILMN_1764082 | 0.03456126 | 0.75384766 | 8.61045868 | 7.91116306 | 8.25892166 | 8.36132754 |
| ILMN_1764396 | 0.01846108 | 0.58395347 | 9.51877549 | 7.82007299 | 7.63533504 | 7.96641605 |
| ILMN_1764415 | 0.0185249  | 0.73911887 | 8.13214084 | 7.05868665 | 7.2207256  | 7.28851822 |
| ILMN_1765061 | 0.03218534 | 0.70733821 | 8.08643933 | 7.41101857 | 7.08047859 | 7.28220718 |
| ILMN_1765122 | 0.04646311 | 0.65451904 | 9.08672566 | 8.46016344 | 8.68726124 | 9.09746174 |
| ILMN_1766176 | 0.04185669 | 0.75392774 | 6.5435064  | 6.86885959 | 7.42948792 | 6.78799003 |
| ILMN_1767809 | 0.03398026 | 0.68931984 | 7.93066875 | 6.96557306 | 7.6838417  | 8.16027231 |
| ILMN_1768117 | 0.04019261 | 0.68370785 | 10.4770894 | 9.11796693 | 9.50521391 | 9.64032267 |
| ILMN_1768394 | 0.03999826 | 0.62248965 | 12.7110915 | 10.9597339 | 11.1697885 | 12.3137934 |
| ILMN_1769705 | 0.03683845 | 0.76314354 | 11.5833066 | 10.8959547 | 11.6125055 | 12.1217899 |
| ILMN_1769734 | 0.03159924 | 0.58294769 | 9.69140016 | 9.20710976 | 8.70641728 | 9.36048434 |
| ILMN_1769741 | 0.04036404 | 0.82345668 | 6.58839458 | 6.34595658 | 6.32908179 | 6.07437549 |
| ILMN_1769764 | 0.03556279 | 0.71514382 | 7.82089056 | 7.08236303 | 7.20716273 | 7.20127804 |
| ILMN_1769937 | 0.02965659 | 0.61492565 | 11.6576583 | 10.2297694 | 9.97065669 | 8.83850621 |
| ILMN_1770161 | 0.04573148 | 0.75238697 | 8.1653452  | 8.03478906 | 8.20992411 | 8.12913926 |

|              |            |            |            |            |            |            |
|--------------|------------|------------|------------|------------|------------|------------|
| ILMN_1770244 | 0.02481804 | 0.65812975 | 8.48891061 | 7.41310745 | 7.78106328 | 7.92829748 |
| ILMN_1770831 | 0.03185773 | 0.81723647 | 6.28009166 | 6.61162861 | 6.73671175 | 6.12682752 |
| ILMN_1771048 | 0.03484549 | 0.71765577 | 7.22183456 | 8.33553149 | 8.63677939 | 7.90553021 |
| ILMN_1771320 | 0.02180083 | 0.72534908 | 8.19475242 | 8.63994624 | 8.47394192 | 9.01656123 |
| ILMN_1771664 | 0.02349416 | 0.61499023 | 8.11061955 | 7.08854234 | 8.17376707 | 8.69763067 |
| ILMN_1771815 | 0.04473703 | 0.7453723  | 12.3852835 | 11.4797484 | 11.6326627 | 11.908667  |
| ILMN_1772163 | 0.03896007 | 0.61677744 | 6.38228371 | 6.07101629 | 5.97672129 | 5.74012803 |
| ILMN_1772387 | 0.04699854 | 0.70632147 | 7.74357152 | 7.54856455 | 7.97965669 | 8.47256738 |
| ILMN_1772492 | 0.02685648 | 0.64919763 | 12.4282207 | 11.5074215 | 11.5494073 | 12.0162686 |
| ILMN_1773154 | 0.0359757  | 0.69737534 | 12.8150124 | 11.8658678 | 12.5007899 | 13.1157806 |
| ILMN_1773650 | 0.02168685 | 0.60217216 | 7.28423279 | 6.85930245 | 8.43835149 | 5.46324284 |
| ILMN_1773757 | 0.0364226  | 0.77438003 | 7.03090876 | 6.82659933 | 6.75541906 | 6.94034649 |
| ILMN_1775268 | 0.03883714 | 0.65027683 | 7.19165246 | 6.72496535 | 7.21724817 | 7.63641509 |
| ILMN_1776195 | 0.03293121 | 0.70180933 | 6.07968573 | 5.81563178 | 6.01267906 | 5.46605149 |
| ILMN_1776290 | 0.0224419  | 0.69775818 | 10.808883  | 9.9900841  | 9.49340756 | 10.2958022 |
| ILMN_1776515 | 0.04724214 | 0.74797572 | 11.1039264 | 9.78430652 | 9.47572674 | 10.1424185 |
| ILMN_1776649 | 0.01605471 | 0.52227826 | 10.0642739 | 8.64870199 | 9.36396432 | 9.91495178 |
| ILMN_1777565 | 0.0390811  | 0.69544625 | 10.5873866 | 9.70087021 | 8.89706431 | 8.8275739  |
| ILMN_1778202 | 0.01340747 | 0.61458112 | 9.33968814 | 8.67161855 | 8.33088955 | 8.58085399 |
| ILMN_1778457 | 0.01335202 | 0.68407871 | 13.1638857 | 12.36177   | 12.2177663 | 12.6993085 |
| ILMN_1778709 | 0.0379524  | 0.73942115 | 6.96280233 | 6.1358209  | 6.80580448 | 6.84120453 |
| ILMN_1778930 | 0.01901809 | 0.65601231 | 7.50931739 | 6.23768589 | 6.55595416 | 6.66560737 |
| ILMN_1779228 | 0.00826694 | 0.69482096 | 7.10452223 | 6.17609215 | 6.58685345 | 6.08893746 |
| ILMN_1779572 | 0.04673331 | 0.79404381 | 6.48773088 | 6.34498504 | 6.79113293 | 6.59399788 |
| ILMN_1780496 | 0.03800162 | 0.82404777 | 6.80129707 | 6.49553576 | 6.59193174 | 6.38134845 |
| ILMN_1781198 | 0.03791742 | 0.7246858  | 8.7404979  | 7.66256157 | 8.0129245  | 8.52832908 |
| ILMN_1782459 | 0.04190805 | 0.54682459 | 10.6120539 | 8.0372647  | 8.83668443 | 9.07209133 |
| ILMN_1783060 | 0.01680589 | 0.62135054 | 7.52463339 | 6.87549135 | 7.2769693  | 7.6061209  |
| ILMN_1783085 | 0.04838214 | 0.67817979 | 13.1058473 | 11.7557985 | 12.3105972 | 12.9253276 |
| ILMN_1783675 | 0.04322112 | 0.73523955 | 9.46638669 | 7.80446277 | 8.52333691 | 8.43362091 |
| ILMN_1783795 | 0.00304682 | 0.45763251 | 7.97448113 | 5.75005279 | 6.97940919 | 5.50409184 |
| ILMN_1783805 | 0.04729595 | 0.69426592 | 7.90750181 | 7.28602171 | 7.09514169 | 6.60562545 |
| ILMN_1784300 | 0.02213331 | 0.61468043 | 10.4989758 | 8.2203822  | 8.47255926 | 9.2596816  |
| ILMN_1784380 | 0.0304786  | 0.78341161 | 7.51467855 | 7.96905434 | 7.34826784 | 7.86767597 |
| ILMN_1784554 | 0.04595285 | 0.65621355 | 9.00299443 | 8.3614802  | 8.46976634 | 8.32159083 |
| ILMN_1785167 | 0.03527524 | 0.69430791 | 9.69643398 | 8.49505873 | 8.97683502 | 9.03225929 |
| ILMN_1785345 | 0.04711228 | 0.80414041 | 6.60259762 | 6.44660743 | 6.32831966 | 6.77765773 |
| ILMN_1785615 | 0.03294807 | 0.68078784 | 7.5982781  | 6.81359138 | 7.0720672  | 7.37416138 |
| ILMN_1785703 | 0.03204618 | 0.59856199 | 10.4080898 | 9.93522208 | 9.9257102  | 10.0150261 |
| ILMN_1786847 | 0.00946975 | 0.60642473 | 8.12042971 | 7.09074548 | 8.25753871 | 7.19666409 |
| ILMN_1787186 | 0.02839866 | 0.64341348 | 8.33599366 | 7.51482686 | 7.82764185 | 8.1990765  |
| ILMN_1787314 | 0.04706392 | 0.78177086 | 7.28966942 | 6.85258943 | 6.64169572 | 6.72909319 |
| ILMN_1787378 | 0.02743585 | 0.639343   | 9.98051235 | 8.92851423 | 9.20121064 | 9.55019307 |
| ILMN_1787808 | 0.03068515 | 0.67208946 | 10.347556  | 8.9766257  | 9.41396043 | 9.59312646 |
| ILMN_1787897 | 0.01317226 | 0.69570607 | 8.6052769  | 7.83879297 | 7.95739462 | 8.60244352 |
| ILMN_1788143 | 0.03425984 | 0.74749932 | 7.35704609 | 6.81147617 | 7.16091414 | 6.62367185 |
| ILMN_1788439 | 0.02716675 | 0.77971949 | 6.26979433 | 6.58296449 | 6.71625016 | 6.2800653  |
| ILMN_1788701 | 0.04740497 | 0.71525557 | 9.55544328 | 7.56950932 | 7.9156882  | 7.62307014 |



|              |            |            |            |            |            |            |
|--------------|------------|------------|------------|------------|------------|------------|
| ILMN_1790625 | 0.03910606 | 0.76299063 | 8.13315968 | 8.63534774 | 8.76957407 | 8.45689689 |
| ILMN_1790689 | 0.00517829 | 0.60528173 | 10.8749944 | 10.2657264 | 10.8474215 | 11.6453234 |
| ILMN_1790715 | 0.03834913 | 0.83643415 | 6.18703489 | 6.33286598 | 6.64582557 | 5.83193195 |
| ILMN_1790891 | 0.00703242 | 0.63119232 | 9.9306958  | 9.58562865 | 10.2352604 | 10.5538433 |
| ILMN_1790985 | 0.04901393 | 0.65119385 | 8.87508121 | 7.36046436 | 8.16545223 | 8.95772166 |
| ILMN_1791253 | 0.0078129  | 0.58920987 | 7.48090408 | 6.52625211 | 7.20893858 | 7.52332672 |
| ILMN_1791536 | 0.04423675 | 0.66030353 | 9.67023896 | 7.64657023 | 7.94199774 | 7.78235942 |
| ILMN_1792207 | 0.04825472 | 0.79038023 | 6.91256005 | 6.2867117  | 6.31577832 | 6.24607246 |
| ILMN_1792997 | 0.04642067 | 0.63940014 | 10.4700243 | 8.64886733 | 8.78465971 | 9.22820133 |
| ILMN_1793461 | 0.02940973 | 0.6210913  | 6.67039566 | 6.32057024 | 6.49576391 | 6.21460239 |
| ILMN_1794223 | 0.04412885 | 0.68083928 | 10.3500474 | 8.25953755 | 8.38936203 | 8.5540462  |
| ILMN_1794333 | 0.04462818 | 0.77314884 | 7.5614155  | 7.25167839 | 7.04294304 | 6.57236705 |
| ILMN_1795461 | 0.03893925 | 0.71402967 | 7.36692278 | 6.77181825 | 6.62844102 | 6.84006411 |
| ILMN_1796138 | 0.01968872 | 0.69396535 | 6.95375064 | 6.69619278 | 7.35704961 | 8.24944155 |
| ILMN_1796316 | 0.01063792 | 0.49972424 | 10.6776104 | 10.1267561 | 11.6561249 | 12.2401754 |
| ILMN_1796335 | 0.04311004 | 0.65858764 | 6.64412739 | 8.41862596 | 6.65146937 | 7.01050125 |
| ILMN_1796642 | 0.02288272 | 0.57283501 | 11.4640214 | 10.2998662 | 10.8969991 | 11.7085834 |
| ILMN_1797207 | 0.01881661 | 0.7407949  | 6.38462957 | 6.05179732 | 6.05261087 | 5.75152076 |
| ILMN_1797745 | 0.02634497 | 0.67312823 | 8.73046334 | 7.78079695 | 8.33997646 | 8.74720913 |
| ILMN_1797875 | 0.03585933 | 0.7155672  | 13.8352787 | 13.1469368 | 13.6912899 | 13.9161118 |
| ILMN_1798233 | 0.04845199 | 0.73773195 | 8.77269001 | 7.78192226 | 7.72217295 | 7.89829483 |
| ILMN_1798581 | 0.00593864 | 0.63486918 | 12.7663272 | 11.8254804 | 12.0279972 | 12.1063395 |
| ILMN_1798804 | 0.03901965 | 0.68114526 | 9.56862196 | 8.69552968 | 9.29140188 | 10.3701043 |
| ILMN_1799030 | 0.00715106 | 0.59068826 | 12.1977426 | 10.713536  | 11.3284034 | 12.0248336 |
| ILMN_1799106 | 0.04179542 | 0.64639203 | 9.01627038 | 8.7090128  | 9.27756429 | 10.2182823 |
| ILMN_1799644 | 0.01217579 | 0.60176589 | 9.33309742 | 8.40908369 | 9.51735405 | 8.92338394 |
| ILMN_1799848 | 0.01828948 | 0.62787298 | 7.69065874 | 7.91091611 | 7.34907241 | 7.91615893 |
| ILMN_1800638 | 0.02961955 | 0.74641136 | 10.0552296 | 9.35606676 | 9.61154256 | 10.2848831 |
| ILMN_1800695 | 0.03206478 | 0.82522497 | 5.94515094 | 6.17921962 | 6.15968206 | 5.73028834 |
| ILMN_1801216 | 0.01496856 | 0.5070089  | 11.7177201 | 10.8492338 | 12.3321854 | 10.9552845 |
| ILMN_1801776 | 0.01689787 | 0.67818632 | 7.42235328 | 6.71603335 | 6.85313486 | 6.6681475  |
| ILMN_1801866 | 0.04988812 | 0.80500975 | 6.60089993 | 6.9914901  | 7.23367815 | 6.4737848  |
| ILMN_1802096 | 0.03680355 | 0.72635799 | 11.6427065 | 10.8168677 | 10.7470533 | 11.4716646 |
| ILMN_1802348 | 0.04791188 | 0.73140149 | 7.8321267  | 6.73322146 | 7.5246326  | 7.57854931 |
| ILMN_1802758 | 0.02878836 | 0.64726546 | 9.30792459 | 9.40009236 | 9.72545846 | 10.0196435 |
| ILMN_1802799 | 0.02635078 | 0.77635704 | 9.02611534 | 9.58778558 | 9.51277009 | 9.51929284 |
| ILMN_1803500 | 0.02925383 | 0.7716853  | 7.46071062 | 6.49352069 | 6.75547248 | 6.96833733 |
| ILMN_1803953 | 0.03227583 | 0.71365198 | 10.9212035 | 8.51220674 | 9.04982378 | 9.27507365 |
| ILMN_1805104 | 0.01883709 | 0.7458432  | 7.36910262 | 6.88397998 | 6.87886142 | 6.98463492 |
| ILMN_1805668 | 0.02913686 | 0.72239003 | 13.1620668 | 12.526698  | 12.6391614 | 12.711573  |
| ILMN_1806122 | 0.03078035 | 0.6451768  | 9.79233497 | 8.92043802 | 9.55358226 | 8.70282963 |
| ILMN_1806224 | 0.03287129 | 0.7346874  | 6.79191433 | 6.25607317 | 6.48020549 | 6.23935871 |
| ILMN_1806999 | 0.03654815 | 0.69589108 | 7.81718578 | 7.28126705 | 7.36936877 | 7.91262412 |
| ILMN_1807003 | 0.02689459 | 0.73765361 | 6.65544343 | 6.99920292 | 7.61088901 | 6.97707266 |
| ILMN_1807529 | 0.01062232 | 0.6211844  | 11.6769197 | 10.9159951 | 12.1675119 | 12.780803  |
| ILMN_1809585 | 0.0071602  | 0.63282531 | 7.14420344 | 6.6858841  | 7.26468467 | 7.28090065 |
| ILMN_1809750 | 0.04402628 | 0.65824237 | 8.8906224  | 8.04855063 | 8.26648204 | 8.33374126 |
| ILMN_1810229 | 0.03304353 | 0.71740175 | 8.7465684  | 7.62647637 | 8.25024109 | 8.07100052 |

|              |            |            |            |            |            |            |
|--------------|------------|------------|------------|------------|------------|------------|
| ILMN_1811221 | 0.0408638  | 0.71370982 | 7.74780898 | 7.03672091 | 7.1630448  | 7.48400678 |
| ILMN_1811330 | 0.04464779 | 0.779333   | 7.36878581 | 6.36054618 | 6.7914781  | 5.99331432 |
| ILMN_1811608 | 0.0138339  | 0.75880595 | 6.78173345 | 6.40714622 | 6.56525017 | 6.2203404  |
| ILMN_1811616 | 0.03020277 | 0.80320578 | 7.56013256 | 6.80913787 | 7.33757195 | 7.0259944  |
| ILMN_1812105 | 0.01850934 | 0.67697696 | 10.724883  | 10.1537332 | 10.0793541 | 10.2817238 |
| ILMN_1812571 | 0.02109215 | 0.74257288 | 9.32507335 | 8.15668785 | 8.90908603 | 8.87022476 |
| ILMN_1812640 | 0.02405475 | 0.72366837 | 12.013381  | 11.5347503 | 11.2585802 | 11.5038392 |
| ILMN_1812856 | 0.04442435 | 0.8091471  | 8.95048795 | 8.15831986 | 8.08821529 | 8.21827891 |
| ILMN_1813139 | 0.00943211 | 0.70710146 | 8.33039795 | 6.71299877 | 7.46023635 | 6.53805232 |
| ILMN_1813455 | 0.01062909 | 0.70669942 | 8.55923826 | 8.39547844 | 8.54712512 | 8.24024229 |
| ILMN_1813746 | 0.04019327 | 0.73940812 | 8.52828883 | 7.62712455 | 7.86875281 | 7.18475834 |
| ILMN_1814039 | 0.01652675 | 0.66746337 | 11.9413389 | 10.6425779 | 10.538351  | 11.3015271 |
| ILMN_1814153 | 0.04993095 | 0.81693982 | 6.66296311 | 5.91334039 | 6.41589097 | 6.04869764 |
| ILMN_1814204 | 0.01593455 | 0.7064202  | 13.7470464 | 12.8582635 | 12.9858026 | 13.3815565 |
| ILMN_1815121 | 0.02723987 | 0.77230106 | 6.84662369 | 7.14425954 | 7.25573204 | 7.16193201 |
| ILMN_1815578 | 0.03012795 | 0.70750039 | 9.69315221 | 9.35486248 | 8.612612   | 9.4601067  |
| ILMN_1815668 | 0.01820735 | 0.65800904 | 8.79033742 | 8.18578727 | 9.24392656 | 9.11104175 |
| ILMN_1816732 | 0.01095392 | 0.816986   | 6.36119952 | 6.36799198 | 6.48422532 | 6.22183185 |
| ILMN_1818346 | 0.02814533 | 0.60333514 | 8.40880568 | 8.9697897  | 8.43970873 | 8.39771099 |
| ILMN_1818621 | 0.03569277 | 0.83624447 | 6.29919043 | 6.32753378 | 6.19685251 | 6.20697819 |
| ILMN_1819313 | 0.04180983 | 0.7372267  | 6.9818595  | 7.47674458 | 7.73628083 | 7.40711988 |
| ILMN_1820160 | 0.04551196 | 0.8513076  | 6.22536807 | 5.99316349 | 6.17882875 | 5.52245724 |
| ILMN_1820302 | 0.04813147 | 0.82337135 | 6.656299   | 6.14223718 | 6.347121   | 6.17211983 |
| ILMN_1821042 | 0.03250955 | 0.79028422 | 6.46118621 | 6.52846396 | 7.03047403 | 6.65558081 |
| ILMN_1821887 | 0.02615189 | 0.76249494 | 6.51823644 | 6.4441517  | 6.80531826 | 6.32357886 |
| ILMN_1822005 | 0.04771273 | 0.8630624  | 6.07049044 | 5.89729295 | 5.89173948 | 5.60598672 |
| ILMN_1823533 | 0.0126724  | 0.76283529 | 6.82660823 | 6.54705353 | 6.47643305 | 6.50417449 |
| ILMN_1823543 | 0.01780721 | 0.71262235 | 7.44600225 | 7.12884087 | 7.66601517 | 7.9714901  |
| ILMN_1824666 | 0.04795528 | 0.80947393 | 6.44676489 | 6.51550321 | 6.48872371 | 6.41671664 |
| ILMN_1824898 | 0.04413627 | 0.70001396 | 7.81576241 | 7.31734297 | 7.37200223 | 7.15960194 |
| ILMN_1825186 | 0.04559145 | 0.83672596 | 6.4377326  | 5.98381858 | 6.12422411 | 5.51881931 |
| ILMN_1825233 | 0.02115388 | 0.82931764 | 6.57258579 | 6.11042589 | 6.2952655  | 5.83515352 |
| ILMN_1831158 | 0.005815   | 0.72307832 | 7.33018997 | 6.65833289 | 6.77522046 | 6.35011955 |
| ILMN_1833928 | 0.04290278 | 0.83854386 | 6.2182792  | 6.18904925 | 6.10042939 | 5.89854141 |
| ILMN_1835631 | 0.04362519 | 0.71555091 | 7.33160491 | 6.81762837 | 7.67996068 | 7.71077958 |
| ILMN_1835722 | 0.00671501 | 0.59894885 | 6.5679392  | 6.53444063 | 6.85368009 | 6.57961629 |
| ILMN_1837686 | 0.01556524 | 0.70561596 | 7.32829435 | 7.24857848 | 7.37837723 | 7.42743018 |
| ILMN_1839609 | 0.04115986 | 0.75393819 | 6.62059565 | 6.44130287 | 6.7970039  | 6.93273562 |
| ILMN_1846462 | 0.04895442 | 0.86430369 | 6.35049283 | 6.02134225 | 6.07627796 | 5.92439685 |
| ILMN_1846910 | 0.01435395 | 0.63193734 | 7.71249261 | 7.22764193 | 7.6101796  | 8.4517102  |
| ILMN_1847530 | 0.02734796 | 0.69806709 | 7.19186167 | 6.81236858 | 6.91842321 | 7.0559147  |
| ILMN_1850677 | 0.02950122 | 0.76378325 | 7.0017302  | 6.82609718 | 7.07275645 | 7.07303506 |
| ILMN_1853167 | 0.0077749  | 0.75888274 | 7.55112838 | 6.94425173 | 7.13140119 | 6.63814394 |
| ILMN_1853438 | 0.04262768 | 0.77016442 | 6.77951451 | 6.55893861 | 6.44542396 | 6.46604595 |
| ILMN_1854183 | 0.04459308 | 0.84611768 | 5.9351061  | 5.87423187 | 5.96652922 | 5.49525289 |
| ILMN_1855286 | 0.03291709 | 0.75364754 | 7.27299176 | 6.805157   | 6.88538645 | 6.44652506 |
| ILMN_1855791 | 0.04529562 | 0.84468658 | 6.14206498 | 6.0938707  | 6.00735407 | 5.45231472 |
| ILMN_1856070 | 0.04556333 | 0.67996538 | 6.67769991 | 6.93589461 | 7.62967063 | 7.96929672 |

|              |            |            |            |            |            |            |
|--------------|------------|------------|------------|------------|------------|------------|
| ILMN_1856459 | 0.04162967 | 0.75957552 | 6.40789145 | 6.33575549 | 6.48221777 | 6.21604155 |
| ILMN_1857413 | 0.023415   | 0.69525159 | 6.70763798 | 6.77187238 | 6.99831061 | 6.64656015 |
| ILMN_1860735 | 0.03043853 | 0.79453188 | 7.0835857  | 6.40110718 | 6.63930742 | 6.47794668 |
| ILMN_1863656 | 0.02918945 | 0.76871731 | 6.83615137 | 6.2847586  | 6.42585437 | 6.01333786 |
| ILMN_1864422 | 0.04664826 | 0.76974065 | 7.32047836 | 6.67007126 | 6.92235962 | 6.73687813 |
| ILMN_1864712 | 0.04759332 | 0.7325765  | 7.52018571 | 6.52684615 | 7.13442119 | 7.40807834 |
| ILMN_1866464 | 0.02648992 | 0.64713909 | 9.07474786 | 8.08855029 | 8.27621562 | 8.29565048 |
| ILMN_1867588 | 0.0123663  | 0.69085049 | 7.91181919 | 7.33864726 | 7.65180514 | 7.81850293 |
| ILMN_1869106 | 0.02632155 | 0.85046536 | 6.21607785 | 5.96237596 | 5.88248019 | 5.77246661 |
| ILMN_1870041 | 0.0280778  | 0.59274667 | 7.49593495 | 7.08599394 | 7.11387133 | 7.17317642 |
| ILMN_1870457 | 0.04074444 | 0.74951537 | 6.80860128 | 6.29659121 | 6.35293522 | 6.30054274 |
| ILMN_1870646 | 0.02856793 | 0.72529649 | 7.05890523 | 6.35790577 | 7.1728575  | 7.03210195 |
| ILMN_1872036 | 0.01080359 | 0.69131032 | 8.27402865 | 8.27232559 | 8.19019852 | 8.27492927 |
| ILMN_1873788 | 0.04724456 | 0.78441698 | 6.35499124 | 6.44087315 | 6.65413476 | 6.28735926 |
| ILMN_1879066 | 0.02559121 | 0.72575709 | 7.35564533 | 6.44604709 | 7.15346489 | 6.97378804 |
| ILMN_1880134 | 0.03567275 | 0.66995096 | 7.30157393 | 6.52205277 | 7.15983603 | 7.12951898 |
| ILMN_1880611 | 0.03174699 | 0.7577662  | 6.62260331 | 6.11093154 | 6.39903451 | 6.25139038 |
| ILMN_1883154 | 0.03642713 | 0.74258468 | 6.63108478 | 6.74012614 | 7.13697984 | 7.08269514 |
| ILMN_1883525 | 0.00901723 | 0.80190506 | 6.18836077 | 6.23282171 | 6.18663862 | 5.95910591 |
| ILMN_1883732 | 0.04630286 | 0.85137522 | 5.94782954 | 5.87401935 | 5.90342228 | 5.44523606 |
| ILMN_1884015 | 0.04195862 | 0.84550564 | 6.4163439  | 5.74202885 | 5.83448698 | 5.57000017 |
| ILMN_1884193 | 0.01252282 | 0.72370806 | 7.03356616 | 6.5912321  | 7.01093086 | 6.96997355 |
| ILMN_1887093 | 0.04826435 | 0.83489617 | 6.20326753 | 5.90748751 | 5.83800327 | 5.51963279 |
| ILMN_1888392 | 0.04402327 | 0.80450584 | 6.52814886 | 6.35007658 | 6.6910665  | 6.38202097 |
| ILMN_1888504 | 0.03605075 | 0.84509748 | 6.10288233 | 6.03310117 | 6.07654969 | 5.69023773 |
| ILMN_1890989 | 0.03843611 | 0.76837348 | 6.18715172 | 5.76669825 | 5.91602012 | 5.70380476 |
| ILMN_1896967 | 0.04161309 | 0.68343908 | 7.48232315 | 6.97316697 | 6.74518085 | 7.50718493 |
| ILMN_1898453 | 0.01101381 | 0.66172582 | 7.08590261 | 6.79381397 | 6.95813391 | 6.17963465 |
| ILMN_1899629 | 0.04126294 | 0.83874599 | 6.45057569 | 6.19542457 | 6.22708199 | 5.92762415 |
| ILMN_1900263 | 0.0238475  | 0.70147798 | 7.87877867 | 7.2895643  | 7.17871165 | 6.52575538 |
| ILMN_1902251 | 0.02132747 | 0.71450017 | 7.22980708 | 6.68973945 | 7.25381913 | 7.11069314 |
| ILMN_1902594 | 0.03996881 | 0.82689736 | 6.55692428 | 6.17292229 | 6.61308354 | 6.57282087 |
| ILMN_1903159 | 0.02990212 | 0.64268008 | 9.35815952 | 7.72009784 | 8.42641447 | 8.72684177 |
| ILMN_1907834 | 0.01470141 | 0.72355167 | 6.51152528 | 6.24727664 | 6.55107191 | 6.38009668 |
| ILMN_1910550 | 0.01003398 | 0.79205029 | 6.91368769 | 6.65906828 | 6.91895623 | 6.42634159 |
| ILMN_1911719 | 0.02403035 | 0.74499229 | 6.75927969 | 6.468669   | 6.77012867 | 6.65301414 |
| ILMN_1912083 | 0.03703453 | 0.74140649 | 6.97179873 | 6.30810873 | 6.59015781 | 6.64035413 |
| ILMN_1912662 | 0.02780781 | 0.60628383 | 9.31284167 | 8.74599291 | 8.5383461  | 8.40448636 |
| ILMN_1914473 | 0.01568292 | 0.67435412 | 7.76571905 | 6.48019871 | 6.95230095 | 6.72152168 |
| ILMN_1914800 | 0.0350841  | 0.63456296 | 7.23172712 | 6.57244239 | 6.76920973 | 7.00921839 |
| ILMN_1915031 | 0.0460836  | 0.83435836 | 6.30106922 | 5.97454124 | 6.07647936 | 6.00432363 |
| ILMN_1916292 | 0.01816967 | 0.47380096 | 7.02358139 | 6.41284773 | 6.81598395 | 6.69638477 |
| ILMN_2038776 | 0.00331489 | 0.69052448 | 12.2133597 | 11.7375068 | 12.332438  | 12.741946  |

| C181_NS    | C125_NS    | C205_NS    | C013_NS    | P019_NS    | C185_NS    | C195_NS    |
|------------|------------|------------|------------|------------|------------|------------|
| 13.4585092 | 13.3893934 | 13.6358043 | 14.1197858 | 13.2577877 | 13.3431288 | 12.8532698 |
| 7.32976585 | 6.827175   | 7.76274811 | 7.40573629 | 7.1054057  | 6.486507   | 6.91856155 |
| 7.59149018 | 7.53268631 | 7.16738503 | 7.20255779 | 6.64681069 | 7.11199842 | 6.63501878 |
| 6.92865339 | 6.12740382 | 6.10128995 | 6.76280191 | 6.51838013 | 6.84701349 | 6.25420229 |
| 7.25222546 | 6.8333683  | 7.15737018 | 7.32331422 | 7.1113068  | 6.2093241  | 6.05735994 |
| 7.50199    | 6.72804294 | 8.13002684 | 7.70986821 | 7.28354865 | 6.97145159 | 6.79127491 |
| 6.71307165 | 7.08999806 | 7.0250011  | 7.48991779 | 6.50522769 | 6.6537723  | 6.02043797 |
| 5.76570394 | 5.88514213 | 6.22308578 | 5.92362532 | 5.72270372 | 6.25511943 | 6.11082424 |
| 6.58765692 | 7.64270663 | 8.14783632 | 8.02772247 | 7.12595273 | 7.56175076 | 6.71731725 |
| 6.48637811 | 7.05096743 | 6.54648103 | 6.55791381 | 6.26504433 | 6.30956203 | 6.19393611 |
| 7.27060743 | 7.10391406 | 6.87295185 | 6.96559153 | 6.94484674 | 6.80234187 | 6.53158296 |
| 8.03825564 | 8.19837972 | 8.38461411 | 8.42699892 | 7.61594738 | 7.81340476 | 7.72750324 |
| 6.58098209 | 5.95512957 | 7.10799851 | 7.08615321 | 6.19645499 | 6.3688806  | 6.20222317 |
| 7.00672552 | 7.75136597 | 7.41351539 | 7.45537243 | 6.90992188 | 6.9251212  | 6.71871917 |
| 7.29910909 | 6.88333611 | 6.78515949 | 6.63902113 | 6.20236502 | 6.96961331 | 6.67539396 |
| 6.89765429 | 6.72156269 | 7.54998253 | 7.18895868 | 6.77645409 | 7.24193645 | 6.86774947 |
| 7.57510278 | 7.92411058 | 7.417369   | 7.5934225  | 7.1691313  | 7.22108825 | 6.77426127 |
| 8.09659605 | 7.92368997 | 7.75788266 | 7.69119634 | 7.33197118 | 7.4654856  | 6.88488482 |
| 5.30099091 | 5.56271683 | 5.67416288 | 5.40225557 | 5.5535694  | 5.78590752 | 5.51194584 |
| 5.98829136 | 6.17700725 | 6.4576176  | 6.12929023 | 6.09708992 | 6.34878445 | 6.0901012  |
| 7.71323115 | 7.7004529  | 8.43047346 | 7.28437717 | 8.00275371 | 6.80385859 | 7.15019002 |
| 5.50238566 | 5.80216012 | 5.82039548 | 5.45429238 | 5.39000967 | 5.44539631 | 5.43822265 |
| 7.65235025 | 8.188931   | 8.66673955 | 8.15800876 | 7.87406289 | 7.67689783 | 7.16100285 |
| 11.7938821 | 11.1543561 | 12.1200593 | 12.0057358 | 11.5795799 | 11.1335507 | 11.3465259 |
| 11.1055615 | 10.7873451 | 12.7055203 | 13.0177422 | 12.1269429 | 11.0074023 | 11.4899317 |
| 5.78888404 | 5.7615023  | 6.02033284 | 6.48715252 | 5.7178335  | 5.70382801 | 5.64274056 |
| 13.7183531 | 13.5399028 | 14.2680902 | 14.5248159 | 13.8254796 | 13.8654394 | 14.0460966 |
| 7.71236398 | 7.86823919 | 8.1191201  | 8.70633231 | 8.29147003 | 7.93701593 | 7.30836725 |
| 7.22269445 | 7.87642486 | 8.03481217 | 8.20941389 | 6.96999197 | 6.3149796  | 5.99627665 |
| 9.09940699 | 10.4234868 | 9.98265282 | 10.1347164 | 9.16339659 | 9.04379861 | 8.76779448 |
| 13.4243264 | 12.5379393 | 14.2085377 | 14.2784771 | 13.7027993 | 13.647681  | 13.8450264 |
| 12.4142529 | 12.4973579 | 12.7798878 | 13.03613   | 12.7049394 | 12.8275124 | 12.5771954 |
| 5.67245391 | 6.12110557 | 6.05603201 | 5.81757082 | 5.91281103 | 5.91759406 | 5.87900189 |
| 8.14467201 | 8.31131873 | 8.63973936 | 8.64222033 | 7.56703048 | 7.65340044 | 7.08403449 |
| 5.03814554 | 5.46400623 | 5.37082618 | 5.24710494 | 5.20341535 | 5.37514337 | 5.27929745 |
| 12.4033679 | 12.7099251 | 12.1033586 | 12.5283872 | 11.7442393 | 11.4159715 | 11.0397717 |
| 9.36599232 | 9.60453488 | 10.0802899 | 10.8087503 | 9.33756995 | 8.93949547 | 8.27000886 |
| 8.57925747 | 9.14991551 | 9.57580261 | 8.96764647 | 9.19039782 | 9.39515558 | 8.90997047 |
| 5.74131974 | 6.44466011 | 6.51413078 | 6.17362577 | 5.86928044 | 6.28265682 | 6.01658947 |
| 6.72779523 | 6.97180908 | 7.4129373  | 7.88592145 | 6.75467242 | 6.74792844 | 6.41572521 |
| 9.26021883 | 9.56210387 | 9.57166904 | 9.92242385 | 8.63710556 | 9.16923956 | 8.52851858 |
| 7.89794889 | 7.82942085 | 8.10171047 | 8.17521869 | 7.89426847 | 8.03193659 | 7.6112137  |
| 6.26491113 | 6.23005926 | 6.48654979 | 6.61100325 | 6.4849888  | 6.73463782 | 6.76840402 |
| 7.27344502 | 7.19930623 | 7.40070186 | 7.53894317 | 6.63389339 | 6.89112751 | 6.50238503 |
| 6.08472783 | 6.36689918 | 6.05068344 | 6.47095702 | 6.20532663 | 6.0566971  | 5.78854478 |
| 8.96412914 | 9.56946546 | 9.03110512 | 8.47811556 | 8.25409276 | 8.3302088  | 7.63439143 |
| 7.25254244 | 7.28070026 | 7.01490312 | 6.87914088 | 6.47379422 | 7.04244298 | 6.42970483 |

|            |            |            |            |            |            |            |
|------------|------------|------------|------------|------------|------------|------------|
| 7.3451586  | 7.68921388 | 7.53737917 | 8.0687455  | 6.82681794 | 6.92597094 | 6.31157069 |
| 5.93795473 | 6.44987778 | 7.42546014 | 7.28982064 | 6.89256589 | 7.02481388 | 7.04894563 |
| 9.78228143 | 9.08358729 | 10.0194003 | 10.12818   | 9.36735578 | 9.91216571 | 10.0097685 |
| 10.7068301 | 9.73318247 | 11.0602582 | 11.0172942 | 10.4589705 | 9.94722065 | 9.8939904  |
| 7.74934856 | 7.68939142 | 7.42016993 | 7.10179083 | 6.72980426 | 6.70720174 | 6.37308996 |
| 6.79481613 | 7.21732379 | 6.61773368 | 6.89602476 | 6.34761535 | 6.48015459 | 6.04456155 |
| 14.1517063 | 13.0902403 | 14.5143362 | 14.6126491 | 14.0624653 | 14.2092508 | 14.0936222 |
| 7.39122382 | 8.09055496 | 7.96471861 | 7.66179876 | 6.61888761 | 6.91593434 | 6.70546375 |
| 5.99848618 | 6.23120236 | 6.25375787 | 6.15231933 | 5.98393097 | 6.04677675 | 5.80794193 |
| 8.9406874  | 9.48392297 | 9.66410928 | 10.086476  | 8.77043826 | 9.43879996 | 8.78251243 |
| 5.45532788 | 5.87463174 | 5.91734343 | 5.67738646 | 5.61736167 | 5.78669019 | 5.7351406  |
| 7.53760436 | 8.10527998 | 7.90973531 | 8.22241046 | 7.19461504 | 7.30708967 | 6.8592428  |
| 9.22337018 | 9.8087681  | 9.56833542 | 9.92107373 | 8.97684848 | 8.77405235 | 8.92686495 |
| 6.93186386 | 8.02124318 | 7.76008785 | 7.94287748 | 7.12971988 | 7.05844963 | 6.89879122 |
| 7.3848226  | 7.94481687 | 7.78158594 | 8.352371   | 7.0459016  | 7.13331075 | 6.7269824  |
| 9.25245847 | 8.85202288 | 9.60781649 | 9.41733082 | 9.29738472 | 9.28665224 | 8.69999574 |
| 6.71368757 | 7.43588608 | 7.631666   | 7.02593241 | 7.05808591 | 6.94845251 | 6.56929725 |
| 6.46012067 | 6.05164769 | 6.26954769 | 6.1600275  | 5.81377529 | 5.81931206 | 5.60662581 |
| 7.36112177 | 7.77175223 | 7.68136352 | 7.60627861 | 6.85319351 | 6.49905195 | 6.49817841 |
| 9.66574006 | 9.84107886 | 9.87773551 | 10.1116182 | 9.35257802 | 9.43684269 | 8.8647235  |
| 6.51546568 | 6.45030366 | 6.91488498 | 6.77702644 | 6.46513994 | 6.18442234 | 6.06303434 |
| 11.5312084 | 11.7923568 | 11.9734527 | 11.9756427 | 11.37047   | 11.4651547 | 11.3576603 |
| 8.22259931 | 8.60429413 | 9.17862029 | 9.50151438 | 8.00298037 | 7.44538655 | 7.17458419 |
| 7.81811367 | 7.90718151 | 8.0201399  | 7.67003797 | 8.36039062 | 8.09243739 | 8.09207262 |
| 8.5580621  | 9.23775108 | 9.14972451 | 8.98436348 | 8.31112479 | 8.45201385 | 8.09942514 |
| 8.64968228 | 9.17734703 | 9.24782738 | 8.71083639 | 8.26837778 | 8.62074218 | 8.64947966 |
| 7.29663727 | 7.90726324 | 7.58792825 | 7.98166489 | 6.96950855 | 6.5146066  | 6.34199126 |
| 8.62526026 | 8.28037131 | 8.52788395 | 8.27528926 | 8.14655748 | 7.34732283 | 7.12303397 |
| 8.91600244 | 9.62051915 | 9.39488558 | 9.66969136 | 9.3217721  | 9.23021647 | 8.87328876 |
| 6.44960528 | 6.42222577 | 6.12208397 | 6.29709143 | 5.86362828 | 7.12964777 | 6.11541764 |
| 8.01419291 | 8.21575333 | 8.44284234 | 8.0429611  | 7.83001695 | 7.78278138 | 7.6859997  |
| 7.75389798 | 9.48960294 | 9.08429897 | 9.22567717 | 8.51867518 | 7.80185189 | 7.28024091 |
| 9.1960451  | 9.75387743 | 9.2554691  | 9.30701588 | 8.41563657 | 8.29426509 | 7.88053616 |
| 6.39051637 | 6.70304808 | 6.8195775  | 6.62410514 | 6.37505021 | 6.52185841 | 6.5812372  |
| 8.31525193 | 7.62461856 | 8.74140429 | 8.52550867 | 8.26280991 | 8.35160227 | 7.89534262 |
| 5.38805622 | 5.6087983  | 6.07153101 | 5.99244692 | 5.55610105 | 5.74275998 | 5.93784647 |
| 6.83377308 | 7.16175671 | 7.80813209 | 6.97429297 | 6.68332451 | 6.89476563 | 6.86884971 |
| 7.43896563 | 7.98760908 | 7.61937559 | 7.89060538 | 7.56375989 | 7.1226282  | 6.95345849 |
| 13.2432289 | 13.6212071 | 13.4338736 | 13.5736945 | 12.750001  | 12.5560553 | 12.0312415 |
| 10.2053436 | 10.0851989 | 10.3780726 | 9.97537654 | 9.54210634 | 9.96095892 | 9.13680968 |
| 5.32616519 | 7.99247331 | 8.02306125 | 7.9484636  | 5.37662518 | 7.21991872 | 7.1692987  |
| 8.82995196 | 8.97323758 | 8.93560619 | 9.17496412 | 8.42619136 | 7.68616573 | 7.28118172 |
| 6.50821772 | 6.85504661 | 6.80682283 | 6.90679682 | 6.52468604 | 6.63945388 | 6.50789277 |
| 8.71995312 | 8.89473017 | 8.44218837 | 8.84242201 | 9.11700901 | 8.72120072 | 8.56541858 |
| 8.0979768  | 8.59462468 | 8.6932674  | 9.08111243 | 7.87249882 | 7.40785917 | 6.90832416 |
| 6.27851618 | 6.41537537 | 6.51564733 | 6.81442609 | 6.17960142 | 6.08560672 | 5.77881308 |
| 9.17954763 | 8.75947179 | 8.42070429 | 8.71358688 | 8.34072916 | 8.07060132 | 7.41497269 |
| 6.55085604 | 6.11901082 | 5.87900311 | 5.99225316 | 5.75097597 | 5.90369028 | 5.48120561 |

|            |            |            |            |            |            |            |
|------------|------------|------------|------------|------------|------------|------------|
| 8.25698091 | 8.80997001 | 7.78684594 | 8.68552743 | 7.49692566 | 7.40078126 | 7.05214306 |
| 9.04022012 | 9.52648692 | 9.06684479 | 9.76898817 | 8.73856013 | 7.84606012 | 7.35892455 |
| 7.74266042 | 7.879416   | 8.19923751 | 7.74822237 | 7.3431093  | 6.75765802 | 6.6054967  |
| 9.21645123 | 8.79708433 | 8.69618722 | 9.04729735 | 8.46937116 | 8.8372971  | 8.1063656  |
| 11.9451508 | 12.482244  | 11.9093351 | 11.9840243 | 11.3366421 | 11.5563432 | 11.3966604 |
| 5.63079889 | 6.0832721  | 6.06665647 | 6.35052306 | 6.03908091 | 6.11849387 | 5.94330859 |
| 8.34103573 | 8.73375733 | 9.13160929 | 9.23346342 | 8.35165704 | 8.99706146 | 7.90466593 |
| 6.21425228 | 6.4741688  | 6.31494463 | 6.39513908 | 5.98546263 | 6.29283033 | 6.00431441 |
| 8.53828944 | 8.63492791 | 8.47029648 | 7.98842736 | 7.24540344 | 7.23733809 | 6.69481613 |
| 11.1623989 | 10.1009133 | 11.6950099 | 12.9042878 | 10.9254832 | 10.1554899 | 9.93609948 |
| 8.28210801 | 8.47684785 | 7.8566546  | 8.19456186 | 7.76093214 | 7.2301492  | 6.86373035 |
| 10.5158368 | 11.4787797 | 11.6919114 | 11.1115772 | 10.6739583 | 10.581805  | 10.125274  |
| 10.8858557 | 10.976514  | 11.0779212 | 11.0664418 | 10.250469  | 10.8128159 | 9.98200388 |
| 6.01788317 | 6.54246732 | 6.72070256 | 6.57789057 | 6.10515403 | 6.18572326 | 6.17745761 |
| 7.69733111 | 6.36441818 | 6.9012036  | 6.20909382 | 6.42998964 | 6.20963311 | 6.0795106  |
| 9.38093763 | 9.34212713 | 9.56647213 | 10.2347983 | 8.66838758 | 8.74117404 | 8.08915383 |
| 5.8536267  | 6.16237159 | 5.85351392 | 5.82989217 | 5.70770423 | 5.74853879 | 5.56143612 |
| 12.2206214 | 13.3432996 | 12.8641171 | 13.3175836 | 12.4570579 | 12.7059721 | 12.2684224 |
| 5.61088222 | 6.35724514 | 6.08699538 | 5.88737076 | 5.468827   | 5.67710283 | 5.57482964 |
| 9.67061376 | 9.89957384 | 10.1609278 | 11.5902188 | 9.89922851 | 10.0982795 | 10.7227264 |
| 10.6511028 | 11.5178854 | 11.5261192 | 11.7458226 | 10.163388  | 9.65964044 | 8.75908791 |
| 11.2262857 | 10.4946886 | 11.5362953 | 11.3296456 | 10.8321962 | 10.4489691 | 10.4973469 |
| 6.29178992 | 6.85339315 | 7.23355641 | 7.5401761  | 6.69458355 | 6.52504826 | 6.70367245 |
| 7.60127978 | 7.88525404 | 8.52178023 | 8.49374059 | 7.43705542 | 7.81749407 | 6.60293502 |
| 6.46478114 | 6.77956966 | 6.6712962  | 6.75804328 | 6.21463483 | 6.41480597 | 6.17490771 |
| 10.8132377 | 10.8372006 | 10.7122983 | 11.3575289 | 10.2262689 | 10.1905778 | 9.42397497 |
| 10.6895892 | 11.284613  | 11.0775228 | 11.2351173 | 10.2606232 | 10.0698149 | 9.94920428 |
| 7.75091329 | 7.41873389 | 8.71525231 | 8.7238186  | 8.23535705 | 7.73670769 | 7.51511634 |
| 7.1347446  | 7.70487542 | 7.64279542 | 7.29981062 | 7.00154669 | 6.91526752 | 6.44842609 |
| 11.0236088 | 11.5480474 | 11.4003645 | 11.2033364 | 10.4736368 | 10.2823413 | 9.56788137 |
| 5.90677542 | 6.57586322 | 6.65889981 | 6.52566816 | 6.29500462 | 6.35602211 | 6.16830908 |
| 7.7072977  | 8.06820646 | 7.90337094 | 7.77532122 | 7.35537841 | 7.75309304 | 7.1325532  |
| 11.1504867 | 11.3561086 | 10.9996499 | 11.8440537 | 10.4800752 | 10.0439842 | 8.95042555 |
| 7.3170951  | 7.57264566 | 7.55754258 | 7.67629209 | 7.46768054 | 6.99263589 | 6.3921649  |
| 7.32417605 | 8.25685593 | 7.73563455 | 7.09456018 | 7.32409952 | 6.63878313 | 6.20015375 |
| 12.1943059 | 12.7295041 | 12.8373256 | 13.2352176 | 12.0922986 | 12.0185    | 11.4110613 |
| 6.53851209 | 7.74349612 | 6.75588502 | 7.69966406 | 7.22474937 | 6.57701983 | 6.82811871 |
| 7.98532908 | 8.09934676 | 7.88243763 | 7.49074821 | 7.4034927  | 7.27196905 | 6.76603722 |
| 12.0042854 | 12.1524525 | 11.8128291 | 11.9114242 | 11.7284027 | 11.5054682 | 10.8238138 |
| 7.05009896 | 7.46973623 | 7.3389565  | 7.32828537 | 7.20707291 | 7.15406164 | 7.06829354 |
| 6.38361946 | 7.91666891 | 7.19131984 | 7.91827769 | 6.9954065  | 6.25816707 | 6.1319016  |
| 6.71299189 | 7.39571492 | 7.27864924 | 7.50943062 | 6.31583012 | 6.44687487 | 6.19305515 |
| 10.5961273 | 9.99166072 | 10.540193  | 10.7992209 | 10.2816646 | 10.9709155 | 10.6863972 |
| 13.3862896 | 13.3353736 | 13.924729  | 14.2819974 | 13.2758534 | 13.9012176 | 13.6675174 |
| 8.17799451 | 8.21487957 | 8.79731881 | 8.9774986  | 7.88521377 | 7.73970299 | 7.20796604 |
| 9.8507324  | 9.23595246 | 10.3103742 | 11.6038836 | 10.8048595 | 9.78715687 | 10.1301085 |
| 6.64959678 | 6.22567809 | 7.2850415  | 7.52836346 | 6.26090166 | 6.50639058 | 6.5682252  |
| 6.25258975 | 6.37714267 | 7.03480446 | 6.59742912 | 6.14633223 | 6.58700307 | 6.35776294 |

|            |            |            |            |            |            |            |
|------------|------------|------------|------------|------------|------------|------------|
| 6.51245731 | 6.52784964 | 6.48460783 | 6.67233765 | 6.51227746 | 6.44097545 | 6.37428434 |
| 9.07854659 | 9.17550938 | 9.64762301 | 9.98366915 | 8.82183201 | 8.44014619 | 7.65609302 |
| 11.9198585 | 11.3374764 | 12.0413334 | 11.5885207 | 11.2566699 | 10.2883055 | 10.6790279 |
| 13.6314602 | 13.8983898 | 13.8183565 | 14.4402456 | 13.3318827 | 13.4253562 | 12.516894  |
| 9.10814884 | 8.95058039 | 9.16496222 | 9.04992885 | 9.00386895 | 8.65934948 | 8.48767486 |
| 7.2105116  | 7.75371216 | 8.38874921 | 8.05272454 | 7.39006317 | 7.45331097 | 6.6139428  |
| 5.77123617 | 6.15182858 | 6.28258714 | 6.47146924 | 5.69823626 | 6.25055481 | 5.88146714 |
| 11.8790839 | 12.6890316 | 12.5445446 | 12.9786963 | 11.0189853 | 10.7923267 | 9.72059792 |
| 9.77957081 | 10.5401406 | 10.6158742 | 10.6363962 | 10.0439008 | 10.4568462 | 10.1844018 |
| 5.9546586  | 6.09155746 | 6.61108811 | 6.74778078 | 6.63003467 | 6.50113115 | 6.48457287 |
| 11.1649352 | 11.7007639 | 11.8658392 | 11.7296883 | 10.3498496 | 10.0792154 | 9.19046647 |
| 7.06618286 | 7.70812653 | 8.00813613 | 8.17077734 | 7.28835118 | 7.71502024 | 7.39326517 |
| 8.83307192 | 8.98098609 | 9.4271649  | 9.93255995 | 8.94089731 | 8.74791267 | 8.01571555 |
| 5.48196536 | 6.26397767 | 6.2740445  | 6.05591838 | 5.72286244 | 5.98461578 | 5.75799716 |
| 14.0396139 | 13.1895712 | 14.6029383 | 14.6222349 | 14.1514027 | 14.4285152 | 14.4444869 |
| 6.63003278 | 6.23799461 | 6.99094125 | 7.64289648 | 6.98495955 | 7.2028281  | 7.01900575 |
| 7.05062467 | 7.86785323 | 7.73376919 | 7.71412185 | 6.75907326 | 7.40411291 | 6.56148088 |
| 6.79154842 | 7.36751697 | 7.32385191 | 7.33299967 | 6.52136723 | 6.48987653 | 6.28619974 |
| 9.70324556 | 9.48173204 | 10.1532683 | 10.0674008 | 9.12286448 | 8.41238143 | 7.75338926 |
| 5.65758256 | 5.79326333 | 6.04444505 | 5.81041508 | 5.44789653 | 5.95943077 | 5.74434815 |
| 11.1897498 | 11.4616186 | 11.4981187 | 11.5402375 | 10.5710558 | 10.3838717 | 9.76467375 |
| 8.38117217 | 8.51941138 | 8.98379795 | 8.5517544  | 8.52563669 | 9.0099302  | 8.57504793 |
| 7.39362556 | 7.85385721 | 7.83731634 | 7.793747   | 7.18881729 | 7.28260475 | 6.79236604 |
| 6.72389299 | 7.1196861  | 7.08459688 | 7.2119895  | 6.16255548 | 6.38854517 | 6.1292049  |
| 6.63706838 | 7.11047705 | 7.24441426 | 7.04945761 | 6.65735418 | 6.72993746 | 6.20813894 |
| 7.05363704 | 7.29921809 | 7.51273256 | 7.73669416 | 7.45829669 | 7.23814866 | 6.97647591 |
| 13.973013  | 14.0942988 | 14.2558171 | 14.3688488 | 13.969338  | 14.0532522 | 13.9639834 |
| 6.42266275 | 6.0201817  | 6.26031364 | 6.2840273  | 5.59314966 | 5.88626431 | 5.64971518 |
| 6.73978736 | 7.0199665  | 7.31237021 | 7.31033558 | 6.5499696  | 6.94119789 | 6.64553883 |
| 5.44168764 | 6.37548347 | 6.38082588 | 6.4184089  | 5.6115513  | 5.91123546 | 5.77361214 |
| 12.8429839 | 13.2450762 | 13.4074537 | 13.7599745 | 12.6315975 | 12.7869163 | 11.9035268 |
| 8.84944889 | 8.13170368 | 9.20062524 | 8.88256266 | 7.2543172  | 7.84658358 | 7.73813618 |
| 6.97194125 | 7.28347271 | 7.64285028 | 8.01299711 | 7.05575964 | 6.47422024 | 6.4656859  |
| 5.32790038 | 6.17496462 | 6.71734741 | 6.38708367 | 5.80449736 | 6.52880071 | 6.34456276 |
| 5.67283405 | 6.16524429 | 6.07136904 | 6.00977645 | 5.85114511 | 5.98803271 | 6.0363875  |
| 11.075538  | 11.4377843 | 11.9235611 | 11.5004376 | 10.9532405 | 10.814359  | 10.151283  |
| 7.51669283 | 9.04467443 | 8.34553964 | 8.60250736 | 8.06054787 | 8.02637847 | 8.10393452 |
| 9.42521632 | 9.17600056 | 9.68203159 | 9.78460262 | 9.46513435 | 9.19254755 | 9.33379022 |
| 9.72359286 | 9.54125734 | 10.3305158 | 10.753363  | 9.64469614 | 8.53847453 | 8.144155   |
| 5.78352868 | 5.93525205 | 6.11546237 | 5.96500941 | 5.90221712 | 5.95980122 | 5.76480234 |
| 6.14934433 | 6.73347637 | 6.41192293 | 6.3768198  | 6.23531387 | 6.42766986 | 6.15086467 |
| 6.04529618 | 6.93781635 | 8.12150347 | 7.94519976 | 7.66030544 | 7.11762129 | 7.5375438  |
| 9.66827694 | 9.1582739  | 9.68409216 | 9.39893732 | 8.83137819 | 8.96178855 | 8.27799358 |
| 6.44087266 | 7.52425805 | 7.46829413 | 6.913921   | 6.69379777 | 6.47188246 | 6.3124784  |
| 9.11554233 | 9.46784211 | 8.59277245 | 8.72152476 | 8.72774657 | 8.40518445 | 8.02006321 |
| 8.7811551  | 8.62056222 | 8.91829141 | 9.01830535 | 8.05816819 | 8.02475128 | 7.86785076 |
| 7.29033962 | 7.74154047 | 7.72912379 | 8.14298364 | 7.28342641 | 7.4665064  | 7.29443971 |
| 5.47545848 | 5.7516019  | 5.9340883  | 5.81348339 | 5.71688831 | 5.85325765 | 5.77702591 |

|            |            |            |            |            |            |            |
|------------|------------|------------|------------|------------|------------|------------|
| 6.97556828 | 7.2936289  | 7.17994491 | 7.50853403 | 6.6275638  | 6.78561332 | 6.45378275 |
| 12.3366976 | 12.6804039 | 12.492745  | 12.8291178 | 11.9110391 | 11.3908649 | 10.8366256 |
| 10.5830715 | 10.7826715 | 10.9746447 | 11.6181441 | 10.3739766 | 9.94725529 | 9.31303947 |
| 13.822768  | 13.8872444 | 13.8230418 | 14.3866661 | 13.5703408 | 13.4089215 | 12.6689964 |
| 11.9243694 | 11.7690994 | 12.9033099 | 12.822138  | 12.1017778 | 11.7256683 | 11.1913609 |
| 10.1921806 | 8.53665014 | 10.0271499 | 10.6844436 | 9.27588611 | 8.82267662 | 8.78115149 |
| 11.9200108 | 11.1180696 | 12.5140707 | 12.2668507 | 12.150757  | 11.7361393 | 11.8819716 |
| 6.5485345  | 7.433628   | 7.50680582 | 7.04692099 | 6.78367142 | 7.02616155 | 6.8017006  |
| 6.78623564 | 7.05608925 | 6.94608632 | 7.16096959 | 6.65274174 | 6.88588181 | 6.66443591 |
| 7.58006406 | 9.51860084 | 8.39842178 | 9.42115743 | 7.51532374 | 7.41288143 | 8.47311962 |
| 8.77060278 | 9.13066734 | 9.43410422 | 9.64875088 | 8.3365378  | 8.18617913 | 7.39932322 |
| 12.8914807 | 11.329728  | 13.1059766 | 12.4562417 | 12.2699705 | 12.0873352 | 12.0043156 |
| 9.65101939 | 10.0014349 | 10.0673281 | 10.4732907 | 9.22874054 | 9.19924315 | 8.41064935 |
| 5.7265378  | 6.30703519 | 6.53040571 | 6.43391521 | 6.05875352 | 6.38243451 | 5.8484324  |
| 7.16310218 | 8.09705135 | 8.16890774 | 7.3386321  | 7.11876462 | 7.86618286 | 7.34981287 |
| 6.45162012 | 6.84438565 | 7.31405569 | 6.86745914 | 6.26780675 | 6.16619362 | 5.96138371 |
| 13.1051271 | 12.575811  | 13.4533504 | 13.4435963 | 13.033957  | 12.6694908 | 12.4522788 |
| 5.3875297  | 5.76290474 | 5.9707713  | 5.82699584 | 5.56245462 | 6.10230119 | 5.83909845 |
| 7.78159184 | 8.6954834  | 8.15828956 | 8.22170553 | 7.88282338 | 8.06440111 | 7.51035355 |
| 8.3013837  | 8.46977082 | 9.40207642 | 8.69196889 | 8.30655937 | 8.34579509 | 8.16115255 |
| 5.98685619 | 6.04931318 | 6.46607842 | 6.25301466 | 6.13822408 | 6.30186599 | 6.04246684 |
| 5.88596061 | 6.00576803 | 6.47667217 | 6.48001673 | 6.16231821 | 6.15072538 | 6.27365482 |
| 7.75112224 | 7.14257273 | 7.40998741 | 7.5103488  | 7.38992039 | 7.18493087 | 6.8455026  |
| 6.76680185 | 7.4342454  | 7.03640772 | 7.4129136  | 6.87413915 | 6.75156147 | 6.45741257 |
| 6.67893811 | 7.3790664  | 7.30655755 | 7.21371957 | 7.0228294  | 7.14620207 | 6.5390662  |
| 10.4507834 | 10.990811  | 10.8737009 | 10.8188905 | 10.7865678 | 10.6333576 | 10.0204522 |
| 10.1044245 | 10.1897097 | 10.7489132 | 10.8041165 | 9.45067021 | 10.0826853 | 9.18276876 |
| 10.1213418 | 11.3661441 | 11.0963785 | 11.3522018 | 9.46242191 | 9.42128117 | 8.52997356 |
| 8.55829175 | 8.96563481 | 8.68883776 | 8.51744775 | 7.98045836 | 8.01671081 | 7.61785972 |
| 7.97036708 | 7.71975775 | 8.33395677 | 8.35411403 | 7.49895449 | 7.49599889 | 7.23207166 |
| 11.9261955 | 11.8328497 | 11.5505814 | 11.4891992 | 11.0104987 | 10.9537716 | 10.2256003 |
| 5.85339265 | 6.1972161  | 6.47014246 | 6.29529967 | 5.72037944 | 5.94575493 | 5.68695203 |
| 8.96722165 | 9.33536624 | 9.99122988 | 9.8531528  | 9.79092937 | 9.59042874 | 8.80002043 |
| 8.49147514 | 8.47832026 | 8.61517717 | 8.3685523  | 8.24609973 | 8.39198076 | 7.74816198 |
| 7.18623807 | 7.25556682 | 7.07703573 | 7.13411927 | 6.62714381 | 6.34002899 | 5.96835991 |
| 6.33212215 | 6.27796709 | 6.47680257 | 6.7043837  | 6.20942997 | 6.38438609 | 6.10540109 |
| 8.7805811  | 9.68916006 | 9.4741677  | 9.31117794 | 8.6549614  | 8.85930307 | 8.78070445 |
| 10.8291178 | 10.4136248 | 11.3218221 | 11.1054319 | 10.0462987 | 10.1598335 | 9.93833549 |
| 14.3666405 | 14.0584214 | 14.0568104 | 14.6031378 | 14.1484798 | 13.8849155 | 13.7926642 |
| 11.112158  | 11.1710842 | 10.8801337 | 10.7752934 | 10.1886123 | 10.0221625 | 9.33649094 |
| 6.18776181 | 6.83867323 | 6.71699912 | 6.59516885 | 6.20530727 | 6.29660057 | 5.96628187 |
| 9.57983276 | 9.01597697 | 9.4913168  | 9.50875764 | 9.17830905 | 9.26776378 | 8.65699289 |
| 7.13735597 | 6.86172093 | 7.04897832 | 6.97178839 | 6.75843644 | 6.98481262 | 6.6227137  |
| 13.5682495 | 13.6428775 | 13.1709771 | 13.6072321 | 13.2662271 | 13.2694172 | 12.6943222 |
| 9.22509462 | 8.99425669 | 8.84121051 | 8.6440596  | 8.34296046 | 8.40412484 | 7.48674574 |
| 9.31713513 | 9.56950742 | 9.54732084 | 9.69370317 | 9.27014766 | 9.25630848 | 8.74292344 |
| 5.61055627 | 6.8312553  | 6.44515509 | 6.56520538 | 6.34625097 | 6.20716547 | 6.2342961  |
| 9.84342238 | 10.9700707 | 10.7009607 | 10.7825929 | 9.89203016 | 10.2261665 | 9.85070099 |



|            |            |            |            |            |            |            |
|------------|------------|------------|------------|------------|------------|------------|
| 6.13925521 | 6.67047497 | 6.99176672 | 7.09227405 | 6.48809994 | 6.51071449 | 6.26842728 |
| 14.4204741 | 13.914672  | 14.362839  | 14.7824193 | 14.4263119 | 14.4255497 | 14.210927  |
| 10.2239956 | 10.4364763 | 10.1632773 | 12.6706554 | 9.25837358 | 9.98808533 | 10.1388836 |
| 11.4189605 | 11.5980716 | 11.8673008 | 12.2787956 | 11.2669212 | 11.1047566 | 10.4869205 |
| 7.99202231 | 8.24378093 | 8.62067804 | 8.12550749 | 8.09211069 | 8.79069842 | 7.64828783 |
| 8.41120123 | 8.54961219 | 8.72858517 | 9.49044177 | 7.93036479 | 7.45317843 | 6.75819789 |
| 7.14830269 | 7.56177061 | 7.92236676 | 8.25309912 | 7.16910123 | 7.35282649 | 6.74135103 |
| 11.4108054 | 10.4276397 | 11.4223329 | 11.5618698 | 10.7752391 | 10.9674194 | 11.3346755 |
| 5.93479435 | 5.72862475 | 6.11679682 | 6.34008598 | 5.70771058 | 6.68475704 | 5.95500167 |
| 6.72054799 | 6.83542895 | 6.99925254 | 6.85113061 | 6.18831665 | 6.25076399 | 6.34567722 |
| 5.9145894  | 6.95183371 | 6.33949659 | 5.95614589 | 6.07774525 | 5.94305043 | 5.68313836 |
| 6.66513833 | 7.04585793 | 6.79033546 | 6.58282784 | 6.35632431 | 6.77681726 | 6.30605604 |
| 12.4457138 | 12.8402665 | 12.5860049 | 12.477479  | 11.8229926 | 12.380083  | 11.8985288 |
| 8.78238301 | 8.75563971 | 8.88635901 | 8.96186349 | 8.03693076 | 8.32058937 | 7.92476441 |
| 8.01195066 | 8.2143881  | 8.80071227 | 9.02161908 | 7.7211115  | 7.64894641 | 7.40745983 |
| 9.84848039 | 10.8267161 | 10.572614  | 10.8850542 | 9.4765431  | 8.91171165 | 8.29237041 |
| 10.9586288 | 11.3350771 | 11.322287  | 10.9341368 | 10.3374736 | 10.5367222 | 9.60611572 |
| 5.72702979 | 5.83599353 | 6.54839686 | 6.23276896 | 6.24510524 | 6.13973777 | 6.37871744 |
| 9.65634137 | 9.94717915 | 9.7294039  | 9.6877088  | 8.722562   | 8.8538148  | 8.45073577 |
| 6.18507741 | 6.62584777 | 6.6762265  | 6.83172653 | 6.08423928 | 6.28415727 | 5.96090574 |
| 13.8478981 | 12.8375869 | 14.3003969 | 14.586373  | 13.8401731 | 13.6631945 | 13.8403    |
| 8.56483237 | 8.741528   | 9.23113548 | 9.83250335 | 8.65645812 | 8.43419827 | 7.91305934 |
| 5.82422712 | 6.14615135 | 6.85385471 | 6.15590544 | 5.94073338 | 5.86952475 | 5.63696503 |
| 6.97198951 | 6.81823448 | 7.32333584 | 7.25866496 | 7.30837089 | 7.22305951 | 6.93880683 |
| 12.4222498 | 11.2504281 | 13.3509185 | 13.5819843 | 12.7435552 | 12.3816595 | 12.3115684 |
| 8.98229173 | 7.44031357 | 9.33883085 | 8.65890731 | 8.39200481 | 8.63123891 | 8.18844296 |
| 5.57330878 | 5.65429289 | 6.08557146 | 6.06688999 | 5.85705563 | 5.99162229 | 5.86469849 |
| 5.53701427 | 6.49918369 | 6.98491854 | 6.89278322 | 5.4564221  | 6.30599787 | 6.26508897 |
| 7.97441574 | 8.33464023 | 8.02513347 | 8.51890057 | 7.5594421  | 7.15331186 | 6.81980484 |
| 8.6542583  | 8.97128977 | 8.98249796 | 9.07926103 | 8.50390562 | 8.45406482 | 8.24682989 |
| 8.65911074 | 7.33748543 | 9.57856384 | 8.70844937 | 8.00650001 | 8.30339446 | 7.95345674 |
| 5.6250612  | 5.94182771 | 6.29829045 | 6.01207674 | 5.74112016 | 5.70812763 | 5.76106476 |
| 8.38247835 | 8.72406153 | 8.85723209 | 8.55319767 | 8.99837803 | 8.32823599 | 8.95518056 |
| 6.96966626 | 7.46281879 | 7.71080643 | 7.0726107  | 6.75750602 | 6.90468279 | 6.39577729 |
| 8.12961016 | 8.15099928 | 8.13463937 | 8.41954437 | 7.64270157 | 6.86633435 | 6.68370066 |
| 6.89382572 | 7.17333934 | 7.40919998 | 7.55262914 | 6.71195325 | 6.58700712 | 6.48030342 |
| 6.97221474 | 6.56108383 | 6.57461426 | 6.34756999 | 5.91327097 | 6.06775293 | 5.92746036 |
| 6.4707363  | 6.47560229 | 6.43745181 | 6.34774236 | 6.16200293 | 6.03363752 | 5.72061228 |
| 9.57856177 | 9.43124414 | 9.88011964 | 9.75213139 | 9.1823432  | 9.14078045 | 9.10561104 |
| 10.2820749 | 10.7146036 | 10.2616636 | 10.8601846 | 9.96192511 | 9.30161028 | 8.76262953 |
| 6.3003176  | 6.65103159 | 6.96300008 | 7.06962914 | 5.88366871 | 5.95082275 | 5.65432354 |
| 5.75698083 | 6.55427695 | 6.33473666 | 6.25491655 | 5.94572544 | 5.93081633 | 6.03231005 |
| 7.07251638 | 6.86266587 | 7.1866709  | 7.17339631 | 7.14647601 | 7.41418121 | 7.18967831 |
| 5.94897852 | 7.05996089 | 6.9468174  | 6.87491374 | 6.32382561 | 6.57499701 | 6.25748044 |
| 5.56607931 | 6.04038793 | 6.01154797 | 5.68068808 | 5.53551988 | 5.85004128 | 5.57400914 |
| 12.5091022 | 12.1420078 | 12.8858879 | 12.8015633 | 11.7427153 | 11.5881913 | 11.1852199 |
| 9.01856269 | 8.19221883 | 9.65509454 | 9.88044769 | 7.94273441 | 7.13824108 | 6.92778389 |
| 8.81146718 | 9.34421623 | 9.27693465 | 9.32944655 | 8.79150935 | 8.39574019 | 8.20008252 |

|            |            |            |            |            |            |            |
|------------|------------|------------|------------|------------|------------|------------|
| 8.73699986 | 9.0705667  | 9.13406535 | 9.55068735 | 8.85910704 | 9.53007269 | 8.58565588 |
| 11.1286962 | 11.4009605 | 11.8170272 | 12.1488356 | 11.2401438 | 11.2065657 | 10.7277342 |
| 6.38339931 | 6.78994308 | 6.59679936 | 6.66329623 | 6.15181377 | 6.05121112 | 5.75732147 |
| 9.02616902 | 9.23726781 | 9.22180677 | 9.23026475 | 8.38682474 | 8.35804191 | 8.16819975 |
| 7.57016689 | 8.24650262 | 7.96100625 | 7.81959027 | 7.06378658 | 7.83763613 | 7.32104147 |
| 5.63668958 | 6.00982683 | 6.33017222 | 6.0914064  | 5.77278593 | 6.40937702 | 6.09413809 |
| 6.31932927 | 7.14079501 | 7.06725795 | 6.75683116 | 6.29265753 | 6.71286674 | 6.61761968 |
| 9.50478582 | 10.221511  | 10.1834431 | 9.82044258 | 9.66855901 | 9.93797064 | 9.61936294 |
| 8.80949484 | 9.11532696 | 8.93588636 | 8.78252619 | 8.60416698 | 8.00787273 | 7.67820433 |
| 6.17893011 | 6.393868   | 6.60443373 | 6.2538178  | 6.45025895 | 6.62147726 | 6.52974194 |
| 6.65361612 | 6.77676858 | 6.95394847 | 7.08981379 | 6.54480374 | 6.79852235 | 6.51725459 |
| 6.02540426 | 6.26118345 | 6.21712658 | 6.41659134 | 5.81462092 | 5.84338871 | 5.79919664 |
| 10.4381951 | 10.1495706 | 10.8316398 | 11.1644928 | 10.0904142 | 9.71854932 | 8.55598789 |
| 8.1124442  | 8.66567061 | 8.73424389 | 9.01377209 | 8.04627932 | 8.03064948 | 7.46116591 |
| 9.48118086 | 8.85094566 | 10.4226777 | 10.8718452 | 9.71426407 | 8.1368476  | 8.06294953 |
| 5.28391252 | 6.74923524 | 7.18776577 | 7.12940873 | 5.39397728 | 6.28825833 | 6.25937946 |
| 5.68854071 | 6.31717652 | 6.50311145 | 6.48886057 | 5.72171962 | 5.87317536 | 5.72562284 |
| 11.0338002 | 10.589506  | 11.1016448 | 11.2036973 | 11.0824917 | 10.2389075 | 9.94357737 |
| 8.74170056 | 8.62952602 | 9.20134225 | 9.23352909 | 8.37495904 | 8.85253856 | 8.00604944 |
| 11.6140569 | 12.0550851 | 11.968427  | 12.0066872 | 11.0967527 | 11.0772143 | 11.149803  |
| 6.69098831 | 6.16237481 | 6.74710001 | 6.07948777 | 6.55282492 | 6.95040776 | 6.01130151 |
| 5.50289639 | 5.66426323 | 6.03477828 | 6.05620828 | 5.73214626 | 6.03974487 | 5.89455587 |
| 13.9897608 | 14.2135113 | 14.0212689 | 14.5688557 | 13.5521179 | 13.58444   | 12.7940864 |
| 14.0822239 | 14.0886458 | 14.0371789 | 14.0639015 | 14.1028295 | 13.6242929 | 13.3029002 |
| 10.1538091 | 10.1088368 | 10.5132075 | 10.8359501 | 10.6647886 | 10.5030853 | 10.268956  |
| 5.91913673 | 6.18226423 | 6.3312423  | 6.32040814 | 5.76831456 | 6.18318238 | 6.0432255  |
| 7.41135167 | 7.88240523 | 8.08695463 | 8.32412518 | 7.36689743 | 7.00212753 | 6.97266049 |
| 6.62808386 | 7.12772716 | 6.8349387  | 7.15842186 | 6.60168582 | 6.70542366 | 6.68512301 |
| 7.68059301 | 8.17112625 | 8.03861286 | 8.09396153 | 7.36928587 | 7.04605991 | 6.64124471 |
| 6.15393299 | 6.34428472 | 6.19762049 | 6.38629915 | 5.96846313 | 5.92378741 | 5.92425289 |
| 12.2547355 | 12.9249696 | 12.7502148 | 12.3786563 | 11.881824  | 12.2673596 | 11.4554274 |
| 9.52334181 | 10.2180364 | 9.36356206 | 9.42293139 | 9.6834454  | 8.89121137 | 8.23573328 |
| 8.7811774  | 9.28765652 | 9.75599598 | 10.0254275 | 9.32828021 | 9.37928587 | 8.87234337 |
| 8.16230925 | 8.48428921 | 8.42741594 | 8.46994782 | 8.1720164  | 7.83410693 | 7.46264378 |
| 7.85060942 | 8.45942793 | 8.3784531  | 7.94097481 | 7.42688699 | 7.11645833 | 6.7635749  |
| 6.84697714 | 6.63557869 | 7.53826034 | 7.1696695  | 6.66202458 | 6.79597729 | 7.15752783 |
| 6.37313434 | 7.19242105 | 7.51087808 | 7.1797867  | 6.72918974 | 7.40008189 | 7.14913639 |
| 9.16591897 | 9.3499862  | 8.78645097 | 8.96611895 | 8.55246469 | 7.44007682 | 7.29375671 |
| 6.60659324 | 7.64459106 | 7.31614936 | 7.0701188  | 6.47427233 | 6.14461522 | 5.90124657 |
| 7.24977715 | 8.01330704 | 7.70817689 | 8.16490291 | 7.22282581 | 7.09063434 | 6.83735797 |
| 9.42537622 | 9.72571321 | 9.64470515 | 9.89367164 | 9.2977724  | 8.80557042 | 8.54051671 |
| 11.8419476 | 12.1215549 | 12.0443593 | 12.4345824 | 11.3807132 | 10.9148851 | 10.5205607 |
| 11.5819698 | 12.3099518 | 11.9284854 | 12.1772766 | 11.85267   | 11.4079629 | 11.1744495 |
| 9.19770275 | 9.48414317 | 9.67434977 | 9.46045672 | 8.03089332 | 7.696793   | 7.17376707 |
| 5.81842266 | 6.31518435 | 6.41758521 | 5.96510202 | 6.02007522 | 5.77904141 | 5.72923761 |
| 7.18279458 | 7.59073    | 7.45260944 | 7.4679674  | 6.25733127 | 6.59088042 | 6.42512525 |
| 9.21153865 | 10.014273  | 10.5114947 | 10.624726  | 9.38112522 | 8.92420413 | 10.1434228 |
| 7.54940349 | 8.41708118 | 8.06541183 | 7.80275157 | 7.39658595 | 7.5438678  | 7.76296531 |

|            |            |            |            |            |            |            |
|------------|------------|------------|------------|------------|------------|------------|
| 7.71919919 | 8.4055674  | 8.49274248 | 8.05073785 | 7.56563297 | 7.25393067 | 6.86510472 |
| 5.85366038 | 5.69471057 | 6.10072267 | 5.93274531 | 5.71690477 | 6.17411295 | 5.99774516 |
| 7.7442775  | 7.29363074 | 7.54323989 | 7.37695451 | 7.05118936 | 7.22645073 | 7.2310589  |
| 8.98590312 | 9.55837498 | 9.02424376 | 9.24514147 | 8.74042133 | 8.89692964 | 8.15958428 |
| 7.91585429 | 8.18831784 | 7.455148   | 7.42458035 | 7.59688074 | 7.7223253  | 7.09855641 |
| 11.6360844 | 11.7593431 | 11.8873981 | 11.3691556 | 11.4540273 | 11.3425731 | 11.1948449 |
| 5.38538099 | 7.38437365 | 7.48228523 | 7.74968309 | 5.65792263 | 7.5335361  | 7.16491698 |
| 7.67745468 | 8.28734439 | 7.71535116 | 7.46858413 | 6.94556674 | 7.28801612 | 6.94969484 |
| 11.8318503 | 12.5003104 | 12.5324468 | 12.8564497 | 11.0745155 | 10.9104134 | 10.1244975 |
| 11.7948861 | 12.1725541 | 12.1579131 | 12.8075246 | 12.5015036 | 12.1309936 | 11.5802397 |
| 5.46160615 | 7.0721444  | 8.00319519 | 6.62311565 | 5.975253   | 6.95728317 | 7.46247528 |
| 6.33203046 | 6.26946634 | 6.79527863 | 6.38674664 | 6.04557315 | 6.18854236 | 6.20768225 |
| 7.1545822  | 7.79362737 | 7.40649075 | 6.91422605 | 6.35504552 | 6.71772714 | 6.19841813 |
| 5.17153671 | 5.82646027 | 6.76835638 | 7.21434438 | 5.34398656 | 6.1399708  | 6.07564729 |
| 10.2230508 | 10.4028501 | 10.7879173 | 11.506799  | 10.3928047 | 9.97558863 | 9.36150717 |
| 9.34392431 | 10.9921602 | 10.6663714 | 10.3775218 | 10.3950167 | 10.6493119 | 9.68060338 |
| 9.99936868 | 9.79947818 | 9.36630604 | 9.85927169 | 8.73928917 | 7.98200045 | 7.72936991 |
| 9.18154786 | 9.41078946 | 9.29347142 | 9.26694134 | 8.62902433 | 8.21960998 | 8.40612548 |
| 8.41738884 | 8.74157721 | 9.00377621 | 9.55760538 | 8.06976982 | 7.85944099 | 7.19740052 |
| 12.5013272 | 12.966082  | 13.0769669 | 13.4853803 | 12.5719936 | 12.4416023 | 11.9293727 |
| 6.73528117 | 6.90483329 | 7.15850972 | 6.95489306 | 6.24407798 | 6.53956612 | 6.21640772 |
| 5.98910698 | 6.74415168 | 6.69299064 | 6.8421454  | 6.17863239 | 6.05384076 | 5.80950345 |
| 5.92313373 | 6.67396057 | 6.06569164 | 6.79501492 | 6.21923533 | 6.48820938 | 6.02316374 |
| 6.2602743  | 6.45231308 | 6.24293056 | 6.18188791 | 6.20512914 | 6.34577549 | 5.97376624 |
| 6.10794852 | 6.30465779 | 6.55851164 | 6.78697006 | 6.15662334 | 6.28865442 | 6.08792231 |
| 7.61004668 | 8.06456494 | 8.0438705  | 7.8593099  | 7.68622247 | 7.72363228 | 7.24165812 |
| 8.73625647 | 9.83431492 | 9.07275404 | 9.38944248 | 7.63525377 | 7.40471157 | 6.97719176 |
| 7.00331664 | 7.43999789 | 7.59736655 | 7.60635931 | 6.7702886  | 6.51882623 | 6.39014677 |
| 12.2344091 | 12.6320373 | 12.2666255 | 12.5705025 | 12.4340689 | 12.0262042 | 11.5554078 |
| 8.05754667 | 8.4651268  | 8.1443554  | 8.19082669 | 8.38258858 | 8.16099933 | 8.06263767 |
| 6.91031773 | 5.52215433 | 5.61943003 | 7.00544153 | 5.25769596 | 5.52200206 | 6.82586829 |
| 6.69121589 | 7.03796419 | 6.81461835 | 8.45565148 | 7.76305232 | 6.23079998 | 7.50737208 |
| 8.3342259  | 9.00606403 | 9.07331388 | 9.60178787 | 8.73190142 | 8.31222452 | 8.00890925 |
| 7.6245089  | 7.17549167 | 7.46660755 | 7.08272494 | 7.23238159 | 7.39680683 | 7.34508318 |
| 8.23092013 | 8.96095154 | 8.93797608 | 9.27859256 | 7.62729457 | 7.55930672 | 6.7977121  |
| 8.57647792 | 9.18488377 | 9.27333895 | 8.83800188 | 8.33289408 | 8.31596829 | 8.00839949 |
| 5.53016597 | 6.00067656 | 6.58959063 | 6.40664211 | 6.03404356 | 5.8101189  | 5.98410716 |
| 6.86522847 | 7.51593002 | 7.32342231 | 6.80691432 | 6.39190757 | 6.48071444 | 6.14646481 |
| 9.86696375 | 10.7594422 | 10.5726851 | 10.874392  | 9.20351955 | 8.84763494 | 7.91712619 |
| 8.35012503 | 7.97994073 | 9.05043204 | 8.52358587 | 7.46104555 | 8.08215011 | 7.32577855 |
| 8.25958745 | 8.99576065 | 7.96565501 | 7.58333103 | 7.76460094 | 7.41309645 | 7.41799762 |
| 6.47688615 | 6.53811318 | 7.1390192  | 7.36826898 | 6.55834509 | 6.21788017 | 6.10850919 |
| 9.20977184 | 9.63670545 | 9.43321883 | 9.74619417 | 8.58516537 | 8.32071572 | 7.81348365 |
| 10.0678215 | 10.037341  | 9.83116867 | 9.77217154 | 8.99602091 | 8.77333276 | 8.51272782 |
| 8.02980126 | 8.74035892 | 8.51460676 | 8.41098127 | 7.71477853 | 8.05512894 | 7.90671386 |
| 6.34272771 | 6.77486347 | 6.66673529 | 6.941543   | 6.66952147 | 6.49565775 | 6.29280291 |
| 5.82028365 | 5.84954847 | 6.20354515 | 5.76501194 | 5.68392772 | 5.96092334 | 5.77257534 |
| 6.96172055 | 8.27278419 | 7.84508102 | 8.14142666 | 7.14104852 | 7.05783256 | 6.86780382 |

|            |            |            |            |            |            |            |
|------------|------------|------------|------------|------------|------------|------------|
| 7.81105931 | 8.09018495 | 8.35851539 | 8.02803313 | 7.26747587 | 7.56675428 | 7.85406112 |
| 10.7070718 | 10.1798021 | 10.7528949 | 10.187362  | 10.2956943 | 10.0871459 | 10.0548064 |
| 5.79499621 | 6.14725988 | 5.90658784 | 5.92478686 | 5.5406293  | 5.93725705 | 5.69469358 |
| 9.67460948 | 9.77270567 | 9.71578031 | 10.0361874 | 9.70244942 | 9.10892062 | 9.08402306 |
| 8.04032918 | 8.27879    | 8.05589084 | 8.42434562 | 7.69530208 | 6.99084484 | 6.86046378 |
| 6.90538941 | 7.51622794 | 7.72029078 | 6.86492278 | 6.40583073 | 6.42195153 | 6.1245341  |
| 7.66357945 | 7.92175527 | 8.14063297 | 8.49335712 | 7.40865667 | 7.28898047 | 7.00768888 |
| 5.9621883  | 6.40235245 | 6.50332122 | 6.61407315 | 6.0278076  | 6.00263659 | 5.84835403 |
| 8.89404408 | 9.42443191 | 9.29962039 | 9.56789278 | 8.23802825 | 8.03425974 | 7.46238612 |
| 5.85799866 | 6.31342346 | 6.08030334 | 5.99799687 | 5.83176959 | 6.34702176 | 6.22006891 |
| 8.48874154 | 7.69098761 | 9.14361255 | 9.07209052 | 7.90614982 | 7.47258687 | 7.52926343 |
| 6.24707588 | 7.48656395 | 6.99269253 | 6.68486922 | 6.60415393 | 6.70657752 | 6.23618147 |
| 6.07864933 | 7.28188182 | 6.22138856 | 7.47719646 | 6.62772706 | 6.93275688 | 6.9424887  |
| 6.82891079 | 6.99328262 | 7.24945008 | 6.972317   | 6.84994298 | 7.18018168 | 6.52771579 |
| 10.7993213 | 11.2963203 | 11.081281  | 11.0418036 | 10.8111611 | 10.5531646 | 9.62026089 |
| 7.87320723 | 8.20039449 | 7.10150406 | 8.08399728 | 7.64931582 | 7.00834234 | 6.57741085 |
| 11.3665353 | 11.7412605 | 11.6016691 | 11.694673  | 11.0932254 | 10.1976037 | 9.83778702 |
| 5.4164341  | 6.25632193 | 6.41710263 | 6.28792067 | 5.52469089 | 6.15305401 | 5.98600629 |
| 8.64331796 | 8.78955712 | 8.5303244  | 8.59396921 | 7.91005444 | 7.91399757 | 7.2276275  |
| 13.2114252 | 13.1404885 | 13.62546   | 13.3435785 | 13.1963499 | 13.2585727 | 12.6418057 |
| 7.8524184  | 8.24079038 | 8.49450482 | 8.16677519 | 7.61878925 | 7.46384966 | 7.34606157 |
| 12.0041594 | 12.4211278 | 12.6607311 | 12.9118685 | 11.6861595 | 11.936961  | 11.1958631 |
| 9.08978228 | 9.32323179 | 9.40149864 | 9.76559176 | 8.87550978 | 8.83327215 | 8.00154556 |
| 11.4175915 | 10.7716991 | 12.138747  | 11.5622586 | 11.4679667 | 11.3122    | 11.0946682 |
| 9.09096587 | 9.61715226 | 9.1107195  | 8.40103778 | 8.56920017 | 8.90386558 | 8.41727574 |
| 8.8358644  | 8.89778708 | 8.55400437 | 8.7479714  | 8.43371145 | 8.15402517 | 7.70969179 |
| 7.4176728  | 6.82159798 | 7.32941874 | 7.04163944 | 6.65798435 | 6.40477696 | 6.52061334 |
| 9.33074527 | 10.1121827 | 9.86242876 | 9.69068719 | 9.12236885 | 9.90698737 | 9.07535025 |
| 5.4550352  | 5.6709992  | 5.58260357 | 5.64890543 | 5.55072986 | 5.5789689  | 5.60761853 |
| 12.0407414 | 12.1833547 | 12.7026959 | 12.615754  | 8.40968157 | 11.6481836 | 11.932775  |
| 6.21990072 | 6.64950481 | 6.89273344 | 6.71724047 | 6.67347728 | 6.23106063 | 6.05106991 |
| 5.96574574 | 6.3507877  | 6.49520187 | 6.53188437 | 6.12159091 | 6.3471366  | 5.97308911 |
| 11.1246655 | 11.7982936 | 12.0498982 | 12.2124271 | 11.6388029 | 11.4114575 | 10.6076382 |
| 6.63979145 | 7.49066238 | 7.62188923 | 7.6516839  | 6.78107902 | 6.50790989 | 6.37344637 |
| 9.28169895 | 9.94065466 | 9.84061524 | 9.44382232 | 8.59465081 | 9.06891636 | 8.51430101 |
| 8.7490961  | 9.09463539 | 8.67345254 | 9.24556625 | 8.91126644 | 9.32737951 | 9.14261127 |
| 6.63419261 | 6.68307742 | 6.90202412 | 6.91990732 | 6.76594177 | 6.91916248 | 6.60733623 |
| 9.27652807 | 8.78803801 | 10.2219133 | 9.97642665 | 9.28337779 | 8.87551254 | 8.96582872 |
| 6.21964618 | 7.37533576 | 7.24413451 | 7.12451839 | 6.64300374 | 7.01728614 | 6.56990086 |
| 12.6386165 | 13.0228772 | 13.1565943 | 13.6527643 | 12.5576221 | 12.2526323 | 11.6581718 |
| 8.60352954 | 8.42829065 | 8.64162261 | 8.18815066 | 8.47183573 | 8.41914361 | 8.03379354 |
| 6.00427014 | 6.39592446 | 6.09037076 | 6.33937437 | 5.54814991 | 5.96127002 | 5.67456488 |
| 7.46510842 | 7.9881359  | 8.63265174 | 8.53959194 | 7.92048089 | 7.83956221 | 7.47921358 |
| 6.76559707 | 6.97222278 | 6.58723371 | 6.6904576  | 6.51082951 | 6.42097447 | 5.87283221 |
| 12.0197335 | 12.085668  | 12.4991261 | 12.563972  | 11.6774796 | 12.0131    | 11.2420225 |
| 6.77383549 | 6.94083508 | 7.07791377 | 6.89584062 | 6.41008547 | 6.46986303 | 6.07714321 |
| 8.14182513 | 8.71028022 | 8.71350578 | 9.07759471 | 7.73351704 | 7.40316119 | 6.75542441 |
| 7.65698825 | 8.57656635 | 8.29889792 | 8.29231841 | 7.6289427  | 7.2074683  | 6.79798699 |

|            |            |            |            |            |            |            |
|------------|------------|------------|------------|------------|------------|------------|
| 7.36070753 | 7.7272568  | 7.80719068 | 7.89782489 | 7.0011582  | 6.55236816 | 6.21362374 |
| 6.02534778 | 6.78262873 | 6.64587311 | 6.64510214 | 6.14328178 | 6.24682172 | 6.16800976 |
| 5.8477875  | 6.45390586 | 6.51396204 | 6.19223836 | 5.99752117 | 6.03744987 | 5.71092405 |
| 6.89411686 | 7.22219983 | 7.36699532 | 6.98524653 | 6.82934727 | 7.3405685  | 6.65856997 |
| 10.2756962 | 10.6492005 | 10.8333179 | 11.3178371 | 10.0515679 | 9.70509875 | 9.23067016 |
| 8.72304005 | 8.22464182 | 8.62241794 | 8.64781924 | 8.60759626 | 9.15666459 | 8.75124645 |
| 11.5293105 | 11.7164144 | 12.102833  | 12.4698893 | 11.3799745 | 11.478436  | 10.9391906 |
| 8.11538497 | 7.86860652 | 8.55369303 | 8.47048481 | 8.00832665 | 8.26513821 | 8.28896018 |
| 6.3374312  | 6.39410303 | 7.14828235 | 7.36492518 | 6.84295747 | 6.70071297 | 6.44130303 |
| 8.78241446 | 8.64002472 | 8.03845374 | 8.23869182 | 7.86914346 | 7.70383853 | 7.43369726 |
| 7.52047018 | 7.84714193 | 8.17679299 | 7.9899831  | 7.46205968 | 7.62917226 | 7.32640252 |
| 11.2494773 | 11.190284  | 11.6185768 | 12.6087801 | 11.3579313 | 10.7724152 | 10.329793  |
| 5.29980036 | 6.38018692 | 6.02520048 | 6.37002614 | 6.1003642  | 6.56190438 | 6.30261334 |
| 13.1941452 | 13.61374   | 13.6133452 | 14.0875698 | 13.0999055 | 13.0552711 | 12.4340199 |
| 7.11451279 | 6.93401751 | 7.07359961 | 6.85768496 | 6.64117172 | 6.68345084 | 6.40519355 |
| 9.38119251 | 9.54608358 | 9.86029786 | 10.5048081 | 9.27266151 | 9.00394258 | 8.30542658 |
| 8.35378156 | 8.84161781 | 8.51623819 | 9.22247929 | 8.44462152 | 8.45724543 | 7.89486504 |
| 5.94188287 | 6.20939936 | 6.10571935 | 6.08525    | 5.97965224 | 6.35724144 | 6.16357521 |
| 9.06189498 | 8.63631285 | 8.64668902 | 8.29435102 | 7.51045167 | 7.42363783 | 6.85336196 |
| 5.81778056 | 5.89946472 | 5.91078542 | 6.12870912 | 5.96096572 | 6.26447976 | 5.88447387 |
| 7.01107179 | 7.51765207 | 7.26343541 | 7.11791733 | 6.62354457 | 7.16757269 | 6.19376406 |
| 5.59805429 | 6.10765753 | 5.96203719 | 5.63015498 | 5.55592625 | 5.77293976 | 5.53553885 |
| 5.58025887 | 5.81777519 | 5.95781526 | 6.16272022 | 5.86697695 | 6.18590103 | 5.94468255 |
| 6.37719231 | 6.17923176 | 6.31007359 | 6.30028666 | 6.11537623 | 6.36141554 | 6.02599573 |
| 6.27796244 | 6.35049336 | 6.47257696 | 6.28753084 | 5.88515726 | 6.03342322 | 5.7924811  |
| 5.34296891 | 5.73568247 | 5.60524689 | 5.6648702  | 5.42908465 | 5.52407214 | 5.62166598 |
| 6.43290798 | 6.60810857 | 6.6921733  | 6.31075782 | 6.01614193 | 5.98853655 | 6.0459955  |
| 7.84397694 | 7.85608372 | 7.75209559 | 7.82620779 | 7.33813913 | 7.33688141 | 6.62957782 |
| 6.2237245  | 6.50221761 | 6.34296446 | 6.21376292 | 6.12455871 | 6.0265573  | 5.9191446  |
| 6.97073749 | 7.44706586 | 6.88808445 | 6.96024526 | 6.40867875 | 6.25666198 | 5.97120463 |
| 5.46625775 | 5.70710205 | 5.7745317  | 5.71926039 | 5.6001389  | 5.71974803 | 5.49783939 |
| 5.57063506 | 5.95097061 | 6.02298449 | 5.88852652 | 5.67596804 | 6.16011183 | 5.92715051 |
| 6.11737796 | 6.44911909 | 6.98090957 | 6.86435455 | 6.30164855 | 6.44105382 | 6.01174966 |
| 5.49431128 | 5.7441506  | 5.81038012 | 5.49519307 | 5.60540455 | 5.64366632 | 5.68626772 |
| 7.83952946 | 8.28526164 | 7.41443071 | 7.71580073 | 7.02635745 | 6.93074562 | 6.42746957 |
| 6.18776438 | 6.52230391 | 6.56552102 | 6.58145505 | 5.91473959 | 5.95300234 | 5.76696586 |
| 7.42281074 | 7.69502223 | 7.24330634 | 7.20371016 | 6.62012817 | 6.74167192 | 6.28881828 |
| 6.6387924  | 6.48607123 | 6.18357703 | 6.29541723 | 6.00893435 | 6.26049073 | 5.92753147 |
| 5.64669349 | 5.87341138 | 5.8756324  | 5.79953782 | 5.79409662 | 6.00604326 | 5.83832329 |
| 7.71989051 | 8.18180126 | 7.88609039 | 8.00761488 | 7.27344129 | 7.35509557 | 6.71794917 |
| 6.23378052 | 7.40087773 | 7.03315977 | 6.48608314 | 6.67731514 | 6.6196975  | 6.21010867 |
| 7.50433198 | 7.2694222  | 7.06017604 | 7.28486573 | 6.57162433 | 6.82409318 | 6.33324893 |
| 6.5914845  | 6.27215946 | 6.97620208 | 6.83406647 | 6.99962688 | 7.22565476 | 6.90722238 |
| 6.46647916 | 6.59862425 | 6.18087647 | 6.14988265 | 6.09632069 | 6.03761548 | 5.75556888 |
| 5.19846665 | 5.50293521 | 5.40198536 | 5.21490502 | 5.45982765 | 5.51881553 | 5.40276958 |
| 6.15079341 | 6.64487005 | 6.48915803 | 6.35421517 | 6.01759571 | 6.18935946 | 6.22476692 |
| 5.49138527 | 5.69590726 | 5.56222105 | 5.35836321 | 5.48490053 | 5.57420326 | 5.63302427 |
| 6.7700639  | 6.38881361 | 6.87061748 | 6.80086238 | 6.4002399  | 6.09228187 | 6.04753185 |

|            |            |            |            |            |            |            |
|------------|------------|------------|------------|------------|------------|------------|
| 5.47454442 | 5.95672045 | 6.07625166 | 5.81380222 | 5.50880481 | 5.60331626 | 5.50804162 |
| 6.41600232 | 6.55804258 | 6.28742132 | 6.47124226 | 5.87675169 | 6.20917728 | 6.12767372 |
| 5.89576599 | 6.36874932 | 6.32389675 | 6.81968223 | 6.13344578 | 6.34507395 | 6.26526454 |
| 5.78215953 | 6.11899255 | 6.17391754 | 6.19999814 | 5.67473407 | 5.8062364  | 5.59740871 |
| 6.89445523 | 7.02092217 | 6.72365139 | 7.11020766 | 6.46508834 | 6.39578859 | 5.99577416 |
| 7.18268336 | 7.72223307 | 7.85478861 | 6.83089417 | 6.55924002 | 7.28043209 | 6.4880694  |
| 8.23433462 | 8.55445801 | 8.81329797 | 8.73767088 | 7.64362245 | 7.57575857 | 7.00957224 |
| 7.26136438 | 7.54000401 | 7.49174008 | 7.07874751 | 6.85491824 | 6.90323234 | 6.71634757 |
| 5.49242621 | 5.86753031 | 5.61727056 | 5.84699569 | 5.69151434 | 5.79289022 | 5.63884539 |
| 7.12545893 | 7.30445993 | 6.52827641 | 6.90494766 | 6.64253956 | 6.48876869 | 6.04672896 |
| 6.27289399 | 6.5655032  | 6.73807739 | 6.63977582 | 5.91254401 | 5.93225114 | 5.61158199 |
| 7.08961997 | 7.53234657 | 7.09809316 | 6.65141053 | 6.23719619 | 6.27914922 | 5.99608476 |
| 8.61341157 | 8.73136418 | 8.44103107 | 8.27149291 | 7.29658864 | 7.7843646  | 7.38889556 |
| 6.13510797 | 6.13369668 | 6.00100886 | 5.92007293 | 5.62302725 | 6.06179412 | 5.95950658 |
| 7.05431453 | 7.23669638 | 6.86260884 | 6.92146609 | 6.26285368 | 6.36702136 | 6.26219992 |
| 6.78367797 | 7.02968146 | 6.96530754 | 6.58868211 | 6.4867866  | 6.74479483 | 6.30558609 |
| 6.10442033 | 5.98429951 | 6.17617255 | 5.89369493 | 5.56608388 | 5.86433945 | 5.64894252 |
| 6.84930251 | 6.94123898 | 6.51613164 | 6.63010619 | 6.18578965 | 6.50334858 | 5.96415416 |
| 5.83821107 | 6.1983199  | 5.95617517 | 6.17391734 | 5.91733985 | 5.90810195 | 5.71168267 |
| 5.22376079 | 5.51963971 | 5.62094206 | 5.38055146 | 5.35409913 | 5.36923125 | 5.34647118 |
| 5.27331596 | 5.82148624 | 5.73224695 | 5.37981154 | 5.18610631 | 5.49458394 | 5.56931093 |
| 6.55525479 | 6.56259336 | 6.90269226 | 6.5441481  | 6.24363443 | 6.51215181 | 6.22888121 |
| 5.22159988 | 5.89581906 | 5.77835184 | 5.48986177 | 5.32182782 | 5.41365501 | 5.37768982 |
| 6.34718958 | 6.58126055 | 6.40131559 | 6.16426979 | 5.77061606 | 6.09682161 | 5.95549648 |
| 5.49761588 | 5.79136791 | 5.891478   | 5.64475384 | 5.49862618 | 5.5691824  | 5.61151648 |
| 5.36357095 | 5.4826831  | 5.83057326 | 5.5771599  | 5.64894482 | 5.61550311 | 5.65181145 |
| 7.67455669 | 6.88435249 | 7.51631226 | 7.29901015 | 6.70178884 | 6.48615492 | 5.95865061 |
| 7.01016777 | 6.74563265 | 6.49578996 | 6.39526147 | 6.12710538 | 6.11094114 | 5.94823919 |
| 5.56719647 | 6.1150449  | 6.1438548  | 5.7322977  | 5.83531676 | 6.00202962 | 5.79677632 |
| 7.18956268 | 7.12280522 | 7.36377032 | 6.99996731 | 6.33638016 | 6.29937765 | 6.05429564 |
| 7.14740338 | 7.20764399 | 7.19321486 | 6.67208019 | 6.23536558 | 6.47324921 | 6.22621854 |
| 6.12093021 | 6.38087747 | 6.32615387 | 6.07382623 | 6.12079649 | 6.40684122 | 6.10875151 |
| 8.10913277 | 8.57877421 | 8.67027738 | 8.71434169 | 7.51703155 | 7.98920885 | 7.42225992 |
| 6.13449614 | 6.72903471 | 6.58891922 | 6.27546546 | 6.3100145  | 6.06319875 | 5.66559885 |
| 6.62289595 | 6.40923019 | 6.95574056 | 7.02542863 | 6.49660344 | 6.83679393 | 6.59330895 |
| 6.18399597 | 6.56212838 | 6.21460394 | 6.21803076 | 5.78593131 | 6.04694238 | 5.82079702 |
| 6.08703443 | 6.58120375 | 6.7480828  | 5.95948085 | 5.84493871 | 6.21556329 | 5.61650474 |
| 8.4296122  | 9.11244967 | 9.13236349 | 9.50493357 | 7.95134184 | 7.57486369 | 6.95867219 |
| 6.21782086 | 7.21508059 | 6.85954224 | 6.94514766 | 6.64579675 | 6.82650527 | 6.09995601 |
| 7.43446394 | 6.87229812 | 7.00644278 | 6.83366937 | 6.11149565 | 6.50806033 | 6.3955816  |
| 5.81093095 | 6.0837714  | 6.17762245 | 5.63224873 | 5.53293811 | 5.67131376 | 5.46975348 |
| 7.13344331 | 7.38180335 | 6.61003989 | 6.20386968 | 5.88949618 | 5.94030819 | 5.69205917 |
| 11.979303  | 11.3127321 | 12.2150406 | 11.9152568 | 11.7353682 | 11.6704195 | 11.7510369 |

| <b>C185dup_NS</b> | <b>C238_NS</b> | <b>P010_NS</b> | <b>C078_NS</b> | <b>C016_NS</b> | <b>C074_NS</b> | <b>P003_NS</b> |
|-------------------|----------------|----------------|----------------|----------------|----------------|----------------|
| 13.1992291        | 12.9973796     | 12.9743375     | 13.1036073     | 14.4249319     | 14.4124607     | 13.8196412     |
| 6.32061663        | 6.10646474     | 6.85616156     | 6.83332276     | 8.69045237     | 8.01216917     | 7.31250454     |
| 6.86697225        | 6.57902639     | 6.85465773     | 6.85944658     | 7.85763147     | 7.8006301      | 7.78604218     |
| 6.67602476        | 5.86096056     | 8.07055516     | 5.98051663     | 7.93372547     | 8.37230267     | 8.68416792     |
| 6.06976854        | 6.3741499      | 7.88080489     | 6.66123797     | 9.45385973     | 8.39334498     | 9.16515071     |
| 6.7151301         | 6.60187922     | 7.61086318     | 6.81915595     | 8.8163069      | 8.48948473     | 8.86308265     |
| 6.33959404        | 5.95632411     | 6.92653677     | 6.32314071     | 8.01700992     | 7.91897829     | 8.22189883     |
| 5.85000401        | 5.96592462     | 5.7966193      | 5.99027214     | 6.44605867     | 6.39368596     | 6.51342932     |
| 7.31510245        | 6.55044821     | 7.16377444     | 6.43519419     | 8.70260387     | 8.46872545     | 8.54842892     |
| 6.17660682        | 6.09893659     | 6.28507425     | 6.23114071     | 6.92471632     | 6.9677842      | 6.90492599     |
| 6.4265318         | 6.4426876      | 7.0507607      | 6.75819523     | 8.0084275      | 7.77071873     | 8.52316947     |
| 7.73053535        | 7.57404775     | 8.48366223     | 7.35535903     | 9.17994267     | 9.02710289     | 9.29694717     |
| 6.02048331        | 5.756908       | 7.10396545     | 6.03351551     | 8.21614344     | 7.67300796     | 6.92069704     |
| 6.65942369        | 6.6312443      | 7.52646951     | 6.77337661     | 8.19837334     | 7.85330956     | 9.37703978     |
| 6.73528117        | 5.96610187     | 7.33211086     | 5.94242137     | 7.81755355     | 7.98953926     | 8.53945779     |
| 7.12222025        | 6.50191996     | 7.95065446     | 6.6677176      | 7.85569263     | 7.72670045     | 8.0303874      |
| 7.08863456        | 7.24571052     | 7.28929594     | 7.56556291     | 8.79710023     | 8.1201881      | 8.15473155     |
| 7.25933087        | 7.26224522     | 7.64822598     | 7.65970483     | 8.46254154     | 8.33919574     | 7.90479657     |
| 5.3547152         | 5.24155307     | 5.55299272     | 5.33050498     | 6.31087267     | 6.37972821     | 6.13675124     |
| 5.85175704        | 5.92616622     | 6.39370964     | 5.86592797     | 6.99149577     | 7.11631485     | 7.36782883     |
| 6.59066579        | 5.48181557     | 7.89656673     | 5.92988471     | 9.25368749     | 8.04792276     | 8.38584687     |
| 5.27668537        | 5.09887976     | 6.05141735     | 5.2771784      | 6.84310827     | 6.59076129     | 6.50298181     |
| 7.32507964        | 7.00990138     | 8.83205136     | 7.16674858     | 9.22570802     | 8.67386732     | 9.46168018     |
| 11.0186224        | 11.2298252     | 12.4308521     | 11.6295288     | 13.053839      | 12.9038702     | 13.2372153     |
| 11.1933714        | 10.8922377     | 11.2678641     | 10.4414181     | 13.5494779     | 13.6934314     | 13.0975321     |
| 5.29315011        | 5.61986224     | 5.90333044     | 5.40533075     | 7.05674825     | 7.00909855     | 6.56423365     |
| 13.8462416        | 13.4683568     | 13.6458408     | 13.1256363     | 14.7609122     | 14.8094953     | 13.9379531     |
| 7.65912823        | 7.02768819     | 8.03919818     | 7.49873115     | 9.21409833     | 8.18753172     | 9.50912931     |
| 5.9820695         | 5.71413944     | 7.16127199     | 6.05157287     | 9.35958179     | 9.26974618     | 9.17377881     |
| 9.38748834        | 8.23996411     | 9.30756878     | 8.61158774     | 11.2379497     | 10.9801389     | 10.9282711     |
| 13.8166317        | 13.4302801     | 13.7048871     | 13.3462201     | 14.7745549     | 14.8083961     | 14.2626043     |
| 12.6702544        | 12.6068984     | 12.8165721     | 12.4380974     | 13.4110157     | 13.7897394     | 13.5325739     |
| 5.52438312        | 5.52878602     | 5.98233857     | 5.57772489     | 6.52812322     | 6.52068122     | 6.72443336     |
| 7.33471932        | 6.99272992     | 7.63754359     | 7.21559221     | 9.36215512     | 9.30430819     | 8.91147049     |
| 5.1209358         | 4.96026936     | 5.08481519     | 5.03038376     | 6.17106188     | 6.26069678     | 5.91236149     |
| 11.4774466        | 10.9651566     | 12.7773441     | 11.4895595     | 13.4985949     | 13.1890491     | 13.1062992     |
| 8.95042788        | 8.61579183     | 8.73044738     | 8.82567625     | 11.3402446     | 11.4049712     | 10.3502143     |
| 9.15315197        | 8.83291944     | 9.5631587      | 8.56824991     | 10.0316847     | 9.84432366     | 11.071693      |
| 5.97059831        | 5.8592428      | 6.14988082     | 6.16002488     | 7.0967394      | 6.79382177     | 6.81381197     |
| 6.59862634        | 6.47852        | 6.60270495     | 6.41502121     | 8.22633608     | 8.14378165     | 7.77490432     |
| 9.11508164        | 8.53862119     | 9.32158744     | 8.43922501     | 11.1501249     | 10.2598868     | 10.6088591     |
| 7.4783506         | 7.70075874     | 8.38076494     | 7.57970739     | 9.10701694     | 9.19758973     | 9.10168211     |
| 6.40084239        | 6.09882693     | 6.68996583     | 6.07719044     | 8.03736355     | 7.63759213     | 7.78646176     |
| 6.68289349        | 6.46928788     | 7.79170339     | 6.4249733      | 8.42461184     | 7.86586439     | 8.16743772     |
| 5.82640866        | 5.77354251     | 5.80712691     | 5.89270576     | 7.30834449     | 6.84949643     | 7.03250092     |
| 8.0899234         | 7.48127795     | 9.21360221     | 7.46611155     | 10.2101782     | 9.68046854     | 10.41299       |
| 6.68503047        | 6.40470476     | 7.30444351     | 6.70124407     | 8.13494221     | 7.96958683     | 8.06213197     |

|            |            |            |            |            |            |            |
|------------|------------|------------|------------|------------|------------|------------|
| 6.54454736 | 6.38054851 | 7.13587855 | 6.38238384 | 8.55138797 | 8.82145576 | 8.17073829 |
| 6.80152601 | 6.67327939 | 6.68118077 | 6.65404165 | 8.80137048 | 8.23624577 | 7.65769931 |
| 9.66513673 | 9.16190078 | 10.0755112 | 9.83405699 | 11.1212764 | 10.9527857 | 10.8205452 |
| 9.70271104 | 9.4016727  | 10.9431741 | 9.49851018 | 11.6220349 | 11.4766434 | 11.2249001 |
| 6.37004289 | 6.35843776 | 7.26835392 | 6.7167934  | 8.17975486 | 7.77866066 | 8.25501629 |
| 6.21987827 | 6.03821755 | 6.49869494 | 6.20089233 | 7.5675348  | 7.25420286 | 7.12510553 |
| 14.0705579 | 14.0540285 | 13.880654  | 13.9019209 | 15.1898562 | 14.9851984 | 14.6736514 |
| 6.79361761 | 6.46549164 | 7.57603985 | 6.59041384 | 9.34637943 | 8.68718985 | 9.12895631 |
| 5.70216964 | 5.59483754 | 5.76214441 | 5.5643989  | 6.77700144 | 6.81630146 | 5.96369144 |
| 9.30902062 | 8.71301939 | 9.51538012 | 8.51453812 | 10.2331379 | 10.7876635 | 9.98142029 |
| 5.52998675 | 5.51569574 | 6.0812951  | 5.36576811 | 6.60596169 | 6.38933621 | 6.62545651 |
| 7.01379498 | 6.98584308 | 7.60781705 | 6.88100625 | 9.0154368  | 8.28781717 | 8.5666329  |
| 8.62069197 | 8.80292278 | 10.0532784 | 8.80094454 | 10.9258882 | 10.275858  | 10.1898814 |
| 6.81706551 | 6.30698435 | 8.0727586  | 6.58831197 | 8.58054802 | 8.57596878 | 9.26496962 |
| 6.57441173 | 6.37831289 | 7.47324466 | 6.26625471 | 9.52320575 | 9.54911408 | 8.31506712 |
| 9.01560879 | 8.81474203 | 9.69521785 | 8.94083361 | 9.72322338 | 10.461108  | 11.1628495 |
| 6.51122101 | 6.2045778  | 7.35669669 | 6.59627132 | 7.9893752  | 7.55904052 | 8.2097024  |
| 5.50548257 | 5.73651504 | 6.70942161 | 5.94121056 | 7.38380796 | 7.15702754 | 6.74598753 |
| 6.15978134 | 6.35956387 | 7.32505625 | 6.18136259 | 8.44948131 | 8.67815749 | 8.45517143 |
| 9.39737537 | 8.82550263 | 9.97487343 | 8.61158221 | 10.3206866 | 10.4660132 | 9.96927427 |
| 6.0506151  | 5.74363318 | 6.45428103 | 5.93557101 | 7.8360472  | 7.83629089 | 7.68085739 |
| 11.4839478 | 11.1309926 | 11.8639152 | 11.146267  | 12.7774201 | 12.5816255 | 12.2956619 |
| 7.32650769 | 7.05776759 | 8.26293296 | 7.12536491 | 10.0496811 | 10.085013  | 9.87778136 |
| 7.8027477  | 7.9971456  | 8.892071   | 8.06873261 | 9.18412678 | 9.04092092 | 9.01090345 |
| 8.18803194 | 7.85449878 | 8.85383538 | 7.7996242  | 10.2451236 | 10.0605838 | 9.91685399 |
| 8.51371299 | 8.48496424 | 8.85692813 | 8.44105183 | 9.33743615 | 9.6621227  | 8.79975467 |
| 6.37533333 | 6.02205483 | 7.20361327 | 6.25654725 | 8.91576527 | 8.23770759 | 8.41946895 |
| 7.17483283 | 7.20503371 | 8.56620439 | 7.33933339 | 9.33890794 | 9.72245168 | 9.86264604 |
| 9.2597395  | 8.86974898 | 9.29116471 | 8.75240072 | 10.2562582 | 10.5651249 | 10.379726  |
| 7.08452141 | 5.54214319 | 6.47719711 | 5.87380902 | 7.84383314 | 7.14954899 | 7.27100914 |
| 7.61037599 | 7.41598086 | 8.36636681 | 7.71480943 | 9.64783758 | 9.38911031 | 10.1630987 |
| 7.57540159 | 7.2076518  | 8.79770432 | 7.41160166 | 9.88496478 | 9.94320417 | 10.0521836 |
| 8.45106148 | 7.67133725 | 9.32601954 | 7.63691241 | 10.4019493 | 9.63699522 | 10.4554526 |
| 6.28461907 | 6.29129523 | 6.81276518 | 6.23903098 | 7.1006697  | 7.18562971 | 6.78957407 |
| 8.20252547 | 8.05386996 | 8.76366055 | 7.99209031 | 10.045271  | 10.4201866 | 10.6580776 |
| 5.45224717 | 5.51358991 | 5.76336164 | 5.57581967 | 6.50912796 | 6.48251273 | 6.31040684 |
| 6.6171117  | 6.55186542 | 7.28133475 | 6.609626   | 7.61507195 | 7.5391177  | 8.44732462 |
| 6.904077   | 6.79669379 | 7.2763608  | 7.18120196 | 8.57659016 | 8.04644741 | 8.43371354 |
| 12.5523771 | 11.8933205 | 13.4507331 | 12.1345858 | 14.4382506 | 14.6302432 | 14.1795515 |
| 9.68669836 | 9.29616829 | 10.1190903 | 9.65128315 | 11.0552309 | 10.994004  | 11.6559175 |
| 6.95383908 | 6.8181859  | 5.31262851 | 6.72688434 | 8.26264174 | 8.14970089 | 6.0348784  |
| 7.53300105 | 7.20885764 | 8.79946976 | 7.34095298 | 10.1233092 | 10.179526  | 10.1394759 |
| 6.50639137 | 6.32069533 | 6.94068476 | 6.33785753 | 7.94831992 | 7.5342702  | 7.32568862 |
| 8.58194472 | 8.27948198 | 9.55448237 | 8.26083864 | 9.72784185 | 9.49114119 | 10.8283166 |
| 7.12039549 | 6.6671229  | 7.76886647 | 6.51437353 | 9.89473835 | 10.2270202 | 8.99501692 |
| 5.68774995 | 5.62669173 | 6.63006745 | 5.89050652 | 7.76855223 | 7.98551238 | 8.04760382 |
| 7.95661661 | 6.90154997 | 9.09387414 | 7.06015009 | 9.48425013 | 8.45380769 | 8.55537061 |
| 5.57915812 | 5.2115095  | 6.23901398 | 5.23648497 | 7.26588036 | 6.83243309 | 6.59811654 |



|            |            |            |            |            |            |            |
|------------|------------|------------|------------|------------|------------|------------|
| 7.17849356 | 6.43004252 | 7.38879656 | 6.98217448 | 8.59787676 | 8.64283621 | 7.92722566 |
| 7.71596336 | 7.17859116 | 8.76369473 | 7.18223145 | 10.1867989 | 10.1795919 | 10.2358383 |
| 6.55043744 | 6.63685819 | 8.6254042  | 7.38964252 | 9.9537083  | 9.14066722 | 9.74783767 |
| 8.68957838 | 8.77841197 | 9.11789266 | 8.38064591 | 10.4343624 | 10.1430439 | 10.4964134 |
| 11.6423613 | 11.4864192 | 12.7284046 | 11.5779589 | 13.3739554 | 13.1027214 | 13.0217762 |
| 5.65997421 | 5.69457686 | 5.86690551 | 5.55466927 | 6.84894086 | 7.08869815 | 6.2851673  |
| 8.64011295 | 8.28798197 | 8.6685794  | 7.38498315 | 9.54470697 | 9.57875327 | 8.87929039 |
| 5.75170178 | 5.92827769 | 5.91792745 | 5.88063974 | 7.17142002 | 6.88094138 | 6.69895881 |
| 7.10250487 | 7.31775177 | 9.26978171 | 7.55034047 | 9.18753667 | 9.44608333 | 11.087901  |
| 10.2301273 | 9.43904337 | 10.8377068 | 8.47204377 | 13.5686972 | 13.0873301 | 12.2328679 |
| 6.79260551 | 6.45269163 | 7.69330992 | 6.58700217 | 9.00224007 | 8.95931895 | 8.56650771 |
| 10.485458  | 10.246085  | 11.0567908 | 10.6473955 | 12.0816369 | 12.3225206 | 11.4627139 |
| 10.7448725 | 10.3552322 | 11.4135703 | 10.9990825 | 12.3363757 | 11.9190689 | 12.8533563 |
| 6.03270809 | 6.26236907 | 6.51122829 | 5.80904523 | 7.31074273 | 7.62310599 | 7.14834133 |
| 5.82511856 | 5.98454834 | 7.57204457 | 6.44443202 | 7.18432295 | 7.55192431 | 7.38800781 |
| 8.3914219  | 7.88868907 | 9.03621786 | 8.14024746 | 11.1321212 | 10.4256251 | 9.79148152 |
| 5.43773709 | 5.55572844 | 5.57322242 | 5.44617946 | 6.45747265 | 6.620023   | 6.14247634 |
| 12.5620301 | 12.0024016 | 13.4305636 | 12.4199962 | 14.2032004 | 13.891741  | 13.9292085 |
| 5.38758484 | 5.42554759 | 5.5787718  | 5.6944033  | 6.12161536 | 6.72665686 | 6.17991625 |
| 9.95523593 | 10.9636815 | 10.0565388 | 9.39226246 | 11.9804845 | 12.3732964 | 12.1004028 |
| 9.48708413 | 9.03897275 | 10.2658928 | 9.35207301 | 12.5788335 | 12.5133104 | 11.9574235 |
| 10.2073841 | 10.414348  | 11.9943064 | 10.9088054 | 12.4096879 | 12.2546416 | 12.707894  |
| 6.28018095 | 6.23714628 | 6.75285829 | 6.36894431 | 7.56024875 | 7.48061735 | 8.47539744 |
| 7.60415808 | 6.96636125 | 7.88027533 | 6.29414467 | 9.26825004 | 9.17229799 | 9.55639359 |
| 6.06648749 | 6.02899474 | 6.61439153 | 5.9975914  | 7.55531385 | 7.77329287 | 6.87249267 |
| 10.1094272 | 9.70650154 | 11.1344661 | 9.65218602 | 12.0832117 | 11.827145  | 11.8430055 |
| 10.1416614 | 9.7794472  | 10.7750785 | 9.75538234 | 12.3369865 | 12.3606307 | 11.894684  |
| 7.28501837 | 7.22132901 | 7.91376486 | 7.39355263 | 9.30626315 | 9.04397819 | 9.00441684 |
| 6.62849847 | 7.20613525 | 9.23636681 | 6.87586114 | 8.26075727 | 8.48110919 | 10.6604818 |
| 10.3209709 | 9.70922963 | 10.9124193 | 9.45177427 | 12.4076491 | 12.2272886 | 11.2250851 |
| 6.10026663 | 5.81233136 | 6.39917691 | 5.88821136 | 7.37610368 | 7.39957188 | 7.19164358 |
| 7.46382596 | 7.16713811 | 7.97269323 | 7.25688894 | 7.70328623 | 8.08555478 | 8.43145373 |
| 9.90777668 | 9.26806028 | 11.7215935 | 9.73315484 | 12.88273   | 13.0275579 | 13.0347177 |
| 6.82634637 | 6.25041667 | 7.57803826 | 6.25773273 | 8.80410101 | 9.19220872 | 8.77357541 |
| 6.57152559 | 6.24192272 | 7.92654685 | 6.70194544 | 8.54836457 | 8.18507116 | 8.76418192 |
| 12.0082045 | 11.5305327 | 11.9221726 | 11.755206  | 13.8409284 | 13.9423789 | 13.2912067 |
| 6.30828114 | 6.35128715 | 7.2340874  | 6.63587669 | 9.03188009 | 8.80692978 | 10.3426636 |
| 6.97376509 | 6.68747087 | 8.00893782 | 6.99104673 | 8.56557281 | 8.20426008 | 8.10489381 |
| 11.2921122 | 11.0722298 | 11.7698205 | 11.1941948 | 12.7506053 | 12.5300249 | 12.824427  |
| 6.93301547 | 6.74544711 | 7.44398866 | 6.65107035 | 8.34758815 | 8.44125107 | 8.83593449 |
| 6.1439003  | 5.81338616 | 6.8546864  | 5.77911812 | 8.6747304  | 8.9306859  | 9.0611916  |
| 6.09714935 | 5.95795591 | 6.57107531 | 5.76035722 | 8.21487569 | 8.54068176 | 8.2112079  |
| 10.8172467 | 10.6226238 | 10.644572  | 10.0230405 | 11.4639749 | 13.1324719 | 10.8160549 |
| 14.0218068 | 13.5806249 | 13.8803498 | 12.9814861 | 15.0631869 | 14.9372809 | 14.2745987 |
| 7.56214013 | 7.10797446 | 7.70771942 | 7.55262146 | 9.65227908 | 9.81409358 | 9.0906616  |
| 9.54091438 | 9.48151995 | 10.1327799 | 9.11281818 | 11.2308371 | 12.2949268 | 11.1369578 |
| 6.17276692 | 6.05910323 | 6.69214819 | 5.95119868 | 8.06112814 | 8.63665507 | 7.06604505 |
| 6.39715983 | 6.22525661 | 6.65696966 | 6.07169125 | 7.55993685 | 7.70759933 | 7.29282039 |

|            |            |            |            |            |            |            |
|------------|------------|------------|------------|------------|------------|------------|
| 6.01908072 | 6.24762338 | 6.25987054 | 5.98259458 | 7.10813237 | 7.17672468 | 7.37497686 |
| 8.5199452  | 8.11200937 | 8.55471048 | 8.35433623 | 10.5652811 | 10.5802708 | 10.2245938 |
| 10.3991946 | 10.78005   | 11.1644978 | 10.1390294 | 12.2581871 | 13.0172601 | 11.9697304 |
| 13.2853503 | 13.0591496 | 13.5984666 | 13.1196454 | 14.9269459 | 14.9415681 | 14.1435148 |
| 8.41057346 | 8.63305988 | 9.26252994 | 8.44223607 | 9.37912988 | 10.0356363 | 9.78392297 |
| 7.27853867 | 6.73473807 | 7.65064682 | 6.45349338 | 8.96878687 | 8.74980776 | 9.20650062 |
| 5.86164526 | 5.78699017 | 6.15629326 | 5.53045784 | 7.39648748 | 6.77806136 | 6.56838954 |
| 10.6574775 | 10.2125146 | 11.2639053 | 10.5179134 | 13.6820202 | 13.7782414 | 12.6836561 |
| 10.182521  | 10.0197811 | 10.3265227 | 9.63391213 | 11.0572682 | 11.2503778 | 11.4079969 |
| 6.30005928 | 6.32596487 | 6.39905485 | 6.48460219 | 7.40194698 | 7.28040054 | 7.00005861 |
| 9.90657617 | 9.76334219 | 11.003995  | 10.0835046 | 12.8324359 | 12.779357  | 12.2136167 |
| 7.52254858 | 7.78053189 | 8.31638834 | 7.65574179 | 9.08705623 | 8.91144952 | 8.98525962 |
| 8.51991769 | 8.19791551 | 8.46424554 | 8.54278968 | 10.2852901 | 10.2998456 | 9.99861158 |
| 5.830144   | 5.69573108 | 5.96048854 | 5.53642161 | 7.13389843 | 6.85231102 | 6.64748721 |
| 14.3666419 | 14.171011  | 14.1802697 | 13.9800717 | 15.1523974 | 14.9591675 | 14.6466189 |
| 6.95219143 | 6.27564982 | 6.80590506 | 6.30383919 | 8.00288195 | 8.24325254 | 7.86862874 |
| 7.21455906 | 6.41150794 | 7.15745305 | 6.40632305 | 8.14722325 | 7.97900097 | 7.09080581 |
| 6.22304136 | 6.02138445 | 6.80069286 | 5.93946003 | 8.339022   | 8.02570158 | 7.92437429 |
| 8.15354089 | 7.76529671 | 9.34602721 | 7.91036451 | 10.6862528 | 10.3409038 | 9.01357057 |
| 5.7436566  | 5.51303336 | 5.85073518 | 5.613257   | 6.51396299 | 6.32297908 | 6.22100451 |
| 10.3976672 | 10.2623004 | 11.6715818 | 10.3164795 | 13.0089384 | 12.4062893 | 12.9766241 |
| 8.72963808 | 8.48850135 | 9.35385961 | 8.65628971 | 9.68919781 | 10.1630169 | 10.0388299 |
| 6.86191816 | 6.72889463 | 7.51127906 | 6.90568665 | 8.52747935 | 8.41939942 | 8.25357097 |
| 6.02588879 | 5.98751211 | 6.22132417 | 6.12291743 | 7.80081968 | 7.71366489 | 7.46770988 |
| 6.58850792 | 6.01210916 | 6.05583012 | 5.99783546 | 7.48157827 | 7.26109354 | 6.59161794 |
| 6.70924927 | 7.17461814 | 7.01039831 | 6.84717514 | 7.44143451 | 7.70158579 | 7.6664328  |
| 14.1606577 | 13.8644696 | 14.3348431 | 14.0025909 | 15.1585209 | 15.1707627 | 14.7642138 |
| 5.73602465 | 5.40280948 | 5.84541453 | 5.23824231 | 6.19887167 | 8.54301364 | 6.44849514 |
| 6.35526422 | 6.347121   | 6.43047296 | 6.369832   | 7.65142488 | 7.91385041 | 7.21162747 |
| 5.52631425 | 5.45453027 | 5.58547156 | 5.45794127 | 7.08967293 | 6.91714768 | 6.25371685 |
| 12.5858045 | 12.2304315 | 12.3698634 | 12.4284939 | 14.0375084 | 14.2411989 | 13.444998  |
| 7.62752513 | 7.84938633 | 8.34345224 | 8.12816553 | 9.34838957 | 9.06553435 | 8.99151079 |
| 6.22112423 | 6.33081902 | 8.39866461 | 6.08203724 | 9.70739537 | 9.56164939 | 10.1575882 |
| 6.12799989 | 5.9473024  | 5.54252551 | 5.76350001 | 7.19307092 | 7.14108327 | 6.1609593  |
| 5.82786093 | 5.6972762  | 5.79985431 | 5.77115164 | 6.86901387 | 6.91501888 | 6.53960954 |
| 10.6665667 | 10.1247495 | 11.5946176 | 10.7438053 | 12.6300894 | 12.7807022 | 13.0107604 |
| 7.84016422 | 7.22766407 | 8.23883939 | 7.54879494 | 9.00584627 | 9.04159263 | 8.44038127 |
| 9.11578133 | 8.99104956 | 9.46778771 | 8.87983134 | 10.4430544 | 10.4354348 | 10.2709961 |
| 8.47309608 | 8.38901778 | 9.87057803 | 8.57728871 | 12.4696439 | 12.452903  | 11.9225052 |
| 5.60308774 | 5.60710568 | 5.81190485 | 5.51438584 | 6.64238562 | 6.69785442 | 7.2006093  |
| 6.00338883 | 6.44471427 | 6.40710679 | 5.85488409 | 7.38908319 | 7.59969791 | 7.23632327 |
| 6.98192684 | 6.81654467 | 7.53832941 | 6.41797265 | 9.73139303 | 8.88797148 | 8.24103407 |
| 8.6675285  | 8.1635249  | 9.68557894 | 8.31837334 | 10.4943316 | 12.1087032 | 10.4996018 |
| 6.28059894 | 5.70538771 | 6.95365869 | 6.10576879 | 7.92052019 | 7.78893949 | 8.00044796 |
| 8.06607143 | 8.06811561 | 9.15998307 | 8.06722729 | 10.2856877 | 10.1818691 | 10.1766631 |
| 7.86666199 | 7.73861856 | 8.57546966 | 7.71626113 | 9.52938643 | 9.8536988  | 9.14008076 |
| 7.14285757 | 6.81449275 | 6.88164871 | 6.78957668 | 8.9650183  | 8.79661657 | 8.17074831 |
| 5.54062899 | 5.39533294 | 5.70915965 | 5.47340898 | 6.47945888 | 6.4398937  | 6.34285836 |

|            |            |            |            |            |            |            |
|------------|------------|------------|------------|------------|------------|------------|
| 6.54058281 | 6.30975991 | 6.48365893 | 6.23136655 | 8.11101827 | 7.73996283 | 7.36099892 |
| 11.4893046 | 10.8892127 | 12.633671  | 11.1799551 | 13.6419129 | 13.1490744 | 13.6092353 |
| 9.8682486  | 9.50219692 | 10.1417189 | 9.83098193 | 12.180045  | 12.1654629 | 11.7148624 |
| 13.4209405 | 12.9423437 | 14.0187766 | 13.1818536 | 14.7593629 | 14.6428217 | 14.3800836 |
| 11.6874168 | 11.088127  | 12.4290348 | 11.1719893 | 13.2063336 | 13.2636533 | 13.3750096 |
| 8.96304518 | 8.96689704 | 10.3465835 | 8.37386524 | 12.3559575 | 11.6436984 | 11.3537842 |
| 11.5660331 | 11.6845865 | 12.4105059 | 11.9391751 | 13.2662119 | 13.2451071 | 13.1516182 |
| 6.81887867 | 6.29054531 | 7.64205964 | 6.30974209 | 7.81855534 | 8.18996635 | 8.38063898 |
| 6.67445218 | 6.36328359 | 6.74416783 | 6.5390558  | 7.65589274 | 7.58735599 | 7.47176624 |
| 7.25704363 | 8.71233165 | 8.32931379 | 7.13138885 | 9.48492679 | 8.68852553 | 9.68569789 |
| 8.08128689 | 7.56865919 | 8.53442857 | 7.99074502 | 10.3827904 | 10.444605  | 9.77802356 |
| 11.9175977 | 12.1064301 | 13.3792294 | 12.2069481 | 13.5582042 | 13.9750096 | 13.8657014 |
| 8.90675534 | 8.43998086 | 9.15768369 | 8.73488605 | 10.9717591 | 10.7691023 | 10.5049163 |
| 6.12532688 | 5.76153687 | 5.96555067 | 5.9562005  | 6.85065068 | 6.86553781 | 7.06167253 |
| 7.77377814 | 7.66383061 | 7.80129449 | 7.1476191  | 8.94179356 | 8.58042893 | 8.21483102 |
| 5.7739726  | 5.80467366 | 5.93331462 | 5.59259577 | 8.06885028 | 7.16595213 | 7.78607747 |
| 12.4678814 | 12.1471477 | 13.6434865 | 12.6325266 | 14.1637802 | 14.2673507 | 14.0755368 |
| 5.79553813 | 5.73065789 | 5.73584653 | 5.69698449 | 6.38970963 | 6.61185697 | 6.15227835 |
| 7.78796262 | 7.25348163 | 8.12823565 | 7.16507984 | 8.93107994 | 8.83035421 | 8.93578149 |
| 8.04607246 | 7.97445647 | 9.25599256 | 8.04535232 | 9.87172924 | 9.69500691 | 10.1625562 |
| 5.95009906 | 5.70220483 | 5.77969388 | 6.02590695 | 7.10236629 | 6.89023144 | 6.51727223 |
| 5.6594648  | 5.92104471 | 5.89930689 | 6.12134329 | 6.54971091 | 6.72012248 | 7.48550089 |
| 6.99192994 | 6.88187993 | 8.64495763 | 6.93166651 | 8.48451761 | 8.14505174 | 8.75355373 |
| 6.4117313  | 6.18626244 | 7.00827734 | 6.4936515  | 8.34476815 | 7.90812177 | 8.54365556 |
| 6.47436709 | 6.53872625 | 7.09069044 | 6.13971669 | 7.88463089 | 7.86407345 | 7.81727789 |
| 10.6449243 | 9.85279196 | 11.0366778 | 9.94800155 | 11.647699  | 11.1491704 | 11.677314  |
| 10.0635286 | 9.57837949 | 10.0636971 | 9.80808188 | 11.6677334 | 11.6786864 | 10.5432668 |
| 9.18773138 | 8.88243611 | 9.95526717 | 9.06056462 | 12.3249189 | 12.5905709 | 11.3929479 |
| 7.83626501 | 7.68323045 | 8.34813724 | 7.56409613 | 9.09621704 | 9.06958591 | 9.441051   |
| 7.15924267 | 6.96385324 | 7.54624626 | 7.05215284 | 9.36044812 | 9.1118863  | 7.64868689 |
| 10.8087881 | 10.2017221 | 11.6696287 | 10.2846587 | 12.647359  | 12.4824046 | 12.4586758 |
| 5.54895319 | 5.58469498 | 5.69179795 | 5.31997336 | 6.93468044 | 6.85692844 | 6.34400734 |
| 9.39261366 | 8.93642064 | 9.90120405 | 8.88436226 | 10.21463   | 9.88647501 | 10.3976832 |
| 8.04429958 | 7.85044191 | 8.04051714 | 7.86577595 | 9.5954328  | 9.48103632 | 10.1970225 |
| 6.01488839 | 6.14840743 | 7.20842557 | 6.50135507 | 8.32163682 | 7.77864687 | 7.97136306 |
| 6.16482066 | 5.98893117 | 6.47209081 | 6.05174078 | 7.51561548 | 7.12360102 | 7.35396104 |
| 8.70136434 | 8.18030901 | 8.94975202 | 8.6779687  | 10.650191  | 10.0595878 | 10.484687  |
| 9.95294417 | 9.6088619  | 11.0656989 | 9.81431473 | 12.2554529 | 12.2450803 | 11.9490687 |
| 13.9330645 | 13.5033438 | 14.3047021 | 13.5020809 | 15.2362448 | 15.1710564 | 14.7915994 |
| 9.95531295 | 9.59438227 | 11.1755758 | 10.0096803 | 11.6494439 | 11.8215635 | 10.9883112 |
| 5.92645185 | 5.8456599  | 6.20913789 | 5.85146822 | 7.35419648 | 7.34847677 | 6.86786188 |
| 9.04165176 | 9.05398098 | 9.2778388  | 9.39588732 | 10.1813473 | 9.74879966 | 9.64156391 |
| 6.71158438 | 6.5258678  | 6.92964189 | 6.50058108 | 7.73813145 | 7.62448989 | 7.29622612 |
| 13.3072179 | 13.295789  | 13.7580597 | 12.9858636 | 14.4285741 | 14.4414671 | 14.0911643 |
| 8.10526426 | 7.83391978 | 8.82815839 | 8.75769635 | 9.64408069 | 9.32671957 | 9.02674557 |
| 9.22378574 | 9.32286825 | 10.00532   | 9.69746647 | 11.1220625 | 11.644758  | 10.4904227 |
| 5.9073493  | 5.96214804 | 6.12401789 | 5.76860278 | 7.66471251 | 7.37710032 | 7.17064317 |
| 10.1796578 | 9.72731824 | 10.3468328 | 9.70092915 | 11.412926  | 11.6266144 | 11.7025407 |

|            |            |            |            |            |            |            |
|------------|------------|------------|------------|------------|------------|------------|
| 6.28199529 | 6.33544592 | 6.35733365 | 5.95586096 | 7.66393874 | 7.2851266  | 7.82027727 |
| 14.3942798 | 13.8780797 | 14.4724967 | 14.0260064 | 15.3166994 | 15.3947347 | 14.81053   |
| 9.95089732 | 10.3298782 | 11.4200218 | 10.4448637 | 11.9297045 | 11.9242001 | 11.8425951 |
| 11.0035074 | 10.6218797 | 10.9879333 | 10.843037  | 12.7437706 | 12.8630778 | 12.2124602 |
| 8.56063472 | 7.94211918 | 8.5799585  | 7.53235047 | 9.7672423  | 9.3136277  | 10.333616  |
| 7.33492576 | 6.64590336 | 8.14123965 | 6.59271416 | 10.8260948 | 11.1807521 | 10.751185  |
| 6.91292286 | 6.50426444 | 6.63239692 | 6.71873835 | 8.53366301 | 8.54917435 | 8.27365948 |
| 10.9009611 | 10.7506501 | 12.1166585 | 10.4633854 | 12.4314605 | 12.0509295 | 11.4924706 |
| 6.28342826 | 5.27204522 | 6.06954064 | 5.44530526 | 7.07675682 | 6.78104491 | 8.50204532 |
| 6.11707537 | 5.93521881 | 6.32331512 | 6.13001943 | 7.59229033 | 7.38471383 | 7.30612003 |
| 5.85877327 | 5.23548697 | 5.57090885 | 5.70000351 | 6.40553039 | 6.85407172 | 6.2073738  |
| 6.25068119 | 6.10592673 | 6.70242206 | 6.29986867 | 7.69293556 | 7.84840386 | 7.0501904  |
| 12.1837427 | 11.9709475 | 12.7800156 | 12.1560568 | 13.4852696 | 13.6873134 | 12.600532  |
| 8.24384708 | 7.68248692 | 8.45039473 | 7.12965807 | 10.1062672 | 10.5763313 | 8.71850822 |
| 7.42470883 | 7.61306011 | 8.42923892 | 6.91686832 | 9.26924593 | 9.60412823 | 9.41339014 |
| 8.71036839 | 8.16785766 | 9.87773076 | 8.45508429 | 11.6415384 | 11.6041357 | 11.509199  |
| 10.2170465 | 9.75941536 | 11.9452251 | 9.99716113 | 12.1930426 | 11.3680863 | 12.101328  |
| 5.98382519 | 5.97077476 | 6.9412155  | 6.12785714 | 7.7989111  | 7.06163149 | 7.32607978 |
| 8.76502812 | 8.41612151 | 9.8350687  | 8.40951823 | 11.0204105 | 10.606878  | 10.3031688 |
| 6.08128785 | 5.87262391 | 5.96877069 | 5.76555252 | 7.31898109 | 7.48363603 | 7.06156669 |
| 13.7481425 | 13.3728188 | 13.9316507 | 13.2513525 | 15.0531041 | 14.8468023 | 14.5140581 |
| 8.15377899 | 7.87893374 | 7.91071707 | 7.98828477 | 9.99476073 | 10.1084356 | 9.45815209 |
| 5.46493091 | 5.31452035 | 5.88396337 | 5.53589992 | 6.75718197 | 7.54655959 | 6.65047737 |
| 6.72946032 | 6.91246425 | 7.2421747  | 6.9308816  | 7.67324122 | 7.71222364 | 7.9875295  |
| 12.3042061 | 11.9032323 | 12.3038144 | 11.6907942 | 14.1552752 | 14.1163123 | 13.7293457 |
| 8.42477096 | 8.13910313 | 8.59530411 | 8.66918023 | 9.85840846 | 9.52945066 | 8.5843714  |
| 5.66491086 | 5.58921129 | 5.95915994 | 5.58544272 | 6.8904698  | 7.0937746  | 6.71077062 |
| 6.07782428 | 5.87100799 | 5.43037059 | 5.97875804 | 7.72235536 | 7.46706831 | 6.21639724 |
| 6.94467341 | 6.79184793 | 8.12724222 | 6.82000404 | 9.81441536 | 9.73134738 | 9.61587604 |
| 8.1737296  | 8.08739707 | 8.84415463 | 7.91524182 | 9.67061695 | 9.94391737 | 9.0589477  |
| 8.15293074 | 7.74485402 | 8.72659522 | 7.92664173 | 9.85009118 | 9.46558865 | 8.31941923 |
| 5.59238976 | 5.50390268 | 5.90504469 | 5.93697637 | 6.96711557 | 7.02620471 | 6.71288462 |
| 8.22117093 | 8.99541442 | 9.13800218 | 8.79769686 | 9.69126737 | 10.3326196 | 10.1586879 |
| 6.79968183 | 6.64694746 | 6.9559207  | 7.12824184 | 7.95434406 | 7.86022413 | 9.01611407 |
| 6.75725399 | 6.44880698 | 7.96086034 | 6.65410324 | 9.27229409 | 8.98272868 | 8.78011387 |
| 6.36381569 | 6.07475802 | 6.61891476 | 6.32266242 | 8.28677998 | 8.24377998 | 7.55643018 |
| 5.7868752  | 5.44522678 | 5.99229282 | 5.83476986 | 6.631368   | 7.05754991 | 6.56265228 |
| 5.96088072 | 5.51695278 | 6.6119319  | 5.53524209 | 7.44632323 | 7.76210361 | 6.98754485 |
| 9.29293678 | 8.98283647 | 9.79785847 | 8.85458948 | 10.7218673 | 10.8809839 | 10.2381802 |
| 9.01289434 | 8.69064093 | 10.8255003 | 8.47663726 | 11.7885899 | 11.8517366 | 11.4295574 |
| 5.69372139 | 5.58853656 | 5.80265077 | 5.5620357  | 7.62119181 | 7.77527644 | 7.01797645 |
| 5.70838094 | 5.61448518 | 5.82014883 | 5.6691983  | 7.03810361 | 7.00565935 | 6.37819479 |
| 6.84305675 | 6.79918576 | 7.69602303 | 6.86946923 | 7.81038398 | 8.02899783 | 8.36225727 |
| 6.15413173 | 5.83579425 | 6.14365912 | 5.95956431 | 7.88557681 | 7.3774639  | 9.13182944 |
| 5.53978136 | 5.39433064 | 5.80962718 | 5.43839865 | 6.51510403 | 6.5248247  | 6.49055746 |
| 11.3448995 | 10.9910236 | 12.53547   | 11.3463819 | 13.9851597 | 13.8708251 | 13.3150703 |
| 7.02475405 | 6.89597267 | 9.74738774 | 7.26276012 | 11.575032  | 11.6172392 | 12.0770484 |
| 8.30950364 | 8.35365058 | 9.11383617 | 8.41094609 | 10.23786   | 9.92103756 | 10.1131001 |

|            |            |            |            |            |            |            |
|------------|------------|------------|------------|------------|------------|------------|
| 9.22328787 | 8.60225532 | 9.2173696  | 8.73080398 | 9.93781958 | 10.2649527 | 10.0215963 |
| 11.220408  | 10.8783606 | 10.8878816 | 10.9703928 | 12.6077194 | 12.6855202 | 12.0932565 |
| 5.80962538 | 5.62659537 | 6.25243326 | 5.74595044 | 7.81927093 | 7.89159295 | 7.41558799 |
| 8.18522432 | 7.9292442  | 9.24947307 | 8.06358329 | 9.81553476 | 9.83277611 | 9.78815011 |
| 7.54664293 | 6.90349507 | 8.11439097 | 7.0032188  | 8.38669931 | 8.29654643 | 8.88084437 |
| 5.78577442 | 5.7843061  | 5.92860412 | 5.90585822 | 6.58219513 | 6.64349879 | 6.53916052 |
| 6.27843979 | 6.71973243 | 6.48732781 | 6.71474419 | 7.89427514 | 7.88166829 | 6.92132921 |
| 9.85145032 | 9.70538322 | 9.90151588 | 10.075546  | 11.1937021 | 11.1984217 | 11.2304186 |
| 7.71611294 | 7.60047717 | 8.7347252  | 7.88168175 | 10.1845791 | 9.87798499 | 9.81659587 |
| 6.27537718 | 6.29037058 | 6.5486151  | 6.06590723 | 7.21283097 | 7.62554302 | 7.14121103 |
| 6.38703833 | 6.37058158 | 6.87399771 | 6.70711061 | 7.81268625 | 8.04875441 | 7.8186512  |
| 5.45401924 | 5.56304034 | 5.83574752 | 5.46540478 | 7.23551167 | 7.30890053 | 6.37666216 |
| 9.56858244 | 8.79586855 | 10.6507242 | 8.58934142 | 11.7924857 | 11.8895032 | 11.5960933 |
| 7.65841073 | 7.53896877 | 7.81345479 | 7.5081101  | 9.70843782 | 9.75505798 | 9.11971411 |
| 8.09947669 | 7.84116616 | 8.98174079 | 7.71724664 | 11.4721247 | 11.5720654 | 11.0608168 |
| 6.04650961 | 5.94257034 | 5.35748409 | 5.94559881 | 7.12923974 | 7.05699205 | 6.01828209 |
| 5.59552723 | 5.16710418 | 5.60001427 | 5.21083107 | 8.18355748 | 8.0587321  | 7.34103395 |
| 10.1490358 | 10.3419157 | 11.1542359 | 10.2049183 | 11.5687276 | 13.0865683 | 12.5877864 |
| 8.56394022 | 8.07737226 | 9.38587275 | 8.15279236 | 10.151647  | 9.65813149 | 10.0890545 |
| 11.0067111 | 11.0483309 | 12.0419096 | 10.8679891 | 12.9053103 | 12.7338848 | 12.3920558 |
| 6.58628482 | 6.44473216 | 6.5409389  | 6.11940826 | 7.03383263 | 6.93672155 | 6.73766378 |
| 5.646014   | 5.68491129 | 5.5037755  | 5.51827767 | 6.29492782 | 6.48351496 | 7.64341249 |
| 13.6747583 | 13.1653593 | 13.9511964 | 13.3346043 | 15.3461619 | 15.1588625 | 14.3997532 |
| 13.4397387 | 13.1894325 | 14.3417634 | 13.5831568 | 14.9358115 | 14.7978363 | 14.6925627 |
| 10.3389893 | 9.50482852 | 10.2050149 | 9.89753072 | 10.3832226 | 9.64019016 | 8.8975941  |
| 5.70581981 | 5.60890828 | 6.25255739 | 5.86590051 | 7.44598156 | 6.94679986 | 6.53592526 |
| 6.80840307 | 6.54050237 | 7.41720611 | 6.42052165 | 8.30069437 | 7.93863278 | 7.76263451 |
| 6.51334451 | 6.07098217 | 6.64833889 | 6.52413484 | 7.92339464 | 7.67548499 | 7.38393666 |
| 6.77614479 | 6.59303789 | 7.83682358 | 6.70216576 | 8.78439307 | 8.50751678 | 8.84660144 |
| 5.69215684 | 5.54226579 | 5.92607653 | 5.55967413 | 7.57456098 | 7.33213951 | 6.66100846 |
| 12.0325803 | 11.6566389 | 12.0995346 | 11.8926878 | 13.2266566 | 13.3056656 | 13.0791291 |
| 8.83094803 | 8.55997623 | 11.1163466 | 8.80713367 | 11.2581897 | 10.5154673 | 11.7145881 |
| 9.22277655 | 9.2322535  | 10.256572  | 9.22465918 | 11.4171806 | 10.5936563 | 11.7120304 |
| 7.66141898 | 7.75111621 | 8.60639781 | 7.64821879 | 8.90728097 | 9.39773538 | 9.16242658 |
| 7.05474756 | 6.64601429 | 8.00401536 | 6.48859727 | 9.99772145 | 9.90698136 | 9.69035371 |
| 6.6217593  | 6.47798746 | 6.89653222 | 6.58944756 | 7.85791694 | 7.79211547 | 7.99647914 |
| 7.19847254 | 7.37218599 | 7.37864254 | 7.00322442 | 8.89105032 | 8.58822666 | 8.9243434  |
| 7.28410043 | 7.30000289 | 8.92653974 | 7.48694521 | 10.3614734 | 9.84846129 | 9.45176624 |
| 5.94792466 | 6.04114177 | 6.2658423  | 5.88828151 | 7.67281708 | 7.30770993 | 7.00890701 |
| 6.92810853 | 6.48126342 | 7.25704174 | 6.74418667 | 8.60226274 | 8.87803068 | 9.04672323 |
| 8.74099264 | 8.42712508 | 9.39181003 | 8.29421132 | 10.7052082 | 10.4408079 | 10.4821656 |
| 11.0438879 | 10.1187387 | 12.0472218 | 10.0475643 | 13.4179211 | 13.3163607 | 12.7395522 |
| 11.2151174 | 10.7582582 | 11.6497443 | 11.1577941 | 12.2016112 | 12.7033203 | 12.2647241 |
| 7.45756557 | 6.97391085 | 9.02012073 | 7.4187027  | 10.4952305 | 10.6777681 | 9.22651816 |
| 5.5566115  | 5.6069266  | 6.04558036 | 5.73763323 | 6.62435697 | 6.53493936 | 6.79786122 |
| 6.33350388 | 6.28603982 | 7.27453005 | 6.11702299 | 8.80353478 | 8.12109779 | 7.73010462 |
| 8.87352132 | 8.39324371 | 10.8616546 | 9.33859445 | 11.0931594 | 11.4833699 | 10.6283216 |
| 7.25312797 | 7.3549678  | 8.24115137 | 7.61358322 | 8.65598251 | 8.84571365 | 9.53447856 |

|            |            |            |            |            |            |            |
|------------|------------|------------|------------|------------|------------|------------|
| 6.81113447 | 6.69626791 | 7.64682509 | 7.02507532 | 8.73142765 | 8.44944665 | 8.36861428 |
| 5.69185209 | 5.62934176 | 5.98857608 | 5.75875781 | 7.17532998 | 6.89448312 | 6.63844953 |
| 7.13883187 | 7.14673973 | 7.22794896 | 7.25162916 | 8.66562834 | 8.56311465 | 7.39371135 |
| 8.56123982 | 8.46915297 | 8.27505316 | 8.60659953 | 9.5916596  | 9.48915072 | 8.99975963 |
| 7.20706509 | 6.71487879 | 9.00748454 | 7.56996267 | 8.72292055 | 8.34515461 | 10.1249239 |
| 11.2353753 | 11.064864  | 12.074379  | 11.0648802 | 12.6665203 | 12.6208636 | 12.6592179 |
| 7.29365924 | 6.81368244 | 5.56790711 | 6.93020273 | 8.41403868 | 8.22573524 | 6.15394312 |
| 7.06639708 | 6.62130054 | 7.86670278 | 6.58484317 | 8.71233715 | 8.86898363 | 8.96688003 |
| 10.8284888 | 10.5882818 | 11.5139743 | 10.8269377 | 13.3472449 | 13.4517649 | 12.6618549 |
| 12.0281685 | 11.7992618 | 12.955446  | 11.7064516 | 13.6563388 | 13.2031144 | 12.7029252 |
| 6.65549065 | 5.32466482 | 5.72085439 | 5.62128032 | 7.33580568 | 7.0826366  | 7.31200709 |
| 6.00664564 | 6.35953944 | 7.09467312 | 6.91400236 | 7.9050867  | 8.16348364 | 7.58770627 |
| 6.56036738 | 6.20948709 | 7.97259617 | 6.08234536 | 8.34327812 | 8.22115449 | 8.03666487 |
| 5.95946068 | 5.68301789 | 5.3897905  | 5.79017748 | 7.38501077 | 7.08510593 | 6.08070435 |
| 9.83693638 | 9.44617226 | 9.91069594 | 9.66963751 | 11.6333249 | 11.7916086 | 11.3242076 |
| 10.4436605 | 9.24356198 | 10.3380678 | 9.27646061 | 11.3571616 | 11.2514049 | 10.5005173 |
| 8.16518689 | 7.67696128 | 9.93511303 | 7.67329706 | 11.3179807 | 11.2644919 | 11.0435755 |
| 7.93609727 | 7.93296411 | 8.69289791 | 7.87958693 | 9.77688896 | 10.3615535 | 9.61628528 |
| 7.72532604 | 7.47278587 | 8.096255   | 7.71119684 | 10.69863   | 10.6986439 | 9.90130332 |
| 12.1782329 | 11.9600106 | 12.3498955 | 12.0461653 | 14.0476105 | 14.0459925 | 13.3496987 |
| 6.34681474 | 6.08973203 | 6.75615331 | 6.11513044 | 7.29271366 | 7.43425458 | 7.0976761  |
| 5.82535138 | 5.65261728 | 6.42550613 | 5.52420193 | 8.21714976 | 7.83952442 | 8.25265834 |
| 6.18753795 | 6.35654088 | 7.00793102 | 6.00832149 | 7.43112064 | 6.41761745 | 8.25334216 |
| 6.01013957 | 5.75144765 | 6.11865396 | 5.80138037 | 6.5633772  | 7.11386299 | 6.30125419 |
| 6.04556944 | 5.95776327 | 6.30969007 | 5.9391765  | 7.23880405 | 7.55556388 | 6.95391007 |
| 7.44189841 | 7.19361505 | 8.23656724 | 7.24714236 | 8.74412947 | 8.89768273 | 9.10743941 |
| 7.39161136 | 7.1049939  | 9.06324244 | 6.97298897 | 11.3531667 | 11.2308503 | 10.4080569 |
| 6.16526359 | 6.15631591 | 7.0967531  | 6.32130201 | 9.05831839 | 8.45054443 | 8.65298726 |
| 12.041526  | 11.5998273 | 12.8446764 | 11.9573785 | 13.7878954 | 13.3533123 | 13.5207709 |
| 7.89995865 | 8.10876384 | 8.77014486 | 8.03941205 | 8.89354545 | 9.17658159 | 9.4252052  |
| 5.11924079 | 6.72592925 | 5.20079937 | 4.98961952 | 5.98220233 | 8.11077352 | 8.34182701 |
| 6.01383539 | 7.04698318 | 6.65936946 | 6.66340582 | 7.63347117 | 7.86100562 | 9.14683873 |
| 8.21305463 | 7.72081541 | 8.88951978 | 7.7101073  | 10.9385497 | 10.5639189 | 11.1111533 |
| 7.05469439 | 6.88311857 | 7.09453906 | 7.27902735 | 7.8146709  | 8.63036069 | 7.98372158 |
| 7.02163629 | 6.8673121  | 8.3910876  | 6.77669095 | 9.98691858 | 10.1417151 | 9.43623994 |
| 8.12982187 | 8.10074801 | 9.08194407 | 8.14787497 | 9.68477877 | 9.68979221 | 10.6238614 |
| 5.71563863 | 6.00893972 | 5.80635139 | 5.93037709 | 6.82700728 | 6.88276286 | 7.09771192 |
| 6.32170879 | 6.18946107 | 6.89235095 | 6.64633261 | 8.32753199 | 7.75806661 | 7.88495257 |
| 8.29212834 | 8.23604577 | 9.85568267 | 8.54109468 | 11.7519574 | 11.8197289 | 11.0413238 |
| 7.92322883 | 7.48228281 | 7.31632317 | 7.52074753 | 9.39676103 | 9.18850255 | 9.02383224 |
| 7.17896954 | 7.09352743 | 8.60664136 | 6.63734086 | 8.8173377  | 9.23933837 | 9.2324689  |
| 6.00409931 | 6.03865807 | 6.03637036 | 6.14179367 | 7.68832795 | 7.56295138 | 7.34748318 |
| 8.24191024 | 7.7659769  | 9.3164112  | 7.42460134 | 10.8493824 | 10.4759198 | 9.64070859 |
| 8.67435013 | 8.40540274 | 9.8340935  | 8.54070771 | 10.7112153 | 10.2406053 | 10.3599834 |
| 7.63794999 | 7.43785692 | 8.40972357 | 7.72572616 | 9.57709833 | 9.38145232 | 8.49639204 |
| 6.35062754 | 5.86660858 | 6.44683551 | 5.75361176 | 7.38646178 | 7.20912287 | 6.81889784 |
| 5.68301171 | 5.57176023 | 5.88237845 | 5.74448755 | 7.28649215 | 7.29784529 | 6.64782535 |
| 6.86835094 | 6.8156177  | 7.70094319 | 6.52360414 | 9.10238834 | 8.84742291 | 9.04821548 |

|            |            |            |            |            |            |            |
|------------|------------|------------|------------|------------|------------|------------|
| 7.35060598 | 7.47313018 | 8.00487775 | 7.40324812 | 9.01576767 | 8.97622987 | 7.95799757 |
| 9.73929406 | 10.0509207 | 11.3474082 | 10.2659807 | 12.056935  | 11.5862013 | 12.4406317 |
| 5.69061404 | 5.41622633 | 5.89463663 | 5.26474622 | 6.3111138  | 6.43025466 | 6.22196599 |
| 9.13464836 | 9.62113043 | 10.0217823 | 9.51475508 | 10.7021891 | 11.1740462 | 11.872586  |
| 6.95538256 | 6.9841769  | 8.24686313 | 6.95799583 | 9.18539184 | 9.25074371 | 10.5386371 |
| 6.2739703  | 6.25454038 | 7.35557662 | 7.02821109 | 9.27130451 | 8.01276252 | 7.54048998 |
| 7.1472548  | 6.82987619 | 7.34974476 | 6.62474063 | 9.42143897 | 9.52664458 | 9.02213114 |
| 5.6536144  | 5.53632835 | 6.08757719 | 5.5806454  | 7.3244371  | 7.0556577  | 7.19609651 |
| 7.9614387  | 7.33913649 | 8.99760122 | 7.3001045  | 10.8987095 | 10.6618805 | 10.3294466 |
| 5.85642852 | 5.71477523 | 6.04739923 | 5.9547963  | 6.68578461 | 6.76866338 | 6.61058816 |
| 7.37862866 | 7.17294749 | 8.61794675 | 7.01760684 | 10.0003015 | 9.90857906 | 9.36113362 |
| 6.417865   | 6.31383536 | 6.41205763 | 6.10719238 | 7.5436691  | 7.49868967 | 7.53236606 |
| 6.53963746 | 6.25793238 | 6.62241486 | 6.11574929 | 8.39678029 | 7.57861045 | 6.93697119 |
| 7.00322442 | 6.39652961 | 7.32307729 | 6.84666506 | 7.77290638 | 7.67600077 | 9.19784205 |
| 10.275773  | 10.2668416 | 12.5631121 | 10.7756597 | 12.7168373 | 12.4221116 | 13.7658807 |
| 6.59495321 | 8.17535942 | 6.62064036 | 7.38043769 | 8.79111599 | 7.05849076 | 6.71612529 |
| 10.2581573 | 9.73304465 | 11.1836912 | 10.1388349 | 12.5369548 | 12.3420477 | 12.6029422 |
| 6.04021497 | 5.9376144  | 5.60666667 | 5.93153675 | 6.76848739 | 6.95240929 | 6.14353567 |
| 7.75518269 | 7.31981209 | 8.67162846 | 7.81874833 | 9.4298536  | 9.2963475  | 9.68144013 |
| 13.2546434 | 12.5335259 | 13.897143  | 13.2326076 | 14.5911372 | 14.180164  | 14.5424793 |
| 7.26548284 | 7.09625026 | 7.71310465 | 6.71490489 | 8.91399608 | 8.53461299 | 8.64325266 |
| 11.7184935 | 11.50446   | 11.7765379 | 11.9124676 | 13.6598867 | 13.8289199 | 13.085211  |
| 8.74432662 | 8.49497755 | 9.32346037 | 8.87024572 | 10.5482526 | 10.3093081 | 10.8065955 |
| 11.0967501 | 10.7488813 | 11.9914684 | 10.7681173 | 13.1589342 | 12.9119284 | 13.1575213 |
| 8.6394847  | 8.38537452 | 9.6637415  | 9.31521366 | 10.4690485 | 10.2048462 | 10.4187255 |
| 7.96242987 | 8.04643977 | 9.11413143 | 7.78650031 | 10.1470115 | 10.1635981 | 11.0680353 |
| 6.06627135 | 6.38300576 | 8.0819675  | 6.47547275 | 8.30991239 | 8.3669774  | 7.88936524 |
| 9.56849238 | 9.04929641 | 10.1550434 | 9.2322108  | 10.5965877 | 10.7558006 | 10.6016807 |
| 5.42166328 | 5.20201174 | 5.27787059 | 5.03248263 | 6.67871421 | 6.69108884 | 6.27764207 |
| 11.5168519 | 10.8947556 | 10.1070156 | 11.9610401 | 12.8552707 | 12.5955279 | 13.1241283 |
| 5.89469701 | 5.66765516 | 6.58257241 | 5.66465918 | 8.04880726 | 8.26758636 | 7.94734472 |
| 5.8543054  | 5.49021776 | 5.79935805 | 5.67325055 | 7.36470987 | 7.19535646 | 6.58046662 |
| 11.2997152 | 10.6195066 | 11.809482  | 10.4809033 | 12.387302  | 12.0726703 | 12.0397567 |
| 6.35661342 | 6.16863462 | 7.2534022  | 6.09861978 | 7.89734632 | 7.91229418 | 8.24679142 |
| 8.874702   | 8.43247926 | 10.0656221 | 8.44043692 | 10.9599042 | 10.3527519 | 10.1410419 |
| 9.15662869 | 8.53977377 | 8.82715309 | 8.83833634 | 10.0568599 | 9.92533917 | 9.06402461 |
| 6.09366686 | 6.06940143 | 6.93333776 | 6.4528056  | 7.50550274 | 7.70856869 | 7.9064024  |
| 8.86782513 | 8.83305705 | 9.04507214 | 8.58831062 | 10.5177757 | 10.4635509 | 10.132663  |
| 6.47884629 | 6.35313059 | 6.8622096  | 6.56879537 | 7.88470536 | 7.77147164 | 7.7436146  |
| 12.3533806 | 11.8098176 | 12.2722396 | 12.1945833 | 13.9788945 | 13.8892815 | 13.4623987 |
| 8.3738074  | 7.99409769 | 8.88858771 | 7.93693528 | 9.75783917 | 9.99366587 | 9.26751777 |
| 5.44349327 | 5.37168117 | 5.82131225 | 5.64621768 | 7.39905827 | 7.1146856  | 7.49593016 |
| 7.82727347 | 7.48501699 | 7.79545203 | 7.26391797 | 9.01641665 | 8.93887826 | 8.39987731 |
| 6.01486653 | 5.98202796 | 6.84938884 | 6.16076997 | 7.88248104 | 7.38572093 | 6.84175303 |
| 11.785589  | 11.1097347 | 12.80756   | 11.7606734 | 13.2079073 | 13.2156687 | 13.778803  |
| 6.30222509 | 6.15554181 | 7.1028817  | 6.47170691 | 8.26205161 | 8.29236995 | 8.40427686 |
| 7.10255526 | 6.79806348 | 8.11058249 | 6.77644751 | 9.84468254 | 9.87726803 | 9.06044925 |
| 7.12052509 | 6.91832541 | 7.6233343  | 6.88044555 | 9.01838409 | 8.89902877 | 8.72373704 |

|            |            |            |            |            |            |            |
|------------|------------|------------|------------|------------|------------|------------|
| 6.45304193 | 6.17923076 | 6.65836003 | 6.42720556 | 8.68685626 | 8.71481287 | 7.97111528 |
| 5.97993456 | 5.87277829 | 6.64548552 | 5.68385868 | 7.27606484 | 6.85541669 | 7.01649521 |
| 5.65811292 | 5.74569637 | 6.1752653  | 5.70979764 | 7.30536958 | 7.27073449 | 6.84635165 |
| 7.12310021 | 6.7121404  | 7.06939606 | 6.61614035 | 7.94319992 | 7.73161229 | 7.81761686 |
| 9.62524583 | 9.19418779 | 9.83115647 | 9.51457323 | 11.794058  | 11.7856838 | 11.0843905 |
| 8.68312726 | 8.18512321 | 8.93950517 | 8.15919876 | 9.42648701 | 9.49679647 | 9.48441046 |
| 11.3198335 | 11.1128291 | 11.2590936 | 11.1773211 | 12.8700979 | 13.1153032 | 12.4129876 |
| 8.09985589 | 7.95207201 | 8.10951728 | 7.69860814 | 8.87753384 | 9.07629667 | 8.60954482 |
| 6.50032421 | 6.15232947 | 7.04387706 | 6.76920444 | 7.40226001 | 7.96726143 | 7.13141766 |
| 7.71583847 | 7.62976533 | 7.96561692 | 7.86566833 | 9.15778448 | 9.67191607 | 7.82387225 |
| 7.39867615 | 7.19664638 | 7.79946944 | 6.63574032 | 8.74766231 | 8.56406563 | 7.8707913  |
| 10.775723  | 10.4268989 | 10.7515357 | 10.488746  | 12.7755586 | 12.8469146 | 12.3033635 |
| 6.24343279 | 5.84871081 | 5.90630883 | 5.9139935  | 7.15227267 | 6.87814535 | 7.02077331 |
| 12.961237  | 12.6533348 | 13.0787579 | 12.861602  | 14.5584016 | 14.4826926 | 13.9290364 |
| 6.37817154 | 6.13406175 | 6.72736096 | 6.35610207 | 7.68665179 | 8.03349789 | 7.32293042 |
| 8.86069996 | 8.37350032 | 8.67631079 | 8.61875329 | 10.7741636 | 10.768793  | 10.337371  |
| 8.41473428 | 7.58110264 | 8.77017262 | 7.43339599 | 9.97907216 | 9.59532574 | 9.46318042 |
| 5.86921035 | 5.92170243 | 6.32285239 | 5.99144112 | 7.20510607 | 7.10199562 | 6.44654855 |
| 7.21446581 | 6.89526142 | 8.35470736 | 7.44900416 | 9.30174036 | 8.44200254 | 7.86677077 |
| 5.60664446 | 5.64119283 | 5.65067066 | 5.90687425 | 6.6209057  | 6.72326229 | 7.0462946  |
| 6.78611408 | 6.37963171 | 7.36668241 | 7.06864502 | 8.13414083 | 7.77655476 | 6.97853773 |
| 5.40657749 | 5.39735599 | 5.5326137  | 5.53627457 | 6.31074273 | 6.33829515 | 6.36806656 |
| 5.70543057 | 5.58645102 | 5.77359869 | 5.63796462 | 6.86331531 | 6.90651304 | 6.38901038 |
| 6.00609736 | 5.7272218  | 6.05663663 | 5.90233556 | 7.58067162 | 7.13478567 | 6.83221154 |
| 5.71025762 | 5.60257031 | 6.14548997 | 5.87672075 | 7.24987194 | 6.94960146 | 6.52992118 |
| 5.48539913 | 5.2765886  | 5.52375608 | 5.34246692 | 6.29783227 | 6.3200994  | 6.22112326 |
| 5.66106348 | 5.66844367 | 6.27628616 | 6.01968279 | 7.32542869 | 7.13394055 | 7.3561667  |
| 7.05569674 | 6.55558105 | 7.98516283 | 7.06496151 | 8.67065944 | 7.96689416 | 8.73075882 |
| 5.77144272 | 5.75654618 | 5.6414417  | 5.74820734 | 7.15278171 | 6.62453127 | 6.73266266 |
| 6.05123896 | 5.71990516 | 6.71739403 | 5.89542672 | 7.77486413 | 7.32374385 | 7.00797361 |
| 5.27657185 | 5.22576657 | 5.46532739 | 5.38994017 | 6.34731964 | 6.35502966 | 6.09542319 |
| 5.82931505 | 5.5706296  | 5.69011059 | 5.79237802 | 6.71567377 | 6.49842146 | 6.37626972 |
| 6.19479329 | 6.04669033 | 6.44776233 | 5.79886239 | 7.52956018 | 7.50405305 | 7.30808688 |
| 5.33416636 | 5.38521013 | 5.53132968 | 5.41670972 | 6.57790597 | 6.52900725 | 6.28783518 |
| 6.58667393 | 6.2590587  | 7.52326555 | 6.90128205 | 8.2530698  | 8.01369059 | 8.09410197 |
| 5.6106605  | 5.34595339 | 5.97959965 | 5.4982164  | 8.27984919 | 7.82819933 | 7.13305382 |
| 6.53250508 | 6.29723636 | 7.32513992 | 6.62256978 | 8.4414673  | 7.94025839 | 7.58917922 |
| 5.62205153 | 5.65815006 | 6.23324923 | 5.86339114 | 6.99695021 | 6.80768464 | 6.469219   |
| 5.58493665 | 5.55579315 | 5.740552   | 5.69920819 | 6.55039065 | 6.53621146 | 6.35458333 |
| 6.9942018  | 6.85368009 | 7.70272887 | 6.82798919 | 8.88148201 | 8.86894691 | 9.54694576 |
| 6.32522233 | 6.15231263 | 6.93168069 | 6.65747995 | 8.04773959 | 7.68600811 | 7.43205828 |
| 6.57906789 | 6.31161773 | 7.12240457 | 6.6694662  | 7.88478472 | 7.51129962 | 8.00864039 |
| 6.83360233 | 6.53146053 | 7.31574826 | 7.10412695 | 7.74914002 | 7.6696476  | 7.79531045 |
| 5.66738437 | 5.53306181 | 6.27305518 | 5.78873921 | 6.93019918 | 6.88737417 | 7.39967014 |
| 5.10393945 | 5.07158936 | 5.40412892 | 5.24075966 | 6.21897679 | 6.07729193 | 5.92243431 |
| 5.97347145 | 5.87237249 | 6.14136106 | 5.69689911 | 7.51172894 | 7.41076169 | 7.00555157 |
| 5.48903806 | 5.32043305 | 5.48624552 | 5.68324337 | 6.37267338 | 6.35324088 | 6.47026841 |
| 6.01935254 | 6.1687782  | 7.8149131  | 5.98368636 | 8.46530029 | 7.87539674 | 7.81479713 |



|            |            |            |            |            |            |            |
|------------|------------|------------|------------|------------|------------|------------|
| 5.30901862 | 5.24747261 | 6.27235676 | 5.42795407 | 7.03534018 | 6.62717154 | 6.84978039 |
| 5.76652414 | 5.73941177 | 5.84791425 | 6.0616006  | 8.36210821 | 7.79378081 | 7.27131455 |
| 6.08843379 | 6.12063395 | 6.05237611 | 5.86025518 | 7.46164069 | 7.14773814 | 7.73888806 |
| 5.40624039 | 5.2584149  | 5.76945863 | 5.52267348 | 7.17073128 | 7.13312474 | 6.9028478  |
| 6.09395604 | 5.89305709 | 6.53511049 | 5.68018762 | 7.51231381 | 7.6003493  | 7.4968418  |
| 7.00155232 | 6.03641586 | 7.37136545 | 6.32107449 | 8.03193604 | 7.69452156 | 8.23625055 |
| 7.34523934 | 7.00931134 | 7.85225546 | 7.15039416 | 9.85222908 | 9.90590803 | 9.29568216 |
| 6.76800828 | 6.53154506 | 7.78250096 | 6.62786798 | 8.42813569 | 8.12766887 | 8.25545541 |
| 5.37375434 | 5.31613633 | 5.48455741 | 5.55612619 | 6.27868362 | 6.3360525  | 6.16223824 |
| 6.1061454  | 5.90372426 | 6.44173162 | 6.9729706  | 7.47207749 | 6.97382133 | 8.44912305 |
| 5.41209388 | 5.41026342 | 6.13619098 | 5.4522386  | 7.39839569 | 7.58332502 | 7.15303819 |
| 5.97840387 | 5.81029271 | 6.80597984 | 6.25621624 | 7.5910226  | 7.2324948  | 7.21407331 |
| 7.53715005 | 7.22221819 | 7.79342969 | 7.82206217 | 9.10464828 | 8.66045056 | 8.73059309 |
| 5.73700824 | 5.69543405 | 5.65542425 | 5.8109199  | 7.02382642 | 6.65453865 | 6.52279634 |
| 6.21266758 | 5.91497489 | 6.84507851 | 6.20542399 | 7.64347166 | 7.26842129 | 7.44801551 |
| 6.52000683 | 6.439674   | 7.28912438 | 6.91295878 | 8.37809323 | 7.86491412 | 8.17511986 |
| 5.51158695 | 5.40335806 | 6.23222424 | 5.65533408 | 7.13130858 | 6.64416345 | 6.96176222 |
| 6.19567516 | 5.70256696 | 6.21481723 | 5.99464014 | 7.6555987  | 7.43975111 | 6.80602755 |
| 5.62633867 | 5.76783989 | 5.78017254 | 5.64281101 | 6.94559717 | 6.524705   | 6.44103456 |
| 5.2626564  | 5.09087206 | 5.29163339 | 5.21574343 | 6.04687866 | 6.09119882 | 6.05125506 |
| 5.42645498 | 5.34412402 | 5.45787135 | 5.17806205 | 6.11835848 | 6.19000498 | 6.10202251 |
| 6.16244571 | 6.07595314 | 6.9874971  | 6.118016   | 7.57708058 | 7.62268808 | 7.46596222 |
| 5.44306189 | 5.24875607 | 5.36648798 | 5.15623439 | 6.30064267 | 6.27374637 | 6.13116307 |
| 5.91023593 | 5.82785763 | 5.80892995 | 6.02257333 | 6.95137681 | 6.99705751 | 6.34780064 |
| 5.43348095 | 5.38068997 | 5.74329603 | 5.37632164 | 6.74118246 | 6.20765765 | 6.3454881  |
| 5.31428795 | 5.20649593 | 5.62860243 | 5.09070314 | 6.18454572 | 6.14022384 | 6.06304966 |
| 5.98981091 | 5.73474294 | 7.45219264 | 5.91983202 | 8.13243649 | 7.79764207 | 8.15202721 |
| 5.94923889 | 5.85161089 | 6.41105163 | 5.95526072 | 7.69197936 | 7.07626727 | 7.25574148 |
| 5.58982939 | 5.53810045 | 5.64475096 | 5.51510246 | 6.69891159 | 6.57131017 | 6.45222427 |
| 5.99625993 | 5.93152635 | 6.92045767 | 5.78116192 | 7.95473082 | 7.57967044 | 7.33175626 |
| 6.271717   | 5.8078433  | 6.73176976 | 6.41667662 | 7.98032069 | 7.65084568 | 7.66084664 |
| 6.25554322 | 6.02889421 | 6.31736775 | 6.16311406 | 7.09421284 | 7.0894865  | 7.37267269 |
| 7.86790388 | 7.41945799 | 8.14779918 | 7.01854182 | 9.84631278 | 9.62810374 | 9.78412163 |
| 5.784482   | 5.6430853  | 6.45261438 | 5.8060064  | 6.87143463 | 6.96695067 | 7.70784294 |
| 6.54872837 | 6.32121198 | 6.31547113 | 6.41722232 | 7.25632099 | 7.47898474 | 6.84656477 |
| 5.79475999 | 5.50111299 | 6.33727008 | 5.72088913 | 7.318494   | 6.95984665 | 7.61267686 |
| 5.85263337 | 5.60584157 | 6.08160678 | 5.67719419 | 7.34339805 | 6.80321929 | 7.55602393 |
| 7.16619924 | 7.02482496 | 8.31698653 | 7.11185032 | 10.3917548 | 10.8297338 | 9.8414527  |
| 6.67037583 | 5.74827257 | 6.85201882 | 6.1443605  | 8.13066322 | 6.69371415 | 7.6387523  |
| 6.1629393  | 6.12764545 | 6.75967917 | 6.71436642 | 7.56339307 | 8.60245948 | 7.37550867 |
| 5.31264848 | 5.39398346 | 5.76541699 | 5.33975988 | 6.84830245 | 6.47044153 | 6.44318724 |
| 5.66888272 | 5.73941042 | 6.02276994 | 5.86762346 | 7.85591061 | 7.08397175 | 7.12454734 |
| 11.5911329 | 11.7986994 | 12.6601185 | 12.0371893 | 13.141405  | 12.9453057 | 13.3431232 |

| C036_NS    | C030_NS    | C108_NS    | C119_NS    | C056dup_NS | P008dup_NS | C056_NS    |
|------------|------------|------------|------------|------------|------------|------------|
| 13.5154399 | 13.922275  | 13.7668291 | 14.1381006 | 12.8434114 | 12.6240243 | 13.0998273 |
| 7.41168554 | 8.17614173 | 6.9200765  | 7.19321387 | 7.48314102 | 7.14349954 | 7.47058404 |
| 7.61636578 | 7.03870614 | 7.73981031 | 7.80498348 | 7.50979717 | 6.89762646 | 7.44644483 |
| 7.92847219 | 7.94091845 | 7.25197183 | 8.00081974 | 6.67123817 | 6.99280015 | 6.46873188 |
| 7.47822034 | 7.35543303 | 7.92463854 | 8.58112901 | 6.20948086 | 6.18470975 | 6.08029567 |
| 9.3356514  | 9.10862717 | 8.43156906 | 8.36776069 | 6.89684944 | 6.65685099 | 6.97633958 |
| 7.82148254 | 7.65599861 | 7.68098183 | 8.01205014 | 6.65534467 | 6.11011932 | 6.58891098 |
| 6.7840642  | 6.45658112 | 6.8103287  | 6.98220415 | 6.17651327 | 5.88351232 | 6.02547691 |
| 8.53498486 | 8.04859858 | 8.43155026 | 8.92860661 | 7.13111717 | 7.26131172 | 7.00409909 |
| 6.88034024 | 6.48372373 | 6.90641563 | 6.9677381  | 6.55827223 | 6.37757409 | 6.61576072 |
| 8.09957768 | 7.55700871 | 7.90505721 | 7.81323415 | 7.21060316 | 7.10251852 | 7.19818472 |
| 9.5483821  | 8.98953472 | 8.62192549 | 9.15678845 | 8.19667048 | 7.3883368  | 7.99311615 |
| 7.3651816  | 7.57703827 | 7.30667784 | 7.59773526 | 7.63354601 | 7.76239533 | 7.7414326  |
| 8.16140855 | 7.69546634 | 7.99735169 | 8.06907162 | 7.5801485  | 7.10523492 | 7.45673552 |
| 8.23860011 | 7.11961556 | 7.06269811 | 7.64958816 | 6.59141329 | 6.69203517 | 6.62275806 |
| 8.4107405  | 7.63699503 | 7.66031828 | 7.71264599 | 7.26733635 | 7.03728337 | 7.27434833 |
| 7.62632232 | 7.57039993 | 7.75104857 | 8.61590546 | 7.72783607 | 7.0297179  | 7.58070252 |
| 7.93057    | 7.49069367 | 7.66115957 | 8.27346787 | 8.04473563 | 7.66240349 | 7.9714763  |
| 6.39603187 | 5.98250651 | 6.52200975 | 6.33494274 | 5.74980589 | 5.67771401 | 5.64633204 |
| 7.86825586 | 7.1670297  | 7.46644522 | 7.15297737 | 6.43063286 | 6.23922827 | 6.39756135 |
| 8.49809566 | 8.58066258 | 9.0644445  | 8.60398011 | 7.76339896 | 7.96382031 | 8.1166096  |
| 6.71123195 | 6.35634333 | 6.44572224 | 6.56827248 | 5.93211008 | 5.62205153 | 5.61616858 |
| 9.63779262 | 9.01021534 | 8.87561913 | 9.071221   | 7.60965229 | 7.65431595 | 7.85511639 |
| 13.0319107 | 13.263249  | 12.5602934 | 12.7465234 | 11.8876437 | 11.356239  | 11.9959932 |
| 13.2940434 | 13.2498764 | 13.6059343 | 13.5363869 | 11.4338885 | 11.6118608 | 11.8003438 |
| 6.56774348 | 6.55334729 | 6.76594708 | 6.7933575  | 6.08975618 | 5.64003839 | 5.99033205 |
| 14.2192343 | 14.1265666 | 14.8025184 | 14.655353  | 13.633262  | 13.5608857 | 13.8840656 |
| 9.59662865 | 8.59209856 | 8.48845476 | 8.71117756 | 7.67331756 | 8.00080735 | 7.58715268 |
| 8.96559528 | 9.10759242 | 8.62870179 | 9.01136956 | 6.90976711 | 6.62306677 | 7.16185947 |
| 10.9265036 | 10.9521027 | 11.2382142 | 11.374307  | 9.66146637 | 9.57796804 | 9.36676545 |
| 14.7300657 | 14.483036  | 15.2731542 | 14.9537395 | 13.8034914 | 13.6531642 | 14.0973894 |
| 13.3201744 | 13.3239808 | 13.4511081 | 13.412026  | 12.5187756 | 11.8793037 | 12.6621329 |
| 7.48895438 | 6.89104121 | 6.98580324 | 6.99462498 | 6.11619235 | 6.01232843 | 5.64836506 |
| 8.31356513 | 8.93069417 | 8.45663738 | 9.00753191 | 7.95386759 | 7.75314052 | 8.28420271 |
| 6.22086119 | 5.75819736 | 6.354358   | 6.23680944 | 5.75311885 | 5.39126422 | 5.43476432 |
| 12.9799719 | 12.9926571 | 12.9878301 | 13.2275123 | 11.9077169 | 11.2850438 | 12.0411417 |
| 10.0168612 | 10.2432418 | 9.93447463 | 10.6823828 | 9.19910202 | 8.74887176 | 9.81084007 |
| 10.8152744 | 10.4851028 | 9.99154594 | 9.88775951 | 8.79536598 | 8.18335947 | 8.94978091 |
| 6.73945795 | 6.88535716 | 6.81967712 | 6.98174308 | 6.65291379 | 5.88408967 | 6.4832739  |
| 7.33655922 | 7.75176564 | 7.61185475 | 7.80155511 | 6.80588443 | 6.72705594 | 6.97107906 |
| 10.3699888 | 10.5592012 | 9.89443097 | 10.3844524 | 9.33665674 | 8.94242595 | 9.34006884 |
| 9.25652079 | 9.46277443 | 9.05075553 | 8.58803697 | 8.7135642  | 8.43159998 | 8.75531424 |
| 7.99452316 | 7.06279091 | 7.40604595 | 7.03686924 | 6.54774517 | 6.41418324 | 6.45781555 |
| 8.12238593 | 8.27735715 | 7.15926487 | 8.25258455 | 7.79701233 | 7.19448306 | 7.685889   |
| 7.25580095 | 6.94746629 | 6.94045456 | 6.98486957 | 6.34271296 | 6.07881048 | 6.08081327 |
| 10.3275538 | 9.99884425 | 9.8259527  | 10.0999066 | 9.29701919 | 8.83392737 | 9.37621049 |
| 7.76412451 | 7.76187564 | 7.42402768 | 8.00481484 | 7.86168682 | 7.1400557  | 7.94306861 |

|            |            |            |            |            |            |            |
|------------|------------|------------|------------|------------|------------|------------|
| 7.83449317 | 7.9012549  | 7.6157363  | 8.04928007 | 7.32201916 | 6.80993015 | 7.34424353 |
| 7.89030563 | 7.60617866 | 7.29009444 | 7.90521309 | 6.98894367 | 7.24471109 | 6.78720389 |
| 10.8659026 | 11.2457161 | 11.2016032 | 10.8611055 | 10.1129777 | 9.16341042 | 10.1084905 |
| 11.4421126 | 11.5568427 | 11.3105185 | 11.4497099 | 10.3290866 | 10.1151269 | 10.4257687 |
| 8.12415285 | 7.81278763 | 7.84264514 | 7.70166341 | 7.49830114 | 7.25095116 | 7.2785842  |
| 6.76441384 | 7.12534734 | 6.88675132 | 7.33983219 | 7.19230071 | 6.22361755 | 6.77917566 |
| 15.1663997 | 14.8414892 | 15.2433332 | 15.2742777 | 14.231477  | 14.3069802 | 14.3288243 |
| 8.02160187 | 7.99425782 | 8.65899654 | 9.26833801 | 7.2465525  | 6.97416217 | 7.34959086 |
| 6.32786248 | 6.20637246 | 6.50700538 | 6.5194032  | 6.50124502 | 6.25107712 | 6.32394087 |
| 9.94828838 | 9.99834502 | 9.87700937 | 10.0627154 | 9.35804477 | 8.32641511 | 9.50359958 |
| 6.76736348 | 6.40767464 | 6.64860062 | 6.57344103 | 6.11434578 | 5.77323971 | 5.89865362 |
| 8.91531384 | 8.56600531 | 8.76346204 | 8.49419877 | 7.69806008 | 7.56999759 | 7.80769752 |
| 10.8176137 | 10.1666929 | 10.2377167 | 10.8710412 | 9.457646   | 9.1206381  | 9.43346464 |
| 9.19704808 | 8.24513909 | 8.66312185 | 8.51877077 | 7.51639737 | 6.5689016  | 7.75325085 |
| 8.32437769 | 9.06300348 | 8.05089997 | 9.07470639 | 7.59165623 | 7.34779763 | 7.57314045 |
| 10.3868918 | 10.3826424 | 9.69903327 | 9.80695925 | 9.36412415 | 8.38670578 | 9.34400312 |
| 8.51979978 | 7.36872296 | 8.09739589 | 8.172881   | 6.85703049 | 6.69718861 | 6.88201204 |
| 7.17205241 | 7.30272299 | 6.67397753 | 6.95012076 | 6.30746423 | 5.86357005 | 6.07732676 |
| 8.33001917 | 8.13826873 | 9.00455476 | 8.36385397 | 7.07254639 | 7.04600205 | 7.33001514 |
| 9.82141542 | 10.0193572 | 10.1877059 | 10.3587896 | 9.19623302 | 8.63335165 | 9.10291581 |
| 7.80729374 | 8.15457562 | 7.63614969 | 7.95464417 | 6.7844608  | 6.58863144 | 6.99812779 |
| 12.5690066 | 12.7921566 | 12.3961638 | 12.6815714 | 11.8063249 | 11.3343817 | 11.5799513 |
| 9.86984951 | 9.75561618 | 9.77249405 | 9.73447593 | 7.87325154 | 7.79757204 | 8.04560351 |
| 9.33958682 | 9.38462814 | 8.65252199 | 8.72311618 | 8.41119191 | 7.86716938 | 8.43667574 |
| 10.2042789 | 9.63284256 | 9.52887113 | 9.94352052 | 8.35277176 | 8.17522867 | 8.62858917 |
| 8.46361224 | 8.85792005 | 9.67871104 | 9.73867125 | 9.15987941 | 8.87781816 | 9.19387029 |
| 8.61244208 | 8.11998691 | 8.40906842 | 8.49448802 | 7.10451803 | 6.9690434  | 7.20836411 |
| 9.52049631 | 9.23818187 | 9.26632555 | 8.29254941 | 8.57636605 | 7.89135964 | 8.55470587 |
| 10.7495326 | 10.7690849 | 10.309266  | 10.2469828 | 8.95037218 | 8.87507845 | 9.09632195 |
| 7.10601847 | 8.94604098 | 7.00683321 | 6.95759776 | 6.21776852 | 6.16663612 | 6.10834233 |
| 9.67614238 | 9.64842661 | 9.12875221 | 9.1629839  | 8.18940058 | 7.72544602 | 8.161147   |
| 9.88125639 | 10.136117  | 9.84044451 | 9.84911184 | 7.96393876 | 7.81035505 | 8.48829126 |
| 10.7315498 | 10.5582791 | 10.1871702 | 10.2841092 | 8.96623116 | 8.56524606 | 9.10218858 |
| 6.67323698 | 6.90817643 | 7.88567014 | 7.60828218 | 7.02924968 | 6.92698263 | 6.86981713 |
| 9.55932642 | 9.55482365 | 9.34111492 | 9.59024439 | 8.60252963 | 7.61158922 | 8.41541897 |
| 6.54589132 | 6.40851657 | 6.66133204 | 6.63350924 | 5.99532939 | 6.04259531 | 5.62053656 |
| 8.82876548 | 7.69686184 | 7.70343367 | 8.06030251 | 6.90855234 | 6.77610794 | 6.82626628 |
| 8.13908112 | 7.61907475 | 8.44501692 | 8.06896364 | 8.13608934 | 7.41255969 | 8.14398466 |
| 14.3536086 | 14.2052602 | 14.1210737 | 14.0975787 | 12.7320347 | 12.4484351 | 13.0704142 |
| 11.3139646 | 10.9075314 | 10.7719153 | 10.5698575 | 9.98782961 | 9.11279317 | 9.98006673 |
| 6.1593222  | 7.91672384 | 8.45662588 | 8.07761741 | 7.53436203 | 5.4678142  | 7.53530104 |
| 10.0054267 | 9.72796333 | 9.81408621 | 9.83905069 | 8.30053835 | 8.2373988  | 8.57737784 |
| 7.59773079 | 7.69919625 | 7.41172536 | 7.79904974 | 6.86160928 | 6.48491084 | 6.72027847 |
| 8.93370157 | 8.55735418 | 9.59565676 | 10.1094977 | 9.25918467 | 8.92180435 | 9.10065787 |
| 9.14862733 | 9.29194791 | 8.76498999 | 9.20791774 | 8.09305411 | 7.89016516 | 8.22879705 |
| 8.74377682 | 8.47140534 | 7.53644539 | 7.67684989 | 6.42164931 | 6.24219586 | 6.12701621 |
| 10.436014  | 9.48613311 | 9.03605957 | 9.82354016 | 8.131697   | 8.80687953 | 8.18036024 |
| 6.81620673 | 7.08376013 | 6.57316136 | 6.79308173 | 6.29162437 | 5.8520905  | 6.16142478 |

|            |            |            |            |            |            |            |
|------------|------------|------------|------------|------------|------------|------------|
| 8.36142054 | 8.33116104 | 8.69242371 | 8.68333503 | 7.30245615 | 7.31509521 | 7.62752951 |
| 10.0598528 | 10.0564372 | 10.4913531 | 10.4004846 | 8.32436014 | 8.39959025 | 8.84552643 |
| 8.21319562 | 7.26610906 | 8.41377304 | 8.44760771 | 7.34273429 | 7.37334892 | 7.45526885 |
| 9.90480876 | 10.1234606 | 9.7396284  | 10.102208  | 8.75436476 | 8.13522189 | 8.72238883 |
| 13.2963413 | 12.5271217 | 13.0741609 | 13.118417  | 12.0463615 | 11.493185  | 11.9594626 |
| 6.61176669 | 6.34445144 | 6.71341676 | 6.96576928 | 6.45156193 | 6.29365906 | 6.50366199 |
| 8.40863078 | 9.18100562 | 8.48743329 | 9.23987845 | 9.3074365  | 8.66207266 | 9.23267634 |
| 6.82641375 | 6.46340748 | 6.87105015 | 6.97515783 | 6.51294774 | 6.24769344 | 6.39715419 |
| 10.5528641 | 9.74551417 | 9.04430094 | 9.37246854 | 7.86305693 | 6.8204011  | 7.83972281 |
| 12.3225521 | 12.9650611 | 12.727044  | 13.1896396 | 10.3357655 | 10.453035  | 10.5283721 |
| 9.11465983 | 9.09810106 | 9.39090108 | 8.95739026 | 7.70303285 | 7.49809925 | 7.89109044 |
| 11.9703594 | 11.8525494 | 11.5560332 | 11.8197692 | 10.8204822 | 10.4099796 | 10.7319308 |
| 12.2287688 | 12.208467  | 11.7039745 | 12.1812995 | 11.0978465 | 10.3722502 | 11.1495465 |
| 6.69066712 | 7.4996498  | 7.36886174 | 7.60878116 | 7.04288287 | 6.1590737  | 7.07497633 |
| 8.78563196 | 8.1861509  | 7.77941798 | 7.5797632  | 7.17893668 | 7.83688606 | 7.08953417 |
| 9.75783317 | 9.9334524  | 9.40081007 | 10.233084  | 9.19849391 | 8.93837813 | 9.45141967 |
| 6.32999738 | 6.15296075 | 6.64472155 | 6.75417667 | 6.37113192 | 5.84785939 | 6.21164421 |
| 14.327147  | 14.2998248 | 13.5730436 | 13.7614567 | 12.7071167 | 12.1277729 | 12.7973871 |
| 6.70186922 | 6.42912416 | 6.53091816 | 6.38318984 | 5.8642649  | 5.94957368 | 5.4390925  |
| 12.6173942 | 11.8880415 | 11.9169625 | 12.085889  | 9.53491466 | 11.6451504 | 9.81505821 |
| 11.4786923 | 11.7837992 | 11.3277025 | 11.9136958 | 10.6721973 | 10.1580416 | 10.9746641 |
| 12.2029839 | 12.6068223 | 11.8955011 | 12.0343801 | 11.3176868 | 10.7732785 | 11.4135851 |
| 7.45823024 | 7.56324967 | 7.61563332 | 7.61995143 | 6.89740623 | 6.45982159 | 6.88727546 |
| 9.82673469 | 8.77709188 | 9.31351411 | 9.32778211 | 7.37844833 | 7.62373959 | 7.45322371 |
| 6.77693961 | 7.02220134 | 7.04896088 | 7.27984548 | 6.87747556 | 6.67152691 | 7.05029817 |
| 12.175708  | 12.0713692 | 11.4980454 | 11.6254107 | 10.4305874 | 9.76033939 | 10.2852045 |
| 12.0107753 | 11.904886  | 11.8369206 | 12.2384785 | 10.5341414 | 10.0837585 | 10.6818112 |
| 9.66108419 | 9.05492524 | 8.6914888  | 8.99727575 | 7.55633438 | 7.22344862 | 7.52682863 |
| 9.96938796 | 8.2889837  | 7.72119354 | 8.41580218 | 7.65753283 | 7.23030967 | 7.74662382 |
| 11.2068489 | 11.7995245 | 11.1442599 | 11.9655646 | 11.0543411 | 10.7837988 | 11.2004793 |
| 7.61740281 | 7.22711531 | 7.54277188 | 7.52517624 | 6.56734024 | 6.4621541  | 6.48832653 |
| 7.47831743 | 8.06443668 | 8.70993229 | 8.32052845 | 8.19429394 | 7.52775692 | 7.95877715 |
| 12.694354  | 11.9910757 | 12.138499  | 12.532998  | 10.4967969 | 9.88960435 | 10.7962287 |
| 8.44122575 | 8.82106856 | 8.64574849 | 8.50037504 | 7.30468535 | 6.80746956 | 7.36401556 |
| 8.99781514 | 8.32465717 | 8.52635487 | 7.92519777 | 7.29919886 | 7.00242237 | 7.38611771 |
| 12.7416998 | 13.1970961 | 13.063239  | 13.4252067 | 11.7974629 | 11.6717281 | 12.0792251 |
| 7.49583105 | 8.35305638 | 9.31037034 | 8.23010212 | 7.06045384 | 7.74493405 | 7.18995697 |
| 7.79232569 | 8.06440057 | 8.36186265 | 8.01179192 | 8.23529578 | 7.08362293 | 8.18723032 |
| 13.0293174 | 12.3890613 | 12.5699325 | 12.7231688 | 11.5366023 | 11.1970901 | 11.4274511 |
| 8.50248496 | 7.83267802 | 8.11203492 | 8.06833707 | 7.17528506 | 6.71134485 | 7.26205819 |
| 8.33895026 | 8.4353869  | 8.90638677 | 8.90740867 | 6.97466123 | 6.70510981 | 6.91838981 |
| 8.05466184 | 7.86572585 | 8.4659965  | 8.4759251  | 6.70537804 | 6.66152445 | 6.82129183 |
| 10.1690168 | 10.4708022 | 11.4115094 | 11.4920339 | 10.5609528 | 9.73643542 | 10.6735467 |
| 14.5527111 | 14.4153958 | 14.7381456 | 14.9874839 | 13.2559944 | 13.4126982 | 13.6302125 |
| 8.36433605 | 8.76919386 | 8.50428232 | 9.35192266 | 8.31513054 | 7.98800692 | 8.52969291 |
| 10.8110832 | 10.8111973 | 10.34624   | 10.8061162 | 10.0022904 | 9.12242243 | 10.0073329 |
| 7.47943268 | 7.43743916 | 7.36172538 | 7.87642424 | 6.44512314 | 6.33910157 | 6.61625461 |
| 7.14404535 | 7.25798837 | 7.0535936  | 7.15505095 | 6.69034725 | 6.02037752 | 6.73498323 |

|            |            |            |            |            |            |            |
|------------|------------|------------|------------|------------|------------|------------|
| 6.90742069 | 7.09284909 | 6.97733832 | 7.34929362 | 6.07762905 | 6.26833034 | 5.84642361 |
| 9.68336662 | 10.2844991 | 9.84900015 | 10.2660627 | 9.12384826 | 8.9256473  | 9.33072443 |
| 11.5322614 | 12.4519606 | 11.8065158 | 12.0465374 | 11.8303496 | 11.178892  | 11.7253867 |
| 13.9424394 | 14.1249888 | 13.8360385 | 14.5418541 | 13.6154388 | 13.1804952 | 13.8325963 |
| 8.82254183 | 9.5500624  | 9.53228773 | 9.62100072 | 8.86287598 | 7.73833821 | 8.87286692 |
| 9.6168335  | 8.55507338 | 8.90987239 | 9.01421747 | 7.02845423 | 7.28350883 | 6.97317271 |
| 6.24012978 | 6.52945898 | 6.56452115 | 7.03301106 | 6.53884045 | 6.21889448 | 6.65290232 |
| 12.4084141 | 12.8233123 | 11.7996819 | 12.8210909 | 11.7317531 | 10.9821608 | 12.232214  |
| 10.7986127 | 10.8868649 | 11.2975732 | 11.2795276 | 9.98813079 | 9.39390952 | 10.0243377 |
| 7.33810792 | 7.23299837 | 7.38289806 | 7.29982161 | 6.49460602 | 6.28821883 | 6.26731294 |
| 11.9096246 | 12.2276436 | 11.4016465 | 12.0614563 | 10.9970418 | 10.5413745 | 11.2835763 |
| 8.71371471 | 8.80016802 | 8.45913403 | 8.76458269 | 7.86105278 | 7.84831935 | 7.77017691 |
| 9.49999812 | 9.9321322  | 9.239804   | 9.79986295 | 8.77216081 | 8.50600602 | 9.30915708 |
| 6.33062616 | 6.40928163 | 6.99951977 | 6.97196308 | 6.58579632 | 5.85264011 | 6.43323022 |
| 15.0533855 | 14.9510042 | 15.296747  | 15.2911214 | 14.4255202 | 14.3391527 | 14.5988155 |
| 8.01982143 | 7.96384689 | 7.69219353 | 7.70856318 | 6.65358172 | 6.18036531 | 6.77744996 |
| 6.77766562 | 7.77010818 | 6.80172646 | 7.94202238 | 7.24446945 | 6.84649332 | 7.42765226 |
| 8.55049747 | 7.90688098 | 7.89919739 | 7.78747687 | 6.85129055 | 6.61440685 | 7.0057907  |
| 9.31308165 | 10.5033577 | 8.82166462 | 10.0807922 | 8.96570378 | 9.41964528 | 9.18852901 |
| 6.26703384 | 6.22940142 | 6.45962424 | 6.66488527 | 6.50616427 | 5.77143295 | 6.15110769 |
| 12.536938  | 12.5776236 | 12.130345  | 12.1411466 | 10.8806442 | 10.3151892 | 11.1487543 |
| 9.5357746  | 9.88018348 | 9.65368651 | 9.82588148 | 8.89151762 | 8.1487806  | 8.77997734 |
| 8.28247965 | 7.83203743 | 8.27662507 | 8.48374122 | 7.77504066 | 7.38742286 | 7.74296823 |
| 7.42241888 | 7.57390693 | 7.14123045 | 7.46651619 | 6.80390766 | 6.49724893 | 6.81887356 |
| 6.60641809 | 6.82150742 | 6.75761936 | 7.08883911 | 6.95012776 | 7.42605672 | 7.18115027 |
| 7.61535597 | 7.5777045  | 8.52444886 | 7.99283526 | 7.80628023 | 7.47590282 | 7.71218924 |
| 14.8748157 | 15.0321422 | 14.9447972 | 15.3263607 | 14.2335613 | 13.9007234 | 14.4149554 |
| 6.51390916 | 6.17504109 | 6.92798176 | 6.56982068 | 6.23814121 | 5.70968903 | 6.07889671 |
| 7.29851902 | 7.22257854 | 6.96749604 | 7.4852964  | 6.9258962  | 6.58699887 | 6.90469724 |
| 6.37263595 | 6.82976205 | 6.95916852 | 6.95007993 | 6.22052305 | 5.70811825 | 6.20582159 |
| 12.9808702 | 13.1010466 | 13.0502041 | 13.7281299 | 12.327618  | 11.7485304 | 12.6385346 |
| 9.0240412  | 8.99651134 | 9.03980957 | 8.96327586 | 8.18664664 | 7.75645758 | 8.29400127 |
| 8.59552902 | 8.07712227 | 8.99416814 | 9.50672034 | 7.44832283 | 7.17163919 | 7.55981681 |
| 6.22570161 | 7.1043094  | 7.17685132 | 7.16510296 | 6.40085007 | 5.74070256 | 6.09809758 |
| 6.75524012 | 6.67270113 | 6.80143547 | 6.87838694 | 6.06864588 | 5.81868775 | 5.85205404 |
| 13.0766954 | 12.582162  | 12.3055984 | 12.3303875 | 11.3196586 | 10.6291872 | 11.3980596 |
| 8.34812351 | 8.81131528 | 9.27926397 | 9.36805285 | 8.5188455  | 7.5027801  | 8.64269291 |
| 10.6689683 | 10.7010604 | 10.9017878 | 10.806237  | 9.46487223 | 9.22258144 | 9.72011717 |
| 11.2458522 | 11.8842698 | 11.5553958 | 12.134356  | 9.48135223 | 9.29131439 | 10.0880422 |
| 7.08630716 | 6.77451431 | 6.70713132 | 6.76709064 | 6.07994573 | 5.77456886 | 5.87935289 |
| 7.04360589 | 7.15438574 | 7.12637615 | 7.24909828 | 6.40205121 | 6.06058181 | 6.39405397 |
| 8.72847089 | 8.67970599 | 6.97328868 | 8.40835989 | 7.46278199 | 7.80325223 | 7.41243859 |
| 10.2601104 | 10.4751903 | 9.77223341 | 9.84669373 | 9.97953095 | 8.74667185 | 9.95255533 |
| 8.02730724 | 7.94632499 | 7.49838492 | 7.65408534 | 7.19781233 | 6.85535813 | 7.22125166 |
| 10.0204953 | 9.86118014 | 10.5668542 | 10.2121231 | 8.86272258 | 8.75685684 | 8.9532437  |
| 9.2839588  | 9.31618603 | 9.64363328 | 9.44621197 | 8.31606109 | 7.98419285 | 8.54806434 |
| 7.76457241 | 8.09722943 | 7.81005166 | 8.38807758 | 7.80488154 | 7.51070879 | 7.85931611 |
| 6.4892963  | 6.2185828  | 6.59575949 | 6.50169884 | 5.91369008 | 5.70494913 | 5.83919144 |

|            |            |            |            |            |            |            |
|------------|------------|------------|------------|------------|------------|------------|
| 7.64219614 | 7.40308789 | 7.36313515 | 7.79431059 | 7.11270535 | 6.97705663 | 7.01266253 |
| 13.6840637 | 13.3792416 | 13.3209345 | 13.4809972 | 11.3797087 | 11.3756032 | 11.7704562 |
| 10.8876966 | 11.3375712 | 11.1645286 | 11.4913085 | 9.91674518 | 9.86110645 | 10.1164466 |
| 14.6472943 | 14.641069  | 14.2461156 | 14.7440402 | 13.8950025 | 13.6305242 | 14.1878662 |
| 13.4020128 | 13.0230311 | 12.8837207 | 13.027306  | 11.5048587 | 11.1340059 | 11.9313865 |
| 11.7423625 | 11.9006623 | 12.2180785 | 12.0375696 | 9.8833132  | 9.96930017 | 10.4377916 |
| 13.376352  | 13.2198474 | 13.1910899 | 13.2840256 | 12.2900125 | 11.7951212 | 12.2722271 |
| 8.30839364 | 7.72165018 | 7.87124117 | 8.10918502 | 6.95852256 | 6.72919382 | 6.84792051 |
| 7.57612906 | 7.47950706 | 7.31444911 | 7.64523763 | 6.92874931 | 6.72683258 | 6.7562067  |
| 9.80397835 | 10.4889538 | 9.0691283  | 9.53849393 | 8.68469042 | 6.71805607 | 8.54612855 |
| 9.59215987 | 9.88145845 | 9.04402165 | 9.86540867 | 8.64952277 | 8.35804323 | 9.1020589  |
| 12.6324816 | 13.3475729 | 13.5534337 | 13.7575171 | 13.0658348 | 12.1504832 | 13.0121631 |
| 9.68406498 | 9.85561057 | 9.94395545 | 10.5070592 | 9.41960525 | 8.91566072 | 9.59923279 |
| 6.61904451 | 6.59775433 | 7.00161874 | 6.9595905  | 6.7119794  | 5.90781555 | 6.55332471 |
| 7.37129574 | 8.1039665  | 7.99382435 | 8.55913423 | 9.55845286 | 8.55660032 | 9.4785579  |
| 8.2001095  | 7.71447427 | 7.45660658 | 7.34306665 | 7.00994839 | 6.15202092 | 6.94567207 |
| 13.8692989 | 13.8820077 | 13.8501214 | 13.9621875 | 12.6648643 | 11.7174708 | 12.6802747 |
| 6.38008906 | 6.28751219 | 6.59039363 | 6.56328354 | 6.00954067 | 5.81085565 | 5.81224714 |
| 8.09059147 | 8.55509524 | 8.66038852 | 8.75493459 | 8.15551347 | 7.6315576  | 8.17160016 |
| 9.97037772 | 10.1317657 | 9.71626336 | 9.79827316 | 8.87916662 | 7.9098037  | 8.79823979 |
| 6.69483702 | 6.49827688 | 6.76784677 | 6.91837908 | 6.99192087 | 6.41754791 | 7.02628551 |
| 6.79176069 | 6.78470812 | 8.65195937 | 6.61693341 | 5.98250834 | 6.05893747 | 5.87077626 |
| 9.96085889 | 9.49424899 | 8.78874574 | 8.30876131 | 7.86036693 | 7.45803333 | 7.60431378 |
| 8.36144598 | 7.60750121 | 7.82145831 | 8.11648277 | 6.52654775 | 6.42519794 | 6.73217964 |
| 8.01629128 | 7.77215157 | 7.61506827 | 7.91091371 | 7.3244479  | 6.714431   | 7.28426519 |
| 11.4722568 | 11.2887052 | 11.0794988 | 11.8133299 | 10.6731589 | 9.70350531 | 10.9098653 |
| 10.5659065 | 11.2565012 | 10.0949789 | 11.1505762 | 10.5020441 | 9.64345561 | 10.6616864 |
| 11.2267409 | 11.3091836 | 10.3237236 | 11.3803821 | 10.2265001 | 9.69733146 | 10.6560646 |
| 9.62860174 | 9.30342711 | 9.423825   | 8.79203345 | 8.50348669 | 7.93731614 | 8.46673763 |
| 8.65532929 | 9.02342559 | 8.5530425  | 9.22076549 | 7.74021926 | 8.16772572 | 7.94577389 |
| 12.7832567 | 12.4788798 | 12.2748566 | 12.4063108 | 11.1740468 | 10.6617612 | 11.2144333 |
| 6.43956762 | 6.38297153 | 6.63210765 | 6.69655726 | 6.26057899 | 6.02795398 | 6.10397762 |
| 10.0355511 | 10.0762785 | 9.95110371 | 10.0571483 | 9.19348766 | 8.1521961  | 9.37462699 |
| 9.09209536 | 9.42193248 | 9.55889592 | 9.51901501 | 8.87118017 | 7.8506613  | 8.90068057 |
| 7.72942361 | 7.42166008 | 7.4890114  | 7.61031619 | 7.12245634 | 6.5070931  | 7.06258263 |
| 7.34615556 | 7.20645276 | 7.02456348 | 7.15890855 | 6.5005986  | 6.27747748 | 6.27864812 |
| 10.6532956 | 10.1796914 | 10.1110248 | 9.81434518 | 8.88674248 | 8.59504447 | 8.97524526 |
| 12.6768192 | 12.1705088 | 11.6429204 | 11.8643645 | 9.6832945  | 9.75914401 | 10.0705248 |
| 14.9437826 | 14.8008761 | 15.1384094 | 15.3506126 | 14.0686011 | 13.8202388 | 14.325862  |
| 11.7763816 | 11.1982081 | 11.2193452 | 11.4819694 | 10.9437507 | 10.1735535 | 10.7861634 |
| 6.82261544 | 6.86168248 | 6.95567315 | 7.32913526 | 6.83279383 | 6.36287785 | 6.59112002 |
| 9.80543741 | 9.75421927 | 9.80096136 | 9.97775073 | 9.30312134 | 9.37716454 | 9.16607243 |
| 7.40913123 | 7.38864591 | 7.51802677 | 7.55578395 | 7.39038911 | 7.16148665 | 7.25513152 |
| 14.7547544 | 14.4422185 | 14.2206496 | 14.4486061 | 13.3961927 | 12.8918014 | 13.5071319 |
| 9.61342115 | 9.33402339 | 8.85177215 | 9.56287108 | 9.74078087 | 9.09183125 | 9.72791042 |
| 10.1191785 | 10.3607242 | 10.4211812 | 10.7279672 | 10.2026479 | 9.64887668 | 10.3235221 |
| 7.2408333  | 7.59735984 | 7.35679175 | 7.1732134  | 6.52132169 | 6.20062048 | 6.47007151 |
| 11.5681913 | 11.5868374 | 11.3264508 | 11.4133852 | 9.63276624 | 9.34425862 | 9.93528294 |

|            |            |            |            |            |            |            |
|------------|------------|------------|------------|------------|------------|------------|
| 7.19815918 | 7.65703113 | 7.85282723 | 7.58348373 | 6.69073695 | 6.43880832 | 6.51907982 |
| 15.0585093 | 14.9066962 | 15.2552381 | 15.3938141 | 14.6052891 | 14.1258913 | 14.8643937 |
| 11.1080049 | 11.4806271 | 11.7970633 | 13.5194593 | 12.2470505 | 8.06820485 | 12.3237168 |
| 12.0151087 | 12.0797098 | 11.9974043 | 12.3622299 | 10.9918187 | 10.8695769 | 11.315436  |
| 9.93234336 | 8.6382194  | 9.25645875 | 9.67458847 | 9.341459   | 8.67457293 | 9.32007056 |
| 10.4147254 | 10.3364664 | 10.1793568 | 10.5222323 | 8.06776777 | 7.78232862 | 8.14625248 |
| 7.88995716 | 8.17582646 | 7.79637128 | 8.43339057 | 7.23713537 | 7.0849221  | 7.21570869 |
| 11.8326654 | 12.1792722 | 13.3650415 | 12.4653368 | 12.0826411 | 11.9008619 | 12.0335813 |
| 8.39956975 | 6.33682091 | 6.76817374 | 6.80609588 | 6.16282674 | 5.8303712  | 6.07174573 |
| 6.95164957 | 7.04909271 | 7.18593888 | 7.3141672  | 6.848494   | 6.36713374 | 6.66921248 |
| 6.36182099 | 6.40687999 | 6.47690413 | 6.7879352  | 6.93518038 | 6.45297326 | 6.90353966 |
| 6.52490288 | 7.06419522 | 6.56197508 | 7.21388479 | 7.43348529 | 7.1114247  | 7.46909801 |
| 13.080441  | 13.7218554 | 12.2281925 | 13.3193758 | 12.6719877 | 12.1972984 | 12.4476562 |
| 8.32181042 | 9.23967657 | 9.21340707 | 9.50096812 | 9.27247583 | 8.89461529 | 9.19953862 |
| 9.43666803 | 9.49080716 | 8.89913725 | 9.49079193 | 7.57059347 | 7.69586301 | 7.66491513 |
| 11.3672067 | 11.1262857 | 10.2307002 | 11.0910175 | 9.532323   | 9.30903154 | 10.0447848 |
| 12.209952  | 12.6718646 | 11.6816048 | 11.9757355 | 11.3387392 | 9.97126189 | 11.2820256 |
| 7.09461929 | 6.75503978 | 7.31060006 | 7.28715089 | 7.08827519 | 5.93336939 | 7.03916691 |
| 10.7977045 | 10.6654123 | 10.1234024 | 10.5300229 | 8.73869962 | 8.54330641 | 9.05166275 |
| 6.85793622 | 7.05307114 | 6.93559411 | 7.08039012 | 6.36401818 | 6.08968288 | 6.5223692  |
| 14.9960219 | 14.759263  | 15.0328563 | 14.9456249 | 13.7550461 | 14.0405569 | 14.1218807 |
| 9.03324733 | 9.34363056 | 8.92228914 | 9.43604188 | 7.9717746  | 8.11091129 | 8.59284793 |
| 6.72638984 | 7.46978425 | 6.839748   | 6.95698244 | 6.21828482 | 5.93885434 | 5.91383701 |
| 7.86751845 | 7.57288588 | 7.55703552 | 7.71916632 | 7.00955992 | 6.87942764 | 7.03926892 |
| 14.0800922 | 13.8225469 | 14.4985607 | 14.3347879 | 12.4502117 | 12.4689226 | 12.8855189 |
| 8.95746804 | 10.0896319 | 8.18013443 | 9.69798974 | 9.42313503 | 9.26097715 | 9.29809305 |
| 6.87573092 | 6.81011787 | 6.66246046 | 6.86280595 | 5.91003129 | 6.08875878 | 5.72663915 |
| 6.28185698 | 7.42365968 | 7.35949833 | 7.63047974 | 6.70961598 | 5.67328872 | 6.52886508 |
| 9.50258421 | 9.25711106 | 9.50847104 | 9.58529646 | 7.5396753  | 7.40724737 | 7.86618967 |
| 8.93281681 | 9.62637452 | 9.13375487 | 9.23861134 | 9.25793182 | 8.91905548 | 9.05183402 |
| 8.70558643 | 9.48850657 | 8.27586935 | 9.31040397 | 9.33405245 | 8.6284645  | 9.04912239 |
| 6.38695369 | 6.62060694 | 6.70308547 | 6.89921552 | 6.22257371 | 5.73717757 | 6.22909605 |
| 9.52275041 | 10.1313541 | 9.88024227 | 9.39153403 | 9.07986421 | 8.52857991 | 9.12031202 |
| 7.74691466 | 7.54102303 | 7.94513654 | 7.58218715 | 7.27200452 | 6.56985181 | 7.48871262 |
| 8.81159786 | 8.82945542 | 8.80004762 | 8.77333606 | 7.7684113  | 7.59586539 | 7.67210282 |
| 7.2975537  | 7.47515624 | 7.30181991 | 7.89976596 | 7.2210109  | 6.78437965 | 7.19863755 |
| 6.43455367 | 6.22669406 | 6.88727546 | 6.91114627 | 6.45318354 | 6.2368961  | 6.54679895 |
| 7.62406945 | 7.19402498 | 7.33663688 | 7.2399956  | 6.895923   | 6.98225208 | 6.69680482 |
| 10.451923  | 10.476731  | 10.5885591 | 10.5476311 | 9.83411705 | 9.12147576 | 9.65474235 |
| 11.4721039 | 10.7896608 | 11.8619608 | 11.6587515 | 9.81917958 | 9.53724927 | 9.98545916 |
| 6.89623915 | 7.16287064 | 6.86068848 | 7.20828314 | 6.36654551 | 6.0536466  | 6.47074346 |
| 6.50521768 | 6.70505589 | 6.71688529 | 7.09821636 | 6.35910541 | 6.10634895 | 6.33118783 |
| 7.97626797 | 7.7429561  | 8.2462152  | 8.05273704 | 7.02885753 | 6.64669838 | 7.04771832 |
| 7.4478767  | 6.56847543 | 8.1827062  | 8.13558515 | 6.57224819 | 6.18150691 | 6.73168696 |
| 6.92890324 | 6.37593849 | 6.59331059 | 6.69444565 | 5.812768   | 5.66301978 | 5.64295105 |
| 12.8097336 | 12.7189877 | 12.903127  | 13.3867274 | 11.4613577 | 11.131185  | 12.1614617 |
| 11.06547   | 11.7445526 | 10.4386276 | 10.7688179 | 8.06702341 | 7.84488023 | 8.5150071  |
| 10.137793  | 9.83645296 | 10.2189603 | 10.0497628 | 9.09676179 | 8.673838   | 9.00042119 |

|            |            |            |            |            |            |            |
|------------|------------|------------|------------|------------|------------|------------|
| 9.59141089 | 9.57222594 | 10.0105435 | 9.7681964  | 9.20798507 | 8.1237562  | 9.24505469 |
| 11.5599841 | 11.9588097 | 11.7971022 | 12.1373021 | 11.0875809 | 10.7796381 | 11.2409827 |
| 7.49766825 | 7.20323738 | 7.26780263 | 7.25769615 | 6.25807584 | 6.11021121 | 6.18156217 |
| 9.71963627 | 9.69192982 | 9.41953489 | 9.80238453 | 9.25545423 | 8.2660144  | 9.11064277 |
| 8.21623707 | 8.73112655 | 8.61451698 | 8.72209984 | 7.73876378 | 7.09669091 | 7.68469533 |
| 6.53179924 | 6.35991872 | 6.68478508 | 6.64786132 | 5.74086875 | 8.7346954  | 5.86810594 |
| 6.95732264 | 7.91240976 | 7.56325882 | 8.04891349 | 7.01323333 | 6.91362427 | 7.12653206 |
| 10.9358494 | 10.7242751 | 10.7381142 | 10.4631851 | 10.3139192 | 9.66718731 | 10.1362298 |
| 9.57049063 | 9.41765656 | 9.80479961 | 9.85573016 | 8.84217903 | 8.43684935 | 8.90709556 |
| 8.27743434 | 7.71622203 | 7.57238342 | 7.29918878 | 6.68173598 | 6.52020614 | 6.50998904 |
| 8.10954183 | 7.7077836  | 7.56032978 | 7.74359912 | 6.60144263 | 6.37703262 | 6.67815644 |
| 6.75115974 | 6.96136519 | 6.62144854 | 7.05154938 | 5.95428938 | 5.96171384 | 6.09824184 |
| 11.2453376 | 11.5607355 | 10.9123512 | 11.7767324 | 10.0236698 | 9.71768842 | 10.0170241 |
| 8.74122292 | 8.78447388 | 8.81057196 | 9.2498928  | 7.85294267 | 7.45905942 | 8.34221115 |
| 11.2739774 | 11.2499987 | 11.7060401 | 11.4285743 | 8.92974633 | 9.27487384 | 9.5295471  |
| 6.22860073 | 7.06758279 | 7.36981979 | 7.09632722 | 6.68781516 | 5.57512018 | 6.71213902 |
| 6.56249216 | 6.92255348 | 6.98473744 | 7.90618892 | 6.38397121 | 6.38637124 | 6.66252882 |
| 11.9231165 | 11.8271378 | 12.241842  | 11.4058334 | 10.697077  | 10.2683139 | 10.8435631 |
| 10.0150958 | 9.68633401 | 9.64179672 | 9.76729295 | 8.99530191 | 8.03894532 | 9.07746306 |
| 13.0389091 | 12.5756291 | 12.6596078 | 13.0209834 | 11.5704625 | 11.3720526 | 11.4510236 |
| 6.16420079 | 5.83069494 | 3.28703842 | 3.3314358  | 6.45995024 | 6.21419923 | 6.31623193 |
| 6.68706629 | 6.2234741  | 6.64675022 | 6.42780074 | 5.83888346 | 5.88247261 | 5.62948194 |
| 14.5320308 | 14.5015107 | 14.2661138 | 14.7247568 | 13.7568669 | 13.5540696 | 14.1405119 |
| 14.9799583 | 14.6296367 | 14.76334   | 14.8655627 | 14.0603202 | 13.8117078 | 14.2837533 |
| 11.1518379 | 10.6660953 | 10.4128217 | 10.9481022 | 8.22312518 | 9.58176983 | 8.24471442 |
| 6.66215707 | 6.63620538 | 6.78504699 | 6.93206826 | 6.69534384 | 6.26057522 | 6.51256065 |
| 7.82597384 | 8.18139927 | 8.28917695 | 8.45972955 | 7.0375173  | 7.00093182 | 7.18345277 |
| 7.54703718 | 7.52470782 | 7.40674073 | 7.73150301 | 7.08576243 | 6.56224578 | 6.86107201 |
| 8.17353373 | 7.83451277 | 9.0111006  | 8.64253408 | 7.75062526 | 7.62448477 | 7.98613557 |
| 6.62555251 | 6.78758265 | 6.91140637 | 7.6398146  | 6.27921219 | 6.37397388 | 6.22355191 |
| 13.3808533 | 12.8211302 | 13.0622956 | 13.1135665 | 12.0603166 | 11.5861755 | 12.1502011 |
| 11.5943689 | 10.1591978 | 11.1404144 | 11.1477582 | 10.1643501 | 9.33308467 | 10.0399143 |
| 10.6499486 | 11.1954633 | 10.8652152 | 10.7754802 | 9.54474792 | 9.50382534 | 9.74559652 |
| 8.71513147 | 8.92065863 | 8.65203504 | 8.89155832 | 8.25442917 | 7.84413454 | 8.38285916 |
| 9.82287017 | 9.55164713 | 9.5203087  | 9.53470246 | 7.77968128 | 7.59768163 | 7.81624449 |
| 7.92472701 | 8.18806656 | 8.34404108 | 8.26947457 | 7.04795275 | 7.0401823  | 6.93461203 |
| 8.32096613 | 8.43958823 | 8.0223212  | 7.9411339  | 7.55887985 | 7.07818284 | 7.51494755 |
| 9.76432658 | 10.0903731 | 8.85705787 | 9.52186462 | 7.5541744  | 8.05097233 | 7.84363405 |
| 7.07621275 | 6.92333699 | 7.29001424 | 7.57003555 | 6.91697338 | 6.82350099 | 6.92478757 |
| 8.7192656  | 8.41833755 | 8.98704965 | 9.36944729 | 7.06710195 | 7.05152328 | 7.32488619 |
| 10.7590285 | 9.97414352 | 10.5975498 | 10.2727709 | 8.94369867 | 9.16816339 | 8.96209898 |
| 12.6485582 | 12.7244913 | 12.5456861 | 12.5700986 | 10.7636863 | 10.3364865 | 11.3940548 |
| 12.3347805 | 12.005606  | 12.1854952 | 12.371172  | 11.5462535 | 10.8704742 | 11.7176657 |
| 9.59414076 | 10.5614254 | 9.34089936 | 9.23559233 | 8.54640795 | 8.7483616  | 8.81028467 |
| 6.66508431 | 6.45127442 | 7.01100916 | 6.78188424 | 6.26298895 | 5.98371805 | 6.05722215 |
| 7.23831015 | 7.55087297 | 7.8712387  | 7.55962182 | 7.80868043 | 7.1543665  | 7.61913492 |
| 10.5982489 | 10.949667  | 11.9304934 | 12.1769199 | 9.78476684 | 11.031901  | 10.3710164 |
| 8.31722899 | 8.9621901  | 8.73207718 | 9.00528545 | 8.05241209 | 7.1424645  | 8.08639156 |



|            |            |            |            |            |            |            |
|------------|------------|------------|------------|------------|------------|------------|
| 9.22323694 | 8.49000727 | 8.46211573 | 8.39790305 | 7.76813668 | 7.37491254 | 7.76002795 |
| 6.50898287 | 6.56752811 | 6.64012113 | 6.79580071 | 6.63188786 | 6.37173117 | 6.58247185 |
| 7.2465297  | 8.10950317 | 7.54873176 | 8.64284884 | 8.46279385 | 8.55384967 | 8.49206027 |
| 8.87388055 | 8.78657219 | 8.71801358 | 8.95338922 | 8.84291882 | 8.50343461 | 8.89582124 |
| 9.66754517 | 8.41186389 | 8.67337834 | 9.06812905 | 8.02441997 | 7.02090218 | 7.85844358 |
| 12.819186  | 12.6749677 | 12.3032979 | 12.4026369 | 11.5487945 | 10.905666  | 11.4176764 |
| 6.43661161 | 7.58289015 | 7.99446376 | 7.96670904 | 7.73945052 | 5.51539992 | 7.63822592 |
| 9.01629351 | 7.67637109 | 7.74243475 | 8.65882593 | 7.92408385 | 7.03666377 | 7.94177538 |
| 12.3833474 | 12.640838  | 12.1685324 | 12.8423016 | 11.5860793 | 11.1189372 | 12.0558755 |
| 13.2010527 | 12.9041791 | 12.895608  | 13.1901656 | 12.5309196 | 12.2856421 | 12.4558797 |
| 6.45085889 | 6.93204463 | 7.80549819 | 6.93697237 | 8.42726423 | 7.68643259 | 8.45757172 |
| 7.11891097 | 7.17384101 | 7.01408521 | 7.4700471  | 6.77666332 | 6.15894731 | 6.6323927  |
| 8.4518919  | 7.91649217 | 7.78064737 | 8.41209854 | 7.10216364 | 6.54076443 | 7.06451105 |
| 6.1970765  | 7.24313113 | 6.7979831  | 6.85086817 | 6.48180266 | 5.42041402 | 6.28155082 |
| 10.7461624 | 11.2656906 | 10.8436102 | 11.2681648 | 9.92241849 | 9.73097563 | 10.0971196 |
| 11.1622516 | 11.0079068 | 10.8807659 | 11.0171543 | 10.0669758 | 9.89081146 | 10.1276101 |
| 10.4343832 | 10.6709448 | 10.6450108 | 10.8500063 | 9.2915932  | 9.0155667  | 9.62227187 |
| 10.5314    | 9.83454421 | 10.0548715 | 9.65690943 | 9.24112919 | 9.280893   | 9.21864872 |
| 9.40048712 | 9.93335871 | 8.79858391 | 9.71871866 | 8.49348723 | 8.37552039 | 8.9502281  |
| 13.0795988 | 13.3131268 | 13.1248485 | 13.4981237 | 12.1460563 | 12.0726448 | 12.5654023 |
| 7.00632159 | 6.66623395 | 7.52126436 | 7.70214705 | 6.65905114 | 6.56699928 | 6.49222222 |
| 7.37598383 | 6.98086617 | 7.47232124 | 7.73106374 | 6.43928387 | 6.19533027 | 6.62421219 |
| 7.46481936 | 6.93599477 | 7.43879518 | 7.63232348 | 6.31642527 | 6.76705752 | 6.25962125 |
| 6.61835687 | 6.56516897 | 6.64547975 | 6.86168    | 6.77592101 | 6.09426943 | 6.60714682 |
| 6.93314534 | 7.10599858 | 6.77685805 | 7.06251787 | 6.51853215 | 6.13987915 | 6.61942812 |
| 9.41398856 | 8.79524778 | 8.76211058 | 8.6658088  | 7.89464802 | 7.30756605 | 8.03003861 |
| 11.1324432 | 10.9772506 | 10.2394195 | 10.3723906 | 7.96374923 | 7.95080782 | 8.5529361  |
| 8.31502952 | 8.12482284 | 8.05477957 | 8.38237632 | 7.08435452 | 6.58111274 | 7.4013429  |
| 14.1500765 | 13.6841985 | 13.3875489 | 13.514597  | 11.8939943 | 11.7843735 | 11.9427102 |
| 9.44207845 | 9.31771311 | 9.3348717  | 9.08962606 | 8.38438488 | 8.02851059 | 8.27011028 |
| 8.81768401 | 8.56054187 | 7.95009043 | 7.92712846 | 6.77878549 | 6.70556742 | 6.90604036 |
| 8.44163079 | 7.50551465 | 7.54036288 | 8.08744269 | 7.44434571 | 6.78801353 | 7.32091876 |
| 10.4419835 | 10.3838015 | 10.1125646 | 10.6644615 | 8.34136893 | 7.94926178 | 8.47146753 |
| 7.21998743 | 7.26086121 | 8.92778803 | 8.72176876 | 7.60477708 | 7.00543704 | 7.69741313 |
| 9.13522138 | 9.35252351 | 8.34862902 | 9.30713864 | 8.29345923 | 7.95706372 | 8.50634845 |
| 9.90802117 | 9.63317689 | 9.64727997 | 9.53945624 | 8.92390534 | 8.43165346 | 8.86666848 |
| 6.88565855 | 6.93771985 | 7.20359859 | 6.41817544 | 6.5147464  | 5.93779846 | 6.28393529 |
| 8.58363266 | 7.980917   | 7.5842297  | 8.00907503 | 7.27417685 | 6.54898416 | 7.18300706 |
| 11.1012121 | 11.1251765 | 9.82037078 | 10.8159628 | 9.93788092 | 9.43354121 | 10.1866256 |
| 8.92017567 | 9.29620225 | 8.33649763 | 8.72570878 | 8.03673574 | 7.09348834 | 7.97476963 |
| 9.73722097 | 9.07403627 | 9.12885272 | 9.13069823 | 7.94762116 | 7.44387017 | 7.89018644 |
| 7.32669553 | 7.569128   | 7.25276192 | 7.35704169 | 6.80811214 | 6.58353277 | 6.86284437 |
| 9.69932016 | 9.82616329 | 9.83037006 | 10.4116423 | 9.25965171 | 9.33633918 | 9.5826625  |
| 10.9897273 | 10.7320987 | 10.4182005 | 10.2389409 | 9.55670913 | 9.18236977 | 9.59854144 |
| 9.08013105 | 9.07250432 | 9.47480612 | 9.3616245  | 8.01607673 | 7.70042377 | 7.89912547 |
| 7.06246175 | 7.32058757 | 7.37826364 | 7.42746119 | 7.03040119 | 6.79712066 | 6.88204384 |
| 6.38177428 | 6.48294409 | 6.74584774 | 7.05756291 | 6.90871445 | 6.23711682 | 6.88970959 |
| 8.99692282 | 8.63412819 | 9.28287877 | 8.79835936 | 7.7176682  | 7.77585518 | 7.76798644 |

|            |            |            |            |            |            |            |
|------------|------------|------------|------------|------------|------------|------------|
| 7.57975113 | 8.60905386 | 8.61361121 | 8.78428705 | 8.84709588 | 8.44735025 | 8.7187767  |
| 12.4234718 | 12.2312671 | 11.7077702 | 11.1178671 | 10.9360851 | 9.63282475 | 10.9722827 |
| 6.22087976 | 6.10177213 | 6.67871421 | 6.62200949 | 6.68125669 | 6.4669566  | 6.50795365 |
| 10.5329715 | 11.1399996 | 10.70566   | 10.8343691 | 10.5380172 | 9.33279564 | 10.5024002 |
| 9.32467764 | 8.98336903 | 9.32947032 | 9.11803288 | 7.95755249 | 7.61312938 | 7.86706247 |
| 8.34681377 | 8.03407152 | 7.78012896 | 8.19795432 | 6.96993788 | 6.55205408 | 6.89037251 |
| 9.28071858 | 8.80235092 | 9.67260938 | 9.24542483 | 7.78723916 | 8.11857932 | 7.91224866 |
| 6.94489943 | 6.93692292 | 7.12916966 | 7.43343939 | 6.07551316 | 5.93452759 | 6.05747865 |
| 10.4569396 | 10.4953624 | 10.4540957 | 10.442929  | 8.56021092 | 8.47149558 | 8.80381534 |
| 6.75363529 | 6.52875258 | 6.64520016 | 6.88288878 | 6.35750309 | 5.97947504 | 6.15728286 |
| 9.73811726 | 10.0186564 | 9.77237363 | 9.53218973 | 7.64017985 | 7.81258165 | 8.21289126 |
| 7.68006761 | 7.37855237 | 7.40385225 | 7.30077169 | 7.08456181 | 6.66517529 | 6.92700279 |
| 7.86285925 | 6.67882687 | 7.13505358 | 7.29838614 | 7.03156392 | 6.46430886 | 6.71802866 |
| 8.27614628 | 7.65072148 | 7.50919148 | 7.62657931 | 7.29099752 | 6.22085616 | 7.35913634 |
| 11.9612739 | 12.6462288 | 12.1057815 | 12.1724428 | 12.5754161 | 10.4119579 | 12.5148405 |
| 6.75605855 | 8.33717765 | 7.92662809 | 8.92289506 | 7.77190538 | 6.98058632 | 7.65609732 |
| 12.1973193 | 12.408201  | 12.5021294 | 12.14234   | 10.7522602 | 10.1312101 | 11.1010249 |
| 6.50077959 | 6.66888073 | 7.67341509 | 7.01480272 | 6.38528866 | 5.77645751 | 6.1393686  |
| 9.49596013 | 9.20929812 | 8.86909224 | 8.98178816 | 8.4785395  | 7.90761056 | 8.51567776 |
| 14.7936963 | 14.4936197 | 14.172965  | 14.4604975 | 13.5434173 | 12.5104245 | 13.4092835 |
| 8.59685652 | 8.75980764 | 8.78128987 | 8.2975514  | 8.35401307 | 7.65017073 | 8.20297058 |
| 12.6196725 | 13.1902651 | 12.460848  | 13.1957459 | 11.8812532 | 11.5076331 | 12.5805288 |
| 10.4890833 | 10.5274379 | 9.19922426 | 9.94652019 | 9.07125184 | 8.23423209 | 9.1419615  |
| 13.1838737 | 12.9404045 | 12.6041246 | 12.8099457 | 11.258129  | 10.6328217 | 11.1695167 |
| 10.5249139 | 10.0268001 | 9.79030239 | 10.2230822 | 9.5266479  | 8.19467512 | 9.63262466 |
| 9.69210179 | 9.6032276  | 10.3758486 | 9.79765828 | 8.67281567 | 8.67295989 | 8.91539571 |
| 7.27356904 | 7.96441712 | 7.72743176 | 7.91775098 | 8.75102178 | 6.74112313 | 8.60954334 |
| 10.7399013 | 10.3066712 | 10.1180586 | 10.5588349 | 9.87706798 | 9.47729564 | 9.8018401  |
| 6.0619846  | 5.99227741 | 6.23403488 | 6.62289229 | 6.39776156 | 6.01156519 | 6.26367859 |
| 14.1091777 | 13.5744682 | 12.6501659 | 12.603615  | 11.6412295 | 11.2773234 | 11.7929428 |
| 7.65590705 | 7.81819165 | 7.98831886 | 7.64405815 | 6.42872162 | 6.37243954 | 6.65855997 |
| 6.56978697 | 6.73654941 | 6.7398832  | 7.29322148 | 7.12626669 | 6.62980146 | 7.25817498 |
| 12.3011801 | 12.0983411 | 11.7524271 | 12.1707091 | 10.8720561 | 10.3164411 | 11.12684   |
| 7.42111219 | 7.72937603 | 7.8959551  | 7.90868443 | 6.86642585 | 6.8043195  | 6.78099375 |
| 9.85661694 | 10.4348575 | 9.07074674 | 10.2701902 | 9.73202832 | 9.00306388 | 9.83648452 |
| 9.13621523 | 10.125314  | 9.19785458 | 9.72343945 | 9.49149719 | 9.39212634 | 9.31268264 |
| 7.95909605 | 7.84739754 | 7.59574159 | 7.53429821 | 6.41793047 | 6.12042079 | 6.64895    |
| 10.4039323 | 10.7448448 | 10.6693165 | 10.2338042 | 8.80483154 | 8.77252309 | 8.88476854 |
| 7.711956   | 7.74080414 | 7.89559467 | 7.94819141 | 6.83275333 | 6.74726923 | 6.71710334 |
| 13.101764  | 13.5945975 | 13.1967974 | 13.5722869 | 12.3242838 | 11.9793838 | 12.6739775 |
| 9.72224366 | 9.75866812 | 9.72918379 | 9.80621432 | 9.18346766 | 9.34483005 | 9.0073183  |
| 6.89417022 | 6.81725358 | 7.12082158 | 7.19001328 | 6.0886761  | 5.89679496 | 5.97904855 |
| 8.11233629 | 8.15260377 | 8.52994936 | 8.73911057 | 7.45537819 | 6.99858366 | 7.56003624 |
| 6.88451734 | 6.78472252 | 6.66698377 | 7.39554956 | 7.61774955 | 6.89024603 | 7.71936555 |
| 12.8150752 | 13.152524  | 12.4071987 | 12.9474118 | 12.4843094 | 11.2096197 | 12.4252353 |
| 7.319785   | 7.26691956 | 7.29030736 | 7.82499437 | 7.32250506 | 6.34945976 | 7.4050955  |
| 8.88330159 | 8.90116739 | 8.4043897  | 9.21123395 | 7.86062703 | 7.62085323 | 8.36790569 |
| 8.85415371 | 8.41671225 | 8.85596012 | 8.83974926 | 7.98021442 | 7.82051853 | 8.18387106 |

|            |            |            |            |            |            |            |
|------------|------------|------------|------------|------------|------------|------------|
| 7.79047231 | 8.10230854 | 7.85284408 | 8.31317555 | 7.3644525  | 6.87338259 | 7.60096028 |
| 7.28271038 | 6.67412305 | 7.35008613 | 7.06235381 | 6.64729868 | 6.37127639 | 6.51824179 |
| 7.11665378 | 6.98884485 | 6.88141868 | 7.05315914 | 6.49822613 | 6.11851318 | 6.44771605 |
| 7.65765072 | 8.00801564 | 7.90101711 | 7.8089809  | 7.54032413 | 6.89930858 | 7.47328769 |
| 10.6797334 | 11.1293957 | 10.729399  | 11.2785087 | 10.3089351 | 9.85948525 | 10.3329373 |
| 9.90839367 | 9.92740361 | 9.63613246 | 9.58895575 | 8.63072107 | 8.18183505 | 8.47241263 |
| 11.8852651 | 12.4563755 | 12.1997754 | 12.4617194 | 11.3799133 | 11.2136693 | 11.6028065 |
| 8.30056077 | 8.69247637 | 8.94890303 | 8.83255904 | 8.33632133 | 7.9066381  | 8.21775806 |
| 8.32989319 | 7.90347398 | 8.11160571 | 8.00093632 | 7.83446663 | 7.15844105 | 7.6742855  |
| 8.67982701 | 9.10278199 | 8.34270629 | 8.7377307  | 8.66060316 | 8.14219898 | 8.60639781 |
| 8.17886749 | 8.52879321 | 8.08909821 | 8.481024   | 8.49097679 | 7.50929363 | 8.24337871 |
| 11.6787885 | 12.1860975 | 11.9780998 | 12.3390076 | 10.7073643 | 10.6388323 | 10.8804919 |
| 6.78163511 | 6.69000356 | 7.1191009  | 7.03777974 | 6.22563008 | 6.1479471  | 6.04114834 |
| 13.8082654 | 13.7597873 | 13.7077139 | 14.1665813 | 12.8031945 | 12.5109815 | 13.3562346 |
| 7.35702761 | 7.62856219 | 7.27662693 | 7.61380861 | 7.0744744  | 7.08827731 | 6.99083917 |
| 9.73059411 | 10.1873471 | 9.86490159 | 10.2569576 | 9.01468139 | 8.96735712 | 9.46840452 |
| 9.10776501 | 9.31571362 | 9.19655787 | 9.6195005  | 8.99879998 | 8.67766362 | 9.01099657 |
| 6.47419087 | 6.50321753 | 6.6909911  | 6.79822034 | 6.80560459 | 5.90231698 | 6.70052295 |
| 9.705171   | 9.77063945 | 8.00722074 | 8.64398819 | 8.6378656  | 8.53705723 | 8.64482391 |
| 6.5265598  | 6.42984206 | 6.83942805 | 6.78409038 | 6.41472565 | 6.07148339 | 6.21413277 |
| 7.06286968 | 7.15308178 | 7.29906695 | 7.80289177 | 7.81846011 | 7.58428157 | 7.66791766 |
| 6.21807069 | 6.16771278 | 6.4931282  | 6.49687247 | 5.93407721 | 5.9464291  | 5.76728878 |
| 6.63434815 | 6.72695107 | 6.88682934 | 6.8802092  | 6.02403505 | 6.12359833 | 5.84042647 |
| 6.432148   | 6.49524553 | 6.80609201 | 7.54236021 | 7.35935688 | 6.46442192 | 7.05653801 |
| 6.46314309 | 6.81115888 | 6.47168692 | 6.77733423 | 6.94602548 | 6.22732656 | 6.59931229 |
| 6.2510883  | 6.26240666 | 6.48291345 | 6.4486514  | 5.7106855  | 5.65678894 | 5.5537024  |
| 7.3082389  | 6.90258977 | 7.03262875 | 6.93345343 | 6.43730299 | 6.05003451 | 6.32048179 |
| 8.23367815 | 8.0308034  | 7.78939018 | 8.31268332 | 7.68438396 | 7.29647393 | 7.57753835 |
| 6.63129581 | 6.43062249 | 6.77815337 | 6.63515435 | 6.45005517 | 6.33029235 | 6.52359677 |
| 7.67632595 | 7.66938399 | 7.2934836  | 7.76651566 | 7.49581746 | 7.10483774 | 7.47092644 |
| 6.50491224 | 6.40998317 | 6.55625328 | 6.30486839 | 5.91016444 | 5.75068716 | 5.68123448 |
| 6.85702925 | 6.49249736 | 6.55734943 | 6.72473348 | 6.18985934 | 6.12830041 | 5.97235537 |
| 7.27759335 | 7.18622817 | 7.33263454 | 7.14459503 | 6.79980744 | 6.3084437  | 6.69552063 |
| 6.46826692 | 6.07661125 | 6.63993337 | 6.52460095 | 5.78333171 | 5.76199102 | 5.85621934 |
| 8.03304025 | 7.74020171 | 7.90608787 | 7.89862073 | 7.71961265 | 6.83815257 | 7.63548742 |
| 7.06168981 | 7.11254898 | 6.89688455 | 7.82942212 | 6.70024133 | 6.28861566 | 6.9789415  |
| 8.11001813 | 7.94720209 | 7.44503306 | 8.20354622 | 7.4917994  | 7.25922634 | 7.56340832 |
| 6.87052378 | 6.5787401  | 6.68955916 | 7.01726832 | 6.75410048 | 6.42106791 | 6.67932104 |
| 6.51452297 | 6.3740151  | 6.55073278 | 6.54418026 | 6.04166112 | 5.70236942 | 5.69708071 |
| 9.0818011  | 8.393027   | 8.37962616 | 8.96295498 | 7.62156913 | 7.2443429  | 7.65474485 |
| 7.77430213 | 7.56900949 | 7.27751152 | 7.75493626 | 6.65362185 | 6.43506697 | 6.82315703 |
| 7.61115098 | 6.85294767 | 7.64874009 | 7.99603843 | 7.32452081 | 6.7746474  | 7.3400753  |
| 7.85542167 | 7.7852916  | 7.6139596  | 7.59189704 | 7.08337082 | 6.89536079 | 7.02934797 |
| 7.3734368  | 6.81156094 | 6.99453108 | 6.8201879  | 6.32394736 | 6.25105723 | 6.13095722 |
| 6.1839551  | 5.97021635 | 6.53890841 | 6.24002404 | 5.72716325 | 5.51332872 | 5.46588046 |
| 6.76484241 | 6.89348114 | 7.36913055 | 7.18343193 | 6.57429607 | 6.66236361 | 6.47243984 |
| 6.24261946 | 6.15770264 | 6.52246274 | 6.47565546 | 5.9503317  | 5.70236388 | 5.7243575  |
| 8.19979894 | 7.27210253 | 7.13072087 | 7.79516496 | 7.65830576 | 6.65429805 | 7.51057905 |

|            |            |            |            |            |            |            |
|------------|------------|------------|------------|------------|------------|------------|
| 6.52706502 | 6.35495211 | 6.71170964 | 6.59472037 | 6.32248397 | 6.24178643 | 6.20247551 |
| 7.26970925 | 6.83934742 | 7.01076418 | 7.58304289 | 6.77960906 | 6.48586279 | 7.00737044 |
| 7.15314463 | 7.04552488 | 7.06720523 | 7.32018679 | 6.58534281 | 6.32652207 | 6.39465321 |
| 6.70912656 | 6.74202778 | 6.74382057 | 6.98391022 | 6.38609632 | 6.09535904 | 6.45864858 |
| 7.60254447 | 7.30465067 | 7.47837487 | 7.5976429  | 6.54210123 | 6.55628486 | 6.51586239 |
| 7.93324922 | 7.94471148 | 7.67169745 | 7.96837189 | 6.99508874 | 6.6015493  | 7.1770577  |
| 9.11772387 | 9.50153011 | 8.43564609 | 9.3639225  | 8.40933195 | 7.96909983 | 8.52791991 |
| 8.09129362 | 8.08947061 | 7.95323089 | 8.23601515 | 7.59994185 | 7.30147882 | 7.51013356 |
| 6.26657349 | 6.21232478 | 6.5198155  | 6.46420003 | 6.00236048 | 5.75612822 | 5.71813555 |
| 7.6894718  | 7.82331819 | 7.52138687 | 8.17680047 | 6.60397982 | 7.27611882 | 6.36180292 |
| 7.05070738 | 6.98463264 | 6.72588973 | 7.20656606 | 6.44191832 | 5.96112483 | 6.46841714 |
| 7.45392659 | 7.31341185 | 7.31167113 | 7.61079454 | 6.9531884  | 6.26259101 | 6.93178823 |
| 8.50233975 | 8.61649885 | 8.47585338 | 8.91058038 | 8.68156909 | 8.16572255 | 8.48331921 |
| 6.77771559 | 6.44614091 | 6.6725894  | 6.90906622 | 6.38141213 | 6.52405176 | 6.23261663 |
| 7.35774992 | 7.12675815 | 7.38490287 | 7.63321685 | 7.04506067 | 6.6687758  | 6.86085357 |
| 9.05465587 | 8.00693529 | 7.99451015 | 7.7118459  | 7.39102185 | 6.89796643 | 7.10233059 |
| 7.18223841 | 6.51388642 | 6.83071421 | 6.72406085 | 6.24861737 | 5.86747249 | 5.97397099 |
| 6.76490343 | 7.01585323 | 6.71459584 | 7.26743467 | 6.92192422 | 6.4478848  | 6.90924147 |
| 6.28233249 | 6.40048362 | 6.55148372 | 6.72614866 | 6.50554561 | 6.04847031 | 6.28276356 |
| 6.21780283 | 5.99901841 | 6.4083559  | 6.41132285 | 5.63966225 | 5.61844835 | 5.39822209 |
| 6.20185848 | 6.24254687 | 6.60159342 | 6.44238488 | 5.56859825 | 5.79893469 | 5.4731206  |
| 8.0166824  | 7.86220402 | 7.43976939 | 7.55276745 | 6.62051559 | 6.2636078  | 6.53261214 |
| 6.41573653 | 6.15390584 | 6.53692541 | 6.55522319 | 5.74760653 | 5.38401733 | 5.52082388 |
| 6.49814538 | 6.68172333 | 6.51985512 | 6.80400321 | 6.68755625 | 6.11937568 | 6.38093806 |
| 6.32529358 | 6.26927314 | 6.36632134 | 6.5216375  | 5.87606061 | 5.62213003 | 5.57767565 |
| 7.12727937 | 6.72694154 | 6.35313412 | 6.41364621 | 5.94820111 | 5.62138905 | 5.6693307  |
| 8.82902119 | 8.17050647 | 7.73478277 | 8.40776572 | 7.00354939 | 6.50140045 | 6.89601143 |
| 7.80986972 | 7.03923273 | 7.36825762 | 7.42165588 | 7.17281451 | 7.56911965 | 6.94748382 |
| 6.46526175 | 6.2311096  | 6.65321626 | 6.65185679 | 6.09210382 | 5.87694147 | 5.84617335 |
| 7.42385462 | 7.32862557 | 7.62312282 | 7.34556137 | 7.41057431 | 6.89315103 | 7.31137687 |
| 7.00351229 | 7.53659226 | 7.33998625 | 7.59023897 | 7.34139784 | 6.40170367 | 6.97715626 |
| 7.33826395 | 6.8125547  | 7.06782369 | 7.31061006 | 6.34953991 | 6.16627598 | 6.4955308  |
| 9.86779101 | 9.32627555 | 9.19255765 | 9.47818656 | 7.86889785 | 7.83898579 | 8.03783903 |
| 7.24891523 | 6.72127011 | 7.24216041 | 7.25307406 | 6.71355698 | 6.23196744 | 6.46026011 |
| 6.85815137 | 7.04460177 | 7.07372706 | 7.12833052 | 7.0870618  | 6.61731685 | 6.96354117 |
| 7.46036825 | 7.17291949 | 6.91094248 | 7.04869829 | 6.56977375 | 6.2040098  | 6.50151367 |
| 6.93753861 | 6.66018848 | 7.30007063 | 7.12735883 | 6.76272087 | 6.22796937 | 6.56013165 |
| 9.45087575 | 9.99269622 | 8.87963869 | 9.86486832 | 8.42334874 | 8.14656104 | 8.92666515 |
| 8.53391954 | 8.03005572 | 7.49274248 | 7.84683301 | 6.74617301 | 6.57617987 | 6.63157928 |
| 8.62015273 | 7.3840144  | 7.21597266 | 7.28874429 | 6.64652847 | 6.11635519 | 6.60444722 |
| 6.43825525 | 6.34589167 | 6.52436039 | 6.62442102 | 5.72253597 | 5.71412598 | 5.59791578 |
| 8.73346179 | 8.31101713 | 7.04444112 | 7.39388293 | 6.53670337 | 6.59644547 | 6.46684113 |
| 12.9431853 | 13.2217311 | 12.7721746 | 12.9880498 | 12.2963097 | 11.616898  | 12.2362343 |

| P008_NS    | P009_NS    | C029_1_NS  | C029_2_NS  | C048_NS    | C099_NS    | C170_NS    |
|------------|------------|------------|------------|------------|------------|------------|
| 13.0187699 | 15.0056991 | 14.7826804 | 14.7851556 | 13.1802989 | 13.3851991 | 13.217156  |
| 7.39418485 | 9.05666643 | 9.01939057 | 9.07774797 | 7.51286211 | 8.0292563  | 7.78783597 |
| 7.24353199 | 8.03600378 | 8.18431055 | 8.33767497 | 7.26704508 | 7.45592144 | 7.54403865 |
| 7.02581617 | 8.78943811 | 7.66276663 | 7.66829644 | 7.60405501 | 7.23863498 | 7.46639954 |
| 6.23296768 | 9.57070446 | 7.65154758 | 7.67404887 | 7.50544478 | 7.35143664 | 7.05084231 |
| 6.80477638 | 8.54617293 | 8.73561255 | 8.83619051 | 7.68153782 | 7.46895877 | 7.20501122 |
| 6.6569811  | 8.95282918 | 7.96885914 | 7.85041815 | 7.06401625 | 6.95578589 | 6.70764626 |
| 6.02375103 | 6.77817572 | 7.00949386 | 6.74801837 | 6.16353577 | 5.88576543 | 6.74150744 |
| 7.28680169 | 9.69479002 | 8.82574048 | 8.83941451 | 7.40386588 | 7.55696044 | 7.89156561 |
| 6.30396445 | 7.36231909 | 7.32661375 | 7.24585975 | 6.13045875 | 6.44476214 | 6.933287   |
| 7.05979653 | 9.12679325 | 8.8566101  | 8.83337115 | 7.01808999 | 7.50163977 | 6.58520624 |
| 7.45712556 | 9.71011333 | 9.52558482 | 9.37727301 | 8.56418608 | 8.40295917 | 8.4011082  |
| 7.69397614 | 8.30784333 | 7.65954429 | 7.73506856 | 6.72796945 | 6.98591364 | 6.95394033 |
| 7.26172637 | 8.95745498 | 8.81174556 | 8.81303978 | 7.24097064 | 7.34329322 | 7.36730641 |
| 6.81367475 | 7.99862202 | 7.70942161 | 7.71577534 | 7.3044718  | 6.67646771 | 7.42944859 |
| 7.23897693 | 7.84512055 | 8.09326596 | 8.02044164 | 6.93398919 | 6.93715604 | 7.27204839 |
| 7.06543768 | 8.91140907 | 9.41879502 | 9.44517339 | 7.16933779 | 8.10271534 | 7.87644205 |
| 7.74187479 | 9.30712953 | 9.73403638 | 9.68519679 | 7.41632295 | 7.75619268 | 7.56254315 |
| 5.84800317 | 6.42855129 | 6.41994855 | 6.52317536 | 5.41306157 | 5.41480564 | 5.64853303 |
| 6.37969962 | 7.77135807 | 7.46256935 | 7.39347541 | 6.4379754  | 6.32689665 | 6.42369985 |
| 8.4728553  | 10.1059452 | 9.81217923 | 9.69243539 | 7.3754044  | 7.92933476 | 8.77164265 |
| 5.71222956 | 7.09112433 | 7.40485715 | 7.23550114 | 5.9278282  | 5.65103447 | 6.20888514 |
| 8.08941605 | 9.76858548 | 9.58229086 | 9.58407783 | 7.80848223 | 7.94828371 | 8.14083642 |
| 11.6737693 | 13.4926656 | 13.1916396 | 13.1321543 | 12.7312541 | 12.0587474 | 12.1970732 |
| 11.9440096 | 13.824569  | 13.6596648 | 13.684341  | 10.2778418 | 11.6069294 | 11.2123882 |
| 5.74521528 | 7.04303494 | 7.17477891 | 7.03356726 | 6.01322663 | 5.97645827 | 6.46555743 |
| 14.0324427 | 15.3392254 | 15.3220401 | 15.3591185 | 13.3972053 | 13.8145394 | 13.9309212 |
| 8.12221663 | 10.1041466 | 9.43047346 | 9.3714896  | 8.64630417 | 7.99154339 | 8.20433589 |
| 6.80241943 | 8.91570135 | 8.37651613 | 8.29485413 | 7.53498059 | 7.38075542 | 7.38866571 |
| 9.35196903 | 11.8577859 | 11.3839516 | 11.3715997 | 9.86993724 | 9.45250319 | 9.83099397 |
| 14.0818554 | 15.1313779 | 15.1605183 | 15.0553807 | 13.2612484 | 13.640037  | 13.7755784 |
| 12.1037501 | 14.3829293 | 13.9488463 | 13.9160409 | 12.9313113 | 12.6462237 | 13.0180381 |
| 5.89433784 | 7.09872588 | 6.97338971 | 6.84420862 | 5.83990342 | 6.07035713 | 6.17062334 |
| 8.18028912 | 9.78902609 | 9.68932153 | 9.624087   | 7.68833984 | 8.31650013 | 7.93231871 |
| 5.46347468 | 6.14848329 | 6.19018381 | 6.40348963 | 5.09069383 | 5.13268911 | 5.45333682 |
| 11.8134826 | 14.532849  | 13.759962  | 13.7571441 | 13.0304308 | 12.3983677 | 13.013977  |
| 9.46102344 | 11.4014758 | 11.2084734 | 11.1552167 | 8.83083936 | 9.2458329  | 9.16402143 |
| 8.44450681 | 9.69283498 | 10.7817728 | 10.6659878 | 9.4383517  | 9.16828977 | 9.17142077 |
| 6.00816662 | 7.06651763 | 7.69456892 | 7.62711506 | 6.36820768 | 6.12549613 | 6.17909638 |
| 7.39687788 | 8.3698224  | 8.18006678 | 8.13831942 | 6.60742042 | 6.93304971 | 6.85246584 |
| 8.97348443 | 12.2148418 | 11.0055158 | 10.9863427 | 9.73157768 | 9.45213744 | 9.6510429  |
| 8.69833969 | 8.87087142 | 9.90051484 | 9.74558895 | 8.30993194 | 8.2113369  | 8.50177828 |
| 6.55046207 | 8.16537937 | 7.63234529 | 7.52769672 | 6.68774519 | 6.68739388 | 6.37548729 |
| 7.43438971 | 9.22585958 | 9.22325939 | 9.30084215 | 7.99352889 | 7.64339445 | 7.47981259 |
| 6.14559187 | 7.33477473 | 7.18517575 | 7.10534389 | 6.6442774  | 6.64728572 | 6.46969765 |
| 9.1104452  | 10.8777297 | 10.6604185 | 10.734774  | 9.4689665  | 9.44886668 | 8.9722044  |
| 7.28630362 | 8.5057163  | 8.59716762 | 8.34960634 | 7.41869258 | 7.1935914  | 7.63384385 |

|            |            |            |            |            |            |            |
|------------|------------|------------|------------|------------|------------|------------|
| 7.10464278 | 8.52211108 | 8.85736305 | 8.89780039 | 6.66477294 | 7.34040293 | 7.30076986 |
| 7.39746329 | 7.88528882 | 8.52550006 | 8.59139107 | 6.90308167 | 6.75828985 | 7.17593871 |
| 9.46368416 | 9.85721669 | 10.4907165 | 10.5143847 | 9.90367085 | 10.030543  | 9.70688155 |
| 10.4515089 | 12.2430314 | 12.0825483 | 11.9722468 | 10.9649855 | 11.0289041 | 11.0681495 |
| 7.36773973 | 8.42966324 | 8.999774   | 9.20156795 | 6.48580355 | 7.54528886 | 7.27342917 |
| 6.01543802 | 7.90774154 | 7.95267137 | 7.99199908 | 6.31447358 | 6.80752237 | 6.85740256 |
| 14.5086571 | 15.1441978 | 15.7175118 | 15.6206062 | 13.7025634 | 14.1886723 | 14.3368831 |
| 7.09372601 | 8.64702951 | 8.87014491 | 8.90463703 | 7.02290928 | 7.06271321 | 7.05150479 |
| 6.43368842 | 6.99575698 | 7.43219277 | 7.4469096  | 5.63508512 | 6.05206283 | 6.34594328 |
| 8.67285031 | 10.8754553 | 10.9432027 | 10.8832413 | 9.4249139  | 9.37062137 | 9.60583617 |
| 5.76398567 | 7.25112258 | 6.80662695 | 6.78606048 | 6.34425684 | 5.67276759 | 6.11369279 |
| 7.79738463 | 9.84260271 | 9.40168443 | 9.35809335 | 7.92405058 | 7.89676469 | 8.00112948 |
| 9.36668394 | 11.7263996 | 11.0932532 | 10.9695391 | 9.69582648 | 9.87718243 | 10.4107524 |
| 6.57184106 | 9.37115653 | 9.12995037 | 9.15036851 | 8.58834548 | 7.64445695 | 8.26412635 |
| 7.44294515 | 10.1790208 | 9.06218082 | 9.10178242 | 7.73566568 | 7.45762876 | 7.42425869 |
| 8.57848969 | 9.72683581 | 10.7302281 | 10.703792  | 9.81143362 | 9.40821615 | 10.1091673 |
| 6.86182389 | 7.20004328 | 8.27986126 | 8.26809702 | 8.37587352 | 6.92473176 | 6.61050917 |
| 6.05859682 | 7.2446854  | 7.6247728  | 7.55030968 | 6.57499898 | 6.01860591 | 6.79522537 |
| 7.35304182 | 9.40788508 | 8.73334417 | 8.73130783 | 7.16759176 | 7.63215332 | 8.00538314 |
| 8.81279052 | 11.0667888 | 10.6274181 | 10.540439  | 9.89028176 | 9.77737796 | 9.75453063 |
| 6.92048387 | 7.39220406 | 7.65630472 | 7.70225374 | 6.75345746 | 6.74188625 | 7.40625859 |
| 11.390737  | 13.4115984 | 12.9852149 | 12.9399718 | 11.9280438 | 11.7726107 | 11.9655643 |
| 8.1310971  | 10.0790314 | 9.69055119 | 9.66546188 | 8.24881706 | 8.20978135 | 8.83790793 |
| 7.97020255 | 9.29978704 | 9.73145328 | 9.58127253 | 8.74843976 | 8.20523219 | 8.10705174 |
| 8.52970931 | 11.4115073 | 10.3470688 | 10.3066496 | 9.10922211 | 9.11209202 | 9.22870616 |
| 9.33605616 | 9.68972198 | 9.81224406 | 9.84793225 | 8.32822926 | 8.75219898 | 9.21676356 |
| 7.27972943 | 9.57924729 | 9.14117628 | 9.0996805  | 7.18910402 | 7.5260422  | 7.53500548 |
| 8.09562383 | 9.47726245 | 10.0982098 | 10.0199493 | 7.90108953 | 8.21615217 | 8.88440835 |
| 9.13206756 | 11.1697797 | 10.633661  | 10.5653097 | 9.42998433 | 9.02013407 | 9.31320118 |
| 6.16983463 | 8.16251973 | 6.79926349 | 6.79565787 | 5.67360193 | 7.88213435 | 6.37670244 |
| 7.90345771 | 8.79199082 | 9.9716542  | 9.91535493 | 8.17078836 | 7.70964837 | 8.12639887 |
| 8.27015841 | 10.5302805 | 10.4442705 | 10.3431357 | 8.53238866 | 8.67929606 | 9.16809493 |
| 8.95515062 | 11.1405001 | 11.0766773 | 10.9938965 | 9.87810749 | 9.5709027  | 9.53516902 |
| 6.96740035 | 6.82634001 | 7.4639992  | 7.27257567 | 6.20202389 | 6.35413017 | 6.7490059  |
| 7.90680523 | 9.55133375 | 10.2504038 | 10.2359364 | 8.96097875 | 8.25325232 | 8.92575321 |
| 6.08984832 | 6.83418912 | 6.75131241 | 6.74810025 | 5.49479992 | 5.82525393 | 6.0846681  |
| 6.97669471 | 8.51141348 | 8.3363865  | 8.26250645 | 7.45111713 | 7.05662905 | 8.03593617 |
| 7.70529992 | 8.90221772 | 9.29828348 | 9.26459601 | 6.68918313 | 7.68064083 | 7.94195198 |
| 12.6875028 | 14.9594528 | 14.9144192 | 14.8354114 | 13.4161642 | 13.2723717 | 13.7506452 |
| 9.38440085 | 11.6134078 | 11.651319  | 11.58507   | 10.4309062 | 9.86459444 | 10.2505827 |
| 5.53790421 | 9.27468891 | 8.60604352 | 8.67101307 | 5.28620953 | 7.77604607 | 5.77207726 |
| 8.51290595 | 10.6960147 | 10.1746786 | 10.1477989 | 8.94037997 | 8.82016779 | 9.29732671 |
| 6.63426595 | 8.19619096 | 8.25828241 | 8.11740882 | 7.18462248 | 6.77586703 | 6.88779331 |
| 8.93479482 | 10.1693877 | 10.3088202 | 10.2344917 | 9.14758323 | 9.18883261 | 9.50128089 |
| 8.09825532 | 9.76320971 | 9.63922203 | 9.68002857 | 8.12731549 | 8.23006993 | 8.95877889 |
| 6.28602892 | 7.80326385 | 7.21351254 | 7.12440052 | 7.04709337 | 6.72014574 | 6.61718342 |
| 9.15049393 | 10.4633987 | 10.7931595 | 10.7076292 | 8.82830058 | 8.58490577 | 9.47174857 |
| 5.96000054 | 8.13412389 | 7.57481299 | 7.44771308 | 7.01830813 | 6.59542056 | 6.3594711  |

|            |            |            |            |            |            |            |
|------------|------------|------------|------------|------------|------------|------------|
| 7.73445967 | 9.30799015 | 9.12506367 | 9.08525016 | 7.81522637 | 7.90075392 | 8.13675175 |
| 8.75458424 | 11.2295351 | 9.95075753 | 10.0719383 | 8.80682154 | 8.80502638 | 9.42724055 |
| 7.80361969 | 8.72799021 | 9.50980449 | 9.37080029 | 7.98066    | 7.79580201 | 7.34123237 |
| 8.18324433 | 10.7339457 | 10.3754848 | 10.4071583 | 9.13574391 | 8.97209466 | 9.43944217 |
| 11.8645375 | 13.6892424 | 13.4194112 | 13.3230773 | 12.4984708 | 12.2546829 | 12.6817018 |
| 6.75538702 | 7.31660737 | 7.23378359 | 7.06792047 | 5.57293271 | 5.94803567 | 6.30319022 |
| 8.96784298 | 9.89703224 | 9.82488191 | 9.69344218 | 9.32237459 | 8.95955254 | 9.17715988 |
| 6.2400376  | 7.98275976 | 7.73852399 | 7.82470931 | 6.02456592 | 6.52673772 | 6.71871095 |
| 6.96007493 | 10.6140923 | 9.56866736 | 9.46146881 | 9.78589935 | 8.15532727 | 9.67776456 |
| 10.743398  | 13.5205978 | 13.2580756 | 13.3564245 | 10.1863966 | 11.1886989 | 10.8299875 |
| 7.44570602 | 9.79356381 | 9.68318132 | 9.60855146 | 8.43523812 | 8.52201493 | 8.50207238 |
| 10.698439  | 11.7544291 | 12.6080868 | 12.525023  | 10.558612  | 10.291691  | 11.4422412 |
| 10.6145148 | 12.9204104 | 12.9387166 | 12.8119857 | 12.3862702 | 11.17642   | 11.6488375 |
| 6.31554214 | 7.04410227 | 8.65050753 | 8.49541736 | 6.70520798 | 6.45146764 | 7.36493481 |
| 8.05848481 | 8.11646873 | 8.14332198 | 7.99342246 | 7.31452433 | 7.3797691  | 7.82606539 |
| 9.19851208 | 11.2252936 | 11.2192042 | 11.0659337 | 8.74871682 | 9.39557633 | 9.31214418 |
| 5.89036984 | 7.27477322 | 7.84496431 | 7.76900206 | 5.65600977 | 6.28192039 | 6.38565864 |
| 12.3745187 | 14.3131863 | 14.5385667 | 14.3970816 | 13.5701498 | 13.1015595 | 13.6417233 |
| 5.91597591 | 6.29405275 | 6.80472992 | 6.5703301  | 5.25364065 | 5.52261135 | 6.65095551 |
| 12.110575  | 11.7189318 | 11.385554  | 11.2585378 | 9.67078547 | 10.6370867 | 11.1760653 |
| 10.6149012 | 12.0945452 | 12.6570884 | 12.6350925 | 10.1130272 | 10.6727506 | 10.6373884 |
| 10.9722575 | 12.8375345 | 12.729972  | 12.5661701 | 12.108904  | 11.4233928 | 11.5572162 |
| 6.65219965 | 8.17624996 | 8.27858606 | 8.13596318 | 7.27186823 | 6.77691725 | 6.92142681 |
| 7.48488733 | 10.1953648 | 9.70769423 | 9.67675382 | 8.30284269 | 8.13293614 | 8.4315373  |
| 6.98011787 | 7.7648444  | 8.14712401 | 8.17614671 | 6.65713263 | 6.70262015 | 6.95552089 |
| 9.96185568 | 12.5611801 | 12.2377812 | 12.1245595 | 11.0988881 | 11.0313221 | 11.1085395 |
| 10.6359403 | 12.7491536 | 12.7163074 | 12.6334026 | 11.0557915 | 10.6907462 | 11.1325813 |
| 7.61760631 | 10.4926684 | 9.67272499 | 9.60734937 | 8.40969896 | 8.25091043 | 7.61306969 |
| 7.37880031 | 9.45922094 | 9.34189393 | 9.23969614 | 9.21647742 | 7.63590309 | 7.73818416 |
| 10.9848442 | 12.9873091 | 12.4429401 | 12.3255986 | 11.3883171 | 11.3427608 | 11.558172  |
| 6.64824108 | 7.62764842 | 7.34901313 | 7.25289625 | 6.36882125 | 6.29613855 | 6.3791697  |
| 7.68914957 | 8.92810172 | 8.18827382 | 8.27182996 | 7.7558116  | 7.76797982 | 8.33826395 |
| 10.1608698 | 13.5122306 | 12.2916697 | 12.3185815 | 11.778602  | 11.1054371 | 11.6460501 |
| 6.94095837 | 8.63355763 | 9.14201896 | 9.06000684 | 7.67279021 | 7.48478423 | 7.9823348  |
| 7.1956232  | 9.28721093 | 9.33787296 | 9.25646583 | 7.8243058  | 7.71342845 | 7.60789249 |
| 12.2303616 | 14.2468749 | 14.1516397 | 13.9975103 | 11.6525855 | 12.2646493 | 12.0133331 |
| 7.89128247 | 9.77366392 | 9.60730128 | 9.56104808 | 7.51645174 | 7.35882084 | 7.53153196 |
| 7.323189   | 10.1166961 | 9.36089404 | 9.3237049  | 8.48993905 | 7.69067969 | 8.48238487 |
| 11.4844191 | 13.3818606 | 13.2054496 | 13.1348322 | 11.785076  | 11.9306353 | 12.1766354 |
| 6.86450313 | 8.47848206 | 8.36474619 | 8.39750479 | 7.4050589  | 7.04101404 | 7.31086358 |
| 6.92651068 | 8.76353773 | 8.56200081 | 8.55086912 | 7.03427295 | 7.32938107 | 7.438213   |
| 6.84885826 | 8.70815309 | 8.02320877 | 8.10152087 | 6.50115982 | 6.71513422 | 7.06980634 |
| 10.1741405 | 11.2878959 | 12.0837256 | 12.0929371 | 10.4110491 | 10.2222395 | 11.7547414 |
| 14.1309598 | 15.2451352 | 15.3660227 | 15.2745431 | 13.3096426 | 13.5697275 | 13.6953447 |
| 8.34444106 | 9.91767849 | 9.90108154 | 9.95175752 | 7.73134619 | 8.28658225 | 8.02230067 |
| 9.34436937 | 12.0993814 | 11.909391  | 11.6753277 | 11.0607736 | 10.2406423 | 9.97355531 |
| 6.61536156 | 8.20067109 | 7.61733596 | 7.64773471 | 6.90277666 | 6.52003874 | 7.13073014 |
| 6.33487375 | 7.19237863 | 7.99040751 | 7.8181322  | 6.76649048 | 6.7843862  | 7.02138645 |

|            |            |            |            |            |            |            |
|------------|------------|------------|------------|------------|------------|------------|
| 6.41086428 | 7.46396488 | 7.56495123 | 7.6015747  | 6.43280311 | 6.44821082 | 6.65462601 |
| 9.41283677 | 10.7887901 | 10.8379409 | 10.7599639 | 8.44261346 | 8.89884894 | 8.99800223 |
| 11.4785629 | 12.6231584 | 13.0002009 | 12.9151132 | 11.4298199 | 10.8978629 | 12.3431191 |
| 13.7163919 | 15.0256185 | 15.31878   | 15.2321811 | 13.498312  | 13.6991614 | 13.8976309 |
| 7.91718528 | 9.98046236 | 10.4143311 | 10.4229278 | 9.59195687 | 9.00776427 | 9.53598314 |
| 7.23641225 | 9.91233146 | 9.39124638 | 9.42542511 | 7.7889845  | 7.89294468 | 8.08163043 |
| 6.42096824 | 6.75623472 | 6.70132587 | 6.59670069 | 6.08078343 | 6.45255969 | 6.11030206 |
| 11.6797787 | 13.3818836 | 13.9434416 | 13.9314061 | 10.9576179 | 11.7552949 | 11.666643  |
| 9.69189947 | 11.7398743 | 11.3966781 | 11.3804703 | 10.2999338 | 10.1389514 | 10.4825357 |
| 6.24763648 | 8.18628958 | 7.80405033 | 7.68797119 | 6.32534899 | 6.2970296  | 6.30168184 |
| 10.9552474 | 12.3678133 | 13.2688597 | 13.1466349 | 10.5041635 | 11.21753   | 10.9903692 |
| 7.89946146 | 9.48303155 | 9.35782798 | 9.13207065 | 8.0774636  | 7.8626324  | 8.53013397 |
| 8.98905639 | 10.623278  | 10.6238495 | 10.5516487 | 8.32867224 | 8.84428239 | 8.65427692 |
| 5.71239851 | 6.9687693  | 7.16883756 | 7.17234149 | 5.69810483 | 6.31572979 | 6.19527692 |
| 14.5014454 | 15.4725779 | 15.5442285 | 15.4384394 | 13.613824  | 14.0644127 | 14.0842802 |
| 6.25661896 | 8.94419374 | 8.24018551 | 8.12493241 | 7.42298897 | 7.48032653 | 6.8957643  |
| 7.19752437 | 8.60655253 | 8.61366535 | 8.64396222 | 7.2535289  | 7.58318735 | 7.26969429 |
| 7.04256445 | 9.24467946 | 8.61696671 | 8.66860457 | 7.33137829 | 6.97388331 | 7.73238928 |
| 9.43857273 | 10.9880058 | 11.0714952 | 11.1563562 | 9.22981164 | 9.64112493 | 9.75510656 |
| 5.69379526 | 6.87423384 | 6.64016278 | 6.4948671  | 6.36383496 | 6.15629953 | 6.24690569 |
| 10.6093764 | 13.0235785 | 12.8967294 | 12.9682919 | 11.9076531 | 11.4394933 | 11.7459932 |
| 8.32693502 | 9.82435975 | 9.97195734 | 10.0233801 | 9.2110862  | 8.53847841 | 8.9047773  |
| 7.61446398 | 9.13542995 | 9.04792195 | 9.05771859 | 7.95642437 | 7.6400287  | 8.03440392 |
| 6.83574221 | 7.54899602 | 8.13253058 | 8.19852608 | 6.01891164 | 6.69271871 | 6.63262506 |
| 7.65020377 | 8.53065525 | 8.73092079 | 8.6961907  | 5.68424901 | 6.93354903 | 6.63875896 |
| 7.47392893 | 8.48731872 | 8.00221588 | 8.06433159 | 7.16328638 | 7.44580118 | 7.71545481 |
| 14.2714601 | 15.6198749 | 15.5022945 | 15.5688524 | 14.2650656 | 14.0925045 | 14.2885157 |
| 5.75347832 | 6.87037952 | 6.82557195 | 6.78839469 | 7.16550801 | 5.51588178 | 9.41201044 |
| 6.7010458  | 7.68374136 | 7.88578116 | 7.90025338 | 6.43752538 | 6.96104099 | 6.86252702 |
| 5.77168067 | 7.59256094 | 7.12800567 | 7.24497551 | 5.40992175 | 6.14668556 | 5.96031547 |
| 12.6240879 | 14.5427018 | 14.5122078 | 14.4822256 | 12.5291863 | 12.9141332 | 12.63037   |
| 7.91939133 | 10.2075354 | 9.96736894 | 10.04563   | 8.99136708 | 8.78803834 | 9.07496937 |
| 7.29076812 | 10.1304637 | 9.44597763 | 9.45209933 | 7.60082056 | 8.08888097 | 8.29502639 |
| 5.76684928 | 7.59780229 | 7.58040255 | 7.57189899 | 5.52409377 | 6.21281113 | 5.73372365 |
| 6.12100442 | 7.14707668 | 7.01540502 | 6.98814386 | 5.71887011 | 5.91745825 | 6.15359378 |
| 10.9376644 | 13.1497955 | 13.2076403 | 13.2599586 | 11.7791858 | 11.375197  | 11.6870699 |
| 7.6045384  | 10.456376  | 9.41086597 | 9.43615913 | 8.19444169 | 8.33091867 | 8.33740559 |
| 9.50374883 | 11.3546373 | 11.0599244 | 11.0640549 | 9.87071364 | 9.74212094 | 9.95686791 |
| 9.65731899 | 11.2502582 | 11.4617547 | 11.4964569 | 9.99691125 | 9.99788513 | 9.63705573 |
| 5.89408144 | 6.69136945 | 6.95800395 | 7.04080368 | 6.49457418 | 5.94466662 | 6.01503274 |
| 6.19355986 | 7.52362154 | 7.77308513 | 7.69062941 | 6.18894425 | 6.24337566 | 6.3409601  |
| 8.05695846 | 8.67672685 | 9.53507354 | 9.5861406  | 7.98644109 | 7.44460247 | 8.05750605 |
| 8.8854981  | 11.7482134 | 11.1946122 | 11.1291284 | 10.2060034 | 9.42436766 | 11.3184377 |
| 7.1753719  | 8.1377863  | 8.51337586 | 8.5032235  | 7.01604162 | 6.65317756 | 7.20333724 |
| 8.92448148 | 10.8217804 | 10.6153436 | 10.5161156 | 9.0278521  | 9.21296152 | 9.63096582 |
| 8.35457117 | 10.4682106 | 10.101436  | 10.0057579 | 8.89705433 | 8.91175509 | 9.23374669 |
| 7.86969624 | 8.54304458 | 8.82884004 | 8.80904459 | 6.83963464 | 7.56895554 | 7.61962869 |
| 5.76445922 | 6.66350545 | 6.58572332 | 6.74078997 | 5.50965911 | 5.6392339  | 5.81668341 |



|            |            |            |            |            |            |            |
|------------|------------|------------|------------|------------|------------|------------|
| 7.20930421 | 8.44228211 | 8.37692717 | 8.34063659 | 6.31690817 | 6.80377337 | 6.9982587  |
| 11.9374102 | 14.2493557 | 13.8879079 | 13.763423  | 12.7585634 | 12.5649835 | 12.5643906 |
| 10.4195484 | 12.5537891 | 12.11269   | 12.1815247 | 10.0010042 | 10.5364454 | 10.0686668 |
| 13.9455591 | 15.1509559 | 15.1217889 | 15.0705441 | 13.4726337 | 13.7321982 | 13.9759142 |
| 11.704993  | 13.9748698 | 13.7087175 | 13.6206826 | 12.4891608 | 12.3747442 | 12.2608058 |
| 10.5417926 | 11.513625  | 11.8206309 | 11.7073872 | 9.57154485 | 10.1496074 | 9.88790311 |
| 11.9336667 | 13.7979725 | 13.6862762 | 13.5550408 | 12.4357057 | 12.2613439 | 12.4238219 |
| 6.91139678 | 8.04701209 | 8.26196467 | 8.18364531 | 7.19601583 | 7.18524514 | 7.75577088 |
| 6.9019445  | 8.23281615 | 8.09488685 | 8.16652013 | 6.34642544 | 6.79010605 | 6.96209898 |
| 7.05056264 | 10.6032239 | 10.4292488 | 10.4700823 | 9.75758069 | 8.82261449 | 9.60509314 |
| 8.68709674 | 10.3572826 | 10.6297792 | 10.641248  | 8.46451512 | 8.87882893 | 8.77409387 |
| 12.4806176 | 13.0414177 | 14.2780545 | 14.3189544 | 13.1133425 | 12.9865594 | 13.2445329 |
| 9.18838337 | 10.9865681 | 11.4620856 | 11.4349956 | 9.21910655 | 9.78941969 | 9.64970096 |
| 6.01457512 | 7.68279519 | 7.74918093 | 7.81241158 | 6.09147537 | 6.32345582 | 6.362136   |
| 8.6741015  | 8.79341343 | 10.2986285 | 10.1621698 | 8.26159663 | 8.24564635 | 7.78291764 |
| 6.49519835 | 8.14229345 | 8.34050753 | 8.372637   | 7.64688051 | 7.17954688 | 7.19837923 |
| 11.8759252 | 14.7628071 | 14.441497  | 14.3924147 | 13.4841117 | 13.3213052 | 13.5853499 |
| 5.81940506 | 6.737826   | 6.87487933 | 6.92033499 | 5.46471727 | 5.89099672 | 6.23447354 |
| 7.89587212 | 9.29576985 | 9.31741126 | 9.25383047 | 8.10192999 | 8.22053698 | 8.75026582 |
| 8.30083986 | 10.5297556 | 10.4584804 | 10.3926094 | 9.19208022 | 8.87619921 | 9.08369924 |
| 6.66818296 | 6.99543703 | 7.14072549 | 7.40112015 | 5.77049449 | 6.12549179 | 6.35203124 |
| 6.07931218 | 6.67985163 | 9.3494303  | 9.32403222 | 5.79708848 | 5.79266642 | 6.13033106 |
| 7.73628083 | 10.050635  | 9.83513773 | 9.63459145 | 8.5207216  | 7.6148254  | 7.98025785 |
| 6.53768884 | 8.6940371  | 7.67722844 | 7.59205632 | 7.61867181 | 7.37592911 | 7.21105212 |
| 6.85563222 | 8.06442968 | 8.59300598 | 8.53354933 | 7.02246769 | 6.92580721 | 7.49248534 |
| 10.3664643 | 12.3555584 | 11.8288458 | 11.7450436 | 11.6966942 | 11.0947467 | 11.2573566 |
| 9.99855094 | 11.7596556 | 12.0585313 | 11.9976671 | 10.0027602 | 10.3690695 | 10.1098881 |
| 10.1672676 | 11.994882  | 12.6687944 | 12.589528  | 9.59487918 | 10.3363704 | 10.3180072 |
| 8.19753911 | 10.5074359 | 9.88257779 | 9.98973083 | 8.91023287 | 8.62453339 | 8.89487474 |
| 8.40138387 | 10.7811269 | 9.93491333 | 9.80258503 | 7.61738004 | 8.22038945 | 8.28798889 |
| 11.073525  | 13.1837259 | 12.9278689 | 12.8379109 | 11.8375231 | 11.6031766 | 12.2581523 |
| 6.0802076  | 6.97912448 | 7.68213292 | 7.7604066  | 5.61752271 | 6.16746291 | 5.94635096 |
| 8.40212568 | 10.9861755 | 10.8913121 | 10.9194757 | 10.1420317 | 9.76382136 | 9.85782801 |
| 8.01245079 | 10.3622189 | 9.84784255 | 9.83424934 | 9.05047939 | 8.59092345 | 8.90422034 |
| 6.70962563 | 8.79130943 | 8.80114831 | 8.846141   | 6.76847548 | 7.45490051 | 7.01836155 |
| 6.17768264 | 7.19460027 | 7.44661603 | 7.30731467 | 6.72326366 | 6.54361203 | 6.59366331 |
| 8.9975984  | 9.85123932 | 10.7649089 | 10.7250467 | 9.33084765 | 9.2449125  | 9.18913071 |
| 10.2291865 | 12.6779486 | 12.3783344 | 12.2786797 | 11.1355964 | 10.94361   | 10.9430452 |
| 14.313496  | 15.3581841 | 15.3878164 | 15.3907151 | 14.1037705 | 14.3379389 | 14.6476411 |
| 10.3663364 | 13.467985  | 12.5142118 | 12.4261311 | 11.676442  | 11.3801304 | 11.630507  |
| 6.28527385 | 7.53619126 | 7.80261717 | 7.78618205 | 6.13013808 | 6.41245519 | 6.68385363 |
| 9.52577272 | 11.5819971 | 11.3956835 | 11.199749  | 9.65076007 | 9.73849089 | 9.53834784 |
| 7.34529967 | 8.22891054 | 8.28147571 | 8.10937101 | 6.83201781 | 7.03392841 | 7.52454877 |
| 13.0799612 | 14.944734  | 14.9144627 | 14.8755862 | 14.1235605 | 13.2930491 | 13.6645106 |
| 9.2954558  | 10.3693291 | 10.5042241 | 10.5477236 | 10.2086563 | 9.72404584 | 9.7418657  |
| 9.91005624 | 11.312103  | 11.7627603 | 11.7440223 | 9.67334106 | 9.25720184 | 9.76749855 |
| 6.28838533 | 7.23220025 | 7.67915986 | 7.5421613  | 6.45399884 | 6.69160954 | 6.66200464 |
| 9.9059978  | 11.9627337 | 11.628657  | 11.5408081 | 10.3206652 | 10.1928032 | 10.4440044 |

|            |            |            |            |            |            |            |
|------------|------------|------------|------------|------------|------------|------------|
| 6.62549903 | 7.88025268 | 8.45202786 | 8.30516434 | 7.08213201 | 6.89335008 | 6.61229411 |
| 14.5303527 | 15.6376033 | 15.5908396 | 15.3759086 | 14.2187176 | 14.2539575 | 14.7709777 |
| 8.36241203 | 12.1735347 | 11.8507147 | 11.7068456 | 11.2031761 | 11.2596521 | 11.02048   |
| 11.3375221 | 13.1300789 | 12.9721764 | 13.0891668 | 10.9822321 | 11.3857238 | 11.2211346 |
| 8.79010409 | 9.90150803 | 9.84487568 | 9.78966911 | 9.71111801 | 9.35602537 | 9.03185336 |
| 8.22500735 | 10.9428539 | 10.0118338 | 10.1752402 | 8.67122083 | 8.32913571 | 8.74666312 |
| 7.32002158 | 8.57576877 | 8.60390521 | 8.54914778 | 6.70591572 | 7.38057795 | 7.28124942 |
| 12.4163183 | 11.7761003 | 12.6601562 | 12.6001057 | 10.7260964 | 11.5505559 | 11.4996172 |
| 5.84863471 | 7.98434611 | 6.41528967 | 6.52346332 | 6.77653963 | 5.91445306 | 6.53923792 |
| 6.4574697  | 7.70599656 | 8.19780545 | 8.18154637 | 6.30555964 | 6.58573669 | 6.71869178 |
| 6.55005366 | 6.46818985 | 7.50527565 | 7.52700307 | 5.46653511 | 5.67949164 | 6.29223677 |
| 7.34205688 | 8.28977223 | 8.61963016 | 8.52764746 | 6.34634158 | 6.96105489 | 6.65553788 |
| 12.4837898 | 13.8046988 | 14.2186419 | 14.1659708 | 12.7012462 | 12.2315974 | 12.9219227 |
| 8.96305125 | 10.4113616 | 9.78664504 | 9.65379827 | 8.70950605 | 8.42148126 | 9.95291753 |
| 7.9274728  | 10.0445799 | 9.39018164 | 9.44067257 | 8.11199216 | 7.96416987 | 8.7775864  |
| 9.93733086 | 11.3922171 | 12.0142838 | 11.8987083 | 9.36012084 | 9.83216833 | 9.90425076 |
| 10.3931502 | 12.643968  | 12.6731436 | 12.6606248 | 11.8549241 | 11.2932245 | 11.0291899 |
| 5.96140339 | 7.92142086 | 7.70456353 | 7.59622405 | 7.04788515 | 6.8323508  | 7.18353515 |
| 9.09924944 | 11.8550713 | 11.2820563 | 11.1871071 | 9.83475972 | 9.66516481 | 9.95280443 |
| 6.27589877 | 7.22216892 | 7.5945911  | 7.37163378 | 5.81456298 | 6.29901968 | 6.41756969 |
| 14.3974079 | 15.3185622 | 15.4052834 | 15.398245  | 13.5287789 | 13.8962482 | 13.9724351 |
| 8.73631804 | 10.5046363 | 10.0782242 | 10.0162191 | 7.97876136 | 8.59904287 | 8.27735715 |
| 5.99759388 | 7.91061695 | 7.15378913 | 7.02565341 | 6.3652985  | 5.89802063 | 6.32428714 |
| 6.96864145 | 8.47484444 | 8.4983901  | 8.57142312 | 7.1192576  | 7.07572729 | 7.26510116 |
| 12.778018  | 14.4632338 | 14.3585372 | 14.2285128 | 11.8818221 | 12.552201  | 12.3430816 |
| 9.5015721  | 9.87438033 | 10.4949896 | 10.5144044 | 8.96337442 | 9.26287167 | 8.59335489 |
| 5.95753183 | 6.88234103 | 6.87303924 | 7.02341394 | 5.76091551 | 5.94772693 | 6.05604545 |
| 5.7910149  | 8.28369309 | 7.77743879 | 7.67094087 | 5.33080648 | 6.47511424 | 5.80276424 |
| 7.58987881 | 10.2328166 | 9.41719071 | 9.51349588 | 8.02281442 | 8.14458993 | 8.369733   |
| 9.18581527 | 10.6877072 | 10.2879559 | 10.2166816 | 8.66321438 | 8.83985286 | 9.41045093 |
| 8.87190924 | 9.95366306 | 10.409026  | 10.2485586 | 8.60804852 | 9.08166425 | 8.42858085 |
| 5.89308136 | 6.60460838 | 7.10805394 | 6.95303354 | 5.98832817 | 6.00033539 | 6.20211285 |
| 8.82637561 | 9.82907718 | 10.8964588 | 10.8666129 | 8.89772145 | 8.96981934 | 9.21055812 |
| 6.72520536 | 8.6517847  | 8.91437078 | 8.99983036 | 7.67385813 | 6.88189706 | 7.74917422 |
| 7.78152561 | 10.0699975 | 9.38607394 | 9.34073472 | 8.21352712 | 8.04249332 | 8.35472543 |
| 6.94328491 | 8.25041355 | 8.38228595 | 8.41484672 | 6.58461441 | 6.87769272 | 6.88574029 |
| 6.28900778 | 8.93450471 | 7.97822252 | 8.21643643 | 6.52454501 | 6.66274812 | 7.07089268 |
| 7.11681906 | 8.53223045 | 8.19705349 | 8.16175419 | 6.79116289 | 6.65085358 | 6.89672232 |
| 9.40464984 | 10.7920134 | 11.4219191 | 11.4570735 | 10.0786459 | 10.0278383 | 9.94349532 |
| 10.1858517 | 12.4870557 | 12.1829821 | 12.0129178 | 10.5433915 | 10.4220543 | 10.7707919 |
| 6.56596892 | 7.35408008 | 7.88382606 | 7.80122722 | 5.75780307 | 6.31563941 | 6.30055958 |
| 6.12401706 | 7.22898315 | 7.58561382 | 7.39809979 | 5.76803475 | 5.97442928 | 6.24838569 |
| 6.8715332  | 9.08276725 | 8.33880367 | 8.39363972 | 7.46203759 | 7.21911139 | 7.49684499 |
| 6.6480023  | 8.09980277 | 8.05863849 | 8.04196627 | 5.97577599 | 6.50454333 | 6.65548779 |
| 5.5879224  | 6.63354368 | 6.90313953 | 6.91310243 | 5.57374867 | 5.79550463 | 5.81070684 |
| 11.8569939 | 13.9977881 | 13.9812123 | 14.0186166 | 12.2989598 | 12.4292605 | 12.227742  |
| 8.36939407 | 11.8708344 | 10.5089842 | 10.5034332 | 10.0942849 | 8.86168279 | 9.58723934 |
| 8.91568641 | 11.1158955 | 10.4259491 | 10.3792051 | 9.21300893 | 8.84069485 | 9.38046669 |

|            |            |            |            |            |            |            |
|------------|------------|------------|------------|------------|------------|------------|
| 8.40041369 | 10.4527694 | 10.5140157 | 10.3610599 | 8.96942739 | 9.04774477 | 9.21252435 |
| 11.2442401 | 13.0093299 | 12.8084828 | 12.7493149 | 10.7876169 | 11.2073322 | 10.8894553 |
| 6.03243723 | 7.76701646 | 7.5174387  | 7.63632953 | 6.65066118 | 6.52182968 | 6.97608749 |
| 8.51391981 | 10.3885835 | 10.1996858 | 10.0422517 | 9.77866428 | 9.21404246 | 9.65421641 |
| 7.29391577 | 9.22411699 | 9.37428247 | 9.39128205 | 8.54360724 | 7.66888286 | 8.88434302 |
| 8.83587356 | 6.76753828 | 6.87320416 | 7.02540316 | 5.65588959 | 5.90885589 | 6.1143083  |
| 7.11673798 | 8.52602498 | 7.80628345 | 7.70674258 | 6.58830958 | 6.89303936 | 7.01334724 |
| 9.68031135 | 10.3625093 | 11.6392299 | 11.4910003 | 10.3104526 | 9.83080641 | 10.363861  |
| 8.81110588 | 10.7047112 | 10.5009086 | 10.5095355 | 9.20645105 | 9.03477558 | 9.21488079 |
| 6.78223294 | 7.20737458 | 7.95188965 | 8.06640784 | 6.59656116 | 6.60611572 | 6.65524448 |
| 6.4789896  | 7.91601319 | 7.88278426 | 7.99507234 | 6.79588121 | 6.69575863 | 7.15111297 |
| 5.69165113 | 7.32387352 | 7.37285026 | 7.40221992 | 5.59861205 | 5.84544037 | 6.04864293 |
| 9.81252711 | 12.3697814 | 11.6223305 | 11.533558  | 10.811015  | 10.454874  | 10.7977231 |
| 8.0652287  | 9.56677349 | 9.97123314 | 10.0086667 | 7.62248749 | 8.23651797 | 8.16513613 |
| 9.64887129 | 12.001932  | 11.5098863 | 11.5217648 | 8.43288719 | 9.547069   | 9.57249503 |
| 5.49520843 | 8.21369042 | 7.73068682 | 7.77920981 | 5.2090006  | 6.51193083 | 5.63411374 |
| 6.48155195 | 6.84099313 | 6.94879005 | 7.09732741 | 5.60921125 | 5.93456132 | 5.92458498 |
| 10.61051   | 12.6260955 | 12.1199206 | 12.0270428 | 11.1598808 | 10.9692642 | 12.0588718 |
| 8.42897104 | 9.94725733 | 10.4239584 | 10.3236279 | 9.67201581 | 9.0174838  | 9.11476575 |
| 11.6341113 | 13.5342263 | 13.3271526 | 13.1481362 | 12.4162832 | 11.956142  | 12.480985  |
| 6.26210537 | 6.77007844 | 7.0625427  | 7.24260536 | 6.49430728 | 5.74564313 | 7.33871321 |
| 5.70013783 | 6.64639886 | 6.69325137 | 6.71343601 | 6.07306399 | 5.60298148 | 5.89264384 |
| 13.9880615 | 15.1287173 | 15.4308325 | 15.3586897 | 13.7778676 | 14.1036443 | 14.1551313 |
| 14.0780657 | 15.3822397 | 15.1744194 | 15.1162863 | 14.3394555 | 14.0908154 | 14.3350693 |
| 9.81379546 | 11.2596032 | 11.308934  | 11.1693006 | 8.91436689 | 9.25753682 | 9.23990088 |
| 6.48096255 | 7.56187522 | 7.77585781 | 7.80881041 | 6.1105946  | 6.5552416  | 6.22994221 |
| 7.0660655  | 9.35704521 | 8.85583775 | 8.88393265 | 7.36421171 | 7.5723008  | 7.89947838 |
| 6.71260954 | 8.56699015 | 7.97845307 | 7.91947655 | 7.04103595 | 6.53142638 | 6.96388907 |
| 7.89576975 | 10.2549967 | 8.72688161 | 8.73377055 | 8.14010172 | 8.24029429 | 8.63915654 |
| 6.26950168 | 7.84646072 | 7.26354996 | 7.2308649  | 5.89307966 | 6.27454384 | 6.58721285 |
| 11.9298102 | 14.1207271 | 13.8060098 | 13.7266397 | 12.7939453 | 12.2665386 | 12.8924872 |
| 9.43329416 | 11.9799249 | 11.6509916 | 11.5489587 | 10.9997076 | 10.7525429 | 10.4966291 |
| 9.7649031  | 10.2139487 | 11.5320612 | 11.3956755 | 9.91226977 | 9.54421933 | 8.81045499 |
| 7.84006537 | 9.45060382 | 9.75296965 | 9.59150645 | 8.48454581 | 8.07504588 | 8.76311209 |
| 7.76046249 | 9.73098021 | 9.31852338 | 9.26129315 | 7.44620163 | 7.77024234 | 8.22605762 |
| 7.03240835 | 8.63161435 | 8.30430203 | 8.18830844 | 7.0840313  | 7.17843579 | 7.15330172 |
| 7.29865648 | 8.07175087 | 9.02329001 | 8.98478386 | 7.5319327  | 7.15151385 | 7.59889293 |
| 8.5159919  | 10.4379403 | 10.1415209 | 10.1754547 | 9.55123645 | 9.28796419 | 9.15707555 |
| 7.09360665 | 8.50148413 | 8.09985589 | 8.059816   | 6.74650492 | 7.22393412 | 7.14203045 |
| 7.3308649  | 8.75757702 | 8.24057288 | 8.43913232 | 8.02520048 | 7.35691937 | 7.6305853  |
| 9.60578284 | 11.5062565 | 10.9376291 | 10.9482241 | 9.43722566 | 9.62168231 | 9.97827573 |
| 11.160849  | 14.0099598 | 13.5935429 | 13.5521443 | 12.0842766 | 11.9959424 | 12.4252899 |
| 11.4779252 | 13.3210402 | 12.8750682 | 12.8246637 | 12.1083082 | 11.6965946 | 12.1076153 |
| 9.26198323 | 11.3818165 | 11.0148211 | 10.8947587 | 9.41075597 | 8.86657143 | 10.1625751 |
| 6.03455579 | 7.05904372 | 7.18325624 | 7.13714076 | 5.59385122 | 5.89173316 | 6.45223168 |
| 7.304407   | 8.05979221 | 8.62298597 | 8.49211156 | 7.45743998 | 6.63254073 | 8.24092582 |
| 11.4383818 | 11.0724227 | 11.5500132 | 11.4803752 | 9.27190021 | 10.1614406 | 10.5161718 |
| 7.37734243 | 8.95541249 | 9.04656964 | 9.04842421 | 8.3165137  | 7.70578373 | 8.60221597 |

|            |            |            |            |            |            |            |
|------------|------------|------------|------------|------------|------------|------------|
| 7.64139141 | 10.2517025 | 9.55005047 | 9.40602702 | 8.40739524 | 8.1218531  | 8.50730864 |
| 6.65809292 | 6.83827487 | 7.05090759 | 6.89666541 | 5.73476624 | 5.96730074 | 5.97226415 |
| 8.63509375 | 8.78281905 | 9.33890393 | 9.37852485 | 7.06167901 | 7.96069994 | 7.7889271  |
| 8.65223658 | 10.8505018 | 10.668026  | 10.5974623 | 8.87494509 | 9.29315917 | 9.03390969 |
| 7.19204125 | 9.64499547 | 9.13646032 | 9.08433937 | 9.22100123 | 8.22435193 | 9.07824289 |
| 11.3171576 | 12.8659323 | 13.0737158 | 12.9445443 | 11.8867982 | 11.6554963 | 11.9666259 |
| 5.68731269 | 8.71164185 | 8.95188149 | 8.91621179 | 5.45041222 | 7.20945434 | 5.78946609 |
| 7.40202716 | 9.349139   | 8.55475844 | 8.66362926 | 8.13845357 | 7.52708989 | 8.06124697 |
| 11.6523745 | 13.2704957 | 13.785103  | 13.9326466 | 11.2879501 | 11.9988802 | 11.7785449 |
| 12.5095135 | 14.2498209 | 14.2127973 | 14.1402706 | 12.6335879 | 12.6093124 | 12.7942317 |
| 8.06207367 | 9.69568522 | 8.44093435 | 8.29568308 | 6.29369805 | 7.3051908  | 7.75202666 |
| 6.20090606 | 7.12622539 | 7.63394626 | 7.6453133  | 6.97920224 | 6.49447418 | 6.87130525 |
| 6.66837446 | 9.05638763 | 8.7917392  | 8.72458138 | 7.7599208  | 7.36664394 | 7.5633023  |
| 5.36336209 | 7.7531024  | 7.60539655 | 7.47417561 | 5.03855031 | 6.10931417 | 5.55000116 |
| 10.1816269 | 12.0607284 | 11.8015576 | 11.8534207 | 9.75090676 | 10.2008704 | 9.9693635  |
| 10.1991693 | 12.0188004 | 11.6289677 | 11.5304595 | 10.2640919 | 10.7066281 | 10.8959554 |
| 9.12310848 | 12.0632431 | 11.216998  | 11.2097391 | 10.2181672 | 9.95162874 | 10.4513811 |
| 9.40321105 | 10.7893519 | 10.3354417 | 10.425817  | 8.82018886 | 8.99941379 | 10.1706324 |
| 8.94992357 | 9.91604604 | 10.3756346 | 10.2549896 | 7.91693637 | 8.36077511 | 8.41394267 |
| 12.4602777 | 14.4560823 | 14.4881885 | 14.414818  | 12.1337571 | 12.6744357 | 12.5253233 |
| 6.66137908 | 9.02666784 | 7.76081241 | 7.681769   | 7.47155654 | 6.94822471 | 7.30565047 |
| 6.29975312 | 7.93736794 | 8.1788187  | 8.28331991 | 6.69015586 | 6.3941303  | 6.59394904 |
| 6.93067466 | 8.13190582 | 7.96591412 | 7.9093657  | 6.81030942 | 6.80032659 | 7.01051916 |
| 5.96195688 | 7.76319045 | 7.87472259 | 7.77108863 | 6.00793012 | 6.64358133 | 6.59824103 |
| 6.40214453 | 6.95647838 | 7.40929928 | 7.45859937 | 5.95208308 | 6.2573043  | 6.5151911  |
| 7.49331749 | 9.27126715 | 9.27429545 | 9.21578924 | 8.39376454 | 7.80285236 | 8.33413426 |
| 8.53539825 | 11.1674332 | 10.4466346 | 10.3532549 | 9.29139566 | 8.87353147 | 9.03980134 |
| 6.90750481 | 8.61434103 | 9.13980483 | 9.08157052 | 6.7655122  | 7.2903175  | 7.00905487 |
| 12.1625443 | 14.1381998 | 14.0114972 | 13.8752934 | 12.7147369 | 12.4613779 | 12.6117752 |
| 8.16937838 | 10.1613473 | 9.89771267 | 9.8752098  | 8.75722364 | 8.32845952 | 8.29172096 |
| 6.98342347 | 6.05730513 | 8.25052582 | 8.02106714 | 5.10630853 | 7.41224126 | 7.83637611 |
| 7.07855753 | 9.24991436 | 8.57190582 | 8.5985822  | 6.87337767 | 6.39912939 | 6.99845955 |
| 8.32609372 | 10.0689099 | 10.3856467 | 10.0901932 | 8.96542847 | 8.53430094 | 9.14565912 |
| 6.95030977 | 8.22919086 | 7.60093724 | 7.75594376 | 7.66348197 | 7.13122008 | 8.25821786 |
| 8.17690416 | 10.1398097 | 10.1686746 | 10.0482989 | 8.10637449 | 8.22578729 | 8.36183677 |
| 8.68994313 | 10.3196439 | 10.177995  | 10.1348858 | 9.57885986 | 8.7076818  | 9.25664981 |
| 5.89193823 | 7.10718778 | 7.15309496 | 7.17272152 | 5.8798954  | 5.89067213 | 6.52722488 |
| 6.54945417 | 8.90835239 | 8.31264067 | 8.192854   | 7.89196046 | 7.372024   | 7.21452895 |
| 9.99399413 | 11.6754843 | 12.1038526 | 12.0160227 | 9.34678629 | 10.0096369 | 9.87620013 |
| 7.18368599 | 8.43426417 | 9.96694086 | 9.85788461 | 9.30369948 | 8.18636932 | 9.89099365 |
| 7.70562202 | 9.67221882 | 9.69154638 | 9.6773428  | 8.31710957 | 8.42776329 | 9.17875198 |
| 7.14220306 | 7.96694778 | 7.81694652 | 7.75694722 | 6.17445815 | 6.44921568 | 6.4579946  |
| 9.30560602 | 11.4901815 | 10.7201861 | 10.5893188 | 9.13396623 | 9.35973814 | 9.86565425 |
| 9.37946241 | 11.6621249 | 10.6615448 | 10.6469493 | 10.1486177 | 9.98382018 | 10.1676991 |
| 8.00550273 | 9.30116281 | 9.77713546 | 9.7782738  | 8.65194825 | 8.71863014 | 8.78653331 |
| 6.95083464 | 8.70506487 | 8.11921298 | 8.05975004 | 6.4041463  | 6.62338742 | 6.98793134 |
| 6.46455964 | 6.54601067 | 7.24979232 | 7.17595966 | 5.9325195  | 5.97388652 | 6.00474002 |
| 7.9630764  | 9.56275567 | 9.08716048 | 9.06896445 | 7.34085954 | 7.44771969 | 8.17246101 |

|            |            |            |            |            |            |            |
|------------|------------|------------|------------|------------|------------|------------|
| 8.62914749 | 9.43094152 | 9.35175464 | 9.27916227 | 7.93871216 | 8.48284748 | 8.23922713 |
| 9.76119301 | 11.7360805 | 12.0604214 | 12.1194739 | 11.5732013 | 10.8351914 | 11.2165003 |
| 6.59190721 | 7.04991932 | 6.28765587 | 6.2662712  | 5.97708412 | 5.73238155 | 6.33550291 |
| 9.73242999 | 11.3006952 | 11.3956241 | 11.3329932 | 10.5010062 | 9.56017193 | 10.2192545 |
| 7.81986358 | 9.72156696 | 9.00166124 | 9.12651606 | 8.72870012 | 8.05372337 | 8.82014162 |
| 6.62659523 | 9.13607601 | 8.89850798 | 8.90608276 | 8.20906925 | 7.49454682 | 7.56246606 |
| 8.19437717 | 10.1333131 | 9.39497044 | 9.37373564 | 7.55496713 | 7.8389253  | 8.17336633 |
| 5.79144684 | 6.95918475 | 7.22232544 | 7.29920619 | 6.02681555 | 6.08884377 | 6.34436764 |
| 8.95232862 | 10.4340089 | 10.3563981 | 10.2123201 | 9.14591075 | 8.86943407 | 9.54563792 |
| 5.91761459 | 6.83814122 | 7.1106994  | 7.03174806 | 5.91697935 | 5.97524887 | 9.20118908 |
| 8.30989966 | 10.490168  | 9.97325538 | 10.0038749 | 8.24967714 | 8.65540693 | 8.4943348  |
| 6.98689213 | 7.70881904 | 8.55060251 | 8.49172205 | 6.53757392 | 6.60289881 | 7.01002451 |
| 6.49064634 | 7.62910668 | 8.11107358 | 8.11271108 | 5.98813795 | 5.84055085 | 7.06507895 |
| 6.30462256 | 8.4397856  | 8.49669602 | 8.34227161 | 8.23601276 | 7.33884422 | 7.65821791 |
| 10.6104085 | 12.4481042 | 14.0567342 | 13.9113424 | 12.2304867 | 11.1181384 | 11.5766733 |
| 7.202548   | 9.02703404 | 9.45623304 | 9.34525709 | 7.99374851 | 7.71747697 | 7.40970405 |
| 10.7992355 | 13.6504033 | 13.3472075 | 13.306741  | 11.3126051 | 11.5027269 | 11.6050118 |
| 5.6742872  | 7.3294313  | 7.47761176 | 7.41968299 | 5.25358922 | 6.11563653 | 5.47671543 |
| 8.20767034 | 10.2676997 | 9.8447577  | 9.70967094 | 9.09006689 | 8.49461802 | 9.30529433 |
| 12.6143751 | 14.8698497 | 14.6877382 | 14.6947643 | 13.8730076 | 13.0981009 | 13.4884327 |
| 7.76140097 | 9.07736933 | 9.39216821 | 9.34232695 | 7.5016342  | 7.89297321 | 8.93363489 |
| 12.2259497 | 13.8347713 | 14.1611579 | 14.1754521 | 11.5561923 | 12.3236971 | 12.082187  |
| 8.46969635 | 10.9426553 | 10.6007009 | 10.5703956 | 10.2855594 | 9.16701313 | 9.60438069 |
| 10.9773329 | 12.8740884 | 13.330627  | 13.2730406 | 12.2653528 | 11.8244512 | 11.2648021 |
| 8.41857874 | 10.873551  | 11.2223379 | 11.1362542 | 9.94312225 | 9.18041817 | 10.045174  |
| 8.87415144 | 10.5858414 | 10.4408007 | 10.4583984 | 8.89255769 | 8.74989691 | 9.0520194  |
| 6.71623095 | 8.95283354 | 9.28832626 | 9.32259541 | 7.09809632 | 6.98888574 | 8.34048082 |
| 9.78092914 | 11.2722402 | 11.0166036 | 10.9870032 | 10.1025309 | 9.65287419 | 10.020123  |
| 5.99291342 | 6.46158471 | 6.08635791 | 6.01427517 | 5.47557554 | 5.76860119 | 5.80252748 |
| 11.6681635 | 12.9806191 | 14.0897724 | 13.9742963 | 12.8531994 | 12.8060378 | 11.761884  |
| 6.38027525 | 7.65649208 | 8.18551376 | 8.18263917 | 6.68657896 | 6.69475904 | 6.80715267 |
| 6.88361715 | 7.47695353 | 7.12742074 | 7.12481922 | 5.96062847 | 6.56742726 | 6.28136554 |
| 10.8802937 | 13.0866743 | 12.7736544 | 12.7065811 | 11.7975825 | 11.5476339 | 11.4096938 |
| 6.94711908 | 8.98451046 | 8.41604211 | 8.45194299 | 7.08856354 | 7.26031082 | 7.53494791 |
| 9.22764217 | 11.2803793 | 11.2087824 | 11.202073  | 10.1968541 | 9.56412433 | 9.69317713 |
| 9.46021444 | 10.2743479 | 10.5533    | 10.4756149 | 9.23466322 | 8.91834389 | 9.12283084 |
| 6.56935194 | 7.75844843 | 7.78244264 | 7.73974889 | 7.37666546 | 6.92879667 | 6.99532509 |
| 9.05359903 | 11.1388017 | 10.7279689 | 10.7803142 | 9.76817506 | 9.67756339 | 9.18292391 |
| 6.81683263 | 8.27659297 | 8.31927967 | 8.23554087 | 7.05227024 | 7.02652566 | 7.08070243 |
| 12.3391031 | 14.2908216 | 14.3178747 | 14.2589119 | 12.2624989 | 12.8339106 | 12.5341168 |
| 9.34477037 | 10.3484958 | 11.0573887 | 10.9812269 | 8.84765373 | 8.86226757 | 8.90279867 |
| 5.85081067 | 7.86425054 | 7.36098751 | 7.40942064 | 5.84440976 | 6.04621536 | 6.10012994 |
| 7.11499578 | 10.2485028 | 9.57521683 | 9.63310203 | 8.10510027 | 7.56555605 | 7.9470273  |
| 7.04974837 | 8.08283562 | 8.18134908 | 8.15216364 | 6.45930817 | 7.16994905 | 6.76680185 |
| 11.4450526 | 14.4180002 | 13.9237267 | 13.8374634 | 12.8052392 | 12.283543  | 12.9578811 |
| 6.42657054 | 8.15943846 | 8.93438794 | 8.89027249 | 7.25942974 | 6.81273309 | 7.78357648 |
| 8.23383295 | 9.74326755 | 10.1609404 | 10.1871751 | 7.80183573 | 8.20413729 | 8.19605962 |
| 8.09009918 | 9.79255395 | 9.14210323 | 9.03217194 | 8.11015598 | 8.00461543 | 8.14660431 |

|            |            |            |            |            |            |            |
|------------|------------|------------|------------|------------|------------|------------|
| 7.27108293 | 8.58632453 | 8.76474125 | 8.83337526 | 6.70136192 | 7.34587624 | 7.31703448 |
| 6.33427221 | 8.14534731 | 7.55925242 | 7.55275362 | 6.19469186 | 6.63997836 | 7.04949355 |
| 6.36928919 | 7.11728881 | 7.65586126 | 7.37747084 | 6.01177851 | 6.08581043 | 6.20376281 |
| 7.20050141 | 7.72715808 | 8.08070776 | 8.08892071 | 7.45148231 | 7.23388039 | 7.37735718 |
| 10.1372742 | 11.5382767 | 12.1490005 | 12.1627891 | 9.6644256  | 10.4344291 | 10.166718  |
| 8.28286001 | 10.1834605 | 9.66726769 | 9.73305855 | 9.28101336 | 8.82612992 | 9.00757844 |
| 11.5227095 | 13.346342  | 13.1073569 | 13.1609441 | 10.9331359 | 11.4991498 | 11.1644218 |
| 8.16580293 | 9.65819345 | 9.42671783 | 9.53671211 | 7.8948111  | 8.09461718 | 8.4007215  |
| 7.33839143 | 8.04249989 | 8.02971514 | 8.10426222 | 7.05803287 | 6.82618237 | 6.56161559 |
| 8.42457531 | 9.25495183 | 9.60748345 | 9.69425271 | 8.551927   | 8.06047276 | 9.51818457 |
| 7.47237567 | 9.36999313 | 9.28140314 | 9.36089996 | 7.36866796 | 7.82215397 | 8.28468578 |
| 11.0992314 | 13.1900602 | 12.9610539 | 12.8756277 | 10.742653  | 11.3205524 | 10.8952011 |
| 6.17975188 | 6.73291903 | 7.17055104 | 7.32337097 | 6.53795839 | 5.97601965 | 6.6330625  |
| 13.1795527 | 14.9591602 | 15.0397219 | 14.9600169 | 12.825537  | 13.3876781 | 13.2451939 |
| 7.29712629 | 8.0529826  | 8.13612011 | 8.04728863 | 7.06400439 | 6.88495074 | 7.59621809 |
| 9.34996874 | 11.0682986 | 10.7786587 | 10.7936984 | 8.70109676 | 9.276452   | 9.13741361 |
| 8.80817007 | 11.0687481 | 10.2647182 | 10.2257762 | 8.94180002 | 8.87466942 | 8.79758631 |
| 6.15101268 | 7.25922823 | 7.18316491 | 7.13531836 | 6.0151552  | 6.50073068 | 6.65707688 |
| 8.9447715  | 10.6852709 | 10.7013351 | 10.5498896 | 7.81554341 | 9.07011075 | 8.79573643 |
| 6.01337963 | 6.53357114 | 6.83683431 | 6.99299837 | 5.73441536 | 6.05310786 | 6.042594   |
| 7.52030516 | 8.82541518 | 9.04866805 | 8.95643134 | 7.00825493 | 7.61959935 | 7.5027093  |
| 5.76774165 | 6.68638287 | 6.62876106 | 6.67713751 | 5.369545   | 5.5826704  | 5.95075277 |
| 6.17049455 | 6.92919093 | 7.14885684 | 7.13430207 | 5.78541166 | 5.77344071 | 6.01151487 |
| 6.4937911  | 7.34950152 | 7.32147538 | 7.31989697 | 6.00307665 | 6.58381961 | 6.28696984 |
| 6.25493828 | 7.74749952 | 7.78127118 | 7.78911235 | 6.10811083 | 6.59143932 | 6.47881928 |
| 5.63051643 | 6.15206333 | 6.32800561 | 6.34009293 | 5.34452282 | 5.52007583 | 5.7070424  |
| 6.07817729 | 7.37396657 | 7.73209211 | 7.60200249 | 6.19045466 | 6.23643388 | 6.59654535 |
| 7.53134481 | 9.22351354 | 9.03864716 | 8.93591405 | 7.31254447 | 7.96045495 | 7.48889414 |
| 6.47812308 | 7.49774967 | 7.53333596 | 7.54014199 | 5.73490088 | 6.17009271 | 6.08849654 |
| 7.382324   | 8.88054105 | 8.72020971 | 8.71954284 | 6.82722836 | 6.97643811 | 6.9291495  |
| 5.95094869 | 6.51954112 | 6.75105795 | 6.67147738 | 5.27737296 | 5.61270753 | 5.65229116 |
| 6.04538181 | 6.83368834 | 6.86207195 | 6.76762037 | 5.69535052 | 5.94082098 | 6.08648721 |
| 6.36208865 | 8.1042014  | 8.01930105 | 7.97130155 | 6.49458298 | 6.53200254 | 7.17504449 |
| 5.81209437 | 6.67898035 | 6.67261769 | 6.57831608 | 5.4234306  | 5.57155426 | 5.81241351 |
| 6.94332594 | 9.39161415 | 8.98794043 | 9.14419885 | 7.60613719 | 8.00394061 | 7.60574099 |
| 6.59757572 | 8.70643662 | 8.31052372 | 8.24339013 | 5.72737757 | 6.44675315 | 6.22533606 |
| 7.26433469 | 8.50655593 | 8.74839045 | 8.77990579 | 6.83280649 | 7.39258704 | 7.19376386 |
| 6.55811745 | 8.05399645 | 8.29002207 | 8.14351485 | 5.96651053 | 6.57293543 | 6.50415907 |
| 5.77695724 | 6.47754555 | 6.79047231 | 6.61735976 | 5.59261371 | 5.70974444 | 6.09365207 |
| 7.51370154 | 9.83131548 | 8.76761408 | 8.93990033 | 8.41248178 | 7.88622089 | 8.01563026 |
| 6.89912245 | 8.15979214 | 8.74889021 | 8.70851559 | 7.02010767 | 6.75244488 | 6.70179716 |
| 6.67037583 | 8.49903305 | 8.27243337 | 8.31498241 | 7.00852611 | 7.28033743 | 7.15868744 |
| 6.91775038 | 7.58815544 | 8.44200212 | 8.44550532 | 6.89083334 | 6.89121016 | 6.96068777 |
| 6.35547796 | 7.88597696 | 7.60257714 | 7.59619199 | 6.00246288 | 6.35046648 | 6.27939255 |
| 5.58508693 | 6.4239882  | 6.13768344 | 6.27266431 | 5.28884652 | 5.33452323 | 5.7071871  |
| 6.86511586 | 7.88378697 | 8.00824933 | 7.74979838 | 6.19940596 | 6.56857925 | 6.51777472 |
| 5.61801718 | 6.25671688 | 6.61071733 | 6.49928368 | 5.41348678 | 5.83089873 | 5.42953429 |
| 6.67117871 | 8.55278897 | 8.25581322 | 8.30943361 | 7.44913379 | 7.53546591 | 7.53140798 |

|            |            |            |            |            |            |            |
|------------|------------|------------|------------|------------|------------|------------|
| 6.08797088 | 6.99414409 | 7.51971566 | 7.52831892 | 5.37421843 | 5.87840386 | 6.03011688 |
| 6.44790991 | 7.83104053 | 8.17412624 | 7.96473247 | 6.10512175 | 6.43659995 | 6.45867368 |
| 6.47646626 | 7.21914335 | 7.29978223 | 7.22217085 | 6.7375367  | 6.16283923 | 6.20400706 |
| 6.34148324 | 7.02477843 | 7.32895222 | 7.22784117 | 5.50432451 | 5.93078393 | 6.13044207 |
| 6.61875255 | 8.14578188 | 7.64120208 | 7.54944816 | 6.47626681 | 7.04637974 | 7.39449442 |
| 6.84036504 | 7.88380285 | 8.65804971 | 8.52742383 | 7.66562869 | 7.29322608 | 7.09127669 |
| 8.29153219 | 9.474004   | 10.2136948 | 10.1387927 | 7.70677849 | 8.10197305 | 7.99015673 |
| 7.38512987 | 9.27444502 | 8.61520992 | 8.60764804 | 7.94320461 | 7.73492161 | 7.85053254 |
| 5.80051375 | 6.54966301 | 6.56053338 | 6.63049022 | 5.48068262 | 5.71093396 | 5.97103835 |
| 7.17920747 | 8.65173699 | 9.79681528 | 9.76272452 | 5.72726156 | 6.7000124  | 6.98227034 |
| 6.20223708 | 7.24580747 | 7.77477191 | 7.70328208 | 5.75813605 | 6.21170825 | 6.3560783  |
| 6.34580405 | 8.58560256 | 8.22408708 | 8.17213844 | 6.57457582 | 7.37614884 | 7.38198672 |
| 8.18853049 | 9.62604501 | 9.93703154 | 9.84352618 | 8.14018048 | 8.52550084 | 8.79311783 |
| 6.41473123 | 7.48912222 | 7.66123939 | 7.63591978 | 5.75330689 | 6.14715546 | 6.14511555 |
| 6.51099356 | 8.57313742 | 8.32055688 | 8.31430136 | 6.45266429 | 7.18934226 | 7.26606033 |
| 7.05036021 | 7.72704641 | 8.61372354 | 8.57739257 | 7.32201826 | 7.11889021 | 6.75777401 |
| 5.94978657 | 7.50279521 | 7.24532832 | 7.31191267 | 6.43124903 | 6.27260683 | 6.3342504  |
| 6.55962977 | 8.12763999 | 8.43001591 | 8.26421316 | 6.50651705 | 7.22641508 | 6.80349958 |
| 5.99084234 | 7.28838164 | 7.0641025  | 6.93534423 | 5.72556803 | 6.04927114 | 6.03872786 |
| 5.57016932 | 6.10727735 | 6.40104043 | 6.17634811 | 5.21283194 | 5.4409884  | 5.44714904 |
| 5.63818711 | 6.36274322 | 6.49269346 | 6.43317179 | 5.41402354 | 5.50447103 | 5.67881448 |
| 6.29465806 | 7.9771637  | 7.86829414 | 7.9402901  | 6.95768365 | 6.82215015 | 6.88299146 |
| 5.58455969 | 6.64685964 | 6.41531874 | 6.33054549 | 5.29137259 | 5.41854282 | 5.60011956 |
| 6.15681322 | 7.79247928 | 7.5531631  | 7.52956408 | 5.67801527 | 6.5674662  | 6.47243594 |
| 5.6808183  | 6.49634186 | 6.57620285 | 6.44533903 | 5.68203752 | 5.64965512 | 5.67947813 |
| 5.49806477 | 7.41297963 | 6.97270529 | 6.70106244 | 5.29643171 | 5.58512329 | 6.46994994 |
| 6.78862307 | 8.9608476  | 8.30501838 | 8.16229565 | 6.78658852 | 6.91874042 | 7.595488   |
| 7.67340731 | 8.23498312 | 8.32213862 | 8.34604251 | 5.73222903 | 6.67534737 | 6.71731999 |
| 5.99314967 | 6.71336864 | 6.90146549 | 6.72163378 | 5.66977741 | 5.94787254 | 5.8747146  |
| 6.9497742  | 8.56606317 | 8.65680953 | 8.49152044 | 6.55963895 | 7.03478356 | 7.50269101 |
| 6.58600853 | 8.47373253 | 8.51762294 | 8.42939712 | 6.62150701 | 7.11092277 | 7.20485574 |
| 6.17729295 | 7.21002935 | 6.86668918 | 6.87960163 | 6.51002276 | 6.07503582 | 6.49548539 |
| 7.82123825 | 10.5892289 | 9.91079576 | 9.71067679 | 8.66699264 | 8.53852885 | 8.64855784 |
| 6.13005095 | 7.70902728 | 7.83771938 | 7.73079889 | 6.3406908  | 6.76751974 | 6.11243575 |
| 6.79529811 | 7.93116181 | 8.13608011 | 7.98805976 | 5.94390797 | 6.83686586 | 6.82944622 |
| 6.44305708 | 7.43183103 | 7.64960253 | 7.52175981 | 6.06018577 | 6.20270901 | 6.14969165 |
| 6.24430484 | 7.23711721 | 7.97372205 | 7.83320952 | 6.11876711 | 6.5167026  | 6.53960675 |
| 8.66887825 | 9.93336682 | 10.4816673 | 10.4320982 | 7.81891957 | 8.25960581 | 8.57896437 |
| 6.71659863 | 8.13450487 | 8.61314485 | 8.57881043 | 6.53711867 | 6.98125445 | 7.12948189 |
| 6.16426516 | 8.57169994 | 9.29210003 | 9.14972096 | 7.04820239 | 7.56022582 | 7.00920943 |
| 5.64181969 | 6.56487626 | 6.69783497 | 6.754798   | 5.80885223 | 5.82493304 | 5.86734596 |
| 6.71466315 | 10.0274914 | 9.57710966 | 9.58691464 | 6.30398855 | 7.3315234  | 6.76509842 |
| 11.9081967 | 13.629936  | 13.2531192 | 13.1157343 | 12.8692281 | 12.302706  | 12.3042144 |

| <b>C069_NS</b> | <b>C129_NS</b> | <b>C184_NS</b> | <b>P011_NS</b> | <b>C147_NS</b> | <b>C174_NS</b> | <b>C182_NS</b> |
|----------------|----------------|----------------|----------------|----------------|----------------|----------------|
| 12.9578457     | 13.78137       | 13.4527612     | 13.3881922     | 13.4081665     | 13.7249977     | 13.7914031     |
| 6.98056918     | 8.25633703     | 7.44378565     | 7.35967929     | 7.36026506     | 6.71089871     | 7.1586935      |
| 6.7931858      | 8.01637709     | 7.4073842      | 7.40251328     | 6.85686745     | 6.92460707     | 7.2797907      |
| 6.44890525     | 7.83956599     | 6.99493945     | 6.5806145      | 7.10891644     | 5.91872993     | 6.42297603     |
| 7.20968242     | 7.53293484     | 7.05970354     | 6.55180299     | 6.41900857     | 6.61890419     | 6.68362769     |
| 6.75976304     | 7.99859833     | 7.36745232     | 6.96121352     | 7.45675277     | 7.22919567     | 7.11684921     |
| 6.23685076     | 7.44633399     | 6.87117709     | 6.6407233      | 6.60581343     | 6.82521576     | 6.97863496     |
| 5.57202258     | 6.44136246     | 6.15189372     | 5.56130872     | 5.89481073     | 5.86645255     | 5.71386295     |
| 7.02797675     | 8.26980695     | 7.27418524     | 6.66947045     | 6.7918987      | 7.26720149     | 6.94115093     |
| 6.00305438     | 6.91469845     | 6.49869239     | 6.37078905     | 5.99175107     | 6.44576312     | 6.83060267     |
| 6.55553458     | 7.90430285     | 7.00897646     | 7.25400628     | 7.12626773     | 6.80318441     | 6.61837699     |
| 7.75025142     | 8.84806265     | 8.44823486     | 7.97598034     | 7.81988976     | 7.64099827     | 7.67014281     |
| 6.40925515     | 7.44034181     | 7.36754842     | 7.18979294     | 6.95830446     | 6.25223322     | 6.22445998     |
| 6.70716446     | 7.79885928     | 7.38211127     | 7.78060735     | 7.1384039      | 6.92258559     | 7.16282835     |
| 6.63071284     | 7.27037102     | 6.9915774      | 6.4828728      | 7.42339413     | 6.06921        | 6.06431854     |
| 7.35111415     | 7.73603859     | 7.90779861     | 7.4430405      | 7.16110467     | 7.12948086     | 7.10370639     |
| 7.10108379     | 8.23062862     | 7.28098043     | 7.21783753     | 7.22161612     | 7.10155133     | 7.97440484     |
| 7.0358713      | 8.09678683     | 7.58000299     | 8.05280115     | 7.4414204      | 7.24713666     | 7.70894385     |
| 5.3644215      | 5.76155363     | 5.73436171     | 5.45615068     | 5.58533154     | 5.27899725     | 5.35628187     |
| 5.92011653     | 6.7382747      | 6.46569308     | 6.57376336     | 6.10948259     | 6.00078065     | 6.14834743     |
| 8.3169725      | 9.28615967     | 8.52586138     | 8.92847692     | 8.10920748     | 8.11908326     | 7.79585589     |
| 5.11459024     | 6.06241555     | 5.73550214     | 5.41317296     | 5.62950409     | 5.07575509     | 5.25239409     |
| 7.28502855     | 8.24777374     | 7.73772326     | 7.88290711     | 8.15274623     | 7.42584866     | 7.57457082     |
| 11.4435611     | 12.7358636     | 11.9647405     | 11.8403452     | 11.9029641     | 10.7688551     | 11.3643071     |
| 11.5045603     | 12.4799285     | 12.462754      | 12.3437132     | 11.7589219     | 12.5596383     | 12.3081041     |
| 5.70575291     | 6.61044258     | 6.19354448     | 5.58693734     | 5.59560689     | 5.68750222     | 5.57719858     |
| 14.1566678     | 14.4304107     | 14.3809304     | 14.3450254     | 14.2672132     | 14.072115      | 13.9566756     |
| 7.85248082     | 8.78311906     | 8.13136363     | 7.94347305     | 8.37274929     | 7.21060609     | 7.55776083     |
| 6.38019073     | 7.8378764      | 7.23549253     | 6.64655007     | 6.91727898     | 7.07652489     | 6.86003786     |
| 9.39474756     | 10.4298576     | 10.3013887     | 8.67782146     | 9.20971995     | 9.29523331     | 9.12622642     |
| 13.4900712     | 14.6193339     | 14.2593387     | 14.3436021     | 13.9048801     | 13.7518181     | 13.6671781     |
| 12.2470917     | 13.4206932     | 12.7290255     | 12.8474806     | 12.701642      | 12.4877546     | 12.3168113     |
| 5.73084208     | 6.4735439      | 6.32229972     | 6.11874095     | 5.90239803     | 5.60343704     | 5.50114102     |
| 7.75617133     | 8.60342346     | 8.12242476     | 8.07824529     | 7.84631466     | 8.11865562     | 8.37112015     |
| 5.1077021      | 5.64543219     | 5.45797671     | 5.14497591     | 5.195448       | 4.93670719     | 5.22586449     |
| 11.3259036     | 13.3021062     | 12.4594647     | 12.2491078     | 12.4572193     | 11.5313371     | 11.1478924     |
| 8.82447002     | 9.66380624     | 9.11220855     | 9.19249355     | 9.07808648     | 9.77752673     | 10.1744027     |
| 8.57700464     | 9.36331785     | 8.83013266     | 8.99813259     | 8.82275213     | 8.81568814     | 8.9892713      |
| 5.35686322     | 6.53553636     | 6.43346593     | 6.1161622      | 5.92073919     | 5.78302127     | 5.89449476     |
| 6.40254688     | 7.20248727     | 6.76588344     | 6.60423667     | 6.64382012     | 7.14978776     | 7.41891853     |
| 8.87626921     | 10.1119064     | 9.91898857     | 9.00849193     | 9.25131529     | 8.70389492     | 8.75120695     |
| 7.49264636     | 8.69429067     | 8.48272407     | 8.25527648     | 7.9421356      | 7.55709451     | 7.60475113     |
| 6.58566054     | 6.83863416     | 6.74225149     | 6.75378101     | 6.75141819     | 6.12741888     | 6.71150179     |
| 7.43256779     | 8.39449742     | 7.35689209     | 7.61802203     | 7.05983114     | 7.43398763     | 7.30768079     |
| 5.43889296     | 6.82652561     | 6.52151501     | 5.92389554     | 6.02309675     | 5.95957196     | 5.88278682     |
| 8.35766944     | 9.76515115     | 9.31144113     | 9.10610147     | 8.84375087     | 7.97450866     | 7.85056317     |
| 6.6027146      | 7.61570982     | 7.10763557     | 6.80288208     | 6.98198162     | 6.0456675      | 6.70435188     |



|            |            |            |            |            |            |            |
|------------|------------|------------|------------|------------|------------|------------|
| 6.81969884 | 7.77215091 | 7.17163218 | 7.56197065 | 7.07402369 | 7.04089134 | 7.40642187 |
| 6.2837605  | 7.26617748 | 6.75388528 | 6.90273687 | 7.25882322 | 6.42666228 | 6.27330906 |
| 9.87364082 | 10.8564185 | 9.99949976 | 9.81936961 | 10.3209912 | 9.24045554 | 9.8316594  |
| 10.5693069 | 11.6806795 | 11.1211547 | 10.7908445 | 10.6449495 | 10.1036419 | 9.80157516 |
| 6.87910411 | 7.59763843 | 7.02290928 | 7.60584098 | 6.94466522 | 6.42286539 | 6.71552551 |
| 6.53954425 | 6.97021175 | 6.63572828 | 6.62856773 | 6.68688986 | 6.23144143 | 6.37680591 |
| 14.0471418 | 14.9768013 | 14.7141677 | 14.6654397 | 14.3971478 | 14.1880858 | 14.0299273 |
| 6.0638103  | 8.64582701 | 7.69587901 | 7.50828444 | 7.5062195  | 6.87637083 | 7.02278059 |
| 5.93878496 | 6.54260135 | 6.37948009 | 6.31963564 | 5.74187574 | 6.17487317 | 5.82041718 |
| 8.65169179 | 9.73779288 | 9.27400348 | 8.82430007 | 8.63328044 | 8.65947186 | 9.22730668 |
| 5.35355408 | 6.23821555 | 5.8224862  | 5.52203    | 5.68223421 | 5.29664792 | 5.66616093 |
| 7.0743074  | 8.54988976 | 8.13841261 | 8.04270343 | 7.61267834 | 7.09986746 | 6.85974846 |
| 8.60968221 | 10.5925234 | 10.0131286 | 9.35845758 | 9.9340094  | 8.82613755 | 8.57894022 |
| 6.95523491 | 7.8323527  | 7.62367961 | 7.68672252 | 7.21421905 | 6.9150667  | 6.67311541 |
| 6.60621242 | 7.99193561 | 7.60060725 | 7.61953406 | 7.08826671 | 6.7240977  | 6.98945922 |
| 8.55032469 | 9.77362552 | 9.0974059  | 8.69844388 | 9.27673928 | 9.30640603 | 9.10574512 |
| 6.32279273 | 7.4682982  | 7.24312923 | 6.51770592 | 7.07018536 | 6.94737628 | 6.87093429 |
| 5.57679269 | 6.74909979 | 6.45203198 | 5.86171473 | 5.56525504 | 5.83339588 | 5.73142032 |
| 6.79841737 | 8.20792798 | 7.5487256  | 7.5850181  | 7.20118785 | 6.6894697  | 6.58658327 |
| 9.51058202 | 10.0447589 | 9.85834815 | 9.64886931 | 9.53498059 | 9.42869809 | 8.97929257 |
| 6.25182739 | 7.36813363 | 6.46973411 | 6.00810161 | 6.21942373 | 6.06058008 | 6.0716788  |
| 11.2849027 | 12.3636042 | 12.1107355 | 11.5652868 | 11.5576623 | 11.3011143 | 11.0384094 |
| 7.91435643 | 8.85833945 | 8.27580372 | 8.15097847 | 7.99001998 | 8.27831796 | 8.19999961 |
| 7.74297092 | 8.7508664  | 8.0963035  | 8.14565606 | 8.04943691 | 7.27811767 | 7.73546464 |
| 8.10934384 | 9.720786   | 8.67423535 | 8.54019044 | 8.27701906 | 8.19856389 | 8.07628117 |
| 8.71191127 | 9.6398381  | 9.50933896 | 9.15242201 | 8.72013753 | 8.55188549 | 8.21688309 |
| 6.82504145 | 8.02646369 | 8.0311702  | 7.09571876 | 7.13994011 | 7.03382272 | 6.95051274 |
| 8.10169314 | 9.03858077 | 8.56148118 | 8.37622091 | 8.5832227  | 7.7581066  | 7.71313559 |
| 8.68101769 | 10.0279627 | 9.56626948 | 9.23618955 | 9.173846   | 9.17520371 | 8.59715347 |
| 5.47113542 | 6.74067801 | 7.51175107 | 6.40676556 | 5.82801078 | 6.62296299 | 7.12044733 |
| 7.50930313 | 8.19273419 | 7.78249899 | 7.8061829  | 7.54815607 | 7.27440611 | 7.67257668 |
| 7.87820299 | 8.9664371  | 8.37546609 | 8.36615258 | 8.47503542 | 7.8085646  | 7.98599047 |
| 8.36906597 | 10.0146454 | 8.97663744 | 8.64763111 | 8.96736836 | 8.56598971 | 8.68381153 |
| 6.6675473  | 6.84260303 | 7.10504316 | 6.81339386 | 7.23974458 | 6.56363514 | 6.32025378 |
| 7.74599291 | 8.85223642 | 8.34036198 | 8.15146412 | 7.64643559 | 7.80940222 | 8.42888313 |
| 5.43677816 | 6.04984332 | 6.47949897 | 6.02075464 | 5.81135928 | 5.68003314 | 5.43211024 |
| 6.88485674 | 8.10431045 | 7.20925352 | 6.47918011 | 6.80375529 | 6.97383166 | 6.82445856 |
| 7.27494464 | 8.42886806 | 8.29941594 | 8.52338122 | 7.39956676 | 7.18755597 | 7.4898279  |
| 12.6721701 | 14.053012  | 13.4435704 | 13.3229112 | 13.3916692 | 12.4012907 | 12.199868  |
| 9.32072723 | 10.4536482 | 9.94407116 | 9.56180745 | 9.42409153 | 9.24402745 | 9.37167756 |
| 7.61752624 | 8.68605154 | 8.5509399  | 8.11877344 | 7.84322513 | 7.44394143 | 6.90944791 |
| 8.04194821 | 9.59954338 | 8.92906278 | 8.67828146 | 8.63595713 | 7.96386711 | 7.65706902 |
| 6.46695366 | 7.35273999 | 6.84815595 | 6.46768363 | 6.69335453 | 6.28328953 | 6.10574805 |
| 8.67149047 | 9.63421262 | 9.14904948 | 9.8000494  | 9.60972837 | 8.741619   | 8.52213777 |
| 7.7073543  | 8.82318856 | 8.12866201 | 7.87596186 | 7.77736316 | 8.27552952 | 8.09419172 |
| 5.74938785 | 7.07809315 | 6.45634669 | 6.58961909 | 6.55719578 | 6.04141779 | 5.71057035 |
| 7.39751378 | 9.14946084 | 8.47004303 | 7.40046193 | 8.37425964 | 7.95515701 | 7.08682303 |
| 5.70970667 | 6.87910411 | 6.25382121 | 5.78265546 | 5.85772626 | 5.6333414  | 5.18003604 |

|            |            |            |            |            |            |            |
|------------|------------|------------|------------|------------|------------|------------|
| 7.93923422 | 9.12523574 | 8.85179026 | 8.51274639 | 8.33039123 | 8.09429625 | 7.16790181 |
| 7.85761281 | 9.6531333  | 8.97226731 | 8.24837639 | 8.72690511 | 8.48924186 | 8.32982145 |
| 7.60743611 | 8.34074829 | 7.64387999 | 8.35064089 | 7.79081699 | 7.01404391 | 7.58381014 |
| 8.59337768 | 9.57670428 | 8.89064155 | 8.72817665 | 8.30401677 | 7.59423726 | 7.86301913 |
| 11.3480476 | 12.7058302 | 12.1633978 | 12.3182742 | 12.1095591 | 11.3118998 | 11.0955124 |
| 5.82453977 | 6.35732591 | 6.21858435 | 6.4562279  | 6.30266524 | 6.20915758 | 6.14450183 |
| 8.24832515 | 9.16514292 | 8.57162031 | 8.51394112 | 8.0501719  | 8.73598851 | 8.83860769 |
| 5.71504771 | 7.17648335 | 6.19866761 | 6.2477335  | 5.98460895 | 5.87612202 | 5.91246281 |
| 7.54495285 | 8.22475081 | 7.78458512 | 7.19485533 | 8.77931554 | 7.62478376 | 7.404256   |
| 10.9710348 | 11.540764  | 11.496722  | 11.9941105 | 11.5408671 | 11.4865676 | 11.0613935 |
| 6.94132585 | 8.70289991 | 8.18300408 | 7.47871947 | 7.5467363  | 7.18376141 | 6.95846456 |
| 10.3238418 | 11.312917  | 10.8053408 | 10.2353202 | 10.1001078 | 10.9153446 | 10.9750512 |
| 10.0524159 | 11.8997848 | 10.9519935 | 10.3637964 | 10.4972162 | 10.2407472 | 10.5455157 |
| 5.99243627 | 6.71899994 | 6.48320472 | 6.57744046 | 6.26777024 | 6.17632756 | 6.35250184 |
| 6.80411682 | 8.27914021 | 7.36713601 | 7.49865936 | 7.61440287 | 6.19145428 | 5.95732705 |
| 8.89271857 | 9.75841612 | 9.12850478 | 9.5815983  | 9.06915516 | 9.07339423 | 9.18091216 |
| 5.36136097 | 6.45363215 | 5.90622897 | 5.8100775  | 5.91155809 | 5.50508268 | 5.9997439  |
| 12.1822683 | 13.5515881 | 13.0416472 | 12.9502601 | 12.4165875 | 12.5757111 | 12.3145728 |
| 5.51913645 | 5.9524256  | 5.76661636 | 7.24967667 | 6.28959012 | 5.53988649 | 5.34016736 |
| 9.82175135 | 11.2293163 | 11.6317259 | 10.9444844 | 12.8709272 | 10.1565749 | 10.4003234 |
| 9.94326    | 11.0718049 | 10.5461951 | 10.7830359 | 10.3095389 | 10.4785563 | 10.7640298 |
| 10.8227341 | 12.1911231 | 11.3370158 | 11.2834305 | 11.3689336 | 10.0961722 | 10.7928692 |
| 6.70232509 | 7.55070601 | 7.40707313 | 6.82815299 | 6.79254305 | 6.68868533 | 6.57181922 |
| 7.47180119 | 8.70124026 | 7.99160347 | 7.27281078 | 7.32699118 | 7.06347598 | 7.39031343 |
| 6.20935549 | 7.51802756 | 6.97216073 | 6.73676315 | 6.36743467 | 5.91639567 | 6.29143025 |
| 10.1671321 | 11.6273004 | 10.7569616 | 10.3108059 | 10.4185958 | 10.1119624 | 9.83212037 |
| 9.89342122 | 11.4495036 | 11.1277474 | 10.6278813 | 10.6499163 | 10.4209308 | 10.2302907 |
| 7.58158851 | 8.45827208 | 8.089326   | 7.82832947 | 7.58300151 | 7.90187212 | 8.04601187 |
| 6.60497525 | 7.96067561 | 7.40633683 | 7.19994417 | 7.28338288 | 6.84890832 | 7.0005871  |
| 10.4037705 | 11.9735765 | 11.1377411 | 10.8435756 | 10.8678818 | 10.2837933 | 10.174862  |
| 6.03131645 | 6.72364866 | 6.57058588 | 6.48567413 | 6.44428027 | 6.02930689 | 5.98529959 |
| 7.30452747 | 8.18976725 | 7.9992001  | 7.23035194 | 7.19641328 | 7.5342593  | 7.19743886 |
| 9.9216623  | 11.8983584 | 11.0468655 | 10.8735118 | 11.1334556 | 11.0684095 | 10.7849006 |
| 7.02294921 | 7.56677483 | 7.18000858 | 6.72941682 | 7.14271159 | 7.12933248 | 6.84812589 |
| 6.47622014 | 7.94582129 | 7.20918137 | 7.27349071 | 7.03610766 | 6.50635376 | 7.17160717 |
| 11.7422795 | 12.71439   | 12.1357074 | 12.1769071 | 12.1345483 | 12.7248236 | 12.9222876 |
| 6.43382777 | 8.27920197 | 8.5008825  | 8.82662793 | 8.08555425 | 6.62846975 | 7.92455897 |
| 6.89936659 | 8.30752598 | 7.54490186 | 7.50594967 | 7.69633121 | 6.9567374  | 6.97624218 |
| 10.9197066 | 12.615651  | 12.031216  | 11.7116807 | 11.7464782 | 11.5723251 | 11.3157168 |
| 6.7135776  | 7.56725718 | 7.1251324  | 6.77991236 | 7.08576243 | 6.57673481 | 6.94502706 |
| 6.52475091 | 7.45076669 | 7.03417499 | 6.39960623 | 6.82238218 | 6.38039284 | 6.69402073 |
| 6.38051613 | 7.25153543 | 7.02591691 | 6.75042294 | 6.91343399 | 6.77883936 | 6.54547143 |
| 10.9184764 | 11.2282692 | 11.0276545 | 10.6788175 | 10.3155572 | 10.3798614 | 10.3720412 |
| 13.5936736 | 14.2799674 | 14.2487089 | 14.4639317 | 14.1815941 | 13.6481935 | 13.5137917 |
| 7.58526453 | 8.5293837  | 7.96053372 | 8.2619783  | 7.75223746 | 8.30388803 | 8.41064554 |
| 9.67587343 | 11.1804301 | 10.2330756 | 10.336781  | 10.8191261 | 9.5365435  | 10.4354723 |
| 6.38155333 | 7.61903365 | 6.75890808 | 7.14580175 | 6.49871648 | 6.49844204 | 6.21727144 |
| 6.41301586 | 7.11908222 | 6.81897068 | 6.62590723 | 6.42627784 | 6.18636367 | 6.31638545 |

|            |            |            |            |            |            |            |
|------------|------------|------------|------------|------------|------------|------------|
| 6.27111805 | 6.52276779 | 6.4615595  | 6.20904467 | 6.31250418 | 6.43971322 | 6.31755263 |
| 8.31033921 | 9.22426317 | 8.79894479 | 8.50052523 | 8.55221182 | 8.94571743 | 9.29561261 |
| 11.7822288 | 12.19639   | 12.0885279 | 11.0977839 | 10.9588999 | 10.5915887 | 10.7734013 |
| 13.3704667 | 14.0175122 | 13.7711717 | 14.0969984 | 13.7893034 | 13.3722815 | 13.7144173 |
| 8.73291597 | 9.40486503 | 8.77838273 | 8.74716448 | 8.58220334 | 8.45140854 | 8.38417504 |
| 7.29184756 | 8.51368339 | 7.56499161 | 7.142152   | 7.02559916 | 6.97150332 | 6.8770129  |
| 5.78954486 | 6.87455846 | 6.77667779 | 6.82943988 | 5.7074508  | 6.95563364 | 6.15971798 |
| 11.087193  | 12.5490822 | 11.5250779 | 12.0408541 | 11.4828957 | 11.5554179 | 12.0117916 |
| 9.7735164  | 10.6219246 | 10.3165418 | 10.1504416 | 9.68441341 | 9.77923969 | 10.15058   |
| 6.16253413 | 6.65666082 | 6.63966036 | 6.24845988 | 6.33897023 | 6.22655516 | 6.5474398  |
| 10.6473181 | 11.7135631 | 11.1179132 | 11.2957024 | 11.0992748 | 10.8071424 | 11.1726169 |
| 7.43798588 | 8.33284038 | 8.25253251 | 8.38339067 | 8.11294456 | 7.62445699 | 7.4576739  |
| 8.18718577 | 9.42388339 | 8.82296145 | 8.66201176 | 8.46539458 | 9.17698916 | 9.39356357 |
| 5.42637782 | 5.98395125 | 5.76927586 | 5.66059211 | 5.49763887 | 5.4523111  | 5.46397975 |
| 14.0662347 | 14.8963031 | 14.6725082 | 14.6993838 | 14.3282058 | 14.2634181 | 14.2072599 |
| 6.4710816  | 7.66564645 | 7.00429127 | 6.50710579 | 6.84524916 | 7.20836021 | 7.1636044  |
| 6.98063429 | 7.90881051 | 7.14986497 | 6.83821814 | 6.99856899 | 7.15046524 | 7.38079351 |
| 6.15022841 | 7.62142554 | 7.16914333 | 6.6165484  | 6.94383344 | 6.37324607 | 6.0740042  |
| 9.01810446 | 10.4787009 | 9.63462049 | 9.59385309 | 9.49519387 | 9.33089291 | 9.08630955 |
| 5.50399392 | 6.19766472 | 5.98223565 | 5.39793504 | 5.63678556 | 5.58801838 | 5.61238936 |
| 10.3205795 | 12.0734665 | 11.3240776 | 11.1223667 | 11.0701082 | 10.4969955 | 10.2230544 |
| 8.06265764 | 9.09293232 | 8.52060218 | 8.4094741  | 8.5125951  | 8.16957881 | 8.33804194 |
| 7.35024086 | 8.18406255 | 7.81095523 | 7.26223582 | 7.24243674 | 6.68216594 | 6.71445023 |
| 6.17694424 | 6.88534496 | 6.54179638 | 6.55052286 | 6.38090482 | 6.3076522  | 6.66656914 |
| 5.38554217 | 7.16640414 | 6.80958165 | 7.6118636  | 6.35224475 | 6.59238064 | 6.23860995 |
| 7.20503273 | 8.12202193 | 7.68340031 | 7.84308879 | 6.85303503 | 7.33004742 | 7.27760357 |
| 13.5705009 | 14.7516654 | 14.4344588 | 14.327399  | 14.0497371 | 13.678895  | 13.7999362 |
| 5.94941821 | 6.72716488 | 6.14916708 | 5.4094405  | 5.45367001 | 5.51947617 | 5.50011782 |
| 6.52722614 | 7.128645   | 6.7656448  | 6.91074825 | 6.73947685 | 6.85741251 | 7.09290933 |
| 5.89608872 | 6.80628925 | 6.51588462 | 6.37083542 | 6.08700959 | 5.85527166 | 5.56862956 |
| 12.4042744 | 13.0720896 | 12.5603957 | 12.7679825 | 12.6602854 | 13.0814373 | 13.3428275 |
| 7.58514283 | 8.65025979 | 8.31948156 | 7.4679617  | 7.83660649 | 7.64451535 | 8.06224424 |
| 6.88061084 | 8.24959324 | 7.08947802 | 7.52558032 | 7.69958286 | 6.78324841 | 7.08209474 |
| 5.86731977 | 6.83444956 | 6.46247152 | 6.21540583 | 6.15490092 | 5.88239899 | 6.10641281 |
| 5.58983268 | 6.55607268 | 5.93622097 | 5.84544614 | 5.70713519 | 5.86537424 | 5.66956739 |
| 10.1288708 | 11.6449013 | 10.9958526 | 10.6438192 | 10.8959812 | 10.4991722 | 10.9703648 |
| 8.24406837 | 8.28826442 | 9.35086495 | 8.36875002 | 8.6341104  | 8.0356624  | 7.90932309 |
| 9.2328056  | 10.4993785 | 10.2048523 | 9.57038988 | 9.62554046 | 9.03334288 | 8.93129421 |
| 8.92592141 | 10.2065932 | 9.55726648 | 9.51498048 | 9.57009268 | 9.51315119 | 9.60623178 |
| 5.52860945 | 6.0576385  | 6.11571705 | 5.51790398 | 5.72607426 | 5.69893881 | 5.76735447 |
| 5.70129121 | 7.05435035 | 6.56331908 | 6.39940953 | 6.22705734 | 6.0726122  | 6.18213072 |
| 6.65372788 | 8.27980927 | 7.98283105 | 7.91676504 | 8.28464183 | 7.30304095 | 6.25270195 |
| 9.27836768 | 10.3503271 | 9.79851959 | 9.36992009 | 9.0192713  | 8.7691641  | 8.60968886 |
| 6.58544662 | 7.56916219 | 7.46057467 | 7.15634302 | 6.9748287  | 6.20582941 | 6.43767368 |
| 8.66606845 | 9.82713641 | 9.43845858 | 9.11437301 | 9.11907963 | 7.6963799  | 7.84665879 |
| 8.47210024 | 9.54511912 | 9.01285133 | 8.54021989 | 8.59393747 | 8.2168923  | 7.79855151 |
| 7.04969611 | 7.96672635 | 7.92268013 | 8.13918449 | 7.15417913 | 7.59260205 | 7.24102024 |
| 5.64470828 | 6.04694521 | 5.92216502 | 5.78289314 | 5.65419205 | 5.49290748 | 5.57591555 |

|            |            |            |            |            |            |            |
|------------|------------|------------|------------|------------|------------|------------|
| 6.88132201 | 7.54865548 | 7.34888038 | 7.25643422 | 7.08506768 | 6.71901638 | 6.59222439 |
| 11.3554519 | 13.0100973 | 12.4537429 | 11.777843  | 12.3228208 | 11.4765381 | 11.5666568 |
| 9.8447759  | 10.9788241 | 10.2886262 | 10.3351715 | 10.3481395 | 10.8720654 | 11.2123249 |
| 13.383819  | 14.3019441 | 13.9135916 | 14.1650546 | 13.8309578 | 13.6367141 | 13.6190301 |
| 11.5294389 | 12.7844312 | 12.2914631 | 12.3323295 | 12.1422242 | 12.1457682 | 12.1714617 |
| 10.038443  | 11.2238473 | 10.9185346 | 11.2002654 | 11.0293224 | 9.36868564 | 8.84718673 |
| 11.6627565 | 12.7083638 | 11.9480069 | 12.0606446 | 11.9363781 | 11.3692151 | 11.5072283 |
| 6.57952262 | 7.51567225 | 7.32826921 | 6.89120286 | 7.12619544 | 6.22427301 | 6.5199169  |
| 6.90395533 | 7.36244709 | 7.11838361 | 7.1420376  | 6.83671062 | 6.52304736 | 6.54434149 |
| 7.89773355 | 8.18634753 | 8.81591416 | 8.4900803  | 7.22483617 | 7.81898154 | 8.71593111 |
| 8.37946675 | 9.28080835 | 8.83922426 | 8.94992269 | 8.54551089 | 8.83390397 | 8.8840154  |
| 12.3270218 | 13.3475895 | 12.6766872 | 12.7638925 | 12.8211041 | 12.1527529 | 12.3639811 |
| 9.02536523 | 9.94523649 | 9.37493644 | 9.75570914 | 9.35092968 | 9.71837875 | 9.95725327 |
| 6.00405099 | 6.44459452 | 6.22017941 | 6.47941829 | 5.67276504 | 5.70186922 | 6.20146626 |
| 7.35092062 | 8.2452784  | 7.7172055  | 7.90250174 | 7.15127739 | 7.30418611 | 7.72194951 |
| 6.06709851 | 7.17303846 | 6.82635654 | 6.54033095 | 6.87605153 | 5.94714176 | 5.7991513  |
| 12.7451793 | 13.3251227 | 12.7795731 | 12.8185834 | 12.8575112 | 12.4318313 | 12.6814596 |
| 5.55832642 | 6.59183602 | 6.41682049 | 5.75124839 | 5.63325014 | 5.31714666 | 5.69583879 |
| 7.83899713 | 8.44600101 | 8.1809395  | 7.79516302 | 8.04368845 | 7.22059695 | 6.97821165 |
| 8.21605368 | 8.86507656 | 8.70350289 | 8.18664317 | 8.39334197 | 7.76745022 | 8.30467029 |
| 6.11103528 | 6.85112436 | 6.35207327 | 6.4736676  | 5.84220047 | 6.05241089 | 6.21765435 |
| 7.13116348 | 6.19886382 | 6.17167641 | 5.93328511 | 5.86691045 | 5.90334635 | 5.67664259 |
| 7.24172103 | 8.71280554 | 8.03173042 | 7.98566379 | 8.19046227 | 6.69834629 | 6.46656986 |
| 6.31970806 | 7.68937046 | 6.93204345 | 6.43933407 | 6.5351654  | 6.59019659 | 6.6621414  |
| 6.79648614 | 7.65640341 | 7.05113279 | 6.78840905 | 6.54767639 | 6.54379312 | 6.77762618 |
| 9.19672924 | 11.4724441 | 9.89633907 | 9.14878771 | 10.6464795 | 10.2305921 | 10.4575738 |
| 9.6136486  | 10.8013721 | 10.0336377 | 9.81289494 | 9.65810274 | 9.93216868 | 10.0573054 |
| 9.57552185 | 10.5833649 | 10.0570156 | 10.572919  | 9.8527684  | 9.85251203 | 10.4040803 |
| 7.67234118 | 9.19869869 | 8.71555709 | 8.19762708 | 8.4901461  | 7.89034394 | 7.54618991 |
| 7.73334688 | 8.94577038 | 8.36858896 | 8.17937072 | 8.0885699  | 7.47551944 | 7.27576136 |
| 10.9678394 | 12.2861407 | 11.8799818 | 11.386423  | 11.7466369 | 10.6129054 | 10.2950089 |
| 5.74638318 | 6.66932446 | 6.23248904 | 6.63796389 | 5.89896554 | 5.81391455 | 5.94425642 |
| 9.31939507 | 9.92797821 | 9.21844288 | 9.27167195 | 9.36847721 | 9.23183342 | 9.40936526 |
| 7.46926573 | 9.23999751 | 8.59572966 | 7.68523096 | 8.18486295 | 7.45845583 | 7.76335447 |
| 6.6088289  | 8.0006164  | 6.94165684 | 7.41888313 | 6.90959792 | 6.24187736 | 6.46840769 |
| 6.24430655 | 6.96491263 | 6.65121533 | 6.12438956 | 6.08584739 | 6.10494087 | 5.93913464 |
| 8.25555644 | 9.30500013 | 9.25751655 | 9.17440917 | 8.50565716 | 8.51951596 | 8.55032892 |
| 9.98302636 | 11.522067  | 10.8802179 | 10.4469944 | 10.6074025 | 10.3330547 | 10.5414693 |
| 14.000574  | 14.6013762 | 14.5425622 | 14.5705875 | 14.4720822 | 13.7682154 | 13.7496704 |
| 10.3035057 | 12.0404808 | 10.9449177 | 10.6956285 | 10.8249245 | 9.76577606 | 9.77867939 |
| 6.24529637 | 6.69969737 | 6.73451725 | 6.41047069 | 6.30973517 | 6.34461193 | 6.34563269 |
| 8.95814464 | 10.3365534 | 9.75059629 | 9.29527418 | 9.28826927 | 9.29732533 | 9.18197738 |
| 6.86047123 | 7.61056498 | 7.34752482 | 7.16279613 | 6.96817256 | 6.60946865 | 6.44780299 |
| 12.9990238 | 14.4266526 | 13.6460366 | 13.0551779 | 13.3790588 | 12.6584945 | 12.73803   |
| 7.83324748 | 10.1349089 | 8.97230178 | 7.86190079 | 8.58514508 | 8.26988033 | 8.37258172 |
| 8.92656375 | 9.89802208 | 9.45315682 | 9.60772756 | 8.81495571 | 8.26952646 | 9.15472167 |
| 6.26944465 | 6.54937561 | 6.1216222  | 6.09991668 | 5.89073243 | 5.91326403 | 5.99628547 |
| 9.37693715 | 10.4607395 | 10.1327735 | 10.0799834 | 10.0860008 | 9.84990906 | 10.0795741 |

|            |            |            |            |            |            |            |
|------------|------------|------------|------------|------------|------------|------------|
| 6.2179106  | 7.39885568 | 6.23376499 | 6.08816514 | 6.19840123 | 6.58365206 | 6.54049865 |
| 14.2280618 | 14.7158312 | 14.5442062 | 14.6677281 | 14.4886498 | 14.1848684 | 14.2564195 |
| 10.3903625 | 11.392487  | 10.8474567 | 9.87021644 | 10.252948  | 10.8971444 | 10.7431985 |
| 10.91435   | 11.6683758 | 11.1594192 | 11.3891694 | 11.2698251 | 11.5781637 | 11.8034733 |
| 7.99712414 | 9.47067229 | 8.24824876 | 8.72267333 | 8.27064994 | 8.11691521 | 8.5146537  |
| 7.60775566 | 8.8153154  | 8.44097877 | 7.91419077 | 8.14876484 | 8.08152711 | 7.82161137 |
| 6.85291647 | 7.43164134 | 6.90302501 | 7.11471266 | 6.9388668  | 7.46387172 | 7.57469343 |
| 12.0610518 | 12.4585819 | 12.879754  | 12.7914706 | 12.9526415 | 11.1208126 | 10.8365814 |
| 5.30220315 | 5.85803671 | 5.96597817 | 5.44783142 | 5.90624412 | 5.44841072 | 6.54837682 |
| 6.49547388 | 7.16311526 | 6.77394755 | 6.73926486 | 6.48783457 | 6.36286417 | 6.27982134 |
| 6.33570387 | 7.31940478 | 7.28693288 | 6.68302969 | 5.97198492 | 6.2140152  | 6.14379237 |
| 6.67375427 | 7.5717989  | 6.97853201 | 7.42331428 | 6.82372516 | 6.49992416 | 6.88525587 |
| 11.9554625 | 12.9824774 | 12.6269873 | 12.5062032 | 12.5018857 | 11.9420548 | 11.800508  |
| 8.73915514 | 9.40765463 | 9.05083387 | 8.74515765 | 8.54721845 | 7.42571273 | 7.65754498 |
| 7.54288948 | 8.84473997 | 8.72561302 | 8.39867102 | 8.32574123 | 8.43868832 | 7.88128714 |
| 9.10263058 | 10.3744809 | 9.79150122 | 10.203091  | 9.80181957 | 9.34966162 | 9.59286662 |
| 10.3778298 | 11.7140411 | 10.9774467 | 10.2153486 | 11.089473  | 9.52646755 | 9.82365687 |
| 5.99132025 | 6.38245076 | 6.40486226 | 6.71978307 | 6.12656634 | 6.01326282 | 5.88359785 |
| 8.94238255 | 10.480355  | 10.0102232 | 9.61498842 | 9.66832623 | 8.91044066 | 8.73814125 |
| 5.9502316  | 6.50135984 | 6.24440646 | 6.18616219 | 6.07072635 | 6.59029886 | 6.39037999 |
| 13.7306867 | 14.6070794 | 14.4554903 | 14.5733892 | 14.2515068 | 13.8141478 | 13.5990027 |
| 8.11975923 | 8.8480661  | 8.37857101 | 8.33918639 | 8.13209199 | 9.05520406 | 9.45471631 |
| 5.64194249 | 6.48545259 | 6.28942026 | 6.28959603 | 5.81770537 | 5.70610171 | 5.50365149 |
| 6.98288066 | 7.57582284 | 7.27946851 | 7.28962701 | 7.17613025 | 6.75364331 | 6.88238261 |
| 12.247182  | 13.4212062 | 13.0940887 | 13.3888232 | 12.8610101 | 12.7971857 | 12.7740334 |
| 8.32628386 | 9.73764705 | 9.02396111 | 8.71944735 | 8.32612204 | 8.46943221 | 8.55592733 |
| 5.60647747 | 6.35882981 | 5.97596739 | 5.94335783 | 5.85285181 | 5.56866239 | 5.59468977 |
| 6.36519297 | 7.16028895 | 6.98557557 | 6.90586712 | 6.71211012 | 6.27100839 | 6.01268889 |
| 7.30053194 | 8.83254037 | 8.15803755 | 7.97492848 | 8.07291023 | 7.43019744 | 7.30751141 |
| 8.78475327 | 9.63935681 | 9.74621215 | 9.03068589 | 8.48755147 | 8.00724541 | 8.03328864 |
| 8.55372067 | 9.38987652 | 8.77308908 | 8.7721717  | 8.46054395 | 8.41215783 | 8.39068961 |
| 5.63526161 | 6.37532968 | 6.11961078 | 5.81125137 | 5.74842286 | 5.70245586 | 6.05261543 |
| 7.85284408 | 9.09737772 | 8.74279379 | 8.40911001 | 7.93972025 | 7.95229279 | 8.61607828 |
| 6.42602552 | 7.38682043 | 6.71583024 | 6.87408503 | 6.83862912 | 6.70128567 | 6.73649529 |
| 7.44241524 | 8.74163686 | 8.35322712 | 8.15118148 | 7.71610402 | 7.20190042 | 7.1100552  |
| 6.58227569 | 7.15445663 | 6.85270802 | 6.95828706 | 6.70810031 | 6.92634344 | 7.08727931 |
| 6.00605359 | 7.42432504 | 6.78864526 | 5.83863517 | 5.78828296 | 6.21834295 | 6.21427871 |
| 6.06100022 | 7.35616847 | 6.74416917 | 6.23261951 | 6.27225167 | 5.61515348 | 5.59440762 |
| 9.72246398 | 10.2276424 | 9.96821894 | 9.33731928 | 9.5555819  | 9.03368619 | 8.86557214 |
| 9.56021646 | 11.2757689 | 10.4210044 | 10.7424939 | 10.6251718 | 9.68515175 | 9.46262537 |
| 6.20591052 | 6.53204323 | 6.03183274 | 6.18584812 | 6.19900541 | 6.05396258 | 6.23533436 |
| 6.07303528 | 6.75196174 | 6.57030308 | 6.65115935 | 5.89111462 | 6.01104428 | 5.87791059 |
| 6.68679464 | 7.40485715 | 6.97690546 | 7.19195047 | 7.19075904 | 6.71433895 | 6.83243562 |
| 5.9311741  | 6.82088609 | 6.44665672 | 5.99739494 | 5.94427376 | 6.21932324 | 6.54600898 |
| 5.30937412 | 5.97051341 | 5.99488222 | 5.49426263 | 5.43529255 | 5.36925499 | 5.38580754 |
| 11.7093803 | 12.7033352 | 12.3249231 | 12.4623913 | 12.5575401 | 11.9732658 | 12.0514486 |
| 8.31886408 | 9.45009816 | 8.78006038 | 8.39139913 | 8.30973145 | 7.8407666  | 8.26016966 |
| 8.64708349 | 9.79269465 | 9.06540402 | 9.0245488  | 8.61595547 | 8.27591543 | 8.41863608 |

|            |            |            |            |            |            |            |
|------------|------------|------------|------------|------------|------------|------------|
| 8.27488222 | 9.58156554 | 8.96984092 | 8.81442866 | 8.63417032 | 8.25582502 | 8.82012534 |
| 10.7837816 | 11.7472506 | 11.200605  | 11.1609479 | 11.0867168 | 11.7990209 | 11.8959649 |
| 5.96257077 | 7.0477892  | 6.65095264 | 6.35758719 | 6.02211787 | 6.0584492  | 5.86002171 |
| 7.8680385  | 9.64691579 | 8.81549153 | 8.49981082 | 8.37861306 | 7.87886816 | 7.78293009 |
| 7.25751513 | 8.42779597 | 8.01479826 | 8.12052561 | 7.42835766 | 7.00362472 | 6.66824254 |
| 5.5387157  | 6.3159663  | 6.1358726  | 6.0910454  | 6.11948504 | 5.68840783 | 5.76378097 |
| 6.41034976 | 7.93482961 | 7.54591433 | 7.09208796 | 6.78781247 | 6.54825027 | 6.24552457 |
| 9.23864477 | 10.5361297 | 9.72661583 | 9.47052751 | 9.12708329 | 9.35207985 | 9.78429441 |
| 8.1932326  | 9.68440114 | 9.01415664 | 8.75865496 | 8.29585203 | 7.61142471 | 7.86441894 |
| 6.39313386 | 7.28909947 | 6.77017361 | 6.69526727 | 6.46072078 | 5.92576686 | 6.00345495 |
| 6.1012248  | 7.09259648 | 6.7915927  | 6.68414267 | 6.88081652 | 6.36211443 | 6.63059302 |
| 5.72755892 | 6.39952848 | 6.34227116 | 6.06222211 | 6.01507378 | 5.7941     | 5.91175772 |
| 10.0946161 | 11.11603   | 9.80634533 | 10.2080953 | 10.428222  | 9.98961873 | 9.79828872 |
| 7.6504903  | 8.63294977 | 8.11358018 | 8.26569755 | 7.88504595 | 8.30558162 | 8.58186302 |
| 9.33076633 | 10.3071632 | 10.0081933 | 10.1073583 | 9.82178211 | 9.72344679 | 9.55961245 |
| 6.27494762 | 7.26918934 | 7.05368808 | 7.00290276 | 6.1589992  | 6.38238367 | 6.0299599  |
| 5.33982649 | 6.11351382 | 5.81345594 | 5.7151864  | 5.67058572 | 5.68080171 | 5.74257703 |
| 10.316139  | 11.5445796 | 11.3224808 | 10.6383291 | 10.6664948 | 10.1942632 | 10.6696788 |
| 8.58200495 | 9.67981452 | 9.01316576 | 8.76108145 | 8.86229826 | 8.4767134  | 8.21550291 |
| 10.9518828 | 12.8801085 | 12.3855308 | 12.1030855 | 12.1854485 | 10.9165259 | 10.4653174 |
| 5.88770462 | 6.51523369 | 6.25531019 | 6.26049242 | 6.44905122 | 6.53936    | 5.6678785  |
| 5.57591857 | 5.95524119 | 6.11516728 | 5.58877789 | 5.6239479  | 5.38691852 | 5.6113893  |
| 13.5590018 | 14.4860355 | 14.0024336 | 14.2988874 | 14.0968057 | 13.8666772 | 13.9220315 |
| 13.6437469 | 14.7877633 | 14.1858062 | 14.2580338 | 14.0973079 | 13.1455944 | 13.3392376 |
| 9.52458853 | 10.453531  | 9.68808312 | 10.3693651 | 10.6644553 | 10.4948076 | 9.33957524 |
| 5.9241436  | 6.68624838 | 6.13223299 | 6.60785995 | 6.14501464 | 5.87557563 | 6.10477716 |
| 7.05620958 | 8.27273148 | 7.86758455 | 7.70965044 | 7.46978995 | 7.67612281 | 6.94874567 |
| 6.54192799 | 7.49449802 | 7.19246741 | 6.88646357 | 6.67154956 | 6.60877465 | 6.21066764 |
| 6.86145793 | 8.40694307 | 7.62737994 | 7.47879227 | 7.05557962 | 6.90786409 | 7.27348698 |
| 5.93390471 | 6.76933934 | 6.41111147 | 6.02716489 | 6.08451397 | 5.8680348  | 5.61244952 |
| 11.5076311 | 12.7955263 | 12.1194282 | 11.8708714 | 11.8393495 | 11.8094977 | 11.5049679 |
| 8.46954455 | 10.5817166 | 9.46321496 | 10.2471728 | 10.5327377 | 8.11242439 | 9.31746711 |
| 8.66897006 | 9.3600609  | 9.32378685 | 9.53981408 | 8.49448842 | 8.25479526 | 9.34671428 |
| 7.87849423 | 8.54184585 | 8.37284765 | 7.9792211  | 8.04325099 | 7.42754751 | 7.49637127 |
| 7.56863488 | 8.41994122 | 8.0824482  | 7.92219606 | 7.66634403 | 7.57296089 | 7.36115424 |
| 6.9872697  | 7.76711978 | 7.43496009 | 6.97565311 | 7.4930156  | 6.6780071  | 6.56305087 |
| 6.69221515 | 7.41844887 | 7.04868195 | 6.98546855 | 6.44308295 | 6.3858436  | 6.62699464 |
| 8.10013667 | 9.90263966 | 8.78274338 | 8.55493222 | 8.8172523  | 7.73425371 | 7.94686067 |
| 6.17282871 | 7.08117876 | 7.2056271  | 6.88621236 | 6.44881161 | 6.18302811 | 6.01794328 |
| 6.35709344 | 7.80595728 | 7.37311049 | 6.66547521 | 6.90478633 | 7.50433039 | 7.44681781 |
| 9.00368543 | 10.5379774 | 9.85857723 | 9.48654082 | 9.58209681 | 9.07676296 | 8.78148463 |
| 11.2653636 | 12.7674299 | 12.0322672 | 11.9684537 | 11.8387816 | 11.2263983 | 11.2746455 |
| 10.8505385 | 12.419699  | 11.727041  | 11.5217452 | 11.1231055 | 11.552465  | 11.6141609 |
| 8.43937921 | 9.80692382 | 9.82790967 | 9.38513764 | 9.10714435 | 8.65000841 | 7.61883916 |
| 5.81517013 | 6.49145245 | 6.04986706 | 6.27802937 | 5.73417633 | 5.88296872 | 5.76381628 |
| 6.68052972 | 7.96768047 | 7.93176164 | 7.42676961 | 6.30544035 | 6.67939283 | 6.31771089 |
| 10.7025502 | 11.5555785 | 10.7806735 | 11.51922   | 11.6531689 | 10.1993313 | 9.42840519 |
| 7.21021545 | 8.05808321 | 7.87498135 | 7.37321579 | 7.89645109 | 7.0270722  | 7.10159545 |

|            |            |            |            |            |            |            |
|------------|------------|------------|------------|------------|------------|------------|
| 7.19245754 | 8.79623271 | 8.23541498 | 7.92101435 | 7.76992708 | 7.12575337 | 7.10143052 |
| 5.5532794  | 6.49439273 | 6.35860444 | 6.09543732 | 5.63781685 | 5.81897835 | 6.2038045  |
| 7.47545459 | 8.31703086 | 8.34094497 | 8.14283869 | 7.63754577 | 7.1052674  | 7.38238799 |
| 7.93124751 | 9.22429959 | 8.44836042 | 8.92152768 | 8.52488526 | 9.00295084 | 9.32273938 |
| 7.19410479 | 8.41696047 | 7.71119615 | 7.47784001 | 7.81465552 | 6.77552732 | 7.16625148 |
| 11.2324611 | 12.274665  | 11.8081191 | 11.5247542 | 11.5532688 | 10.9014847 | 10.9428062 |
| 7.32331242 | 8.16085012 | 7.92901039 | 7.90030652 | 7.45521049 | 7.09651382 | 7.0983427  |
| 6.69037379 | 8.24564207 | 7.34023823 | 7.50166445 | 7.43612519 | 6.96678805 | 6.61473207 |
| 11.2803445 | 12.3025601 | 11.749554  | 11.9518872 | 11.4855783 | 11.8516495 | 12.175621  |
| 11.6063187 | 12.9196835 | 12.2776254 | 12.4752985 | 12.7478707 | 11.8287157 | 11.8507647 |
| 6.69820042 | 8.44683104 | 9.09556159 | 7.49119732 | 6.20035683 | 5.9429184  | 8.19272679 |
| 5.95507911 | 7.1087722  | 6.50033234 | 6.51835873 | 6.20471179 | 6.1921036  | 5.90305828 |
| 6.27734525 | 7.69068806 | 6.74454191 | 6.68591072 | 7.05667998 | 6.09136641 | 6.25610072 |
| 6.24474134 | 7.3454771  | 6.97056035 | 6.98270957 | 6.3807781  | 6.1099163  | 5.67981955 |
| 9.84349917 | 10.5369786 | 9.97781368 | 10.1396984 | 10.0293024 | 10.764588  | 11.0079341 |
| 10.0436056 | 11.1567499 | 10.412519  | 10.421459  | 10.1032668 | 10.2224206 | 10.1839951 |
| 8.78812645 | 10.3403798 | 9.55567047 | 8.95518085 | 9.5240623  | 8.20021546 | 8.16083903 |
| 9.22968453 | 9.80075077 | 9.49859574 | 9.29029238 | 8.61499504 | 7.83403739 | 7.93694882 |
| 7.94942696 | 8.91273099 | 8.54258347 | 8.49056091 | 8.31329937 | 8.18263172 | 8.66764948 |
| 12.1142444 | 13.1822989 | 12.6935582 | 12.9108578 | 12.6447292 | 12.8495969 | 13.1010754 |
| 6.20080996 | 7.77376957 | 6.67523021 | 6.54781441 | 6.09874525 | 6.53517038 | 5.8840198  |
| 5.92713035 | 6.89870416 | 6.67821701 | 6.54111598 | 6.14659882 | 5.8010342  | 6.03436584 |
| 6.11343526 | 6.47238103 | 6.31919557 | 6.37803192 | 6.44995682 | 5.95414488 | 6.10638266 |
| 6.0156753  | 6.79430669 | 6.37862762 | 6.26128182 | 6.20222415 | 5.77049581 | 5.85863006 |
| 6.22697336 | 6.68683105 | 6.29733689 | 6.41209286 | 6.16376982 | 6.19919333 | 6.35224528 |
| 7.43553359 | 8.76031677 | 8.2139844  | 7.88318824 | 7.63845691 | 7.27230319 | 7.12684486 |
| 8.40749849 | 9.56843879 | 9.54250319 | 9.32910969 | 8.87907653 | 8.06654615 | 7.75776135 |
| 6.51183439 | 7.47435816 | 6.66531886 | 7.04377647 | 6.99207388 | 7.02315331 | 6.94153244 |
| 11.3364379 | 12.8780519 | 12.3548317 | 11.8997497 | 12.2565717 | 11.6324368 | 11.8331728 |
| 8.05150914 | 9.20573559 | 8.99535873 | 8.8452821  | 8.50860415 | 7.64376025 | 7.56309634 |
| 5.38162531 | 7.38923639 | 7.8373441  | 5.25225101 | 7.05696713 | 5.24619524 | 5.05750963 |
| 7.54474811 | 8.43639341 | 8.63077967 | 6.43059539 | 7.7250349  | 7.30172573 | 7.63234457 |
| 8.18799285 | 9.25010131 | 8.44511502 | 8.86032875 | 9.02833045 | 9.10548035 | 9.12204938 |
| 7.12502801 | 8.24201937 | 7.84725596 | 6.73017257 | 7.4713899  | 7.69800242 | 6.85551262 |
| 8.04269522 | 8.81388282 | 8.35927649 | 8.76705951 | 8.19560794 | 7.7818272  | 7.80784433 |
| 8.10660534 | 9.56108723 | 9.04815552 | 8.81309815 | 8.48320149 | 8.11839347 | 7.89998583 |
| 5.85657742 | 6.25912746 | 6.2724846  | 5.51859682 | 5.93470449 | 5.44872754 | 6.03649256 |
| 5.99857057 | 7.69488924 | 6.86523095 | 6.56777982 | 6.67114049 | 6.14817067 | 5.92502456 |
| 9.48614156 | 10.5191104 | 9.9129682  | 10.4737027 | 9.84764276 | 9.32844695 | 9.56438655 |
| 7.08351762 | 9.24274135 | 7.81141965 | 6.55951292 | 7.70713822 | 8.5097564  | 8.19212609 |
| 7.41411692 | 8.53353415 | 8.05203489 | 7.45344021 | 7.84402968 | 7.19673883 | 7.13620369 |
| 6.090469   | 6.69638755 | 6.40761448 | 6.22567751 | 6.1010117  | 6.52200614 | 6.76408469 |
| 8.64945954 | 10.4434057 | 9.70269858 | 9.53287057 | 9.10374992 | 8.90382191 | 8.48876523 |
| 8.90083723 | 10.4046371 | 9.79710931 | 9.70419987 | 9.43403289 | 8.49655383 | 8.5670339  |
| 8.32623127 | 8.65666905 | 8.31478896 | 7.93421925 | 8.00963326 | 7.93702182 | 7.44518788 |
| 6.75896669 | 7.47010568 | 7.32514622 | 7.04859695 | 6.62540289 | 6.56600927 | 6.20382251 |
| 5.64798418 | 6.41164318 | 6.11199237 | 6.01433387 | 5.49985705 | 5.51069614 | 5.73480119 |
| 7.20732187 | 8.60256229 | 8.37121557 | 8.22654128 | 7.73577804 | 7.46925596 | 7.25612658 |

|            |            |            |            |            |            |            |
|------------|------------|------------|------------|------------|------------|------------|
| 7.81410945 | 8.9542635  | 8.62670414 | 8.44799444 | 7.67300513 | 7.67539466 | 7.43673652 |
| 10.1926528 | 11.1109335 | 10.1100461 | 10.108284  | 10.5944049 | 9.69762737 | 10.1464338 |
| 5.88526515 | 6.42479262 | 6.32096225 | 5.8670778  | 6.14343526 | 5.7640985  | 5.47374016 |
| 8.80068542 | 10.2397095 | 9.75400275 | 9.67997317 | 9.24714592 | 8.77908239 | 9.38733195 |
| 7.20672722 | 8.723406   | 8.08529611 | 7.74291031 | 7.72427509 | 7.23695558 | 6.99969001 |
| 6.04668771 | 8.34564387 | 7.011859   | 7.02206482 | 7.25115667 | 6.19699902 | 6.89423936 |
| 7.42875963 | 8.62364742 | 8.3677406  | 8.18587447 | 7.70987165 | 7.40887232 | 7.3539725  |
| 5.74720369 | 6.61729275 | 6.23170984 | 6.13462695 | 6.25291346 | 6.03173748 | 5.8234024  |
| 8.41815916 | 9.79470584 | 9.26003295 | 9.07455066 | 9.12328803 | 8.37394265 | 7.82007171 |
| 5.58727707 | 9.1220007  | 6.32458868 | 5.86978654 | 5.96659358 | 5.84165794 | 5.8546859  |
| 8.26274321 | 9.38803171 | 9.08800375 | 9.01053874 | 8.76672799 | 7.88573358 | 7.95208716 |
| 6.38450766 | 7.10762929 | 7.10580168 | 6.98616174 | 6.40260196 | 6.53288638 | 6.54241671 |
| 7.22853782 | 7.11661428 | 8.13739952 | 8.34621009 | 6.0274175  | 6.89739292 | 6.59017488 |
| 6.32920488 | 7.5187279  | 7.0297168  | 6.34133468 | 6.7208202  | 6.5040672  | 6.87264287 |
| 10.4713491 | 10.770037  | 10.5602239 | 10.9064893 | 10.7481568 | 9.36124703 | 10.5502158 |
| 6.21750527 | 7.98412106 | 8.36840562 | 7.41328266 | 7.57955806 | 7.84875375 | 7.56330612 |
| 9.85820811 | 12.0220213 | 10.9256605 | 10.9750161 | 10.7914087 | 10.5203535 | 10.7591833 |
| 5.94594802 | 6.7709638  | 6.65233304 | 6.27265106 | 6.10726186 | 5.86434663 | 5.77632248 |
| 7.75853504 | 9.11794953 | 8.43235231 | 8.12502594 | 7.87458367 | 7.58369357 | 7.28621674 |
| 12.927009  | 13.9248403 | 12.9222493 | 12.9127256 | 13.3447453 | 12.426694  | 12.8860968 |
| 7.92965728 | 8.21400577 | 8.1639822  | 7.63923723 | 7.62502276 | 7.36959124 | 6.91712261 |
| 11.4315545 | 12.9125576 | 12.238723  | 12.2836634 | 12.0756794 | 12.273228  | 12.6187549 |
| 8.21001717 | 10.0764295 | 9.34450653 | 9.0859581  | 8.90019722 | 9.01456117 | 8.70833693 |
| 10.8317672 | 12.1532306 | 11.262459  | 11.1783605 | 11.492408  | 10.9118024 | 11.3808961 |
| 7.21041127 | 9.13830176 | 8.56384148 | 8.66585001 | 8.60341605 | 8.31153899 | 8.63870452 |
| 7.68732109 | 9.47712743 | 8.58137083 | 9.1531355  | 8.77786975 | 8.13925102 | 8.71461302 |
| 8.00473115 | 6.85876804 | 7.10996956 | 6.40565155 | 7.55105761 | 6.15701217 | 6.60872779 |
| 9.16575294 | 10.2950652 | 9.72398306 | 9.49743094 | 9.34451673 | 9.38073681 | 9.22789772 |
| 5.26472407 | 6.12913668 | 5.63032334 | 5.55887343 | 5.34705472 | 5.55934956 | 5.33116453 |
| 11.113694  | 13.3294754 | 12.041115  | 10.9923535 | 9.11893043 | 12.2916338 | 11.9752773 |
| 6.11987593 | 6.78482065 | 6.33929366 | 6.55695523 | 6.3049724  | 6.29286456 | 6.16000511 |
| 5.81629045 | 6.53396975 | 6.89695597 | 6.63074662 | 6.314206   | 5.94134134 | 6.01084025 |
| 11.0129003 | 11.7774308 | 11.379916  | 11.4953339 | 11.474648  | 11.588739  | 11.1598865 |
| 6.59050531 | 7.50988345 | 7.29602876 | 7.0720018  | 7.07681346 | 6.6455446  | 6.82124591 |
| 9.05497732 | 10.4025868 | 9.62437163 | 9.66566813 | 9.52263881 | 8.31300363 | 8.37467567 |
| 8.95179496 | 9.66310922 | 9.72792777 | 9.79928162 | 9.30977987 | 8.49229666 | 8.67917851 |
| 6.5165113  | 7.26599659 | 6.59368049 | 6.59511274 | 6.40560867 | 6.53545782 | 6.63632083 |
| 9.09090158 | 10.2466919 | 9.99040893 | 9.63872099 | 9.58204354 | 9.16199195 | 8.85647875 |
| 6.59856947 | 7.37092362 | 7.35341063 | 7.06962269 | 6.651577   | 6.34234193 | 6.47062911 |
| 12.0618272 | 13.2230389 | 12.5537382 | 12.6155747 | 12.5704615 | 12.8462896 | 13.1718276 |
| 8.62876157 | 9.40930904 | 9.35176656 | 9.32081589 | 8.87232736 | 7.71181149 | 7.74604869 |
| 5.56929847 | 6.46212759 | 5.973693   | 5.95502399 | 6.00126203 | 5.88559389 | 6.0122017  |
| 7.23537285 | 8.25622851 | 7.74462465 | 7.22475419 | 7.41123725 | 8.06228634 | 7.80410843 |
| 6.32906456 | 7.47245609 | 6.92229777 | 7.57576462 | 6.71388136 | 6.11638971 | 6.50052419 |
| 11.8119406 | 12.4960041 | 11.4278246 | 11.3190195 | 11.4746936 | 11.6324836 | 11.868855  |
| 6.43808705 | 7.46467153 | 7.00347968 | 6.58338098 | 6.72783062 | 6.01326862 | 6.51250535 |
| 7.76166625 | 8.59619348 | 8.1214527  | 8.81099667 | 8.2213933  | 7.75697723 | 7.9972591  |
| 7.29634269 | 8.59387624 | 8.21330694 | 7.88809054 | 7.58675199 | 7.57727624 | 7.4721498  |



|            |            |            |            |            |            |            |
|------------|------------|------------|------------|------------|------------|------------|
| 6.80138374 | 7.35120163 | 6.94245117 | 7.08143657 | 6.92254278 | 6.96250275 | 7.00111878 |
| 6.18364848 | 7.01554998 | 6.9982508  | 6.59664434 | 6.46014279 | 6.00674167 | 6.0117756  |
| 5.88354702 | 6.5552301  | 6.3515778  | 6.11253209 | 5.95262851 | 5.69943947 | 5.83675329 |
| 6.85940806 | 7.68634294 | 7.49093108 | 6.86176187 | 6.84843641 | 6.47569939 | 6.4080272  |
| 9.80178045 | 10.6994857 | 10.0165855 | 10.5297341 | 10.23143   | 10.481747  | 10.7890698 |
| 8.53686341 | 9.89309808 | 9.12450365 | 8.76169948 | 8.77230963 | 8.4559009  | 8.30375518 |
| 11.1522196 | 11.9300524 | 11.6041302 | 11.5617629 | 11.3237692 | 11.7287488 | 11.9397111 |
| 8.36358812 | 8.88460097 | 8.98535669 | 8.18801512 | 8.08894297 | 8.04602279 | 7.86246503 |
| 6.17559186 | 8.18594879 | 7.44675662 | 7.40256188 | 7.19551198 | 6.98098152 | 6.23461954 |
| 7.48280392 | 8.7792305  | 8.54982548 | 8.35832768 | 8.44993521 | 7.29359488 | 7.56612865 |
| 7.39609354 | 8.60750084 | 8.0908148  | 7.74278369 | 7.2802836  | 7.72713765 | 7.03729875 |
| 10.644845  | 11.5431121 | 11.1096335 | 11.1631842 | 11.1820343 | 11.588717  | 11.9947293 |
| 5.64892355 | 6.47953923 | 6.47577428 | 5.82696204 | 5.78169858 | 6.12219291 | 5.92028401 |
| 12.687207  | 13.9140674 | 13.4107389 | 13.5215698 | 13.2939041 | 13.3810454 | 13.6776029 |
| 6.4564157  | 7.38160005 | 7.19945642 | 6.37806522 | 6.21893845 | 6.51857715 | 6.19471431 |
| 8.8214041  | 9.60079678 | 9.0661258  | 9.24899443 | 8.85172062 | 9.49702729 | 9.85948804 |
| 8.10169577 | 9.41813807 | 8.77267483 | 8.6831227  | 8.77338519 | 8.02600381 | 7.86949391 |
| 6.05198586 | 6.48127504 | 6.25207083 | 6.22666805 | 5.8443284  | 6.02755927 | 5.93962129 |
| 8.06665378 | 9.53518185 | 8.30476656 | 8.64640966 | 8.50457352 | 8.23964674 | 7.84068478 |
| 5.58757862 | 6.013433   | 5.75420767 | 6.20923968 | 5.72376004 | 5.74234151 | 6.00176892 |
| 6.97040619 | 7.59111613 | 7.07939518 | 7.11878745 | 7.02392397 | 6.69562502 | 6.7877276  |
| 5.43518919 | 6.06669693 | 5.90155479 | 5.56822094 | 5.63343586 | 5.71141066 | 5.74642188 |
| 5.75072949 | 6.21904884 | 6.01495845 | 5.69360209 | 5.77530555 | 5.68208192 | 5.72669773 |
| 6.00109986 | 6.70139103 | 5.99002134 | 6.37996867 | 5.97855695 | 5.76035989 | 6.12292633 |
| 5.87613013 | 6.93729142 | 6.2771477  | 6.55410148 | 6.16439048 | 5.5955702  | 5.77516646 |
| 5.35938482 | 5.82427347 | 5.6358603  | 5.36674884 | 5.4063353  | 5.32452585 | 5.26076865 |
| 6.08485451 | 6.67921406 | 6.34346183 | 6.27650988 | 6.17142843 | 6.02103681 | 6.38011712 |
| 7.29880401 | 8.12033742 | 7.65287221 | 7.74927279 | 7.83314626 | 7.07057073 | 7.19162878 |
| 6.02315464 | 6.82068701 | 6.21181823 | 6.34641764 | 6.02557037 | 5.69182279 | 5.90089385 |
| 6.73692006 | 7.8284507  | 7.2884084  | 7.79663993 | 6.84875437 | 6.38577804 | 6.35587293 |
| 5.52475451 | 6.04657597 | 5.75376577 | 5.90990676 | 5.43138829 | 5.4569244  | 5.48739534 |
| 5.51646781 | 6.22810756 | 6.38389054 | 5.55092744 | 5.71807909 | 5.79609855 | 6.11304763 |
| 6.37797242 | 6.92810379 | 6.63553835 | 6.70970282 | 6.28355791 | 6.41557903 | 6.1573528  |
| 5.44116274 | 6.0107729  | 5.91132056 | 5.44389967 | 5.57668659 | 5.47400408 | 5.39551254 |
| 7.09255314 | 8.32597593 | 7.6365949  | 7.68623157 | 7.25268152 | 6.66608621 | 6.79952642 |
| 5.92655266 | 6.74173797 | 5.94108541 | 6.44060543 | 6.03929876 | 5.86645799 | 6.46671472 |
| 7.00010933 | 7.84583877 | 7.1697677  | 7.27942208 | 6.83510551 | 6.63201674 | 6.69486348 |
| 5.94120657 | 6.79399859 | 6.48044561 | 6.51553207 | 6.3327176  | 5.86427209 | 6.05898833 |
| 5.53455284 | 6.26891192 | 5.97061326 | 5.7369839  | 5.6048921  | 5.53592355 | 5.52473477 |
| 6.71821228 | 8.34966914 | 7.5629964  | 7.2391641  | 7.24453985 | 7.43715615 | 7.18859973 |
| 5.79977222 | 6.97359521 | 6.77183541 | 6.56029095 | 6.65616169 | 6.14273793 | 6.32846742 |
| 6.66918696 | 7.41581358 | 7.01759125 | 6.97324619 | 6.8327065  | 6.36883521 | 6.56827735 |
| 6.73020926 | 7.34549839 | 7.24773862 | 7.05636785 | 7.09720098 | 6.68366558 | 6.68288506 |
| 5.91311321 | 6.7899835  | 6.28293421 | 6.22671178 | 6.10688261 | 5.83947819 | 5.77371657 |
| 5.17930841 | 5.73805766 | 5.67471741 | 5.26194371 | 5.18166353 | 4.99717316 | 5.24943245 |
| 6.08724748 | 7.29611505 | 6.9567223  | 6.90527869 | 6.66119235 | 5.87797389 | 5.82262742 |
| 5.32185812 | 6.17319761 | 5.61750831 | 5.28294644 | 5.32783069 | 5.68395438 | 5.4367182  |
| 5.84644793 | 7.28383568 | 6.03904822 | 6.38635072 | 6.9394605  | 6.00157889 | 6.53100163 |

|            |            |            |            |            |            |            |
|------------|------------|------------|------------|------------|------------|------------|
| 5.43243667 | 6.22574074 | 5.86338792 | 6.32333206 | 5.7435699  | 5.23432159 | 5.64363631 |
| 5.99205529 | 6.84959776 | 6.23093098 | 6.16628824 | 5.8613001  | 5.96721012 | 5.85787229 |
| 5.95296368 | 6.66373598 | 6.4156882  | 6.16288151 | 6.25171663 | 5.87742304 | 6.1751567  |
| 5.88455616 | 6.00813411 | 5.97823888 | 6.11048143 | 5.64664079 | 5.61024915 | 5.87540534 |
| 6.16294353 | 7.62421278 | 7.07082186 | 6.71863288 | 6.40952111 | 6.37188413 | 6.12040316 |
| 6.41979067 | 7.61762908 | 7.0547302  | 6.51732027 | 6.94936684 | 6.76242855 | 6.92708578 |
| 7.60906199 | 8.6232893  | 7.93066225 | 8.13858463 | 7.80152342 | 7.86446785 | 7.95673392 |
| 6.97102731 | 8.20045776 | 7.69686393 | 7.52311026 | 7.02523814 | 6.64546102 | 6.60624485 |
| 5.43331102 | 5.96573373 | 5.95904051 | 5.813029   | 5.69921318 | 5.53711246 | 5.51724829 |
| 6.51280082 | 7.2758647  | 6.51493887 | 6.83588493 | 7.50764878 | 6.31611207 | 6.65363761 |
| 5.95314113 | 6.26386165 | 6.05005759 | 6.2967228  | 6.0555306  | 5.82990891 | 5.78403828 |
| 6.38604595 | 7.8314276  | 7.08964221 | 6.73316857 | 6.86621316 | 6.32445313 | 6.38501301 |
| 7.98189431 | 8.99991518 | 8.45444407 | 8.02571099 | 7.93759275 | 7.52553725 | 7.51841554 |
| 5.52032072 | 6.46192107 | 6.06250751 | 6.18505381 | 5.58463636 | 5.52961983 | 5.75786893 |
| 6.71838081 | 7.61362226 | 7.01337516 | 7.07628865 | 7.0630995  | 6.22029919 | 6.20186691 |
| 6.03483659 | 7.63769791 | 6.35637186 | 6.9685781  | 6.18556708 | 6.03310293 | 6.405231   |
| 5.36958967 | 6.60397596 | 5.83917304 | 5.57048631 | 5.72125863 | 5.45452007 | 5.5703175  |
| 6.06498931 | 7.33479708 | 6.64018969 | 6.60472564 | 6.32554814 | 6.15478713 | 6.39747117 |
| 5.72038956 | 6.35421288 | 6.0352137  | 5.81928268 | 5.88741609 | 5.48817692 | 5.61241443 |
| 5.31336486 | 5.79547242 | 5.63067485 | 5.23331634 | 5.29536378 | 5.02893774 | 5.17761328 |
| 5.342133   | 5.78145965 | 5.74190755 | 5.56984103 | 5.40951653 | 5.2965679  | 5.47238606 |
| 6.38594814 | 7.14115993 | 6.73429233 | 6.00001195 | 6.43445543 | 6.21018038 | 6.30913598 |
| 5.32224581 | 5.92497636 | 5.61418096 | 5.38761241 | 5.42632481 | 5.4317834  | 5.43692171 |
| 5.93683814 | 6.86775565 | 6.33990789 | 6.26099422 | 6.14174442 | 5.70936426 | 6.18454254 |
| 5.45820481 | 5.96906505 | 5.67730978 | 5.50677774 | 5.66091037 | 5.41504167 | 5.56358923 |
| 5.35256434 | 5.68994907 | 5.66479171 | 5.25886373 | 5.50529646 | 4.98697243 | 5.28183695 |
| 6.57483357 | 7.37827751 | 7.40141715 | 6.84185742 | 7.1325388  | 6.57981206 | 6.17849854 |
| 6.07513404 | 7.09558691 | 6.65565665 | 7.31916449 | 6.44835852 | 5.96110862 | 6.02173577 |
| 5.81272924 | 6.18003684 | 6.05998943 | 5.62453639 | 5.75840579 | 5.54573645 | 5.41825405 |
| 6.57510898 | 7.61555902 | 7.47353286 | 7.80824281 | 6.76783883 | 6.3507626  | 6.25386771 |
| 6.64139921 | 7.82025173 | 7.06167793 | 7.07770552 | 6.8774866  | 6.24116557 | 6.384136   |
| 5.60956025 | 6.73568328 | 6.33857132 | 6.04503008 | 5.87982215 | 5.97030472 | 5.86417128 |
| 7.60135779 | 8.91563981 | 8.4620425  | 8.11122124 | 8.19224053 | 7.75408712 | 7.83615895 |
| 5.752204   | 6.55071401 | 5.96998069 | 6.20428238 | 5.97307189 | 6.16146307 | 6.6125399  |
| 6.68009505 | 7.2965088  | 7.06232143 | 6.93237895 | 6.32102072 | 6.70387728 | 6.88071124 |
| 5.99503423 | 6.50087581 | 6.29681015 | 6.58053521 | 6.21078081 | 5.699953   | 5.59946777 |
| 5.72091539 | 6.72892455 | 5.98858381 | 6.56414873 | 5.73712455 | 5.45822482 | 5.93190687 |
| 7.98991954 | 8.90444526 | 8.35019002 | 8.75860533 | 8.32064714 | 8.1949597  | 8.48349456 |
| 6.47331205 | 7.00691286 | 6.82926861 | 6.21205392 | 6.61827772 | 6.17790384 | 7.07347537 |
| 6.27329358 | 7.23157737 | 6.84920991 | 7.21782396 | 6.35473406 | 5.99907435 | 7.07229878 |
| 5.56472203 | 6.17460596 | 5.83182025 | 5.84972435 | 5.86421116 | 5.27658339 | 5.45950933 |
| 5.85628882 | 7.32116507 | 6.20403563 | 6.38850109 | 6.02187721 | 5.88760788 | 6.03005462 |
| 11.6076087 | 12.8646884 | 12.1888985 | 11.9793209 | 11.9851574 | 11.1476215 | 11.8484645 |

| C289_NS    | C139_NS    | C120_NS    | C063_NS    | C019_NS    | C269_NS    | C284_NS    |
|------------|------------|------------|------------|------------|------------|------------|
| 13.2477475 | 13.757916  | 13.5709183 | 13.6264836 | 13.8617548 | 13.0012666 | 13.2040693 |
| 6.59928536 | 7.57733214 | 7.90435283 | 8.0113307  | 7.20382858 | 6.39430663 | 6.56459629 |
| 6.51846495 | 7.3070669  | 7.29080866 | 7.10529779 | 7.2434187  | 6.47646562 | 7.04226457 |
| 6.36595913 | 7.39293473 | 6.82305    | 5.82649663 | 7.13659541 | 5.84396601 | 6.48265567 |
| 7.06749137 | 7.37265441 | 7.12439121 | 7.13794405 | 7.45540449 | 7.03911755 | 6.10511693 |
| 7.35340799 | 7.89085644 | 8.15842136 | 8.11571736 | 7.62380103 | 6.80584574 | 6.69563198 |
| 6.91244988 | 6.86224184 | 7.26589348 | 6.87125103 | 7.27361752 | 6.16686083 | 6.20065108 |
| 5.56875388 | 6.09021746 | 6.37324155 | 6.31181424 | 6.0881346  | 5.94680711 | 6.12413807 |
| 6.9740302  | 7.96347644 | 7.88018165 | 7.52624178 | 7.60035971 | 6.58802663 | 6.64765845 |
| 6.06439098 | 6.76182778 | 6.70237496 | 6.75662837 | 6.70728182 | 6.15893358 | 6.51406386 |
| 6.37660035 | 7.31455877 | 7.32110011 | 6.91621388 | 7.13578725 | 6.33583319 | 6.92110423 |
| 7.56450088 | 8.72836544 | 8.43361215 | 8.11478553 | 7.98015043 | 7.27103249 | 7.87375969 |
| 6.18783523 | 6.64030525 | 6.88757645 | 7.20922622 | 6.73260568 | 5.96721104 | 5.83679266 |
| 6.67671733 | 7.9188847  | 7.58575802 | 7.36235153 | 7.25960111 | 6.42352103 | 7.3438244  |
| 5.80366231 | 7.52631222 | 7.26771182 | 8.09033688 | 7.65276468 | 6.43273514 | 7.46666219 |
| 6.95744685 | 7.48795336 | 7.32717356 | 6.95324778 | 6.88783717 | 6.64591489 | 6.92495973 |
| 6.69442893 | 8.27208899 | 7.57872441 | 7.20277815 | 7.37685817 | 6.41331109 | 7.67960958 |
| 6.81997084 | 8.17787047 | 7.8518015  | 7.43096096 | 7.80322058 | 6.46158094 | 7.81717362 |
| 5.33276593 | 5.61637711 | 5.73465652 | 5.85009255 | 5.83147903 | 5.51692033 | 5.46646692 |
| 5.68428155 | 6.3664635  | 6.49230876 | 6.22178159 | 6.2428277  | 5.97589702 | 6.13163352 |
| 7.14090133 | 7.42589061 | 8.77061666 | 8.67807895 | 8.72759105 | 7.90924868 | 6.76762435 |
| 5.13787563 | 5.96529045 | 6.01865687 | 5.83211531 | 5.61788029 | 5.36878127 | 5.39800245 |
| 7.15042868 | 8.96248077 | 8.2833727  | 8.37633423 | 8.11576157 | 7.02706224 | 7.267621   |
| 11.7709558 | 12.2153407 | 12.5677448 | 11.9283896 | 11.7851332 | 11.3925187 | 11.2311888 |
| 11.9103538 | 12.1140364 | 12.437652  | 12.6678001 | 12.7254562 | 12.0800707 | 10.7177475 |
| 5.66658761 | 5.95518933 | 6.14771474 | 6.08519709 | 6.14786287 | 5.70548835 | 5.66453774 |
| 13.6351059 | 13.9622797 | 14.1030665 | 14.2569738 | 14.1765191 | 13.7356597 | 13.4822193 |
| 7.53270112 | 8.33168014 | 8.20874257 | 8.26399119 | 8.20102902 | 7.70706849 | 7.1386179  |
| 7.29333094 | 7.40744623 | 7.74491051 | 7.71477304 | 7.70884248 | 6.42463426 | 6.03501415 |
| 9.35603704 | 10.0171341 | 9.90589314 | 9.91675324 | 9.83445556 | 8.71161914 | 7.95602993 |
| 13.5463302 | 14.0432324 | 14.1900129 | 14.0513169 | 13.6437333 | 13.756352  | 13.4545679 |
| 12.4201205 | 12.7348821 | 12.8867959 | 12.8499236 | 13.1851429 | 12.3025927 | 12.4243479 |
| 5.34417694 | 5.99324027 | 6.3287496  | 6.36665513 | 5.74941547 | 5.49203519 | 5.55548458 |
| 7.86944024 | 8.7930375  | 8.720667   | 8.32854434 | 8.23750492 | 7.34104997 | 7.52265999 |
| 5.11935286 | 5.5962998  | 5.67297233 | 5.63113048 | 5.21428104 | 5.26194145 | 5.15333638 |
| 11.7384077 | 12.5923503 | 12.4541952 | 12.1154654 | 12.4612546 | 11.0079453 | 10.8929806 |
| 9.29575149 | 10.1842233 | 9.94778624 | 9.89503127 | 10.343621  | 8.76564248 | 8.66811239 |
| 9.23513778 | 9.98306058 | 9.74579666 | 9.3710805  | 9.2207152  | 8.63689356 | 9.0496501  |
| 5.85169108 | 6.61524737 | 6.42519928 | 6.69486488 | 6.24839802 | 5.76718309 | 5.89048147 |
| 6.65472767 | 7.67642539 | 7.16043015 | 6.991159   | 7.36572753 | 6.46705217 | 6.53603331 |
| 8.89481564 | 9.32290046 | 9.72109081 | 9.30693639 | 9.3158078  | 8.35398264 | 7.98589828 |
| 7.74688847 | 8.0185702  | 8.09637256 | 8.03827978 | 7.86439975 | 7.10827353 | 7.54106098 |
| 5.96388607 | 7.18808041 | 7.41190752 | 6.5746288  | 7.2267898  | 7.01948843 | 6.30697233 |
| 7.05169728 | 8.02494848 | 8.06717511 | 7.19375795 | 7.23658924 | 6.53152541 | 6.85661725 |
| 5.77002583 | 6.03390463 | 6.46741791 | 5.96479968 | 6.48464328 | 5.75794651 | 5.77710537 |
| 7.36763403 | 9.42260683 | 9.43204052 | 8.91057498 | 8.2792159  | 7.13184153 | 7.51361154 |
| 6.29583504 | 7.63666232 | 7.16744324 | 6.93277105 | 6.78633367 | 6.11872351 | 6.83428395 |

|            |            |            |            |            |            |            |
|------------|------------|------------|------------|------------|------------|------------|
| 6.68969613 | 7.94968783 | 7.6895927  | 7.3982888  | 7.51035434 | 6.58341318 | 6.64737784 |
| 6.09852525 | 6.77312734 | 7.74525952 | 7.28767083 | 7.18289089 | 6.74877652 | 6.87938843 |
| 9.45355791 | 9.87807268 | 10.0436357 | 9.63942555 | 9.45864386 | 9.25662575 | 9.50390185 |
| 10.0390068 | 11.0432625 | 10.8488928 | 10.9429418 | 10.4914543 | 9.83081259 | 9.62323094 |
| 6.1642034  | 7.75243016 | 7.97115035 | 7.35335594 | 7.12389688 | 6.09609926 | 6.86652847 |
| 5.85795015 | 7.01572614 | 6.79820608 | 6.55363605 | 6.5447104  | 6.19511074 | 6.63578834 |
| 13.8071456 | 14.265522  | 14.4242431 | 14.4741026 | 14.6669629 | 13.9015127 | 14.0087394 |
| 6.66146316 | 7.96963345 | 8.26281319 | 7.22703249 | 7.64018853 | 6.28115612 | 6.19923751 |
| 5.58073734 | 6.27445419 | 6.28147831 | 6.10999421 | 5.95478374 | 5.66188952 | 6.08746072 |
| 8.65686208 | 10.244547  | 9.75016866 | 9.49531322 | 9.49156232 | 8.8169238  | 8.64986906 |
| 5.62917299 | 5.92757129 | 6.13046822 | 5.82273525 | 5.88711726 | 5.57335877 | 5.53003421 |
| 6.45478572 | 7.91841665 | 7.93851869 | 7.78573428 | 7.73356381 | 6.89314982 | 6.96041904 |
| 8.97615596 | 10.1195442 | 10.0467993 | 9.62749339 | 9.52371602 | 8.54194494 | 8.3811514  |
| 7.30251007 | 8.43859976 | 8.10044789 | 7.65330943 | 7.34092183 | 6.68361646 | 6.57815649 |
| 6.63002288 | 7.49611237 | 7.74314533 | 7.47556646 | 7.79087302 | 6.44801237 | 6.2567482  |
| 9.41395345 | 10.1181897 | 10.5924757 | 9.80082388 | 8.99823444 | 8.4884656  | 9.59075713 |
| 7.0576019  | 8.03101687 | 7.74708927 | 6.8836648  | 7.28388937 | 6.10563953 | 6.37253462 |
| 6.32303061 | 6.46677344 | 6.85725822 | 6.299315   | 6.3158926  | 5.51824745 | 6.12823277 |
| 6.61173483 | 7.16238529 | 7.32906617 | 7.49982915 | 7.46646398 | 6.55906714 | 6.39760225 |
| 9.01709401 | 10.1513553 | 9.95345077 | 9.97733717 | 9.74416059 | 8.96292983 | 8.82904911 |
| 5.99404631 | 6.95793549 | 7.06117459 | 7.02366787 | 6.73076493 | 6.13901613 | 5.97890833 |
| 11.2543596 | 11.9258841 | 12.0467369 | 11.9308955 | 11.8429812 | 10.9628078 | 11.3495041 |
| 8.21435944 | 8.91986681 | 9.18210479 | 9.00784414 | 8.91628883 | 7.82288371 | 7.0629409  |
| 7.46379164 | 8.29859784 | 8.13454645 | 8.19640246 | 7.99070305 | 7.4947428  | 7.75055358 |
| 7.79472517 | 9.20785479 | 9.2350085  | 9.13859999 | 8.8209282  | 8.05777354 | 7.60474298 |
| 8.33884333 | 8.79707071 | 8.9637761  | 8.95913026 | 8.62482542 | 8.10376041 | 8.52033031 |
| 6.669401   | 7.74473766 | 7.64235862 | 7.58626034 | 7.58840958 | 6.69881716 | 6.22347758 |
| 7.22318118 | 8.12492931 | 8.24798826 | 8.27047989 | 8.80146005 | 7.33154938 | 7.55862734 |
| 9.07306506 | 9.45506291 | 9.74906072 | 9.5462505  | 9.5209119  | 8.68716184 | 8.64784873 |
| 5.43701496 | 8.13782471 | 7.81877708 | 7.03759747 | 7.48603131 | 5.73471558 | 6.48784341 |
| 7.4297532  | 8.74294162 | 8.58898479 | 8.59988533 | 8.37163161 | 7.08813311 | 7.3917514  |
| 7.92928268 | 8.67296166 | 8.95534623 | 9.05079253 | 9.14708635 | 7.9018691  | 7.13181581 |
| 8.42719382 | 9.83715942 | 9.63525033 | 9.10594229 | 8.98751813 | 7.48893751 | 8.1086567  |
| 6.3217867  | 6.65926669 | 6.87340228 | 6.86834724 | 6.72230344 | 6.1920886  | 6.37983372 |
| 8.39892621 | 9.04948919 | 8.94883822 | 8.61203322 | 8.85151357 | 7.66711935 | 8.76894121 |
| 5.49169792 | 5.79883543 | 5.87569112 | 5.85811879 | 5.89258556 | 5.80553598 | 5.62963027 |
| 7.38772613 | 7.40093748 | 7.79290675 | 7.68203809 | 7.45714527 | 6.57331469 | 6.81876111 |
| 6.51074771 | 7.47702479 | 7.68472548 | 7.52821341 | 7.63030062 | 6.81699642 | 7.48507014 |
| 12.2488538 | 13.5047669 | 13.4019821 | 13.479611  | 13.2726329 | 12.0516831 | 11.8397396 |
| 9.29042072 | 10.4193166 | 10.5488672 | 10.2144891 | 9.94826253 | 9.04223912 | 9.45405433 |
| 6.5595634  | 7.31356603 | 7.77221559 | 5.69465319 | 6.09703849 | 7.15301184 | 6.99998986 |
| 7.71256345 | 8.74225924 | 8.56315546 | 8.86922954 | 9.20910727 | 7.94222652 | 7.34810315 |
| 6.08550008 | 6.92646917 | 6.90399147 | 6.76780176 | 6.63257432 | 6.24526899 | 6.41374266 |
| 8.2656413  | 8.88154043 | 8.61743441 | 8.26336358 | 8.80796472 | 8.13816734 | 8.22377922 |
| 7.74710001 | 8.36682183 | 8.7017975  | 8.63524833 | 9.11134828 | 7.37883325 | 6.89705645 |
| 6.23229965 | 6.27283914 | 6.52278944 | 6.74515261 | 6.62029022 | 5.77921322 | 5.77710142 |
| 7.17047092 | 8.98065371 | 9.27621376 | 8.52076442 | 8.69799895 | 7.88792793 | 7.30491346 |
| 5.42019773 | 6.34400556 | 6.43237754 | 6.3112933  | 5.84991472 | 5.3835792  | 5.34180149 |

|            |            |            |            |            |            |            |
|------------|------------|------------|------------|------------|------------|------------|
| 7.42517142 | 8.22954707 | 8.34595516 | 8.80173358 | 8.37700919 | 7.91642051 | 7.03970321 |
| 8.48431298 | 9.12692486 | 9.27325128 | 9.10953869 | 9.13608242 | 8.06043547 | 7.11647601 |
| 6.95577194 | 7.9145143  | 8.0241828  | 7.4939699  | 7.64481815 | 6.93270492 | 6.92265932 |
| 8.22163255 | 8.94933532 | 8.91746219 | 9.01422305 | 8.87304724 | 8.01374474 | 8.58378119 |
| 11.3985588 | 12.3496274 | 12.1200778 | 12.1226433 | 11.7979707 | 11.0474014 | 11.4379258 |
| 5.6546956  | 5.97082352 | 6.25420947 | 6.01110848 | 5.99657766 | 5.89436597 | 6.28855716 |
| 8.25973008 | 9.50889447 | 9.19641328 | 8.59769727 | 8.51340665 | 7.38939903 | 8.23545615 |
| 5.57357751 | 6.30695575 | 6.49731856 | 6.13967249 | 6.34797174 | 5.80131156 | 5.82651722 |
| 8.81135125 | 9.55346899 | 8.66451235 | 8.43018406 | 7.80095812 | 7.63660505 | 7.91808326 |
| 10.8315147 | 11.5608907 | 11.770782  | 11.9288988 | 12.3123773 | 11.0658234 | 8.9108109  |
| 6.45379855 | 8.17898298 | 8.16665018 | 8.24954347 | 7.87623698 | 6.50593522 | 6.72690749 |
| 10.9472658 | 11.5059658 | 11.7779149 | 11.9667174 | 11.0681824 | 9.96757356 | 10.4383844 |
| 10.550209  | 11.8962601 | 11.5057208 | 10.8657511 | 11.0792661 | 9.96231418 | 10.2829112 |
| 5.85376665 | 6.74032991 | 6.94959213 | 6.9662078  | 6.51453181 | 6.21971451 | 6.27709469 |
| 5.78958816 | 6.43713667 | 6.45434026 | 7.10718778 | 6.00178761 | 5.72873385 | 6.10277863 |
| 8.561037   | 9.75534011 | 9.65706812 | 9.78794026 | 9.86800238 | 8.39557912 | 8.39947618 |
| 5.2534508  | 5.95255676 | 5.97356697 | 5.87218679 | 5.82812125 | 5.34915329 | 5.8666877  |
| 12.3793946 | 13.5390825 | 13.5360869 | 12.9071532 | 13.2404408 | 12.1772218 | 12.080004  |
| 6.13155018 | 5.90852689 | 5.88455812 | 5.99609494 | 6.02845069 | 5.50685484 | 6.64368969 |
| 9.66311366 | 11.7731524 | 11.9847374 | 11.7057171 | 11.7667587 | 10.5746966 | 8.84600306 |
| 10.1004652 | 11.647185  | 11.4329803 | 11.2202634 | 10.8477331 | 9.32745205 | 9.27530067 |
| 11.0662197 | 11.7037366 | 12.0551729 | 11.2405248 | 10.9502234 | 10.7470307 | 10.2452259 |
| 6.69094642 | 7.46686282 | 7.36088482 | 7.26799827 | 6.89404286 | 6.58169727 | 6.64007672 |
| 6.91470563 | 8.86838798 | 8.24835172 | 8.18141418 | 7.90435464 | 6.77456306 | 6.76655276 |
| 5.81030145 | 6.60127027 | 6.6390689  | 6.64159892 | 6.38326382 | 6.11978693 | 5.89539279 |
| 9.82745608 | 10.8774889 | 11.1019921 | 10.8366769 | 11.1102954 | 9.78704828 | 9.60363599 |
| 10.1964903 | 10.9091731 | 11.1741361 | 11.2353352 | 10.9638498 | 10.2537317 | 9.50822382 |
| 7.98268904 | 8.68912895 | 8.59262447 | 8.41658644 | 8.06592984 | 7.93077932 | 7.21818832 |
| 7.12171067 | 8.69589501 | 7.54467162 | 7.11099896 | 7.07748336 | 6.43573709 | 7.22543594 |
| 10.0363715 | 11.3529863 | 11.0497301 | 11.3517481 | 10.951335  | 9.76763725 | 9.69626061 |
| 5.97241351 | 6.41686085 | 6.5079045  | 6.75743402 | 6.38640729 | 6.14929229 | 5.85532175 |
| 7.49586302 | 7.63528425 | 7.6205065  | 7.93776633 | 7.58498129 | 6.99111931 | 7.0868952  |
| 11.1113365 | 11.6137508 | 11.6266572 | 11.1088341 | 11.4519791 | 9.97987816 | 9.28762951 |
| 6.99362682 | 7.08407171 | 8.13081661 | 7.57445048 | 7.30879953 | 6.49760199 | 6.73343434 |
| 6.39596317 | 8.02679951 | 7.81701113 | 7.49245249 | 7.13312371 | 6.10673168 | 6.35070692 |
| 12.3012084 | 13.1496027 | 12.7933267 | 12.4867694 | 12.7988367 | 11.6067957 | 12.1691621 |
| 6.57963152 | 7.93338674 | 7.94411173 | 7.76216807 | 7.0763699  | 6.33964463 | 6.05385748 |
| 7.17389796 | 7.98568144 | 8.14714895 | 7.72181079 | 8.00774942 | 6.63945214 | 6.88395066 |
| 10.664209  | 11.721227  | 11.8678305 | 11.6052647 | 11.8311251 | 10.8612506 | 11.4009584 |
| 6.84681547 | 7.43646504 | 7.39920784 | 7.38755555 | 7.45898973 | 6.69464622 | 6.95487445 |
| 6.26476366 | 6.94087383 | 7.15392792 | 7.26593379 | 7.92040348 | 6.43782996 | 5.82895445 |
| 6.51017344 | 7.00259002 | 7.17479489 | 7.29496254 | 7.34076342 | 6.28364661 | 5.87570537 |
| 10.0136409 | 10.473037  | 10.4248875 | 10.0523385 | 11.2810613 | 10.6166674 | 11.0588076 |
| 13.4329372 | 13.9248301 | 13.7818535 | 13.8358126 | 14.3516729 | 13.6339216 | 13.2039563 |
| 7.86117502 | 8.90092928 | 8.69408935 | 8.21371374 | 8.42463661 | 7.48910455 | 7.68298967 |
| 11.9121382 | 11.1886939 | 10.983994  | 11.4512194 | 10.1903173 | 9.50450043 | 10.1841724 |
| 6.72676992 | 6.6499215  | 6.99469625 | 6.92723989 | 7.28165282 | 6.20219672 | 6.1838785  |
| 6.28423076 | 6.97121244 | 6.92676446 | 6.54000649 | 6.71477716 | 6.12897425 | 6.25157728 |

|             |            |            |            |            |            |            |
|-------------|------------|------------|------------|------------|------------|------------|
| 6.00077096  | 6.82601834 | 6.53162553 | 6.42863319 | 6.63827473 | 6.06583379 | 6.23049106 |
| 8.73521617  | 9.53674085 | 9.5255537  | 9.27460133 | 9.49036295 | 8.34309064 | 8.31663136 |
| 10.2232596  | 11.4070585 | 11.9001834 | 12.3964681 | 12.3243575 | 10.9119559 | 11.0442288 |
| 12.9576069  | 13.9580714 | 13.7847698 | 13.6284296 | 14.0307309 | 12.8758655 | 13.3019177 |
| 8.4484393   | 9.4425241  | 9.61763808 | 9.31121495 | 9.05721549 | 8.20126334 | 8.79282998 |
| 6.69073136  | 8.54237569 | 8.1048346  | 7.84841888 | 7.69270825 | 6.73745558 | 6.30783177 |
| 6.3343389   | 6.27610021 | 6.40348878 | 6.16794936 | 5.99518306 | 5.74442081 | 5.73287128 |
| 10.7414181  | 12.7347183 | 12.4809194 | 12.1834481 | 12.059288  | 10.385995  | 10.7779449 |
| 10.0785231  | 10.9180776 | 10.4101884 | 10.4002401 | 10.4359713 | 9.83995864 | 9.80952008 |
| 6.72321041  | 6.75977236 | 6.97723412 | 6.56410863 | 6.6724805  | 6.16869318 | 6.18003365 |
| 10.2632457  | 11.9577996 | 11.807456  | 11.4464212 | 10.9610459 | 9.43146062 | 10.1935488 |
| 7.87290754  | 7.83007528 | 8.19281406 | 8.3342706  | 7.85741935 | 7.87379475 | 7.13924129 |
| 8.66527409  | 9.60972136 | 9.63159198 | 9.3066423  | 9.3241981  | 8.36247778 | 8.59187797 |
| 5.66868335  | 6.39062986 | 6.33797952 | 6.24956423 | 6.08621012 | 5.56728745 | 6.22475708 |
| 14.0350293  | 14.3970669 | 14.4390244 | 14.5930228 | 14.2169269 | 14.3338416 | 14.0191494 |
| 6.88529371  | 7.20252841 | 7.82662793 | 7.22583693 | 7.32290789 | 6.88665501 | 6.5026856  |
| 7.28067985  | 8.00290501 | 8.0187421  | 7.45052753 | 7.40900051 | 6.79076813 | 6.53197651 |
| 6.12452025  | 6.97083985 | 7.17923236 | 7.01989536 | 6.93546564 | 6.13341968 | 6.04616623 |
| 8.56677635  | 9.61031564 | 9.62351849 | 9.73119733 | 9.72549339 | 8.23796948 | 8.27024626 |
| 5.70045026  | 6.09038304 | 6.35281236 | 5.89951958 | 5.6632094  | 5.38646644 | 5.73126608 |
| 10.77111164 | 11.5931245 | 11.8946958 | 11.3877809 | 11.4587803 | 9.8490793  | 9.58763221 |
| 8.9468364   | 9.32487022 | 9.46260942 | 8.85623471 | 8.60014559 | 8.07607857 | 8.49234032 |
| 6.53462878  | 7.49767064 | 7.94154241 | 7.7222563  | 7.54747297 | 6.80300612 | 6.82590517 |
| 6.14801932  | 7.2005838  | 7.37678872 | 7.04671914 | 6.69540092 | 5.85766979 | 6.31841736 |
| 6.39442325  | 6.67886066 | 6.80287175 | 6.86847565 | 6.14989199 | 6.35536431 | 5.99847783 |
| 7.11377654  | 7.06929938 | 7.47675673 | 7.10825576 | 7.22499337 | 7.29729873 | 7.12039031 |
| 13.8183495  | 14.3929828 | 14.2099681 | 14.1430898 | 14.4494279 | 13.5797272 | 13.8532306 |
| 5.33709164  | 6.39656711 | 6.47696957 | 7.70907002 | 7.51279655 | 6.11164441 | 6.10729702 |
| 6.53584006  | 7.32589726 | 7.37256474 | 7.27042989 | 7.16118732 | 6.30565412 | 6.37348257 |
| 5.41650334  | 5.98707001 | 6.11188912 | 5.7978091  | 5.99293743 | 5.83822974 | 5.68813055 |
| 12.8628249  | 13.4964032 | 13.3711368 | 13.1242992 | 13.4439679 | 12.0684387 | 12.7679186 |
| 7.98633641  | 8.98014243 | 9.27388999 | 9.02338733 | 8.58048998 | 6.97449375 | 8.22673297 |
| 6.50765924  | 8.3218537  | 7.40284324 | 7.48933018 | 7.53332973 | 6.70502546 | 6.05881888 |
| 5.80919627  | 6.66478432 | 6.72401172 | 5.9994873  | 6.01267415 | 6.02836449 | 6.02247257 |
| 5.56112875  | 5.93365147 | 6.24408616 | 6.39316682 | 6.11658995 | 6.15316307 | 5.83752324 |
| 10.9800982  | 12.0284569 | 11.9541421 | 11.5637988 | 11.2133552 | 9.58963224 | 10.3790913 |
| 7.84048086  | 8.40795559 | 8.90352007 | 8.22940238 | 8.65662972 | 8.03784507 | 7.07368744 |
| 9.18713157  | 9.68607448 | 9.91307954 | 9.81047138 | 9.63071707 | 9.02231926 | 9.03195478 |
| 9.54864431  | 10.4535001 | 10.3998654 | 10.1656658 | 10.4849256 | 8.58626898 | 7.91420452 |
| 5.44083795  | 6.05756746 | 6.46170699 | 5.98236618 | 5.91886228 | 5.66625412 | 5.65687616 |
| 5.77638987  | 6.41259136 | 6.63434365 | 6.50870008 | 6.41720105 | 6.02381067 | 6.04536084 |
| 6.23316082  | 7.14187417 | 8.82869727 | 7.90847849 | 7.75517468 | 7.22341772 | 7.22675512 |
| 8.7158347   | 9.68694605 | 10.0187552 | 10.3585292 | 10.3056617 | 8.67222554 | 8.77535744 |
| 6.11641591  | 7.04078396 | 7.49280977 | 7.32671081 | 6.63730521 | 5.9022521  | 6.48766385 |
| 8.04285388  | 8.91402539 | 8.725536   | 9.15040025 | 8.61393713 | 8.37145867 | 7.57793784 |
| 7.82404862  | 8.43597398 | 8.68558945 | 8.57115459 | 8.809381   | 7.78655454 | 8.03282322 |
| 6.83763046  | 7.81522253 | 7.64612593 | 7.47626502 | 7.75163243 | 7.08280689 | 6.94216024 |
| 5.30830881  | 5.83208694 | 6.02902258 | 5.93766689 | 5.67672072 | 5.57548721 | 5.7553109  |

|            |            |            |            |            |            |            |
|------------|------------|------------|------------|------------|------------|------------|
| 6.1431048  | 7.46332573 | 7.44234805 | 7.31829515 | 7.23034041 | 6.45267252 | 6.51481866 |
| 11.6867671 | 12.682205  | 12.4423853 | 12.1332501 | 12.479291  | 11.2140355 | 10.9697398 |
| 10.4341059 | 11.464951  | 11.053442  | 10.5742927 | 11.1624398 | 9.76730736 | 10.2028915 |
| 13.11068   | 14.0239302 | 13.8258234 | 13.7779868 | 14.1906396 | 12.8055462 | 13.35702   |
| 12.2499262 | 13.1089783 | 13.0281792 | 12.8252613 | 12.5388633 | 11.6687569 | 11.2508781 |
| 9.09516332 | 9.61495953 | 9.9230092  | 10.0658375 | 10.2494762 | 9.1538565  | 8.2916321  |
| 11.9726123 | 12.6753367 | 12.7935771 | 12.5119283 | 12.1512081 | 11.267482  | 11.6224308 |
| 6.35511408 | 7.58179185 | 7.10109745 | 7.21045511 | 6.7697572  | 6.34981552 | 6.44379278 |
| 6.40829866 | 7.20384326 | 7.52294633 | 7.4882555  | 7.04584265 | 6.65812578 | 6.67366383 |
| 8.72026205 | 9.60141536 | 9.98871025 | 8.4105777  | 9.22103459 | 8.38064461 | 8.20819338 |
| 8.23323043 | 9.34908414 | 9.47783677 | 9.09991531 | 9.19982986 | 7.78805922 | 8.0607143  |
| 12.178869  | 13.0587878 | 13.1710747 | 12.9542608 | 12.4233282 | 11.1978887 | 11.9727278 |
| 9.33440336 | 10.3628457 | 10.2073658 | 9.76828574 | 9.79201197 | 8.55504423 | 9.16570974 |
| 5.77165453 | 6.53733102 | 6.55408443 | 6.23203654 | 6.13633517 | 5.57138709 | 6.08352698 |
| 8.12647579 | 8.74575633 | 8.56385292 | 7.95591082 | 6.7596805  | 6.79004608 | 7.10614414 |
| 6.04931253 | 6.71473046 | 6.82901358 | 6.73735958 | 6.67269405 | 5.77198802 | 5.93185937 |
| 13.0131047 | 13.7300689 | 13.414602  | 13.5464966 | 13.0130597 | 12.6715528 | 12.2525283 |
| 5.31901343 | 6.01456151 | 6.13766213 | 6.14079072 | 5.94452467 | 5.97108987 | 5.70705289 |
| 7.0239916  | 8.4795596  | 8.17136197 | 8.41500735 | 8.19647623 | 7.2368542  | 7.3096928  |
| 8.21499562 | 9.78863743 | 9.80604995 | 9.55110357 | 8.7264641  | 7.71178603 | 7.89016211 |
| 5.71947179 | 6.22572532 | 6.32169202 | 6.63845155 | 6.20053535 | 5.77612136 | 6.13654968 |
| 5.50094797 | 6.00015125 | 8.52009061 | 6.29654551 | 6.13384892 | 6.04320778 | 5.87291493 |
| 6.41124098 | 6.9194843  | 7.11823201 | 7.44906278 | 6.94925477 | 6.68545525 | 6.9240488  |
| 6.52058615 | 7.5874235  | 7.34665379 | 7.00718765 | 7.1807476  | 6.56005505 | 6.29221008 |
| 6.54779837 | 7.65064538 | 7.56895554 | 7.39116109 | 7.00059724 | 6.37804024 | 6.618977   |
| 10.4292728 | 11.9542509 | 11.1112009 | 10.886413  | 10.7120601 | 10.1977106 | 10.0529973 |
| 9.69209674 | 11.1614796 | 11.0707482 | 10.4570545 | 9.98784382 | 9.2020234  | 9.78333747 |
| 9.51543552 | 11.3443503 | 11.0078753 | 10.8630572 | 10.3737961 | 8.73092181 | 9.21494464 |
| 7.5878915  | 8.49012805 | 8.69504277 | 8.37859052 | 8.26739956 | 7.40740119 | 7.70951328 |
| 7.29530426 | 7.74453518 | 8.17725657 | 8.12337909 | 8.00950674 | 7.18965162 | 6.84942262 |
| 10.4194525 | 11.546663  | 11.7479932 | 11.7020489 | 10.8761578 | 10.122322  | 10.4216241 |
| 5.46894785 | 6.16504767 | 6.25482171 | 6.11319728 | 6.22261081 | 5.66856139 | 5.50186584 |
| 9.61502356 | 10.6153988 | 9.91602603 | 9.65755962 | 9.32763707 | 8.74416009 | 9.20824631 |
| 7.99413221 | 8.35435078 | 8.70664037 | 8.20348162 | 8.59525674 | 7.69443102 | 7.908637   |
| 5.86649607 | 7.30676623 | 7.13653389 | 7.00148138 | 6.84573341 | 6.04478141 | 6.21401559 |
| 5.93849588 | 6.38934137 | 6.70736604 | 6.42318871 | 6.63446316 | 5.98887802 | 5.94459775 |
| 8.56486018 | 9.82780887 | 9.90091012 | 9.44096694 | 9.08882745 | 8.53505682 | 8.55681717 |
| 10.7138968 | 11.2450161 | 11.7592541 | 11.4943466 | 10.9382865 | 10.1214791 | 10.0941582 |
| 13.694408  | 14.0648025 | 14.0525867 | 13.8967959 | 14.6738523 | 13.8601908 | 13.6803584 |
| 9.83708749 | 10.9578036 | 10.806341  | 10.7717585 | 10.7411939 | 9.08086042 | 9.63923108 |
| 5.81534359 | 6.80677515 | 6.93226437 | 6.63691023 | 6.56882592 | 5.86685433 | 6.04777502 |
| 8.86693146 | 9.22751535 | 9.36442273 | 9.35354892 | 9.24879809 | 8.51426392 | 9.02337707 |
| 6.12543269 | 6.87838571 | 7.20505718 | 6.98756531 | 6.86256669 | 6.38982095 | 6.58338775 |
| 13.1941023 | 14.0684945 | 13.7953244 | 13.8828178 | 13.8019559 | 12.5122254 | 13.1255727 |
| 8.41128641 | 9.47973116 | 9.86375374 | 9.18268733 | 8.46348636 | 7.3343752  | 8.12067127 |
| 9.04504018 | 9.3468902  | 9.47489655 | 9.3056735  | 9.7353223  | 8.61932607 | 9.18562129 |
| 5.78323374 | 6.94173195 | 6.65115217 | 6.36809311 | 6.21498659 | 5.78183232 | 6.27398969 |
| 10.1393339 | 10.9380637 | 10.9038879 | 10.6839368 | 10.7062517 | 9.87856918 | 9.5787361  |

|            |            |            |            |            |            |            |
|------------|------------|------------|------------|------------|------------|------------|
| 6.59520391 | 7.06686631 | 6.98733906 | 6.45852096 | 7.00268227 | 5.8629884  | 6.03568923 |
| 14.2458773 | 14.3141244 | 14.34987   | 14.2854051 | 14.9443049 | 14.2035575 | 13.89228   |
| 10.3144643 | 11.6794335 | 12.1347132 | 10.7062905 | 10.7247517 | 9.98967833 | 10.1720249 |
| 11.1595018 | 12.0164688 | 11.6696084 | 11.4973803 | 11.8334871 | 10.6662213 | 11.1927551 |
| 7.72316125 | 9.33101074 | 8.47852898 | 7.90050518 | 7.84370188 | 7.41644119 | 8.50743194 |
| 7.62669392 | 8.46321659 | 8.67630232 | 8.5990358  | 9.15039416 | 7.57939288 | 6.61331889 |
| 7.06293982 | 8.07052243 | 7.90586833 | 7.93066047 | 7.85474935 | 6.93630696 | 7.0962492  |
| 10.5656162 | 10.8070788 | 11.2846136 | 11.5962317 | 10.9969098 | 10.4378103 | 10.8382514 |
| 6.22791451 | 5.88842229 | 7.21374873 | 5.79754637 | 5.88672743 | 5.66833956 | 5.40398446 |
| 5.88688615 | 6.83010952 | 6.69304084 | 7.18141667 | 6.76952052 | 6.15502645 | 6.41692552 |
| 5.5191267  | 6.41867605 | 6.18449553 | 6.05638671 | 6.15789864 | 5.99801877 | 5.71266126 |
| 6.09811464 | 7.39299052 | 6.87644205 | 6.71214865 | 6.49865234 | 5.93356863 | 6.85239842 |
| 11.7175501 | 12.57994   | 12.6602727 | 12.4847006 | 12.2940245 | 11.3742358 | 12.0915494 |
| 7.70347797 | 8.79507857 | 8.78401347 | 9.32696736 | 9.03319199 | 7.6862736  | 8.30147196 |
| 7.81169515 | 8.49554687 | 8.940747   | 8.17308845 | 8.74497306 | 7.20162014 | 7.05885005 |
| 8.77791511 | 10.9227375 | 10.4057574 | 10.2709564 | 10.1295677 | 8.90306389 | 8.60032142 |
| 9.89728264 | 11.7367985 | 11.8148608 | 11.2355326 | 10.1075022 | 9.15304934 | 9.24489633 |
| 6.15746922 | 7.44616358 | 6.2967439  | 6.22874906 | 6.32854946 | 5.88216028 | 6.52186909 |
| 8.41576458 | 9.56511122 | 9.67107749 | 9.69152073 | 9.42265539 | 8.55273057 | 8.26647923 |
| 5.9389223  | 6.93180005 | 6.77902985 | 6.56213449 | 6.64350716 | 5.96460864 | 6.09358595 |
| 13.3710619 | 14.1257573 | 14.1228426 | 14.1669845 | 14.1702866 | 13.7164926 | 13.2534464 |
| 8.59382471 | 9.453305   | 9.18100637 | 8.88634864 | 9.34265074 | 8.10910612 | 8.13138679 |
| 5.4635453  | 6.21708625 | 6.23191735 | 6.09402299 | 5.94958512 | 5.58927182 | 5.55399845 |
| 6.49011151 | 6.95754088 | 6.94160873 | 7.15793703 | 7.36133149 | 6.70529647 | 7.12423403 |
| 12.4276182 | 12.9752651 | 13.1087571 | 13.1068168 | 12.7945938 | 12.3970411 | 11.8944775 |
| 8.13242467 | 8.92424778 | 8.99036553 | 8.90353905 | 8.79383282 | 7.68028989 | 8.3344114  |
| 5.7912064  | 6.02404658 | 6.394944   | 7.76585627 | 6.34330406 | 5.64397535 | 5.80515984 |
| 5.80699627 | 6.67821701 | 6.86321742 | 5.78773387 | 5.67045203 | 6.017628   | 6.14738832 |
| 7.19468792 | 7.94402034 | 8.08271696 | 8.03861451 | 8.24682656 | 7.1827489  | 6.59285272 |
| 7.65105169 | 8.37645666 | 8.66864251 | 8.78578527 | 8.9995784  | 8.14833218 | 8.20248335 |
| 8.00353422 | 9.28562369 | 9.27217113 | 9.19503872 | 8.37300301 | 7.51442845 | 8.09036123 |
| 5.7112314  | 6.21304452 | 6.15000638 | 6.2831882  | 5.82626399 | 5.55494181 | 5.83109819 |
| 8.34506632 | 9.00087155 | 8.89186723 | 9.42791976 | 9.36571134 | 8.65853962 | 9.04462963 |
| 6.9911023  | 7.30134346 | 7.72866543 | 7.30925624 | 7.10099446 | 6.37161427 | 6.78291305 |
| 6.70805201 | 7.73463715 | 7.90824069 | 8.0620904  | 8.32306377 | 7.28465848 | 6.5488404  |
| 6.46404136 | 7.49285382 | 7.45695806 | 7.44126684 | 7.16296729 | 6.3395748  | 6.447822   |
| 5.81287246 | 6.43181248 | 6.34603001 | 6.48580275 | 6.07253975 | 5.57462471 | 6.08072587 |
| 5.66565654 | 6.3348137  | 6.14311317 | 6.38478789 | 6.25117921 | 5.52080629 | 5.56370606 |
| 8.90202834 | 9.93305251 | 9.83195449 | 9.66203829 | 9.33301353 | 8.78291698 | 8.69114992 |
| 9.21441335 | 10.424139  | 10.2727348 | 10.2394685 | 10.4324438 | 9.21262454 | 8.64984356 |
| 5.67389162 | 6.85535689 | 7.07118667 | 7.02062887 | 6.63875403 | 5.74602597 | 5.73721002 |
| 5.31457001 | 6.17199739 | 6.32627847 | 6.22167412 | 6.20115256 | 5.81706858 | 6.03440766 |
| 6.71579593 | 7.70615132 | 7.3220426  | 7.25135743 | 7.06269703 | 6.56926869 | 6.87329522 |
| 5.82701236 | 7.23772909 | 6.79590069 | 6.62624769 | 6.67068032 | 6.08473463 | 6.03413162 |
| 5.30229309 | 6.2395382  | 6.17241491 | 6.05518177 | 5.84381907 | 5.5874397  | 5.70841819 |
| 11.9184641 | 12.8606903 | 12.7734333 | 12.5993397 | 12.7298648 | 11.224021  | 10.8503119 |
| 8.81122921 | 10.7863472 | 10.0870239 | 10.2075439 | 9.22469439 | 7.94358382 | 6.31685641 |
| 8.21636319 | 9.28259595 | 9.02455461 | 8.91305245 | 9.22508425 | 8.13773456 | 8.1751528  |



|            |            |            |            |            |            |            |
|------------|------------|------------|------------|------------|------------|------------|
| 8.51232685 | 9.71134502 | 9.19490899 | 9.25052132 | 8.93509844 | 8.88914191 | 8.82624371 |
| 11.2216143 | 12.061009  | 11.777737  | 11.4988866 | 11.7906491 | 10.9236053 | 11.2740549 |
| 5.7487301  | 6.61355316 | 6.78784381 | 6.6170704  | 6.49049777 | 5.98692671 | 5.67091396 |
| 8.27089985 | 9.45189726 | 9.39647891 | 8.8702038  | 8.68846259 | 7.95809098 | 8.02819838 |
| 6.89681675 | 8.04827161 | 8.41777405 | 8.41174739 | 7.73393998 | 6.85359152 | 6.867684   |
| 5.53255791 | 6.07850779 | 6.13976989 | 6.41789132 | 5.96795224 | 6.00260802 | 5.83383303 |
| 6.20346488 | 8.0059776  | 7.82661077 | 7.54577768 | 6.86414776 | 6.23644459 | 6.13167817 |
| 9.58218697 | 10.5254004 | 10.1529971 | 10.1263947 | 9.9862616  | 9.34357527 | 9.92405519 |
| 7.67196205 | 8.95771266 | 8.7109383  | 8.83523375 | 8.72374967 | 7.92670398 | 7.56871467 |
| 5.75029832 | 6.6275689  | 6.6535201  | 6.66976664 | 6.51211277 | 6.02252184 | 6.32749031 |
| 6.5533006  | 6.93802697 | 7.31604887 | 7.42208496 | 7.11544739 | 6.54464318 | 6.44160299 |
| 5.39128621 | 5.98701315 | 6.05597021 | 6.17272972 | 6.34445748 | 5.68746611 | 5.74312931 |
| 9.79817772 | 10.6024725 | 10.4988243 | 10.647149  | 10.6032424 | 9.60491641 | 8.78335483 |
| 7.94389086 | 8.73864828 | 8.72817971 | 8.57096264 | 8.78520461 | 7.70989163 | 7.77264119 |
| 9.2613973  | 9.46855725 | 9.94295209 | 10.1725138 | 10.6448522 | 9.04655381 | 7.7733021  |
| 5.75268973 | 6.50047591 | 6.77037582 | 5.6654789  | 5.89431722 | 6.38157981 | 6.246562   |
| 5.65309643 | 6.45957162 | 6.34712543 | 6.57810983 | 6.26812163 | 5.53332849 | 5.40016047 |
| 9.98956338 | 10.2644391 | 11.2428746 | 11.5485339 | 11.684451  | 10.2998502 | 10.4743428 |
| 8.46163415 | 9.54811059 | 9.2337359  | 9.03029276 | 8.66963343 | 8.04477551 | 8.172378   |
| 10.7639792 | 12.1835876 | 11.7599219 | 11.570184  | 11.7320847 | 10.9202382 | 10.7984426 |
| 5.87629887 | 6.03701052 | 6.24396358 | 6.26360705 | 5.81445173 | 5.76483604 | 5.96052399 |
| 5.40675774 | 5.97580808 | 6.1013181  | 6.12701806 | 5.95107112 | 5.9189858  | 5.79600248 |
| 13.2965033 | 14.1373114 | 13.9747901 | 13.9463352 | 14.2905978 | 12.9264135 | 13.564783  |
| 13.3735014 | 14.3185944 | 14.142044  | 13.9220501 | 14.267399  | 13.4575297 | 13.450041  |
| 8.97011855 | 9.64670468 | 10.1309592 | 10.0107309 | 10.0397471 | 9.87962766 | 9.27757684 |
| 5.68560718 | 6.57033951 | 6.33766347 | 6.15422471 | 6.19141499 | 5.79373855 | 5.90047342 |
| 7.0235703  | 7.65348428 | 8.15852335 | 7.97497435 | 8.21609589 | 7.33821937 | 6.57984524 |
| 6.29508179 | 6.75632681 | 6.97434231 | 7.14415959 | 7.07002431 | 6.69212586 | 6.35952223 |
| 7.04256664 | 8.08190201 | 7.77218523 | 7.77156936 | 7.90244506 | 6.87424737 | 6.48401516 |
| 5.48824409 | 6.03289891 | 6.24941216 | 6.17307005 | 6.12784723 | 5.70638744 | 5.47147005 |
| 12.0172883 | 12.6963503 | 12.8112021 | 12.7914645 | 12.4540476 | 11.4758464 | 11.6867286 |
| 8.84542858 | 10.6841122 | 9.59726727 | 9.29173454 | 8.80090119 | 8.0752882  | 8.27251782 |
| 9.33507208 | 10.3684792 | 10.1201562 | 10.2717361 | 10.1369168 | 8.34582302 | 8.57847761 |
| 7.60527282 | 8.50382614 | 8.58100959 | 8.51489273 | 8.35014758 | 7.50226058 | 7.57561412 |
| 7.29723636 | 7.92982058 | 8.19613587 | 8.29954919 | 8.26297852 | 7.19010418 | 6.45955523 |
| 6.57395993 | 7.2696812  | 7.30013013 | 7.26444917 | 6.89699592 | 6.3812877  | 6.60862771 |
| 7.09430153 | 7.67063501 | 7.74020171 | 7.53127852 | 7.1499696  | 6.58700052 | 7.19862478 |
| 7.5270805  | 9.25561309 | 9.17319441 | 8.95088129 | 8.2356098  | 7.78783924 | 7.50478007 |
| 6.1996537  | 7.36843924 | 7.35000654 | 7.07949438 | 6.89503597 | 5.66700791 | 6.34194466 |
| 7.85848274 | 7.70981308 | 8.21572373 | 7.97156195 | 7.96206774 | 6.7950409  | 6.59979445 |
| 8.45964309 | 9.18107024 | 9.51119938 | 9.44777258 | 9.60345814 | 8.8209869  | 8.47009226 |
| 11.1629187 | 11.9075982 | 11.8867685 | 11.8148248 | 12.4066188 | 10.9789778 | 10.1924321 |
| 11.685348  | 11.9359948 | 12.1363693 | 11.7777957 | 11.8408499 | 11.2305861 | 11.3558334 |
| 7.92043206 | 8.78035505 | 9.40676858 | 9.26129456 | 9.72364729 | 7.38767703 | 7.47315292 |
| 5.52417748 | 6.22851531 | 6.41013993 | 6.36190115 | 6.19285361 | 5.70716777 | 5.85030863 |
| 6.25401611 | 7.68017102 | 7.21008977 | 7.29913291 | 6.99043304 | 6.23953667 | 6.40577015 |
| 9.48513133 | 8.8120563  | 9.51710046 | 10.3046251 | 10.777229  | 9.73655617 | 8.55748361 |
| 8.07387003 | 8.0062565  | 8.76855322 | 8.37372215 | 7.88575371 | 7.27596617 | 7.50347913 |

|            |            |            |            |            |            |            |
|------------|------------|------------|------------|------------|------------|------------|
| 6.85018434 | 8.01429001 | 8.17722318 | 8.15650027 | 8.17128941 | 7.0448957  | 6.72053431 |
| 5.63225047 | 6.11869403 | 6.22182141 | 5.86577261 | 5.7506668  | 5.68539329 | 6.23069336 |
| 6.55737072 | 7.23256099 | 7.35073326 | 7.33535016 | 7.46807659 | 6.65145358 | 7.24825683 |
| 8.69229433 | 9.0291638  | 9.25406653 | 9.03836786 | 9.08954847 | 8.08314155 | 8.90085564 |
| 7.33309719 | 9.39376026 | 7.91225046 | 7.91575571 | 7.51087491 | 7.05807076 | 7.50675505 |
| 10.9214029 | 12.0222981 | 11.9188305 | 11.6886345 | 11.7088946 | 10.9177965 | 10.9554363 |
| 6.19444977 | 6.98546969 | 7.13778527 | 5.90442942 | 6.22012755 | 7.04792222 | 7.37308613 |
| 7.20579032 | 8.5634476  | 7.87911146 | 7.91711724 | 7.24716705 | 7.03457119 | 6.7446307  |
| 11.2214379 | 12.8467824 | 12.4753398 | 12.4044066 | 11.9207217 | 10.3326196 | 11.0664761 |
| 11.0861103 | 12.801263  | 12.5782404 | 12.2948984 | 12.555663  | 11.4986667 | 11.6585699 |
| 6.58335345 | 6.18219132 | 7.26488543 | 7.10394028 | 6.76232755 | 6.68825311 | 7.15376886 |
| 6.22354747 | 6.90638677 | 7.26492764 | 6.83671189 | 6.54579682 | 6.21275336 | 6.46477134 |
| 6.30773834 | 7.72791977 | 7.75694655 | 7.16780449 | 6.81361704 | 5.93298973 | 6.30468078 |
| 5.45724362 | 6.27418878 | 6.85303253 | 5.41463991 | 5.73554222 | 5.86225871 | 5.82256344 |
| 10.2091353 | 10.9605313 | 10.7166437 | 10.4340558 | 11.0627842 | 9.88404991 | 10.0272301 |
| 9.35715917 | 9.58162128 | 10.7953709 | 10.7075662 | 10.5115016 | 9.8997578  | 9.85010915 |
| 8.1822086  | 9.75180295 | 9.61087203 | 9.64327431 | 9.9380127  | 8.04383551 | 7.55237015 |
| 7.28813612 | 9.05310156 | 9.22135463 | 9.75059897 | 9.53340255 | 8.30853198 | 8.88743419 |
| 7.82283338 | 8.99474122 | 8.92845412 | 8.77009661 | 9.04562289 | 7.92311708 | 7.83772316 |
| 12.433654  | 13.2665722 | 13.1216758 | 12.7057898 | 13.1842876 | 11.9724568 | 12.3054396 |
| 6.39341208 | 6.74203721 | 6.87403461 | 7.00504623 | 6.94444385 | 6.23925864 | 6.0910073  |
| 5.80340142 | 6.76353109 | 6.56109163 | 6.53907225 | 6.61037614 | 5.77131488 | 5.60560041 |
| 6.31045592 | 6.60414666 | 6.60227292 | 6.37825306 | 7.21266174 | 5.91486729 | 6.1906115  |
| 5.58213385 | 6.45483144 | 6.41307427 | 6.08821009 | 6.0942196  | 6.01591231 | 6.197012   |
| 5.68186301 | 6.30699055 | 6.55331519 | 6.56603927 | 6.54691313 | 5.94189178 | 6.12517249 |
| 7.12202452 | 8.10906746 | 8.28718737 | 8.00721289 | 7.82023833 | 7.30638256 | 7.35913019 |
| 7.73534819 | 8.83088847 | 9.12323034 | 9.2519846  | 8.81714484 | 7.23939804 | 6.61587413 |
| 6.33396858 | 7.76888234 | 7.64070551 | 7.38110424 | 7.14955813 | 6.12725295 | 6.25099757 |
| 11.9590083 | 12.7619237 | 12.4809078 | 12.5677731 | 12.5551367 | 11.4142148 | 11.5705644 |
| 7.49357929 | 8.21871531 | 8.02375934 | 8.60418848 | 8.2173805  | 7.71693741 | 7.90655994 |
| 7.8589607  | 8.90612998 | 8.02237281 | 7.70715963 | 5.55713465 | 7.3184226  | 6.85558986 |
| 6.2605453  | 6.64487437 | 7.80477315 | 7.05281473 | 7.32822253 | 7.29539243 | 7.64381435 |
| 8.80009099 | 9.63364554 | 9.42907381 | 9.04912811 | 9.26310274 | 8.55200811 | 7.52527414 |
| 7.16525977 | 7.14730365 | 7.80127767 | 8.06557608 | 8.00799603 | 7.31728869 | 7.10101233 |
| 7.24611351 | 8.98339439 | 8.94190328 | 8.73196148 | 8.33623473 | 7.16392335 | 6.87024757 |
| 7.81573936 | 9.0876437  | 9.10316924 | 8.83366399 | 8.86999876 | 7.82964537 | 8.10663622 |
| 6.23736046 | 5.98527977 | 6.7196941  | 6.82687385 | 6.26265753 | 5.97576063 | 5.80895105 |
| 6.42692036 | 7.28050633 | 7.04298352 | 7.21112222 | 6.85356282 | 6.09210614 | 6.09465687 |
| 8.66378472 | 10.7157553 | 10.5483885 | 10.3480288 | 10.1577953 | 8.41979547 | 8.45184741 |
| 8.98175421 | 8.35849473 | 9.58620404 | 8.13113106 | 8.37249291 | 6.88794803 | 7.90956552 |
| 6.91586385 | 7.92504225 | 8.7016693  | 8.34058185 | 8.40704848 | 6.39130546 | 7.09817003 |
| 6.25378169 | 7.03094848 | 6.99755436 | 7.04301963 | 7.01034236 | 6.1792003  | 6.08075913 |
| 8.17797159 | 9.13553256 | 9.22443442 | 9.17732336 | 9.62716158 | 8.62802187 | 7.86109746 |
| 8.40917664 | 9.73991509 | 10.0868262 | 9.82154042 | 9.78217838 | 8.27861347 | 8.9164223  |
| 7.63822665 | 8.37802689 | 8.88537608 | 8.65997271 | 7.95519247 | 7.5058822  | 7.43414864 |
| 5.87267759 | 6.49133684 | 6.65597858 | 6.81517448 | 6.40608627 | 6.32481582 | 5.93302279 |
| 5.49771965 | 6.16578133 | 6.05961659 | 6.09073003 | 5.95705606 | 5.61138576 | 5.82089911 |
| 6.9968463  | 7.33795188 | 7.78813624 | 7.65978331 | 7.82983434 | 6.95157731 | 6.74239029 |

|            |            |            |            |            |            |            |
|------------|------------|------------|------------|------------|------------|------------|
| 7.48922821 | 8.0528533  | 8.1859146  | 8.15699115 | 7.72157294 | 7.50357136 | 7.35792055 |
| 10.2503813 | 11.8956181 | 11.0540019 | 11.0780487 | 10.4078912 | 10.3101288 | 10.3793762 |
| 5.49065965 | 5.85801632 | 5.97958525 | 6.00691129 | 5.67737801 | 5.68692963 | 5.51539802 |
| 9.3000553  | 9.82434002 | 10.0704913 | 9.77486842 | 10.3809956 | 9.12494843 | 9.40769477 |
| 6.89796038 | 8.06434668 | 7.74998538 | 7.85135428 | 8.31450258 | 7.38716606 | 6.98184695 |
| 6.41665551 | 8.18873521 | 8.14680896 | 6.75190954 | 6.94771407 | 6.1260587  | 6.59950898 |
| 6.86055813 | 7.57262065 | 7.5895021  | 7.83533925 | 8.20236336 | 6.97243189 | 6.61850693 |
| 5.53234533 | 6.51863726 | 6.57319848 | 6.53682969 | 6.28947153 | 5.70187809 | 5.7584948  |
| 7.9970592  | 8.9476121  | 9.13341916 | 9.07016362 | 9.02099688 | 7.80184737 | 7.34491014 |
| 5.72963189 | 6.06311568 | 6.37450658 | 7.9916851  | 5.88484258 | 5.80436855 | 6.05417363 |
| 7.86460156 | 8.7487071  | 8.85018871 | 9.09074098 | 8.39831745 | 7.86964072 | 7.07367566 |
| 6.14534283 | 7.16879545 | 7.05680135 | 7.06751396 | 6.68538796 | 6.21145187 | 6.50165713 |
| 5.85016508 | 7.3990805  | 6.85684256 | 7.42887769 | 8.43273439 | 6.39997034 | 6.52546866 |
| 7.0040103  | 7.94601787 | 7.49831789 | 7.02890062 | 7.0281304  | 6.73529877 | 6.90336973 |
| 11.2245022 | 12.398445  | 12.3135732 | 11.5370315 | 10.8583657 | 9.22710688 | 10.6641797 |
| 7.50228923 | 8.83567085 | 9.30355908 | 7.25864329 | 7.96195202 | 7.4173901  | 6.39493543 |
| 10.5479462 | 11.6767113 | 11.5644782 | 11.3932537 | 11.6856638 | 10.2211883 | 9.89248635 |
| 5.47683918 | 6.17791859 | 6.54218034 | 5.67016335 | 5.82907753 | 6.18712736 | 5.88740098 |
| 7.37037791 | 8.58210773 | 8.4412548  | 8.64003846 | 8.56082269 | 7.36010788 | 7.4915974  |
| 13.275034  | 14.1668127 | 13.9115933 | 13.3673956 | 13.3803961 | 12.7387674 | 13.0640116 |
| 6.75662971 | 7.75311644 | 8.35739761 | 8.49803141 | 8.66682546 | 7.29265661 | 7.36340064 |
| 11.7098562 | 13.0531553 | 12.7352338 | 12.3149675 | 12.2987222 | 11.2031479 | 11.9999172 |
| 9.16954374 | 9.47168578 | 9.84858679 | 9.15231907 | 9.286119   | 8.49714648 | 8.49635848 |
| 11.4074261 | 12.4762814 | 12.5874149 | 12.1311399 | 11.6737172 | 10.5053392 | 10.6551434 |
| 9.10102179 | 9.80804905 | 10.1278461 | 9.5106726  | 9.2291322  | 7.85090316 | 8.78336269 |
| 7.8761418  | 8.97296285 | 8.40028431 | 8.80392735 | 9.09027521 | 7.70465828 | 7.87937372 |
| 6.64988989 | 7.05600902 | 7.70407032 | 7.74982519 | 7.41185753 | 6.51957068 | 7.16474606 |
| 9.31008173 | 10.4729863 | 9.82362439 | 9.79148461 | 9.47020922 | 8.73116763 | 9.21135832 |
| 5.33442025 | 5.55980626 | 5.78452178 | 5.85739783 | 5.67120391 | 5.29359672 | 5.35388501 |
| 12.4357166 | 13.1338878 | 13.4188435 | 13.1599716 | 12.1388628 | 11.6730007 | 11.0766479 |
| 6.33038684 | 6.44247264 | 7.02050109 | 6.95335022 | 6.74977425 | 6.14061998 | 6.08980405 |
| 5.81544504 | 6.29654312 | 6.38557634 | 6.61427697 | 6.44981572 | 5.81501459 | 5.93445399 |
| 11.3951924 | 12.6060415 | 12.3976196 | 12.1560056 | 11.8468482 | 11.0343244 | 10.4875024 |
| 6.78826939 | 7.11057309 | 7.44201954 | 7.55344806 | 7.3203547  | 6.69627487 | 6.27143091 |
| 8.44826418 | 9.99295674 | 10.0989795 | 9.64935319 | 9.09085264 | 8.16191488 | 8.54102225 |
| 8.26859908 | 8.89041812 | 8.83332687 | 9.0110813  | 9.18191851 | 8.8850374  | 8.68425595 |
| 6.29799546 | 6.81761814 | 7.14075208 | 6.94633786 | 6.73797062 | 6.44464968 | 6.18491025 |
| 8.87310262 | 10.032842  | 9.79096503 | 10.0452327 | 9.43819345 | 8.93655432 | 8.69210214 |
| 6.25700156 | 7.16672448 | 7.2914553  | 7.17600156 | 7.22919086 | 6.40430829 | 6.36970866 |
| 12.4719858 | 13.4726997 | 12.924568  | 12.8021433 | 13.1069129 | 12.0634369 | 12.4504734 |
| 7.7280933  | 8.29820786 | 8.47059909 | 8.79335328 | 8.25248851 | 7.28229801 | 8.04090339 |
| 5.71483484 | 6.15537564 | 6.27664517 | 6.04408959 | 6.24495098 | 5.69852938 | 5.49688253 |
| 8.19905833 | 8.56150295 | 8.67250455 | 8.4799714  | 8.07939838 | 7.54411054 | 7.25939679 |
| 5.83123554 | 6.91111631 | 6.83058999 | 6.42481748 | 6.46027387 | 5.82631154 | 6.32106511 |
| 12.1286114 | 12.882358  | 12.9747385 | 12.2569676 | 12.230756  | 11.4682554 | 11.6306544 |
| 5.96482417 | 7.39267118 | 7.06009279 | 6.639121   | 6.82191553 | 6.01276799 | 6.50756252 |
| 7.04318372 | 8.81550594 | 8.6964192  | 8.58777639 | 8.40856879 | 6.97867958 | 7.08826353 |
| 7.34626462 | 8.26722912 | 8.39963938 | 7.99037801 | 8.04357691 | 7.00944795 | 6.87093552 |

|            |            |            |            |            |            |            |
|------------|------------|------------|------------|------------|------------|------------|
| 6.53234767 | 7.73626797 | 7.70442451 | 7.84298951 | 7.34301778 | 6.3751724  | 6.46604203 |
| 5.63644018 | 6.39318913 | 6.60288545 | 6.17561661 | 6.74845721 | 5.91937012 | 5.99800635 |
| 5.4912836  | 6.53899623 | 6.69585605 | 6.3499717  | 6.19292243 | 5.67871421 | 6.20649984 |
| 6.27403294 | 7.27586284 | 7.46824199 | 7.27939886 | 6.76251094 | 6.45488423 | 6.75670042 |
| 9.93007585 | 11.1320916 | 10.8472477 | 10.5981623 | 10.3498175 | 9.37421704 | 9.61660269 |
| 8.47462302 | 8.65086004 | 8.63267392 | 8.99214867 | 8.49650749 | 7.96944984 | 8.2128441  |
| 11.3627603 | 12.2579644 | 11.9186199 | 11.576653  | 12.1180381 | 10.9638967 | 11.4420198 |
| 7.7286287  | 8.26180628 | 8.2275346  | 8.36517722 | 8.31514684 | 8.03788734 | 7.7330933  |
| 6.0761687  | 7.38984125 | 7.85523478 | 7.79703633 | 7.00954873 | 6.79694032 | 7.03550625 |
| 7.37987651 | 8.19334301 | 9.10280744 | 8.40429475 | 8.93134533 | 7.39918562 | 8.44402056 |
| 6.84058408 | 7.53835813 | 7.63115522 | 7.65868992 | 7.78848996 | 7.39364787 | 7.10359625 |
| 11.2159873 | 11.9483318 | 11.7070882 | 11.3194158 | 12.0971644 | 10.8872686 | 10.9727673 |
| 5.87068627 | 6.20888124 | 6.74459034 | 6.24620835 | 6.23612233 | 6.05341071 | 6.06061661 |
| 12.9708799 | 13.7604923 | 13.4898191 | 13.323871  | 13.7332505 | 12.3744475 | 13.1299672 |
| 6.31961956 | 6.48109014 | 6.9867727  | 6.99398564 | 6.98268904 | 6.2312955  | 6.37167612 |
| 9.10490718 | 10.069435  | 9.83587024 | 9.58589526 | 10.1437327 | 8.74414125 | 8.78685933 |
| 8.06114434 | 9.00136175 | 8.91256963 | 8.88343265 | 9.11146722 | 8.08738752 | 7.18373263 |
| 5.78773413 | 6.18178656 | 6.03744394 | 6.44282211 | 6.01151375 | 5.86635215 | 5.93357028 |
| 7.26548753 | 8.1250275  | 8.7015643  | 8.10916464 | 8.19066424 | 6.67140519 | 8.08509637 |
| 5.33794332 | 6.0364985  | 6.2968918  | 5.89467979 | 6.33880839 | 5.71806484 | 5.75649494 |
| 6.46846863 | 7.83461579 | 7.48808113 | 7.16666223 | 6.98207635 | 5.99762301 | 6.82971766 |
| 5.21142422 | 5.99704215 | 5.89771237 | 6.04171522 | 5.91018291 | 5.5151157  | 5.76255771 |
| 5.38511658 | 6.14488355 | 6.1591165  | 6.24441255 | 5.98831226 | 5.99159463 | 5.78718508 |
| 5.65730873 | 6.46178997 | 6.32503556 | 6.06394595 | 6.3193486  | 5.94436724 | 6.06540515 |
| 5.42655394 | 6.46860906 | 6.48180605 | 6.24612207 | 6.14139968 | 5.70567772 | 5.88266603 |
| 5.21752117 | 5.6835446  | 5.85460039 | 5.75092829 | 5.65450657 | 5.60218308 | 5.42818495 |
| 5.99585283 | 6.64818355 | 6.83680276 | 6.58166097 | 6.2631287  | 5.79125381 | 6.17409937 |
| 6.80446406 | 7.93060725 | 7.94293201 | 7.35513787 | 7.78145086 | 6.41525721 | 7.22613567 |
| 5.53541318 | 6.30088826 | 6.27910816 | 5.96897753 | 6.33913293 | 5.6692998  | 6.13224574 |
| 5.75660409 | 6.94410177 | 7.19326513 | 7.04010009 | 6.70292484 | 5.75158583 | 6.10809556 |
| 5.18138963 | 5.79713104 | 6.02431835 | 5.87141393 | 5.65358774 | 5.48069102 | 5.62563901 |
| 5.62239129 | 6.00615819 | 6.22707332 | 5.96853594 | 5.83705339 | 5.72518873 | 5.84691749 |
| 6.03098973 | 7.06185503 | 6.89738203 | 6.7050144  | 6.90290205 | 6.26222398 | 6.40654347 |
| 5.32317981 | 5.82297279 | 5.86421339 | 5.77723901 | 5.7496965  | 5.61301737 | 5.56821638 |
| 6.44664084 | 7.72043512 | 7.77554707 | 7.30887687 | 7.28722016 | 6.29297403 | 6.77191594 |
| 5.59655773 | 6.66828651 | 6.44867915 | 6.29367819 | 6.23881934 | 5.53871787 | 5.74515879 |
| 6.19511547 | 7.44634888 | 7.50264885 | 7.09386754 | 7.25398832 | 6.03014668 | 6.87667656 |
| 5.72020595 | 6.31610337 | 6.46224983 | 6.16307882 | 6.53715704 | 5.76971753 | 6.01044687 |
| 5.47884823 | 5.90797437 | 6.12868005 | 6.1996537  | 5.84277297 | 5.73446305 | 5.73339366 |
| 7.15009861 | 7.79174506 | 8.17808168 | 7.96583507 | 7.6090073  | 6.56692229 | 6.72099799 |
| 6.70968765 | 7.8246024  | 7.35044774 | 7.27210159 | 6.534063   | 5.67221911 | 6.1669526  |
| 6.17642431 | 7.29976758 | 7.17392593 | 6.90531118 | 7.00100503 | 6.00919218 | 6.82684589 |
| 6.78001213 | 7.16021431 | 7.56895326 | 7.36293271 | 6.93964033 | 6.14971461 | 6.94535604 |
| 5.48257856 | 6.28417022 | 6.47653415 | 6.16150439 | 6.19894375 | 5.70045137 | 5.9715224  |
| 5.02010345 | 5.46591147 | 5.73358646 | 5.52527524 | 5.53284026 | 5.37666893 | 5.45501119 |
| 5.55025549 | 6.38796199 | 6.4285796  | 6.52832595 | 6.40295457 | 5.87383214 | 6.19552379 |
| 5.30445482 | 5.46123681 | 5.62142305 | 5.75460214 | 5.50616681 | 5.35323859 | 6.07824476 |
| 6.05708999 | 7.92121911 | 6.71220507 | 6.4850434  | 6.05149348 | 5.86952451 | 6.24746103 |

|            |            |            |            |            |            |            |
|------------|------------|------------|------------|------------|------------|------------|
| 5.13620246 | 6.47301423 | 5.96882827 | 5.82408987 | 5.87578301 | 5.26771594 | 5.48226199 |
| 5.87907813 | 6.46637148 | 6.45722047 | 6.44084974 | 6.28336732 | 5.83005246 | 5.81585846 |
| 5.86727429 | 6.36463826 | 6.42888004 | 6.23049298 | 6.62721241 | 6.11615887 | 6.14564913 |
| 5.56798101 | 6.0509733  | 6.15421944 | 6.08737925 | 6.11077268 | 5.39193815 | 5.45818348 |
| 5.96534841 | 6.61609579 | 6.66651802 | 6.6422282  | 6.86072076 | 6.25432986 | 6.07823494 |
| 6.84531692 | 8.26787799 | 8.10084838 | 7.57222272 | 6.55093529 | 5.98701337 | 6.54846452 |
| 7.32259699 | 8.82259824 | 8.72058014 | 8.58538661 | 8.37934414 | 7.02637626 | 7.39457845 |
| 6.28058353 | 7.70651605 | 7.74650156 | 7.66732802 | 7.16110265 | 6.78900929 | 6.48501215 |
| 5.2162263  | 5.69029305 | 5.94759837 | 5.75721824 | 5.72182213 | 5.68648932 | 5.58187032 |
| 6.50262769 | 6.64227326 | 7.48953491 | 7.56366762 | 7.39216885 | 6.19410301 | 6.62881631 |
| 5.44372267 | 6.55150787 | 6.55438502 | 6.64485563 | 6.25683329 | 5.68480107 | 5.74442512 |
| 6.03050581 | 7.34987212 | 6.98353292 | 6.69002871 | 6.5485758  | 5.60518584 | 6.55299133 |
| 7.11956576 | 8.37369562 | 8.77267219 | 8.33394783 | 8.0898122  | 6.86048488 | 8.27280845 |
| 5.39419445 | 6.05591795 | 6.10644736 | 6.04704362 | 6.02444668 | 5.65036018 | 5.83091141 |
| 5.78317715 | 7.01804213 | 7.24490323 | 6.86162045 | 6.53959838 | 5.94382336 | 6.23325901 |
| 6.28576044 | 7.37488994 | 6.55344929 | 6.98042409 | 6.36008505 | 5.79484809 | 6.5545511  |
| 5.33498617 | 6.02473455 | 6.2586497  | 5.95925409 | 5.92404334 | 5.55036171 | 5.67647814 |
| 5.98488893 | 6.91360632 | 7.10266758 | 6.36200622 | 6.29731231 | 5.78613499 | 6.24033837 |
| 5.40742958 | 6.18587447 | 6.30281327 | 6.28598787 | 6.13313831 | 5.64233623 | 5.7288443  |
| 5.08810131 | 5.67927008 | 5.72534472 | 5.64662754 | 5.61556696 | 5.23792886 | 5.34020511 |
| 5.15506957 | 5.73611939 | 5.85757027 | 5.82025888 | 5.61273347 | 5.46756414 | 5.55561219 |
| 6.35550545 | 6.95465348 | 7.26267463 | 6.94505751 | 6.62762668 | 5.93676324 | 6.15910075 |
| 5.27569842 | 5.56514962 | 6.07392432 | 5.74528063 | 5.53207192 | 5.28628384 | 5.39419445 |
| 5.61027603 | 6.50250899 | 6.54300413 | 6.28810843 | 5.95612056 | 5.61252914 | 6.30086685 |
| 5.14650453 | 5.98759214 | 6.11233316 | 5.96626364 | 5.70222201 | 5.48022052 | 5.41536353 |
| 5.03411885 | 5.84224599 | 5.68208389 | 5.4602357  | 5.6979567  | 5.51461465 | 5.28542478 |
| 6.2651081  | 7.09019501 | 7.67450161 | 7.24919406 | 7.50496275 | 6.2968274  | 6.16824709 |
| 5.44723369 | 6.68127215 | 6.64222936 | 6.16907937 | 6.58471271 | 5.62619205 | 6.20372445 |
| 5.26815102 | 6.22246977 | 6.34776362 | 6.64928349 | 5.88157041 | 5.84318994 | 5.82921989 |
| 5.77791307 | 7.31675488 | 7.38762534 | 7.3964772  | 7.18244997 | 6.04878307 | 6.46411098 |
| 5.96721288 | 7.16333368 | 7.16210528 | 6.84662745 | 6.52048825 | 5.93033191 | 6.44709629 |
| 5.81777443 | 6.31534686 | 6.32943938 | 6.25778477 | 6.34725904 | 5.82781496 | 6.31123916 |
| 7.45917175 | 8.38284879 | 8.57727133 | 8.45751919 | 8.0911365  | 7.73203511 | 7.23148905 |
| 5.79874991 | 6.95776953 | 6.51562999 | 5.95386399 | 5.91772294 | 5.55910539 | 5.86826969 |
| 6.26590267 | 6.86993555 | 6.8828411  | 6.70809341 | 6.73875028 | 6.27949024 | 6.61321293 |
| 5.51287665 | 6.45228161 | 6.86284933 | 6.24605763 | 6.1016423  | 5.58283777 | 5.74890235 |
| 5.59833662 | 6.73978736 | 6.62344083 | 6.41703864 | 5.8323546  | 5.55631721 | 5.83318131 |
| 7.60219704 | 9.27946178 | 9.03151402 | 9.02994423 | 8.72317046 | 7.44847812 | 7.26699825 |
| 6.65277472 | 7.98291887 | 7.21431621 | 7.38385719 | 6.86332399 | 6.06497056 | 6.12711384 |
| 6.75751002 | 6.67658477 | 6.62552051 | 6.83966361 | 6.17665089 | 6.19766    | 5.95070915 |
| 5.37281492 | 6.00622306 | 6.03430465 | 6.13663355 | 5.67982602 | 5.53794302 | 5.73553626 |
| 5.54337803 | 6.99391207 | 7.06486884 | 6.40849721 | 6.32533658 | 5.53982106 | 5.72435887 |
| 12.118375  | 12.2734815 | 12.6659734 | 12.1092917 | 11.7503059 | 11.6055573 | 11.8265548 |

| <b>C194_NS</b> | <b>C005_NS</b> | <b>C053_NS</b> | <b>Species</b> | <b>Source</b> | <b>Search_Key</b> | <b>Transcript</b> |
|----------------|----------------|----------------|----------------|---------------|-------------------|-------------------|
| 13.2013326     | 13.7033272     | 13.6871515     | Homo sapiens   | RefSeq        | ILMN_35460        | ILMN_35460        |
| 6.97829861     | 8.45249907     | 7.96239401     | Homo sapiens   | RefSeq        | ILMN_33714        | ILMN_33714        |
| 6.88444773     | 7.57270098     | 7.59455676     | Homo sapiens   | RefSeq        | ILMN_35526        | ILMN_35526        |
| 6.23306818     | 8.60294192     | 7.73543485     | Homo sapiens   | RefSeq        | ILMN_39212        | ILMN_39212        |
| 7.14543189     | 7.30868305     | 7.14318217     | Homo sapiens   | RefSeq        | ILMN_36365        | ILMN_36365        |
| 6.57540885     | 8.0743422      | 9.0137146      | Homo sapiens   | RefSeq        | ILMN_36463        | ILMN_36463        |
| 5.95923577     | 7.54389486     | 7.70063461     | Homo sapiens   | RefSeq        | ILMN_33930        | ILMN_33930        |
| 5.9235457      | 6.58003978     | 6.1876773      | Homo sapiens   | RefSeq        | ILMN_35501        | ILMN_35501        |
| 6.67471063     | 7.97035039     | 7.75828319     | Homo sapiens   | RefSeq        | ILMN_45221        | ILMN_45221        |
| 6.5657245      | 6.76916079     | 6.68868672     | Homo sapiens   | RefSeq        | ILMN_37061        | ILMN_37061        |
| 6.73432485     | 7.43161878     | 7.65849428     | Homo sapiens   | RefSeq        | ILMN_35497        | ILMN_35497        |
| 7.35896234     | 8.36038623     | 8.59716837     | Homo sapiens   | RefSeq        | ILMN_34363        | ILMN_165204       |
| 6.1359961      | 7.64765053     | 7.63820709     | Homo sapiens   | RefSeq        | ILMN_25861        | ILMN_25861        |
| 7.05584964     | 7.85984162     | 8.14142666     | Homo sapiens   | Unigene       | ILMN_123613       | ILMN_123613       |
| 6.3678297      | 7.66356807     | 8.88187657     | Homo sapiens   | Unigene       | ILMN_85632        | ILMN_85632        |
| 6.51350527     | 7.90703486     | 8.30621256     | Homo sapiens   | Unigene       | ILMN_102473       | ILMN_102473       |
| 7.87907469     | 7.46649498     | 7.67458282     | Homo sapiens   | Unigene       | ILMN_95916        | ILMN_95916        |
| 7.92989868     | 8.36866666     | 7.95208657     | Homo sapiens   | Unigene       | ILMN_110121       | ILMN_110121       |
| 5.3985662      | 5.79797817     | 5.65262875     | Homo sapiens   | Unigene       | ILMN_84001        | ILMN_84001        |
| 6.0979828      | 6.67077095     | 6.98592389     | Homo sapiens   | Unigene       | ILMN_122060       | ILMN_122060       |
| 6.54328104     | 7.40899881     | 5.92728043     | Homo sapiens   | Unigene       | ILMN_71317        | ILMN_71317        |
| 5.42073603     | 6.15489627     | 6.23717649     | Homo sapiens   | Unigene       | ILMN_115289       | ILMN_115289       |
| 7.45722244     | 9.00949834     | 9.1704241      | Homo sapiens   | Unigene       | ILMN_92999        | ILMN_92999        |
| 11.4964983     | 12.6740022     | 13.0815563     | Homo sapiens   | ILMN_Controls |                   | ILMN_160456       |
| 10.5280106     | 10.8605183     | 10.800142      | Homo sapiens   | RefSeq        | ILMN_992          | ILMN_992          |
| 5.51158126     | 5.88647211     | 6.21320378     | Homo sapiens   | RefSeq        | ILMN_4884         | ILMN_4884         |
| 13.3059392     | 13.7497385     | 13.5994631     | Homo sapiens   | RefSeq        | ILMN_3511         | ILMN_3511         |
| 7.2764064      | 7.68685976     | 8.97319309     | Homo sapiens   | RefSeq        | ILMN_438          | ILMN_438          |
| 5.83829454     | 7.58847029     | 7.82470231     | Homo sapiens   | RefSeq        | ILMN_32918        | ILMN_34149        |
| 8.21161725     | 10.1118803     | 9.62201008     | Homo sapiens   | RefSeq        | ILMN_6684         | ILMN_6684         |
| 13.0516547     | 13.8317842     | 13.5107234     | Homo sapiens   | RefSeq        | ILMN_37525        | ILMN_32190        |
| 12.3905514     | 13.0685128     | 13.1960162     | Homo sapiens   | RefSeq        | ILMN_12810        | ILMN_12810        |
| 5.67178278     | 6.36101612     | 6.3061957      | Homo sapiens   | RefSeq        | ILMN_4020         | ILMN_181875       |
| 7.18610532     | 8.3874724      | 8.84073985     | Homo sapiens   | RefSeq        | ILMN_21452        | ILMN_170581       |
| 5.09489645     | 5.29867628     | 5.29161719     | Homo sapiens   | RefSeq        | ILMN_16049        | ILMN_32013        |
| 11.0318783     | 13.3454704     | 13.3168133     | Homo sapiens   | RefSeq        | ILMN_21166        | ILMN_170702       |
| 8.63973177     | 9.66964672     | 9.89129827     | Homo sapiens   | RefSeq        | ILMN_30796        | ILMN_30796        |
| 9.01371767     | 9.5108668      | 10.3206844     | Homo sapiens   | RefSeq        | ILMN_9004         | ILMN_9004         |
| 5.96335667     | 6.16245196     | 6.50413412     | Homo sapiens   | RefSeq        | ILMN_24167        | ILMN_180500       |
| 6.37378844     | 7.05222024     | 7.17981855     | Homo sapiens   | RefSeq        | ILMN_1648         | ILMN_10378        |
| 8.5529457      | 9.71155066     | 9.85661103     | Homo sapiens   | RefSeq        | ILMN_16610        | ILMN_176850       |
| 7.52773815     | 8.60823375     | 8.77688041     | Homo sapiens   | RefSeq        | ILMN_24367        | ILMN_162780       |
| 6.44250896     | 6.99449261     | 6.79123323     | Homo sapiens   | RefSeq        | ILMN_4217         | ILMN_4217         |
| 6.95903982     | 7.93297592     | 8.57604098     | Homo sapiens   | RefSeq        | ILMN_13023        | ILMN_13023        |
| 5.8965901      | 6.24850144     | 6.88804547     | Homo sapiens   | RefSeq        | ILMN_19660        | ILMN_182039       |
| 7.85970374     | 9.70263642     | 9.3846467      | Homo sapiens   | RefSeq        | ILMN_13156        | ILMN_13156        |
| 6.95603225     | 8.0978025      | 7.74167394     | Homo sapiens   | RefSeq        | ILMN_37703        | ILMN_181618       |

|            |            |            |              |        |             |             |
|------------|------------|------------|--------------|--------|-------------|-------------|
| 6.61777849 | 7.56945843 | 7.6978711  | Homo sapiens | RefSeq | ILMN_39093  | ILMN_39093  |
| 7.26726986 | 6.64124327 | 6.25442114 | Homo sapiens | RefSeq | ILMN_42161  | ILMN_176099 |
| 9.87266534 | 11.3347962 | 10.6744942 | Homo sapiens | RefSeq | ILMN_26733  | ILMN_26733  |
| 9.36158613 | 11.1143488 | 11.1275823 | Homo sapiens | RefSeq | ILMN_8122   | ILMN_8122   |
| 6.75068957 | 7.89519112 | 7.46219468 | Homo sapiens | RefSeq | ILMN_30967  | ILMN_30967  |
| 6.37035123 | 6.95239298 | 6.77246238 | Homo sapiens | RefSeq | ILMN_138909 | ILMN_138909 |
| 13.5013521 | 13.5853663 | 13.610184  | Homo sapiens | RefSeq | ILMN_33193  | ILMN_5932   |
| 6.15300251 | 7.08614366 | 8.03709664 | Homo sapiens | RefSeq | ILMN_2573   | ILMN_2573   |
| 5.78283523 | 6.03536218 | 5.85858978 | Homo sapiens | RefSeq | ILMN_45580  | ILMN_45580  |
| 8.74124315 | 10.257211  | 9.68798938 | Homo sapiens | RefSeq | ILMN_137685 | ILMN_7619   |
| 5.64326254 | 5.87505337 | 6.67053162 | Homo sapiens | RefSeq | ILMN_31490  | ILMN_31490  |
| 6.83528492 | 7.96934853 | 8.01523551 | Homo sapiens | RefSeq | ILMN_15612  | ILMN_15612  |
| 8.592966   | 10.2916968 | 10.1755982 | Homo sapiens | RefSeq | ILMN_23821  | ILMN_23821  |
| 6.99648366 | 8.66379646 | 8.71873356 | Homo sapiens | RefSeq | ILMN_931    | ILMN_931    |
| 6.56549969 | 8.09396205 | 7.76350254 | Homo sapiens | RefSeq | ILMN_19186  | ILMN_19186  |
| 9.33957079 | 10.0513232 | 10.7808096 | Homo sapiens | RefSeq | ILMN_28738  | ILMN_28738  |
| 6.58819187 | 7.52174097 | 8.37849342 | Homo sapiens | RefSeq | ILMN_12534  | ILMN_12534  |
| 5.55153417 | 6.70577337 | 7.04582845 | Homo sapiens | RefSeq | ILMN_9310   | ILMN_9310   |
| 6.15589654 | 7.45540285 | 7.39284889 | Homo sapiens | RefSeq | ILMN_18159  | ILMN_168272 |
| 8.81185728 | 10.2973462 | 9.78694115 | Homo sapiens | RefSeq | ILMN_9157   | ILMN_9157   |
| 6.05853254 | 6.72349167 | 6.99254413 | Homo sapiens | RefSeq | ILMN_23073  | ILMN_40991  |
| 11.0395456 | 12.1974824 | 12.0420383 | Homo sapiens | RefSeq | ILMN_22938  | ILMN_22938  |
| 6.98046293 | 8.57382401 | 9.06376986 | Homo sapiens | RefSeq | ILMN_674    | ILMN_5512   |
| 8.38907502 | 8.91145341 | 9.17598685 | Homo sapiens | RefSeq | ILMN_3697   | ILMN_3697   |
| 7.89018522 | 9.91679713 | 9.2526801  | Homo sapiens | RefSeq | ILMN_12451  | ILMN_12451  |
| 8.22729055 | 8.60421851 | 8.81140424 | Homo sapiens | RefSeq | ILMN_1064   | ILMN_1064   |
| 6.1801789  | 7.3295802  | 7.69447699 | Homo sapiens | RefSeq | ILMN_9667   | ILMN_9667   |
| 7.1827638  | 9.20315832 | 8.78699978 | Homo sapiens | RefSeq | ILMN_11812  | ILMN_11812  |
| 8.59293723 | 9.3848185  | 9.7848007  | Homo sapiens | RefSeq | ILMN_11650  | ILMN_167824 |
| 5.78694497 | 6.88704998 | 6.19907257 | Homo sapiens | RefSeq | ILMN_434    | ILMN_168083 |
| 8.07353589 | 8.23368151 | 8.75077163 | Homo sapiens | RefSeq | ILMN_23233  | ILMN_23233  |
| 7.33198999 | 8.82990536 | 8.62192842 | Homo sapiens | RefSeq | ILMN_18271  | ILMN_16784  |
| 8.24156708 | 9.72827224 | 10.5393769 | Homo sapiens | RefSeq | ILMN_23042  | ILMN_23042  |
| 6.37162316 | 6.66353533 | 6.85711512 | Homo sapiens | RefSeq | ILMN_42138  | ILMN_167196 |
| 8.39300082 | 9.19053264 | 9.33043314 | Homo sapiens | RefSeq | ILMN_29466  | ILMN_29466  |
| 5.93021787 | 5.86614416 | 5.64084243 | Homo sapiens | RefSeq | ILMN_42457  | ILMN_42457  |
| 6.41053446 | 7.89942218 | 7.41171011 | Homo sapiens | RefSeq | ILMN_18158  | ILMN_18158  |
| 7.07867708 | 7.40920677 | 7.53448498 | Homo sapiens | RefSeq | ILMN_3430   | ILMN_3430   |
| 12.058417  | 13.8808577 | 13.803895  | Homo sapiens | RefSeq | ILMN_4451   | ILMN_4451   |
| 9.98269274 | 10.6068308 | 10.5793716 | Homo sapiens | RefSeq | ILMN_18757  | ILMN_18757  |
| 6.65818577 | 7.71403666 | 5.50190914 | Homo sapiens | RefSeq | ILMN_18302  | ILMN_18302  |
| 7.02886195 | 9.60633451 | 9.14318217 | Homo sapiens | RefSeq | ILMN_16228  | ILMN_16228  |
| 6.54405998 | 7.33254773 | 7.05249306 | Homo sapiens | RefSeq | ILMN_6400   | ILMN_169896 |
| 8.25275767 | 9.40656877 | 10.7748859 | Homo sapiens | RefSeq | ILMN_13735  | ILMN_13735  |
| 6.58032792 | 8.5692769  | 8.31318371 | Homo sapiens | RefSeq | ILMN_1026   | ILMN_1026   |
| 5.71885587 | 7.1485437  | 7.68414758 | Homo sapiens | RefSeq | ILMN_4100   | ILMN_4100   |
| 8.05628113 | 9.50236502 | 9.42255743 | Homo sapiens | RefSeq | ILMN_26470  | ILMN_176188 |
| 5.6157944  | 6.56173044 | 6.55717647 | Homo sapiens | RefSeq | ILMN_34866  | ILMN_34866  |

|            |            |            |              |        |             |             |
|------------|------------|------------|--------------|--------|-------------|-------------|
| 7.33669043 | 7.4510454  | 8.30412677 | Homo sapiens | RefSeq | ILMN_28428  | ILMN_28428  |
| 7.19393433 | 8.86731118 | 9.22375292 | Homo sapiens | RefSeq | ILMN_12219  | ILMN_12219  |
| 7.74845385 | 8.05346382 | 7.27347673 | Homo sapiens | RefSeq | ILMN_18016  | ILMN_18016  |
| 8.54523209 | 9.37628257 | 9.80419557 | Homo sapiens | RefSeq | ILMN_12074  | ILMN_182200 |
| 11.1098953 | 13.1593089 | 13.0591104 | Homo sapiens | RefSeq | ILMN_546    | ILMN_546    |
| 5.9543208  | 6.23234955 | 6.02375835 | Homo sapiens | RefSeq | ILMN_46756  | ILMN_46756  |
| 7.9089966  | 8.89306607 | 9.05350455 | Homo sapiens | RefSeq | ILMN_13904  | ILMN_13904  |
| 5.89176742 | 6.27076327 | 5.98060985 | Homo sapiens | RefSeq | ILMN_3397   | ILMN_180235 |
| 7.53171675 | 10.4684387 | 11.0236885 | Homo sapiens | RefSeq | ILMN_30135  | ILMN_183098 |
| 8.61368524 | 11.7623218 | 10.4859621 | Homo sapiens | RefSeq | ILMN_43918  | ILMN_166057 |
| 6.61669792 | 8.77562378 | 9.03705325 | Homo sapiens | RefSeq | ILMN_29986  | ILMN_176524 |
| 10.5027175 | 11.3410089 | 11.5803401 | Homo sapiens | RefSeq | ILMN_21668  | ILMN_21668  |
| 10.7587046 | 11.6819385 | 11.9170069 | Homo sapiens | RefSeq | ILMN_7361   | ILMN_7361   |
| 6.24310999 | 6.61516378 | 6.63826604 | Homo sapiens | RefSeq | ILMN_9777   | ILMN_9777   |
| 5.94785758 | 7.51115964 | 7.68777318 | Homo sapiens | RefSeq | ILMN_18165  | ILMN_18523  |
| 8.05025843 | 9.89837132 | 9.7578245  | Homo sapiens | RefSeq | ILMN_21987  | ILMN_21987  |
| 5.60015853 | 5.71188416 | 5.9010095  | Homo sapiens | RefSeq | ILMN_3184   | ILMN_177243 |
| 12.4208276 | 13.977457  | 14.0092469 | Homo sapiens | RefSeq | ILMN_16565  | ILMN_24337  |
| 5.99186646 | 5.68470431 | 6.23732834 | Homo sapiens | RefSeq | ILMN_23096  | ILMN_23096  |
| 9.82680618 | 10.7189994 | 11.500086  | Homo sapiens | RefSeq | ILMN_33374  | ILMN_33374  |
| 9.31364697 | 10.8623468 | 11.1564326 | Homo sapiens | RefSeq | ILMN_24018  | ILMN_172961 |
| 10.7675265 | 12.0209515 | 12.5856924 | Homo sapiens | RefSeq | ILMN_16294  | ILMN_16294  |
| 6.59180222 | 6.96934277 | 7.85902595 | Homo sapiens | RefSeq | ILMN_24835  | ILMN_24835  |
| 7.10042371 | 8.70478345 | 7.97697017 | Homo sapiens | RefSeq | ILMN_30669  | ILMN_30669  |
| 6.06640483 | 6.60293398 | 6.71551179 | Homo sapiens | RefSeq | ILMN_17938  | ILMN_17938  |
| 9.82125611 | 11.3611976 | 11.2427835 | Homo sapiens | RefSeq | ILMN_19052  | ILMN_19052  |
| 9.61553916 | 11.4276104 | 11.3679694 | Homo sapiens | RefSeq | ILMN_6282   | ILMN_28535  |
| 7.46506352 | 8.4672807  | 8.60188405 | Homo sapiens | RefSeq | ILMN_7500   | ILMN_7500   |
| 7.32361596 | 9.99077054 | 9.74347474 | Homo sapiens | RefSeq | ILMN_12195  | ILMN_178116 |
| 9.60201159 | 11.7378735 | 11.1299115 | Homo sapiens | RefSeq | ILMN_2086   | ILMN_2086   |
| 5.88305819 | 7.03134336 | 6.61285258 | Homo sapiens | RefSeq | ILMN_4671   | ILMN_174333 |
| 7.61796108 | 8.50700808 | 9.06970915 | Homo sapiens | RefSeq | ILMN_26236  | ILMN_26236  |
| 9.19515637 | 12.5211138 | 12.6482079 | Homo sapiens | RefSeq | ILMN_12367  | ILMN_172296 |
| 6.44297119 | 7.52554508 | 7.23128743 | Homo sapiens | RefSeq | ILMN_16615  | ILMN_16615  |
| 6.43213146 | 8.35778906 | 8.5791726  | Homo sapiens | RefSeq | ILMN_17968  | ILMN_174251 |
| 11.9098938 | 12.5487097 | 12.7231366 | Homo sapiens | RefSeq | ILMN_27890  | ILMN_163725 |
| 6.04132688 | 8.52091721 | 8.25175317 | Homo sapiens | RefSeq | ILMN_4882   | ILMN_182705 |
| 7.14457362 | 7.89796401 | 8.25343482 | Homo sapiens | RefSeq | ILMN_17467  | ILMN_167454 |
| 10.9945387 | 12.6764523 | 12.2374203 | Homo sapiens | RefSeq | ILMN_11399  | ILMN_11399  |
| 6.71827531 | 8.21878407 | 7.71209361 | Homo sapiens | RefSeq | ILMN_25109  | ILMN_25109  |
| 5.86776355 | 7.00953977 | 6.86171969 | Homo sapiens | RefSeq | ILMN_18271  | ILMN_18271  |
| 5.89955149 | 7.16759176 | 6.85556868 | Homo sapiens | RefSeq | ILMN_24867  | ILMN_24867  |
| 10.3311409 | 11.5159974 | 11.0492462 | Homo sapiens | RefSeq | ILMN_9411   | ILMN_9411   |
| 13.4888494 | 14.4166432 | 14.0007448 | Homo sapiens | RefSeq | ILMN_34885  | ILMN_33374  |
| 7.41048527 | 8.40576947 | 8.43172825 | Homo sapiens | RefSeq | ILMN_137656 | ILMN_137656 |
| 10.161603  | 10.4182701 | 11.6562872 | Homo sapiens | RefSeq | ILMN_19677  | ILMN_19677  |
| 6.0518058  | 6.76850856 | 6.74656269 | Homo sapiens | RefSeq | ILMN_27829  | ILMN_27829  |
| 6.28464331 | 6.95589513 | 7.13727809 | Homo sapiens | RefSeq | ILMN_11654  | ILMN_11654  |



|            |            |            |              |        |             |             |
|------------|------------|------------|--------------|--------|-------------|-------------|
| 6.62917562 | 6.99823274 | 6.81139268 | Homo sapiens | RefSeq | ILMN_21696  | ILMN_21696  |
| 8.31725341 | 9.08678244 | 9.29944158 | Homo sapiens | RefSeq | ILMN_6355   | ILMN_6355   |
| 10.2961993 | 12.812851  | 11.5107879 | Homo sapiens | RefSeq | ILMN_11054  | ILMN_11054  |
| 13.2987113 | 14.1669766 | 14.0217573 | Homo sapiens | RefSeq | ILMN_137940 | ILMN_162123 |
| 8.5334006  | 10.0293397 | 10.2024275 | Homo sapiens | RefSeq | ILMN_24538  | ILMN_24538  |
| 6.66568838 | 8.2883198  | 7.73010394 | Homo sapiens | RefSeq | ILMN_30799  | ILMN_30799  |
| 5.84348243 | 6.27153642 | 7.00152192 | Homo sapiens | RefSeq | ILMN_18742  | ILMN_18742  |
| 10.5140867 | 12.0814958 | 12.1282    | Homo sapiens | RefSeq | ILMN_20742  | ILMN_183744 |
| 9.63242673 | 10.4244991 | 10.974454  | Homo sapiens | RefSeq | ILMN_13829  | ILMN_13829  |
| 6.43115575 | 6.5544719  | 7.10233479 | Homo sapiens | RefSeq | ILMN_8242   | ILMN_8242   |
| 9.95980521 | 11.5640085 | 11.7285864 | Homo sapiens | RefSeq | ILMN_25184  | ILMN_25184  |
| 7.29108872 | 8.45378711 | 8.6613887  | Homo sapiens | RefSeq | ILMN_17355  | ILMN_17355  |
| 8.59174224 | 9.16846278 | 9.4800114  | Homo sapiens | RefSeq | ILMN_12918  | ILMN_12918  |
| 5.94053795 | 5.92179168 | 6.30909595 | Homo sapiens | RefSeq | ILMN_11187  | ILMN_11187  |
| 13.7644507 | 14.2664381 | 13.9947565 | Homo sapiens | RefSeq | ILMN_15031  | ILMN_15150  |
| 6.54745106 | 7.71437879 | 7.96813281 | Homo sapiens | RefSeq | ILMN_41055  | ILMN_41055  |
| 6.49966893 | 7.24510581 | 7.51384838 | Homo sapiens | RefSeq | ILMN_30159  | ILMN_30159  |
| 6.16120164 | 7.76669189 | 7.87278691 | Homo sapiens | RefSeq | ILMN_24062  | ILMN_24062  |
| 7.6159768  | 10.0048763 | 9.60981645 | Homo sapiens | RefSeq | ILMN_40016  | ILMN_183964 |
| 5.77211554 | 5.90277594 | 6.46223641 | Homo sapiens | RefSeq | ILMN_21688  | ILMN_21688  |
| 10.0907635 | 11.8546791 | 12.1563928 | Homo sapiens | RefSeq | ILMN_22627  | ILMN_22627  |
| 8.77262733 | 9.70064813 | 9.85619922 | Homo sapiens | RefSeq | ILMN_26395  | ILMN_26395  |
| 6.92745088 | 8.20719934 | 7.74136519 | Homo sapiens | RefSeq | ILMN_14046  | ILMN_14046  |
| 6.08213776 | 6.77149079 | 6.72222146 | Homo sapiens | RefSeq | ILMN_25402  | ILMN_25402  |
| 6.04755562 | 6.51673206 | 6.31353901 | Homo sapiens | RefSeq | ILMN_44907  | ILMN_44907  |
| 6.83848541 | 6.75807794 | 7.20646936 | Homo sapiens | RefSeq | ILMN_15994  | ILMN_15181  |
| 13.6547289 | 14.622816  | 14.6640189 | Homo sapiens | RefSeq | ILMN_35496  | ILMN_177367 |
| 5.76119377 | 6.39055454 | 6.0976799  | Homo sapiens | RefSeq | ILMN_1751   | ILMN_1751   |
| 6.43122162 | 6.90784607 | 6.97013236 | Homo sapiens | RefSeq | ILMN_30583  | ILMN_30583  |
| 5.67033843 | 6.1823584  | 5.74994101 | Homo sapiens | RefSeq | ILMN_15769  | ILMN_183654 |
| 12.3451726 | 13.073193  | 13.2527543 | Homo sapiens | RefSeq | ILMN_32160  | ILMN_174488 |
| 8.1885033  | 8.52416361 | 9.06119728 | Homo sapiens | RefSeq | ILMN_3417   | ILMN_3417   |
| 5.9899907  | 8.49095514 | 9.00098391 | Homo sapiens | RefSeq | ILMN_138567 | ILMN_31250  |
| 6.08181063 | 7.26917438 | 5.80481896 | Homo sapiens | RefSeq | ILMN_15744  | ILMN_15744  |
| 5.86357179 | 6.09396638 | 5.95579728 | Homo sapiens | RefSeq | ILMN_1531   | ILMN_1531   |
| 10.2864861 | 12.5287586 | 12.4803199 | Homo sapiens | RefSeq | ILMN_8851   | ILMN_8851   |
| 7.92595967 | 8.81944881 | 8.55818305 | Homo sapiens | RefSeq | ILMN_19305  | ILMN_19305  |
| 8.79318743 | 9.82913317 | 10.0279253 | Homo sapiens | RefSeq | ILMN_12279  | ILMN_12279  |
| 8.05654343 | 10.3114872 | 10.5697531 | Homo sapiens | RefSeq | ILMN_31523  | ILMN_31523  |
| 5.76318102 | 6.07136153 | 6.17545514 | Homo sapiens | RefSeq | ILMN_15938  | ILMN_15938  |
| 6.1393422  | 6.48752429 | 6.47511164 | Homo sapiens | RefSeq | ILMN_24447  | ILMN_24447  |
| 7.72865455 | 7.27269883 | 6.4778269  | Homo sapiens | RefSeq | ILMN_42231  | ILMN_176099 |
| 8.55487966 | 10.9623444 | 10.5746966 | Homo sapiens | RefSeq | ILMN_20636  | ILMN_168435 |
| 6.33627714 | 7.49249495 | 7.80071939 | Homo sapiens | RefSeq | ILMN_15535  | ILMN_15535  |
| 7.85899736 | 9.37486799 | 9.02749358 | Homo sapiens | RefSeq | ILMN_22340  | ILMN_22340  |
| 7.44936741 | 8.69201459 | 8.51930758 | Homo sapiens | RefSeq | ILMN_995    | ILMN_995    |
| 6.82117446 | 7.23306358 | 7.6858869  | Homo sapiens | RefSeq | ILMN_9404   | ILMN_182113 |
| 5.54807868 | 5.8915424  | 5.92268358 | Homo sapiens | RefSeq | ILMN_34248  | ILMN_34248  |

|            |            |            |              |        |             |             |
|------------|------------|------------|--------------|--------|-------------|-------------|
| 6.1939903  | 6.8981382  | 6.91484074 | Homo sapiens | RefSeq | ILMN_42592  | ILMN_42592  |
| 11.1713676 | 13.1413659 | 13.2033448 | Homo sapiens | RefSeq | ILMN_26119  | ILMN_26119  |
| 9.68366154 | 10.6716269 | 10.9023118 | Homo sapiens | RefSeq | ILMN_42664  | ILMN_42664  |
| 13.2587677 | 14.2716636 | 14.2069304 | Homo sapiens | RefSeq | ILMN_37216  | ILMN_37216  |
| 10.9224692 | 12.9381742 | 13.2282947 | Homo sapiens | RefSeq | ILMN_29191  | ILMN_29191  |
| 8.21526215 | 10.7422008 | 10.3238226 | Homo sapiens | RefSeq | ILMN_36201  | ILMN_36201  |
| 11.5818102 | 12.7677903 | 12.9685854 | Homo sapiens | RefSeq | ILMN_17455  | ILMN_17455  |
| 6.22960311 | 8.41023679 | 8.0308194  | Homo sapiens | RefSeq | ILMN_14893  | ILMN_171466 |
| 6.53664152 | 6.95810374 | 6.81283319 | Homo sapiens | RefSeq | ILMN_40864  | ILMN_43403  |
| 8.18971191 | 8.57455152 | 8.96336285 | Homo sapiens | RefSeq | ILMN_26249  | ILMN_26249  |
| 7.7919612  | 9.12730104 | 9.08543528 | Homo sapiens | RefSeq | ILMN_12388  | ILMN_178719 |
| 12.1973015 | 13.3677697 | 13.6779211 | Homo sapiens | RefSeq | ILMN_13161  | ILMN_13161  |
| 8.56675238 | 9.85024061 | 10.026226  | Homo sapiens | RefSeq | ILMN_6379   | ILMN_6379   |
| 6.2196274  | 6.33709664 | 7.55480294 | Homo sapiens | RefSeq | ILMN_139245 | ILMN_162831 |
| 7.78687599 | 7.61825775 | 9.09785647 | Homo sapiens | RefSeq | ILMN_1388   | ILMN_1388   |
| 6.13249767 | 7.65115576 | 7.78868375 | Homo sapiens | RefSeq | ILMN_3109   | ILMN_172627 |
| 12.793107  | 13.8746539 | 13.9223029 | Homo sapiens | RefSeq | ILMN_25646  | ILMN_25646  |
| 5.61021105 | 5.74475366 | 5.79724208 | Homo sapiens | RefSeq | ILMN_33035  | ILMN_33035  |
| 7.62880129 | 8.38505953 | 8.40343944 | Homo sapiens | RefSeq | ILMN_2433   | ILMN_162668 |
| 8.33250924 | 8.72076651 | 9.25371845 | Homo sapiens | RefSeq | ILMN_29405  | ILMN_29405  |
| 5.76909704 | 6.46949644 | 6.35823044 | Homo sapiens | RefSeq | ILMN_25839  | ILMN_38096  |
| 6.0564177  | 9.62960925 | 5.97930629 | Homo sapiens | RefSeq | ILMN_3298   | ILMN_3298   |
| 7.15526452 | 8.96222163 | 9.02775675 | Homo sapiens | RefSeq | ILMN_27136  | ILMN_27136  |
| 6.30553156 | 7.49203663 | 7.89883172 | Homo sapiens | RefSeq | ILMN_10110  | ILMN_177429 |
| 6.30448385 | 7.15897114 | 7.26752082 | Homo sapiens | RefSeq | ILMN_769    | ILMN_769    |
| 10.1019678 | 11.8365999 | 12.1586564 | Homo sapiens | RefSeq | ILMN_6780   | ILMN_6780   |
| 9.96064854 | 11.2012822 | 10.7853642 | Homo sapiens | RefSeq | ILMN_137685 | ILMN_137685 |
| 9.00824764 | 10.9315568 | 10.662599  | Homo sapiens | RefSeq | ILMN_25069  | ILMN_25069  |
| 7.56343044 | 9.00873786 | 8.7370543  | Homo sapiens | RefSeq | ILMN_15990  | ILMN_167378 |
| 7.01142743 | 7.88518448 | 7.48701356 | Homo sapiens | RefSeq | ILMN_14182  | ILMN_14182  |
| 10.4197959 | 12.4262207 | 12.248676  | Homo sapiens | RefSeq | ILMN_12219  | ILMN_183064 |
| 5.54509668 | 6.2865598  | 5.88588791 | Homo sapiens | RefSeq | ILMN_34579  | ILMN_172509 |
| 9.15095665 | 10.7765548 | 10.6961225 | Homo sapiens | RefSeq | ILMN_4224   | ILMN_168866 |
| 8.11911491 | 8.68143416 | 8.87682111 | Homo sapiens | RefSeq | ILMN_5706   | ILMN_164962 |
| 6.62459575 | 7.56498933 | 7.56059039 | Homo sapiens | RefSeq | ILMN_3279   | ILMN_3279   |
| 6.09956916 | 6.80518281 | 6.77417032 | Homo sapiens | RefSeq | ILMN_18423  | ILMN_171627 |
| 8.73148128 | 9.1761916  | 9.44255375 | Homo sapiens | RefSeq | ILMN_1770   | ILMN_1770   |
| 9.37080988 | 11.8023504 | 11.5807009 | Homo sapiens | RefSeq | ILMN_25195  | ILMN_25195  |
| 13.5248514 | 14.675817  | 14.5569562 | Homo sapiens | RefSeq | ILMN_19648  | ILMN_19648  |
| 9.92613496 | 11.4941826 | 11.3737232 | Homo sapiens | RefSeq | ILMN_25641  | ILMN_178109 |
| 5.93495377 | 6.67644091 | 6.58753602 | Homo sapiens | RefSeq | ILMN_23234  | ILMN_23234  |
| 9.20518477 | 10.0784404 | 9.80408487 | Homo sapiens | RefSeq | ILMN_901    | ILMN_901    |
| 6.46632889 | 7.32717087 | 7.24311208 | Homo sapiens | RefSeq | ILMN_28103  | ILMN_28103  |
| 12.982615  | 14.165795  | 13.9227693 | Homo sapiens | RefSeq | ILMN_8741   | ILMN_8741   |
| 8.55960538 | 9.11777866 | 10.0122865 | Homo sapiens | RefSeq | ILMN_19827  | ILMN_19827  |
| 9.71594844 | 10.4448234 | 10.1652826 | Homo sapiens | RefSeq | ILMN_19124  | ILMN_168791 |
| 6.06711766 | 6.38765515 | 6.14283042 | Homo sapiens | RefSeq | ILMN_778    | ILMN_7072   |
| 9.64763471 | 10.7615562 | 10.9435573 | Homo sapiens | RefSeq | ILMN_22886  | ILMN_22886  |

|            |            |            |              |        |             |             |
|------------|------------|------------|--------------|--------|-------------|-------------|
| 6.57090293 | 6.58751411 | 7.32557171 | Homo sapiens | RefSeq | ILMN_6505   | ILMN_6505   |
| 14.2421685 | 14.7880326 | 14.5089405 | Homo sapiens | RefSeq | ILMN_13072  | ILMN_13072  |
| 10.3017728 | 10.7551213 | 13.4331029 | Homo sapiens | RefSeq | ILMN_2381   | ILMN_183928 |
| 10.837512  | 11.651415  | 11.6826865 | Homo sapiens | RefSeq | ILMN_7263   | ILMN_7263   |
| 8.59380492 | 9.19428876 | 10.1202029 | Homo sapiens | RefSeq | ILMN_4868   | ILMN_4868   |
| 6.80256031 | 9.14200313 | 8.85498523 | Homo sapiens | RefSeq | ILMN_24216  | ILMN_169443 |
| 6.75530689 | 7.18166612 | 7.3755078  | Homo sapiens | RefSeq | ILMN_23294  | ILMN_176692 |
| 10.1476883 | 12.1618184 | 11.9097731 | Homo sapiens | RefSeq | ILMN_139337 | ILMN_10538  |
| 6.14605112 | 7.27352148 | 7.39784146 | Homo sapiens | RefSeq | ILMN_16361  | ILMN_16361  |
| 5.95162276 | 6.78227095 | 6.48853108 | Homo sapiens | RefSeq | ILMN_570    | ILMN_570    |
| 5.88328038 | 5.5029123  | 5.83596221 | Homo sapiens | RefSeq | ILMN_32065  | ILMN_32065  |
| 6.49442793 | 7.2409859  | 7.29403069 | Homo sapiens | RefSeq | ILMN_29403  | ILMN_29403  |
| 12.0424754 | 13.3828374 | 13.4280631 | Homo sapiens | RefSeq | ILMN_17961  | ILMN_17961  |
| 7.55427726 | 8.86560863 | 8.46877146 | Homo sapiens | RefSeq | ILMN_6966   | ILMN_178207 |
| 7.24234336 | 8.57458672 | 9.04636173 | Homo sapiens | RefSeq | ILMN_39734  | ILMN_39734  |
| 8.50458147 | 10.4850464 | 10.3690466 | Homo sapiens | RefSeq | ILMN_2794   | ILMN_2794   |
| 10.7177535 | 12.0170172 | 11.9036959 | Homo sapiens | RefSeq | ILMN_20221  | ILMN_20221  |
| 6.35945071 | 7.0560925  | 8.60265099 | Homo sapiens | RefSeq | ILMN_17425  | ILMN_17425  |
| 8.38449238 | 10.3903818 | 10.0666557 | Homo sapiens | RefSeq | ILMN_7707   | ILMN_7707   |
| 5.9269179  | 6.51159944 | 6.46227502 | Homo sapiens | RefSeq | ILMN_12259  | ILMN_12259  |
| 13.0120403 | 14.1587051 | 13.9141347 | Homo sapiens | RefSeq | ILMN_15150  | ILMN_15150  |
| 7.95791866 | 8.76156985 | 8.78357746 | Homo sapiens | RefSeq | ILMN_15131  | ILMN_15131  |
| 5.69030618 | 6.09537191 | 6.25772462 | Homo sapiens | RefSeq | ILMN_46214  | ILMN_46214  |
| 6.9372561  | 7.78065656 | 7.54643458 | Homo sapiens | RefSeq | ILMN_3191   | ILMN_3191   |
| 11.5763955 | 12.4517564 | 12.215681  | Homo sapiens | RefSeq | ILMN_40380  | ILMN_40380  |
| 8.40402134 | 8.97032969 | 8.93731967 | Homo sapiens | RefSeq | ILMN_21163  | ILMN_21163  |
| 5.6136339  | 7.29236489 | 6.42858814 | Homo sapiens | RefSeq | ILMN_14457  | ILMN_14457  |
| 6.02208768 | 7.46381207 | 5.45146698 | Homo sapiens | RefSeq | ILMN_29309  | ILMN_163189 |
| 6.70744196 | 8.27952051 | 8.26543971 | Homo sapiens | RefSeq | ILMN_6014   | ILMN_6014   |
| 8.03060645 | 9.18869738 | 8.78722969 | Homo sapiens | RefSeq | ILMN_30338  | ILMN_30338  |
| 7.9868     | 9.02375796 | 9.16607895 | Homo sapiens | RefSeq | ILMN_22111  | ILMN_22111  |
| 5.93378435 | 6.6165434  | 7.25534871 | Homo sapiens | RefSeq | ILMN_6021   | ILMN_6021   |
| 8.90378998 | 8.97479027 | 8.9581664  | Homo sapiens | RefSeq | ILMN_3784   | ILMN_3784   |
| 6.99708462 | 8.02234673 | 7.88361104 | Homo sapiens | RefSeq | ILMN_1253   | ILMN_1253   |
| 6.54171585 | 8.11854817 | 8.04760927 | Homo sapiens | RefSeq | ILMN_23658  | ILMN_23658  |
| 6.30006953 | 7.09994949 | 7.01231055 | Homo sapiens | RefSeq | ILMN_46774  | ILMN_46774  |
| 5.87725223 | 6.17410436 | 6.11412086 | Homo sapiens | RefSeq | ILMN_137381 | ILMN_38635  |
| 5.79650016 | 6.62280402 | 6.79205233 | Homo sapiens | RefSeq | ILMN_8921   | ILMN_8921   |
| 8.92376721 | 10.6045847 | 10.0430437 | Homo sapiens | RefSeq | ILMN_24358  | ILMN_24358  |
| 8.48724716 | 10.9535199 | 11.5308399 | Homo sapiens | RefSeq | ILMN_17672  | ILMN_167369 |
| 5.6278531  | 6.57237569 | 6.59659201 | Homo sapiens | RefSeq | ILMN_38817  | ILMN_38817  |
| 5.93189647 | 6.198281   | 5.98902726 | Homo sapiens | RefSeq | ILMN_27791  | ILMN_179289 |
| 6.92195159 | 7.64988702 | 8.06009441 | Homo sapiens | RefSeq | ILMN_7648   | ILMN_7648   |
| 5.95765811 | 6.34953725 | 6.5548413  | Homo sapiens | RefSeq | ILMN_22044  | ILMN_22044  |
| 5.49342766 | 6.23688366 | 6.13759287 | Homo sapiens | RefSeq | ILMN_22616  | ILMN_22616  |
| 11.0269847 | 12.956042  | 13.0088409 | Homo sapiens | RefSeq | ILMN_33107  | ILMN_168984 |
| 7.21766598 | 9.48784767 | 10.3110296 | Homo sapiens | RefSeq | ILMN_19255  | ILMN_19255  |
| 8.32153536 | 9.3093447  | 9.25412513 | Homo sapiens | RefSeq | ILMN_29038  | ILMN_180494 |

|            |            |            |              |        |             |             |
|------------|------------|------------|--------------|--------|-------------|-------------|
| 8.96101986 | 9.75210613 | 9.36159007 | Homo sapiens | RefSeq | ILMN_5061   | ILMN_7619   |
| 11.0026765 | 11.5203997 | 11.5176153 | Homo sapiens | RefSeq | ILMN_35801  | ILMN_175200 |
| 5.64942002 | 6.83187977 | 7.00571886 | Homo sapiens | RefSeq | ILMN_29296  | ILMN_29296  |
| 8.44302682 | 9.36500592 | 9.41632697 | Homo sapiens | RefSeq | ILMN_25681  | ILMN_25681  |
| 6.98561314 | 8.00183658 | 8.05792135 | Homo sapiens | RefSeq | ILMN_12744  | ILMN_12744  |
| 5.95315021 | 6.21523768 | 6.14981336 | Homo sapiens | RefSeq | ILMN_39876  | ILMN_166286 |
| 6.12541574 | 6.81140938 | 7.17537589 | Homo sapiens | RefSeq | ILMN_8732   | ILMN_8732   |
| 10.0400225 | 9.7400509  | 9.81702201 | Homo sapiens | RefSeq | ILMN_14838  | ILMN_14838  |
| 8.01899296 | 9.03954174 | 8.72948344 | Homo sapiens | RefSeq | ILMN_18313  | ILMN_18313  |
| 6.09599191 | 6.94797117 | 7.06461344 | Homo sapiens | RefSeq | ILMN_26138  | ILMN_167082 |
| 6.76006789 | 7.7188219  | 7.35081987 | Homo sapiens | RefSeq | ILMN_21751  | ILMN_180252 |
| 5.76923751 | 6.02265189 | 6.12495752 | Homo sapiens | RefSeq | ILMN_17623  | ILMN_17623  |
| 8.47676686 | 10.8707315 | 11.3102742 | Homo sapiens | RefSeq | ILMN_21130  | ILMN_21130  |
| 7.57315106 | 8.70655645 | 8.36261629 | Homo sapiens | RefSeq | ILMN_10077  | ILMN_164547 |
| 7.21764272 | 8.6855926  | 9.07121269 | Homo sapiens | RefSeq | ILMN_137528 | ILMN_8866   |
| 6.07901024 | 6.3479643  | 5.56099216 | Homo sapiens | RefSeq | ILMN_15605  | ILMN_182614 |
| 5.38512935 | 6.18662832 | 5.91761339 | Homo sapiens | RefSeq | ILMN_46634  | ILMN_46634  |
| 9.95551188 | 12.0431644 | 12.468247  | Homo sapiens | RefSeq | ILMN_18627  | ILMN_171368 |
| 8.13106622 | 9.00161114 | 9.97848024 | Homo sapiens | RefSeq | ILMN_11407  | ILMN_175392 |
| 11.1021614 | 12.5996077 | 12.5414788 | Homo sapiens | RefSeq | ILMN_25325  | ILMN_25325  |
| 6.36764731 | 6.20693894 | 5.99035248 | Homo sapiens | RefSeq | ILMN_437    | ILMN_437    |
| 5.82785941 | 5.95699312 | 6.05287601 | Homo sapiens | RefSeq | ILMN_21456  | ILMN_169410 |
| 13.5092851 | 14.4748708 | 14.3844728 | Homo sapiens | RefSeq | ILMN_46346  | ILMN_46346  |
| 13.4394245 | 14.643027  | 14.654947  | Homo sapiens | RefSeq | ILMN_2142   | ILMN_2142   |
| 8.2980039  | 8.68549029 | 8.34397182 | Homo sapiens | RefSeq | ILMN_19998  | ILMN_19998  |
| 5.99122341 | 6.5985385  | 6.73979006 | Homo sapiens | RefSeq | ILMN_1700   | ILMN_1700   |
| 6.46612085 | 7.30875585 | 7.74677227 | Homo sapiens | RefSeq | ILMN_11669  | ILMN_11669  |
| 6.22151772 | 7.21461929 | 7.42242056 | Homo sapiens | RefSeq | ILMN_13531  | ILMN_13531  |
| 6.2956604  | 7.98996267 | 8.44860862 | Homo sapiens | RefSeq | ILMN_16330  | ILMN_166425 |
| 5.56227021 | 6.30518003 | 6.29290559 | Homo sapiens | RefSeq | ILMN_24057  | ILMN_24057  |
| 11.8699813 | 12.9003919 | 12.4969084 | Homo sapiens | RefSeq | ILMN_26505  | ILMN_171578 |
| 8.84721116 | 11.2552659 | 11.982512  | Homo sapiens | RefSeq | ILMN_14503  | ILMN_167991 |
| 9.62021433 | 9.56831756 | 9.85754237 | Homo sapiens | RefSeq | ILMN_20088  | ILMN_20088  |
| 7.81539226 | 8.74146294 | 8.94530219 | Homo sapiens | RefSeq | ILMN_32712  | ILMN_172960 |
| 6.53120349 | 9.28045738 | 8.62018463 | Homo sapiens | RefSeq | ILMN_19556  | ILMN_169784 |
| 6.62139828 | 7.74380778 | 7.52863773 | Homo sapiens | RefSeq | ILMN_13107  | ILMN_180143 |
| 7.37876997 | 7.30868305 | 7.34594452 | Homo sapiens | RefSeq | ILMN_7503   | ILMN_7503   |
| 8.07671033 | 9.50236422 | 8.91722258 | Homo sapiens | RefSeq | ILMN_138771 | ILMN_19611  |
| 6.04097635 | 7.03143159 | 7.14677129 | Homo sapiens | RefSeq | ILMN_20446  | ILMN_20446  |
| 6.75323146 | 7.78938366 | 7.89534262 | Homo sapiens | RefSeq | ILMN_29106  | ILMN_29106  |
| 8.29410101 | 10.1075218 | 9.44421297 | Homo sapiens | RefSeq | ILMN_18687  | ILMN_18687  |
| 10.2460624 | 12.4535235 | 12.4617368 | Homo sapiens | RefSeq | ILMN_13489  | ILMN_13489  |
| 10.7959349 | 12.1979391 | 12.3174474 | Homo sapiens | RefSeq | ILMN_19743  | ILMN_19743  |
| 7.13342173 | 9.83039399 | 9.48174112 | Homo sapiens | RefSeq | ILMN_11925  | ILMN_177943 |
| 5.76584473 | 6.25230892 | 6.11438285 | Homo sapiens | RefSeq | ILMN_11712  | ILMN_11712  |
| 6.41815267 | 7.29062069 | 7.09738957 | Homo sapiens | RefSeq | ILMN_138991 | ILMN_37228  |
| 8.16088642 | 8.82519413 | 10.2302703 | Homo sapiens | RefSeq | ILMN_45021  | ILMN_33467  |
| 7.73565485 | 8.08031869 | 8.19426685 | Homo sapiens | RefSeq | ILMN_26226  | ILMN_181539 |

|            |            |            |              |        |             |             |
|------------|------------|------------|--------------|--------|-------------|-------------|
| 7.06142736 | 8.14313522 | 7.83448116 | Homo sapiens | RefSeq | ILMN_6262   | ILMN_162583 |
| 5.75865203 | 6.03328996 | 6.0759463  | Homo sapiens | RefSeq | ILMN_31151  | ILMN_31151  |
| 6.9382305  | 8.01859913 | 7.69660524 | Homo sapiens | RefSeq | ILMN_30967  | ILMN_30967  |
| 8.70941334 | 9.44059285 | 9.44480308 | Homo sapiens | RefSeq | ILMN_13488  | ILMN_13488  |
| 7.53931626 | 8.9702293  | 9.90079935 | Homo sapiens | RefSeq | ILMN_136933 | ILMN_41474  |
| 11.1240547 | 12.2940538 | 12.5155589 | Homo sapiens | RefSeq | ILMN_699    | ILMN_699    |
| 7.04636882 | 7.78460213 | 5.62112849 | Homo sapiens | RefSeq | ILMN_139242 | ILMN_183214 |
| 6.96005871 | 8.70822449 | 8.8796978  | Homo sapiens | RefSeq | ILMN_23642  | ILMN_23642  |
| 11.0369717 | 12.1935916 | 12.2577585 | Homo sapiens | RefSeq | ILMN_22327  | ILMN_22327  |
| 11.4270603 | 13.168473  | 13.4538545 | Homo sapiens | RefSeq | ILMN_6745   | ILMN_6745   |
| 6.69023549 | 5.9461502  | 6.2678294  | Homo sapiens | RefSeq | ILMN_14042  | ILMN_174401 |
| 6.43645671 | 7.14917298 | 7.28892789 | Homo sapiens | RefSeq | ILMN_20343  | ILMN_20343  |
| 6.29701364 | 8.58293266 | 8.52114342 | Homo sapiens | RefSeq | ILMN_20608  | ILMN_20608  |
| 5.58327807 | 6.66979923 | 5.28791254 | Homo sapiens | RefSeq | ILMN_3531   | ILMN_173170 |
| 9.52166953 | 10.4823734 | 10.5189452 | Homo sapiens | RefSeq | ILMN_46177  | ILMN_46177  |
| 9.56922258 | 10.4720044 | 10.2040918 | Homo sapiens | RefSeq | ILMN_30057  | ILMN_30057  |
| 7.75190017 | 10.3067863 | 10.1628294 | Homo sapiens | RefSeq | ILMN_137748 | ILMN_21291  |
| 8.06294845 | 10.3625324 | 9.53251568 | Homo sapiens | RefSeq | ILMN_29455  | ILMN_166212 |
| 7.70486367 | 8.81663522 | 8.91854337 | Homo sapiens | RefSeq | ILMN_136990 | ILMN_136990 |
| 12.0504544 | 13.0323437 | 13.0402443 | Homo sapiens | RefSeq | ILMN_9174   | ILMN_167736 |
| 6.03287952 | 6.5922836  | 6.63119889 | Homo sapiens | RefSeq | ILMN_23418  | ILMN_183042 |
| 5.67898063 | 6.83787766 | 7.13795634 | Homo sapiens | RefSeq | ILMN_29669  | ILMN_162233 |
| 5.8207549  | 6.54840087 | 7.15078508 | Homo sapiens | RefSeq | ILMN_28694  | ILMN_28694  |
| 5.92300985 | 6.61684404 | 6.94555855 | Homo sapiens | RefSeq | ILMN_42790  | ILMN_42790  |
| 5.96193165 | 6.46999421 | 6.37085093 | Homo sapiens | RefSeq | ILMN_33488  | ILMN_33488  |
| 7.13067352 | 8.88304585 | 8.56274461 | Homo sapiens | RefSeq | ILMN_11223  | ILMN_11223  |
| 6.90098029 | 9.45707856 | 8.89485565 | Homo sapiens | RefSeq | ILMN_29847  | ILMN_29956  |
| 6.15554889 | 7.57958446 | 7.98556418 | Homo sapiens | RefSeq | ILMN_138041 | ILMN_168110 |
| 11.7431232 | 13.3141173 | 13.2551272 | Homo sapiens | RefSeq | ILMN_30243  | ILMN_30243  |
| 7.90877749 | 8.94070091 | 8.91868587 | Homo sapiens | RefSeq | ILMN_24567  | ILMN_165486 |
| 5.25637213 | 5.39097922 | 8.26576599 | Homo sapiens | RefSeq | ILMN_6666   | ILMN_9927   |
| 6.3092828  | 6.72366914 | 6.62704734 | Homo sapiens | RefSeq | ILMN_16752  | ILMN_16752  |
| 7.5650297  | 9.23892225 | 9.85247099 | Homo sapiens | RefSeq | ILMN_20363  | ILMN_20363  |
| 6.93477949 | 7.93649425 | 7.50017584 | Homo sapiens | RefSeq | ILMN_14733  | ILMN_14733  |
| 7.11240927 | 8.99939885 | 8.81952322 | Homo sapiens | RefSeq | ILMN_32472  | ILMN_32472  |
| 8.14599887 | 9.12760439 | 10.3136914 | Homo sapiens | RefSeq | ILMN_9232   | ILMN_9232   |
| 5.95244703 | 6.99944874 | 6.8910169  | Homo sapiens | RefSeq | ILMN_10766  | ILMN_170754 |
| 6.21862426 | 7.5804327  | 7.83903557 | Homo sapiens | RefSeq | ILMN_16789  | ILMN_16789  |
| 8.49188556 | 10.6694529 | 10.4149484 | Homo sapiens | RefSeq | ILMN_3851   | ILMN_3851   |
| 7.52220409 | 8.19462587 | 8.3831971  | Homo sapiens | RefSeq | ILMN_10351  | ILMN_10351  |
| 7.82937835 | 7.78850301 | 8.58415752 | Homo sapiens | RefSeq | ILMN_21404  | ILMN_176421 |
| 6.0490792  | 6.81061148 | 6.86708843 | Homo sapiens | RefSeq | ILMN_947    | ILMN_947    |
| 7.65415983 | 8.80725284 | 9.29973737 | Homo sapiens | RefSeq | ILMN_3908   | ILMN_3908   |
| 8.37827535 | 10.1799079 | 10.0714262 | Homo sapiens | RefSeq | ILMN_1690   | ILMN_1690   |
| 7.77788717 | 8.73785979 | 8.97293701 | Homo sapiens | RefSeq | ILMN_17166  | ILMN_17166  |
| 6.13921448 | 6.47609568 | 6.53681105 | Homo sapiens | RefSeq | ILMN_12799  | ILMN_165929 |
| 5.69856216 | 6.32748366 | 6.13773548 | Homo sapiens | RefSeq | ILMN_18612  | ILMN_18612  |
| 6.55731374 | 7.82732619 | 7.74494683 | Homo sapiens | RefSeq | ILMN_5095   | ILMN_5095   |

|            |            |            |              |        |             |             |
|------------|------------|------------|--------------|--------|-------------|-------------|
| 7.47660041 | 8.14213004 | 8.23969972 | Homo sapiens | RefSeq | ILMN_11642  | ILMN_11642  |
| 10.7630605 | 12.1658523 | 11.8868626 | Homo sapiens | RefSeq | ILMN_7921   | ILMN_7921   |
| 5.44263967 | 6.12051244 | 6.18417177 | Homo sapiens | RefSeq | ILMN_44054  | ILMN_44054  |
| 10.1432454 | 10.3250952 | 11.4883292 | Homo sapiens | RefSeq | ILMN_4432   | ILMN_182487 |
| 6.80479573 | 8.72604067 | 8.88727607 | Homo sapiens | RefSeq | ILMN_28389  | ILMN_28389  |
| 6.56522595 | 7.74302951 | 7.93079883 | Homo sapiens | RefSeq | ILMN_2176   | ILMN_179020 |
| 6.46414595 | 7.97471228 | 7.69234699 | Homo sapiens | RefSeq | ILMN_8616   | ILMN_174337 |
| 5.80468424 | 6.53196388 | 6.21979407 | Homo sapiens | RefSeq | ILMN_10243  | ILMN_18648  |
| 7.19850103 | 9.39704865 | 9.59090175 | Homo sapiens | RefSeq | ILMN_138444 | ILMN_175751 |
| 6.02377586 | 6.44020575 | 6.33897539 | Homo sapiens | RefSeq | ILMN_40991  | ILMN_40991  |
| 6.79444446 | 8.85689857 | 8.77211626 | Homo sapiens | RefSeq | ILMN_19298  | ILMN_19298  |
| 6.28937488 | 7.11488233 | 6.84492164 | Homo sapiens | RefSeq | ILMN_17030  | ILMN_17030  |
| 6.56295138 | 6.6553733  | 6.78352737 | Homo sapiens | RefSeq | ILMN_7286   | ILMN_174352 |
| 7.40320039 | 8.1761926  | 8.44276356 | Homo sapiens | RefSeq | ILMN_16356  | ILMN_16356  |
| 11.5678387 | 12.1511488 | 12.6771296 | Homo sapiens | RefSeq | ILMN_28136  | ILMN_166624 |
| 7.40315266 | 9.13887896 | 6.56280733 | Homo sapiens | RefSeq | ILMN_11562  | ILMN_11562  |
| 9.80641268 | 11.8570576 | 11.9640108 | Homo sapiens | RefSeq | ILMN_8146   | ILMN_8146   |
| 5.91669733 | 6.94386742 | 5.73199263 | Homo sapiens | RefSeq | ILMN_9065   | ILMN_9065   |
| 7.75258336 | 9.40231821 | 9.00914979 | Homo sapiens | RefSeq | ILMN_4662   | ILMN_165570 |
| 13.4084359 | 14.2533667 | 14.3859958 | Homo sapiens | RefSeq | ILMN_3192   | ILMN_3192   |
| 7.01203002 | 8.49933527 | 7.31517946 | Homo sapiens | RefSeq | ILMN_12611  | ILMN_13173  |
| 12.0130089 | 12.4914255 | 12.7418356 | Homo sapiens | RefSeq | ILMN_11171  | ILMN_16074  |
| 8.53037551 | 10.1701554 | 10.7000998 | Homo sapiens | RefSeq | ILMN_19425  | ILMN_19425  |
| 10.9656602 | 12.4339701 | 12.8920443 | Homo sapiens | RefSeq | ILMN_8829   | ILMN_8829   |
| 9.05136476 | 9.87390115 | 9.61277397 | Homo sapiens | RefSeq | ILMN_12517  | ILMN_12517  |
| 7.64959893 | 9.47157219 | 9.33444984 | Homo sapiens | RefSeq | ILMN_9298   | ILMN_179207 |
| 7.27916946 | 8.93435874 | 7.75690987 | Homo sapiens | RefSeq | ILMN_7804   | ILMN_7804   |
| 9.26028517 | 10.3441838 | 10.3582446 | Homo sapiens | RefSeq | ILMN_21292  | ILMN_164727 |
| 5.47711646 | 5.50914602 | 5.39452889 | Homo sapiens | RefSeq | ILMN_45279  | ILMN_45279  |
| 9.54392772 | 12.8809778 | 13.5569155 | Homo sapiens | RefSeq | ILMN_23476  | ILMN_23476  |
| 6.00082255 | 6.57540461 | 6.48576943 | Homo sapiens | RefSeq | ILMN_17742  | ILMN_17742  |
| 5.87419203 | 6.68151673 | 6.45664502 | Homo sapiens | RefSeq | ILMN_9041   | ILMN_166025 |
| 10.6973056 | 12.1960992 | 12.4550963 | Homo sapiens | RefSeq | ILMN_28796  | ILMN_28796  |
| 6.11374883 | 7.74810561 | 8.66813012 | Homo sapiens | RefSeq | ILMN_13325  | ILMN_13325  |
| 8.88433783 | 10.4517211 | 11.1148563 | Homo sapiens | RefSeq | ILMN_18970  | ILMN_18970  |
| 9.13093988 | 9.86079508 | 9.68253028 | Homo sapiens | RefSeq | ILMN_6070   | ILMN_6070   |
| 6.32530294 | 7.03278521 | 7.56126656 | Homo sapiens | RefSeq | ILMN_15080  | ILMN_15080  |
| 8.34775069 | 9.4023568  | 9.99042453 | Homo sapiens | RefSeq | ILMN_38143  | ILMN_39285  |
| 6.32249082 | 6.94447664 | 7.21137827 | Homo sapiens | RefSeq | ILMN_12235  | ILMN_163778 |
| 12.1448542 | 13.0201605 | 13.1468219 | Homo sapiens | RefSeq | ILMN_37107  | ILMN_37107  |
| 7.77325857 | 9.20512929 | 9.10324217 | Homo sapiens | RefSeq | ILMN_3472   | ILMN_3472   |
| 5.60731788 | 6.07013297 | 6.16978213 | Homo sapiens | RefSeq | ILMN_34080  | ILMN_34080  |
| 7.47569128 | 8.2680914  | 8.23323475 | Homo sapiens | RefSeq | ILMN_11126  | ILMN_11126  |
| 6.33303725 | 7.31080543 | 7.46615397 | Homo sapiens | RefSeq | ILMN_14436  | ILMN_175775 |
| 11.9295957 | 12.8262776 | 13.0895258 | Homo sapiens | RefSeq | ILMN_26264  | ILMN_26264  |
| 6.7447168  | 8.11050576 | 7.51891984 | Homo sapiens | RefSeq | ILMN_25018  | ILMN_183093 |
| 6.8399004  | 8.62482104 | 8.64773651 | Homo sapiens | RefSeq | ILMN_14371  | ILMN_162663 |
| 6.80666175 | 8.21699413 | 8.1548176  | Homo sapiens | RefSeq | ILMN_17714  | ILMN_28998  |

|            |            |            |              |         |             |             |
|------------|------------|------------|--------------|---------|-------------|-------------|
| 6.41694291 | 7.11535791 | 7.32205523 | Homo sapiens | RefSeq  | ILMN_7082   | ILMN_7082   |
| 5.83204617 | 7.15401504 | 6.58568397 | Homo sapiens | RefSeq  | ILMN_139301 | ILMN_12834  |
| 5.9507572  | 6.60119003 | 6.60960472 | Homo sapiens | RefSeq  | ILMN_603    | ILMN_172522 |
| 6.84474468 | 7.09514908 | 7.22884081 | Homo sapiens | RefSeq  | ILMN_26589  | ILMN_172304 |
| 9.49874093 | 10.4078881 | 10.6662498 | Homo sapiens | RefSeq  | ILMN_12735  | ILMN_12735  |
| 8.10268595 | 9.41523325 | 9.58903612 | Homo sapiens | RefSeq  | ILMN_23452  | ILMN_163689 |
| 11.1344751 | 11.81807   | 11.8633976 | Homo sapiens | RefSeq  | ILMN_138365 | ILMN_138365 |
| 7.8003596  | 8.60400829 | 8.21552087 | Homo sapiens | RefSeq  | ILMN_631    | ILMN_631    |
| 6.45181659 | 7.02112878 | 7.20948066 | Homo sapiens | RefSeq  | ILMN_6117   | ILMN_6117   |
| 8.09604148 | 8.7463682  | 8.57771885 | Homo sapiens | RefSeq  | ILMN_2801   | ILMN_173774 |
| 7.0596592  | 8.06153213 | 8.0161241  | Homo sapiens | RefSeq  | ILMN_20456  | ILMN_26347  |
| 10.541932  | 11.3637345 | 11.5165023 | Homo sapiens | RefSeq  | ILMN_31021  | ILMN_31021  |
| 6.16944583 | 5.89546186 | 5.51038219 | Homo sapiens | RefSeq  | ILMN_8145   | ILMN_8145   |
| 12.9273945 | 13.7247334 | 13.7618452 | Homo sapiens | RefSeq  | ILMN_6782   | ILMN_6782   |
| 6.67172363 | 7.17625295 | 7.09090846 | Homo sapiens | RefSeq  | ILMN_407    | ILMN_179898 |
| 8.40839386 | 9.4224542  | 9.542739   | Homo sapiens | RefSeq  | ILMN_9587   | ILMN_166150 |
| 7.62536548 | 9.27986846 | 9.0571188  | Homo sapiens | RefSeq  | ILMN_16570  | ILMN_16570  |
| 6.10876969 | 6.41044677 | 6.33187501 | Homo sapiens | Unigene | ILMN_71475  | ILMN_71475  |
| 7.03630002 | 8.57814245 | 8.6109403  | Homo sapiens | Unigene | ILMN_110256 | ILMN_110256 |
| 5.76897031 | 6.02158411 | 6.45944211 | Homo sapiens | Unigene | ILMN_83667  | ILMN_83667  |
| 6.80473637 | 7.62913656 | 7.59877534 | Homo sapiens | Unigene | ILMN_88124  | ILMN_88124  |
| 5.56277757 | 5.68174104 | 5.51213427 | Homo sapiens | Unigene | ILMN_72534  | ILMN_72534  |
| 5.93081751 | 6.01640049 | 6.09168714 | Homo sapiens | Unigene | ILMN_72439  | ILMN_72439  |
| 6.17492928 | 6.8155242  | 6.69190679 | Homo sapiens | Unigene | ILMN_108071 | ILMN_108071 |
| 5.91663404 | 6.5062714  | 6.40411223 | Homo sapiens | Unigene | ILMN_122129 | ILMN_122129 |
| 5.5753677  | 5.6530216  | 5.68293196 | Homo sapiens | Unigene | ILMN_127638 | ILMN_127638 |
| 6.14682993 | 6.99273671 | 6.65014847 | Homo sapiens | Unigene | ILMN_79879  | ILMN_79879  |
| 7.20904584 | 8.69088951 | 8.4535077  | Homo sapiens | Unigene | ILMN_77737  | ILMN_77737  |
| 6.19957734 | 6.40525977 | 5.88512187 | Homo sapiens | Unigene | ILMN_79403  | ILMN_79403  |
| 5.85089216 | 7.15976137 | 7.15601733 | Homo sapiens | Unigene | ILMN_109663 | ILMN_109663 |
| 5.41209862 | 5.61590325 | 5.67415667 | Homo sapiens | Unigene | ILMN_129862 | ILMN_129862 |
| 5.66938626 | 6.16051587 | 6.51072794 | Homo sapiens | Unigene | ILMN_78641  | ILMN_78641  |
| 6.09696789 | 6.87201117 | 7.01254856 | Homo sapiens | Unigene | ILMN_77463  | ILMN_77463  |
| 5.61851178 | 5.92164317 | 5.76506235 | Homo sapiens | Unigene | ILMN_103202 | ILMN_103202 |
| 6.92748288 | 8.01268152 | 7.80938229 | Homo sapiens | Unigene | ILMN_126852 | ILMN_126852 |
| 5.73611478 | 6.78651273 | 7.0464867  | Homo sapiens | Unigene | ILMN_89339  | ILMN_89339  |
| 6.70335961 | 7.83953828 | 7.89070082 | Homo sapiens | Unigene | ILMN_87950  | ILMN_87950  |
| 6.02045331 | 6.65250514 | 6.46199275 | Homo sapiens | Unigene | ILMN_88401  | ILMN_88401  |
| 5.68810033 | 6.01200834 | 6.03536438 | Homo sapiens | Unigene | ILMN_116097 | ILMN_116097 |
| 6.91426672 | 8.90782083 | 8.70106729 | Homo sapiens | Unigene | ILMN_92403  | ILMN_92403  |
| 6.54124533 | 7.49441561 | 7.54890666 | Homo sapiens | Unigene | ILMN_79788  | ILMN_79788  |
| 6.92426738 | 7.50718573 | 7.20997479 | Homo sapiens | Unigene | ILMN_105449 | ILMN_105449 |
| 6.72490534 | 7.67033333 | 7.66126291 | Homo sapiens | Unigene | ILMN_117456 | ILMN_117456 |
| 5.97373272 | 6.82197164 | 6.31094172 | Homo sapiens | Unigene | ILMN_109018 | ILMN_109018 |
| 5.38814234 | 5.6400274  | 5.51004982 | Homo sapiens | Unigene | ILMN_95052  | ILMN_95052  |
| 5.72661245 | 6.40794242 | 6.38140175 | Homo sapiens | Unigene | ILMN_99761  | ILMN_99761  |
| 5.61538481 | 5.54358682 | 5.66604473 | Homo sapiens | Unigene | ILMN_114283 | ILMN_114283 |
| 6.25507069 | 8.29989577 | 8.24923484 | Homo sapiens | Unigene | ILMN_92383  | ILMN_92383  |

|            |            |            |              |               |             |             |
|------------|------------|------------|--------------|---------------|-------------|-------------|
| 5.41443527 | 6.40685857 | 6.45951883 | Homo sapiens | Unigene       | ILMN_73408  | ILMN_73408  |
| 5.99587522 | 6.57032373 | 6.5101899  | Homo sapiens | Unigene       | ILMN_99800  | ILMN_99800  |
| 6.03929678 | 6.38247653 | 7.20121628 | Homo sapiens | Unigene       | ILMN_121484 | ILMN_121484 |
| 5.61851442 | 6.1781294  | 6.12093228 | Homo sapiens | Unigene       | ILMN_109150 | ILMN_109150 |
| 5.9236479  | 6.87604047 | 6.95389843 | Homo sapiens | Unigene       | ILMN_84672  | ILMN_84672  |
| 6.62531857 | 8.2508588  | 8.16564719 | Homo sapiens | Unigene       | ILMN_78063  | ILMN_78063  |
| 7.48491068 | 8.50950425 | 8.53226474 | Homo sapiens | Unigene       | ILMN_127215 | ILMN_127215 |
| 6.75467108 | 8.49404953 | 7.8014303  | Homo sapiens | Unigene       | ILMN_74776  | ILMN_74776  |
| 5.58783361 | 5.57974012 | 5.67440726 | Homo sapiens | Unigene       | ILMN_74698  | ILMN_74698  |
| 6.14740867 | 6.85517247 | 7.14860979 | Homo sapiens | Unigene       | ILMN_95926  | ILMN_95926  |
| 5.74183611 | 6.49237109 | 6.47857792 | Homo sapiens | Unigene       | ILMN_123922 | ILMN_123922 |
| 6.41141642 | 7.18474545 | 7.44757259 | Homo sapiens | Unigene       | ILMN_104197 | ILMN_104197 |
| 8.10830385 | 9.16661528 | 8.3070546  | Homo sapiens | Unigene       | ILMN_88069  | ILMN_88069  |
| 5.89651309 | 6.31232718 | 6.04533615 | Homo sapiens | Unigene       | ILMN_115613 | ILMN_115613 |
| 6.20224511 | 7.59002933 | 7.27089051 | Homo sapiens | Unigene       | ILMN_87223  | ILMN_87223  |
| 6.01642055 | 7.09681739 | 7.56708906 | Homo sapiens | Unigene       | ILMN_82381  | ILMN_82381  |
| 5.8587755  | 6.39020766 | 6.98962611 | Homo sapiens | Unigene       | ILMN_113840 | ILMN_113840 |
| 6.08754664 | 6.91100122 | 6.91031174 | Homo sapiens | Unigene       | ILMN_117493 | ILMN_117493 |
| 5.90611638 | 6.48274989 | 5.99353036 | Homo sapiens | Unigene       | ILMN_84598  | ILMN_84598  |
| 5.33306803 | 5.50428256 | 5.43861423 | Homo sapiens | Unigene       | ILMN_83745  | ILMN_83745  |
| 5.41592257 | 5.61916882 | 5.60920268 | Homo sapiens | Unigene       | ILMN_114953 | ILMN_114953 |
| 6.11630611 | 7.19650279 | 7.31186636 | Homo sapiens | Unigene       | ILMN_92557  | ILMN_92557  |
| 5.41922234 | 5.54791494 | 5.43992361 | Homo sapiens | Unigene       | ILMN_105493 | ILMN_105493 |
| 6.19599792 | 6.22783501 | 6.34136048 | Homo sapiens | Unigene       | ILMN_115487 | ILMN_115487 |
| 5.50281176 | 5.72124277 | 6.05887017 | Homo sapiens | Unigene       | ILMN_110945 | ILMN_110945 |
| 5.74270609 | 5.9758255  | 5.36278231 | Homo sapiens | Unigene       | ILMN_125443 | ILMN_125443 |
| 5.88200617 | 7.5932447  | 6.91074825 | Homo sapiens | Unigene       | ILMN_93354  | ILMN_93354  |
| 5.98193437 | 6.69571966 | 6.45524288 | Homo sapiens | Unigene       | ILMN_71784  | ILMN_71784  |
| 5.67313237 | 6.06788864 | 6.09339982 | Homo sapiens | Unigene       | ILMN_86767  | ILMN_86767  |
| 6.01742022 | 7.27328742 | 7.31751572 | Homo sapiens | Unigene       | ILMN_93814  | ILMN_93814  |
| 6.55833469 | 7.25028989 | 7.28333195 | Homo sapiens | Unigene       | ILMN_122524 | ILMN_122524 |
| 6.2408871  | 6.74431989 | 6.58973323 | Homo sapiens | Unigene       | ILMN_94830  | ILMN_94830  |
| 7.40017499 | 9.16748037 | 8.75643023 | Homo sapiens | Unigene       | ILMN_76886  | ILMN_76886  |
| 5.90778936 | 6.40991259 | 7.22441754 | Homo sapiens | Unigene       | ILMN_124625 | ILMN_124625 |
| 6.42576123 | 6.69258342 | 6.60469481 | Homo sapiens | Unigene       | ILMN_134294 | ILMN_134294 |
| 6.23599639 | 6.87516079 | 6.53738849 | Homo sapiens | Unigene       | ILMN_96448  | ILMN_96448  |
| 5.92923615 | 6.55106453 | 7.07721095 | Homo sapiens | Unigene       | ILMN_113743 | ILMN_113743 |
| 7.16264208 | 8.97357081 | 8.96305125 | Homo sapiens | Unigene       | ILMN_79925  | ILMN_79925  |
| 6.35363258 | 7.23498025 | 7.15138801 | Homo sapiens | Unigene       | ILMN_134444 | ILMN_134444 |
| 6.28148851 | 7.01563806 | 7.54175797 | Homo sapiens | Unigene       | ILMN_123332 | ILMN_123332 |
| 5.5156929  | 6.02768797 | 6.03937071 | Homo sapiens | Unigene       | ILMN_91878  | ILMN_91878  |
| 5.85297512 | 7.06959369 | 6.33078282 | Homo sapiens | Unigene       | ILMN_77095  | ILMN_77095  |
| 12.0845237 | 12.771378  | 13.2017821 | Homo sapiens | ILMN_Controls |             | ILMN_160472 |



| ILMN_Gene              | Source_Reference_ID | RefSeq_ID      | Unigene_ID | Entrez_Gene_ID |
|------------------------|---------------------|----------------|------------|----------------|
| DTX2P1-UPK3BP1-PMS2P11 | XM_933516.1         | XM_933516.1    |            | 643862         |
| LINC00243              | XM_936105.1         | XM_936105.1    |            | 642035         |
| LINC-PINT              | XM_935575.1         | XM_935575.1    |            | 641825         |
| LINC00639              | XM_378454.3         | XM_378454.3    |            | 283547         |
| AC068587.4             | XM_943677.1         | XM_943677.1    |            | 654053         |
| AL445524.1             | XM_933693.2         | XM_933693.2    |            | 440731         |
| DNAJC3-DT              | XM_943048.1         | XM_943048.1    |            | 647834         |
| AL162377.1             | XR_000601.1         | XR_000601.1    |            | 283521         |
| AC108134.3             | XM_941963.1         | XM_941963.1    |            | 649754         |
| LINC-PINT              | XM_930545.1         | XM_930545.1    |            | 378805         |
| AC114980.1             | XR_001261.1         | XR_001261.1    |            | 80042          |
| LINC00921              | XM_370932.4         | XM_370932.4    |            | 283876         |
| SCARNA9                | NR_002569.1         | NR_002569.1    |            | 619383         |
| AC113143.1             | Hs.571432           |                | Hs.571432  | NA             |
| LINC02555              | Hs.306876           |                | Hs.306876  | NA             |
| HDAC4-AS1              | Hs.534680           |                | Hs.534680  | NA             |
| AC123595.1             | Hs.482814           |                | Hs.482814  | NA             |
| FOXP1-IT1              | Hs.549989           |                | Hs.549989  | NA             |
| AC004803.1             | Hs.270094           |                | Hs.270094  | NA             |
| NDUFV2-AS1             | Hs.569879           |                | Hs.569879  | NA             |
| PRKCQ-AS1              | Hs.13262            |                | Hs.13262   | NA             |
| RNU6ATAC35P            | Hs.562110           |                | Hs.562110  | NA             |
| MIR29B2CHG             | Hs.445414           |                | Hs.445414  | NA             |
| TXN                    | NM_003329.1         | NM_003329.1    |            | NA             |
| RPS28                  | NM_001031.4         | NM_001031.4    |            | 6234           |
| GADD45G                | NM_006705.2         | NM_006705.2    |            | 10912          |
| RPS16                  | NM_001020.4         | NM_001020.4    |            | 6217           |
| ABCC5                  | NM_001023587.1      | NM_001023587.1 |            | 10057          |
| GNG10                  | NM_001017998.2      | NM_001017998.2 |            | 2790           |
| LMBRD1                 | NM_018368.2         | NM_018368.2    |            | 55788          |
| LOC647361              | XM_936430.2         | XM_936430.2    |            | 647361         |
| C9ORF19                | NM_022343.2         | NM_022343.2    |            | 152007         |
| RPS6KA3                | NM_004586.2         | NM_004586.2    |            | 6197           |
| RAXL1                  | NM_032753.2         | NM_032753.2    |            | 84839          |
| LOC390033              | XM_372345.3         | XM_372345.3    |            | 390033         |
| PBEF1                  | NM_005746.2         | NM_005746.2    |            | 10135          |
| LOC644250              | XM_929199.1         | XM_929199.1    |            | 644250         |
| TMPIT                  | NM_031925.1         | NM_031925.1    |            | 83862          |
| PLAU                   | NM_002658.2         | NM_002658.2    |            | 5328           |
| PPP2R3A                | NM_181897.1         | NM_181897.1    |            | 5523           |
| ZYG11B                 | NM_024646.1         | NM_024646.1    |            | 79699          |
| CD82                   | NM_002231.3         | NM_002231.3    |            | 3732           |
| POLR2J                 | NM_006234.4         | NM_006234.4    |            | 5439           |
| LOC284757              | NM_001004305.1      | NM_001004305.1 |            | 284757         |
| KIAA0319               | NM_014809.2         | NM_014809.2    |            | 9856           |
| RPS6KA5                | NM_004755.2         | NM_004755.2    |            | 9252           |
| MEGF9                  | NM_001080497.1      | NM_001080497.1 |            | 1955           |

|            |                |                |        |
|------------|----------------|----------------|--------|
| LOC644852  | XM_934218.2    | XM_934218.2    | 644852 |
| LOC653635  | XR_017611.1    | XR_017611.1    | 653635 |
| HIST2H2AA3 | NM_003516.2    | NM_003516.2    | 8337   |
| TXNL5      | NM_032731.2    | NM_032731.2    | 84817  |
| LOC653158  | XM_926814.1    | XM_926814.1    | 653158 |
| PAK2       | XM_936511.1    | XM_936511.1    | 5062   |
| RPS27      | NM_001030.3    | NM_001030.3    | 6232   |
| GPR177     | NM_001002292.1 | NM_001002292.1 | 79971  |
| LOC653352  | XM_934316.1    | XM_934316.1    | 653352 |
| CSF2RA     | NM_172246.1    | NM_172246.1    | 1438   |
| LOC646424  | XM_941267.2    | XM_941267.2    | 646424 |
| ZMYM2      | NM_003453.2    | NM_003453.2    | 7750   |
| PPP2R3C    | NM_017917.2    | NM_017917.2    | 55012  |
| GPR160     | NM_014373.1    | NM_014373.1    | 26996  |
| FLJ11151   | NM_018340.1    | NM_018340.1    | 55313  |
| RGR        | NM_153615.1    | NM_153615.1    | 266747 |
| EFCBP2     | NM_019065.2    | NM_019065.2    | 54550  |
| CACNA1E    | NM_000721.2    | NM_000721.2    | 777    |
| DLD        | NM_000108.3    | NM_000108.3    | 1738   |
| UNC119     | NM_005148.2    | NM_005148.2    | 9094   |
| LOC653604  | XM_497711.2    | XM_497711.2    | 653604 |
| TMBIM4     | NM_016056.2    | NM_016056.2    | 51643  |
| WSB1       | NM_015626.8    | NM_015626.8    | 26118  |
| SH3BP5L    | NM_030645.1    | NM_030645.1    | 80851  |
| USP15      | NM_006313.1    | NM_006313.1    | 9958   |
| LOC390466  | XM_372521.1    | XM_372521.1    | 390466 |
| AKTIP      | NM_022476.2    | NM_022476.2    | 64400  |
| TRIM56     | NM_030961.1    | NM_030961.1    | 81844  |
| CDC123     | NM_006023.1    | NM_006023.1    | 8872   |
| NKX3-1     | NM_006167.2    | NM_006167.2    | 4824   |
| LPPR2      | NM_022737.1    | NM_022737.1    | 64748  |
| SULF2      | NM_198596.1    | NM_198596.1    | 55959  |
| IFRD1      | NM_001550.2    | NM_001550.2    | 3475   |
| LOC728825  | XM_001128769.1 | XM_001128769.1 | 728825 |
| NTNG2      | NM_032536.1    | NM_032536.1    | 84628  |
| LOC391475  | XM_937277.1    | XM_937277.1    | 391475 |
| DHRS12     | NM_001031719.1 | NM_001031719.1 | 79758  |
| PDE7A      | NM_002604.1    | NM_002604.1    | 5150   |
| MNDA       | NM_002432.1    | NM_002432.1    | 4332   |
| ARID3A     | NM_005224.2    | NM_005224.2    | 1820   |
| CYORF15A   | NM_001005852.1 | NM_001005852.1 | 246126 |
| CIR        | NM_004882.3    | NM_004882.3    | 9541   |
| CLCC1      | NM_001048210.1 | NM_001048210.1 | 23155  |
| TOB1       | NM_005749.2    | NM_005749.2    | 10140  |
| SP110      | NM_004510.2    | NM_004510.2    | 3431   |
| LMNB1      | NM_005573.2    | NM_005573.2    | 4001   |
| F2RL1      | NM_005242.3    | NM_005242.3    | 2150   |
| LOC652578  | XM_942097.1    | XM_942097.1    | 652578 |

|           |                |                |        |
|-----------|----------------|----------------|--------|
| C9ORF95   | NM_017881.1    | NM_017881.1    | 54981  |
| HSD17B11  | NM_016245.2    | NM_016245.2    | 51170  |
| LOC441268 | NM_001013725.1 | NM_001013725.1 | 441268 |
| SIRPB1    | NM_006065.1    | NM_006065.1    | 10326  |
| IFNGR1    | NM_000416.1    | NM_000416.1    | 3459   |
| NBPF9     | XM_934022.1    | XM_934022.1    | 440670 |
| CUEDC1    | NM_017949.1    | NM_017949.1    | 404093 |
| Septin 2  | NM_001008491.1 | NM_001008491.1 | 4735   |
| CLEC4D    | NM_080387.4    | NM_080387.4    | 338339 |
| LOC731706 | XR_016005.1    | XR_016005.1    | 731706 |
| PTGS2     | NM_000963.1    | NM_000963.1    | 5743   |
| RAB24     | NM_130781.2    | NM_130781.2    | 53917  |
| MME       | NM_007288.2    | NM_007288.2    | 4311   |
| UPB1      | NM_016327.2    | NM_016327.2    | 51733  |
| TAF15     | NM_139215.1    | NM_139215.1    | 8148   |
| BCYRN1    | NR_001568.1    | NR_001568.1    | 618    |
| RAPGEF1   | NM_198679.1    | NM_198679.1    | 2889   |
| VNN2      | NM_078488.1    | NM_078488.1    | 8875   |
| SCGB3A1   | NM_052863.2    | NM_052863.2    | 92304  |
| LOC651894 | XM_941155.2    | XM_941155.2    | 651894 |
| USP49     | NM_018561.3    | NM_018561.3    | 25862  |
| TXN       | NM_003329.2    | NM_003329.2    | 7295   |
| ACP6      | NM_016361.2    | NM_016361.2    | 51205  |
| LOC650919 | XM_944417.1    | XM_944417.1    | 650919 |
| PRKAR2A   | NM_004157.2    | NM_004157.2    | 5576   |
| NT5C2     | NM_012229.2    | NM_012229.2    | 22978  |
| UBE2D3    | NM_181889.1    | NM_181889.1    | 7323   |
| PBX2      | NM_002586.4    | NM_002586.4    | 5089   |
| PFKFB2    | NM_006212.2    | NM_006212.2    | 5208   |
| TMEM154   | NM_152680.1    | NM_152680.1    | 201799 |
| THRAP2    | NM_015335.2    | NM_015335.2    | 23389  |
| ASAH1     | NM_177924.2    | NM_177924.2    | 427    |
| ACSL1     | NM_001995.2    | NM_001995.2    | 2180   |
| PSG11     | NM_002785.2    | NM_002785.2    | 5680   |
| TMCC3     | NM_020698.1    | NM_020698.1    | 57458  |
| C15ORF51  | NR_003260.1    | NR_003260.1    | 196968 |
| THBS1     | NM_003246.2    | NM_003246.2    | 7057   |
| SLCO4C1   | NM_180991.4    | NM_180991.4    | 353189 |
| MGEA5     | NM_012215.1    | NM_012215.1    | 10724  |
| HLX1      | NM_021958.2    | NM_021958.2    | 3142   |
| SULF2     | NM_018837.2    | NM_018837.2    | 55959  |
| RBM7      | NM_016090.2    | NM_016090.2    | 10179  |
| IFI6      | NM_002038.3    | NM_002038.3    | 2537   |
| LOC651894 | XM_941155.2    | XM_941155.2    | 651894 |
| PTP4A2    | XM_944915.1    | XM_944915.1    | 8073   |
| CAMP      | NM_004345.3    | NM_004345.3    | 820    |
| HIST1H2BH | NM_003524.2    | NM_003524.2    | 8345   |
| TNFRSF12A | NM_016639.1    | NM_016639.1    | 51330  |

|           |                |                |        |
|-----------|----------------|----------------|--------|
| C19ORF40  | NM_152266.1    | NM_152266.1    | 91442  |
| PTPLAD2   | NM_001010915.1 | NM_001010915.1 | 401494 |
| STAT1     | NM_139266.1    | NM_139266.1    | 6772   |
| PSMD12    | XM_001134072.1 | XM_001134072.1 | 5718   |
| PLAUR     | NM_001005376.1 | NM_001005376.1 | 5329   |
| LOC646064 | XM_933375.1    | XM_933375.1    | 646064 |
| IL4R      | NM_001008699.1 | NM_001008699.1 | 3566   |
| ZNF14     | NM_021030.2    | NM_021030.2    | 7561   |
| BCKDK     | NM_005881.1    | NM_005881.1    | 10295  |
| CMTM1     | NM_181301.1    | NM_181301.1    | 113540 |
| ALPP      | NM_001632.3    | NM_001632.3    | 250    |
| GADD45A   | NM_001924.2    | NM_001924.2    | 1647   |
| ICA1      | NM_022308.1    | NM_022308.1    | 3382   |
| CLTCL1    | NM_007098.2    | NM_007098.2    | 8218   |
| RPS29     | NM_001032.3    | NM_001032.3    | 6235   |
| LOC653610 | XM_928387.1    | XM_928387.1    | 653610 |
| SRPK2     | NM_182692.1    | NM_182692.1    | 6733   |
| CLK4      | NM_020666.2    | NM_020666.2    | 57396  |
| LOC642333 | XR_019071.1    | XR_019071.1    | 642333 |
| MME       | NM_000902.3    | NM_000902.3    | 4311   |
| PYGL      | NM_002863.3    | NM_002863.3    | 5836   |
| ROPN1L    | NM_031916.2    | NM_031916.2    | 83853  |
| TLE4      | NM_007005.3    | NM_007005.3    | 7091   |
| FARSLB    | NM_005687.2    | NM_005687.2    | 10056  |
| LOC649841 | XM_938906.2    | XM_938906.2    | 649841 |
| RBM3      | NM_001017431.1 | NM_001017431.1 | 5935   |
| LOC440926 | XR_017837.1    | XR_017837.1    | 440926 |
| IFIT1     | NM_001548.2    | NM_001548.2    | 3434   |
| LOC442609 | XM_935827.1    | XM_935827.1    | 442609 |
| USP9Y     | NM_004654.3    | NM_004654.3    | 8287   |
| LOC400721 | XR_018616.1    | XR_018616.1    | 400721 |
| CLEC7A    | NM_197953.1    | NM_197953.1    | 64581  |
| SAP30     | NM_003864.3    | NM_003864.3    | 8819   |
| UTY       | NM_182659.1    | NM_182659.1    | 7404   |
| PFN2      | NM_053024.3    | NM_053024.3    | 5217   |
| MXD1      | NM_002357.2    | NM_002357.2    | 4084   |
| HSD17B12  | NM_016142.1    | NM_016142.1    | 51144  |
| SF3B14    | NM_016047.3    | NM_016047.3    | 51639  |
| LOC347376 | XM_937928.1    | XM_937928.1    | 347376 |
| LOC283152 | NM_001033658.1 | NM_001033658.1 | 283152 |
| CAMK1D    | NM_020397.2    | NM_020397.2    | 57118  |
| LOC653635 | XR_017611.1    | XR_017611.1    | 653635 |
| EIF2AK2   | NM_002759.1    | NM_002759.1    | 5610   |
| BIN3      | NM_018688.4    | NM_018688.4    | 55909  |
| GOLPH3    | NM_022130.3    | NM_022130.3    | 64083  |
| EXOSC3    | NM_001002269.1 | NM_001002269.1 | 51010  |
| RUNDC2B   | NM_001012391.1 | NM_001012391.1 | 400509 |
| LOC647499 | XM_942939.1    | XM_942939.1    | 647499 |

|              |                |                |        |
|--------------|----------------|----------------|--------|
| LOC644591    | XM_927706.2    | XM_927706.2    | 644591 |
| RGS2         | NM_002923.1    | NM_002923.1    | 5997   |
| LOC653489    | XM_934113.1    | XM_934113.1    | 653489 |
| LOC645895    | XM_928866.1    | XM_928866.1    | 645895 |
| GMFG         | NM_004877.1    | NM_004877.1    | 9535   |
| LOC644969    | XM_928047.1    | XM_928047.1    | 644969 |
| CKLF         | NM_016326.2    | NM_016326.2    | 51192  |
| NUDT16P      | NR_002949.1    | NR_002949.1    | 152195 |
| LOC653505    | XM_927767.2    | XM_927767.2    | 653505 |
| NQO2         | NM_000904.1    | NM_000904.1    | 4835   |
| PBLD         | NM_022129.3    | NM_022129.3    | 64081  |
| S100A6       | NM_014624.3    | NM_014624.3    | 6277   |
| ZNF786       | NM_152411.1    | NM_152411.1    | 136051 |
| FAM101B      | XM_001126665.1 | XM_001126665.1 | 359845 |
| FAM101B      | NM_182705.2    | NM_182705.2    | 359845 |
| ZNF354A      | NM_005649.2    | NM_005649.2    | 6940   |
| S100A9       | NM_002965.3    | NM_002965.3    | 6280   |
| LOC440160    | XM_498571.2    | XM_498571.2    | 440160 |
| OGFRL1       | NM_024576.3    | NM_024576.3    | 79627  |
| RBP7         | NM_052960.1    | NM_052960.1    | 116362 |
| C22ORF34     | NM_001039473.1 | NM_001039473.1 | 348645 |
| PVRL2        | NM_002856.2    | NM_002856.2    | 5819   |
| FLJ31951     | NM_144726.1    | NM_144726.1    | 153830 |
| HAL          | NM_002108.2    | NM_002108.2    | 3034   |
| ARSG         | NM_014960.2    | NM_014960.2    | 22901  |
| USP10        | NM_005153.2    | NM_005153.2    | 9100   |
| CSF2RA       | XM_942501.1    | XM_942501.1    | 1438   |
| DKFZP564K142 | NM_032121.3    | NM_032121.3    | 84061  |
| EXOC8        | NM_175876.3    | NM_175876.3    | 149371 |
| PPARBP       | NM_004774.2    | NM_004774.2    | 5469   |
| DHRS8        | XM_001132265.1 | XM_001132265.1 | 51170  |
| LOC728575    | XM_001127825.1 | XM_001127825.1 | 728575 |
| LTB4R        | NM_181657.1    | NM_181657.1    | 1241   |
| HK2          | NM_000189.4    | NM_000189.4    | 3099   |
| LOC402176    | NM_001011538.1 | NM_001011538.1 | 402176 |
| LMTK2        | NM_014916.2    | NM_014916.2    | 22853  |
| TACC3        | NM_006342.1    | NM_006342.1    | 10460  |
| LY96         | NM_015364.2    | NM_015364.2    | 23643  |
| B2M          | NM_004048.2    | NM_004048.2    | 567    |
| C12ORF35     | NM_018169.2    | NM_018169.2    | 55196  |
| HECTD2       | NM_173497.1    | NM_173497.1    | 143279 |
| TNRC6B       | NM_001024843.1 | NM_001024843.1 | 23112  |
| ZKSCAN1      | NM_003439.1    | NM_003439.1    | 7586   |
| FCGR3B       | NM_000570.2    | NM_000570.2    | 2215   |
| CREB5        | NM_001011666.1 | NM_001011666.1 | 9586   |
| IL17RA       | NM_014339.4    | NM_014339.4    | 23765  |
| PTPRN2       | NM_130843.1    | NM_130843.1    | 5799   |
| RNF130       | NM_018434.4    | NM_018434.4    | 55819  |

|           |                |                |        |
|-----------|----------------|----------------|--------|
| TNNI2     | NM_003282.2    | NM_003282.2    | 7136   |
| S100A8    | NM_002964.3    | NM_002964.3    | 6279   |
| FOLR3     | NM_000804.2    | NM_000804.2    | 2352   |
| ANKRD30B  | NM_001029862.1 | NM_001029862.1 | 374860 |
| CDK5R1    | NM_003885.2    | NM_003885.2    | 8851   |
| TLR1      | NM_003263.3    | NM_003263.3    | 7096   |
| KIAA1618  | NM_020954.2    | NM_020954.2    | 57714  |
| RPL26     | NM_000987.3    | NM_000987.3    | 6154   |
| ORM2      | NM_000608.2    | NM_000608.2    | 5005   |
| CEP152    | NM_014985.1    | NM_014985.1    | 22995  |
| LOC653316 | XM_933119.1    | XM_933119.1    | 653316 |
| PPM1B     | NM_001033556.1 | NM_001033556.1 | 5495   |
| KLF6      | NM_001300.4    | NM_001300.4    | 1316   |
| CYSLTR1   | NM_006639.2    | NM_006639.2    | 10800  |
| LOC644033 | XM_927280.1    | XM_927280.1    | 644033 |
| YRDC      | NM_024640.3    | NM_024640.3    | 79693  |
| CYP4F3    | NM_000896.1    | NM_000896.1    | 4051   |
| PHACTR1   | NM_030948.1    | NM_030948.1    | 221692 |
| PCMTD1    | NM_052937.1    | NM_052937.1    | 115294 |
| FLJ34047  | NM_173669.1    | NM_173669.1    | 285696 |
| RPS29     | NM_001032.3    | NM_001032.3    | 6235   |
| CEP27     | NM_018097.1    | NM_018097.1    | 55142  |
| LOC644964 | XM_928041.1    | XM_928041.1    | 644964 |
| GOLGA2    | NM_004486.4    | NM_004486.4    | 2801   |
| LOC643284 | XM_928180.1    | XM_928180.1    | 643284 |
| UPF2      | NM_015542.2    | NM_015542.2    | 26019  |
| RN7SK     | NR_001445.1    | NR_001445.1    | 125050 |
| UTY       | NM_007125.3    | NM_007125.3    | 7404   |
| PPP1R12A  | NM_002480.1    | NM_002480.1    | 4659   |
| RAB3GAP1  | NM_012233.1    | NM_012233.1    | 22930  |
| C14ORF102 | NM_017970.2    | NM_017970.2    | 55051  |
| FCAR      | NM_133279.1    | NM_133279.1    | 2204   |
| OSCAR     | NM_130771.2    | NM_130771.2    | 126014 |
| KIF1B     | NM_183416.2    | NM_183416.2    | 23095  |
| PHF3      | NM_015153.1    | NM_015153.1    | 23469  |
| LOC653829 | XM_935802.1    | XM_935802.1    | 653829 |
| MDM4      | NM_002393.2    | NM_002393.2    | 4194   |
| EPC1      | NM_025209.2    | NM_025209.2    | 80314  |
| RAE1      | NM_003610.3    | NM_003610.3    | 8480   |
| PSCDBP    | NM_004288.3    | NM_004288.3    | 9595   |
| LOC643882 | XM_931879.1    | XM_931879.1    | 643882 |
| ZNF346    | NM_012279.2    | NM_012279.2    | 23567  |
| JDP2      | NM_130469.2    | NM_130469.2    | 122953 |
| SLC2A11   | NM_001024938.1 | NM_001024938.1 | 66035  |
| SLC5A9    | NM_001011547.1 | NM_001011547.1 | 200010 |
| LOC730740 | XM_001128558.1 | XM_001128558.1 | 730740 |
| S100A12   | NM_005621.1    | NM_005621.1    | 6283   |
| RCSD1     | NM_052862.2    | NM_052862.2    | 92241  |

|           |                |                |        |
|-----------|----------------|----------------|--------|
| CSF2RA    | NM_172246.1    | NM_172246.1    | 1438   |
| SDHALP1   | NR_003264.1    | NR_003264.1    | 255812 |
| AMN1      | NM_207337.1    | NM_207337.1    | 196394 |
| TM6SF1    | NM_023003.1    | NM_023003.1    | 53346  |
| C7ORF25   | NM_024054.1    | NM_024054.1    | 79020  |
| FLJ90086  | XM_371820.5    | XM_371820.5    | 389389 |
| SYNJ2     | NM_003898.2    | NM_003898.2    | 8871   |
| STX10     | NM_003765.1    | NM_003765.1    | 8677   |
| RFFL      | NM_001017368.1 | NM_001017368.1 | 117584 |
| ADCK4     | NM_024876.2    | NM_024876.2    | 79934  |
| TRIM25    | NM_005082.4    | NM_005082.4    | 7706   |
| ANKRD44   | NM_153697.1    | NM_153697.1    | 91526  |
| HEBP2     | NM_014320.2    | NM_014320.2    | 23593  |
| EIF2AK4   | NM_001013703.2 | NM_001013703.2 | 440275 |
| RPL23     | NM_000978.3    | NM_000978.3    | 9349   |
| CYORF15B  | NM_032576.2    | NM_032576.2    | 84663  |
| LOC647691 | XM_936748.1    | XM_936748.1    | 647691 |
| TNFSF13B  | NM_006573.3    | NM_006573.3    | 10673  |
| FADD      | NM_003824.2    | NM_003824.2    | 8772   |
| RGS18     | NM_130782.2    | NM_130782.2    | 64407  |
| TAP2      | NM_018833.2    | NM_018833.2    | 6891   |
| PNMA6A    | NM_032882.2    | NM_032882.2    | 84968  |
| LOC643509 | XM_928156.1    | XM_928156.1    | 643509 |
| SRGN      | NM_002727.2    | NM_002727.2    | 5552   |
| EOMES     | NM_005442.2    | NM_005442.2    | 8320   |
| PSMA1     | NM_148976.1    | NM_148976.1    | 5682   |
| ENSA      | NM_207168.1    | NM_207168.1    | 2029   |
| C10ORF119 | NM_024834.1    | NM_024834.1    | 79892  |
| HIF1A     | NM_001530.2    | NM_001530.2    | 3091   |
| RBMXL1    | NM_019610.3    | NM_019610.3    | 494115 |
| EVI2B     | NM_006495.2    | NM_006495.2    | 2124   |
| IRS2      | NM_003749.2    | NM_003749.2    | 8660   |
| ANPEP     | NM_001150.1    | NM_001150.1    | 290    |
| MBOAT1    | XM_001131044.1 | XM_001131044.1 | 154141 |
| HDAC4     | NM_006037.2    | NM_006037.2    | 9759   |
| ZNF585A   | NM_152655.2    | NM_152655.2    | 199704 |
| OXER1     | NM_148962.4    | NM_148962.4    | 165140 |
| MAP3K2    | NM_006609.3    | NM_006609.3    | 10746  |
| RAP1A     | NM_001010935.1 | NM_001010935.1 | 5906   |
| LOC552891 | NM_004125.2    | NM_004125.2    | 552891 |
| RBM25     | NM_021239.1    | NM_021239.1    | 58517  |
| ARPC5     | NM_005717.2    | NM_005717.2    | 10092  |
| LOC440093 | NM_001013699.1 | NM_001013699.1 | 440093 |
| NT5C3     | NM_001002009.1 | NM_001002009.1 | 51251  |
| RPL32     | NM_001007074.1 | NM_001007074.1 | 6161   |
| ANKRD55   | NM_024669.2    | NM_024669.2    | 79722  |
| LOC649821 | XM_942212.2    | XM_942212.2    | 649821 |
| BST1      | NM_004334.1    | NM_004334.1    | 683    |

|           |                |                |        |
|-----------|----------------|----------------|--------|
| CBX1      | NM_006807.3    | NM_006807.3    | 10951  |
| LOC641978 | XM_935752.1    | XM_935752.1    | 641978 |
| LOC653158 | XM_926814.1    | XM_926814.1    | 653158 |
| FLJ38717  | NM_001004322.1 | NM_001004322.1 | 401261 |
| CLEC4E    | NM_014358.2    | NM_014358.2    | 26253  |
| C20ORF43  | NM_016407.1    | NM_016407.1    | 51507  |
| PRKY      | NM_002760.3    | NM_002760.3    | 5616   |
| TLR2      | NM_003264.3    | NM_003264.3    | 7097   |
| MCART1    | NM_033412.1    | NM_033412.1    | 92014  |
| NFKBIA    | NM_020529.1    | NM_020529.1    | 4792   |
| LRRN3     | NM_018334.3    | NM_018334.3    | 54674  |
| SLC26A8   | NM_052961.2    | NM_052961.2    | 116369 |
| HECW2     | NM_020760.1    | NM_020760.1    | 57520  |
| TMSB4Y    | NM_004202.2    | NM_004202.2    | 9087   |
| LOC653596 | XM_934651.1    | XM_934651.1    | 653596 |
| MPPE1     | NM_023075.4    | NM_023075.4    | 65258  |
| LRRK2     | NM_198578.2    | NM_198578.2    | 120892 |
| TAP2      | NM_000544.3    | NM_000544.3    | 6891   |
| FLJ40722  | XM_942096.1    | XM_942096.1    | 285966 |
| IL18      | NM_001562.2    | NM_001562.2    | 3606   |
| PICALM    | NM_007166.2    | NM_007166.2    | 8301   |
| CHD7      | NM_017780.2    | NM_017780.2    | 55636  |
| CDH2      | NM_001792.2    | NM_001792.2    | 1000   |
| LOC440456 | XM_935186.1    | XM_935186.1    | 440456 |
| MGC12760  | XM_930480.1    | XM_930480.1    | 84809  |
| PPP1R3D   | NM_006242.3    | NM_006242.3    | 5509   |
| OSBPL8    | NM_001003712.1 | NM_001003712.1 | 114882 |
| SLC25A20  | XM_001133926.1 | XM_001133926.1 | 788    |
| IL8RB     | NM_001557.2    | NM_001557.2    | 3579   |
| ASB8      | NM_024095.3    | NM_024095.3    | 140461 |
| BTNL3     | NM_006707.2    | NM_006707.2    | 10917  |
| PNMA3     | NM_013364.3    | NM_013364.3    | 29944  |
| TUBA4A    | NM_006000.1    | NM_006000.1    | 7277   |
| DTX3L     | NM_138287.2    | NM_138287.2    | 151636 |
| LOC647389 | XM_936461.1    | XM_936461.1    | 647389 |
| OSBPL9    | NM_024586.3    | NM_024586.3    | 114883 |
| GPR84     | NM_020370.1    | NM_020370.1    | 53831  |
| SUMO1P1   | NR_002189.2    | NR_002189.2    | 391257 |
| LMOD3     | NM_198271.2    | NM_198271.2    | 56203  |
| TGM3      | NM_003245.2    | NM_003245.2    | 7053   |
| NOV       | NM_002514.2    | NM_002514.2    | 4856   |
| ALS2CR14  | NM_178231.1    | NM_178231.1    | 65068  |
| ADD3      | NM_016824.3    | NM_016824.3    | 120    |
| CEP63     | NM_025180.3    | NM_025180.3    | 80254  |
| CXCL1     | NM_001511.1    | NM_001511.1    | 2919   |
| LINS1     | NM_001040616.1 | NM_001040616.1 | 55180  |
| LOC441193 | NM_001013722.1 | NM_001013722.1 | 441193 |
| PSIP1     | NM_033222.2    | NM_033222.2    | 11168  |



|            |                |                |        |
|------------|----------------|----------------|--------|
| CBX3       | NM_016587.2    | NM_016587.2    | 11335  |
| CRISPLD2   | NM_031476.1    | NM_031476.1    | 83716  |
| LOC653105  | XM_931214.1    | XM_931214.1    | 653105 |
| CKAP4      | NM_006825.2    | NM_006825.2    | 10970  |
| DJ341D10.1 | NM_001007535.1 | NM_001007535.1 | 286453 |
| FBXL13     | NM_145032.2    | NM_145032.2    | 222235 |
| BTAF1      | NM_003972.2    | NM_003972.2    | 9044   |
| MLX        | NM_170607.2    | NM_170607.2    | 6945   |
| NPTN       | NM_012428.2    | NM_012428.2    | 27020  |
| LOC653604  | XM_497711.2    | XM_497711.2    | 653604 |
| COX7B      | NM_001866.2    | NM_001866.2    | 1349   |
| POU2F1     | NM_002697.2    | NM_002697.2    | 5451   |
| LOC729853  | XM_001134256.1 | XM_001134256.1 | 729853 |
| BMX        | NM_001721.4    | NM_001721.4    | 660    |
| MMP9       | NM_004994.2    | NM_004994.2    | 4318   |
| AYTL1      | NM_017839.3    | NM_017839.3    | 54947  |
| NCF2       | NM_000433.2    | NM_000433.2    | 4688   |
| TTY15      | NR_001545.1    | NR_001545.1    | 64595  |
| MAP4K4     | NM_145686.2    | NM_145686.2    | 9448   |
| ALOX5AP    | NM_001629.2    | NM_001629.2    | 241    |
| PSMB9      | NM_148954.2    | NM_148954.2    | 5698   |
| MCM8       | NM_182802.1    | NM_182802.1    | 84515  |
| SRPK1      | NM_003137.3    | NM_003137.3    | 6732   |
| CMTM2      | NM_144673.2    | NM_144673.2    | 146225 |
| MOSC1      | NM_022746.2    | NM_022746.2    | 64757  |
| IBRDC2     | NM_182757.2    | NM_182757.2    | 255488 |
| ANKRD22    | NM_144590.1    | NM_144590.1    | 118932 |
| CUGBP2     | NM_001025077.1 | NM_001025077.1 | 10659  |
| LOC648226  | XM_938919.1    | XM_938919.1    | 648226 |
| S100P      | NM_005980.2    | NM_005980.2    | 6286   |
| PSG9       | NM_002784.2    | NM_002784.2    | 5678   |
| BRWD1      | NM_033656.2    | NM_033656.2    | 54014  |
| ABTB1      | NM_172027.1    | NM_172027.1    | 80325  |
| SLC36A4    | NM_152313.2    | NM_152313.2    | 120103 |
| ZNF281     | NM_012482.3    | NM_012482.3    | 23528  |
| C1ORF108   | NM_024595.1    | NM_024595.1    | 79647  |
| ANP32A     | NM_006305.2    | NM_006305.2    | 8125   |
| LOC388789  | XM_939954.2    | XM_939954.2    | 388789 |
| ABAT       | NM_020686.4    | NM_020686.4    | 18     |
| ZNF486     | XM_371152.3    | XM_371152.3    | 90649  |
| CHD8       | NM_020920.2    | NM_020920.2    | 57680  |
| KIAA0492   | XM_944290.2    | XM_944290.2    | 57238  |
| MGC4093    | NM_030578.2    | NM_030578.2    | 80776  |
| ANXA11     | NM_145869.1    | NM_145869.1    | 311    |
| PADI4      | NM_012387.1    | NM_012387.1    | 23569  |
| KIAA0319L  | NM_182686.1    | NM_182686.1    | 79932  |
| TDRD1      | NM_198795.1    | NM_198795.1    | 56165  |
| ARID4A     | NM_023001.2    | NM_023001.2    | 5926   |

|           |                |                |        |
|-----------|----------------|----------------|--------|
| SLC5A8    | NM_145913.2    | NM_145913.2    | 160728 |
| FLJ20152  | NM_019000.3    | NM_019000.3    | 54463  |
| FLJ14107  | XR_017962.1    | XR_017962.1    | 80094  |
| KIAA1706  | NM_030636.2    | NM_030636.2    | 80820  |
| PIP5K2B   | NM_138687.1    | NM_138687.1    | 8396   |
| RAB35     | NM_006861.4    | NM_006861.4    | 11021  |
| AHR       | NM_001621.2    | NM_001621.2    | 196    |
| ZSWIM1    | NM_080603.3    | NM_080603.3    | 90204  |
| ANKDD1A   | NM_182703.3    | NM_182703.3    | 348094 |
| SP110     | NM_080424.1    | NM_080424.1    | 3431   |
| CORO2A    | NM_003389.2    | NM_003389.2    | 7464   |
| LOC653086 | XM_930995.1    | XM_930995.1    | 653086 |
| IL9R      | NM_002186.2    | NM_002186.2    | 3581   |
| C21ORF55  | NM_017833.2    | NM_017833.2    | 54943  |
| PLAGL1    | NM_001080951.1 | NM_001080951.1 | 5325   |
| ZNF223    | NM_013361.2    | NM_013361.2    | 7766   |
| GTF2IP1   | NR_002206.1    | NR_002206.1    | 2970   |
| HS.16587  | Hs.16587       | Hs.16587       | NA     |
| HS.550293 | Hs.550293      | Hs.550293      | NA     |
| HS.257589 | Hs.257589      | Hs.257589      | NA     |
| HS.371006 | Hs.371006      | Hs.371006      | NA     |
| HS.38775  | Hs.38775       | Hs.38775       | NA     |
| HS.36034  | Hs.36034       | Hs.36034       | NA     |
| HS.544709 | Hs.544709      | Hs.544709      | NA     |
| HS.569948 | Hs.569948      | Hs.569948      | NA     |
| HS.575457 | Hs.575457      | Hs.575457      | NA     |
| HS.162932 | Hs.162932      | Hs.162932      | NA     |
| HS.136423 | Hs.136423      | Hs.136423      | NA     |
| HS.157344 | Hs.157344      | Hs.157344      | NA     |
| HS.547856 | Hs.547856      | Hs.547856      | NA     |
| HS.577681 | Hs.577681      | Hs.577681      | NA     |
| HS.148238 | Hs.148238      | Hs.148238      | NA     |
| HS.133261 | Hs.133261      | Hs.133261      | NA     |
| HS.537137 | Hs.537137      | Hs.537137      | NA     |
| HS.574671 | Hs.574671      | Hs.574671      | NA     |
| HS.389491 | Hs.389491      | Hs.389491      | NA     |
| HS.369643 | Hs.369643      | Hs.369643      | NA     |
| HS.374460 | Hs.374460      | Hs.374460      | NA     |
| HS.563172 | Hs.563172      | Hs.563172      | NA     |
| HS.441953 | Hs.441953      | Hs.441953      | NA     |
| HS.161796 | Hs.161796      | Hs.161796      | NA     |
| HS.540965 | Hs.540965      | Hs.540965      | NA     |
| HS.564874 | Hs.564874      | Hs.564874      | NA     |
| HS.545935 | Hs.545935      | Hs.545935      | NA     |
| HS.470701 | Hs.470701      | Hs.470701      | NA     |
| HS.520349 | Hs.520349      | Hs.520349      | NA     |
| HS.560503 | Hs.560503      | Hs.560503      | NA     |
| HS.441660 | Hs.441660      | Hs.441660      | NA     |

|           |             |             |    |
|-----------|-------------|-------------|----|
| HS.66290  | Hs.66290    | Hs.66290    | NA |
| HS.520591 | Hs.520591   | Hs.520591   | NA |
| HS.569303 | Hs.569303   | Hs.569303   | NA |
| HS.546105 | Hs.546105   | Hs.546105   | NA |
| HS.283402 | Hs.283402   | Hs.283402   | NA |
| HS.144312 | Hs.144312   | Hs.144312   | NA |
| HS.575034 | Hs.575034   | Hs.575034   | NA |
| HS.103173 | Hs.103173   | Hs.103173   | NA |
| HS.101139 | Hs.101139   | Hs.101139   | NA |
| HS.482960 | Hs.482960   | Hs.482960   | NA |
| HS.571741 | Hs.571741   | Hs.571741   | NA |
| HS.538918 | Hs.538918   | Hs.538918   | NA |
| HS.370503 | Hs.370503   | Hs.370503   | NA |
| HS.562530 | Hs.562530   | Hs.562530   | NA |
| HS.352677 | Hs.352677   | Hs.352677   | NA |
| HS.213474 | Hs.213474   | Hs.213474   | NA |
| HS.559770 | Hs.559770   | Hs.559770   | NA |
| HS.564915 | Hs.564915   | Hs.564915   | NA |
| HS.282467 | Hs.282467   | Hs.282467   | NA |
| HS.259391 | Hs.259391   | Hs.259391   | NA |
| HS.561570 | Hs.561570   | Hs.561570   | NA |
| HS.443534 | Hs.443534   | Hs.443534   | NA |
| HS.541035 | Hs.541035   | Hs.541035   | NA |
| HS.562352 | Hs.562352   | Hs.562352   | NA |
| HS.552324 | Hs.552324   | Hs.552324   | NA |
| HS.573262 | Hs.573262   | Hs.573262   | NA |
| HS.447737 | Hs.447737   | Hs.447737   | NA |
| HS.22689  | Hs.22689    | Hs.22689    | NA |
| HS.339693 | Hs.339693   | Hs.339693   | NA |
| HS.452445 | Hs.452445   | Hs.452445   | NA |
| HS.570343 | Hs.570343   | Hs.570343   | NA |
| HS.467627 | Hs.467627   | Hs.467627   | NA |
| HS.130036 | Hs.130036   | Hs.130036   | NA |
| HS.572444 | Hs.572444   | Hs.572444   | NA |
| HS.582113 | Hs.582113   | Hs.582113   | NA |
| HS.490981 | Hs.490981   | Hs.490981   | NA |
| HS.559604 | Hs.559604   | Hs.559604   | NA |
| HS.163752 | Hs.163752   | Hs.163752   | NA |
| HS.582263 | Hs.582263   | Hs.582263   | NA |
| HS.571151 | Hs.571151   | Hs.571151   | NA |
| HS.437283 | Hs.437283   | Hs.437283   | NA |
| HS.131087 | Hs.131087   | Hs.131087   | NA |
| TXN       | NM_003329.1 | NM_003329.1 | NA |

| GI       | Accession      | Symbol    | Protein_Product | Array_Address_Id | Probe_Type | Probe_Start |
|----------|----------------|-----------|-----------------|------------------|------------|-------------|
| 89025054 | XM_933516.1    | LOC643862 | XP_938609.1     | 3610465          | I          | 3261        |
| 88998653 | XM_936105.1    | LOC642035 | XP_941198.1     | 360128           | S          | 3           |
| 89027574 | XM_935575.1    | LOC641825 | XP_940668.1     | 3180246          | S          | 121         |
| 89037316 | XM_378454.3    | LOC283547 | XP_378454.2     | 870575           | A          | 4193        |
| 89028557 | XM_943677.1    | LOC654053 | XP_948770.1     | 7400592          | S          | 941         |
| 1.13E+08 | XM_933693.2    | LOC440731 | XP_938786.2     | 270768           | A          | 111         |
| 89037157 | XM_943048.1    | LOC647834 | XP_948141.1     | 2600669          | S          | 2498        |
| 89036737 | XR_000601.1    | FLJ37307  |                 | 5490440          | A          | 3986        |
| 89040587 | XM_941963.1    | LOC649754 | XP_947056.1     | 70041            | A          | 190         |
| 89025371 | XM_930545.1    | FLJ43663  | XP_935638.1     | 3930180          | A          | 1437        |
| 88988357 | XR_001261.1    | FLJ12078  |                 | 7150039          | A          | 2413        |
| 1.13E+08 | XM_370932.4    | FLJ39639  | XP_370932.2     | 5420452          | A          | 2341        |
| 77020264 | NR_002569.1    | SCARNA9   |                 | 840639           | S          | 46          |
| 6991367  | AW450591       |           |                 | 1340204          | S          | 246         |
| 10439674 | AK026751       |           |                 | 4180274          | S          | 757         |
| 41120019 | XM_374029      |           |                 | 1710411          | S          | 382         |
| 30023571 | AF452720       |           |                 | 1110309          | S          | 822         |
| 10438414 | AK025793       |           |                 | 3990600          | S          | 3313        |
| 30047319 | CB852325       |           |                 | 4610437          | S          | 475         |
| 15345167 | BI520375       |           |                 | 4260639          | S          | 351         |
| 51468125 | XM_498474      |           |                 | 2030673          | S          | 1607        |
| 27845617 | BX103256       |           |                 | 2760114          | S          | 199         |
| 34528764 | AK123264       |           |                 | 6270605          | S          | 2211        |
| 4507744  | NM_003329.1    | TXN       |                 | 4260048          | S          | 72          |
| 71565158 | NM_001031.4    | RPS28     | NP_001022.1     | 7510672          | S          | 329         |
| 9790905  | NM_006705.2    | GADD45G   | NP_006696.1     | 70376            | S          | 923         |
| 71482588 | NM_001020.4    | RPS16     | NP_001011.1     | 130768           | S          | 496         |
| 66529092 | NM_001023587.1 | ABCC5     | NP_001018881.1  | 7610097          | I          | 1804        |
| 89941472 | NM_001017998.2 | GNG10     | NP_001017998.1  | 4590608          | S          | 292         |
| 31542670 | NM_018368.2    | LMBRD1    | NP_060838.2     | 4590301          | S          | 1576        |
| 1.13E+08 | XM_936430.2    | LOC647361 | XP_941523.1     | 3870088          | S          | 27          |
| 22095361 | NM_022343.2    | C9orf19   | NP_071738.1     | 4280253          | S          | 1778        |
| 56243494 | NM_004586.2    | RPS6KA3   | NP_004577.1     | 5890647          | I          | 7247        |
| 20127653 | NM_032753.2    | RAXL1     | NP_116142.1     | 3830382          | S          | 2182        |
| 1.13E+08 | XM_372345.3    | LOC390033 | XP_372345.3     | 2140537          | S          | 108         |
| 1.11E+08 | NM_005746.2    | PBEF1     | NP_005737.1     | 3800243          | I          | 1544        |
| 89036604 | XM_929199.1    | LOC644250 | XP_934292.1     | 940386           | S          | 259         |
| 13994299 | NM_031925.1    | TMPIT     | NP_114131.1     | 5560577          | S          | 1055        |
| 53729348 | NM_002658.2    | PLAU      | NP_002649.1     | 1740349          | S          | 2049        |
| 32967585 | NM_181897.1    | PPP2R3A   | NP_871626.1     | 540041           | A          | 4082        |
| 55742692 | NM_024646.1    | ZYG11B    | NP_078922.1     | 4610019          | S          | 6333        |
| 67782352 | NM_002231.3    | CD82      | NP_002222.1     | 6770594          | A          | 1323        |
| 62422568 | NM_006234.4    | POLR2J    | NP_006225.1     | 4810594          | S          | 627         |
| 51972191 | NM_001004305.1 | LOC284757 | NP_001004305.1  | 870349           | S          | 4094        |
| 62988329 | NM_014809.2    | KIAA0319  | NP_055624.1     | 5910102          | S          | 6659        |
| 32528294 | NM_004755.2    | RPS6KA5   | NP_004746.2     | 2030482          | I          | 3521        |
| 1.23E+08 | NM_001080497.1 | MEGF9     | NP_001073966.1  | 7560615          | A          | 857         |

|          |                |            |                |         |   |      |
|----------|----------------|------------|----------------|---------|---|------|
| 1.13E+08 | XM_934218.2    | LOC644852  | XP_939311.1    | 2360053 | I | 879  |
| 1.13E+08 | XR_017611.1    | LOC653635  |                | 3990128 | S | 2595 |
| 21328454 | NM_003516.2    | HIST2H2AA3 | NP_003507.1    | 1030039 | S | 1    |
| 21362103 | NM_032731.2    | TXNL5      | NP_116120.1    | 830047  | S | 378  |
| 88983545 | XM_926814.1    | LOC653158  | XP_931907.1    | 5820682 | I | 2213 |
| 88971807 | XM_936511.1    | PAK2       | XP_941604.1    | 6110608 | I | 1688 |
| 68160923 | NM_001030.3    | RPS27      | NP_001021.1    | 5290523 | S | 36   |
| 50541962 | NM_001002292.1 | GPR177     | NP_001002292.1 | 540288  | I | 1848 |
| 89040118 | XM_934316.1    | LOC653352  | XP_939409.1    | 4540653 | I | 2039 |
| 27437033 | NM_172246.1    | CSF2RA     | NP_758449.1    | 4570168 | A | 1147 |
| 1.13E+08 | XM_941267.2    | LOC646424  | XP_946360.1    | 520209  | S | 189  |
| 37574604 | NM_003453.2    | ZMYM2      | NP_003444.1    | 6040079 | A | 4512 |
| 31542241 | NM_017917.2    | PPP2R3C    | NP_060387.2    | 2760110 | S | 1264 |
| 7657135  | NM_014373.1    | GPR160     | NP_055188.1    | 6180427 | S | 1437 |
| 8922900  | NM_018340.1    | FLJ11151   | NP_060810.1    | 7550519 | S | 2496 |
| 23957679 | NM_153615.1    | Rgr        | NP_705843.1    | 3440253 | S | 2648 |
| 32129213 | NM_019065.2    | EFCBP2     | NP_061938.2    | 6770669 | S | 1468 |
| 53832004 | NM_000721.2    | CACNA1E    | NP_000712.2    | 2760452 | S | 9561 |
| 91199539 | NM_000108.3    | DLD        | NP_000099.2    | 1690671 | S | 1675 |
| 16936537 | NM_005148.2    | UNC119     | NP_005139.1    | 1570164 | A | 1267 |
| 88943484 | XM_497711.2    | LOC653604  | XP_497711.2    | 6650593 | S | 133  |
| 1.17E+08 | NM_016056.2    | TMBIM4     | NP_057140.2    | 5270356 | S | 610  |
| 58331181 | NM_015626.8    | WSB1       | NP_056441.6    | 6650575 | A | 2671 |
| 24308302 | NM_030645.1    | SH3BP5L    | NP_085148.1    | 7320112 | S | 2889 |
| 14149626 | NM_006313.1    | USP15      | NP_006304.1    | 70767   | S | 4159 |
| 41203895 | XM_372521.1    | LOC390466  | XP_372521.1    | 6130672 | S | 61   |
| 61743931 | NM_022476.2    | AKTIP      | NP_071921.1    | 2360414 | A | 1431 |
| 30794215 | NM_030961.1    | TRIM56     | NP_112223.1    | 1780647 | S | 3115 |
| 5174422  | NM_006023.1    | CDC123     | NP_006014.1    | 6110379 | S | 1191 |
| 19923351 | NM_006167.2    | NKX3-1     | NP_006158.2    | 4670735 | S | 2969 |
| 12232394 | NM_022737.1    | LPPR2      | NP_073574.1    | 3140274 | S | 2354 |
| 38327657 | NM_198596.1    | SULF2      | NP_940998.1    | 5270762 | A | 3335 |
| 55953128 | NM_001550.2    | IFRD1      | NP_001541.2    | 3780243 | A | 1957 |
| 1.13E+08 | XM_001128769.1 | LOC728825  | XP_001128769.1 | 3060348 | S | 35   |
| 19387853 | NM_032536.1    | NTNG2      | NP_115925.1    | 6270382 | S | 2101 |
| 88959061 | XM_937277.1    | LOC391475  | XP_942370.1    | 2630253 | A | 601  |
| 72534731 | NM_001031719.1 | DHRS12     | NP_001026889.1 | 4890114 | A | 562  |
| 24429563 | NM_002604.1    | PDE7A      | NP_002595.1    | 6960221 | I | 2530 |
| 4505226  | NM_002432.1    | MNDA       | NP_002423.1    | 6380228 | S | 1318 |
| 1.18E+08 | NM_005224.2    | ARID3A     | NP_005215.1    | 4260446 | S | 2546 |
| 54291711 | NM_001005852.1 | CYorf15A   | NP_001005852.1 | 2190192 | S | 1688 |
| 40068058 | NM_004882.3    | CIR        | NP_004873.3    | 2640088 | A | 1294 |
| 1.15E+08 | NM_001048210.1 | CLCC1      | NP_001041675.1 | 20674   | S | 4235 |
| 22035666 | NM_005749.2    | TOB1       | NP_005740.1    | 2470477 | S | 892  |
| 17986251 | NM_004510.2    | SP110      | NP_004501.2    | 70338   | A | 1274 |
| 27436949 | NM_005573.2    | LMNB1      | NP_005564.1    | 4900048 | S | 2443 |
| 34577051 | NM_005242.3    | F2RL1      | NP_005233.3    | 5690201 | S | 2245 |
| 89063135 | XM_942097.1    | LOC652578  | XP_947190.1    | 3180192 | S | 537  |

|          |                |           |                |         |   |      |
|----------|----------------|-----------|----------------|---------|---|------|
| 8923529  | NM_017881.1    | C9orf95   | NP_060351.1    | 7320079 | S | 1013 |
| 56786142 | NM_016245.2    | HSD17B11  | NP_057329.1    | 2190475 | I | 465  |
| 61966904 | NM_001013725.1 | LOC441268 | NP_001013747.1 | 3840102 | S | 2048 |
| 5174678  | NM_006065.1    | SIRPB1    | NP_006056.1    | 1570402 | S | 3692 |
| 4557879  | NM_000416.1    | IFNGR1    | NP_000407.1    | 1500446 | S | 1771 |
| 88943153 | XM_934022.1    | NBPF9     | XP_939115.1    | 6270324 | I | 582  |
| 8923664  | NM_017949.1    | CUEDC1    | NP_060419.1    | 2680725 | S | 2114 |
| 56549635 | NM_001008491.1 | Septin 2  | NP_001008491.1 | 780431  | I | 352  |
| 37577120 | NM_080387.4    | CLEC4D    | NP_525126.2    | 3990328 | S | 1551 |
| 1.13E+08 | XR_016005.1    | LOC731706 |                | 4180564 | S | 466  |
| 4506264  | NM_000963.1    | PTGS2     | NP_000954.1    | 1470682 | S | 3943 |
| 96975134 | NM_130781.2    | RAB24     | NP_570137.2    | 4730156 | A | 1124 |
| 1.16E+08 | NM_007288.2    | MME       | NP_009219.2    | 240608  | A | 5051 |
| 56550123 | NM_016327.2    | UPB1      | NP_057411.1    | 7160367 | S | 1915 |
| 21327700 | NM_139215.1    | TAF15     | NP_631961.1    | 5960128 | A | 1913 |
| 34850482 | NR_001568.1    | BCYRN1    |                | 2450154 | S | 57   |
| 38373676 | NM_198679.1    | RAPGEF1   | NP_941372.1    | 6100576 | I | 65   |
| 17865815 | NM_078488.1    | VNN2      | NP_511043.1    | 5570673 | A | 1770 |
| 50363225 | NM_052863.2    | SCGB3A1   | NP_443095.2    | 2060543 | S | 221  |
| 1.13E+08 | XM_941155.2    | LOC651894 | XP_946248.1    | 1570750 | S | 7    |
| 34147686 | NM_018561.3    | USP49     | NP_061031.2    | 7320088 | S | 2818 |
| 50592993 | NM_003329.2    | TXN       | NP_003320.2    | 830762  | S | 43   |
| 21359910 | NM_016361.2    | ACP6      | NP_057445.2    | 3180376 | S | 1595 |
| 89040641 | XM_944417.1    | LOC650919 | XP_949510.1    | 4250543 | S | 1385 |
| 47157329 | NM_004157.2    | PRKAR2A   | NP_004148.1    | 4900593 | S | 2304 |
| 20149601 | NM_012229.2    | NT5C2     | NP_036361.1    | 520647  | S | 3272 |
| 33149315 | NM_181889.1    | UBE2D3    | NP_871618.1    | 4640110 | A | 2052 |
| 1.24E+08 | NM_002586.4    | PBX2      | NP_002577.2    | 5550500 | S | 3106 |
| 64762405 | NM_006212.2    | PFKFB2    | NP_006203.2    | 3190326 | I | 6815 |
| 22749366 | NM_152680.1    | TMEM154   | NP_689893.1    | 7650379 | S | 2498 |
| 47575843 | NM_015335.2    | THRAP2    | NP_056150.1    | 1990332 | S | 9174 |
| 1.19E+08 | NM_177924.2    | ASAH1     | NP_808592.1    | 840161  | I | 261  |
| 40807490 | NM_001995.2    | ACSL1     | NP_001986.2    | 4880717 | S | 3553 |
| 42560239 | NM_002785.2    | PSG11     | NP_002776.2    | 3400292 | I | 413  |
| 29789109 | NM_020698.1    | TMCC3     | NP_065749.1    | 2650152 | S | 4505 |
| 1.18E+08 | NR_003260.1    | C15orf51  |                | 5910131 | I | 3782 |
| 40317625 | NM_003246.2    | THBS1     | NP_003237.2    | 5910376 | S | 4947 |
| 38679889 | NM_180991.4    | SLCO4C1   | NP_851322.3    | 770717  | S | 4454 |
| 11024697 | NM_012215.1    | MGEA5     | NP_036347.1    | 1010402 | S | 4955 |
| 19923769 | NM_021958.2    | HLX1      | NP_068777.1    | 1400706 | S | 1612 |
| 38327656 | NM_018837.2    | SULF2     | NP_061325.1    | 1850056 | I | 2862 |
| 31543547 | NM_016090.2    | RBM7      | NP_057174.1    | 5390326 | S | 1656 |
| 94538326 | NM_002038.3    | IFI6      | NP_002029.3    | 4390176 | A | 743  |
| 1.13E+08 | XM_941155.2    | LOC651894 | XP_946248.1    | 5130273 | S | 131  |
| 88947652 | XM_944915.1    | PTP4A2    | XP_950008.1    | 5360603 | I | 2364 |
| 39753969 | NM_004345.3    | CAMP      | NP_004336.2    | 6400736 | S | 644  |
| 21166386 | NM_003524.2    | HIST1H2BH | NP_003515.1    | 5720433 | S | 352  |
| 7706185  | NM_016639.1    | TNFRSF12A | NP_057723.1    | 2190008 | S | 634  |

|          |                |           |                |         |   |      |
|----------|----------------|-----------|----------------|---------|---|------|
| 22748622 | NM_152266.1    | C19orf40  | NP_689479.1    | 7150189 | S | 676  |
| 58219057 | NM_001010915.1 | PTPLAD2   | NP_001010915.1 | 1470091 | S | 3665 |
| 21536300 | NM_139266.1    | STAT1     | NP_644671.1    | 3190133 | I | 2595 |
| 1.13E+08 | XM_001134072.1 | PSMD12    | XP_001134072.1 | 1440131 | I | 2849 |
| 53829378 | NM_001005376.1 | PLAUR     | NP_001005376.1 | 6130594 | I | 1107 |
| 89039665 | XM_933375.1    | LOC646064 | XP_938468.1    | 2450014 | S | 1382 |
| 56788410 | NM_001008699.1 | IL4R      | NP_001008699.1 | 1770678 | I | 962  |
| 38045951 | NM_021030.2    | ZNF14     | NP_066358.2    | 2340674 | S | 2358 |
| 5031608  | NM_005881.1    | BCKDK     | NP_005872.1    | 5390056 | S | 1742 |
| 31563433 | NM_181301.1    | CMTM1     | NP_851818.1    | 4830017 | A | 704  |
| 94721245 | NM_001632.3    | ALPP      | NP_001623.3    | 4230088 | S | 2672 |
| 9790904  | NM_001924.2    | GADD45A   | NP_001915.1    | 3140239 | S | 659  |
| 12545396 | NM_022308.1    | ICA1      | NP_071683.1    | 6560411 | I | 543  |
| 1.09E+08 | NM_007098.2    | CLTCL1    | NP_009029.2    | 5090026 | I | 4593 |
| 71772593 | NM_001032.3    | RPS29     | NP_001023.1    | 1990753 | A | 63   |
| 88943486 | XM_928387.1    | LOC653610 | XP_933480.1    | 5670544 | S | 713  |
| 33188448 | NM_182692.1    | SRPK2     | NP_872634.1    | 2350072 | I | 107  |
| 47717135 | NM_020666.2    | CLK4      | NP_065717.1    | 6510110 | S | 2086 |
| 1.13E+08 | XR_019071.1    | LOC642333 |                | 1010296 | A | 611  |
| 1.16E+08 | NM_000902.3    | MME       | NP_000893.2    | 2360400 | I | 28   |
| 71037378 | NM_002863.3    | PYGL      | NP_002854.3    | 4610113 | S | 2494 |
| 17572806 | NM_031916.2    | ROPN1L    | NP_114122.2    | 1050240 | S | 740  |
| 38327621 | NM_007005.3    | TLE4      | NP_008936.2    | 6290170 | S | 4048 |
| 19923332 | NM_005687.2    | FARSLB    | NP_005678.2    | 460128  | S | 2992 |
| 1.13E+08 | XM_938906.2    | LOC649841 | XP_943999.2    | 4830300 | S | 644  |
| 63054841 | NM_001017431.1 | RBM3      | NP_001017431.1 | 7380612 | A | 346  |
| 1.13E+08 | XR_017837.1    | LOC440926 |                | 4590593 | A | 143  |
| 53759100 | NM_001548.2    | IFIT1     | NP_001539.2    | 6220673 | I | 108  |
| 89027425 | XM_935827.1    | LOC442609 | XP_940920.1    | 5360300 | A | 2603 |
| 74319832 | NM_004654.3    | USP9Y     | NP_004645.2    | 6290398 | S | 9257 |
| 1.13E+08 | XR_018616.1    | LOC400721 |                | 5890162 | S | 5744 |
| 37675384 | NM_197953.1    | CLEC7A    | NP_922944.1    | 1090170 | A | 43   |
| 91208440 | NM_003864.3    | SAP30     | NP_003855.1    | 2510133 | S | 873  |
| 33188426 | NM_182659.1    | UTY       | NP_872600.1    | 5310196 | I | 4730 |
| 94538348 | NM_053024.3    | PFN2      | NP_444252.1    | 4210246 | I | 620  |
| 70167417 | NM_002357.2    | MXD1      | NP_002348.1    | 2260239 | S | 5318 |
| 7705854  | NM_016142.1    | HSD17B12  | NP_057226.1    | 3290411 | S | 1747 |
| 54607092 | NM_016047.3    | SF3B14    | NP_057131.1    | 1410315 | S | 199  |
| 89060764 | XM_937928.1    | LOC347376 | XP_943021.1    | 5900072 | A | 1    |
| 75905486 | NM_001033658.1 | LOC283152 | NP_001028830.1 | 4810324 | A | 314  |
| 62952497 | NM_020397.2    | CAMK1D    | NP_065130.1    | 3930653 | I | 1347 |
| 1.13E+08 | XR_017611.1    | LOC653635 |                | 2480278 | S | 2417 |
| 4506102  | NM_002759.1    | EIF2AK2   | NP_002750.1    | 1190349 | S | 2728 |
| 1.1E+08  | NM_018688.4    | BIN3      | NP_061158.1    | 7550392 | S | 1578 |
| 29550859 | NM_022130.3    | GOLPH3    | NP_071413.1    | 4780114 | S | 2120 |
| 50511938 | NM_001002269.1 | EXOSC3    | NP_001002269.1 | 1980743 | A | 721  |
| 59933283 | NM_001012391.1 | RUNDC2B   | NP_001012391.1 | 4780064 | I | 1140 |
| 89028499 | XM_942939.1    | LOC647499 | XP_948032.1    | 6560128 | I | 589  |

|          |                |              |                |         |   |       |
|----------|----------------|--------------|----------------|---------|---|-------|
| 1.13E+08 | XM_927706.2    | LOC644591    | XP_932799.1    | 1510196 | S | 3719  |
| 4506516  | NM_002923.1    | RGS2         | NP_002914.1    | 5690500 | S | 865   |
| 88953414 | XM_934113.1    | LOC653489    | XP_939206.1    | 3890053 | I | 5975  |
| 89028131 | XM_928866.1    | LOC645895    | XP_933959.1    | 7570673 | S | 83    |
| 4758439  | NM_004877.1    | GMFG         | NP_004868.1    | 4250452 | S | 469   |
| 89059772 | XM_928047.1    | LOC644969    | XP_933140.1    | 2600187 | S | 1     |
| 10092611 | NM_016326.2    | CKLF         | NP_057410.1    | 2000551 | A | 174   |
| 91598583 | NR_002949.1    | NUDT16P      |                | 6420402 | S | 1354  |
| 1.13E+08 | XM_927767.2    | LOC653505    | XP_932860.1    | 160494  | S | 3717  |
| 4505416  | NM_000904.1    | NQO2         | NP_000895.1    | 870400  | S | 621   |
| 74316007 | NM_022129.3    | PBLD         | NP_071412.2    | 1340474 | I | 2137  |
| 52352807 | NM_014624.3    | S100A6       | NP_055439.1    | 1500553 | S | 527   |
| 22748870 | NM_152411.1    | ZNF786       | NP_689624.1    | 4200541 | S | 3091  |
| 1.13E+08 | XM_001126665.1 | FAM101B      | XP_001126665.1 | 2350093 | S | 5     |
| 1.16E+08 | NM_182705.2    | FAM101B      | NP_874364.1    | 940246  | S | 292   |
| 37537688 | NM_005649.2    | ZNF354A      | NP_005640.2    | 2850670 | S | 2312  |
| 1.15E+08 | NM_002965.3    | S100A9       | NP_002956.1    | 830400  | S | 506   |
| 88957838 | XM_498571.2    | LOC440160    | XP_498571.2    | 1190731 | S | 115   |
| 55770901 | NM_024576.3    | OGFRL1       | NP_078852.3    | 2750315 | S | 1038  |
| 16418454 | NM_052960.1    | RBP7         | NP_443192.1    | 4810131 | S | 421   |
| 87080804 | NM_001039473.1 | C22orf34     | NP_001034562.1 | 5910682 | S | 1303  |
| 1.13E+08 | NM_002856.2    | PVRL2        | NP_002847.1    | 2570544 | S | 1789  |
| 21389514 | NM_144726.1    | FLJ31951     | NP_653327.1    | 2490437 | S | 2719  |
| 4809282  | NM_002108.2    | HAL          | NP_002099.1    | 6660327 | S | 2301  |
| 45430056 | NM_014960.2    | ARSG         | NP_055775.2    | 5420379 | S | 1739  |
| 1.19E+08 | NM_005153.2    | USP10        | NP_005144.2    | 1980021 | S | 2458  |
| 89060605 | XM_942501.1    | CSF2RA       | XP_947594.1    | 5340037 | I | 1791  |
| 40255228 | NM_032121.3    | DKFZp564K142 | NP_115497.3    | 5700139 | S | 2093  |
| 58331103 | NM_175876.3    | EXOC8        | NP_787072.2    | 5130491 | S | 4522  |
| 28559038 | NM_004774.2    | PPARBP       | NP_004765.2    | 6760373 | S | 5590  |
| 1.13E+08 | XM_001132265.1 | DHRS8        | XP_001132265.1 | 1570553 | A | 1604  |
| 1.13E+08 | XM_001127825.1 | LOC728575    | XP_001127825.1 | 5270575 | A | 224   |
| 31881791 | NM_181657.1    | LTB4R        | NP_858043.1    | 3120735 | S | 2942  |
| 40806188 | NM_000189.4    | HK2          | NP_000180.2    | 4760768 | S | 6532  |
| 58372151 | NM_001011538.1 | LOC402176    | NP_001011538.1 | 4050056 | S | 1350  |
| 38016936 | NM_014916.2    | LMTK2        | NP_055731.2    | 4050040 | S | 5327  |
| 5454101  | NM_006342.1    | TACC3        | NP_006333.1    | 2630544 | S | 2550  |
| 34098964 | NM_015364.2    | LY96         | NP_056179.1    | 6980474 | S | 505   |
| 37704380 | NM_004048.2    | B2M          | NP_004039.1    | 6290114 | S | 402   |
| 65507252 | NM_018169.2    | C12orf35     | NP_060639.2    | 3310446 | S | 5367  |
| 27735098 | NM_173497.1    | HECTD2       | NP_775768.1    | 2230408 | I | 1864  |
| 67782329 | NM_001024843.1 | TNRC6B       | NP_001020014.1 | 2600386 | A | 15415 |
| 55769563 | NM_003439.1    | ZKSCAN1      | NP_003430.1    | 1580187 | S | 5035  |
| 50355969 | NM_000570.2    | FCGR3B       | NP_000561.2    | 3990360 | S | 1450  |
| 59938775 | NM_001011666.1 | CREB5        | NP_001011666.1 | 4220026 | I | 40    |
| 94538364 | NM_014339.4    | IL17RA       | NP_055154.3    | 3870110 | S | 2932  |
| 19743913 | NM_130843.1    | PTPRN2       | NP_570858.1    | 6580717 | A | 4200  |
| 38176162 | NM_018434.4    | RNF130       | NP_060904.2    | 5670603 | S | 1503  |



|          |                |           |                |         |   |      |
|----------|----------------|-----------|----------------|---------|---|------|
| 50593000 | NM_003282.2    | TNNI2     | NP_003273.1    | 6350142 | S | 274  |
| 21614543 | NM_002964.3    | S100A8    | NP_002955.2    | 6280576 | S | 253  |
| 9257219  | NM_000804.2    | FOLR3     | NP_000795.2    | 2230601 | S | 759  |
| 71143157 | NM_001029862.1 | ANKRD30B  | NP_001025033.1 | 1690184 | I | 2942 |
| 34304373 | NM_003885.2    | CDK5R1    | NP_003876.1    | 770484  | S | 3133 |
| 41350336 | NM_003263.3    | TLR1      | NP_003254.2    | 5080398 | S | 2736 |
| 66529202 | NM_020954.2    | KIAA1618  | NP_066005.2    | 4570561 | I | 4774 |
| 78190467 | NM_000987.3    | RPL26     | NP_000978.1    | 2000025 | S | 57   |
| 40807473 | NM_000608.2    | ORM2      | NP_000599.1    | 6370202 | S | 473  |
| 55775476 | NM_014985.1    | CEP152    | NP_055800.1    | 3930370 | S | 4067 |
| 88986346 | XM_933119.1    | LOC653316 | XP_938212.1    | 7320170 | I | 1162 |
| 75813617 | NM_001033556.1 | PPM1B     | NP_001028728.1 | 3450026 | I | 1448 |
| 56550115 | NM_001300.4    | KLF6      | NP_001291.3    | 5260397 | I | 1330 |
| 29029598 | NM_006639.2    | CYSLTR1   | NP_006630.1    | 4810204 | S | 1218 |
| 89027700 | XM_927280.1    | LOC644033 | XP_932373.1    | 4290669 | S | 283  |
| 58761509 | NM_024640.3    | YRDC      | NP_078916.3    | 1340491 | S | 1263 |
| 4503240  | NM_000896.1    | CYP4F3    | NP_000887.1    | 650164  | S | 4625 |
| 54144630 | NM_030948.1    | PHACTR1   | NP_112210.1    | 3800095 | S | 1803 |
| 24308385 | NM_052937.1    | PCMTD1    | NP_443169.1    | 240037  | S | 3666 |
| 27734690 | NM_173669.1    | FLJ34047  | NP_775940.1    | 4850735 | S | 2829 |
| 71772593 | NM_001032.3    | RPS29     | NP_001023.1    | 5960026 | I | 194  |
| 8922429  | NM_018097.1    | CEP27     | NP_060567.1    | 3850524 | S | 1256 |
| 89050223 | XM_928041.1    | LOC644964 | XP_933134.1    | 70221   | S | 430  |
| 47078236 | NM_004486.4    | GOLGA2    | NP_004477.2    | 5390445 | S | 3921 |
| 89029829 | XM_928180.1    | LOC643284 | XP_933273.1    | 4230615 | S | 68   |
| 18375674 | NM_015542.2    | UPF2      | NP_056357.1    | 2230307 | I | 5    |
| 31455612 | NR_001445.1    | RN7SK     |                | 5080673 | S | 257  |
| 33188430 | NM_007125.3    | UTY       | NP_009056.3    | 5420224 | I | 6354 |
| 4505316  | NM_002480.1    | PPP1R12A  | NP_002471.1    | 4180280 | S | 4479 |
| 55743117 | NM_012233.1    | RAB3GAP1  | NP_036365.1    | 6330561 | S | 3989 |
| 39932582 | NM_017970.2    | C14orf102 | NP_060440.2    | 3140358 | I | 161  |
| 19743870 | NM_133279.1    | FCAR      | NP_579813.1    | 6860239 | I | 1361 |
| 45580712 | NM_130771.2    | OSCAR     | NP_570127.2    | 2190609 | A | 983  |
| 41393558 | NM_183416.2    | KIF1B     | NP_904325.2    | 3170719 | I | 5646 |
| 7662017  | NM_015153.1    | PHF3      | NP_055968.1    | 2510687 | S | 6079 |
| 89027419 | XM_935802.1    | LOC653829 | XP_940895.1    | 7100044 | A | 3711 |
| 88702790 | NM_002393.2    | MDM4      | NP_002384.2    | 4490671 | S | 2032 |
| 24475703 | NM_025209.2    | EPC1      | NP_079485.1    | 2680010 | S | 2756 |
| 62739174 | NM_003610.3    | RAE1      | NP_003601.1    | 4850138 | A | 1662 |
| 47933391 | NM_004288.3    | PSCDBP    | NP_004279.3    | 5390195 | S | 1719 |
| 89035399 | XM_931879.1    | LOC643882 | XP_936972.1    | 3180482 | S | 1616 |
| 38570153 | NM_012279.2    | ZNF346    | NP_036411.1    | 3420373 | S | 2662 |
| 31982907 | NM_130469.2    | JDP2      | NP_569736.1    | 3180379 | S | 1608 |
| 68226419 | NM_001024938.1 | SLC2A11   | NP_001020109.1 | 2750091 | A | 1397 |
| 58531218 | NM_001011547.1 | SLC5A9    | NP_001011547.1 | 70270   | S | 2889 |
| 1.13E+08 | XM_001128558.1 | LOC730740 | XP_001128558.1 | 4920408 | S | 228  |
| 5032058  | NM_005621.1    | S100A12   | NP_005612.1    | 10279   | S | 241  |
| 31377636 | NM_052862.2    | RCSD1     | NP_443094.2    | 3140280 | S | 2692 |

|          |                |           |                |         |   |       |
|----------|----------------|-----------|----------------|---------|---|-------|
| 27437033 | NM_172246.1    | CSF2RA    | NP_758449.1    | 4150246 | A | 1244  |
| 1.18E+08 | NR_003264.1    | SDHALP1   |                | 6420674 | I | 10150 |
| 46559738 | NM_207337.1    | AMN1      | NP_997220.1    | 3990719 | S | 1629  |
| 13194198 | NM_023003.1    | TM6SF1    | NP_075379.1    | 10541   | S | 964   |
| 13129023 | NM_024054.1    | C7orf25   | NP_076959.1    | 4570397 | S | 1351  |
| 1.13E+08 | XM_371820.5    | FLJ90086  | XP_371820.5    | 5050181 | A | 4017  |
| 52851404 | NM_003898.2    | SYNJ2     | NP_003889.1    | 5900592 | S | 6404  |
| 4507284  | NM_003765.1    | STX10     | NP_003756.1    | 3190681 | S | 685   |
| 62865648 | NM_001017368.1 | RFFL      | NP_001017368.1 | 5870551 | A | 3411  |
| 21361994 | NM_024876.2    | ADCK4     | NP_079152.3    | 1690221 | S | 1907  |
| 68160936 | NM_005082.4    | TRIM25    | NP_005073.2    | 2850576 | S | 5462  |
| 24233529 | NM_153697.1    | ANKRD44   | NP_710181.1    | 4730377 | S | 2988  |
| 41393567 | NM_014320.2    | HEBP2     | NP_055135.1    | 5090184 | S | 804   |
| 65287716 | NM_001013703.2 | EIF2AK4   | NP_001013725.2 | 3370471 | S | 5290  |
| 78190459 | NM_000978.3    | RPL23     | NP_000969.1    | 4120707 | S | 321   |
| 50355980 | NM_032576.2    | CYorf15B  | NP_115965.1    | 4730458 | S | 4976  |
| 88987903 | XM_936748.1    | LOC647691 | XP_941841.1    | 2970600 | S | 3     |
| 23510443 | NM_006573.3    | TNFSF13B  | NP_006564.1    | 460608  | S | 634   |
| 22219473 | NM_003824.2    | FADD      | NP_003815.1    | 1940035 | S | 1558  |
| 56682942 | NM_130782.2    | RGS18     | NP_570138.1    | 1240438 | S | 1787  |
| 73747916 | NM_018833.2    | TAP2      | NP_061313.2    | 1780528 | A | 1448  |
| 31543155 | NM_032882.2    | PNMA6A    | NP_116271.1    | 6760270 | S | 1892  |
| 89047114 | XM_928156.1    | LOC643509 | XP_933249.1    | 70286   | A | 2564  |
| 45935370 | NM_002727.2    | SRGN      | NP_002718.2    | 650541  | S | 482   |
| 22538469 | NM_005442.2    | EOMES     | NP_005433.2    | 6760075 | S | 2643  |
| 23110934 | NM_148976.1    | PSMA1     | NP_683877.1    | 20451   | I | 233   |
| 46389561 | NM_207168.1    | ENSA      | NP_997051.1    | 1110685 | A | 236   |
| 13376242 | NM_024834.1    | C10orf119 | NP_079110.1    | 4830192 | S | 4030  |
| 31077212 | NM_001530.2    | HIF1A     | NP_001521.1    | 2850288 | I | 2496  |
| 61742780 | NM_019610.3    | RBMXL1    | NP_062556.2    | 5080093 | S | 3210  |
| 20070234 | NM_006495.2    | EVI2B     | NP_006486.2    | 2030593 | S | 1401  |
| 38683859 | NM_003749.2    | IRS2      | NP_003740.2    | 6980095 | S | 6369  |
| 4502094  | NM_001150.1    | ANPEP     | NP_001141.1    | 1770605 | S | 3149  |
| 1.13E+08 | XM_001131044.1 | MBOAT1    | XP_001131044.1 | 5810731 | A | 2451  |
| 13259519 | NM_006037.2    | HDAC4     | NP_006028.1    | 5960341 | S | 8280  |
| 40217797 | NM_152655.2    | ZNF585A   | NP_689868.1    | 460504  | I | 5     |
| 1.16E+08 | NM_148962.4    | OXER1     | NP_683765.1    | 510491  | S | 1501  |
| 85838510 | NM_006609.3    | MAP3K2    | NP_006600.3    | 2320296 | A | 3192  |
| 58331201 | NM_001010935.1 | RAP1A     | NP_001010935.1 | 3060692 | I | 188   |
| 21361096 | NM_004125.2    | LOC552891 | NP_004116.2    | 5820176 | S | 337   |
| 55741708 | NM_021239.1    | RBM25     | NP_067062.1    | 840075  | S | 4100  |
| 23238212 | NM_005717.2    | ARPC5     | NP_005708.1    | 3930243 | S | 1767  |
| 61966848 | NM_001013699.1 | LOC440093 | NP_001013721.1 | 4730100 | S | 307   |
| 70608079 | NM_001002009.1 | NT5C3     | NP_001002009.1 | 3780689 | A | 962   |
| 55743129 | NM_001007074.1 | RPL32     | NP_001007075.1 | 2340373 | I | 1     |
| 90186266 | NM_024669.2    | ANKRD55   | NP_078945.2    | 4670056 | S | 1969  |
| 1.13E+08 | XM_942212.2    | LOC649821 | XP_947305.1    | 5550364 | A | 192   |
| 4757873  | NM_004334.1    | BST1      | NP_004325.1    | 4920243 | S | 1081  |

|          |                |           |                |         |   |       |
|----------|----------------|-----------|----------------|---------|---|-------|
| 34147635 | NM_006807.3    | CBX1      | NP_006798.1    | 2450446 | S | 1745  |
| 89026887 | XM_935752.1    | LOC641978 | XP_940845.1    | 6040114 | S | 7     |
| 88983545 | XM_926814.1    | LOC653158 | XP_931907.1    | 3460735 | A | 194   |
| 51972215 | NM_001004322.1 | FLJ38717  | NP_001004322.1 | 990100  | S | 2559  |
| 90577173 | NM_014358.2    | CLEC4E    | NP_055173.1    | 940754  | S | 1426  |
| 7705482  | NM_016407.1    | C20orf43  | NP_057491.1    | 4050537 | S | 1458  |
| 89276754 | NM_002760.3    | PRKY      | NP_002751.1    | 2900048 | S | 6641  |
| 68160956 | NM_003264.3    | TLR2      | NP_003255.2    | 1260008 | S | 3246  |
| 15529971 | NM_033412.1    | MCART1    | NP_219480.1    | 1980521 | S | 1556  |
| 10092618 | NM_020529.1    | NFKBIA    | NP_065390.1    | 4570154 | S | 992   |
| 37059785 | NM_018334.3    | LRRN3     | NP_060804.2    | 7380181 | S | 2676  |
| 20336283 | NM_052961.2    | SLC26A8   | NP_443193.1    | 6650717 | A | 2874  |
| 55741472 | NM_020760.1    | HECW2     | NP_065811.1    | 3140541 | S | 6706  |
| 34328944 | NM_004202.2    | TMSB4Y    | NP_004193.1    | 4150095 | S | 1360  |
| 88953511 | XM_934651.1    | LOC653596 | XP_939744.1    | 430209  | I | 6963  |
| 98986451 | NM_023075.4    | MPPE1     | NP_075563.3    | 780168  | A | 2114  |
| 83722281 | NM_198578.2    | LRRK2     | NP_940980.2    | 1450523 | A | 7502  |
| 73747914 | NM_000544.3    | TAP2      | NP_000535.3    | 2970240 | I | 5257  |
| 89026533 | XM_942096.1    | FLJ40722  | XP_947189.1    | 2600632 | I | 2233  |
| 27502389 | NM_001562.2    | IL18      | NP_001553.1    | 5890196 | S | 1038  |
| 56788365 | NM_007166.2    | PICALM    | NP_009097.2    | 1580364 | I | 1560  |
| 54112402 | NM_017780.2    | CHD7      | NP_060250.2    | 4640750 | S | 10019 |
| 14589888 | NM_001792.2    | CDH2      | NP_001783.2    | 4780376 | S | 4032  |
| 89041683 | XM_935186.1    | LOC440456 | XP_940279.1    | 7510424 | I | 895   |
| 88942472 | XM_930480.1    | MGC12760  | XP_935573.1    | 4490338 | I | 1659  |
| 37622904 | NM_006242.3    | PPP1R3D   | NP_006233.1    | 6400064 | S | 3031  |
| 51243031 | NM_001003712.1 | OSBPL8    | NP_001003712.1 | 3830138 | A | 6974  |
| 1.13E+08 | XM_001133926.1 | SLC25A20  | XP_001133926.1 | 770255  | I | 561   |
| 29171680 | NM_001557.2    | IL8RB     | NP_001548.1    | 2710437 | S | 2541  |
| 45333920 | NM_024095.3    | ASB8      | NP_077000.1    | 4280114 | S | 2124  |
| 37574625 | NM_006707.2    | BTNL3     | NP_006698.1    | 3180082 | A | 1714  |
| 1.09E+08 | NM_013364.3    | PNMA3     | NP_037496.2    | 2490113 | S | 3474  |
| 17921988 | NM_006000.1    | TUBA4A    | NP_005991.1    | 380731  | S | 1391  |
| 31377615 | NM_138287.2    | DTX3L     | NP_612144.1    | 2850100 | S | 4588  |
| 89040690 | XM_936461.1    | LOC647389 | XP_941554.1    | 6040181 | S | 837   |
| 22547162 | NM_024586.3    | OSBPL9    | NP_078862.2    | 6020685 | A | 2397  |
| 9966838  | NM_020370.1    | GPR84     | NP_065103.1    | 2370576 | S | 1181  |
| 95006998 | NR_002189.2    | SUMO1P1   |                | 5340050 | S | 447   |
| 54607115 | NM_198271.2    | LMOD3     | NP_938012.2    | 4250609 | S | 3155  |
| 39777600 | NM_003245.2    | TGM3      | NP_003236.2    | 3440754 | S | 2485  |
| 19923725 | NM_002514.2    | NOV       | NP_002505.1    | 6420367 | S | 1974  |
| 30102945 | NM_178231.1    | ALS2CR14  | NP_839945.1    | 4900215 | S | 830   |
| 62912451 | NM_016824.3    | ADD3      | NP_058432.1    | 1690273 | I | 2132  |
| 1.09E+08 | NM_025180.3    | CEP63     | NP_079456.2    | 1090300 | S | 2450  |
| 4504152  | NM_001511.1    | CXCL1     | NP_001502.1    | 6130576 | S | 792   |
| 95007029 | NM_001040616.1 | LINS1     | NP_001035706.1 | 730491  | A | 1016  |
| 61966890 | NM_001013722.1 | LOC441193 | NP_001013744.1 | 2060113 | S | 1600  |
| 19923652 | NM_033222.2    | PSIP1     | NP_150091.2    | 1240541 | I | 3023  |

|          |                |            |                |         |   |       |
|----------|----------------|------------|----------------|---------|---|-------|
| 20544150 | NM_016587.2    | CBX3       | NP_057671.2    | 4880020 | I | 37    |
| 13899331 | NM_031476.1    | CRISPLD2   | NP_113664.1    | 6060224 | S | 4224  |
| 88944406 | XM_931214.1    | LOC653105  | XP_936307.1    | 3800139 | I | 1     |
| 19920316 | NM_006825.2    | CKAP4      | NP_006816.2    | 6770348 | S | 2458  |
| 56090219 | NM_001007535.1 | dJ341D10.1 | NP_001007536.1 | 4180402 | S | 1152  |
| 24432071 | NM_145032.2    | FBXL13     | NP_659469.2    | 5050653 | S | 2503  |
| 50345994 | NM_003972.2    | BTAF1      | NP_003963.1    | 1820546 | S | 6646  |
| 38201610 | NM_170607.2    | MLX        | NP_733752.1    | 5820021 | A | 2409  |
| 88758607 | NM_012428.2    | NPTN       | NP_036560.1    | 5360338 | A | 1992  |
| 88943484 | XM_497711.2    | LOC653604  | XP_497711.2    | 730468  | S | 12    |
| 18105038 | NM_001866.2    | COX7B      | NP_001857.1    | 70722   | S | 141   |
| 42476163 | NM_002697.2    | POU2F1     | NP_002688.2    | 3850554 | S | 2380  |
| 1.13E+08 | XM_001134256.1 | LOC729853  | XP_001134256.1 | 5720204 | S | 1261  |
| 42544180 | NM_001721.4    | BMX        | NP_001712.1    | 5560451 | A | 1987  |
| 74272286 | NM_004994.2    | MMP9       | NP_004985.2    | 4150224 | S | 2049  |
| 47106078 | NM_017839.3    | AYTL1      | NP_060309.2    | 5670100 | S | 1697  |
| 67189969 | NM_000433.2    | NCF2       | NP_000424.2    | 7050360 | S | 2056  |
| 32563547 | NR_001545.1    | TTY15      |                | 2570082 | S | 4933  |
| 46249360 | NM_145686.2    | MAP4K4     | NP_663719.1    | 2450170 | A | 6802  |
| 15718674 | NM_001629.2    | ALOX5AP    | NP_001620.2    | 4180411 | S | 664   |
| 73747924 | NM_148954.2    | PSMB9      | NP_683756.1    | 6130669 | A | 767   |
| 33469923 | NM_182802.1    | MCM8       | NP_877954.1    | 6270082 | A | 3364  |
| 47419935 | NM_003137.3    | SRPK1      | NP_003128.3    | 3460674 | S | 4153  |
| 31563435 | NM_144673.2    | CMTM2      | NP_653274.1    | 5080300 | S | 763   |
| 33285009 | NM_022746.2    | MOSC1      | NP_073583.2    | 1980082 | S | 1680  |
| 50284695 | NM_182757.2    | IBRDC2     | NP_877434.2    | 5910037 | S | 4431  |
| 21389370 | NM_144590.1    | ANKRD22    | NP_653191.1    | 4200543 | S | 609   |
| 68303646 | NM_001025077.1 | CUGBP2     | NP_001020248.1 | 6110672 | I | 2065  |
| 89030416 | XM_938919.1    | LOC648226  | XP_944012.1    | 3780189 | S | 2404  |
| 45827727 | NM_005980.2    | S100P      | NP_005971.1    | 2640609 | S | 378   |
| 21314634 | NM_002784.2    | PSG9       | NP_002775.2    | 1050465 | S | 404   |
| 38026951 | NM_033656.2    | BRWD1      | NP_387505.1    | 430400  | I | 12653 |
| 25777623 | NM_172027.1    | ABTB1      | NP_742024.1    | 5670424 | A | 1913  |
| 40807350 | NM_152313.2    | SLC36A4    | NP_689526.2    | 2350195 | S | 2320  |
| 40255235 | NM_012482.3    | ZNF281     | NP_036614.1    | 6940113 | S | 2768  |
| 13375790 | NM_024595.1    | C1orf108   | NP_078871.1    | 1690673 | A | 1613  |
| 20127493 | NM_006305.2    | ANP32A     | NP_006296.1    | 3360546 | S | 987   |
| 1.13E+08 | XM_939954.2    | LOC388789  | XP_945047.2    | 1440259 | A | 219   |
| 96304477 | NM_020686.4    | ABAT       | NP_065737.2    | 1030685 | A | 4303  |
| 1.13E+08 | XM_371152.3    | ZNF486     | XP_371152.3    | 2070471 | A | 3074  |
| 1.14E+08 | NM_020920.2    | CHD8       | NP_065971.2    | 5310433 | S | 7016  |
| 1.13E+08 | XM_944290.2    | KIAA0492   | XP_949383.1    | 1090609 | A | 5727  |
| 34147390 | NM_030578.2    | MGC4093    | NP_085055.1    | 270519  | S | 895   |
| 22165432 | NM_145869.1    | ANXA11     | NP_665876.1    | 7380450 | I | 338   |
| 6912575  | NM_012387.1    | PADI4      | NP_036519.1    | 5310653 | S | 2163  |
| 33359218 | NM_182686.1    | KIAA0319L  | NP_872628.1    | 150392  | I | 5065  |
| 38505160 | NM_198795.1    | TDRD1      | NP_942090.1    | 270301  | S | 3989  |
| 1.15E+08 | NM_023001.2    | ARID4A     | NP_075377.2    | 3830228 | A | 4318  |

|          |                |           |                |           |      |
|----------|----------------|-----------|----------------|-----------|------|
| 33942075 | NM_145913.2    | SLC5A8    | NP_666018.2    | 4010021 S | 3702 |
| 77917615 | NM_019000.3    | FLJ20152  | NP_061873.2    | 1230022 S | 2592 |
| 1.13E+08 | XR_017962.1    | FLJ14107  |                | 2900008 S | 1503 |
| 71043965 | NM_030636.2    | KIAA1706  | NP_085139.2    | 6250685 S | 4375 |
| 20336255 | NM_138687.1    | PIP5K2B   | NP_619632.1    | 6370093 I | 1324 |
| 38016920 | NM_006861.4    | RAB35     | NP_006852.1    | 5340243 S | 2738 |
| 5016091  | NM_001621.2    | AHR       | NP_001612.1    | 840189 S  | 4990 |
| 60460880 | NM_080603.3    | ZSWIM1    | NP_542170.3    | 1260082 S | 2094 |
| 96975022 | NM_182703.3    | ANKDD1A   | NP_874362.3    | 3290296 S | 2807 |
| 17986253 | NM_080424.1    | SP110     | NP_536349.1    | 10546 I   | 1934 |
| 16554582 | NM_003389.2    | CORO2A    | NP_003380.2    | 4590554 A | 1976 |
| 88953548 | XM_930995.1    | LOC653086 | XP_936088.1    | 6860064 I | 6448 |
| 29171681 | NM_002186.2    | IL9R      | NP_002177.2    | 290424 A  | 1990 |
| 40254907 | NM_017833.2    | C21orf55  | NP_060303.2    | 4390136 S | 1982 |
| 1.24E+08 | NM_001080951.1 | PLAGL1    | NP_001074420.1 | 2230475 A | 2085 |
| 33859844 | NM_013361.2    | ZNF223    | NP_037493.2    | 4760767 S | 2321 |
| 57163721 | NR_002206.1    | GTF2IP1   |                | 6200438 S | 2314 |
| 51663330 | CR738550       |           |                | 5810274 S | 470  |
| 21757894 | AK097979       |           |                | 5820441 S | 2069 |
| 16550235 | AK055497       |           |                | 2470440 S | 3173 |
| 4739546  | AI655567       |           |                | 2600138 S | 157  |
| 2079612  | AA417811       |           |                | 2320722 S | 257  |
| 27835509 | BX108917       |           |                | 1050543 S | 489  |
| 14432774 | BI026144       |           |                | 2810653 S | 145  |
| 22665185 | BU151653       |           |                | 1170133 S | 539  |
| 80547114 | DA385619       |           |                | 3990497 S | 469  |
| 81140489 | DA572426       |           |                | 1260750 S | 447  |
| 21985501 | BQ777029       |           |                | 7100053 S | 344  |
| 21733442 | AL832858       |           |                | 2100576 S | 2072 |
| 38512164 | BC062546       |           |                | 5570224 S | 2313 |
| 23238724 | BU587445       |           |                | 5130747 S | 1    |
| 27879393 | BX113731       |           |                | 4880541 S | 50   |
| 19044878 | BM723547       |           |                | 6200424 S | 592  |
| 51656959 | CR746297       |           |                | 4250470 S | 589  |
| 9866586  | AV645572       |           |                | 6960445 S | 241  |
| 15330256 | AW020492       |           |                | 4210128 S | 313  |
| 34530644 | AK124771       |           |                | 6510626 S | 3322 |
| 21178167 | BQ439091       |           |                | 5900204 S | 544  |
| 19016391 | BM703133       |           |                | 4250026 S | 218  |
| 27878684 | BX111927       |           |                | 3940719 S | 35   |
| 21848608 | BQ709709       |           |                | 6450368 S | 471  |
| 1760761  | AA179392       |           |                | 6020577 S | 30   |
| 19722737 | BM997836       |           |                | 3850634 S | 387  |
| 30219749 | CB963631       |           |                | 240102 S  | 279  |
| 22364332 | BQ948854       |           |                | 4040075 S | 765  |
| 28277084 | BC045657       |           |                | 2030326 S | 3657 |
| 19760814 | BQ025535       |           |                | 7000411 S | 315  |
| 19029786 | BM716528       |           |                | 650431 S  | 466  |

|                         |           |      |
|-------------------------|-----------|------|
| 27829802 BX099079       | 3850196 S | 533  |
| 6660861 AW273831        | 20070 S   | 171  |
| 24041994 BU857004       | 4220468 S | 174  |
| 5100912 AI738931        | 6200168 S | 251  |
| 34194422 BC037864       | 4810082 S | 4220 |
| 27835769 BX109404       | 2190176 S | 112  |
| 12362621 BF945346       | 770500 S  | 452  |
| 27844508 BX100504       | 7160598 S | 193  |
| 80823217 DA395916       | 4590053 S | 550  |
| 3183900 AJ227862        | 670441 S  | 220  |
| 2785000 AA744250        | 4640685 S | 189  |
| 34526117 AK129555       | 6480148 S | 405  |
| 21733307 AL832727       | 1500619 S | 4727 |
| 24732379 CA396207       | 3610255 S | 536  |
| 18978757 BM668860       | 6110762 S | 443  |
| 27825094 BX092006       | 1170193 S | 293  |
| 15332023 BI492679       | 3390333 S | 304  |
| 30981510 CD238045       | 1990097 S | 101  |
| 55940382 AV651069       | 7650746 S | 216  |
| 4888225 AI678043        | 3840504 S | 131  |
| 16179735 BI915787       | 4150327 S | 129  |
| 27840427 BX117171       | 1430504 S | 334  |
| 3096496 AA938457        | 5690064 S | 238  |
| 1156211 N35069          | 830553 S  | 137  |
| 5741141 AI948831        | 650593 S  | 209  |
| 8907626 BE220308        | 5560719 S | 359  |
| 16550218 AK055485       | 3390348 S | 2006 |
| 4500184 AL049390        | 4220301 S | 1933 |
| 8611465 BE148741        | 7510523 S | 218  |
| 8655615 AL359560        | 1980242 S | 1386 |
| 1695587 AA134590        | 3450309 S | 479  |
| 21753601 AK094521       | 2900132 S | 960  |
| 34530059 AK124299       | 2190259 S | 2411 |
| 10437827 AK025332       | 3850020 S | 1748 |
| 82859048 DR977977       | 50433 S   | 10   |
| 31874202 BX538075       | 4220050 S | 2335 |
| 15948260 BI836710       | 110138 S  | 574  |
| 1802546 AA204695        | 6510753 S | 212  |
| 31811548 CD642055       | 4890674 S | 504  |
| 10722614 AV705309       | 5960528 S | 357  |
| 10217337 BE796139       | 5220291 S | 813  |
| 27878392 BX111162       | 5050112 S | 380  |
| 4507744 NM_003329.1 TXN | 7610747 S | 23   |

| SEQUENCE                                             | Chromosome |
|------------------------------------------------------|------------|
| GGAGCCCTGATCCTGCCACTGCACTCCAGCCCCGGGCGACAGAGTGAGACC  | 7          |
| GTCTTCACATCTACCTTTCTATGTCACATGTGCAAGATGGTTGCTCTGCC   |            |
| GGGAGGAAGGAACGAGGCAAGGAGCTAAAGCAGCGTGCGTTCAGCCCTGG   |            |
| GCCTCATGTCTCTGCAGGGTGGACATAGCTCTAACTCTCTGAAGCTGAGT   | 14         |
| TGGGATTCGGCCTCTGAAAGTGGTGGTAGTTCAGATTTATGTGAATGT     |            |
| TGGCTAGAATATGGCAGTAACTACAAGGCATGTTCTGCTCTGGCACGAAG   | 1          |
| TAAGATCATGTCACTGCACTCCAGACTGAGCAACAGAGTGACACTTTATA   |            |
| GTCTTCCTTGAATACCCTGGGGGAAGAGAATCCTCCAGTCCTTGGGATGC   | 13         |
| GGGGTAGAAGTTATGCTTGTGTTTTCTCCAGGCCAAAATCAACAGCTGATC  |            |
| AGGACAACCTTTTAGCCGGCAGCCCAGACCAGCGCGGCACCTGTCTCCGGA  | 7          |
| GGGGTGAAGTGGAAAATCCAGGGCAAGTTTCGTGGAGGAAGTGATGCCTG   |            |
| GCTTTACGTTGCCTCATGTGAGTGCTTCATAGCAGGGTGTGACGCTGGCC   | 16         |
| GCCAAATCTGAGCATCAGAAGTCTTCCAGTCTACCTGATGCATGATCTC    | 11         |
| TGCCTCCTCCAGTCAGCCTGTTAGTGACCCAGAGATGGGCTCCGAGTT     |            |
| CCCTGGAAAGCTCCCCGACAACCTCCACTGCCATTACCCACTAGGCAAGT   |            |
| TTGCGGACCTGGCGGAGATGCGCGTTCGCTTCGATTGTAGGCCATTCCTT   |            |
| GAGATGACCTCCACCCAGTTTCACTTCCGTTGTACCCAGCTCTCGTCTT    |            |
| CCGTGTGTCAGGGAGCTGAGTGGAGGCTGAAAGAGGATGGAACACTTCCC   |            |
| GCAGGCTTCTCACTGAGGCCACTGTAAATCAGTATTCTCCTCCTTGCAGC   |            |
| GCAGCATAGAGGGAGAAGAACCTGTCTGTCAACCCACACACGCTTTCCC    |            |
| GGCTCACCAGAGTACCCAGAAGAATCAGTATGGAATTAGAGGACAGTGGC   |            |
| GATGGAAGAGGCCTGTACAACACTCATATAACTTCGGCATTGCCACCTTC   |            |
| TCGGTTATGATGTAGGGGGAAAAGCAGCAGCCTCGAAGCCTCATGCCAAC   |            |
| GCAGATCGAGAGCAAGACTGCTTTTCAGGAAGCCTTGGACGCTGCAGGTG   |            |
| CGCCACACGTAACCTGAGATGCTCCTTTAAATAAAGCGTTTGTGTTTCAAG  | 19         |
| GCCCTGGACTTGGTACAGTTTCAGGAGCGTGAAGGACTTAACCGACTGCC   | 9          |
| GCGCTCGCTACCAGAAATCCTACCGATAAGCCCATCGTGACTIONCAAACTC | 19         |
| CCGTCCGAGACCAGATGACCTGTTAGATGGCTAGTCCTGTATAACTCGAC   | 3          |
| GCCTTCAAGCACAAAGTGATGAATGACTGCCTTCAAGTCTCAAGAAAACA   | 9          |
| CTGTTTCTCAGTGCTGCTTACTATTTTGGTAACTGGGCCTTTCTTGGGG    | 6          |
| CCACGCGCGAAAATTCGGCCAGGGTTCTCGCTCTTGTGCGGTCTGCTCAA   |            |
| GCAGCTCCTGAAGGTCTGTGTTGCACTGTACCCAGTCTCAAGCTATGCCT   | 9          |
| GTACTTATTTTGCATTTTGGTTCATGGGTGGGAATGGGGTGGGTGCCTAC   | X          |
| TTGAGACCAGCCTGGGTGACACAGCAAGACCCCATCTCCACAAACGTTTT   | 19         |
| TGGAATGAATCTCATGTGAGGCTACCAGGACCAAGACCCAATCGTCCTG    | 11         |
| CGTCTTCAAGGACCCAGTTGCTGATCCCAACAAAAGGTCCAAAAGGGCC    |            |
| AAGTGGAGGTTGCAGTGAGATCGCGCACTGCACTCTAGCCTGGGCAGTA    | 13         |
| CCACAAGTTTACAGTCAGCGGCACGGGAGCAAGAAGGATTGAGGCTGGG    | 7          |
| GTGGTCTTTCTGGAGAGGTTATAGGTCCTCTGGGGCCTCTTGGGTCCC     | 10         |
| CACTCCAGCCTAGGGCAGAGCAAGACCCATTCTCTTACAAAGTCTCT      | 3          |
| GGAAGTTGCCCTTACAGGTGGGACCTTTTGTGTTAATCTGTTTTCTCCC    | 1          |
| GGCGCAGGTGGGCTGGACTTCTACCTGCCCTCAAGGGTGTGTATATTGTA   | 11         |
| TGTGGACTTGAGCAGCGGTGACTTCGCAAGCAAATGGATTGTCAGGCTTG   | 7          |
| CTGGTAGCCTTCAAGTGGCCATGGTGGGAGCATTGACCCAGGGAAATCCA   | 20         |
| CAGCCTGTGTGTGCACGCCCCATGAGCCGAAAAGTGGGTCTTATGTTTTC   | 6          |
| GGGGCATGTTGTGCATGTAGTCAGCCACTTATGCACCAATGTGAGGAAA    | 14         |
| GGCTCTGTCAGCCATGTGACTGTAGTCCACATGGAGCTCTCAGCATAACCG  |            |

|                                                     |    |
|-----------------------------------------------------|----|
| CCCAGCGCTTTGGCAGGCCAAGGCGGGCAGATCGCTTGAGCTCAACAGTT  | 1  |
| GGGGGCTTGTACCTCCCCACCTTCTTCTGAGTCATTCTGCAGCCTT      | 1  |
| CGACTTTCCCGATCGCCAGGCAGGAGTTTCTCTCGGTGACTACTATCGCT  | 1  |
| CACCTCAAAAAGTGGTAGAATCTGAGTGTCTTCAGGCCAACCTGGTGGAA  | 17 |
| GCTACTCAGGTGGCGGAGGTGAGAGGATTGCCGAACCCAGGAGTCAAAA   | 5  |
| AGAGGTGCGGTGCATCGGCGAAGAAACCAGGCCAGACCGTAGTGCCTTAT  |    |
| CACGAGAACATGCCTCTCGCAAAGGATCTCCTTCATCCCTCTCCAGAAGA  | 1  |
| TGTTACAGCGCTTCGAAATATTCTTCATCAATGACAACGCAGCTTCTGGT  | 1  |
| AAGTAGACACTTGGTCTTTCCAGTTGCCAGCATCCTGCAGTCCTCCTGC   | 16 |
| ATCACCCCAGAGGAAGGGAAAGGCTACCGCGAAGAGGTCTTGACCGTGA   | X  |
| CAGTGACCAGGTTACCTACAGTAGTGACTGCCATCTGTGCTCCAACATTC  |    |
| CAAGTTTACTCCTTCTGTTTTGAGTTTTGTAGCAGTGTACCCACGCTGGG  | 13 |
| GCTACCATGACCAATGTCTTTAGACCGTGTTCAGGAGTGTCTCAC       | 14 |
| TGCCCCCTGACTGATAGCATTTTCAAGATGTGTCTTTGAAGGGCTATACC  | 3  |
| CAGGTGTAGGTATAGGAGGTCAAGAAAAGGAGTTCGGTAAAGGGCATAGC  | 16 |
| GCTCTGCACCATCCCTCACCCAGACCGTAGACACCAGGGAACCATCTA    | 22 |
| CCACGCATGACCCACACTGACCACACCCTGCCCTTTCGGTGACATTCTT   | 16 |
| CACTGCAGATGCGGTACCTGACTGACCACCTGGGTTTTCTATTACCAGT   | 1  |
| CCTGGGAGCTTTTGTAGAAGTCACATTCCTGAACAGGATATTCTCACAGC  | 7  |
| CATGAGGGGCCAAGACACTGCCTAAGGTGTGGGAGGGACTGGCTGAGATT  | 17 |
| ATGGCCCCGTAAGCAGACTGCCCGCAAGTCGACCGGCGGCAAGGCCCC    | 1  |
| GGAGTTGGTCTTAGCCGCTGCAGGAGCCCTTCTTTTCTGTGGATTATCA   |    |
| CTGTTTCTGCAGGGGATGATATTGGTGAGTTGCCAAAGAAGCAATACAGC  | 17 |
| AGATCTGGGTGCCTTGGGAGAACCAGTCCTTCCTTTTGACCCACCCAGG   | 1  |
| GCTGGGGCACATTTACATATCGACTACCTGAGAAATTGCTTTGTGTCCC   | 12 |
| AACCACCGCTGCCGCTCCTTCTTCTGTCACTCCTGGTGCTGCACTGTGT   | 14 |
| ATGTTAGGAAATGGAGAGGTATAGAGAGAGCAGGTTCCATAGCTCAGCAC  | 16 |
| GGGCCAAAGAGGTGTTAGGTTCAAAGGCTGCGAAGAGAATAGGCTACTGG  | 7  |
| ACCGGCTACCAAGGACTTTGTAGACCTCTACTGGGAGGGACGCTCAC     | 10 |
| CCATCTTGCTTTCCCATTTGGAAGTATGATTAACCCATCTCTGAACTGG   | 8  |
| GCTTGCCCCACTTCAGAGGTTTTGGGGTTCAGGGTGCTGTGTCTCCCCTT  | 19 |
| CAGGACAGAGGCAACGTGGAGAGGCTGAAAACAGTGCAGAGACGTTTGAC  | 20 |
| GACAAGAGTTCTGGGTACAATTTTGGGATCTAGTTCCCCTGGAAAAGCTG  | 7  |
| TGCGCGCACCCCTCTGCCCTGGTCCATCGCTGCCGCTCCTTCTTCTGCAG  | X  |
| GGACCCCGACCTCCAGTTGCCCTACAATTCAGTCGCTGACTTGGTCCTGT  | 9  |
| CCTGCTCGGTGCACTCTCTGCAGGACTTTCCCAATCACGGGACTCAGGTA  |    |
| ACCCGGCCATCCATTTTTCTTCCATGCATCCTGGCTGGGCCGACCCCCA   | 13 |
| GCTGAATCTCCAGAGAGCTCACACTGGCCAGGAATGCTGAGAGTAGCAG   | 8  |
| AACTGAGAACAGTTGACCGCAAGCTGAAACTGGTGTGTGGAAGTCACAGC  | 1  |
| CCACACACTCACCCTCCAGCTTCTCGTGTCCAGTGAAACCCCTGAACC    |    |
| TTGATGCAAGCCCTAAACACTCTTTCGACTCCAGAGGAGAAGCTGGCAGC  | Y  |
| AGGGAGACAAGGAAACGGGCACAGCGAAATCCTGGTGAAGAGCAAAGCAG  | 2  |
| CTTCTCTGGACATGCGCGTTTTGAGGGTGGAGGGGTCTGTAAAGGTGCTTC |    |
| CCAATGGAATGTTCCAGGTGACAGCCCCCTTAACCTCAGTCCTCTCCAG   | 17 |
| GGTGGATAAGGTGACTCAAAGGAAAGACGACTCAACCTGGAACTCAGAGG  | 2  |
| GGGAGGGTAAATAAACCCTGTGCGTCTTGGTGTAAATTTGAAGATTGCC   | 5  |
| CAGACTGGGAACAGGGCCAGGAATCTGTGTGGTACAAACCTGCATGGTG   | 5  |
| GAGATGATGTGTGGTCCCACTGAATGGTATCAGAGTTGTAGTCCTAGCTC  |    |



|                                                      |    |
|------------------------------------------------------|----|
| CTCCCTCTCCAGGGAGCGCATAGATACAGCAGAGCTCACAGTGAGTCAGA   | 9  |
| ATGCTGGTGTAGTCTATACATCAGATTTGTTTGCTACACAAGATCCTCAG   | 4  |
| CAGGCCCCATTGCCTGGGGTTGTTACTGCTGAGATTAAGGGATGCTCGTC   | 7  |
| CTCCTCTCCATTTGTGGCAGTTTGCCTTACTACCTCCCTCTGGCTGCC     | 20 |
| CGGAACATATCCAGTACTCCTGGTTCCTAGGTGAGCAGGTGATGCCCCAG   | 6  |
| TATTTCTGGCCCCCAGTGTGAGCCATTGACAAAGCTTGACCAGTC        | 1  |
| GCAGCAGCCAATTACAGCCCCTTTGTAGCCGGGCGTTCCTATGGTCAAA    | 17 |
| TTTTTTGTCTGGAGGAATGGGGACACCAAACTCATTTGGCAGCAGAGGT    | 2  |
| GCCAAAGGGCTCACCTTACATTGTTAGTTCATGACAGACCCAGGTGTGC    | 12 |
| AGCCTGAGCTGCTGGAACTATTCCCTATGAATTCATGGCATAATAGGTG    |    |
| GCCTATGTGCTAGCCACAAAGAATATTGTCTCATTAGCCTGAATGTGCC    | 1  |
| TGGAACGGAGACAGCATTGGGCTGACTGTGGGCATGAGGAGGGATAAGGC   |    |
| GAGTCTGCCTCCATGCTGCAGTGTTCGAGTGGATTGTAGGTGCAAGATGG   |    |
| GAAATTCTGCCTGAGGACAGCAGCCCAGTGCTTGGCGAGAGTTCCTGACA   | 22 |
| TTGCCAGAGTTTTGCCTGCTGCTTTCCTCGTGGCCTCTTCTGGGTAGTG    | 17 |
| GGAGGATAGCTTGAGCCCAGGAGTTCGAGACCTGCCTGGGCAATATAGCG   | 2  |
| AAGAGATATCCCCTTTCAGCCAGTGACTCGGTCCTCAGTTGCTGCTCCGG   | 9  |
| CTCCAGCTCCAGCCTCATTTGCTTGAAGTTCCTGCTGATGGGGACTTG     | 6  |
| ATCCCCGTGAACCACCTCATAGAGGGCTCCAGAAGTGTGTGGCTGAGCT    | 5  |
| TTGGGCTTCACCCATAACCCACTGCCATGGCCGAGGAACGCATTGCTGTT   |    |
| TCCTAGCTACTTGGGAGGCTGAGGTGGGAGAATTGCTCAAGCCCAGGAGT   | 6  |
| CGTCAGACTCCAGCAGCAAGATGGTGAAGCAGATCGAGAGCAAGACTGC    | 9  |
| TGCCGAGAGGTTGCCCTGATGGGCTCTGCCCGCTGGACATGTTCTTGAAT   | 1  |
| GTAGTCTGCAGATGTGGATCCTAACTCCTGCGAGAAGTAACTCACAGTGA   |    |
| GGGTCTGGAGGGTTGCTATCACTTTGTCCAGCCCAAATACCTTCTGGGC    | 3  |
| CTCCATTCTTGTGCTTGGTCAATAGGGGAGGGTAGATTAGCTGCTCCAG    | 10 |
| TGGTGTGGGAGTTGTCATGAGGCTGTGTTGAAGTGAAGTACTTATCTATGGG | 4  |
| GGGAGGCATGGGCCGGGGCAGTTCTCTCCTCACTTGAACTTGTGTAG      |    |
| GGGCTGAGCACCTCTGGGTTGAATGGGAATGGGTGAGATTGGGAAGCCTA   | 1  |
| TCCAACCCTATCAAATAATGAACTTCTCAGAGAGGCATCTGGGGTCTGG    | 4  |
| GGGGAAAAGGGTGGGATTGTCCAGCATGCTTGTATGTATATTTCAGAACC   | 12 |
| GCTCTTCTTGCCTCTGCTGGAGTCCGGGGAGTGGCGTTGGCTGCTAGAG    |    |
| GGGGTCTGTGAGAGTACATGTATTATATAACAAGCACAAACAGGGCTTGCAC | 4  |
| TTCCAATGCATCCCTGCTGATCCAGAATGTCACCCGGGAGGACGCAGGAT   | 19 |
| GGGCAAACCCAAAGATGGAAGTGTGTTGGGTGGGTAAGCACACCTG       | 12 |
| AGCTCACACCACTGCAGTCCAGCCTGGGTGACAGAGCGAACTCCATCTC    |    |
| CAGTCTAATAAGCTGCTCTGCCCTTGTGCTCAGAGTGGATGTTATGGGA    | 15 |
| CTCCCACCAAGCCAGACACGTTGTAATGCTGCTTCTTATTGGAGCCCAG    | 5  |
| CACAGGTGACTGTGAAACAGATGCCCTGGTCTTGTCTTTCATCACTCTAG   | 10 |
| CACGGAGCGGACTGAGGGGAGTGAAGCGTTCTCTGCACCAAACAACAGTTA  | 1  |
| GTTTCAGCGTCGAAAAGTGGCCAGAAATGAAGAGACCTTCTTCCAAATCAC  | 20 |
| AGTGCCCAGACTGTGTACAAAGACACATGTAATGGAGATTGTACAGGTTG   | 11 |
| TGCGCCGACGATGCCAGAATCCAGAAGTGTCTATCACTCTCCCCAAC      | 1  |
| TGGAATTTGCAAAGCTGCCAAAGCCTTAGACAAGCGCCAAGCCCATCTTT   |    |
| ACTCTGGCCTGGGTGATAGAGCGAGACCCTGTCCCCTGCCCGCCAAAAA    |    |
| AGAGTCTAGTGTGTGCCCTACCCTGGCTCAGGCTTCTGGGCTCTGAGAA    | 3  |
| GCCGTACCAAGTACACCAGCTCCAAATAAATGGACGCATGTTCAAACCC    | 6  |
| CAGAAAGGGAGCCTCACGCTGGCTCACACAAAACAGCTGACACTGACTAA   | 16 |

|                                                      |    |
|------------------------------------------------------|----|
| GGAGCAGGTGGTCGGACAAGCAGTGGCACAGCAGATCCATGCCTTCTTCA   | 19 |
| GAGACAGCCTGGGTGACAGAGTGAGACTCTATCTCAAAGAGAAGACCCT    | 9  |
| CGCCATCACAGCTGAACTTGTTGAGATCCCCGTGTTACTGCCTATCAGCA   | 2  |
| TGCAGTGGATCCCAGCACTTTGGGAGGCCAAGGCGGGTGGATCATCTAAG   |    |
| TCAGCCATCTCAGCCCAGGCCAGACAAGTGGGTGAAGAAGCCACCTTG     | 19 |
| TGTATAGTCTGCAGATGTGGATCCTAACTCCTGCGAGAAGTAACTCACAG   | 16 |
| GGGAATCGGCGATGAACAAAGCAGATAGAAATCCCCACTCTTGTGGAGC    | 16 |
| AGGCCAAGCTTGTTGGCTCATGCCTATAGTCCCAGCACTTTGGGAGGCCA   | 19 |
| AGCACCAGTTCCGTCATTCTCGTTCCTGGGGAACCCCCACTCTGACCTGT   | 16 |
| CACCCCCGAGCTCGCATGCTGTCACCCATTCCAGCCTAAATGTGACCATA   | 16 |
| TCTATGCGCCTGTAGTCCCAGCTACCCAGGAGGCTGAAGCAGGATAATCG   | 2  |
| CTGCACTGCGTGCTGGTGACGAATCCACATTCATCTCAATGGAAGGATCC   | 1  |
| GGATCACAGTGACCTATAATGAGCCGTTGTGCTCCAGCCTGGGCGACAGA   | 7  |
| GTTCAGGTGCATTGCGGCCTATCTGTACAAGGGCAATAACTGGTGGGCCC   |    |
| GCGAAAATTCGGCCAGGGTCTCGCTCTTGTGCTGTCTGTTCAAACCGGC    | 14 |
| ATGCTGGCCACTCTCAGTCCAGCGTTCCTCAGTAGTGAATAGCGAACCTG   | 1  |
| CTGGCCATTCAGGCCCGAAAGCGGAGGCCGAAAAGAGAGAAACATCCGAA   | 7  |
| GGGTGATGTCAGGGTGATAACCAGACATTCATGGAAAGGCATGCAGTTTG   | 5  |
| GGCCGGGAAGCTAAAAGACAAGTCCAAAACAGACCTGGAGAGCTCCTTGG   |    |
| AGATGTGCAAGTGGCGAAGCTTGACCGAGAGCAGGCTGGAGCAGCCGCCC   |    |
| ATCAAAGGCCTGGAACACAATGGTACTCAAAAACATAGCTGCCTCGGGG    | 14 |
| GGGCCCGCTCGCATCCCCTCAAGACGTTTTCTACGTTTACCGCTACTT     | 5  |
| GGCATGCTCTTTGGGAGCTGCACAGTTATGGGGAGGACTCCCACTGCTGT   | 9  |
| CAGTCCCAGCTACCTGGGAGGCTGAGTCAGGAAAATCTCTTGAACCAGGA   | 2  |
| GGACAGTGTCTTTTGACCAACCACCAGGCTTGAAGGCTACAAGAGACGAG   |    |
| GAGGTGGTGGGGACCAGGGCTATGGGAGTGGCAGGTATTATGACAGTCGA   | X  |
| CGTACAAAGCAGACTGCCCGCAAATCGACCCGGTGGTAAAGCACCCAGGAA  |    |
| GATGCAGCAAGAAGGAGCCATCTGCAATCCAGGAAGAAATTCCTTGCCAG   | 10 |
| TTTTGGAGGTCATGGCGGGAGGATCACCTGAGGCCAGGAGTTTGAGGCCA   |    |
| GTGTAGCCAAGAGGACAGAATTACATGAATGACAGTGCCAGAGTGACAG    | Y  |
| AAGGTCATGCCACTGCACTCCAGCCTGGCTGACAGTGAGACTCTGTCTCA   |    |
| CCTAGCCACATGATTTGACTCAGAGATTCTCTTTGTCCACAGACAGTC     | 12 |
| CAGATCTCAAGGTTGATAGTGGTGTTCCTACTAGGAGACGTGGAATTGAGAC | 4  |
| TGCCTTCTGAAACTGCTGCAGTTTCTTTGGGGGTATTGGTAGCCATTC     | Y  |
| GGTGATGGGGTATGAACCTGTGTCTCCTTTGTATCCCTCTGTTGGTGGGG   | 3  |
| TTTTGGGGGGCCATCTTCTAATGCTACACACAGCCTGACAGGGGAGCAG    | 2  |
| GTACCACTGAAACCCTGACCCAGAAAAGTGGCTTGCTTGGACACCCAGCT   | 11 |
| TTCATCAGCCCGCCAAGATGGCGATGCAAGCGGCCAAGAGGGCGAACATT   | 2  |
| ATACCATGGCTCGTACAAGGTGGACTGCCCGCAAATCTACCGGTGGTATA   |    |
| GCATGCCAAAGGGAGGCTGCAGCTGCCCGGAAGAGGCTGAACAAGCTCT    | 11 |
| GCATCTGCCGAGCACCTCCTGTTTGCCAGGCGCTTTCTATACTTAATCCC   | 10 |
| ACACCAGCAATTGTGCCAAGGGCCATTAGGCTCTCAGCATGACTATTTTT   | 1  |
| CGTTCTCTGCCTCACATAGCTTACAAGCCAGCTGGAGAAATATGGTACTC   | 2  |
| TTGTGCTGTAACCTTAGGCGAGCAGAGGAAACCCCTTCTGGGCCTGCTGC   |    |
| GGGAAGAGGCTTGTGACCAGTACCAATCTTGAGTTTTCTTTTTCTGTCCAC  | 5  |
| CAGGTCAGTTGAGGCCAAAAAATATGGGTTTTTTTCAAGTGAACCTCCCC   | 9  |
| GAGCTGGGGAGTTCAAGACCAGCCTGGGCAACATAATGAGATTTAGCTC    | 16 |
| AGGCCCTTTCCTTACAGAGAAGAGCAGACACTGCCATGGACCCGTCTC     |    |

|                                                     |    |
|-----------------------------------------------------|----|
| TGGTGATGAGGGTCTGTAGTCCCAGATACTCAAGAGGCTGAGGTGGGAGG  | 1  |
| CCTCACTGTGTACAGAACGCAAGAAGGGAATAGGTGGTCTGAACGTGGTG  | 1  |
| TCTGTACACCACTGTACTCCAGCCTGACGGCAGAGCGAGACTCCATCTC   | 2  |
| TGTGGCGCGCCTGTAGTCCCAGCTACTTTGGAGGCTGAGGCAAGAGGA    | 8  |
| TCCTCAGGTGACTGGGGACTTGGAAACCTAGGACCTGAACAACCAAGACT  | 19 |
| CAAAATGGCTGGCAAGCAGGCCATTTTCAGCATCAGGCAAGTGGCTGGATG | X  |
| ACATCGCCCCTTCTGCTTCAGTGTGAAAGGCCACGTGAAGATGCTGCGGC  | 16 |
| AGAGCCTCCCATTAAGAGGAGTTAGAGCTGGGCCTTGAGGCTCTTCACT   | 3  |
| TGGTGATGAGGTTCTGTAGTCCCAGATACTCAAGAGGCTGAGGTGGGAGG  | 1  |
| CGGGAGGCACGGCCGAGATGTACACGAAGACAGGAGTCAATGGAGATTCT  | 6  |
| GGAGTTCGAGACCAGCCTGGGCAACACAGCGAGAACTTGTCTCTATTA    | 10 |
| GGAGTATGTCACCTTCTGGGGCCTTGGCTTTGATCTACAATGAAGCCC    | 1  |
| TGGGAGGATCGCCTGAGCCCAGGGAGGTCAAGGCTGCAGTGAGCAATGAT  | 7  |
| CTCCCACCAGCCTCTTAACACTTGCCTGAGGAGGAGAGATGAAATTTCC   |    |
| CCTGGCTCCCGCTGTGCGCTGAGGCTTTGTCCCCTGTCCTTTGGCGAAG   |    |
| TGTCACGTGATCATCAGAAACAGATATCCGAGTGGGTGGGGAGGTGTGCT  | 5  |
| GCCTGTTATGTCAAAGTGTCTTGGCTGTGGGGCTAGGGGCTGGGGCCAAA  |    |
| TCCTGCAGCTGTGTTTGAACAGGTCATTTACCATGCGGTCCTCCAGGTT   |    |
| AAAGGAGAAAGCTCCTGCGGTTGCGCCAGAAACACTACACGCCTTCAGAG  | 6  |
| GTGCAAACAGACATTCCAGAGAGCCTGATCCACATCCAGCAGCAGAGCCC  | 1  |
| TGCTTTCTCCTGCAAAGTCACTCGAAAGGTGACTGGCGGAGGTGAGGCTG  | 22 |
| CTGGACGGCTCCCTCATCTCACGGCAGGCTTTATGTGTGACCTGGACA    |    |
| GGGTGGGCACTTGGGCCTTGCGGGTGCATTCATGTAATCTGAGACTCTTG  | 5  |
| GGGCAGTCAGTTTAGCACAAAGCAATACTAGGCTGAAGGAGAGACCTGAG  | 12 |
| GTTAGCCTTGATATCCCTTCTGTATCCTGTCCTCCTCCACGCCGACCC    | 17 |
| GATCAACCAGTACCAGGTGGTGAACCAACTGCTGAACGCACAGCCTACC   |    |
| CCGTTGCACTCCAGCCTGGGTAACAACTAAGACCCCATCTCTGTCTC     |    |
| GATATGAAAATTGGCTGGGCTTGGTGGCTCATGCCTGTGGTCCTAGCTAC  | X  |
| GGAACTTGACTAAAGACCCCCAGTGTTGTAACGTACCTTTGTACCCAGAC  | 1  |
| GGGTTCAAATGATGGAAGGCCGAAGAGCAAGGCTTATATGGTGGTAGGG   | 17 |
| CCTACCCATTGCCACTCTGTTTCTGAGAGATACCTCACATTCCAATGCC   |    |
| AGAATCACCAGGATGGAACACAGGTCTTGCAGGATCACTTGAAACCTTCT  | 5  |
| TGAGAGCGTGCTCCAGCCTGGCTCCCACAGGCAGCTTAAACCATTAAAC   | 14 |
| GAGCACAGAGGGGCTAGGGGCTGGTCTTCTCGTTTGCTCTAGTCTTGCT   | 2  |
| ACTGCATCAAATCAACCATCTACAGGATACCCTCAGCATGTCGGTGCTC   | 4  |
| GGATCTTCAGTTATTCGAGGGGAATGAGGCAGGTCAAGCCGATGCTAGCC  | 7  |
| GGAGCAGAAGACTAAAGAGAACGAGGAGCTGACCAGGATCTGCGACGACC  | 4  |
| TGGGAGCCCAGAAGAAATGCTCTTTTCTGGAGTTTGTATCCTACACC     | 8  |
| GTGGGATCGAGACATGTAAGCAGCATCATGGAGTTTGAAGATGCCGCAT   | 15 |
| ACGGAAGGATGTAAAGCCTCATCCTAGGAAGGAGCAAGCCCCTCTGCAAG  | 12 |
| ATTGAGTAGGCTGAGGAAGAGGGGGTGGTCTTGTCTCAGGTGGC        | 10 |
| CTAGGCACTTTAGAGGTGCACTTGCATGGCAGGCTGGGCCCCCTTTTCTA  | 22 |
| ATCCTCAGGTTGTGGGGTATTTGTTTCTACTCCAGCCTGGCAGGCAAGGC  | 7  |
| GAGCCCTCTAATGCTAGGAGTAGCAAATGGTCTAGGAAGGGGACTGAGG   | 1  |
| GAGCTCTCATGTTCTGCACCTCAGGAGGGAATTCAGCCTCAGTGATGTCC  | 7  |
| CAGGGGAATCCACACAGCCCCGCTCCCAGGAGCTAATGGTAGAGCGTCCTT | 22 |
| CCGATTCCGCATACCCCCTACCCAGAAATAGGACAATTCACCTCATTG    | 7  |
| CCTCAGGATGGGAGCTCACTCCGAGAACAGGAGAAATCAACATTGCAGT   | 5  |

|                                                     |    |
|-----------------------------------------------------|----|
| GTGAGGGTGCAGAAGACCAGCAAGGAGCTGGAGGACATGAACCAGAAGCT  | 11 |
| TAACCTCCAGGAGTTCCTCATTCTGGTGATAAAGATGGGCGTGGCAGCCC  | 1  |
| GCCCCGTCTCGTGGGATTATTGATTCTGATCCAAGAAGGGTCTCTGGG    | 11 |
| CATGCACCTACACTCCAGCCTGGGTGACAGGGCCAGACTCTGTGAAAAA   | 18 |
| CCCTCAGTGTGAAGCCTGTCGTGTTCTCTCCCCTTGCACTGGTCATCAGT  | 17 |
| GTGAGTGTATGATGTAGGTAATAATATATACCTTCGGGTGCGAGTTCACC  | 4  |
| CAAGGCAGCAGTGAGCCATGATCACACCACTGCACTTCAACCTGGGGGAC  | 17 |
| CTTCCCTTTTGCGGCCATCACCGAAGCGGGAGCGGCCAAAATGAAGTTTA  | 17 |
| GCTGTTCTTAGGGACACCAAGACCTTGATGTTTGGTTCCTACCTGGACG   | 9  |
| AGGCAGACTGAGCATGCCATCAGTTTCTATTGCTGCTTCCATCCCTCG    | 15 |
| CAGTGGCTACCACCTGTAATCTCAGCAGTTTGGGAGACCAAAGCAGGACG  | 5  |
| GTAATCCTAGCACTTTTGTGCGCTGGGCGACACACCAAGGCTCTGTCTCA  | 2  |
| CCCTCCGAGCGGGCGCCTAAGCCTTGCCGTGAGCATGCACACTGAGAAT   | 10 |
| TGCAGAAGTCCGTGGTCATAACCTTGTCTCTGGCTGCATCCAATTGTTGC  | X  |
| CAAACCTGTTTGTGAGATCTCCTTCAAATACTACTGTAGACCCCAAGTGT  | 8  |
| AAGTCTCAGGTGGCTGCGTGTGGTGGCTCATGCCTGTAATCCAACATTC   | 1  |
| CTATCTATTCCATGTTGGACCAATACCACACTGCCCTAGTCACTGTTGCA  | 19 |
| AGATAAGCCGTGGACCCGCTCACCGCTGCAGACAAAGCTGCCATCCGAA   | 6  |
| TCTAGCATCAGATCAATCCAAGAATCCATCAGCAACCTCAGACCAACCC   | 8  |
| TACTCTTGGAGGCTGAGGCAGGAAGAGCCCTTGAGCCCAGGAGCTGGAGG  | 5  |
| TGGACTAAATGCTCTTCTCAGAGGATTATCCGGGGCATCTACTCAATG    | 14 |
| AGTCATGATCACGCCACTGCGCTACAGCCTGGGCGACACAGTAAGACCCT  | 15 |
| CTATGCCATATGTGCTCTGGCTTATTGCCCAATTAATTGTAGTCTCAGG   | 19 |
| CCATCTTCTTACACAGAGAGGCAGCTGAGGCAGGACAGTGGGGCTAACTG  | 9  |
| GGCCAGGGTTCTCGCTCTTGTGCGTGTGTTCAAACAACCGGCACGGTCT   | 9  |
| GCTGGAGTTGGTGTGGGAAACCCGGGGCTAATGTTGACAACAGGCTCGA   | 10 |
| CGTAGGGTAGTCAAGCTTCCAAGACTGCAGACACATCCAATGAGGCGCT   | 6  |
| GCTATACTGTCCTGCTTGTACAACATGGTTTGGGGTGAAGGGGAGGAAAG  | Y  |
| ACATCTTTCTGGCACATAACTGTCTCCTTAACCACTGGAACAGTTCAGCC  | 12 |
| CATGGAGCTCAAGATGTCTTGTGTCTGTGTGGCTAGATGGCCTCTGCTTG  | 2  |
| GAAGCAGCTCCAGCCCATGTTTCTGAAGGGTTACCGCTGACAAGGAGTCA  | 14 |
| CTGCACACATTCTTATTAGGATTCCACCTTGTCTGGTGTGATAGAGATG   | 19 |
| AACGGTCTTAGACCCCCTGTGCCCTGTGCTGTAGCTTCTTTCCAGGCC    | 19 |
| GCCCAGGTTGAAATGGAGCAGGCCAAAACCTCCAGGCTGATCAGTAATG   | 1  |
| GGAGAAAAGGACAGGGATAGGTACCACAAAGATAGGGACCACACTGACAG  | 6  |
| GTTTTGGAGGTCATGGTGGGAGGATCACCTGAGGCCAGGAGTTTGAGGCC  |    |
| CTTCTGCCCTCTTCAGACAGTCTTCAGCTATTCATGGCTCTCACCT      | 1  |
| ACACAGTAGCGATGGAGGTGACGTAGCTTCTCCGAGTGGAACCTGCAGCC  | 10 |
| CTAAGGGGGTTGAGGTTATTGTAGACGTTAGATTGCGGGCACCGCCAGGG  | 20 |
| GGGGTTAAGGTTTATGAGAACCATGGAAAGATGTGGTCTGAGATGGGTGC  | 2  |
| CTACTCGGGAGACTGAGGCAGGAAAATCACTTGAACCTCGGGAGGCAGAGA | 12 |
| GTGTCCAGTATGGCTTTCCAGGCTAATCACTTAGGGCAGAGACCCAGCCT  | 5  |
| GCCAGGGCGGGGGCGGGGTGCATTTCCATCCTTGTAACCCTTCATAGTA   | 14 |
| TGTCCCACTTCTCTATGTCCCTTTCCTTGGTGTCTGTGTCTGTGGGGCC   | 22 |
| CTGTATTTAAGGGTAAGCCCCACAGCGGGCAGCACAAACAGCCTGGGAGC  | 1  |
| TGTGGCGCTCCGTGAAATTAGACGTTATCAGAAGTCCACTGAACTTCTGG  |    |
| TCCAAGGCCTGGATGCTAATCAAGATGAACAGGTCGACTTTCAAGAATTC  | 1  |
| TGCAAGGGACAGGGGGCCTGACTACCCAGTCTTTGACTTGTATCCTCTCC  | 1  |

|                                                      |   |    |
|------------------------------------------------------|---|----|
| CCGCCTCCGCGACACGGGGAACTGTTTTCTTGATGATGCTGTGAACCTT    | X |    |
| GATTGTGCCACCGTACTCCAGCCTGGGCGACAAGAGTTAGACCCTATCTC   |   |    |
| CCACGCTTAAACCAACCCCCAAATTTAGCATATTCATTTGCCATGAGCC    |   | 12 |
| GGAGGTCTGGCTCAGGCTCAGTTTTCTCACATTGGTGCATCTCTTCATGC   |   | 15 |
| CAGCCCAGAGCACTTACTGAGAGTAAAGAGGCTCTAGCCACCCCCTTACC   |   | 7  |
| AAAAGAGTGCTAGGATTGGGCCAGTTAAGAGCAGGGGAGACCTGGCTGGG   |   | 6  |
| CAAAGAAGCAGGGGAAAAGTAAGCTCCTCCAAAGTTGCTTGCAAGTCTGG   |   | 6  |
| TGGTGTGCCATCGCCGTGCTAGTGGGGGTGCTTCTCCTCGTTCTCATCTT   |   | 19 |
| GGGCAGAAGCTGGCTCTCTACTTACAACCTGCTTTCTCTGCTGAAGCCTT   |   | 17 |
| GGAACCTCCCAACTTCGTGCCCTAGATCCTGCACCTCCCACTCGAAAGTG   |   | 19 |
| CAGCCTGACCTATGGGGCGGGGGACTGGAGGCTGAGTTTAATCATCTGGC   |   | 17 |
| CCTACAAGTGCTGACCAAGCTGGGCAGTTTTAGTTAGAATCCTCCTTTTG   |   | 2  |
| CGATGAGAAGGTTTACTACACTGCAGGCTACAACAGTCTGTCAAATTGC    |   | 6  |
| ATGGATCATCTGAGCCTCAGGAGGTTGAGGCTGCAGTGAGCTGTGACTGC   |   | 15 |
| TCCAGCAGTGGTCATTTCGACAACGAAAGTCATACCGTAGAAAAGATGGCG  |   | 17 |
| AGCAGTGCCTGTGACGCATTCTGTGCTGACCTGGATTCTTCCAATATGC    | Y |    |
| GCCACAAATAGAAAAGTTTTCTGCAAATGTACCCATTCCCCTGTGCGAG    |   |    |
| GGCAACTCCAGTCAGAACAGCAGAAATAAGCGTGCCGTTCCAGGGTCCAGA  |   | 13 |
| CTCTGAGACTGCTAAGTAGGGGCAGTGATGGTTGCCAGGACGAATTGAGA   |   | 11 |
| GGGGAAGAAGCAAGGAGTCTAAGGCCCTAGCGATTTGGGCATCTGCCACA   |   | 1  |
| GGTTTTCTCCTACATGGACCGACAGCCAAATCTGCCTTACCTGGCACGC    |   | 6  |
| GATGGCGGAAAGAAGGCACCAGGGCACAGTGGACACTCATCCCGTGACAG   | X |    |
| GTGGAATGGCCCATGCCTGTAGTCCCAGCTACTCGGGAGGCTCAGCAGCA   |   | 18 |
| CCTTAGGTCTCTTGACAGGAATCTGCCCTCAGACAGCCAGGACTTGGGTC   |   | 10 |
| GTCCAGGATTGCCTCACTTGAGACTTGCTAGGCCTCTGCTGTGTGCTGGG   |   | 3  |
| CCTTGGCCCTCCAAGGCTGGGAAAAGACAATGACAAGTCAAATCCAGACC   |   | 11 |
| GCCTGAGAGAGCTGAAGAGGCAAAGCTAAAGGCCAAATACCCAAGCCTAG   |   | 1  |
| CAGCGTTAATCCTGTATGGCCAGGAACTGAGTAGACTCCTGTGTAACCC    |   | 10 |
| TTACAGCAGCCAGACGATCATGCAGCTACTACATCACTTTCTTGAAACG    |   | 14 |
| CTCCCCGTCTTGGAACAAGTTTTAGTTTATTGCTTTGGAGACTAGAGCC    |   | 1  |
| CCTCCCAACTCTGATCAAGATCTTAATGAATCCCTGCCACCTCCACCTGC   |   | 17 |
| GTAACCTCCCCCAGGTACGATAGGGACTGAATATGGACCCTGCTGAAAGC   |   | 13 |
| CTCCAGCCCACGTTCTCTGCTGTGAGCCAGTCTAGTTCTGATGACC       |   | 15 |
| GAGCTGAAGAGGGGCTGCTGTTTTCCGAATGTTTTCCATTTACAGGGCGC   |   |    |
| GGTGATGTATGGCTAAGATTTCACTTTAAGCAGTCGTGAAGTGTGCGAGC   |   | 2  |
| CGGAAGTGGAAGTGGTCTTCCAAGGCTTTTTGCCGCTGGTGTGTCAGGAGT  |   | 19 |
| GTGGGTGGCAGGGAGAGAAACCCACCTAGGCCTCTCAGTGTGTCCAGGAT   |   |    |
| GCAGCCTCAAAGAATTACCCCTCCCAAATGTCAGAAGTGTGAGGCTGA     |   | 2  |
| GGTGATTACCCTGTGTATAAGAGTATGTGTCTCACTGCACCTTCAATGGC   |   | 1  |
| AACCGCCTACGAGACTCAAGGTCTCTCAGGCAGCTGCAGAGCTTCAAC     |   | 9  |
| ACACACCTGGAGAGGACATTTGAAAACACTGTTCTTACCCTCGAACCTG    |   | 14 |
| CGAGTAGCTCTAAAACAAACCACCTGACCAAGAGGGAAGTGTGAGCTTGTGC |   | 1  |
| TTCAACACTGACCTGAGTTTTAGAGCGCAGTCGTGCGTGCAGGA         |   | 12 |
| ACTCCAAGGAGACTTAAGAATGGCAGATGGAGTGGCCAATGTTGAGCAC    |   | 7  |
| GACCTCCTGGGATCGCATCTGGAGAGTGCCTAGTATTCTGCCAGCTTCGG   |   | 3  |
| CTGCCAACCCACCAAGTGTGAAAATTAAGTGTGGGCCACTCGCTGCAGA    |   | 5  |
| GGCCTTCTACCTAACGCCACCAACATGGTGTTCAGGCGCTTCGTGGAGG    |   |    |
| GTAACCTGGAAACTGTGTTGCTTAACCCTCCTCCAGCCCTGCAGCCTCCC   |   | 4  |

|                                                     |    |
|-----------------------------------------------------|----|
| AGAGGAAGAGGGTGGTAGAGGAGGTAAGACAGTAGGGAAAGACAAGGGCC  | 17 |
| CTAATAACAGTGACCTCCCCGCCAGGTCCTGTGTGTTGCCGGCTGAAGAA  |    |
| TATAAGATATTAAGGGTAAGTCTCTCCGGCCCGTTTCCCTCGGTGTGC    | 5  |
| TTGCAGGGGCCGAGACCCACCATTGCACTCCAGTCCGGGAAACAAGAA    | 6  |
| GGCTGTAACCAAGTCCACCCATCCCTGGGGCTTCTTTGCTCTGCCTTAT   | 12 |
| TCCCTCTGCTACAGCCCTGGGAGGAGCCAGGATCCTTGTGGTCTAGCTA   | 20 |
| ATCTGGCCTTGCCCCAGCAGTACAGTCCCTTCTAATAACGGGGATGCTC   | Y  |
| GCCACAAAAGGCATTCTCTGTCTACCTAGCTGTCACTTCTCTGTGCAGC   | 4  |
| CCTAGCTGCTCGGGAGGCTGAGGCAGGAGAATCTTTTCTTAATTGGCCA   | 9  |
| GAGGACGAGCTGCCCTATGATGACTGTGTGTTGGAGGCCAGCGTCTGAC   | 14 |
| GCTGCCTCTCTCCAGAAATGAACTGTGATGGTGGACACAGCTATGTGAGG  | 7  |
| GCAGCGTTACTGGCCTATGTATCATCCGTCTATGGCTTCCACCCAGTCTC  | 6  |
| CTGGGACCTCAAGAGGAATACCACTTATGTTACTCCTGCACTAAAGG     | 2  |
| AGTGGCGTGCCCTTGGCCTCACAGGCAAAGAATAACTTAAAAGCTGACG   | Y  |
| GTGATGTGTACGCCACTGTACTCCAGCCTGATGGCAGAGCGAGACTCCA   | 2  |
| TCGTCACTCACATGCACGACAGTCCCTGTTCCCCCAGGAAGGGCCTGGTG  |    |
| CACAGCTAGGAAGCCTTAAAAATGTCATGCTGGTATTGGGCTACAACCGG  | 12 |
| ACTTGCCTGGGTACATAGCTAAGGAAGAGGTGGACTTGGCCAGCTTTGC   | 6  |
| CTGGCGTTCCACACCAGCCTGGCCAACATGACAAAACCTGTCTCTACTG   |    |
| TGTGGTGAGCCGAGATTGCACCATTGCGCTCTAGCCTGGGCAACAACAGC  | 11 |
| CTGTAGATGCTGTTGATGATGCCATTCCAAGCTTAAATCCTTTCTCACA   | 11 |
| TGTCCCGAGGCGCAGCAATAATAAGGCAGCTGTTGAATGTGAAGGGTCCC  | 8  |
| GCCTCTGTATTGTGTACCAGAATATAAATGATACACCTCTGACCCAGCG   | 18 |
| GTCCATCAGCCGAGGAGTGGATAAGCCAAATGTGGTGGATCGAGACAATG  | 17 |
| GCCGTCCGGTCTTGTCCCGCAGGCACTGGCCAACATGGCGAAACCCATCT  | 1  |
| GGCCTTCACTGCTACGCCCTGGCCCCAAAACAGAGAGCAAGACAGTTGT   | 20 |
| CCTGCAGTGTAAAGTACAGCACACTGTCAAATCTTTTCTTAAGGTGCAC   | 12 |
| GTAAGGTTGTCTACTCAGGAGGCTAAGGTGGGAGGATCACTTGAATGCCA  |    |
| GGAGGGGAGCATGGGAAGTGACGGTTTAAATGGGCACAGGGTTTATGTTTA | 2  |
| GGCAGTTCCTACACCTACGGTGTGTGTTCCAGCAGGGAGGAGTTATGGGC  | 12 |
| CTCCATCCAGCTAAGCGATCTTGAACAAGTCACAACCTCCAGGCTCCTC   | 5  |
| CGGGACCTGTGTGGGACCTGTGTCCTGTGGTGGCCGTTTGCAGTTTCTCT  |    |
| GAGGGAGAAGAATAAAGCAGCTGCCTGGAGCCTATCACTATGTTTATTG   | 2  |
| GGGATTACAGGCGTGAGTGACCATGCCTAGCTCACTTCCAGGTTTAAACAG | 3  |
| AAATCAAACTACTATGAGGCCGGGCACAGTGGCTCACGCTTGTGGTCTC   |    |
| GCTTCCCTTTTCCCTCTGTGGCAGTTACGATTTTACTTCACTCCTGAGA   | 1  |
| GCATCAACCCTGTGCTCTATGCAGCCATGAACCGCAATCCGCCAAGCA    | 12 |
| GACTTTCAGTTGGCCCTGATTTTCAACCATGTGATTGTTTCACTCCTGG   |    |
| CCCTAGAAATTAGAAAATCAAGCTTTGGGCCAGGTGCGGTGGCTCATGCC  | 3  |
| TGATCCCCAACCTGCACGGGGCATTCCCTGCTTCTCTCAGGCCACCACA   | 20 |
| TGAGGCCCAAAGCACTTGCTTACATCCTCTGATAGCTGTTTCAAATGTGC  | 8  |
| TTTTCTTTGAGACAGGGTCTTTCTCTGCACTCCAGCCTAGGCAACAGAGC  | 2  |
| GATGACGCTTCATCTGTTTCAAAATTCAGTCTCAAACCTCAGTCACCGCA  | 10 |
| GGAAGAGGAGGAACTGAGGTCTCATCATTCTAGAGCGCTTGGATGCCC    |    |
| GGCTGGCGGATCCAAGCAAATGGCCAATGAGATCATTGTGAAGGCAGGGG  | 4  |
| GAAACCATCTTGCATGCTAGAAGTTATTACCTGGCCTATTCAGGCTTTTG  |    |
| GAAAACCTGGGTCTCACATCGAGCTGCTGGAGGAGGTGGCCGAGAAGGT   | 7  |
| TGAATATTAGGGTCATTTGGCACTTCTCAGCAAGTAGGATACTTCTCATG  | 9  |

|                                                     |    |
|-----------------------------------------------------|----|
| TCCCCCTTCGGATGTGGCTTGAGCTGTAGGCGCGGAGGGCCGGAGACGCT  | 7  |
| ACGGCGTTCTGGCTCTCCTGCCACAGGATGAACATTTTCGGCTTCCTT    | 16 |
| TGCCGACTCCATTTTGTCTGGTAGAGGCAGAAGGAGAAGGTCGGGTTGTAG | 1  |
| CTGCCTCCCTCATGGTGTGCGTGTCTTCTTCTGACGCATCTGTGAT      | 12 |
| TCAGGGTCTTCCCATGGTGGTTCAGAATAGATGAGCATAGCAAGGTTTTG  | X  |
| CCCTCCACGTTGGTTTGGCTATGATAGGGAAGGAAACCCTGTTACAGAGC  | 7  |
| CTGGGCAGCAATAATAATTGGGCATGAGGCTGATTACTCAATGGTGAGGG  | 10 |
| GAGATGTCACCAGGATAAGACCACAGGGAAGCAAAGAAGGAAGAGAGCTC  | 17 |
| GGGCTTAACCTGTGACTTTAATAAGCTGGAACAGTCCACTGAATGGGTAT  | 15 |
| GGACCATGAGGAATTCTCCAGTGTCTCGGGTTCGATACTGACACAG      | 1  |
| TCAGCAAACAATGGCAAGGCAGAGCCACCAGAAACGTACACCTGATTTTC  | X  |
| TCCAAGGCACAGTGAGCTGGGCAGAGCTGGGCTGCCAGAAGCCTTTTTCA  | 1  |
| AGGGCTTATTCTTCTCAAGTAAGGGGGAACCTCTGCTTTGGGCTGGGAC   | 1  |
| ACAGGCTTTACCGCCCCACCTGGCATCGGACACCATCTACCAGATCATG   | X  |
| GCTTCTACTGGCGCGTGAGTTCCCGGAGTGAGTTGAACCAGGTGGACCAA  | 20 |
| GACAACCCCTCCACCGCCAGTAATAAAGTCAGCCCTGAAAAGCATGAAG   | 16 |
| GGGGAGAGGAAAAGTGGATGGAAGTGTCTGGAAAGGGCACGAGAGAGTCT  | 1  |
| GGCTGCATCATGGGGAGCCATTTTACAAGCAGCACCATGGGTGTTATGGG  | Y  |
| GCAGGGACCCAGTGAAGTTTCTCCGTTAAAGATTGGGAGTCGTCGAAATG  | 2  |
| TCTATTGGCCATCTGGGCTTACAGCTTGAGTTAACCTTGCTTTTCCGGG   | 13 |
| TGGGAAATGAGTGCTCAGGGAGATGGAGCTTAGGGGAGGTGGGTGCTTCC  | 6  |
| CAGTGAGCCACAATCACACCAATCACTGCACTCCAGCCTGGGCAATAAAG  | 20 |
| GGCAGCTGTAGATCTTGATCTTCCAGGTACCCCATGTACCTTTATTGAGC  | 6  |
| CCACTTCAGAGGCAAGAAGGCCAAAAAGCATATGCTGGTTCCTCCTCCAG  | 16 |
| GGACCCCTGGATCCTTGCCATTCCCCTCAGCTAATGACGGAGTGCTCCTT  | 1  |
| GTTGTGAGGTAGGGAAGTGAGGAGGAAAGCCATGCCGAAGCAAATGTTAG  | 6  |
| CCTCTGCTCTTGAAGCCCGTGCAGACCCCAATAAAGAATAAGCATGG     | 10 |
| CCCGGTGCTTAGAGGTTAACTTGGTGGCCTAGGAGAGGGAGAAGCCAGGA  | 10 |
| TAAGTTAGCCCTTTGGGTAAGAGTTCCAAGTGTCTTCTGGTTTGTGAG    |    |
| AATGATGCCCTGGAGATGTACAGATTCTGGCAGAGCCATGGTCCCAGG    | 4  |
| TCCAACGCATCCCTGCTGATCCAGAATGTCACCCGGAAGGATGCAGGAAC  | 19 |
| AAAGGCTTGCTTGAGGGAGCTTATAACTTGCACCTAGAGGGTTTACCCAC  | 21 |
| CCATTCAGGAAGGGCTGGGGGAGTGTGTGTGGCAATAAAGCTTGAAGGCA  | 3  |
| GGAAAAGGAGGCCTAGAAAGGTTAAGTAACCTTGGTCGAGACCACTCAGCC | 11 |
| GACACCCACCAGCCAGAGTTACAGGTAAGGTCCCAAAAGTGGCCAGGCTG  | 1  |
| CAGGCCCCGGCAGCACTGCTACTTGGGAGGAGCCACTTACCTTTGTATT   | 1  |
| TCTGATTGTAACGTTGCTGTGGGAACGAGAGGGGAAGAGTGTACTGGGGG  | 15 |
| GGCGAAGTCGTCAGACCAAAGGATGGCTCAGCAAGTGAAGTACCCAGTG   |    |
| AACTCAGCAGAAGCTGGTAAAAACATGGGGAGCCCGGAGGACAGGCTGCT  |    |
| CATTGCACTCCAGCCTGGGCAATAAGAGTGAAACTCTGTCTCCAGGAAAA  | 19 |
| GGCCCCATTGCTTGGGCGGCTGCTGTATTTTCACTTACTCTGGCCCTTG   |    |
| GGCCCTATACCTGATCACCTCTAAAAACATGAACAGTGTTACAAAGGCAG  |    |
| GGGGACAGTAAATGTATGGGGTCGCAGGGTGTGAGTGACAGGAGGCTGC   | 19 |
| TCACAGTTCTGGAGGCTGAGAAGATCGTGAGGCTGCATCTGGCAAGGGCC  | 10 |
| GTCCCAGTTTCCACTCTGAAGATCCCAACATGGTCTTAGCACTGCACAC   | 1  |
| GGACAGGTTACCTTCCACAGAGTAAGGGGTGAGTGACCCAAGGCTCAA    | 1  |
| TTTATTACTTAAAGGTACCGAAGGAAGGCCAGGTGCAGTGGCTCACGCCC  | 10 |
| GCCAAAGTATATGTTTCAGCAGTGTGCCAGGATTGAAGGTGTAATGGGA   |    |

|                                                      |    |
|------------------------------------------------------|----|
| GTAATCTGAACATTTGGGAGGCTGAGGCAGGAAGATCGCTTGAGGTCCAG   | 12 |
| AGGTACAGCTGGCATTTTGGCAGATGCATAGAGACATCTGAGACCCTCAG   | 5  |
| ACACTCAGCACCCCTCCCAAAGAGCGCCCCCTGTGTGTTCTGGATCTCTA   |    |
| CCCAGGAAGTGTGCTGGGCAGCCTGTTCTTACTCCAGCTCAACCCATTGG   | 7  |
| TTGAACCCAGGAGGCGGAGGTTGCGGTGACCCTCCAGCTTGGGCAACATG   | 17 |
| GTGGGACTCAGGGCTGGACCGACGTCCTAGTGACCTGATGTGAAATTC     | 12 |
| GGCCAAGATCGCCCCACTGCACTCCAGCCTGGCAATAGACCGAGCTCCGT   | 7  |
| CTGACTCAGCCAGGCTCCCTGAACTTTTTTCTTGTCCCATCCTGGGGTC    | 20 |
| TCGGGGAAACTGTGTGTGCTGAAGAGTACGTGGGAGCTCTCTGTGCTATC   |    |
| CTTGAAGCCTACTGTCATCCACAAAGCTCCTTTTTTACGGGCATCCCAT    | 2  |
| CGCTGAAAGAGATCCAGTGGGACATGGTGCCGTTTTTCTGTTTGCCTTC    | 9  |
| TGATGTGTCACGCCACTGTACTCCAGCCTGACGGCAGAGCGAGACTCCAT   | 2  |
| CTCTGAGAAGTGGGGTGTGGTCTCTCAGCTGTTCTGCCCTCATACCCTTA   |    |
| TTTTTTGAGACAGAGTCTCACTCCAGCCTGGGTGACAGAGCAAGACTCCG   | 21 |
| CCATCCCTCATGTGTTCTCAGCTGGCACTGGCTCTGCCATCCTGCCTCAT   |    |
| TGACCTATGGTAGTGCTACTGCACTCCAGCCAGGGCAACAGAGTGAGACC   | 19 |
| CAGCTGGTTGGTCAGAGTGAGTCAGAAGGCCCGTGATACAAGAATCAGC    | 7  |
| GCATGAGTGAACCCAGGGGAGACATGCAGAGACTTGCCCAGCTGTCTTAC   |    |
| GAATAGGGCAAGACTAAAGGACAGAGTAAGGGTGCTGGCCGCCACCTGAC   |    |
| cctgaggggagAGCTGGTGGAGGCTGTGAAATGAGATGGGGAAGTAGGGA   |    |
| GCACCAACTTCCCTGATGGGCATGGCTCCCTTCACTGTCGGGTTGGATT    |    |
| CGCAGTGGGATAAGTTGCAGGGTCTCTTAACTGCCAAGGTACCAAGTAGG   |    |
| GGGCTGCTGAAAGGGGAAGTTCTTGATGCCTTCATCCTAGCTCAGAGGGG   |    |
| GCAGTGCTAGGTTAAACAACAAGGTGCTTACTTGCTTGGGGTGCCAGCCAA  |    |
| GCCAAGGAGGCAAACCTAGGGTGATGTCATTGTTCTGAAGCTGTCACCGCC  |    |
| ACAGAGCCCTAGTTGGGAGGAGCCACGTTACAGAGGGCACATGGCAAAA    |    |
| CTCCTGACCCAGGCTGCCGACCCCTAACCTGTTTTCTCTCCACAGGACA    |    |
| ACCCAGAAGGTATCACCAGCGAGCCTCATCCAATAGCCTCAGAACGCCCG   |    |
| TCCCACAGTTGGTAGTGCCAGGCAGGAAGCAGGAGTGAGGTTGCAGGAA    |    |
| CACCCGATTGATAGGAGAGTGTGCATGCAGTCAGCCGAACCTCCGACTTCTG |    |
| GGGAGTGCAGTCCGATGCTGCAGAAGACAGACTGTTCCCTCTCTTCCC     |    |
| AGCGCCCCCCTGGATTTATAGGGGTGAGCTTCCCTCATGGAGAGCCTTGT   |    |
| GATGTGTGGCACCTCAGTGTGTCATAGCTTCTGCCTCCTCCGTGTGGAG    |    |
| AGGCCCTGCTTCTATTATGAGAGCCTGGGCCATAGTGAAAAAATGTACC    |    |
| GGTTCACACATCTTGTCTGTGGTGGAGCTAGGACTTGAACCTCAGGCAGCC  |    |
| TGTAGTTTTCCCTCCCATGGAGAATCAAACATTTATACAGCATTCTACC    |    |
| CTCTGGACAGGCTGACTGGTAAAGGGCTTCTATGTTAAAGCTCCTCTGT    |    |
| GCCAGCTCGTCCTTTCAAACCTATGTGAGGGCCTACCTGAGTCACCCCCA   |    |
| GATGAGCTGCCTCTGCCACAAGTGCAATAATATCAGAGCCCAAGTGACC    |    |
| CCACAGAACCCCTTTCTCTAGCAAAACCTAACATTCTATGCCGATCCAAC   |    |
| GGAACCTGAGTGAACCATCTCGATCCTCCAGCATAGCACAAATCAGCAGC   |    |
| TTTTAAGCGATTTAGATGGAAGTGCCACAGTTGCGAGTGGCTCCCCC      |    |
| GAGCTGCTTAGGGACAGGTGAGTCCTTGGGGGCATGGAACAAAGCTGGTC   |    |
| TCCAGGCCAGTAGGTGGTGTGCTGCAGATAAAAGCCAGCTGAGCAATGTGC  |    |
| TTTTCAAAGAGGCCCATTAACCGGCCCCCCAGAGGGTTCCCTTTAGGAG    |    |
| GTCTTTGGAGCCCAGCCTTCCCTGTGTAGTGAGCTGGAAACTCCTTTAGA   |    |
| GCTGCACCGATCCAGTGAGTGTCTGGGTAATGCCTTCACTGCTCTGGGC    |    |
| CTGTCAAACGTGGCACTTGGGCTGCACAGCCTTAGTTGGATACTCTCTGG   |    |

X



GTGGCTTAGGAGAGTTGTTCTCCACACAGCTGGGCACCAGAAGCAGCCAG  
GCACCATGCATGGAGTCAGCCATTTCTCTAGGAACCTTGATTCTGTCTG  
GCACCAATACATGGGGGAAAAATGGGAAAGAAGCGTTCCGGGTAGCCATG  
GACCTCCTTTAAATCCATAAATTCAGCCGGGTGAGGTGGCTCATGCCCGG  
TCCTGCAGAACCTTAGACTCGTGTATTAAGTACGATTACCCAGCACTTGC  
GGCAAAGCCAAGAACCCTCGTGGGCTAAAACCCCGCTTGGGGCTTAAAG  
GCAGACATAGAAAGGGGCAAAGTCTTGGTGGTGCCTGTAATCCAG  
CCCACACGGTGCCATGGTTTAATTATTCCCAGCTCTACTTTTGGGAGCC  
GAAGCTTCTCTGTGGGTGGATGCTGCCAAGATGATGGGGCTGCAGCTGTC  
GGCAGGAAAATTGTATGTCAGGGTGTATTTCTGTGTGGGGTTGCAAGGGC  
CACTGGCTGGGTATGGTGGCTCACGCCCCATTTACTTTTTAGCAACAATG  
GCCTCTAACCATCAGGAATGCCATAAGTATAGACCCTGTCTTGGGAGAG  
CCTCCCAGAAGAAGTCAGTGGGAAGAGATGGCCAGGGGAGGAAGTGGGT  
TCCCTGGGGTCCCCTTTTTACTTTTTCCAGCCACAGAGATGAGACATTAG  
GCACTCTAGACCTAAGTTGTCCAATATGGTAGCCACTTGCCACATGTGAC  
GACCCGCGGCAGACAGTCTCGAATCCTGGAGTTTTCTCTGCTCAACCT  
CGTGGCAGGTGTACATCTTGCTCCCTTAAATGAATGCTCCTTGACCACTC  
GATATCACACCCACACAGTAGCGTCTTTGTATTTGGGTGATGGTAAGATG  
GTGCTTGAAAGGGCCAGGGGAAGGCTATTGTCTGCTCGACAAGTTACT  
CTGGCATGGGACTGGCTAGGTTCAAATCCAGAGAGCATGGGTTTATACAC  
GAGTCCGGCTCCAGCCAGTAAAGGGTCAACTCAGCTCTGAATGTTGGGAG  
CTCAGGGAAGTTAAGCATGTTCCGGCCCTCCAGATTTGCGGATTCATCATC  
GACTACCCATTCCGTCTATTATCAACACTCAGATGTGAAAGGCTAAGCA  
GGATGATGAGAGGGAACATCTTTGCCCGCTTCTGATCTTAGTGGGAAAG  
ACACAACCTACACAGCCTCTCTGTTTCAAATACATGCACTGAACCTCCC  
GCAGTCACTAGGGCCATAAGTCAAATGCTCAGAGTCTTGAGACAGTCGCC  
GCTGACAAGGAAGTAAGCCAAGCAGAGGGAGGATAGAACATTGCAGGTGG  
CTGCTTCCCTCTCCGCATTTAAGGACGCTGTGATTGCATTAGACCCACC  
CACAGCCCGTTCTTAAGTCTCACAGTACACCCAAAGCCCCTTACCCTGC  
CGAGAAAAGGGTGCCCCAAGCCACGAGGGTAACATGAGCTATGGCAGTCG  
ACCCACTGTTTCCCTGTGTTTCTGCCAGTAGAAGGTTCTGGATGTGCC  
CCAGGTGCCGCCACTCTTGACGTGATACTTACCGTCAATGCTCCTTACC  
CAAAATTCTCCGTAGCAACTACCCACTTTGCAGTTTATGTGATCCACAC  
GGCTGGTTATCAGGAGTGGCCTGTCCCAAAGCAAATGCTGCATGAGGGTG  
GCGGGGAAACTCCCAGTAGGCGCTGCTGTCCAGGGAAAATGATGGGCTTT  
CATGCCTAGTGCTGCCCCAGTGCAGATGCTCAGGAAATATCGTCCTTAC  
CAAGTTCTTAACCATCCCGGGTCCAGTGGTTACAGAGTTCTGCCCTGGG  
CTGAGTAGGCCGGACTCGTGTGGCTCACGCCTGTAATCCCAGATGCTGTT  
GGGACCATTCTGTTTGGTTCTCCATTGTACCCTCAGAACTTATGCAGTC  
CTGGAATTCAGTACGTGAGGACTTGGACTTGGTGGGCACAGAATGCATCT  
CCGGTCCTTTCAAAGCGATGTGTGGACTCGACTTTGACCAAACCCCTCCC  
AGCCTGTGAGTGAAGATCTGGTTCAGGAGTACACTGGGAAATTGTCTGGC  
CATCGTCTTACAGCCGCTCGTCAGACTCCAGCAGCCAAGATGGTGAAG

**Probe\_Chr\_Orientation****Probe\_Coordinates**

|   |                                     |
|---|-------------------------------------|
| + | 74340137-74340186                   |
| - | 38299200-38299203:38301057-38301102 |
| - | 229729706-229729755                 |
| - | 51285425-51285474                   |
| - | 130443163-130443212                 |
| + | 3257423-3257472                     |
| + | 93094373-93094422                   |
|   |                                     |
| + | 8293227-8293276                     |
| + | 91411148-91411197                   |
| - | 44615731-44615752:44615753-44615780 |
| - | 185184354-185184403                 |
| + | 113471394-113471443                 |
| - | 70442883-70442884:70443063-70443110 |
|   |                                     |
| + | 36153798-36153847                   |
| - | 20078363-20078412                   |
| - | 3720269-3720318                     |
| - | 4316893-4316942                     |
|   |                                     |
| - | 47980580-47980629                   |
| - | 75454418-75454425:75454426-75454467 |
| + | 75346964-75347013                   |
| + | 137348860-137348909                 |
| + | 53063842-53063891                   |
| + | 44597523-44597572                   |
| - | 101900852-101900901                 |
| + | 58332875-58332924                   |
| - | 24652407-24652456                   |
| - | 90407224-90407273                   |

+ 245748661-245748710  
- 3756-3805  
- 148080892-148080941  
+ 6486367-6486368:6486995-6487042  
+ 60710651-60710700  
  
+ 152229888-152229896:152229897-152229902:152230215-152230249  
- 68336908-68336957  
- 28306729-28306778  
+ 1388309-1388358  
  
+ 19558234-19558283  
- 34634020-34634069  
+ 17128570-171285619  
- 12664737-12664786  
+ 22371126-22371175  
+ 82593742-82593791  
+ 180037176-180037225  
+ 107346975-107347024  
- 23897916-23897965  
- 148051810-148051859  
  
+ 22664611-22664660  
- 247071517-247071566  
+ 61085713-61085762  
+ 34459695-34459744  
- 52083405-52083454  
+ 100520197-100520246  
+ 12331650-12331699  
- 23592413-23592462  
+ 11337048-11337097  
- 45720017-45720066  
+ 111903182-111903231  
- 114859890-114859939  
+ 134107742-134107791  
  
- 51243958-51244007  
- 66796993-66797042  
+ 157084272-157084321  
  
+ 20210812-20210861  
- 174921573-174921622  
  
- 46295471-46295520  
- 230759010-230759059  
+ 126200169-126200218  
+ 76166279-76166328

- 76866031-76866080  
- 88514916-88514965  
- 97394601-97394650  
- 1491641-1491690  
- 137560553-137560602  
- 146068544-146068593  
- 53295365-53295414  
+ 241905635-241905684  
+ 8565844-8565893  
  
- 184908064-184908113  
  
+ 23252401-23252450  
+ 31198110-31198159  
+ 47416014-47416063  
- 133574936-133574985  
- 133106828-133106877  
- 179950251-179950300  
  
- 41873670-41873719  
- 112053558-112053563:112058513-112058536:112058537-112058556  
- 145585935-145585984  
  
- 48763124-48763173  
- 104837929-104837978  
- 103936333-103936382  
  
+ 205317527-205317576  
- 153767258-153767307  
- 114881070-114881119  
  
- 185913945-185913994  
- 48220757-48220806  
- 93486339-93486388  
  
+ 37676117-37676166  
- 101598419-101598468  
- 103534340-103534389  
+ 219124373-219124422  
- 45721550-45721599  
+ 113784584-113784633  
- 27865202-27865251  
  
+ 48241909-48241918:48241919-48241958  
+ 26360209-26360238:26360239-26360258  
+ 3012033-3012082

+ 38159368-38159417  
- 20993986-20994035  
- 191548621-191548670  
  
- 48842368-48842417  
- 3067402-3067451  
+ 27273891-27273940  
- 19682836-19682885  
+ 31031334-31031383  
+ 65170462-65170511  
+ 232955648-232955697  
+ 67924838-67924858:67925932-67925960  
- 8227510-8227553:8233793-8233798  
  
- 49122497-49122517:49122753-49122781  
+ 148089810-148089859  
- 104816333-104816382  
- 177962642-177962691  
  
- 50441973-50442022  
+ 10514353-10514402  
+ 81530777-81530826  
- 223143575-223143624  
  
+ 48319749-48319749:48319750-48319751:48319840-48319886  
  
+ 91149642-91149691  
  
+ 13481379-13481428  
  
- 10174011-10174060  
+ 174535022-174535053:174535054-174535071  
- 13918925-13918974  
- 151166817-151166866  
+ 70023312-70023361  
+ 43834109-43834158  
- 24150565-24150568:24152574-24152603:24152604-24152619  
  
- 118566707-118566756  
+ 12907768-12907817  
- 3934-3983  
- 37187233-37187282  
  
- 32161087-32161136  
- 37770607-37770656  
+ 29289975-29290024

- 142556030-142556079  
+ 191047547-191047596  
-  
- 67689479-67689528  
- 44510871-44510920  
- 56780689-56780735:56780736-56780738  
+ 65144146-65144195  
+ 132565798-132565847  
- 143072183-143072232  
+ 2962146-2962195  
- 69712823-69712872  
- 151773806-151773855  
- 148397711-148397760  
  
- 178071321-178071370  
  
+ 72067992-72068041  
+ 9998450-9998477:9998478-9998499  
- 48399408-48399457  
  
- 158517590-158517639  
- 94892061-94892110  
+ 63928321-63928370  
  
- 76970258-76970307  
- 229535630-229535679  
- 34816549-34816598  
  
+ 70564812-70564861  
+ 23855914-23855963  
+ 74973428-74973477  
- 54546773-54546822  
+ 97673262-97673311  
+ 1716348-1716357:1716473-1716512  
+ 75103777-75103826  
+ 42795187-42795191:42795819-42795832:42795833-42795846:42797097-42797:  
+ 32030109-32030158  
+ 93213090-93213139  
+ 39061214-39061263  
+ 99472880-99472929  
- 159860148-159860197  
+ 28692285-28692292:28692293-28692334  
+ 15970908-15970957  
- 157024937-157024986  
- 179326416-179326465

+ 1818688-1818714:1818837-1818859  
- 151629237-151629286  
+ 71528496-71528523:71528524-71528545  
+ 14806601-14806650  
+ 27841663-27841712  
- 38474336-38474385  
+ 75909314-75909363  
- 8226343-8226353:8226354-8226358:8227200-8227233  
+ 116133696-116133745  
- 46820864-46820913  
+ 177409019-177409068  
+ 44290026-44290075  
- 3811452-3811501  
- 77415032-77415081  
- 3918-3967  
- 38041724-38041773  
+ 15634207-15634256  
+ 13391737-13391773:13394357-13394369  
- 52892908-52892957  
- 17183199-17183248  
- 49120092-49120134:49120135-49120141  
+ 40646836-40646885  
- 193631-193680  
- 130058218-130058267  
+ 89330079-89330128  
- 12124760-12124809  
+ 52968633-52968682  
- 13869775-13869824  
- 78692404-78692453  
+ 135643839-135643888  
- 89852902-89852908:89854102-89854144  
+ 60091988-60092037  
- 59290134-59290183  
+ 10289291-10289340  
+ 64481496-64481545  
  
+ 202785830-202785879  
- 32597972-32597996:32597997-32598021  
+ 55386776-55386825  
- 157979818-157979867  
+ 8382616-8382665  
+ 176425940-176425989  
+ 75006821-75006870  
+ 22556843-22556892  
+ 48486565-48486614  
  
- 151612983-151613032  
+ 165941667-165941716

+ 1388406-1388455

- 31715625-31715674

+ 81587223-81587233:81596237-81596275

- 42915789-42915838

- 42178233-42178282

+ 158439222-158439271

- 13116239-13116288

- 30360904-30360953

- 45889570-45889619

- 52320501-52320550

- 197568143-197568192

+ 138775797-138775846

+ 38114867-38114916

- 34260200-34260249

+ 20225225-20225274

  

+ 107720716-107720765

+ 69730861-69730910

+ 190421210-190421259

- 32906458-32906507

+ 151993740-151993789

- 22002600-22002649

+ 70533801-70533850

- 27732933-27732982

- 14589154-14589203

- 148866616-148866665

- 121578995-121579044

+ 61282171-61282220

- 89219327-89219376

- 26655419-26655468

- 109204764-109204813

- 88129409-88129458

  

- 239635447-239635496

- 42355401-42355450

  

- 127780308-127780357

+ 111971650-111971699

+ 113433823-113433844:113468916-113468943

+ 72657673-72657722

- 181862120-181862169

- 31836086-31836135

- 33021836-33021885

- 12856899-12856948

- 55431745-55431766:55431767-55431794

  

+ 15342563-15342566:15342567-15342612



- 43502841-43502890

+ 60706623-60706672

+ 42861220-42861269

- 8577850-8577899

+ 54527196-54527245

+ 7309013-7309062

+ 154846536-154846585

- 37875474-37875523

- 34940976-34941017:34941351-34941358

+ 110552004-110552053

- 36019743-36019792

- 196772392-196772441

+ 14326989-14327038

- 110714861-110714910

+ 39045111-39045119:39047075-39047115

- 32901537-32901586

- 111519243-111519292

- 85379025-85379074

+ 61941594-61941643

- 23784959-23785008

- 60232730-60232779

- 16829066-16829115

- 57945667-57945716

- 75269880-75269929

+ 218709902-218709951

- 46828278-46828327

+ 180365765-180365814

- 219823282-219823317:219823318-219823331

+ 123775641-123775690

+ 52026216-52026265

- 53042762-53042811

- 69239594-69239643

+ 2269595-2269644

+ 120505381-120505430

- 203398622-203398648:203398422-203398444

+ 111882076-111882125

+ 74955506-74955555

- 5426395-5426444

- 15454347-15454396

+ 26207885-26207934  
+ 83500277-83500326  
+ 29648-29697  
- 105156317-105156366  
+ 100100006-100100055  
- 102241107-102241156  
+ 93779668-93779717  
+ 37978594-37978643  
- 71639809-71639858  
- 148067255-148067304  
+ 77044806-77044855  
+ 165651657-165651671:165651672-165651706  
- 155749982-155750031  
+ 15477974-15478023  
+ 44078320-44078369  
+ 54174433-54174482  
- 181791603-181791652  
+ 13313238-13313287  
+ 101876927-101876976  
+ 30236347-30236396  
+ 32935355-32935404  
+ 5923495-5923544  
- 35908947-35908996  
+ 65179379-65179428  
+ 219054033-219054082  
+ 18576492-18576541  
- 90572750-90572755:90573017-90573060  
+ 11411493-11411542

+ 6749666-6749670:6749671-6749715  
- 48463849-48463898  
- 39484301-39484350  
+ 128882396-128882445  
- 92520593-92520642  
- 198642746-198642768:198642769-198642795  
+ 39243212-39243261  
- 66859320-66859369

+ 20171476-20171525

- 46552207-46552256  
- 81930715-81930764  
+ 17562982-17563031  
- 35677307-35677356  
+ 115981532-115981581

- 100073632-100073681  
- 16526589-16526638  
  
+ 36307365-36307414  
- 34185801-34185846:34185847-34185850  
- 119017395-119017444  
+ 17351414-17351463  
+ 43947237-43947286  
  
- 230744660-230744709  
- 99926695-99926744  
- 112851351-112851400  
+ 154893513-154893562  
- 33779905-33779937:33782011-33782027  
  
+ 49263889-49263938  
- 74241769-74241773:74242870-74242911:74244194-74244196



## Definition

PREDICTED: Homo sapiens region containing similar to Williams Beuren syndrome chromosome region 19; hyp

PREDICTED: Homo sapiens hypothetical protein LOC642035 (LOC642035), mRNA.

PREDICTED: Homo sapiens hypothetical protein LOC641825 (LOC641825), mRNA.

PREDICTED: Homo sapiens hypothetical protein LOC283547 (LOC283547), mRNA.

PREDICTED: Homo sapiens similar to hypothetical LOC389634 (LOC654053), mRNA.

PREDICTED: Homo sapiens hypothetical LOC440731, transcript variant 2 (LOC440731), mRNA.

PREDICTED: Homo sapiens hypothetical protein LOC647834 (LOC647834), mRNA.

PREDICTED: Homo sapiens hypothetical protein FLJ37307 (FLJ37307), misc RNA.

PREDICTED: Homo sapiens hypothetical protein LOC649753, transcript variant 1 (LOC649754), mRNA.

PREDICTED: Homo sapiens hypothetical protein FLJ43663, transcript variant 2 (FLJ43663), mRNA.

PREDICTED: Homo sapiens hypothetical protein FLJ12078 (FLJ12078), misc RNA.

PREDICTED: Homo sapiens hypothetical protein FLJ39639 (FLJ39639), mRNA.

Homo sapiens small Cajal body-specific RNA 9 (SCARNA9) on chromosome 11.

UI-H-BI3-akp-h-05-0-UI.s1 NCI\_CGAP\_Sub5 Homo sapiens cDNA clone IMAGE:2735097 3, mRNA sequence

Homo sapiens cDNA: FLJ23098 fis, clone LNG07440

PREDICTED: Homo sapiens hypothetical LOC389089 (LOC389089), mRNA

Homo sapiens clone KU010717 unknown mRNA

Homo sapiens cDNA: FLJ22140 fis, clone HEP20977

UI-CF-FN0-afp-n-21-0-UI.s1 UI-CF-FN0 Homo sapiens cDNA clone UI-CF-FN0-afp-n-21-0-UI 3, mRNA sequence

603071853F1 NIH\_MGC\_119 Homo sapiens cDNA clone IMAGE:5163756 5, mRNA sequence

PREDICTED: Homo sapiens hypothetical gene supported by AY007155 (LOC439949), mRNA

BX103256 Soares\_parathyroid\_tumor\_NbHPA Homo sapiens cDNA clone IMAGp998J244235, mRNA sequence

Homo sapiens cDNA FLJ41270 fis, clone BRAMY2036387

Homo sapiens thioredoxin (TXN), mRNA.

Homo sapiens ribosomal protein S28 (RPS28), mRNA.

Homo sapiens growth arrest and DNA-damage-inducible, gamma (GADD45G), mRNA.

Homo sapiens ribosomal protein S16 (RPS16), mRNA.

Homo sapiens ATP-binding cassette, sub-family C (CFTR/MRP), member 5 (ABCC5), transcript variant 2, mRNA

Homo sapiens guanine nucleotide binding protein (G protein), gamma 10 (GNG10), mRNA.

Homo sapiens LMBR1 domain containing 1 (LMBRD1), mRNA.

PREDICTED: Homo sapiens similar to 40S ribosomal protein S29 (LOC647361), mRNA.

Homo sapiens chromosome 9 open reading frame 19 (C9orf19), mRNA.

Homo sapiens ribosomal protein S6 kinase, 90kDa, polypeptide 3 (RPS6KA3), mRNA.

Homo sapiens retina and anterior neural fold homeobox like 1 (RAXL1), mRNA.

PREDICTED: Homo sapiens similar to Ssu72 RNA polymerase II CTD phosphatase homolog (LOC390033), mRNA

Homo sapiens pre-B-cell colony enhancing factor 1 (PBEF1), mRNA.

PREDICTED: Homo sapiens hypothetical protein LOC644250 (LOC644250), mRNA.

Homo sapiens transmembrane protein induced by tumor necrosis factor alpha (TMPIT), mRNA.

Homo sapiens plasminogen activator, urokinase (PLAU), mRNA.

Homo sapiens protein phosphatase 2 (formerly 2A), regulatory subunit B", alpha (PPP2R3A), transcript variant

Homo sapiens zyg-11 homolog B (C. elegans) (ZYG11B), mRNA.

Homo sapiens CD82 molecule (CD82), transcript variant 1, mRNA.

Homo sapiens polymerase (RNA) II (DNA directed) polypeptide J, 13.3kDa (POLR2J), mRNA.

Homo sapiens hypothetical protein LOC284757 (LOC284757), mRNA.

Homo sapiens KIAA0319 (KIAA0319), mRNA.

Homo sapiens ribosomal protein S6 kinase, 90kDa, polypeptide 5 (RPS6KA5), transcript variant 1, mRNA.

Homo sapiens multiple EGF-like-domains 9 (MEGF9), mRNA.

PREDICTED: Homo sapiens hypothetical LOC644852, transcript variant 2 (LOC644852), mRNA.

PREDICTED: Homo sapiens similar to CXYorf1-related protein (LOC653635), mRNA.

Homo sapiens histone cluster 2, H2aa3 (HIST2H2AA3), mRNA.

Homo sapiens thioredoxin-like 5 (TXNL5), mRNA.

PREDICTED: Homo sapiens similar to hypothetical protein MGC40405, transcript variant 1 (LOC653158), mRNA.

PREDICTED: Homo sapiens p21 (CDKN1A)-activated kinase 2 (PAK2), mRNA.

Homo sapiens ribosomal protein S27 (metallopanstimulin 1) (RPS27), mRNA.

Homo sapiens G protein-coupled receptor 177 (GPR177), transcript variant 2, mRNA.

PREDICTED: Homo sapiens similar to eukaryotic translation initiation factor 3, subunit 8, transcript variant 12 (LOC646424), mRNA.

Homo sapiens colony stimulating factor 2 receptor, alpha, low-affinity (granulocyte-macrophage) (CSF2RA), transcript variant 1, mRNA.

PREDICTED: Homo sapiens hypothetical LOC646424 (LOC646424), mRNA.

Homo sapiens zinc finger, MYM-type 2 (ZMYM2), mRNA.

Homo sapiens protein phosphatase 2 (formerly 2A), regulatory subunit B'', gamma (PPP2R3C), mRNA.

Homo sapiens G protein-coupled receptor 160 (GPR160), mRNA.

Homo sapiens hypothetical protein FLJ11151 (FLJ11151), mRNA.

Homo sapiens Ral-GDS related protein Rgr (Rgr), mRNA.

Homo sapiens EF-hand calcium binding protein 2 (EFCBP2), mRNA.

Homo sapiens calcium channel, voltage-dependent, R type, alpha 1E subunit (CACNA1E), mRNA.

Homo sapiens dihydrolipoamide dehydrogenase (DLD), mRNA.

Homo sapiens unc-119 homolog (C. elegans) (UNC119), transcript variant 1, mRNA.

PREDICTED: Homo sapiens similar to H3 histone, family 2 isoform 2 (LOC653604), mRNA.

Homo sapiens transmembrane BAX inhibitor motif containing 4 (TMBIM4), mRNA.

Homo sapiens WD repeat and SOCS box-containing 1 (WSB1), transcript variant 1, mRNA.

Homo sapiens SH3-binding domain protein 5-like (SH3BP5L), mRNA.

Homo sapiens ubiquitin specific peptidase 15 (USP15), mRNA.

PREDICTED: Homo sapiens similar to SMT3 suppressor of mif two 3 homolog 2 (LOC390466), mRNA.

Homo sapiens AKT interacting protein (AKTIP), transcript variant 2, mRNA.

Homo sapiens tripartite motif-containing 56 (TRIM56), mRNA.

Homo sapiens cell division cycle 123 homolog (S. cerevisiae) (CDC123), mRNA.

Homo sapiens NK3 transcription factor related, locus 1 (Drosophila) (NKX3-1), mRNA.

Homo sapiens lipid phosphate phosphatase-related protein type 2 (LPPR2), mRNA.

Homo sapiens sulfatase 2 (SULF2), transcript variant 2, mRNA.

Homo sapiens interferon-related developmental regulator 1 (IFRD1), transcript variant 1, mRNA.

PREDICTED: Homo sapiens similar to SMT3 suppressor of mif two 3 homolog 2 (LOC728825), mRNA.

Homo sapiens netrin G2 (NTNG2), mRNA.

PREDICTED: Homo sapiens similar to F15D3.1a (LOC391475), mRNA.

Homo sapiens dehydrogenase/reductase (SDR family) member 12 (DHRS12), transcript variant 1, mRNA.

Homo sapiens phosphodiesterase 7A (PDE7A), transcript variant 2, mRNA.

Homo sapiens myeloid cell nuclear differentiation antigen (MNDA), mRNA.

Homo sapiens AT rich interactive domain 3A (BRIGHT-like) (ARID3A), mRNA.

Homo sapiens chromosome Y open reading frame 15A (CYorf15A), mRNA.

Homo sapiens CBF1 interacting corepressor (CIR), mRNA.

Homo sapiens chloride channel CLIC-like 1 (CLCC1), transcript variant 1, mRNA.

Homo sapiens transducer of ERBB2, 1 (TOB1), mRNA.

Homo sapiens SP110 nuclear body protein (SP110), transcript variant b, mRNA.

Homo sapiens lamin B1 (LMNB1), mRNA.

Homo sapiens coagulation factor II (thrombin) receptor-like 1 (F2RL1), mRNA.

PREDICTED: Homo sapiens similar to Fc fragment of IgG, low affinity IIIa, receptor for (CD16) (LOC652578), mRNA.

Homo sapiens chromosome 9 open reading frame 95 (C9orf95), mRNA.

Homo sapiens hydroxysteroid (17-beta) dehydrogenase 11 (HSD17B11), mRNA.

Homo sapiens hypothetical gene supported by BC044942 (LOC441268), mRNA.

Homo sapiens signal-regulatory protein beta 1 (SIRPB1), mRNA.

Homo sapiens interferon gamma receptor 1 (IFNGR1), mRNA.

PREDICTED: Homo sapiens neuroblastoma breakpoint family, member 9, transcript variant 26 (NBPF9), mRNA.

Homo sapiens CUE domain containing 1 (CUEDC1), mRNA.

Homo sapiens septin 2 (SEPT2), transcript variant 1, mRNA.

Homo sapiens C-type lectin domain family 4, member D (CLEC4D), mRNA.

PREDICTED: Homo sapiens similar to 60S ribosomal protein L21 (LOC731706), mRNA.

Homo sapiens prostaglandin-endoperoxide synthase 2 (prostaglandin G/H synthase and cyclooxygenase) (PTG

Homo sapiens RAB24, member RAS oncogene family (RAB24), transcript variant 2, mRNA.

Homo sapiens membrane metallo-endopeptidase (MME), transcript variant 2a, mRNA.

Homo sapiens ureidopropionase, beta (UPB1), mRNA.

Homo sapiens TAF15 RNA polymerase II, TATA box binding protein (TBP)-associated factor, 68kDa (TAF15), tra

Homo sapiens brain cytoplasmic RNA 1, Bc1 analog (mouse) (BCYRN1) on chromosome 2.

Homo sapiens Rap guanine nucleotide exchange factor (GEF) 1 (RAPGEF1), transcript variant 2, mRNA.

Homo sapiens vanin 2 (VNN2), transcript variant 2, mRNA.

Homo sapiens secretoglobin, family 3A, member 1 (SCGB3A1), mRNA.

PREDICTED: Homo sapiens similar to ribosomal protein S12 (LOC651894), mRNA.

Homo sapiens ubiquitin specific peptidase 49 (USP49), mRNA.

Homo sapiens thioredoxin (TXN), mRNA.

Homo sapiens acid phosphatase 6, lysophosphatidic (ACP6), mRNA.

PREDICTED: Homo sapiens hypothetical protein LOC650919 (LOC650919), mRNA.

Homo sapiens protein kinase, cAMP-dependent, regulatory, type II, alpha (PRKAR2A), mRNA.

Homo sapiens 5'-nucleotidase, cytosolic II (NT5C2), mRNA.

Homo sapiens ubiquitin-conjugating enzyme E2D 3 (UBC4/5 homolog, yeast) (UBE2D3), transcript variant 5, m

Homo sapiens pre-B-cell leukemia homeobox 2 (PBX2), mRNA.

Homo sapiens 6-phosphofructo-2-kinase/fructose-2,6-biphosphatase 2 (PFKFB2), transcript variant 1, mRNA.

Homo sapiens transmembrane protein 154 (TMEM154), mRNA.

Homo sapiens thyroid hormone receptor associated protein 2 (THRAP2), mRNA.

Homo sapiens N-acylsphingosine amidohydrolase (acid ceramidase) 1 (ASAH1), transcript variant 1, mRNA.

Homo sapiens acyl-CoA synthetase long-chain family member 1 (ACSL1), mRNA.

Homo sapiens pregnancy specific beta-1-glycoprotein 11 (PSG11), transcript variant 1, mRNA.

Homo sapiens transmembrane and coiled-coil domain family 3 (TMCC3), mRNA.

Homo sapiens chromosome 15 open reading frame 51 (C15orf51) on chromosome 15.

Homo sapiens thrombospondin 1 (THBS1), mRNA.

Homo sapiens solute carrier organic anion transporter family, member 4C1 (SLCO4C1), mRNA.

Homo sapiens meningioma expressed antigen 5 (hyaluronidase) (MGEA5), mRNA.

Homo sapiens H2.0-like homeobox 1 (Drosophila) (HLX1), mRNA.

Homo sapiens sulfatase 2 (SULF2), transcript variant 1, mRNA.

Homo sapiens RNA binding motif protein 7 (RBM7), mRNA.

Homo sapiens interferon, alpha-inducible protein 6 (IFI6), transcript variant 1, mRNA.

PREDICTED: Homo sapiens similar to ribosomal protein S12 (LOC651894), mRNA.

PREDICTED: Homo sapiens protein tyrosine phosphatase type IVA, member 2, transcript variant 9 (PTP4A2), m

Homo sapiens cathelicidin antimicrobial peptide (CAMP), mRNA.

Homo sapiens histone cluster 1, H2bh (HIST1H2BH), mRNA.

Homo sapiens tumor necrosis factor receptor superfamily, member 12A (TNFRSF12A), mRNA.

Homo sapiens chromosome 19 open reading frame 40 (C19orf40), mRNA.

Homo sapiens protein tyrosine phosphatase-like A domain containing 2 (PTPLAD2), mRNA.

Homo sapiens signal transducer and activator of transcription 1, 91kDa (STAT1), transcript variant beta, mRNA

PREDICTED: Homo sapiens proteasome (prosome, macropain) 26S subunit, non-ATPase, 12 (PSMD12), mRNA.

Homo sapiens plasminogen activator, urokinase receptor (PLAUR), transcript variant 2, mRNA.

PREDICTED: Homo sapiens hypothetical protein LOC646064 (LOC646064), mRNA.

Homo sapiens interleukin 4 receptor (IL4R), transcript variant 2, mRNA.

Homo sapiens zinc finger protein 14 (ZNF14), mRNA.

Homo sapiens branched chain ketoacid dehydrogenase kinase (BCKDK), mRNA.

Homo sapiens CKLF-like MARVEL transmembrane domain containing 1 (CMTM1), transcript variant 23, mRNA.

Homo sapiens alkaline phosphatase, placental (Regan isozyme) (ALPP), mRNA.

Homo sapiens growth arrest and DNA-damage-inducible, alpha (GADD45A), mRNA.

Homo sapiens islet cell autoantigen 1, 69kDa (ICA1), transcript variant 3, mRNA.

Homo sapiens clathrin, heavy chain-like 1 (CLTCL1), mRNA.

Homo sapiens ribosomal protein S29 (RPS29), transcript variant 1, mRNA.

PREDICTED: Homo sapiens similar to Histone H2A.o (H2A/o) (H2A.2) (H2a-615) (LOC653610), mRNA.

Homo sapiens SFRS protein kinase 2 (SRPK2), transcript variant 1, mRNA.

Homo sapiens CDC-like kinase 4 (CLK4), mRNA.

PREDICTED: Homo sapiens similar to M-phase phosphoprotein, mpp8 (LOC642333), mRNA.

Homo sapiens membrane metallo-endopeptidase (MME), transcript variant 1, mRNA.

Homo sapiens phosphorylase, glycogen; liver (Hers disease, glycogen storage disease type VI) (PYGL), mRNA.

Homo sapiens ropporin 1-like (ROPN1L), mRNA.

Homo sapiens transducin-like enhancer of split 4 (E(sp1) homolog, Drosophila) (TLE4), mRNA.

Homo sapiens phenylalanine-tRNA synthetase-like, beta subunit (FARSLB), mRNA.

PREDICTED: Homo sapiens similar to protein immuno-reactive with anti-PTH polyclonal antibodies (LOC64984)

Homo sapiens RNA binding motif (RNP1, RRM) protein 3 (RBM3), transcript variant 3, mRNA.

PREDICTED: Homo sapiens H3 histone, family 3A pseudogene, transcript variant 3 (LOC440926), misc RNA.

Homo sapiens interferon-induced protein with tetratricopeptide repeats 1 (IFIT1), transcript variant 2, mRNA.

PREDICTED: Homo sapiens similar to Williams Beuren syndrome chromosome region 19, transcript variant 8 (L

Homo sapiens ubiquitin specific peptidase 9, Y-linked (fat facets-like, Drosophila) (USP9Y), mRNA.

PREDICTED: Homo sapiens similar to Zinc finger protein 418 (LOC400721), mRNA.

Homo sapiens C-type lectin domain family 7, member A (CLEC7A), transcript variant 8, mRNA.

Homo sapiens Sin3A-associated protein, 30kDa (SAP30), mRNA.

Homo sapiens ubiquitously transcribed tetratricopeptide repeat gene, Y-linked (UTY), transcript variant 2, mRI

Homo sapiens profilin 2 (PFN2), transcript variant 1, mRNA.

Homo sapiens MAX dimerization protein 1 (MXD1), mRNA.

Homo sapiens hydroxysteroid (17-beta) dehydrogenase 12 (HSD17B12), mRNA.

Homo sapiens splicing factor 3B, 14 kDa subunit (SF3B14), mRNA.

PREDICTED: Homo sapiens similar to H3 histone, family 3B (LOC347376), mRNA.

Homo sapiens hypothetical protein LOC283152 (LOC283152), mRNA.

Homo sapiens calcium/calmodulin-dependent protein kinase ID (CAMK1D), transcript variant 1, mRNA.

PREDICTED: Homo sapiens similar to CXYorf1-related protein (LOC653635), mRNA.

Homo sapiens eukaryotic translation initiation factor 2-alpha kinase 2 (EIF2AK2), mRNA.

Homo sapiens bridging integrator 3 (BIN3), mRNA.

Homo sapiens golgi phosphoprotein 3 (coat-protein) (GOLPH3), mRNA.

Homo sapiens exosome component 3 (EXOSC3), transcript variant 2, mRNA.

Homo sapiens RUN domain containing 2B (RUNDC2B), mRNA.

PREDICTED: Homo sapiens similar to CG7889-PA, transcript variant 2 (LOC647499), mRNA.



PREDICTED: Homo sapiens similar to peptidylprolyl isomerase A (cyclophilin A)-like 4 (LOC644591), mRNA.  
Homo sapiens regulator of G-protein signalling 2, 24kDa (RGS2), mRNA.  
PREDICTED: Homo sapiens similar to Ran-binding protein 2 (RanBP2) (Nuclear pore complex protein Nup358) (LOC645895), mRNA.  
PREDICTED: Homo sapiens hypothetical protein LOC645895 (LOC645895), mRNA.  
Homo sapiens glia maturation factor, gamma (GMFG), mRNA.  
PREDICTED: Homo sapiens similar to Ubiquinol-cytochrome c reductase complex 14 kDa protein (Complex III subunit 1) (LOC645895), mRNA.  
Homo sapiens chemokine-like factor (CKLF), transcript variant 3, mRNA.  
Homo sapiens nudix (nucleoside diphosphate linked moiety X)-type motif 16 pseudogene (NUDT16P) on chromosome 16 (NUDT16P), mRNA.  
PREDICTED: Homo sapiens similar to peptidylprolyl isomerase A (cyclophilin A)-like 4 (LOC653505), mRNA.  
Homo sapiens NAD(P)H dehydrogenase, quinone 2 (NQO2), mRNA.  
Homo sapiens phenazine biosynthesis-like protein domain containing (PBLD), transcript variant 1, mRNA.  
Homo sapiens S100 calcium binding protein A6 (S100A6), mRNA.  
Homo sapiens zinc finger protein 786 (ZNF786), mRNA.  
PREDICTED: Homo sapiens family with sequence similarity 101, member B (FAM101B), mRNA.  
Homo sapiens family with sequence similarity 101, member B (FAM101B), mRNA.  
Homo sapiens zinc finger protein 354A (ZNF354A), mRNA.  
Homo sapiens S100 calcium binding protein A9 (S100A9), mRNA.  
PREDICTED: Homo sapiens hypothetical protein LOC440160 (LOC440160), mRNA.  
Homo sapiens opioid growth factor receptor-like 1 (OGFRL1), mRNA.  
Homo sapiens retinol binding protein 7, cellular (RBP7), mRNA.  
Homo sapiens chromosome 22 open reading frame 34 (C22orf34), mRNA.  
Homo sapiens poliovirus receptor-related 2 (herpesvirus entry mediator B) (PVRL2), transcript variant alpha, n (PVRL2), mRNA.  
Homo sapiens hypothetical protein FLJ31951 (FLJ31951), mRNA.  
Homo sapiens histidine ammonia-lyase (HAL), mRNA.  
Homo sapiens arylsulfatase G (ARSG), mRNA.  
Homo sapiens ubiquitin specific peptidase 10 (USP10), mRNA.  
PREDICTED: Homo sapiens colony stimulating factor 2 receptor, alpha, low-affinity (granulocyte-macrophage colony-stimulating factor receptor 2) (CSF2RA), mRNA.  
Homo sapiens implantation-associated protein (DKFZp564K142), mRNA.  
Homo sapiens exocyst complex component 8 (EXOC8), mRNA.  
Homo sapiens PPAR binding protein (PPARBP), mRNA.  
PREDICTED: Homo sapiens dehydrogenase/reductase (SDR family) member 8 (DHRS8), mRNA.  
PREDICTED: Homo sapiens similar to nuclear pore membrane protein 121 (LOC728575), mRNA.  
Homo sapiens leukotriene B4 receptor (LTB4R), mRNA.  
Homo sapiens hexokinase 2 (HK2), mRNA.  
Homo sapiens similar to 60S ribosomal protein L21 (LOC402176), mRNA.  
Homo sapiens lemur tyrosine kinase 2 (LMTK2), mRNA.  
Homo sapiens transforming, acidic coiled-coil containing protein 3 (TACC3), mRNA.  
Homo sapiens lymphocyte antigen 96 (LY96), mRNA.  
Homo sapiens beta-2-microglobulin (B2M), mRNA.  
Homo sapiens chromosome 12 open reading frame 35 (C12orf35), mRNA.  
Homo sapiens HECT domain containing 2 (HECTD2), transcript variant 2, mRNA.  
Homo sapiens trinucleotide repeat containing 6B (TNRC6B), transcript variant 2, mRNA.  
Homo sapiens zinc finger with KRAB and SCAN domains 1 (ZKSCAN1), mRNA.  
Homo sapiens Fc fragment of IgG, low affinity IIIb, receptor (CD16b) (FCGR3B), mRNA.  
Homo sapiens cAMP responsive element binding protein 5 (CREB5), transcript variant 4, mRNA.  
Homo sapiens interleukin 17 receptor A (IL17RA), mRNA.  
Homo sapiens protein tyrosine phosphatase, receptor type, N polypeptide 2 (PTPRN2), transcript variant 3, mRNA.  
Homo sapiens ring finger protein 130 (RNF130), mRNA.

Homo sapiens troponin I type 2 (skeletal, fast) (TNNI2), mRNA.  
Homo sapiens S100 calcium binding protein A8 (S100A8), mRNA.  
Homo sapiens folate receptor 3 (gamma) (FOLR3), mRNA.  
Homo sapiens ankyrin repeat domain 30B (ANKRD30B), mRNA.  
Homo sapiens cyclin-dependent kinase 5, regulatory subunit 1 (p35) (CDK5R1), mRNA.  
Homo sapiens toll-like receptor 1 (TLR1), mRNA.  
Homo sapiens KIAA1618 (KIAA1618), mRNA.  
Homo sapiens ribosomal protein L26 (RPL26), mRNA.  
Homo sapiens orosomucoid 2 (ORM2), mRNA.  
Homo sapiens centrosomal protein 152kDa (CEP152), mRNA.  
PREDICTED: Homo sapiens similar to NY-REN-7 antigen, transcript variant 4 (LOC653316), mRNA.  
Homo sapiens protein phosphatase 1B (formerly 2C), magnesium-dependent, beta isoform (PPM1B), transcript variant 1, mRNA.  
Homo sapiens Kruppel-like factor 6 (KLF6), transcript variant 2, mRNA.  
Homo sapiens cysteinyl leukotriene receptor 1 (CYSLTR1), mRNA.  
PREDICTED: Homo sapiens similar to similar to RPL23AP7 protein (LOC644033), mRNA.  
Homo sapiens yrdC domain containing (E. coli) (YRDC), mRNA.  
Homo sapiens cytochrome P450, family 4, subfamily F, polypeptide 3 (CYP4F3), mRNA.  
Homo sapiens phosphatase and actin regulator 1 (PHACTR1), mRNA.  
Homo sapiens protein-L-isoaspartate (D-aspartate) O-methyltransferase domain containing 1 (PCMTD1), mRNA.  
Homo sapiens hypothetical protein FLJ34047 (FLJ34047), mRNA.  
Homo sapiens ribosomal protein S29 (RPS29), transcript variant 1, mRNA.  
Homo sapiens centrosomal protein 27kDa (CEP27), mRNA.  
PREDICTED: Homo sapiens hypothetical protein LOC644964 (LOC644964), mRNA.  
Homo sapiens golgi autoantigen, golgin subfamily a, 2 (GOLGA2), mRNA.  
PREDICTED: Homo sapiens similar to 40S ribosomal protein S29 (LOC643284), mRNA.  
Homo sapiens UPF2 regulator of nonsense transcripts homolog (yeast) (UPF2), transcript variant 2, mRNA.  
Homo sapiens RNA, 7SK, nuclear (RN7SK) on chromosome 6.  
Homo sapiens ubiquitously transcribed tetratricopeptide repeat gene, Y-linked (UTY), transcript variant 3, mRNA.  
Homo sapiens protein phosphatase 1, regulatory (inhibitor) subunit 12A (PPP1R12A), mRNA.  
Homo sapiens RAB3 GTPase activating protein subunit 1 (catalytic) (RAB3GAP1), mRNA.  
Homo sapiens chromosome 14 open reading frame 102 (C14orf102), transcript variant 1, mRNA.  
Homo sapiens Fc fragment of IgA, receptor for (FCAR), transcript variant 9, mRNA.  
Homo sapiens osteoclast-associated receptor (OSCAR), transcript variant 3, mRNA.  
Homo sapiens kinesin family member 1B (KIF1B), transcript variant 2, mRNA.  
Homo sapiens PHD finger protein 3 (PHF3), mRNA.  
PREDICTED: Homo sapiens similar to Williams Beuren syndrome chromosome region 19, transcript variant 6 (LOC643882), mRNA.  
Homo sapiens Mdm4, transformed 3T3 cell double minute 4, p53 binding protein (mouse) (MDM4), mRNA.  
Homo sapiens enhancer of polycomb homolog 1 (Drosophila) (EPC1), mRNA.  
Homo sapiens RAE1 RNA export 1 homolog (S. pombe) (RAE1), transcript variant 1, mRNA.  
Homo sapiens pleckstrin homology, Sec7 and coiled-coil domains, binding protein (PSCDBP), mRNA.  
PREDICTED: Homo sapiens hypothetical protein LOC643882 (LOC643882), mRNA.  
Homo sapiens zinc finger protein 346 (ZNF346), mRNA.  
Homo sapiens jun dimerization protein 2 (JDP2), mRNA.  
Homo sapiens solute carrier family 2 (facilitated glucose transporter), member 11 (SLC2A11), transcript variant 1, mRNA.  
Homo sapiens solute carrier family 5 (sodium/glucose cotransporter), member 9 (SLC5A9), mRNA.  
PREDICTED: Homo sapiens similar to H3 histone, family 3B (LOC730740), mRNA.  
Homo sapiens S100 calcium binding protein A12 (S100A12), mRNA.  
Homo sapiens RCSD domain containing 1 (RCSD1), mRNA.

Homo sapiens colony stimulating factor 2 receptor, alpha, low-affinity (granulocyte-macrophage) (CSF2RA), tr

Homo sapiens succinate dehydrogenase complex, subunit A, flavoprotein pseudogene 1 (SDHALP1) on chromo

Homo sapiens antagonist of mitotic exit network 1 homolog (*S. cerevisiae*) (AMN1), mRNA.

Homo sapiens transmembrane 6 superfamily member 1 (TM6SF1), mRNA.

Homo sapiens chromosome 7 open reading frame 25 (C7orf25), mRNA.

PREDICTED: Homo sapiens similar to A1661453 protein (FLJ90086), mRNA.

Homo sapiens synaptojanin 2 (SYNJ2), mRNA.

Homo sapiens syntaxin 10 (STX10), mRNA.

Homo sapiens ring finger and FYVE-like domain containing 1 (RFFL), transcript variant 2, mRNA.

Homo sapiens aarF domain containing kinase 4 (ADCK4), mRNA.

Homo sapiens tripartite motif-containing 25 (TRIM25), mRNA.

Homo sapiens ankyrin repeat domain 44 (ANKRD44), mRNA.

Homo sapiens heme binding protein 2 (HEBP2), mRNA.

Homo sapiens eukaryotic translation initiation factor 2 alpha kinase 4 (EIF2AK4), mRNA.

Homo sapiens ribosomal protein L23 (RPL23), mRNA.

Homo sapiens chromosome Y open reading frame 15B (CYorf15B), mRNA.

PREDICTED: Homo sapiens similar to dicer1 (LOC647691), mRNA.

Homo sapiens tumor necrosis factor (ligand) superfamily, member 13b (TNFSF13B), mRNA.

Homo sapiens Fas (TNFRSF6)-associated via death domain (FADD), mRNA.

Homo sapiens regulator of G-protein signalling 18 (RGS18), mRNA.

Homo sapiens transporter 2, ATP-binding cassette, sub-family B (MDR/TAP) (TAP2), transcript variant 2, mRNA

Homo sapiens paraneoplastic antigen like 6A (PNMA6A), mRNA.

PREDICTED: Homo sapiens similar to Dihydrofolate reductase, transcript variant 1 (LOC643509), mRNA.

Homo sapiens serglycin (SRGN), mRNA.

Homo sapiens eomesodermin homolog (*Xenopus laevis*) (EOMES), mRNA.

Homo sapiens proteasome (prosome, macropain) subunit, alpha type, 1 (PSMA1), transcript variant 1, mRNA.

Homo sapiens endosulfine alpha (ENSA), transcript variant 8, mRNA.

Homo sapiens chromosome 10 open reading frame 119 (C10orf119), mRNA.

Homo sapiens hypoxia-inducible factor 1, alpha subunit (basic helix-loop-helix transcription factor) (HIF1A), tr

Homo sapiens RNA binding motif protein, X-linked-like 1 (RBMXL1), mRNA.

Homo sapiens ecotropic viral integration site 2B (EVI2B), mRNA.

Homo sapiens insulin receptor substrate 2 (IRS2), mRNA.

Homo sapiens alanyl (membrane) aminopeptidase (aminopeptidase N, aminopeptidase M, microsomal amino

PREDICTED: Homo sapiens membrane bound O-acyltransferase domain containing 1, transcript variant 1 (MBC

Homo sapiens histone deacetylase 4 (HDAC4), mRNA.

Homo sapiens zinc finger protein 585A (ZNF585A), transcript variant 1, mRNA.

Homo sapiens oxoeicosanoid (OXE) receptor 1 (OXER1), mRNA.

Homo sapiens mitogen-activated protein kinase kinase kinase 2 (MAP3K2), mRNA.

Homo sapiens RAP1A, member of RAS oncogene family (RAP1A), transcript variant 1, mRNA.

Homo sapiens hypothetical protein LOC552891 (LOC552891), mRNA.

Homo sapiens RNA binding motif protein 25 (RBM25), mRNA.

Homo sapiens actin related protein 2/3 complex, subunit 5, 16kDa (ARPC5), mRNA.

Homo sapiens similar to H3 histone, family 3B (LOC440093), mRNA.

Homo sapiens 5'-nucleotidase, cytosolic III (NT5C3), transcript variant 2, mRNA.

Homo sapiens ribosomal protein L32 (RPL32), transcript variant 3, mRNA.

Homo sapiens ankyrin repeat domain 55 (ANKRD55), transcript variant 1, mRNA.

PREDICTED: Homo sapiens similar to 60S ribosomal protein L14 (CAG-ISL 7), transcript variant 1 (LOC649821),

Homo sapiens bone marrow stromal cell antigen 1 (BST1), mRNA.

Homo sapiens chromobox homolog 1 (HP1 beta homolog Drosophila ) (CBX1), mRNA.  
PREDICTED: Homo sapiens similar to general transcription factor II I (LOC641978), mRNA.  
PREDICTED: Homo sapiens similar to hypothetical protein MGC40405, transcript variant 1 (LOC653158), mRNA/  
Homo sapiens FLJ38717 protein (FLJ38717), mRNA.  
Homo sapiens C-type lectin domain family 4, member E (CLEC4E), mRNA.  
Homo sapiens chromosome 20 open reading frame 43 (C20orf43), mRNA.  
Homo sapiens protein kinase, Y-linked (PRKY), mRNA.  
Homo sapiens toll-like receptor 2 (TLR2), mRNA.  
Homo sapiens mitochondrial carrier triple repeat 1 (MCART1), mRNA.  
Homo sapiens nuclear factor of kappa light polypeptide gene enhancer in B-cells inhibitor, alpha (NFKBIA), mR  
Homo sapiens leucine rich repeat neuronal 3 (LRRN3), mRNA.  
Homo sapiens solute carrier family 26, member 8 (SLC26A8), transcript variant 1, mRNA.  
Homo sapiens HECT, C2 and WW domain containing E3 ubiquitin protein ligase 2 (HECW2), mRNA.  
Homo sapiens thymosin, beta 4, Y-linked (TMSB4Y), mRNA.  
PREDICTED: Homo sapiens similar to RAN-binding protein 2-like 1 isoform 2, transcript variant 11 (LOC653596;  
Homo sapiens metallophosphoesterase 1 (MPPE1), mRNA.  
Homo sapiens leucine-rich repeat kinase 2 (LRRK2), mRNA.  
Homo sapiens transporter 2, ATP-binding cassette, sub-family B (MDR/TAP) (TAP2), transcript variant 1, mRNA/  
PREDICTED: Homo sapiens hypothetical protein FLJ40722, transcript variant 3 (FLJ40722), mRNA.  
Homo sapiens interleukin 18 (interferon-gamma-inducing factor) (IL18), mRNA.  
Homo sapiens phosphatidylinositol binding clathrin assembly protein (PICALM), transcript variant 1, mRNA.  
Homo sapiens chromodomain helicase DNA binding protein 7 (CHD7), mRNA.  
Homo sapiens cadherin 2, type 1, N-cadherin (neuronal) (CDH2), mRNA.  
PREDICTED: Homo sapiens similar to pleckstrin homology domain containing, family M (with RUN domain) me  
PREDICTED: Homo sapiens hypothetical protein MGC12760, transcript variant 2 (MGC12760), mRNA.  
Homo sapiens protein phosphatase 1, regulatory (inhibitor) subunit 3D (PPP1R3D), mRNA.  
Homo sapiens oxysterol binding protein-like 8 (OSBPL8), transcript variant 2, mRNA.  
PREDICTED: Homo sapiens solute carrier family 25 (carnitine/acylcarnitine translocase), member 20 (SLC25A20  
Homo sapiens interleukin 8 receptor, beta (IL8RB), mRNA.  
Homo sapiens ankyrin repeat and SOCS box-containing 8 (ASB8), mRNA.  
Homo sapiens butyrophilin-like 3 (BTNL3), transcript variant 2, mRNA.  
Homo sapiens paraneoplastic antigen MA3 (PNMA3), mRNA.  
Homo sapiens tubulin, alpha 4a (TUBA4A), mRNA.  
Homo sapiens deltex 3-like (Drosophila) (DTX3L), mRNA.  
PREDICTED: Homo sapiens hypothetical protein LOC647389 (LOC647389), mRNA.  
Homo sapiens oxysterol binding protein-like 9 (OSBPL9), transcript variant 6, mRNA.  
Homo sapiens G protein-coupled receptor 84 (GPR84), mRNA.  
Homo sapiens SUMO1 pseudogene 1 (SUMO1P1) on chromosome 20.  
Homo sapiens leiomodulin 3 (fetal) (LMOD3), mRNA.  
Homo sapiens transglutaminase 3 (E polypeptide, protein-glutamine-gamma-glutamyltransferase) (TGM3), mF  
Homo sapiens nephroblastoma overexpressed gene (NOV), mRNA.  
Homo sapiens amyotrophic lateral sclerosis 2 (juvenile) chromosome region, candidate 14 (ALS2CR14), mRNA.  
Homo sapiens adducin 3 (gamma) (ADD3), transcript variant 1, mRNA.  
Homo sapiens centrosomal protein 63kDa (CEP63), transcript variant 1, mRNA.  
Homo sapiens chemokine (C-X-C motif) ligand 1 (melanoma growth stimulating activity, alpha) (CXCL1), mRNA  
Homo sapiens lines homolog 1 (Drosophila) (LINS1), transcript variant 6, mRNA.  
Homo sapiens similar to zinc finger protein 469 (LOC441193), mRNA.  
Homo sapiens PC4 and SFRS1 interacting protein 1 (PSIP1), transcript variant 2, mRNA.

Homo sapiens chromobox homolog 3 (HP1 gamma homolog, Drosophila) (CBX3), transcript variant 2, mRNA.  
Homo sapiens cysteine-rich secretory protein LCCL domain containing 2 (CRISPLD2), mRNA.  
PREDICTED: Homo sapiens similar to Proline-rich nuclear receptor coactivator 2, transcript variant 3 (LOC6531  
Homo sapiens cytoskeleton-associated protein 4 (CKAP4), mRNA.  
Homo sapiens dJ341D10.1 (novel protein) (dJ341D10.1), mRNA.  
Homo sapiens F-box and leucine-rich repeat protein 13 (FBXL13), mRNA.  
Homo sapiens BTAF1 RNA polymerase II, B-TFIID transcription factor-associated, 170kDa (Mot1 homolog, S. ce  
Homo sapiens MAX-like protein X (MLX), transcript variant 3, mRNA.  
Homo sapiens neuroplastin (NPTN), transcript variant beta, mRNA.  
PREDICTED: Homo sapiens similar to H3 histone, family 2 isoform 2 (LOC653604), mRNA.  
Homo sapiens cytochrome c oxidase subunit VIIb (COX7B), nuclear gene encoding mitochondrial protein, mRNA  
Homo sapiens POU domain, class 2, transcription factor 1 (POU2F1), mRNA.  
PREDICTED: Homo sapiens similar to Fc receptor-like 5 (LOC729853), mRNA.  
Homo sapiens BMX non-receptor tyrosine kinase (BMX), mRNA.  
Homo sapiens matrix metalloproteinase 9 (gelatinase B, 92kDa gelatinase, 92kDa type IV collagenase) (MMP9)  
Homo sapiens acyltransferase like 1 (AYTL1), mRNA.  
Homo sapiens neutrophil cytosolic factor 2 (65kDa, chronic granulomatous disease, autosomal 2) (NCF2), mRN  
Homo sapiens testis-specific transcript, Y-linked 15 (TTY15) on chromosome Y.  
Homo sapiens mitogen-activated protein kinase kinase kinase 4 (MAP4K4), transcript variant 2, mRNA.  
Homo sapiens arachidonate 5-lipoxygenase-activating protein (ALOX5AP), mRNA.  
Homo sapiens proteasome (prosome, macropain) subunit, beta type, 9 (large multifunctional peptidase 2) (PS  
Homo sapiens MCM8 minichromosome maintenance deficient 8 (S. cerevisiae) (MCM8), transcript variant 2, r  
Homo sapiens SFRS protein kinase 1 (SRPK1), mRNA.  
Homo sapiens CKLF-like MARVEL transmembrane domain containing 2 (CMTM2), mRNA.  
Homo sapiens MOCO sulphurase C-terminal domain containing 1 (MOSC1), mRNA.  
Homo sapiens IBR domain containing 2 (IBRDC2), mRNA.  
Homo sapiens ankyrin repeat domain 22 (ANKRD22), mRNA.  
Homo sapiens CUG triplet repeat, RNA binding protein 2 (CUGBP2), transcript variant 3, mRNA.  
PREDICTED: Homo sapiens hypothetical protein LOC648226 (LOC648226), mRNA.  
Homo sapiens S100 calcium binding protein P (S100P), mRNA.  
Homo sapiens pregnancy specific beta-1-glycoprotein 9 (PSG9), mRNA.  
Homo sapiens bromodomain and WD repeat domain containing 1 (BRWD1), transcript variant 2, mRNA.  
Homo sapiens ankyrin repeat and BTB (POZ) domain containing 1 (ABTB1), transcript variant 2, mRNA.  
Homo sapiens solute carrier family 36 (proton/amino acid symporter), member 4 (SLC36A4), mRNA.  
Homo sapiens zinc finger protein 281 (ZNF281), mRNA.  
Homo sapiens chromosome 1 open reading frame 108 (C1orf108), mRNA.  
Homo sapiens acidic (leucine-rich) nuclear phosphoprotein 32 family, member A (ANP32A), mRNA.  
PREDICTED: Homo sapiens hypothetical gene supported by AF147354 (LOC388789), mRNA.  
Homo sapiens 4-aminobutyrate aminotransferase (ABAT), nuclear gene encoding mitochondrial protein, trans  
PREDICTED: Homo sapiens zinc finger protein 486 (ZNF486), mRNA.  
Homo sapiens chromodomain helicase DNA binding protein 8 (CHD8), mRNA.  
PREDICTED: Homo sapiens KIAA0492 protein (KIAA0492), mRNA.  
Homo sapiens hypothetical protein MGC4093 (MGC4093), mRNA.  
Homo sapiens annexin A11 (ANXA11), transcript variant c, mRNA.  
Homo sapiens peptidyl arginine deiminase, type IV (PADI4), mRNA.  
Homo sapiens KIAA0319-like (KIAA0319L), transcript variant 2, mRNA.  
Homo sapiens tudor domain containing 1 (TDRD1), mRNA.  
Homo sapiens AT rich interactive domain 4A (RBP1-like) (ARID4A), transcript variant 3, mRNA.

Homo sapiens solute carrier family 5 (iodide transporter), member 8 (SLC5A8), mRNA.  
Homo sapiens hypothetical protein FLJ20152 (FLJ20152), transcript variant 2, mRNA.  
PREDICTED: Homo sapiens hypothetical protein FLJ14107 (FLJ14107), misc RNA.  
Homo sapiens KIAA1706 protein (KIAA1706), mRNA.  
Homo sapiens phosphatidylinositol-4-phosphate 5-kinase, type II, beta (PIP5K2B), transcript variant 2, mRNA.  
Homo sapiens RAB35, member RAS oncogene family (RAB35), mRNA.  
Homo sapiens aryl hydrocarbon receptor (AHR), mRNA.  
Homo sapiens zinc finger, SWIM-type containing 1 (ZSWIM1), mRNA.  
Homo sapiens ankyrin repeat and death domain containing 1A (ANKDD1A), mRNA.  
Homo sapiens SP110 nuclear body protein (SP110), transcript variant c, mRNA.  
Homo sapiens coronin, actin binding protein, 2A (CORO2A), transcript variant 1, mRNA.  
PREDICTED: Homo sapiens similar to RAN-binding protein 2-like 1 isoform 2, transcript variant 10 (LOC653086), mRNA.  
Homo sapiens interleukin 9 receptor (IL9R), transcript variant 1, mRNA.  
Homo sapiens chromosome 21 open reading frame 55 (C21orf55), mRNA.  
Homo sapiens pleiomorphic adenoma gene-like 1 (PLAGL1), transcript variant 3, mRNA.  
Homo sapiens zinc finger protein 223 (ZNF223), mRNA.  
Homo sapiens general transcription factor II, i, pseudogene 1 (GTF2IP1) on chromosome 7.  
CR738550 Soares fetal liver spleen 1NFLS Homo sapiens cDNA clone IMAGp971E092 ; IMAGE:113723 5, mRNA  
Homo sapiens cDNA FLJ40660 fis, clone THYMU2019686  
Homo sapiens cDNA FLJ30935 fis, clone FEBRA2007176  
tt27g09.x1 NCI\_CGAP\_GC6 Homo sapiens cDNA clone IMAGE:2242048 3, mRNA sequence  
zv04h05.r1 Soares\_NhHMPu\_S1 Homo sapiens cDNA clone IMAGE:752697 5, mRNA sequence  
BX108917 Soares fetal liver spleen 1NFLS Homo sapiens cDNA clone IMAGp998F09386, mRNA sequence  
CM4-MT0361-060201-735-a04 MT0361 Homo sapiens cDNA, mRNA sequence  
AGENCOURT\_8585572 NIH\_MGC\_113 Homo sapiens cDNA clone IMAGE:6302814 5, mRNA sequence  
DA385619 BRTHA2 Homo sapiens cDNA clone BRTHA2020660 5, mRNA sequence  
DA572426 HEMBB1 Homo sapiens cDNA clone HEMBB1001157 5, mRNA sequence  
il42e04.y1 HR85 islet Homo sapiens cDNA clone IMAGE:6032719 5, mRNA sequence  
Homo sapiens mRNA; cDNA DKFZp667A182 (from clone DKFZp667A182)  
Homo sapiens cDNA clone IMAGE:6277782, partial cds  
AGENCOURT\_8844418 NIH\_MGC\_141 Homo sapiens cDNA clone IMAGE:6385379 5, mRNA sequence  
BX113731 Soares\_NFL\_T\_GBC\_S1 Homo sapiens cDNA clone IMAGp998E153815, mRNA sequence  
UI-E-EJ0-aiq-m-17-0-UI.r1 UI-E-EJ0 Homo sapiens cDNA clone UI-E-EJ0-aiq-m-17-0-UI 5, mRNA sequence  
CR746297 NCI\_CGAP\_Kid11 Homo sapiens cDNA clone IMAGp971P2385 ; IMAGE:2029602 5, mRNA sequence  
AV645572 GLC Homo sapiens cDNA clone GLCABG03 3, mRNA sequence  
df10f04.y1 Morton Fetal Cochlea Homo sapiens cDNA clone IMAGE:2483071 5, mRNA sequence  
Homo sapiens cDNA FLJ42781 fis, clone BRAWH3005534  
AGENCOURT\_7761579 NIH\_MGC\_70 Homo sapiens cDNA clone IMAGE:6020085 5, mRNA sequence  
UI-E-CL1-afc-h-16-0-UI.r1 UI-E-CL1 Homo sapiens cDNA clone UI-E-CL1-afc-h-16-0-UI 5, mRNA sequence  
BX111927 Soares\_multiple\_sclerosis\_2NbHMSP Homo sapiens cDNA clone IMAGp998G05619, mRNA sequence  
AGENCOURT\_8353231 NIH\_MGC\_113 Homo sapiens cDNA clone IMAGE:6278225 5, mRNA sequence  
zp47f07.s1 Stratagene HeLa cell s3 937216 Homo sapiens cDNA clone IMAGE:612613 3, mRNA sequence  
UI-H-DIO-auw-h-24-0-UI.s1 NCI\_CGAP\_DIO Homo sapiens cDNA clone IMAGE:5875271 3, mRNA sequence  
AGENCOURT\_13462296 NIH\_MGC\_187 Homo sapiens cDNA clone IMAGE:30318122 5, mRNA sequence  
AGENCOURT\_8803344 Lupski\_sciatic\_nerve Homo sapiens cDNA clone IMAGE:6198982 5, mRNA sequence  
Homo sapiens cDNA clone IMAGE:5270591  
UI-1-BB1p-axy-f-04-0-UI.s2 NCI\_CGAP\_PI6 Homo sapiens cDNA clone UI-1-BB1p-axy-f-04-0-UI 3, mRNA sequence  
UI-E-EJ0-ahi-k-07-0-UI.r2 UI-E-EJ0 Homo sapiens cDNA clone UI-E-EJ0-ahi-k-07-0-UI 5, mRNA sequence

BX099079 Soares fetal liver spleen 1NFLS Homo sapiens cDNA clone IMAGp998O14606, mRNA sequence  
xv24e03.x1 Soares\_NFL\_T\_GBC\_S1 Homo sapiens cDNA clone IMAGE:2814076 3, mRNA sequence  
AGENCOURT\_10480778 NIH\_MGC\_107 Homo sapiens cDNA clone IMAGE:6646806 5, mRNA sequence  
wi12b07.x1 NCI\_CGAP\_Co16 Homo sapiens cDNA clone IMAGE:2390005 3, mRNA sequence  
Homo sapiens cDNA clone IMAGE:5272804  
BX109404 NCI\_CGAP\_Br2 Homo sapiens cDNA clone IMAGp998G234083, mRNA sequence  
PM0-NN1173-231000-001-h11 NN1173 Homo sapiens cDNA, mRNA sequence  
BX100504 Soares\_fetal\_heart\_NbHH19W Homo sapiens cDNA clone IMAGp998D19788, mRNA sequence  
DA395916 BRTHA2 Homo sapiens cDNA clone BRTHA2035482 5, mRNA sequence  
Homo sapiens partial mRNA; ID YG39-1C  
ny62g05.s1 NCI\_CGAP\_GCB1 Homo sapiens cDNA clone IMAGE:1282904 3, mRNA sequence  
Homo sapiens cDNA FLJ26044 fis, clone PRS01852  
Homo sapiens mRNA; cDNA DKFZp313O229 (from clone DKFZp313O229)  
cs75c04.y1 Human Retinal pigment epithelium/choroid cDNA (Un-normalized, unamplified): cs Homo sapiens  
UI-E-CK1-afn-i-01-0-UI.s2 UI-E-CK1 Homo sapiens cDNA clone UI-E-CK1-afn-i-01-0-UI 3, mRNA sequence  
BX092006 NCI\_CGAP\_Kid11 Homo sapiens cDNA clone IMAGp998M175911 ; IMAGE:2380600, mRNA sequence  
df27f11.w1 Morton Fetal Cochlea Homo sapiens cDNA clone IMAGE:2484644 3, mRNA sequence  
FNPATC04 FNP Homo sapiens cDNA, mRNA sequence  
AV651069 GLC Homo sapiens cDNA clone GLCCLD10 3, mRNA sequence  
wd35b02.x1 Soares\_NFL\_T\_GBC\_S1 Homo sapiens cDNA clone IMAGE:2330091 3, mRNA sequence  
603183417F1 NIH\_MGC\_121 Homo sapiens cDNA clone IMAGE:5247269 5, mRNA sequence  
BX117171 NCI\_CGAP\_Co3 Homo sapiens cDNA clone IMAGp998J142299, mRNA sequence  
nw90g12.s1 NCI\_CGAP\_Pr12 Homo sapiens cDNA clone IMAGE:1253926, mRNA sequence  
yy19a06.s1 Soares melanocyte 2NbHM Homo sapiens cDNA clone IMAGE:271666 3 similar to PIR:S22049 S220  
wq37a10.x1 NCI\_CGAP\_GC6 Homo sapiens cDNA clone IMAGE:2473434 3 similar to contains element MER18  
hv70f04.x1 NCI\_CGAP\_Lu24 Homo sapiens cDNA clone IMAGE:3178783 3, mRNA sequence  
Homo sapiens cDNA FLJ30923 fis, clone FEBRA2006491  
Homo sapiens mRNA; cDNA DKFZp586O1318 (from clone DKFZp586O1318)  
CM2-HT0242-251099-024-a09 HT0242 Homo sapiens cDNA, mRNA sequence  
Homo sapiens mRNA; cDNA DKFZp762F0616 (from clone DKFZp762F0616)  
zn90c01.r1 Stratagene lung carcinoma 937218 Homo sapiens cDNA clone IMAGE:565440 5, mRNA sequence  
Homo sapiens cDNA FLJ37202 fis, clone BRALZ2006734  
Homo sapiens cDNA FLJ42306 fis, clone TRACH2001646  
Homo sapiens cDNA: FLJ21679 fis, clone COL09221  
SM011178 Brain 3 EST Homo sapiens cDNA clone ID\_11178 3', mRNA sequence  
Homo sapiens mRNA; cDNA DKFZp686J19209 (from clone DKFZp686J19209)  
603089645F1 NIH\_MGC\_120 Homo sapiens cDNA clone IMAGE:5228627 5, mRNA sequence  
zr87e09.r1 NCI\_CGAP\_GCB1 Homo sapiens cDNA clone IMAGE:682696 5, mRNA sequence  
AGENCOURT\_14538855 NIH\_MGC\_191 Homo sapiens cDNA clone IMAGE:30418792 5, mRNA sequence  
AV705309 ADB Homo sapiens cDNA clone ADBBWE05 5, mRNA sequence  
601590965F1 NIH\_MGC\_7 Homo sapiens cDNA clone IMAGE:3944752 5, mRNA sequence  
BX111162 Soares\_testis\_NHT Homo sapiens cDNA clone IMAGp998E074158, mRNA sequence  
Homo sapiens thioredoxin (TXN), mRNA.

## Ontology\_Component

synthetic LOC441257, transcript variant 2 (LOC643862), mRNA.

intracellular [goid 5622] [evidence IEA]; cytosolic small ribosomal subunit (sensu Eukaryota) [goid 5843] [pmid

ribosome [goid 5840] [evidence IEA]; intracellular [goid 5622] [evidence IEA]; cytosolic small ribosomal subunit  
integral to membrane [goid 16021] [evidence IEA]; membrane fraction [goid 5624] [pmid 15297306] [evidence IEA];  
heterotrimeric G-protein complex [goid 5834] [evidence IEA]; integral to membrane [goid 16021] [evidence IEA]

membrane [goid 16020] [evidence IEA]; extracellular region [goid 5576] [evidence IEA]

nucleus [goid 5634] [evidence IEA]

integral to membrane [goid 16021] [evidence IEA]

extracellular space [goid 5615] [evidence NR ]

protein phosphatase type 2A complex [goid 159] [pmid 1849734] [evidence ISS]

plasma membrane [goid 5886] [pmid 7754374] [evidence TAS]; integral to plasma membrane [goid 5887] [pmid 7754374]  
DNA-directed RNA polymerase II, core complex [goid 5665] [pmid 8797801] [evidence TAS]; nucleus [goid 5634]

membrane [goid 16020] [evidence IEA]; integral to membrane [goid 16021] [evidence IEA]

nucleus [goid 5634] [pmid 9687510] [evidence IEP]

membrane [goid 16020] [evidence IEA]; integral to membrane [goid 16021] [evidence IEA]



chromosome [goid 5694] [evidence IEA]; nucleus [goid 5634] [evidence IEA]; nucleosome [goid 786] [evidence

NA.

ribosome [goid 5840] [evidence IEA]; intracellular [goid 5622] [evidence IEA]; cytosolic small ribosomal subunit

LOC653352), mRNA.

integral to plasma membrane [goid 5887] [pmid 2555171] [evidence TAS]; membrane [goid 16020] [evidence IEA]

nucleus [goid 5634] [evidence IEA]

membrane [goid 16020] [evidence IEA]; integral to membrane [goid 16021] [evidence IEA]

intracellular [goid 5622] [evidence IEA]

cytoplasm [goid 5737] [evidence IEA]

voltage-gated calcium channel complex [goid 5891] [pmid 8071363] [evidence TAS]; integral to membrane [goid 16021] [evidence IEA]

mitochondrion [goid 5739] [pmid 3278312] [evidence TAS]; cytoplasm [goid 5737] [evidence IEA]

cytosol [goid 5829] [pmid 9538874] [evidence TAS]; soluble fraction [goid 5625] [pmid 9538874] [evidence TAS]

membrane [goid 16020] [evidence IEA]; integral to membrane [goid 16021] [evidence IEA]

intracellular [goid 5622] [pmid 11256614] [evidence IDA]

intracellular [goid 5622] [evidence IEA]

nucleus [goid 5634] [pmid 11137288] [evidence NAS]

endoplasmic reticulum [goid 5783] [evidence IEA]; extracellular space [goid 5615] [pmid 12368295] [evidence IEA]

membrane [goid 16020] [evidence IEA]; extracellular matrix (sensu Metazoa) [goid 5578] [evidence IEA]; anchorage

cell fraction [goid 267] [evidence NAS]

nucleus [goid 5634] [evidence IEA]

nucleus [goid 5634] [evidence NAS]; intracellular [goid 5622] [evidence IEA]

nucleus [goid 5634] [pmid 9874765] [evidence IDA]; histone deacetylase complex [goid 118] [pmid 9874765] [evidence IDA]

nucleus [goid 5634] [pmid 11279057] [evidence ISS]; Golgi apparatus [goid 5794] [pmid 11279057] [evidence IEA]

nucleus [goid 5634] [pmid 7693701] [evidence TAS]

nucleus [goid 5634] [evidence IEA]; lamin filament [goid 5638] [pmid 7557986] [evidence TAS]

plasma membrane [goid 5886] [pmid 8615752] [evidence TAS]; Golgi apparatus [goid 5794] [pmid 8615752] [evidence IEA];  
:NA.

integral to plasma membrane [goid 5887] [pmid 9062191] [evidence TAS]; membrane [goid 16020] [evidence  
integral to plasma membrane [goid 5887] [pmid 2971451] [evidence TAS]; membrane [goid 16020] [evidence

contractile ring [goid 5826] [pmid 9203580] [evidence ISS]; nucleus [goid 5634] [pmid 10942595] [evidence ID  
membrane [goid 16020] [evidence IEA]; integral to membrane [goid 16021] [evidence IEA]

nucleus [goid 5634] [evidence ISS]; membrane [goid 16020] [evidence IEA]; cytoplasm [goid 5737] [pmid 1451  
membrane [goid 16020] [evidence IEA]; endoplasmic reticulum [goid 5783] [evidence IEA]  
plasma membrane [goid 5886] [pmid 1660144] [evidence TAS]; integral to plasma membrane [goid 5887] [pm

nucleus [goid 5634] [evidence IEA]; transcription factor TFIID complex [goid 5669] [evidence NR ]; intracellular

intracellular [goid 5622] [evidence IEA]

membrane [goid 16020] [evidence IEA]

extracellular region [goid 5576] [pmid 11481438] [evidence NAS]; extracellular space [goid 5615] [evidence IEA]

plasma membrane [goid 5886] [pmid 10799517] [evidence TAS]; cAMP-dependent protein kinase complex [gc  
cytosol [goid 5829] [evidence NR ]

RNA.

nucleus [goid 5634] [evidence IEA]

integral to membrane [goid 16021] [evidence IEA]

nucleus [goid 5634] [evidence IEA]

lysosome [goid 5764] [evidence IEA]

membrane [goid 16020] [evidence IEA]; peroxisome [goid 5777] [evidence IEA]; integral to membrane [goid 16021]  
extracellular space [goid 5615] [evidence NR ]

membrane [goid 16020] [evidence IEA]; integral to membrane [goid 16021] [evidence IEA]

extracellular region [goid 5576] [pmid 14718574] [evidence NAS]

membrane [goid 16020] [evidence IEA]; integral to membrane [goid 16021] [evidence IEA]

nucleus [goid 5634] [evidence IEA]

endoplasmic reticulum [goid 5783] [evidence IEA]; extracellular space [goid 5615] [pmid 12368295] [evidence

membrane [goid 16020] [evidence IEA]; mitochondrion [goid 5739] [pmid 15685448] [evidence IDA]; integral to

RNA.

extracellular region [goid 5576] [evidence IEA]

chromosome [goid 5694] [evidence IEA]; nucleus [goid 5634] [evidence IEA]; nucleosome [goid 786] [pmid 9111451]  
membrane [goid 16020] [evidence IEA]; integral to membrane [goid 16021] [evidence IEA]

nucleus [goid 5634] [evidence IEA]

nucleus [goid 5634] [pmid 10820245] [evidence TAS]; cytoplasm [goid 5737] [pmid 10820245] [evidence TAS]

plasma membrane [goid 5886] [pmid 10749881] [evidence TAS]; integral to membrane [goid 16021] [pmid 16

integral to plasma membrane [goid 5887] [pmid 2307934] [evidence TAS]; membrane [goid 16020] [evidence  
nucleus [goid 5634] [evidence IEA]; intracellular [goid 5622] [evidence IEA]

alpha-ketoglutarate dehydrogenase complex (sensu Eukaryota) [goid 5947] [pmid 11839747] [evidence TAS];  
integral to membrane [goid 16021] [evidence IEA]; membrane [goid 16020] [evidence IEA]; extracellular space  
membrane [goid 16020] [evidence IEA]; integral to membrane [goid 16021] [evidence IEA]

nucleus [goid 5634] [pmid 7798274] [evidence TAS]

Golgi membrane [goid 139] [pmid 12682071] [evidence IDA]; membrane [goid 16020] [evidence IEA]; secretory  
clathrin coat of coated pit [goid 30132] [evidence IEA]; clathrin vesicle coat [goid 30125] [evidence IEA]

ribosome [goid 5840] [evidence IEA]; intracellular [goid 5622] [evidence IEA]; cytosolic small ribosomal subunit

nucleus [goid 5634] [pmid 9472028] [evidence IDA]; cytoplasm [goid 5737] [pmid 9472028] [evidence IDA]

nucleus [goid 5634] [evidence IEA]

plasma membrane [goid 5886] [pmid 1660144] [evidence TAS]; integral to plasma membrane [goid 5887] [pmid 1660144] [evidence TAS]

nucleus [goid 5634] [pmid 1303260] [evidence NAS]

cytoplasm [goid 5737] [pmid 10049785] [evidence TAS]; soluble fraction [goid 5625] [pmid 10049785] [evidence TAS];  
1), mRNA.

cytoplasm [goid 5737] [pmid 3753936] [evidence NAS]

.OC442609), mRNA.

integral to membrane [goid 16021] [pmid 11567029] [evidence TAS]

nucleus [goid 5634] [evidence IEA]; histone deacetylase complex [goid 118] [pmid 9651585] [evidence TAS]

nucleus [goid 5634] [evidence IEA]

actin cytoskeleton [goid 15629] [evidence NAS]

nucleus [goid 5634] [pmid 8425218] [evidence TAS]

membrane [goid 16020] [evidence IEA]; integral to membrane [goid 16021] [evidence IEA]; endoplasmic reticulum

nucleus [goid 5634] [evidence IEA]

nucleus [goid 5634] [evidence IEA]; calcium- and calmodulin-dependent protein kinase complex [goid 5954] [pmid 11110791] [evidence IDA]

intracellular [goid 5622] [evidence IEA]

cytoskeleton [goid 5856] [evidence IEA]; cytoplasm [goid 5737] [evidence IEA]

membrane [goid 16020] [evidence IEA]

cytoplasmic exosome (RNase complex) [goid 177] [pmid 11110791] [evidence IDA]; nuclear exosome (RNase complex)



extracellular space [goid 5615] [evidence NR ]  
membrane fraction [goid 5624] [pmid 8110752] [evidence TAS]; extrinsic to membrane [goid 19898] [pmid 81  
cellular component unknown [goid 8372] [evidence ND ]  
cyclin-dependent protein kinase 5 activator complex [goid 16533] [evidence IEA]; membrane fraction [goid 56  
plasma membrane [goid 5886] [pmid 9435236] [evidence TAS]; phagocytic vesicle [goid 45335] [pmid 110957

large ribosomal subunit [goid 15934] [evidence IEA]; intracellular [goid 5622] [evidence IEA]  
extracellular space [goid 5615] [pmid 2970990] [evidence TAS]

protein serine/threonine phosphatase complex [goid 8287] [evidence IEA]  
nucleus [goid 5634] [pmid 9689109] [evidence TAS]; intracellular [goid 5622] [evidence IEA]  
membrane fraction [goid 5624] [pmid 10391245] [evidence TAS]; integral to plasma membrane [goid 5887] [p

endoplasmic reticulum [goid 5783] [evidence IEA]; microsome [goid 5792] [evidence IEA]; membrane [goid 16

A.

ribosome [goid 5840] [evidence IEA]; intracellular [goid 5622] [evidence IEA]; cytosolic small ribosomal subuni  
centrosome [goid 5813] [pmid 14654843] [evidence IDA]

Golgi apparatus [goid 5794] [pmid 15229288] [evidence IDA]

cytoplasm [goid 5737] [pmid 14636577] [evidence IDA]; nucleus [goid 5634] [pmid 14636577] [evidence IDA]

nucleus [goid 5634] [evidence IEA]  
actin cytoskeleton [goid 15629] [evidence NR ]  
soluble fraction [goid 5625] [pmid 9852129] [evidence IDA]

plasma membrane [goid 5886] [pmid 2258698] [evidence TAS]; integral to plasma membrane [goid 5887] [pm

microtubule [goid 5874] [evidence IEA]; microtubule associated complex [goid 5875] [evidence ISS]; cytoplasm

.OC653829), mRNA.

nucleus [goid 5634] [pmid 9226370] [evidence NAS]; intracellular [goid 5622] [evidence IEA]  
nucleus [goid 5634] [pmid 10976108] [evidence IDA]  
cytoskeleton [goid 5856] [pmid 9256445] [evidence TAS]; nucleus [goid 5634] [pmid 9370289] [evidence TAS];  
membrane [goid 16020] [evidence IEA]; cytoplasm [goid 5737] [pmid 12606567] [evidence IDA]; cell cortex [g

nucleus [goid 5634] [pmid 10488071] [evidence TAS]; nucleolus [goid 5730] [pmid 10488071] [evidence TAS];  
nucleus [goid 5634] [evidence IEA]  
membrane [goid 16020] [evidence IEA]; integral to membrane [goid 16021] [evidence IEA]  
membrane [goid 16020] [evidence IEA]; integral to membrane [goid 16021] [evidence IEA]

insoluble fraction [goid 5626] [pmid 7626002] [evidence TAS]; cytosol [goid 5829] [pmid 7626002] [evidence T

integral to plasma membrane [goid 5887] [pmid 2555171] [evidence TAS]; membrane [goid 16020] [evidence IEA]; cytoplasm [goid 5737] [evidence NR]; polysome 3.

membrane [goid 16020] [evidence NAS]; integral to membrane [goid 16021] [evidence IEA]

membrane [goid 16020] [evidence IEA]; integral to membrane [goid 16021] [evidence IEA]; Golgi membrane [goid 16020] [evidence IEA]; membrane [goid 16020] [evidence IEA]

cytosolic ribosome (sensu Eukaryota) [goid 5830] [evidence ISS]; intracellular [goid 5622] [evidence NAS]; cytoplasm [goid 5737] [evidence NR]; ribosome [goid 5840] [pmid 1874450] [evidence NAS]; intracellular [goid 5622] [evidence IEA]

integral to plasma membrane [goid 5887] [evidence NR]; membrane [goid 16020] [evidence IEA]; extracellular space [goid 5737] [evidence NR]; cytoplasm [goid 5737] [evidence NR]

TAP complex [goid 42825] [pmid 12202157] [evidence NAS]; membrane [goid 16020] [evidence IEA]; endoplasmic reticulum [goid 5737] [evidence NR]

nucleus [goid 5634] [evidence IEA]

nucleus [goid 5634] [pmid 7681138] [evidence TAS]; cytosol [goid 5829] [evidence IEA]; polysome [goid 5844]

nucleus [goid 5634] [pmid 15261140] [evidence IDA]

integral to plasma membrane [goid 5887] [pmid 1903357] [evidence TAS]; membrane [goid 16020] [evidence IEA]; cytoplasm [goid 5737] [evidence NR]; polysome 3.

ER-Golgi intermediate compartment [goid 5793] [pmid 15308636] [evidence IDA]; integral to plasma membrane [goid 16021] [evidence IEA]; mRNA.

nucleus [goid 5634] [evidence NAS]; histone deacetylase complex [goid 118] [pmid 12711221] [evidence TAS];

nucleus [goid 5634] [evidence IEA]; intracellular [goid 5622] [evidence IEA]

integral to membrane [goid 16021] [evidence IEA]; membrane [goid 16020] [evidence IEA]

nucleus [goid 5634] [evidence IEA]

membrane [goid 16020] [evidence IEA]; intracellular [goid 5622] [evidence IEA]

Arp2/3 protein complex [goid 5885] [pmid 9230079] [evidence TAS]; cytoskeleton [goid 5856] [evidence IEA]; chromosome [goid 5694] [evidence IEA]; nucleus [goid 5634] [evidence IEA]; nucleosome [goid 786] [evidence IEA]; endoplasmic reticulum [goid 5783] [pmid 8557639] [evidence IDA]; cytoplasm [goid 5737] [pmid 8557639] [evidence NR]; ribosome [goid 5840] [evidence IEA]; intracellular [goid 5622] [evidence IEA]

mRNA.

membrane [goid 16020] [evidence IEA]; extrinsic to membrane [goid 19898] [pmid 8202488] [evidence TAS]

chromatin [goid 785] [evidence IEA]; nuclear heterochromatin [goid 5720] [pmid 9169582] [evidence TAS]; nu

A.

membrane [goid 16020] [evidence IEA]; integral to membrane [goid 16021] [evidence IEA]

plasma membrane [goid 5886] [pmid 9435236] [evidence TAS]; integral to plasma membrane [goid 5887] [pmid 10438939] [evidence TAS]; integral to membrane [goid 16021] [evidence IEA]; mitochondrion [goid 5739] [evidence IEA]

nucleus [goid 5634] [pmid 7679069] [evidence IDA]; cytoplasm [goid 5737] [pmid 3140380] [evidence IDA]

membrane [goid 16020] [evidence IEA]; integral to membrane [goid 16021] [evidence IEA]

integral to membrane [goid 16021] [evidence IEA]

intracellular [goid 5622] [evidence IEA]

cytoskeleton [goid 5856] [evidence IEA]; cytoplasm [goid 5737] [evidence IEA]

), mRNA.

TAP complex [goid 42825] [pmid 12202157] [evidence NAS]; membrane [goid 16020] [evidence IEA]; endoplasmic

extracellular region [goid 5576] [pmid 11598150] [evidence TAS]; extracellular space [goid 5615] [pmid 10881932] [evidence TAS]; coated pit [goid 5905] [pmid 10436022] [evidence IDA]

nucleus [goid 5634] [evidence IEA]; chromatin [goid 785] [evidence IEA]

membrane [goid 16020] [evidence IEA]; integral to membrane [goid 16021] [evidence IEA]

membrane 1; adapter protein 162, transcript variant 4 (LOC440456), mRNA.

)), mRNA.

integral to plasma membrane [goid 5887] [pmid 10438939] [evidence TAS]; membrane [goid 16020] [pmid 10438939] [evidence TAS]

membrane [goid 16020] [evidence IEA]; integral to membrane [goid 16021] [evidence IEA]

microtubule [goid 5874] [evidence IEA]; protein complex [goid 43234] [evidence IEA]

membrane [goid 16020] [evidence IEA]; integral to membrane [goid 16021] [evidence NAS]

actin cytoskeleton [goid 15629] [pmid 11256614] [evidence IDA]; cytoskeleton [goid 5856] [evidence IEA]

cornified envelope [goid 1533] [evidence ISS]; extrinsic to internal side of plasma membrane [goid 31234] [pmid 10438939] [evidence TAS]; extracellular region [goid 5576] [evidence IEA]

membrane [goid 16020] [pmid 8893809] [evidence TAS]; cytoskeleton [goid 5856] [evidence IEA]

centrosome [goid 5813] [pmid 14654843] [evidence IDA]

extracellular region [goid 5576] [evidence IEA]; extracellular space [goid 5615] [pmid 10881932] [evidence TAS]

nucleus [goid 5634] [evidence IEA]

nucleus [goid 5634] [pmid 8663349] [evidence TAS]; chromatin [goid 785] [evidence IEA]  
extracellular region [goid 5576] [evidence IEA]; transport vesicle [goid 30133] [pmid 11256614] [evidence IDA]  
05), mRNA.

membrane fraction [goid 5624] [pmid 8314870] [evidence TAS]; integral to membrane [goid 16021] [pmid 831

cytoplasm [goid 5737] [evidence ISS]

nucleus [goid 5634] [evidence NAS]

nucleus [goid 5634] [pmid 10918583] [evidence IDA]; cytoplasm [goid 5737] [pmid 10918583] [evidence IDA]  
integral to membrane [goid 16021] [evidence IEA]; postsynaptic membrane [goid 45211] [evidence ISS]; presy

membrane [goid 16020] [evidence IEA]; mitochondrion [goid 5739] [evidence IEA]; integral to membrane [goid 16021]  
nucleus [goid 5634] [pmid 11891224] [evidence IDA]

extracellular matrix (sensu Metazoa) [goid 5578] [evidence IEA]; extracellular space [goid 5615] [pmid 225189]  
membrane [goid 16020] [evidence IEA]; integral to membrane [goid 16021] [evidence IEA]  
cytosol [goid 5829] [evidence NR ]; soluble fraction [goid 5625] [evidence NR ]

membrane fraction [goid 5624] [evidence NR ]; membrane [goid 16020] [evidence IEA]; integral to membrane  
cytosol [goid 5829] [evidence IEA]; proteasome core complex (sensu Eukaryota) [goid 5839] [evidence IEA]  
nucleus [goid 5634] [evidence IEA]

nucleus [goid 5634] [pmid 11509566] [evidence IDA]; cytoplasm [goid 5737] [pmid 11509566] [evidence IDA]  
membrane [goid 16020] [evidence IEA]; integral to membrane [goid 16021] [evidence IEA]; extracellular space

integral to membrane [goid 16021] [evidence ISS]; ubiquitin ligase complex [goid 151] [pmid 12853982] [evidence

nucleus [goid 5634] [pmid 15632002] [evidence IDA]; cytoplasm [goid 5737] [pmid 15632002] [evidence TAS]  
membrane fraction [goid 5624] [pmid 2537311] [evidence TAS]; extracellular region [goid 5576] [evidence NA]  
nucleus [goid 5634] [evidence IEA]

DNA-directed RNA polymerase II, core complex [goid 5665] [pmid 10448078] [evidence TAS]; nucleus [goid 56

nucleus [goid 5634] [pmid 11729309] [evidence IDA]; perinuclear region [goid 48471] [pmid 11555662] [evidence

mitochondrion [goid 5739] [evidence ISS]

chromatin [goid 785] [evidence IEA]; nucleus [goid 5634] [evidence NAS]

nucleus [goid 5634] [pmid 7508441] [evidence TAS]; nucleoplasm [goid 5654] [pmid 12577318] [evidence NAS]  
nucleus [goid 5634] [evidence IEA]

membrane [goid 16020] [evidence IEA]

chromatin [goid 785] [evidence IEA]; transcriptional repressor complex [goid 17053] [pmid 12724404] [evidence



membrane [goid 16020] [evidence IEA]; integral to membrane [goid 16021] [evidence IEA]

intracellular [goid 5622] [evidence IEA]

endoplasmic reticulum [goid 5783] [evidence IEA]; membrane [goid 16020] [evidence IEA]

membrane [goid 16020] [evidence IEA]

nucleus [goid 5634] [pmid 10395741] [evidence IDA]

nucleus [goid 5634] [pmid 7693701] [evidence TAS]

), mRNA.

integral to plasma membrane [goid 5887] [pmid 1376929] [evidence TAS]; membrane [goid 16020] [evidence

nucleus [goid 5634] [evidence IEA]; intracellular [goid 5622] [evidence IEA]

nucleus [goid 5634] [evidence NAS]; intracellular [goid 5622] [evidence IEA]

\ sequence

:e

ice

cDNA clone cs75c04 5, mRNA sequence

:e

049 retrovirus-related reverse transcriptase - rabbit ;contains L1.t2 L1 repetitive element ;, mRNA sequence  
repetitive element ;, mRNA sequence

## Ontology\_Process

protein biosynthesis [goid 6412] [pmid 15883184] [evidence IC ]  
cell differentiation [goid 30154] [evidence IEA]; apoptosis [goid 6915] [evidence IEA]; DNA repair [goid 6281] [  
protein biosynthesis [goid 6412] [pmid 12082018] [evidence NAS]  
transport [goid 6810] [pmid 9827529] [evidence TAS]  
G-protein coupled receptor protein signaling pathway [goid 7186] [evidence IEA]; protein folding [goid 6457] [

skeletal development [goid 1501] [pmid 8955270] [evidence TAS]; central nervous system development [goid  
regulation of transcription, DNA-dependent [goid 6355] [evidence IEA]

pyridine nucleotide biosynthesis [goid 19363] [evidence IEA]; cell-cell signaling [goid 7267] [pmid 8289818] [e

blood coagulation [goid 7596] [evidence IEA]; fibrinolysis [goid 42730] [evidence IEA]; chemotaxis [goid 6935]  
protein amino acid dephosphorylation [goid 6470] [pmid 1849734] [evidence ISS]

id 1842498] [evidence TAS]; integral to membrane [goid 16021] [evidence IEA]  
transcription [goid 6350] [evidence IEA]; transcription from RNA polymerase II promoter [goid 6366] [pmid 87

homophilic cell adhesion [goid 7156] [evidence IEA]  
response to external stimulus [goid 9605] [pmid 9873047] [evidence IEP]; histone phosphorylation [goid 1657

nucleosome assembly [goid 6334] [evidence IEA]; chromosome organization and biogenesis (sensu Eukaryota)

protein biosynthesis [goid 6412] [pmid 8908372] [evidence TAS]; cell proliferation [goid 8283] [pmid 8407955];  
positive regulation of I-kappaB kinase/NF-kappaB cascade [goid 43123] [evidence ISS]

IEA]

regulation of transcription, DNA-dependent [goid 6355] [evidence IEA]; transcription [goid 6350] [evidence IEA]

G-protein coupled receptor protein signaling pathway [goid 7186] [evidence IEA]; signal transduction [goid 7186]

small GTPase mediated signal transduction [goid 7264] [evidence IEA]

antibiotic biosynthesis [goid 17000] [evidence IEA]

calcium ion transport [goid 6816] [evidence IEA]; ion transport [goid 6811] [evidence IEA]; synaptic transmission

electron transport [goid 6118] [evidence IEA]

phototransduction [goid 7602] [pmid 9538874] [evidence TAS]; visual perception [goid 7601] [pmid 10329014]

intracellular signaling cascade [goid 7242] [evidence IEA]

ubiquitin-dependent protein catabolism [goid 6511] [evidence IEA]

ubiquitin cycle [goid 6512] [evidence IEA]

cell cycle [goid 7049] [evidence IEA]; cell division [goid 51301] [evidence IEA]

regulation of transcription, DNA-dependent [goid 6355] [pmid 11137288] [evidence NAS]; development [goid 6355]

metabolism [goid 8152] [evidence IEA]; heparan sulfate proteoglycan metabolism [goid 30201] [pmid 1236829]

cell differentiation [goid 30154] [evidence IEA]; myoblast cell fate determination [goid 7518] [pmid 7756174]

cell differentiation [goid 30154] [evidence IEA]; axonogenesis [goid 7409] [evidence ISS]

metabolism [goid 8152] [evidence IEA]

signal transduction [goid 7165] [evidence NAS]

cellular defense response [goid 6968] [pmid 1644857] [evidence TAS]; regulation of transcription, DNA-dependent

regulation of transcription, DNA-dependent [goid 6355] [evidence NAS]; transcription [goid 6350] [evidence IEA]

transcription [goid 6350] [evidence IEA]; negative regulation of transcription, DNA-dependent [goid 45892] [pmid 11279057]

chloride transport [goid 6821] [pmid 11279057] [evidence ISS]

negative regulation of cell proliferation [goid 8285] [pmid 8632892] [evidence TAS]

regulation of transcription, DNA-dependent [goid 6355] [evidence IEA]; transcription [goid 6350] [evidence IEA]

blood coagulation [goid 7596] [evidence IEA]; G-protein coupled receptor protein signaling pathway [goid 7186]

pyridine nucleotide biosynthesis [goid 19363] [evidence IEA]  
metabolism [goid 8152] [evidence IEA]; steroid biosynthesis [goid 6694] [evidence IEA]

cell surface receptor linked signal transduction [goid 7166] [pmid 9062191] [evidence TAS]  
response to virus [goid 9615] [pmid 2954953] [evidence TAS]; signal transduction [goid 7165] [pmid 2971451]

cell cycle [goid 7049] [evidence IEA]; cytokinesis [goid 910] [pmid 9203580] [evidence ISS]  
immune response [goid 6955] [evidence IEA]

physiological process [goid 7582] [pmid 9630216] [evidence TAS]; cell motility [goid 6928] [pmid 9630216] [evidence IEA]; autophagy [goid 6914] [evidence IEA]; small GTPase mediated signal transduction [goid 7264] [evidence IEA]; cell-cell signaling [goid 7267] [pmid 2521388] [evidence TAS]  
nitrogen compound metabolism [goid 6807] [evidence IEA]  
[goid 5622] [evidence IEA]

small GTPase mediated signal transduction [goid 7264] [evidence IEA]; regulation of small GTPase mediated signal transduction [goid 7264] [evidence IEA]; nitrogen compound metabolism [goid 6807] [evidence IEA]; cell motility [goid 6928] [pmid 9790769] [evidence IEA]; regulation of cell proliferation [goid 42127] [pmid 11481438] [evidence NAS]; negative regulation of cell growth [goid 42127] [pmid 11481438] [evidence NAS]

ubiquitin-dependent protein catabolism [goid 6511] [evidence IEA]  
cell motility [goid 6928] [pmid 10947064] [evidence TAS]; transport [goid 6810] [evidence IEA]; cell-cell signaling [goid 6810] [evidence IEA]

intracellular signaling cascade [goid 7242] [pmid 2540040] [evidence TAS]; protein amino acid phosphorylation [goid 7242] [pmid 2540040] [evidence TAS]

ubiquitin cycle [goid 6512] [evidence IEA]  
regulation of transcription, DNA-dependent [goid 6355] [evidence IEA]; anterior compartment specification [goid 6355] [evidence IEA]  
metabolism [goid 8152] [evidence IEA]; fructose 2,6-bisphosphate metabolism [goid 6003] [evidence IEA]

regulation of transcription, DNA-dependent [goid 6355] [evidence IEA]; transcription [goid 6350] [evidence IEA]; ceramide metabolism [goid 6672] [pmid 8955159] [evidence TAS]; fatty acid metabolism [goid 6631] [evidence IEA]; metabolism [goid 8152] [evidence IEA]; digestion [goid 7586] [pmid 1531127] [evidence TAS]; lipid metabolism [goid 7565] [pmid 7794280] [evidence TAS]

cell motility [goid 6928] [evidence NR ]; blood coagulation [goid 7596] [evidence NR ]; cell adhesion [goid 7151] [evidence IEA]  
transport [goid 6810] [evidence IEA]

glycoprotein catabolism [goid 6516] [pmid 9811929] [evidence TAS]  
regulation of transcription, DNA-dependent [goid 6355] [evidence IEA]; development [goid 7275] [pmid 80940] [evidence IEA]  
metabolism [goid 8152] [evidence IEA]; heparan sulfate proteoglycan metabolism [goid 30201] [pmid 123682] [evidence IEA]  
meiosis [goid 7126] [evidence IEA]  
anti-apoptosis [goid 6916] [pmid 15685448] [evidence IMP]; immune response [goid 6955] [pmid 3017706] [evidence IEA]

nucleosome assembly [goid 6334] [pmid 9119399] [evidence NAS]; chromosome organization and biogenesis [goid 6334] [pmid 9119399] [evidence NAS]  
cell differentiation [goid 30154] [evidence IEA]; angiogenesis [goid 1525] [evidence IEA]; cell motility [goid 6928] [evidence IEA]

DNA repair [goid 6281] [evidence IEA]

transcription from RNA polymerase II promoter [goid 6366] [pmid 9630226] [evidence TAS]; tyrosine phospho

cell motility [goid 6928] [pmid 1689240] [evidence NAS]; blood coagulation [goid 7596] [pmid 8392005] [evid

immune response [goid 6955] [pmid 2307934] [evidence TAS]; signal transduction [goid 7165] [pmid 2307934

regulation of transcription, DNA-dependent [goid 6355] [evidence IEA]; transcription [goid 6350] [evidence IEA/

branched chain family amino acid catabolism [goid 9083] [pmid 11839747] [evidence TAS]; protein amino acid

chemotaxis [goid 6935] [evidence IEA]; sensory perception [goid 7600] [evidence IEA]

metabolism [goid 8152] [evidence IEA]

apoptosis [goid 6915] [pmid 10828065] [evidence TAS]; DNA repair [goid 6281] [pmid 7973727] [evidence TAS

regulation of neurotransmitter secretion [goid 46928] [evidence ISS]; neurotransmitter transport [goid 6836] |

morphogenesis [goid 9653] [pmid 8733128] [evidence TAS]; receptor mediated endocytosis [goid 6898] [pmid

protein biosynthesis [goid 6412] [pmid 15883184] [evidence IC ]

protein kinase cascade [goid 7243] [pmid 9472028] [evidence IDA]; RNA splicing [goid 8380] [pmid 9472028] [

protein amino acid phosphorylation [goid 6468] [evidence IEA]

cell-cell signaling [goid 7267] [pmid 2521388] [evidence TAS]

glycogen metabolism [goid 5977] [evidence IEA]; carbohydrate metabolism [goid 5975] [evidence IEA]

regulation of transcription [goid 45449] [evidence IEA]; regulation of transcription, DNA-dependent [goid 6355

protein biosynthesis [goid 6412] [pmid 10049785] [evidence TAS]; phenylalanyl-tRNA aminoacylation [goid 64

RNA processing [goid 6396] [pmid 8634703] [evidence TAS]

immune response [goid 6955] [evidence IEA]

ubiquitin-dependent protein catabolism [goid 6511] [evidence IEA]; spermatogenesis [goid 7283] [pmid 93846

phagocytosis, recognition [goid 6910] [pmid 11567029] [evidence IDA]; cell recognition [goid 8037] [pmid 115

regulation of transcription, DNA-dependent [goid 6355] [evidence IEA]; transcription [goid 6350] [evidence IEA/

regulation of actin polymerization and/or depolymerization [goid 8064] [evidence NAS]; cytoskeleton organiza

cell proliferation [goid 8283] [pmid 7829091] [evidence TAS]; regulation of transcription, DNA-dependent [goid

metabolism [goid 8152] [evidence IEA]; steroid biosynthesis [goid 6694] [evidence IEA]

nuclear mRNA splicing, via spliceosome [goid 398] [evidence IEA]

protein amino acid phosphorylation [goid 6468] [evidence IEA]

immune response [goid 6955] [evidence IEA]; apoptosis [goid 6915] [evidence NR ]; regulation of transcription

barrier septum formation [goid 917] [evidence IEA]; protein localization [goid 8104] [pmid 11274158] [evidence

rRNA processing [goid 6364] [pmid 11110791] [evidence IDA]

regulation of G-protein coupled receptor protein signaling pathway [goid 8277] [pmid 10747990] [evidence TAS]

protein amino acid phosphorylation [goid 6468] [pmid 7598724] [evidence TAS]

macrophage chemotaxis [goid 48246] [pmid 11415443] [evidence IDA]; lymphocyte chemotaxis [goid 48247] [pmid 11415443] [evidence IDA]

electron transport [goid 6118] [evidence IEA]

biosynthesis [goid 9058] [evidence IEA]

cell-cell signaling [goid 7267] [evidence NR ]; positive regulation of fibroblast proliferation [goid 48146] [pmid 11415443] [evidence IDA]; regulation of transcription, DNA-dependent [goid 6355] [evidence IEA]

transcription [goid 6350] [evidence IEA]; regulation of transcription from RNA polymerase II promoter [goid 6350] [evidence IEA]

cell-cell signaling [goid 7267] [pmid 3313057] [evidence TAS]; inflammatory response [goid 6954] [pmid 3313057] [evidence TAS]

transport [goid 6810] [evidence IEA]

homophilic cell adhesion [goid 7156] [evidence ISS]

biosynthesis [goid 9058] [evidence IEA]; histidine catabolism [goid 6548] [evidence IEA]

metabolism [goid 8152] [evidence IEA]

ubiquitin-dependent protein catabolism [goid 6511] [evidence IEA]

cytoplasmic transport [goid 5783] [evidence IEA]

protein transport [goid 15031] [evidence IEA]; exocytosis [goid 6887] [evidence IEA]

transcription initiation from RNA polymerase II promoter [goid 6367] [pmid 12218053] [evidence IDA]; fat cell differentiation [goid 6367] [pmid 12218053] [evidence IDA]

cell motility [goid 6928] [pmid 9177352] [evidence TAS]; G-protein signaling, coupled to IP3 second messenger production [goid 6928] [pmid 9177352] [evidence TAS]; glycolysis [goid 6096] [evidence IEA]

protein biosynthesis [goid 6412] [evidence IEA]

cellular defense response [goid 6968] [pmid 10359581] [evidence TAS]; cell surface receptor linked signal transduction [goid 6968] [pmid 10359581] [evidence TAS]; immune response [goid 6955] [pmid 1737380] [evidence NAS]

ubiquitin cycle [goid 6512] [evidence IEA]; oxygen transport [goid 15671] [evidence IEA]

regulation of transcription, DNA-dependent [goid 6355] [pmid 7557990] [evidence NAS]; transcription [goid 6355] [pmid 7557990] [evidence NAS]; immune response [goid 6955] [pmid 2139735] [evidence TAS]

positive regulation of transcription, DNA-dependent [goid 45893] [pmid 8378084] [evidence IDA]; transcription initiation from RNA polymerase II promoter [goid 45893] [pmid 8378084] [evidence IDA]; cell surface receptor linked signal transduction [goid 7166] [pmid 9367539] [evidence NAS]

protein amino acid dephosphorylation [goid 6470] [pmid 8798755] [evidence TAS]

apoptosis [goid 6915] [evidence IEA]

regulation of muscle contraction [goid 6937] [evidence NR ]  
inflammatory response [goid 6954] [pmid 3313057] [evidence TAS]  
folic acid transport [goid 15884] [pmid 8110752] [evidence TAS]  
biological process unknown [goid 4] [evidence ND ]  
brain development [goid 7420] [pmid 10915792] [evidence NAS]; cell proliferation [goid 8283] [pmid 8090221]  
positive regulation of interleukin-6 biosynthesis [goid 45410] [pmid 12077222] [evidence ISS]; positive regulat  
protein biosynthesis [goid 6412] [evidence IEA]  
acute-phase response [goid 6953] [pmid 2970990] [evidence TAS]

protein amino acid dephosphorylation [goid 6470] [pmid 9684878] [evidence TAS]  
B cell differentiation [goid 30183] [pmid 9000136] [evidence NAS]; cell growth [goid 16049] [pmid 9000136] [evidence TAS];  
respiratory gaseous exchange [goid 7585] [pmid 10391245] [evidence TAS]; defense response [goid 6952] [pmid 10391245] [evidence TAS]

leukotriene metabolism [goid 6691] [pmid 8486631] [evidence TAS]; electron transport [goid 6118] [evidence TAS]  
protein modification [goid 6464] [evidence IEA]

protein biosynthesis [goid 6412] [pmid 15883184] [evidence IC ]

regulation of translation [goid 6445] [pmid 16488880] [evidence TAS]; mRNA catabolism, nonsense-mediated

regulation of muscle contraction [goid 6937] [evidence NR ]  
regulation of GTPase activity [goid 43087] [pmid 10859313] [evidence IDA]

immune response [goid 6955] [pmid 10835685] [evidence TAS]

neuromuscular synaptic transmission [goid 7274] [evidence ISS]; anterograde axon cargo transport [goid 8089]  
regulation of transcription, DNA-dependent [goid 6355] [evidence IEA]; development [goid 7275] [pmid 11856]

protein stabilization [goid 50821] [pmid 10608892] [evidence IEP]; apoptosis [goid 6915] [pmid 14660608] [evidence TAS]  
chromatin modification [goid 16568] [evidence IEA]; regulation of transcription, DNA-dependent [goid 6355] [evidence IEA]  
mitotic spindle assembly [goid 51227] [pmid 15851029] [evidence IDA]  
regulation of cell adhesion [goid 30155] [pmid 12606567] [evidence IDA]

apoptosis [goid 6915] [pmid 10488071] [evidence TAS]; RNA processing [goid 6396] [pmid 10488071] [evidence TAS]  
regulation of transcription, DNA-dependent [goid 6355] [evidence IEA]  
transport [goid 6810] [evidence IEA]; carbohydrate transport [goid 8643] [evidence IEA]  
ion transport [goid 6811] [evidence IEA]; sodium ion transport [goid 6814] [evidence IEA]

xenobiotic metabolism [goid 6805] [pmid 11522286] [evidence IDA]; inflammatory response [goid 6954] [pmid 11522286] [evidence TAS]



IEA]

protein transport [goid 15031] [evidence IEA]  
ubiquitin cycle [goid 6512] [evidence IEA]; apoptosis [goid 6915] [evidence IEA]

regulation of translational initiation [goid 6446] [evidence ISS]; protein biosynthesis [goid 6412] [evidence IEA]  
protein biosynthesis [goid 6412] [evidence IEA]

immune response [goid 6955] [evidence IEA]; cell proliferation [goid 8283] [pmid 10908663] [evidence TAS]; s  
antimicrobial humoral response (sensu Vertebrata) [goid 19735] [evidence NR ]; induction of apoptosis via de  
negative regulation of signal transduction [goid 9968] [evidence IEA]  
immune response [goid 6955] [evidence IEA]; cytosol to ER transport [goid 46967] [pmid 11133832] [evidence

morphogenesis [goid 9653] [pmid 9888994] [evidence TAS]; regulation of transcription, DNA-dependent [goid  
ubiquitin-dependent protein catabolism [goid 6511] [evidence IEA]  
transport [goid 6810] [pmid 9653196] [evidence TAS]; response to nutrient [goid 7584] [pmid 9653196] [evid

positive regulation of transcription [goid 45941] [pmid 9887100] [evidence IDA]; regulation of transcription, D

IEA]

glucose metabolism [goid 6006] [pmid 9495343] [evidence TAS]; signal transduction [goid 7165] [pmid 767508]  
angiogenesis [goid 1525] [evidence IEA]; cell differentiation [goid 30154] [evidence IEA]

B cell differentiation [goid 30183] [pmid 12711221] [evidence TAS]; transcription [goid 6350] [evidence IEA]; r  
regulation of transcription, DNA-dependent [goid 6355] [evidence IEA]; transcription [goid 6350] [evidence IEA]  
G-protein coupled receptor protein signaling pathway [goid 7186] [pmid 12065583] [evidence NAS]; signal tra  
protein amino acid phosphorylation [goid 6468] [pmid 8621389] [evidence TAS]  
small GTPase mediated signal transduction [goid 7264] [evidence IEA]; cell cycle [goid 7049] [evidence IEA]

nuclear mRNA splicing, via spliceosome [goid 398] [evidence NAS]  
cell motility [goid 6928] [pmid 9230079] [evidence TAS]; regulation of actin filament polymerization [goid 308]  
nucleosome assembly [goid 6334] [evidence IEA]; chromosome organization and biogenesis (sensu Eukaryota)  
nucleotide metabolism [goid 9117] [evidence IEA]; pyrimidine nucleoside metabolism [goid 6213] [pmid 1094]  
protein biosynthesis [goid 6412] [evidence IEA]

development [goid 7275] [pmid 8202488] [evidence TAS]; humoral immune response [goid 6959] [pmid 82024

chromatin assembly or disassembly [goid 6333] [evidence IEA]

immune response [goid 6955] [evidence IEA]; antimicrobial humoral response (sensu Vertebrata) [goid 19735]

protein amino acid phosphorylation [goid 6468] [pmid 9154127] [evidence TAS]

induction of apoptosis [goid 6917] [pmid 10426996] [evidence TAS]; innate immune response [goid 45087] [evidence IEA]; transport [goid 6810] [evidence IEA]

cytoplasmic sequestering of NF-kappaB [goid 7253] [evidence NAS]; apoptosis [goid 6915] [pmid 10747850] [evidence IEA]

transport [goid 6810] [evidence IEA]

ubiquitin cycle [goid 6512] [evidence IEA]

regulation of actin polymerization and/or depolymerization [goid 8064] [pmid 8838802] [evidence TAS]; sequestration

small GTPase mediated signal transduction [goid 7264] [evidence IEA]; protein amino acid phosphorylation [goid 6468] [pmid 9154127] [evidence TAS]; protein complex assembly [goid 6461] [pmid 12047747] [evidence NAS]; immune response [goid 6955] [evidence IEA]

immune response [goid 6955] [pmid 8999896] [evidence TAS]; chemokine biosynthesis [goid 42033] [pmid 11111111] [evidence IEA]; protein complex assembly [goid 6461] [pmid 8643484] [evidence TAS]; receptor mediated endocytosis [goid 6810] [evidence IEA]

chromatin assembly or disassembly [goid 6333] [evidence IEA]

homophilic cell adhesion [goid 7156] [evidence IEA]; cell adhesion [goid 7155] [pmid 2384753] [evidence TAS]

glycogen metabolism [goid 5977] [evidence IEA]; carbohydrate metabolism [goid 5975] [evidence IEA]

lipid transport [goid 6869] [evidence IEA]; steroid metabolism [goid 8202] [evidence IEA]

neutrophil activation [goid 42119] [pmid 10878382] [evidence IDA]; G-protein signaling, coupled to IP3 second messenger [goid 7242] [evidence IEA]; intracellular signaling cascade [goid 7242] [evidence IEA]

lipid metabolism [goid 6629] [pmid 10429365] [evidence TAS]

microtubule-based movement [goid 7018] [evidence IEA]; protein polymerization [goid 51258] [evidence IEA]

lipid transport [goid 6869] [evidence IEA]; steroid metabolism [goid 8202] [evidence IEA]

G-protein coupled receptor protein signaling pathway [goid 7186] [evidence IEA]; signal transduction [goid 7186] [evidence IEA]

skin development [goid 43588] [evidence ISS]; keratinocyte differentiation [goid 30216] [pmid 12850301] [evidence IEA]; regulation of cell growth [goid 1558] [evidence IEA]

negative regulation of cell proliferation [goid 8285] [pmid 9551928] [evidence TAS]; chemotaxis [goid 6935] [pmid 10429365] [evidence IEA]

regulation of transcription, DNA-dependent [goid 6355] [evidence IEA]; transcription [goid 6350] [evidence IEA]

chromatin modification [goid 16568] [evidence IEA]; regulation of transcription, DNA-dependent [goid 6355] [evidence IEA];  
regulation of transcription, DNA-dependent [goid 6355] [evidence IEA];  
ubiquitin cycle [goid 6512] [evidence IEA];  
negative regulation of transcription [goid 16481] [pmid 9488487] [evidence NAS];  
regulation of transcription [goid 45449] [evidence IEA]; regulation of transcription, DNA-dependent [goid 6355] [evidence IEA];  
positive regulation of long-term neuronal synaptic plasticity [goid 48170] [evidence ISS]; homophilic cell adhesion [goid 7156] [evidence IEA];  
electron transport [goid 6118] [evidence IEA];  
regulation of transcription, DNA-dependent [goid 6355] [evidence IEA]; negative regulation of transcription [goid 16481] [pmid 9488487] [evidence NAS];  
mesoderm development [goid 7498] [pmid 9520419] [evidence TAS]; intracellular signaling cascade [goid 7242] [pmid 8192856] [evidence TAS];  
peptidoglycan metabolism [goid 270] [evidence IEA]; macrophage differentiation [goid 30225] [pmid 2251898] [evidence TAS];  
metabolism [goid 8152] [evidence IEA]; phospholipid biosynthesis [goid 8654] [evidence IEA];  
cellular defense response [goid 6968] [pmid 1692159] [evidence TAS]; superoxide metabolism [goid 6801] [evidence TAS];  
protein kinase cascade [goid 7243] [pmid 9890973] [evidence IDA]; response to stress [goid 6950] [pmid 9890973] [evidence IDA];  
leukotriene biosynthesis [goid 19370] [evidence IEA]; inflammatory response [goid 6954] [pmid 2300173] [evidence TAS];  
immune response [goid 6955] [evidence IEA]; ubiquitin-dependent protein catabolism [goid 6511] [evidence IEA];  
DNA replication initiation [goid 6270] [evidence IEA]; transcription [goid 6350] [evidence IEA]; DNA replication [goid 6270] [evidence IEA];  
protein kinase cascade [goid 7243] [pmid 11509566] [evidence IDA]; regulation of mRNA processing [goid 506] [evidence IEA];  
chemotaxis [goid 6935] [evidence IEA];  
ubiquitin cycle [goid 6512] [evidence IEA]; protein ubiquitination during ubiquitin-dependent protein catabolism [goid 6511] [evidence IEA];  
neuromuscular junction development [goid 7528] [evidence NR ]; RNA processing [goid 6396] [pmid 9887331] [evidence TAS];  
defense response [goid 6952] [evidence NAS]; pregnancy [goid 7565] [pmid 7794280] [evidence TAS];  
regulation of transcription, DNA-dependent [goid 6355] [evidence IEA]; transcription [goid 6350] [evidence IEA];  
protein biosynthesis [goid 6412] [evidence IEA];  
transcription [goid 6350] [evidence IEA]; regulation of transcription, DNA-dependent [goid 6355] [evidence IEA];  
intracellular signaling cascade [goid 7242] [pmid 8192856] [evidence TAS]; nucleocytoplasmic transport [goid 6396] [pmid 9887331] [evidence TAS];  
neurotransmitter catabolism [goid 42135] [pmid 15528998] [evidence NAS]; behavior [goid 7610] [pmid 1191111] [evidence TAS];  
chromatin modification [goid 16568] [evidence IEA]; chromatin assembly or disassembly [goid 6333] [evidence IEA];  
immune response [goid 6955] [pmid 7508441] [evidence TAS];  
chromatin modification [goid 16568] [evidence IEA]; transcription [goid 6350] [evidence IEA]; regulation of transcription [goid 6350] [evidence IEA];  
homophilic cell adhesion [goid 7156] [evidence IEA];  
transcription [goid 6350] [evidence IEA]; chromatin assembly or disassembly [goid 6333] [evidence IEA]; negative regulation of transcription [goid 16481] [pmid 9488487] [evidence NAS];

ion transport [goid 6811] [evidence IEA]; sodium ion transport [goid 6814] [evidence IEA]

cell surface receptor linked signal transduction [goid 7166] [pmid 9038203] [evidence TAS]  
small GTPase mediated signal transduction [goid 7264] [evidence IEA]; protein transport [goid 15031] [evidence IEA]; response to xenobiotic stimulus [goid 9410] [pmid 7961644] [evidence IDA]; transcription from RNA polymerase II promoter [goid 6350] [evidence IEA]

signal transduction [goid 7165] [evidence IEA]  
regulation of transcription, DNA-dependent [goid 6355] [evidence IEA]; transcription [goid 6350] [evidence IEA]  
nitrogen compound metabolism [goid 6807] [evidence IEA]; glutamine biosynthesis [goid 6542] [evidence IEA]

cell proliferation [goid 8283] [pmid 1376929] [evidence TAS]; signal transduction [goid 7165] [pmid 1376929]  
protein folding [goid 6457] [evidence IEA]  
positive regulation of transcription from RNA polymerase II promoter [goid 45944] [pmid 15888726] [evidence IEA]  
regulation of transcription, DNA-dependent [goid 6355] [evidence IEA]



## Ontology\_Function

structural constituent of ribosome [goid 3735] [pmid 15883184] [evidence IDA]  
protein binding [goid 5515] [pmid 15383276] [evidence IPI]  
structural constituent of ribosome [goid 3735] [pmid 15883184] [evidence IDA]  
ATPase activity, coupled to transmembrane movement of substances [goid 42626] [evidence IEA]; organic anion  
transporter activity [goid 3924] [pmid 7665596] [evidence TAS]; heat shock protein binding [goid 31072] [evidence

transferase activity [goid 16740] [evidence IEA]; nucleotide binding [goid 166] [evidence IEA]; ATP binding [goid 166]  
sequence-specific DNA binding [goid 43565] [evidence IEA]; transcription factor activity [goid 3700] [evidence

transferase activity, transferring glycosyl groups [goid 16757] [evidence IEA]; cytokine activity [goid 5125] [pmid 8791232] [evidence

serine-type endopeptidase activity [goid 4252] [evidence IEA]; kinase activity [goid 16301] [evidence IEA]; plasminogen activator  
protein phosphatase type 2A regulator activity [goid 8601] [pmid 8392071] [evidence TAS]; calcium ion binding  
binding [goid 5488] [evidence IEA]  
protein binding [goid 5515] [pmid 15205336] [evidence IPI]  
transferase activity [goid 16740] [evidence IEA]; DNA-directed RNA polymerase activity [goid 3899] [pmid 8791232] [evidence

calcium ion binding [goid 5509] [evidence IEA]  
transferase activity [goid 16740] [evidence IEA]; metalloproteinase activity [goid 8237] [evidence IEA]; ATP binding  
receptor activity [goid 4872] [evidence IEA]; calcium ion binding [goid 5509] [evidence NAS]

DNA binding [goid 3677] [evidence IEA]  
electron carrier activity [goid 9055] [evidence IEA]; protein disulfide oxidoreductase activity [goid 15035] [evidence IEA]

RNA binding [goid 3723] [pmid 8908372] [evidence TAS]; metal ion binding [goid 46872] [evidence IEA]; zinc ion binding [goid 8270] [evidence IEA]; zinc ion receptor activity [goid 4872] [evidence IEA]

receptor activity [goid 4872] [pmid 1358805] [evidence TAS]; hematopoietin/interferon-class (D200-domain) receptor activity [goid 4872] [evidence IEA]

zinc ion binding [goid 8270] [pmid 9576949] [evidence NAS]; metal ion binding [goid 46872] [evidence IEA]; protein binding [goid 5515] [pmid 15652350] [evidence IPI]; calcium ion binding [goid 5509] [evidence IEA]

receptor activity [goid 4872] [evidence IEA]; rhodopsin-like receptor activity [goid 1584] [evidence IEA]

hydrolase activity [goid 16787] [evidence IEA]

guanyl-nucleotide exchange factor activity [goid 5085] [evidence IEA]

oxidoreductase activity [goid 16491] [evidence IEA]; calcium ion binding [goid 5509] [evidence IEA]

voltage-gated calcium channel activity [goid 5245] [pmid 8071363] [evidence TAS]; ion channel activity [goid 5245] [evidence TAS]; disulfide oxidoreductase activity [goid 15036] [evidence IEA]; FAD binding [goid 50660] [evidence IEA]; dihydrofolate reductase activity [goid 50660] [evidence TAS]; synaptic transmission [goid 7268] [pmid 9538874] [evidence TAS]

peptidase activity [goid 8233] [evidence IEA]; ubiquitin thiolesterase activity [goid 4221] [evidence IEA]; cysteine protease activity [goid 4221] [evidence IEA]

ubiquitin-protein ligase activity [goid 4842] [evidence IEA]

zinc ion binding [goid 8270] [evidence IEA]; metal ion binding [goid 46872] [evidence IEA]; protein binding [goid 5515] [pmid 15652350] [evidence IPI]

sequence-specific DNA binding [goid 43565] [evidence IEA]; transcription factor activity [goid 3700] [pmid 111111] [evidence NAS]; zinc ion binding [goid 8270] [evidence IEA]; nucleic acid binding [goid 3676] [evidence IEA]

hydrolase activity [goid 16787] [evidence IEA]; sulfuric ester hydrolase activity [goid 8484] [evidence IEA]; aryl sulfatase activity [goid 8484] [evidence IEA]; binding [goid 5488] [evidence IEA]

GPI anchor binding [goid 48503] [evidence IEA]

oxidoreductase activity [goid 16491] [evidence IEA]

hydrolase activity [goid 16787] [evidence IEA]; 3',5'-cyclic-nucleotide phosphodiesterase activity [goid 4114] [evidence IEA]; DNA binding [goid 3677] [evidence IEA]

transcription factor activity [goid 3700] [evidence NAS]; DNA binding [goid 3677] [evidence IEA]

protein binding [goid 5515] [pmid 15652350] [evidence IPI]

chloride channel activity [goid 5254] [pmid 11279057] [evidence ISS]

SH3/SH2 adaptor activity [goid 5070] [pmid 8632892] [evidence TAS]; protein binding [goid 5515] [pmid 8632892] [evidence TAS]

zinc ion binding [goid 8270] [evidence IEA]; metal ion binding [goid 46872] [evidence IEA]; hematopoietin/interferon-class (D200-domain) receptor activity [goid 4872] [evidence IEA]; structural molecule activity [goid 5198] [pmid 7557986] [evidence TAS]

thrombin receptor activity [goid 15057] [evidence IEA]; receptor binding [goid 5102] [pmid 8615752] [evidence IEA]

kinase activity [goid 16301] [evidence IEA]; ATP binding [goid 5524] [evidence IEA]; transferase activity [goid 16491] [evidence IEA]; oxidoreductase activity [goid 16491] [evidence IEA]

cytokine binding [goid 19955] [evidence IEA]; receptor activity [goid 4872] [evidence IEA]; interferon-gamma r

GTPase activity [goid 3924] [pmid 9203580] [evidence ISS]; nucleotide binding [goid 166] [evidence IEA]; GTP I  
sugar binding [goid 5529] [evidence IEA]

oxidoreductase activity [goid 16491] [evidence IEA]; oxidoreductase activity, acting on single donors with inco  
GTP binding [goid 5525] [evidence IEA]; nucleotide binding [goid 166] [evidence IEA]

zinc ion binding [goid 8270] [evidence IEA]; metal ion binding [goid 46872] [evidence IEA]; neprilysin activity [g  
zinc ion binding [goid 8270] [evidence IEA]; metal ion binding [goid 46872] [evidence IEA]; beta-ureidopropion  
RNA polymerase II transcription factor activity [goid 3702] [evidence NR ]; single-stranded RNA binding [goid 3

guanyl-nucleotide exchange factor activity [goid 5085] [evidence IEA]; protein binding [goid 5515] [pmid 9748  
hydrolase activity, acting on carbon-nitrogen (but not peptide) bonds, in linear amides [goid 16811] [evidence  
cytokine activity [goid 5125] [pmid 11481438] [evidence NAS]

zinc ion binding [goid 8270] [evidence IEA]; metal ion binding [goid 46872] [evidence IEA]; peptidase activity [g  
thiol-disulfide exchange intermediate activity [goid 30508] [pmid 10947064] [evidence TAS]; protein disulfide  
hydrolase activity [goid 16787] [evidence IEA]; acid phosphatase activity [goid 3993] [evidence IEA]

kinase activity [goid 16301] [evidence IEA]; cAMP-dependent protein kinase regulator activity [goid 8603] [pm  
hydrolase activity [goid 16787] [evidence IEA]; 5'-nucleotidase activity [goid 8253] [pmid 7999131] [evidence  
ligase activity [goid 16874] [evidence IEA]; ubiquitin-protein ligase activity [goid 4842] [evidence IEA]; protein  
sequence-specific DNA binding [goid 43565] [evidence IEA]; transcription factor activity [goid 3700] [evidence  
kinase activity [goid 16301] [evidence IEA]; transferase activity [goid 16740] [evidence IEA]; hydrolase activity

receptor activity [goid 4872] [evidence IEA]

transferase activity, transferring acyl groups, acyl groups converted into alkyl on transfer [goid 46912] [eviden  
ligase activity [goid 16874] [evidence IEA]; magnesium ion binding [goid 287] [evidence IEA]; long-chain-fatty-

signal transducer activity [goid 4871] [pmid 8751720] [evidence TAS]; structural molecule activity [goid 5198]  
transporter activity [goid 5215] [evidence IEA]

hyaluronoglucosaminidase activity [goid 4415] [pmid 9811929] [evidence TAS]

sequence-specific DNA binding [goid 43565] [evidence IEA]; transcription factor activity [goid 3700] [evidence  
hydrolase activity [goid 16787] [evidence IEA]; sulfuric ester hydrolase activity [goid 8484] [evidence IEA]; aryl  
RNA binding [goid 3723] [evidence IEA]; nucleic acid binding [goid 3676] [evidence IEA]; nucleotide binding [g  
protein binding [goid 5515] [pmid 15685448] [evidence IPI]

DNA binding [goid 3677] [pmid 9119399] [evidence NAS]

receptor activity [goid 4872] [evidence IEA]; protein binding [goid 5515] [evidence IEA]



DNA binding [goid 3677] [evidence IEA]

transcription factor activity [goid 3700] [pmid 10848577] [evidence TAS]; hematopoietin/interferon-class (D2C

GPI anchor binding [goid 48503] [evidence IEA]; enzyme binding [goid 19899] [pmid 14688365] [evidence IPI];

receptor activity [goid 4872] [evidence IEA]; interleukin-4 receptor activity [goid 4913] [pmid 2307934] [evidence IEA]; zinc ion binding [goid 8270] [evidence IEA]; metal ion binding [goid 46872] [evidence IEA]; DNA binding [goid 3677] [evidence IEA]; kinase activity [goid 16301] [pmid 11839747] [evidence TAS]; ATP binding [goid 5524] [evidence IEA]; nucleotide binding [goid 166] [evidence IEA]; cytokine activity [goid 5125] [evidence IEA]

zinc ion binding [goid 8270] [evidence IEA]; alkaline phosphatase activity [goid 4035] [pmid 3042787] [evidence IEA]; cell cycle [goid 7049] [evidence IEA]; cell cycle arrest [goid 7050] [pmid 10747892] [evidence TAS]

molecular function unknown [goid 5554] [evidence ND ]

binding [goid 5488] [evidence IEA]; signal transducer activity [goid 4871] [pmid 8844170] [evidence TAS]

structural constituent of ribosome [goid 3735] [pmid 15883184] [evidence IDA]

transferase activity [goid 16740] [evidence IEA]; nucleotide binding [goid 166] [evidence IEA]; ATP binding [goid 5524] [evidence IEA]; transferase activity [goid 16740] [evidence IEA]; protein serine/threonine kinase activity [goid 16301] [pmid 11839747] [evidence TAS]

zinc ion binding [goid 8270] [evidence IEA]; metal ion binding [goid 46872] [evidence IEA]; neprilysin activity [goid 4913] [pmid 2307934] [evidence IEA]; pyridoxal phosphate binding [goid 30170] [evidence IEA]; nucleotide binding [goid 166] [evidence IEA]; phosphatase activity [goid 4035] [pmid 3042787] [evidence IEA]

development [goid 7275] [evidence IEA]; frizzled signaling pathway [goid 7222] [evidence IEA]; phenylalanine-tRNA ligase activity [goid 4826] [pmid 10049785] [evidence TAS]; ligase activity [goid 16874] [evidence IEA]; protein serine/threonine kinase activity [goid 16301] [pmid 11839747] [evidence TAS]

RNA binding [goid 3723] [pmid 8634703] [evidence TAS]; nucleic acid binding [goid 3676] [evidence IEA]; nucleotide binding [goid 166] [evidence IEA];

binding [goid 5488] [evidence IEA]

calcium-dependent phospholipid binding [goid 5544] [evidence IEA]; ubiquitin thiolesterase activity [goid 4221] [evidence IEA];

pattern recognition receptor activity [goid 8329] [pmid 11567029] [evidence IDA]; MHC protein binding [goid 5515] [pmid 16169070] [evidence IPI]; transcription corepressor activity [goid 3714] [pmid 9651585] [evidence TAS]; protein binding [goid 5515] [pmid 16169070] [evidence IPI]; binding [goid 5488] [evidence IEA]

actin binding [goid 3779] [evidence NAS]; protein binding [goid 5515] [pmid 16169070] [evidence IPI]; phosphatase activity [goid 4035] [pmid 3042787] [evidence IEA]; transcription corepressor activity [goid 3714] [pmid 8425218] [evidence TAS]; transcription factor activity [goid 3700] [pmid 10848577] [evidence TAS]; oxidoreductase activity [goid 16491] [evidence IEA]; estradiol 17-beta-dehydrogenase activity [goid 4303] [evidence IEA]; RNA binding [goid 3723] [evidence IEA]; nucleotide binding [goid 166] [evidence IEA]

calmodulin binding [goid 5516] [evidence IEA]; ATP binding [goid 5524] [evidence IEA]; transferase activity [goid 16740] [evidence IEA];

transferase activity [goid 16740] [evidence IEA]; eukaryotic translation initiation factor 2alpha kinase activity [goid 4303] [evidence IEA]; cytoskeletal adaptor activity [goid 8093] [pmid 11274158] [evidence NAS]; protein binding [goid 5515] [evidence IEA];

exonuclease activity [goid 4527] [evidence IEA]; 3'-5'-exoribonuclease activity [goid 175] [pmid 11110791] [evidence IEA]

calmodulin binding [goid 5516] [pmid 10747990] [evidence TAS]; signal transducer activity [goid 4871] [evidence TAS];

enzyme activator activity [goid 8047] [pmid 8798479] [evidence TAS]; protein kinase inhibitor activity [goid 4871] [evidence TAS];

chemokine activity [goid 8009] [pmid 11415443] [evidence IDA]

zinc ion binding [goid 8270] [evidence IEA]; metal ion binding [goid 46872] [evidence IEA]; electron carrier activity [goid 4871] [evidence TAS]; catalytic activity [goid 3824] [evidence IEA]; isomerase activity [goid 16853] [evidence IEA]

protein homodimerization activity [goid 42803] [pmid 10913138] [evidence IDA]; S100 beta binding [goid 4811] [evidence TAS]; zinc ion binding [goid 8270] [evidence IEA]; nucleic acid binding [goid 3676] [evidence IEA]

RNA polymerase II transcription factor activity [goid 3702] [pmid 9919311] [evidence TAS]; DNA binding [goid 3677] [evidence IEA]; signal transducer activity [goid 4871] [pmid 3313057] [evidence TAS]; calcium ion binding [goid 5509] [pmid 20037] [evidence IEA];

receptor activity [goid 4872] [evidence IEA]

retinal binding [goid 16918] [evidence IEA]; retinol binding [goid 19841] [evidence IEA]; lipid binding [goid 828] [evidence IEA];

protein homodimerization activity [goid 42803] [evidence ISS]; coreceptor activity [goid 15026] [pmid 965700] [evidence TAS]; protein binding [goid 5515] [evidence IEA]; zinc ion binding [goid 8270] [evidence IEA]; metal ion binding [goid 46872] [evidence IEA]; lyase activity [goid 16829] [evidence IEA]; ammonia ligase activity [goid 16211] [evidence IEA]; histidine ammonia-lyase activity [goid 16787] [evidence IEA]; calcium ion binding [goid 5509] [evidence IEA]; arylsulfatase activity [goid 4221] [evidence IEA]; cysteine-type endopeptidase activity [goid 4197] [evidence IEA];

protein binding [goid 5515] [pmid 16189514] [evidence IPI]

DNA binding [goid 3677] [evidence IEA]; ATP binding [goid 5524] [evidence IEA]; ligand-dependent nuclear receptor activity [goid 4872] [evidence IEA];

nucleotide binding [goid 166] [pmid 8702478] [evidence TAS]; leukotriene receptor activity [goid 4974] [pmid 1239] [evidence TAS]; kinase activity [goid 16301] [evidence IEA]; transferase activity [goid 16740] [evidence IEA]; nucleotide binding [goid 166] [evidence IEA]; structural constituent of ribosome [goid 3735] [evidence IEA]

transferase activity [goid 16740] [evidence IEA]; protein phosphatase inhibitor activity [goid 4864] [pmid 1239] [evidence TAS];

coreceptor activity [goid 15026] [pmid 10359581] [evidence TAS]

MHC class I receptor activity [goid 30106] [evidence IEA]

oxygen transporter activity [goid 5344] [evidence IEA]; heme binding [goid 20037] [evidence IEA]; ligase activity [goid 4871] [evidence TAS]; nucleotide binding [goid 166] [evidence IEA]

zinc ion binding [goid 8270] [evidence IEA]; metal ion binding [goid 46872] [evidence IEA]; transcription factor activity [goid 4871] [evidence TAS]; receptor activity [goid 4872] [evidence IEA]; IgG binding [goid 19864] [evidence IEA]; GPI anchor binding [goid 4871] [evidence TAS]; sequence-specific DNA binding [goid 43565] [evidence IEA]; protein dimerization activity [goid 46983] [evidence IEA]; receptor activity [goid 4872] [evidence IEA]; interleukin-17 receptor activity [goid 30368] [pmid 9367539] [evidence TAS]; transmembrane receptor protein tyrosine phosphatase activity [goid 5001] [pmid 8798755] [evidence TAS]; receptor activity [goid 4872] [evidence IEA]; zinc ion binding [goid 8270] [evidence IEA]; metal ion binding [goid 46872] [evidence IEA]; peptidase activity [goid 4871] [evidence TAS];

actin binding [goid 3779] [evidence IEA]  
calcium ion binding [goid 5509] [pmid 2149559] [evidence TAS]  
folic acid binding [goid 5542] [pmid 8110752] [evidence TAS]; receptor activity [goid 4872] [evidence IEA]  
molecular function unknown [goid 5554] [evidence ND ]  
cadherin binding [goid 45296] [evidence ISS]; protein kinase activity [goid 4672] [pmid 7592934] [evidence TA  
transferase activity [goid 16740] [evidence IEA]; transmembrane receptor activity [goid 4888] [pmid 11081518]

structural constituent of ribosome [goid 3735] [evidence IEA]  
binding [goid 5488] [evidence IEA]

hydrolase activity [goid 16787] [evidence IEA]; magnesium ion binding [goid 287] [evidence IEA]; manganese ion  
transcriptional activator activity [goid 16563] [pmid 9689109] [evidence TAS]; DNA binding [goid 3677] [evidence  
leukotriene receptor activity [goid 4974] [pmid 10391245] [evidence TAS]; receptor activity [goid 4872] [evidence

iron ion binding [goid 5506] [evidence IEA]; monooxygenase activity [goid 4497] [pmid 8486631] [evidence TA  
protein phosphatase inhibitor activity [goid 4864] [evidence IEA]; actin binding [goid 3779] [evidence IEA]  
protein-L-isoaspartate (D-aspartate) O-methyltransferase activity [goid 4719] [evidence IEA]

structural constituent of ribosome [goid 3735] [pmid 15883184] [evidence IDA]

protein binding [goid 5515] [pmid 15194699] [evidence IPI]

protein binding [goid 5515] [pmid 11544179] [evidence IPI]; RNA binding [goid 3723] [evidence IEA]

binding [goid 5488] [evidence IEA]  
signal transducer activity [goid 4871] [pmid 8662509] [evidence NAS]  
Rab GTPase binding [goid 17137] [pmid 10859313] [evidence IPI]; Rab GTPase activator activity [goid 5097] [p  
binding [goid 5488] [evidence IEA]  
receptor activity [goid 4872] [evidence IEA]; IgA binding [goid 19862] [evidence IEA]; receptor signaling protein  
receptor activity [goid 4872] [evidence IEA]  
ATPase activity [goid 16887] [evidence ISS]; microtubule binding [goid 8017] [evidence ISS]; ATP binding [goid  
zinc ion binding [goid 8270] [evidence IEA]; metal ion binding [goid 46872] [evidence IEA]; protein binding [goid

zinc ion binding [goid 8270] [pmid 10608892] [evidence TAS]; metal ion binding [goid 46872] [evidence IEA]; p  
transcriptional activator activity [goid 16563] [pmid 10976108] [evidence TAS]; transcriptional repressor activity  
RNA binding [goid 3723] [pmid 9256445] [evidence TAS]; microtubule binding [goid 8017] [pmid 15851029] [e  
protein binding [goid 5515] [pmid 12606567] [evidence IDA]

zinc ion binding [goid 8270] [evidence IEA]; metal ion binding [goid 46872] [evidence IEA]; double-stranded RNA  
protein dimerization activity [goid 46983] [evidence IEA]; sequence-specific DNA binding [goid 43565] [evidence  
glucose transporter activity [goid 5355] [evidence IEA]; transporter activity [goid 5215] [evidence IEA]; sugar p  
transporter activity [goid 5215] [evidence IEA]

zinc ion binding [goid 8270] [pmid 11522286] [evidence TAS]; calcium ion binding [goid 5509] [pmid 7626002]  
kinase activity [goid 16301] [evidence IEA]

receptor activity [goid 4872] [pmid 1358805] [evidence TAS]; hematopoietin/interferon-class (D200-domain) c

RNA binding [goid 3723] [evidence IEA]; hydrolase activity [goid 16787] [evidence IEA]; nucleotide binding [goid

zinc ion binding [goid 8270] [evidence IEA]; metal ion binding [goid 46872] [evidence IEA]; protein binding [goid 5518] [evidence IEA]; kinase activity [goid 16301] [evidence IEA]

zinc ion binding [goid 8270] [evidence IEA]; metal ion binding [goid 46872] [evidence IEA]; transcription factor

transferase activity [goid 16740] [evidence IEA]; nucleotide binding [goid 166] [evidence IEA]; eukaryotic transmembrane structural constituent of ribosome [goid 3735] [evidence NAS]

tumor necrosis factor receptor binding [goid 5164] [evidence IEA]

protein kinase binding [goid 19901] [pmid 11034606] [evidence IPI]; signal transducer activity [goid 4871] [pmid 111111] [evidence IPI]; signal transducer activity [goid 4871] [evidence IEA]

tapasin binding [goid 46980] [pmid 12047747] [evidence IPI]; peptide antigen binding [goid 42605] [pmid 111111] [evidence IPI]

transcription factor activity [goid 3700] [evidence IEA]

threonine endopeptidase activity [goid 4298] [evidence IEA]; RNA binding [goid 3723] [pmid 7681138] [evidence IEA]; ion channel inhibitor activity [goid 8200] [pmid 9653196] [evidence TAS]; receptor binding [goid 5102] [pmid 9495343] [evidence TAS]

transcription factor activity [goid 3700] [evidence IEA]; protein heterodimerization activity [goid 46982] [pmid 111111] [evidence IPI]

receptor activity [goid 4872] [evidence IEA]; signal transducer activity [goid 4871] [pmid 9495343] [evidence TAS]; metalloproteinase activity [goid 8237] [pmid 2564851] [evidence TAS]; aminopeptidase activity [goid 4177] [pmid 111111] [evidence IPI]

transcriptional repressor activity [goid 16564] [pmid 10523670] [evidence TAS]; transcription factor binding [goid 5518] [evidence IEA]; zinc ion binding [goid 8270] [evidence IEA]; metal ion binding [goid 46872] [evidence IEA]; nucleic acid binding [goid 3676] [evidence IEA]; 5-oxo-6E,8Z,11Z,14Z-icosatetraenoic acid binding [goid 50646] [pmid 12065583] [evidence NAS]; receptor activity [goid 4872] [evidence IEA]; transferase activity [goid 16740] [evidence IEA]; nucleotide binding [goid 166] [evidence IEA]; ATP binding [goid 5518] [evidence IEA]; nucleotide binding [goid 166] [evidence IEA]; GTP binding [goid 5525] [evidence IEA]; protein binding [goid 5518] [evidence IEA]

mRNA binding [goid 3729] [evidence NAS]; nucleic acid binding [goid 3676] [evidence IEA]; nucleotide binding [goid 166] [evidence IEA]; structural constituent of cytoskeleton [goid 5200] [pmid 9230079] [evidence TAS]

DNA binding [goid 3677] [evidence IEA]

hydrolase activity [goid 16787] [evidence IEA]; magnesium ion binding [goid 287] [pmid 11795870] [evidence IPI]; structural constituent of ribosome [goid 3735] [evidence IEA]

hydrolase activity [goid 16787] [evidence IEA]; NAD<sup>+</sup> nucleosidase activity [goid 3953] [evidence IEA]; GPI anchor

chromatin binding [goid 3682] [pmid 9169582] [evidence TAS]; protein binding [goid 5515] [pmid 11242053] [

sugar binding [goid 5529] [pmid 10528209] [evidence TAS]

ATP binding [goid 5524] [evidence IEA]; transferase activity [goid 16740] [evidence IEA]; protein serine/threonine transferase activity [goid 16740] [evidence IEA]; Gram-positive bacterial binding [goid 51076] [pmid 11521063] binding [goid 5488] [evidence IEA]

ubiquitin protein ligase binding [goid 31625] [pmid 9859996] [evidence IPI]; NF-kappaB binding [goid 51059] [evidence IPI]; transferase activity [goid 16740] [evidence IEA]

transporter activity [goid 5215] [evidence IEA]

ligase activity [goid 16874] [evidence IEA]; ubiquitin-protein ligase activity [goid 4842] [evidence IEA]

actin binding [goid 3779] [evidence IEA]

hydrolase activity [goid 16787] [evidence IEA]

binding [goid 5488] [evidence IEA]; ATP binding [goid 5524] [evidence IEA]; transferase activity [goid 16740] [evidence IEA]; tapasin binding [goid 46980] [pmid 12047747] [evidence IPI]; peptide antigen binding [goid 42605] [pmid 11131113]

interleukin-1 receptor binding [goid 5149] [evidence IEA]; signal transducer activity [goid 4871] [pmid 8999896] clathrin binding [goid 30276] [pmid 10436022] [evidence IDA]; phospholipid binding [goid 5543] [evidence IEA] ATP binding [goid 5524] [evidence IEA]; chromatin binding [goid 3682] [evidence IEA]; DNA binding [goid 3677] calcium ion binding [goid 5509] [evidence IEA]; protein binding [goid 5515] [evidence IEA]

protein phosphatase type 1 activity [goid 163] [pmid 9414128] [evidence TAS]

receptor activity [goid 4872] [evidence IEA]; rhodopsin-like receptor activity [goid 1584] [evidence IEA]; interleukin-1 receptor activity [goid 5149] [evidence IEA]

zinc ion binding [goid 8270] [evidence IEA]; nucleic acid binding [goid 3676] [evidence IEA]

GTP binding [goid 5525] [evidence IEA]; structural molecule activity [goid 5198] [evidence IEA]; GTPase activity [goid 3924] [pmid 14645372] [evidence IDA]; zinc ion binding [goid 8270] [evidence IEA]; metal ion binding [goid 46872] [evidence IEA]; protein binding [goid 5515] [evidence IEA]

receptor activity [goid 4872] [evidence IEA]; G-protein coupled receptor activity, unknown ligand [goid 16526] [evidence IEA]

tropomyosin binding [goid 5523] [evidence IEA]

GTPase activity [goid 3924] [pmid 14645372] [evidence IDA]; GTP binding [goid 5525] [pmid 14645372] [evidence IDA]; growth factor activity [goid 8083] [evidence IEA]; insulin-like growth factor binding [goid 5520] [evidence IEA]

calmodulin binding [goid 5516] [evidence IEA]; structural constituent of cytoskeleton [goid 5200] [pmid 88938] protein binding [goid 5515] [pmid 12812986] [evidence IPI]

enzyme activator activity [goid 8047] [pmid 9079638] [evidence TAS]; growth factor activity [goid 8083] [evidence IEA]

DNA binding [goid 3677] [evidence IEA]

chromatin binding [goid 3682] [pmid 8663349] [evidence TAS]; protein binding [goid 5515] [pmid 15502821] [

transferase activity [goid 16740] [evidence IEA]; ubiquitin-protein ligase activity [goid 4842] [evidence ISS]; pro  
ATP binding [goid 5524] [evidence IEA]; hydrolase activity [goid 16787] [evidence IEA]; nucleotide binding [goid 166] [evidence IEA]; transcription regulator activity [goid 30528] [evidence IEA]; transcription factor activity [goid 3700] [pmid 109  
cell adhesion molecule binding [goid 50839] [evidence ISS]

oxidoreductase activity [goid 16491] [evidence IEA]; cytochrome-c oxidase activity [goid 4129] [pmid 8382530  
sequence-specific DNA binding [goid 43565] [evidence IEA]; transcription factor activity [goid 3700] [pmid 234

transferase activity [goid 16740] [evidence IEA]; protein-tyrosine kinase activity [goid 4713] [pmid 7970727] [e  
zinc ion binding [goid 8270] [pmid 2251898] [evidence TAS]; gelatinase B activity [goid 4229] [pmid 16192646]  
acyltransferase activity [goid 8415] [evidence IEA]; transferase activity [goid 16740] [evidence IEA]; calcium ion  
electron carrier activity [goid 9055] [pmid 1692159] [evidence TAS]; binding [goid 5488] [evidence IEA]; protei

transferase activity [goid 16740] [evidence IEA]; small GTPase regulator activity [goid 5083] [evidence IEA]; nu  
enzyme activator activity [goid 8047] [pmid 2300173] [evidence TAS]; binding [goid 5488] [pmid 2300173] [ev  
threonine endopeptidase activity [goid 4298] [evidence IEA]

DNA-dependent ATPase activity [goid 8094] [evidence IEA]; nucleoside-triphosphatase activity [goid 17111] [e  
transferase activity [goid 16740] [evidence IEA]; nucleotide binding [goid 166] [evidence IEA]; ATP binding [goid 5524] [evidence IEA]; cytokine activity [goid 5125] [evidence IEA]

ligase activity [goid 16874] [evidence IEA]; ubiquitin-protein ligase activity [goid 4842] [pmid 12853982] [evid

RNA binding [goid 3723] [pmid 9887331] [evidence TAS]; nucleotide binding [goid 166] [evidence IEA]

magnesium ion binding [goid 287] [pmid 15632002] [evidence TAS]; calcium ion binding [goid 5509] [pmid 166

\]

protein binding [goid 5515] [evidence IEA]; translation elongation factor activity [goid 3746] [evidence IEA]

DNA binding [goid 3677] [evidence IEA]; zinc ion binding [goid 8270] [evidence IEA]; metal ion binding [goid 46

transferase activity [goid 16740] [evidence IEA]; protein binding [goid 5515] [pmid 16169070] [evidence IPI]

pyridoxal phosphate binding [goid 30170] [pmid 15650327] [evidence IDA]; transferase activity [goid 16740] [e

hydrolase activity [goid 16787] [evidence IEA]; nucleotide binding [goid 166] [evidence IEA]; helicase activity [g

calcium-dependent phospholipid binding [goid 5544] [evidence IEA]; calcium ion binding [goid 5509] [evidence  
protein-arginine deiminase activity [goid 4668] [pmid 10488123] [evidence TAS]; hydrolase activity [goid 1678  
calcium ion binding [goid 5509] [evidence IEA]

zinc ion binding [goid 8270] [evidence IEA]; nucleic acid binding [goid 3676] [evidence IEA]

transcriptional repressor activity [goid 16564] [pmid 12724404] [evidence IDA]; transcription factor activity [g

transporter activity [goid 5215] [evidence IEA]

sequence-specific DNA binding [goid 43565] [evidence IEA]

1-phosphatidylinositol-4-phosphate 5-kinase activity [goid 16308] [evidence IEA]; kinase activity [goid 16301]  
GTP binding [goid 5525] [evidence IEA]; GTPase activity [goid 3924] [pmid 7811277] [evidence TAS]; nucleotid  
transcription factor activity [goid 3700] [pmid 11782478] [evidence IDA]; ligand-dependent nuclear receptor a  
zinc ion binding [goid 8270] [evidence IEA]; metal ion binding [goid 46872] [evidence IEA]

protein binding [goid 5515] [evidence IEA]

zinc ion binding [goid 8270] [evidence IEA]; metal ion binding [goid 46872] [evidence IEA]; hematopoietin/inte  
glutamate-ammonia ligase activity [goid 4356] [evidence IEA]; actin binding [goid 3779] [evidence IEA]; protei

receptor activity [goid 4872] [evidence IEA]; interleukin-9 receptor activity [goid 4919] [pmid 1376929] [eviden  
unfolded protein binding [goid 51082] [evidence IEA]; heat shock protein binding [goid 31072] [evidence IEA]  
DNA binding [goid 3677] [pmid 15888725] [evidence IDA]; zinc ion binding [goid 8270] [evidence IEA]; metal ic  
DNA binding [goid 3677] [pmid 10449920] [evidence NAS]





## Synonyms

Z32; mgU2-19/30

DDIT2; CR6; GADD45gamma; GRP17

MOAT-C; pABC11; ABC33; MRP5; SMRP; EST277145; DKFZp686C1782; MOATC  
; IEA]; signal transducer activity [goid 4871] [evidence IEA]  
bA810I22.1; RP11-810I22.1; FLJ11240; C6orf209

GLIPR2; GAPR-1

pp90RSK2; MAPKAPK1B; CLS; RSK2; RSK; S6K-alpha3; p90-RSK2; ISPK-1; MRX19; HU-3  
QRX; MGC15631; ARMD6; CORD11

DKFZP666B131; PBEF; 1110035O14Rik; NAMPT; MGC117256

UPA; URK; u-PA; ATF

PR72; PPP2R3; PR130

FLJ13456; ZYG11

SAR2; TSPAN27; GR15; ST6; KAI1; 4F9; C33; IA4; R2

RPB11; MGC71910; hRPB14; RPB11m; RPB11A; POLR2J1

FLJ46426

DLX2; DYX2; DYX2

RLPK; MSPK1; MGC1911; MSK1

EGFL5

H2a-615; H2A; H2AFO; HIST2H2AA; H2A/q; H2A/O; H2A.2  
TRP14; MGC14353

MPS-1; MPS1  
C1orf139; FLJ23091; WLS; MGC131760; MRP; MGC14878

CSF2R; CSF2RAY; CSF2RX; GM-CSF-R-alpha; CSF2RAX; CD116; MGC3848; CDw116; GMR; MGC4838; CSF2RY; G

RAMP; SCLL; MYM; FIM; ZNF198  
G5pr; FLJ20644; G4-1; C14orf10  
GPCR1; GPCR150  
CSTP1  
MGC119678; MGC119680  
NECAB2  
CACH6; BII; CACNL1A6; Cav2.3  
E3; PHE3; DLDH; GCSL; LAD  
HRG4

CGI-119; ZPRO; S1R  
SWIP1; WSB-1  
FLJ33845; KIAA1720  
MGC131982; KIAA0529; UNPH4; MGC149838; MGC74854

FTS; FT1  
DKFZP667O116; RNF109; FLJ35608  
C10orf7; D123  
NKX3A; BAPX2; NKX3; NKX3.1  
FLJ13055; DKFZp761E1121; PRG-4  
MGC126411; FLJ90554; KIAA1247; HSULF-2; DKFZp313E091  
PC4; TIS7

bA479K20.1; KIAA0625; Lmnt2; MGC21884; NTNG1; KIAA1857

FLJ13639  
HCP1; PDE7  
PYHIN3  
E2FBP1; BRIGHT; DRIL3; DRIL1  
MGC131732; FLJ33216

RP11-475E11.6; KIAA0761; MCLC  
MGC104792; TROB; APRO6; TROB1; PIG49; TOB; MGC34446  
FLJ22835; IFI75; VODI; IFI41  
MGC111419; LMN; LMNB; LMN2  
PAR2; GPR11

NRK1; bA235O14.2; RP11-235O14.2; FLJ20559  
DHRS8; PAN1B; RETSDR2

SIRP-BETA-1; CD172b; DKFZp686A05192  
CD119; IFNGR; FLJ45734

DKFZp547L163; FLJ20739  
KIAA0158; hNedd5; DIFF6; NEDD5  
CLEC6; MGC40078; CLECSF8; CLEC-6; MPCL; MCL

PHS-2; COX-2; hCox-2; COX2; PGHS-2; PGG/HS

MGC126681; NEP; CD10; MGC126707; DKFZp686O16152; CALLA  
BUP1  
TAFII68; TAF2N; RBP56; hTAFII68; Npl3  
BC200a; BC200  
DKFZp781P1719; C3G; GRF2  
FOAP-4; GPI-80  
MGC87867; PnSP-2; HIN1; HIN-1; UGRP2; LU105

MGC20741  
DKFZp686B1993; TRX; MGC61975  
PACPL1; ACPL1; LPAP

MGC3606; PKR2; PRKAR2  
cN-II; NT5B; PNT5; GMP  
E2(17)KB3; MGC43926; UBCH5C; MGC5416; UBC4/5  
G17; PBX2MHC; HOX12  
DKFZp781D2217; PFK-2/FBPase-2; MGC138308; MGC138310  
FLJ32028  
PROSIT240; FLJ21627; MED13L; KIAA1025; TRAP240L; DKFZp781D0112  
AC; FLJ22079; FLJ21558; PHP32; ASAH; PHP  
FACL2; LACS; FACL1; ACS1; LACS2; LACS1  
MGC22484; PSG14; PSG13  
KIAA1145  
DKFZp434I1020; FLJ45937; MGC119618  
TSP; THBS; TSP1  
OATP-M1; SLC21A20; OATPX; OATP4C1; OATP-H; PRO2176  
MEA5; FLJ23355; NCOAT; FLJ11229; KIAA0679  
HB24  
MGC126411; FLJ90554; KIAA1247; HSULF-2; DKFZp313E091  
FLJ11153  
IFI-6-16; 6-16; IFI616; G1P3; FAM14C

LL37; FALL39; CAP18; HSD26; FALL-39  
H2B/j; H2BFJ  
CD266; TWEAKR; FN14

FLJ46828; FAAP24; MGC32020  
DKFZp686F01145; DKFZp686G24132  
ISGF-3; STAT91; DKFZp686B04100

CD87; UPAR; URKR

IL4RA; CD124  
GIOT-4; KOX6  
de binding [goid 166] [evidence IEA]  
CKLFH; CKLFSF1; CKLFH1; MGC71870  
PLAP; ALP  
GADD45; DDIT1  
ICAp69; ICA69  
CLH22; CLTD; CHC22; CLTCL

FLJ36101; SFRSK2  
DKFZp686A20267

NEP; MGC126681; CD10; MGC126707; DKFZp686O16152; CALLA  
orylase activity [goid 4645] [evidence IEA]; glycogen phosphorylase activity [goid 8184] [pmid 9529348] [evidence IEA]  
ASP; FLJ25776  
BCE-1; ESG4; ESG; GRG4; E(spl)  
PheHB; FRSB

RNPL; IS1-RNPL

RNM561; IFI-56; IFI56; GARG-16; IFNAI1; G10P1

DFFRY; SP3; AZF; AZFA

BGR; DECTIN1; CLECSF12  
id 12670868] [evidence IPI]  
UTY1; DKFZp686L12190  
D3S1319E; PFL  
MGC104659; MAD; MAD1  
KAR  
Ht006; SF3B14a; SAP14; CGI-110; HSPC175; P14

MGC125447; MGC125448  
CKLiK; CaMKID; CaM-K1

PRKR; PKR; MGC126524; EIF2AK1  
MGC14978  
FLJ90675; GPP34; GOPP1  
RP11-3J10.8; hRrp40p; MGC15120; p10; Rrp40p; CGI-102; RRP40; MGC723; bA3J10.7

GOS8

MGC126867; GMF-GAMMA

UCK-1; CKLF1; CKLF4; CKLF2; CKLF3; C32; HSPC224  
FLJ20525

DHQV; DIA6; NMOR2; QR2  
FLJ14767; MAWDBP; FLJ35507; MAWBP  
PRA; CABP; 2A9; 5B10; CACY  
DKFZp7621137; MGC156120

MGC45871  
EZNF; TCF17; KID-1; HKL1; KID1  
CFAG; MAC387; 60B8AG; MIF; MRP14; CGLB; CAGB; NIF; LIAG; P14; L1AG

dJ331H24.1; FLJ21079; MGC102783  
CRBP4; MGC70641; CRBPIV

PVRR2; HVEB; PRR2; CD112  
DKFZp686M11215  
HSTD; histidase; HIS  
KIAA1001  
MGC2621; UBPO; KIAA0190

RP11-217H1.1; bA217H1.1; PRO0756; MGC64926; FLJ14726  
Exo84p; SEC84; EXO84  
TRIP2; PPARGBP; RB18A; MGC71488; MED1; CRSP200; TRAP220; CRSP1; PBP; DRIP205; DRIP230

LTBR1; P2Y7; CMKRL1; P2RY7; BLTR; BLT1; GPR16; LTB4R1  
HKII; HXK2; DKFZp686M1669

KIAA1079; cprk; AATYK2; KPI-2; BREK; KPI2; LMR2  
MGC133242; ERIC1; MGC117382  
MD-2

FLJ20696; FLJ10652  
FLJ16050  
KIAA1093  
MGC138429; 9130423L19Rik; KOX18; ZNF139; PHZ-37; ZNF36  
CD16b; FCG3; CD16; FCGR3  
CRE-BPA  
hIL-17R; IL-17RA; MGC10262; CDw217; IL17R  
PTPRP; ICAAR; IAR; IA-2beta  
G1RZFP; MGC138647; GOLIATH; MGC99542; MGC117241; GP

DA2B; AMCD2B; FSSV  
CFAG; 60B8AG; MRP8; CGLA; L1Ag; MIF; MA387; CAGA; CP-10; NIF; P8  
FR-gamma; gamma-hFR; FR-G  
NY-BR-1.1  
p35nck5a; CDK5P35; MGC33831; NCK5A; p23; p35; p25; CDK5R  
KIAA0012; DKFZp547I0610; TIL; CD281; MGC126312; MGC104956; rsc786; DKFZp564I0682; MGC126311

AGP2; AGP-B; AGP-B'  
KIAA0912

PPC2BETAX; MGC21657; PP2CB; PP2C-beta-X; PP2CBETA  
GBF; ZF9; ST12; CPBP; BCD1; PAC1; DKFZp686N0199; COPEB  
CYSLTR; MGC46139; HMTMF81; CYSLT1R; CYSLT1; HG55

FLJ23476; IRIP; FLJ26165; RP11-109P14.4; SUA5; DRIP3  
CPF3; CYP4F; LTB4H  
RPEL; MGC126577; KIAA1733; MGC126575; RPEL1; dJ257A7.2  
FLJ10883

FLJ10460; C15orf25; HsT17025

MGC20672; GM130

KIAA1408; MGC138835; HUPF2; DKFZP434D222; RENT2; MGC138834  
7SK  
UTY1; DKFZp686L12190  
MGC133042; MYPT1; MBS  
RAB3GAP; RAB3GAP130; P130; DKFZp434A012; KIAA0066; WARBM1  
FLJ14051; FLJ10008  
CD89  
MGC33613; PIGR3  
KIAA0591; HMSNII; CMT2; KIAA1448; CMT2A; MGC134844; KLP; FLJ23699; CMT2A1  
MGC142212; MGC142210; KIAA0244

MDMX; DKFZp781B1423; MRP1; MGC132766  
Epl1; DKFZp781P2312  
MIG14; MGC117333; dJ800J21.1; FLJ30608; MGC126076; Mnnp41; MRNP41; dJ481F12.3; MGC126077  
CASP; CYTIP; HE; CYBR; B3-1

Zfp346; JAZ; DKFZp547M223  
JUNDM2  
MGC118833; MGC118830; GLUT10; SLC2A11-a; SLC2A11-c; GLUT11  
MGC132523; SGLT4; MGC132517

CAAF1; CAGC; ENRAGE; p6; CGRP; MRP6  
RP3-503M14.1; MGC21854; CAPZIP; MGC126611; MK2S4; MGC126585

CSF2R; CSF2RAY; CSF2RX; GM-CSF-R-alpha; CSF2RAX; CD116; MGC3848; CDw116; GMR; MGC4838; CSF2RY; GSDHAL1

MGC2821; FLJ21167

KIAA0348; INPP5H; MGC44422  
SYN10; hsyn10  
RNF189; RNF34L  
COQ8; FLJ12229  
Z147; ZNF147; EFP; RNF147  
MGC70444; MGC21968  
RP3-422G23.1; KIAA1244; C6ORF34B; PP23; SOUL; C6orf34  
GCN2; KIAA1338  
MGC117346; rpL17; MGC111167; MGC72008

ZTNF4; TALL-1; THANK; TNFSF20; CD257; delta BAFF; TALL1; BLYS; BAFF  
GIG3; MORT1; MGC8528  
RGS13  
RING11; PSF2; APT2; ABC18; ABCB3; D6S217E  
MGC15827

PRG1; PPG; PRG; FLJ12930; MGC9289  
TBR2  
MGC22853; MGC14751; PROS30; HC2; MGC1667; MGC21459; MGC14542; MGC23915; NU; MGC14575  
MGC4319; MGC78563; MGC8394  
FLJ36756; FLJ13081  
HIF-1alpha; MOP1; PASD8; HIF1-ALPHA  
KAT3  
EVDB; D17S376  
AS]; insulin receptor binding [goid 5158] [evidence IEA]  
APN; gp150; CD13; LAP1; PEPN

HD4; HDAC-A; KIAA0288; HA6116; HDACA  
FLJ23765; FLJ31827  
GPR170; GPCR; TG1019  
MEKK2; MEKK2B  
RAP1; KREV-1; KREV1; SMGP21

S164; MGC105088; RNPC7; MGC117168  
ARC16; dJ127C7.3; p16-Arc

MGC27337; PN-I; PSN1; UMPH1; MGC87828; UMPH; MGC87109; cN-III; P5'N-1  
PP9932  
FLJ11795; MGC126014; MGC126013

CD157

M31; HP1Hs-beta; CBX; HP1-BETA; MOD1

FLJ40915

CLECSF9; MINCLE

HSPC164; SHUJUN-3; CDAO5

ine kinase activity [goid 4674] [pmid 9154127] [evidence TAS]; protein-tyrosine kinase activity [goid 4713] [evi

CD282; TIL4

CG7943; MGC14836

IKBA; NFKBI; MAD-3

NLRR-3; NLRR3; FLJ11129

TAT1; FLJ32714

DKFZp686M17164; NEDL2

TB4Y; MGC26307

RIPK7; ROCO2; PARK8; AURA17

APT2; RING11; PSF2; ABC18; ABCB3; D6S217E

MGC12320; IL-18; IL1F4; IGIF; IL-1g

LAP; CALM; CLTH

FLJ20361; KIAA1416; FLJ20357

CDw325; CDHN; NCAD

PPP1R6; DKFZp781L2441

ORP8; MGC126578; DKFZp686A11164; OSBP10; MGC133203

CD182; CMKAR2; IL8RA; IL8R2; CXCR2; CDw128b

FLJ21255; MGC5540; PP14212

BTNLR

MGC132756; MA3; MGC132758; MA5

TUBA1; H2-ALPHA; FLJ30169

BBAP

FLJ14629; FLJ34384; ORP9; FLJ14801; FLJ32055; MGC15035; FLJ12492

GPCR4; EX33

DKFZp313F0135

MGC126249; TGE; MGC126250

IGFBP9; NOVH; CCN3

ADDL

MGC78416; FLJ13386

GROa; GRO1; MGSA alpha; NAP-3; MGSA-a; MGSA; SCYB1

FLJ10583; WINS1

MGC74712; PAIP; LEDGF; p75; PSIP2; p52; DFS70



HP1-GAMMA; HP1Hs-gamma; HECH  
DKFZP434B044; MGC74865; CRISP11; LCRISP2

p63; CLIMP-63; MGC99554; ERGIC-63

Fbl13; FLJ38068; MGC21636  
TAF172; KIAA0940; TAF(II)170; TAFII170; MOT1; MGC138406  
TCFL4; MXD7; MAD7  
SDFR1; GP55; DKFZp686L2477; np65; np55; GP65; SDR1; MGC102805

] [evidence TAS]  
OCT1; OTF1

PSCTK2; PSCTK3; ETK  
MMP-9; GELB; CLG4B  
FLJ20481; LPCAT2; LysoPAFAT; DKFZp686H22112  
p67phox; NOXA2; P67-PHOX  
DKFZP434I143  
KIAA0687; FLJ90111; FLJ20373; HGK; NIK; FLJ10410; FLH21957  
FLAP  
MGC70470; LMP2; RING12  
MGC4816; C20orf154; MGC12866; MGC119523; dJ967N21.5; MGC119522  
SFRSK1  
MGC39436; CKLFSF2  
FLJ22390; RP11-295M18.1  
KIAA0161; MGC71786; p53RFP; bA528A10.3  
MGC22805  
BRUNOL3; ETR-3; NAPOR

MIG9  
PSG11  
C21orf107; FLJ43918; WDR9; N143  
BPOZ; PP2259; EF1ABP; MGC20585  
FLJ38932; PAT4  
FLJ12859; ZNP-99; ZBP-99; FLJ14378  
STRF2; FLJ12666; RP11-781D11.2  
C15orf1; PP32; PHAPI; MGC150373; PHAP1; I1PP2A; LANP; MAPM; MGC119787

NPD009; GABAT; GABA-AT

KIAA1564; DKFZp686N17164; HELSNF1

ANX11; CAP50  
PADI5; PDI4; PDI5; PAD  
PP791; RP4-765A10.3; KIAA1837; PKD1-like  
FLJ21082  
RBP1; RBP-1; RBBP1

SMCT; MGC125354; AIT  
FLJ22179; FLJ22155

Pip4k2B; PIP5KIIB  
RAB1C; H-ray; RAY  
ctivity [goid 4879] [pmid 10395741] [evidence IDA]; protein binding [goid 5515] [pmid 10395741] [evidence IP  
C20orf162  
MGC120306; FLJ25870; MGC120307; MGC120305  
FLJ22835; IFI75; VODI; IFI41  
WDR2; CLIPINB; IR10

CD129  
C21orf78  
MGC126276; LOT1; ZAC; MGC126275; ZAC1; DKFZp781P1017

WBSCR7



| <b>GB_ACC</b>  | <b>group</b> |
|----------------|--------------|
| XM_933516.1    | lncRNA       |
| XM_936105.1    | lncRNA       |
| XM_935575.1    | lncRNA       |
| XM_378454.3    | lncRNA       |
| XM_943677.1    | lncRNA       |
| XM_933693.2    | lncRNA       |
| XM_943048.1    | lncRNA       |
| XR_000601.1    | lncRNA       |
| XM_941963.1    | lncRNA       |
| XM_930545.1    | lncRNA       |
| XR_001261.1    | lncRNA       |
| XM_370932.4    | lncRNA       |
| NR_002569.1    | lncRNA       |
| AW450591       | lncRNA       |
| AK026751       | lncRNA       |
| XM_374029      | lncRNA       |
| AF452720       | lncRNA       |
| AK025793       | lncRNA       |
| CB852325       | lncRNA       |
| BI520375       | lncRNA       |
| XM_498474      | lncRNA       |
| BX103256       | lncRNA       |
| AK123264       | lncRNA       |
| NM_003329.1    | mRNA         |
| NM_001031.4    | mRNA         |
| NM_006705.2    | mRNA         |
| NM_001020.4    | mRNA         |
| NM_001023587.1 | mRNA         |
| NM_001017998.2 | mRNA         |
| NM_018368.2    | mRNA         |
| XM_936430.2    | mRNA         |
| NM_022343.2    | mRNA         |
| NM_004586.2    | mRNA         |
| NM_032753.2    | mRNA         |
| XM_372345.3    | mRNA         |
| NM_005746.2    | mRNA         |
| XM_929199.1    | mRNA         |
| NM_031925.1    | mRNA         |
| NM_002658.2    | mRNA         |
| NM_181897.1    | mRNA         |
| NM_024646.1    | mRNA         |
| NM_002231.3    | mRNA         |
| NM_006234.4    | mRNA         |
| NM_001004305.1 | mRNA         |
| NM_014809.2    | mRNA         |
| NM_004755.2    | mRNA         |
| NM_001080497.1 | mRNA         |

|                |      |
|----------------|------|
| XM_934218.2    | mRNA |
| XR_017611.1    | mRNA |
| NM_003516.2    | mRNA |
| NM_032731.2    | mRNA |
| XM_926814.1    | mRNA |
| XM_936511.1    | mRNA |
| NM_001030.3    | mRNA |
| NM_001002292.1 | mRNA |
| XM_934316.1    | mRNA |
| NM_172246.1    | mRNA |
| XM_941267.2    | mRNA |
| NM_003453.2    | mRNA |
| NM_017917.2    | mRNA |
| NM_014373.1    | mRNA |
| NM_018340.1    | mRNA |
| NM_153615.1    | mRNA |
| NM_019065.2    | mRNA |
| NM_000721.2    | mRNA |
| NM_000108.3    | mRNA |
| NM_005148.2    | mRNA |
| XM_497711.2    | mRNA |
| NM_016056.2    | mRNA |
| NM_015626.8    | mRNA |
| NM_030645.1    | mRNA |
| NM_006313.1    | mRNA |
| XM_372521.1    | mRNA |
| NM_022476.2    | mRNA |
| NM_030961.1    | mRNA |
| NM_006023.1    | mRNA |
| NM_006167.2    | mRNA |
| NM_022737.1    | mRNA |
| NM_198596.1    | mRNA |
| NM_001550.2    | mRNA |
| XM_001128769.1 | mRNA |
| NM_032536.1    | mRNA |
| XM_937277.1    | mRNA |
| NM_001031719.1 | mRNA |
| NM_002604.1    | mRNA |
| NM_002432.1    | mRNA |
| NM_005224.2    | mRNA |
| NM_001005852.1 | mRNA |
| NM_004882.3    | mRNA |
| NM_001048210.1 | mRNA |
| NM_005749.2    | mRNA |
| NM_004510.2    | mRNA |
| NM_005573.2    | mRNA |
| NM_005242.3    | mRNA |
| XM_942097.1    | mRNA |

NM\_017881.1 mRNA  
NM\_016245.2 mRNA  
NM\_001013725.1 mRNA  
NM\_006065.1 mRNA  
NM\_000416.1 mRNA  
XM\_934022.1 mRNA  
NM\_017949.1 mRNA  
NM\_001008491.1 mRNA  
NM\_080387.4 mRNA  
XR\_016005.1 mRNA  
NM\_000963.1 mRNA  
NM\_130781.2 mRNA  
NM\_007288.2 mRNA  
NM\_016327.2 mRNA  
NM\_139215.1 mRNA  
NR\_001568.1 mRNA  
NM\_198679.1 mRNA  
NM\_078488.1 mRNA  
NM\_052863.2 mRNA  
XM\_941155.2 mRNA  
NM\_018561.3 mRNA  
NM\_003329.2 mRNA  
NM\_016361.2 mRNA  
XM\_944417.1 mRNA  
NM\_004157.2 mRNA  
NM\_012229.2 mRNA  
NM\_181889.1 mRNA  
NM\_002586.4 mRNA  
NM\_006212.2 mRNA  
NM\_152680.1 mRNA  
NM\_015335.2 mRNA  
NM\_177924.2 mRNA  
NM\_001995.2 mRNA  
NM\_002785.2 mRNA  
NM\_020698.1 mRNA  
NR\_003260.1 mRNA  
NM\_003246.2 mRNA  
NM\_180991.4 mRNA  
NM\_012215.1 mRNA  
NM\_021958.2 mRNA  
NM\_018837.2 mRNA  
NM\_016090.2 mRNA  
NM\_002038.3 mRNA  
XM\_941155.2 mRNA  
XM\_944915.1 mRNA  
NM\_004345.3 mRNA  
NM\_003524.2 mRNA  
NM\_016639.1 mRNA

NM\_152266.1 mRNA  
NM\_001010915.1 mRNA  
NM\_139266.1 mRNA  
XM\_001134072.1 mRNA  
NM\_001005376.1 mRNA  
XM\_933375.1 mRNA  
NM\_001008699.1 mRNA  
NM\_021030.2 mRNA  
NM\_005881.1 mRNA  
NM\_181301.1 mRNA  
NM\_001632.3 mRNA  
NM\_001924.2 mRNA  
NM\_022308.1 mRNA  
NM\_007098.2 mRNA  
NM\_001032.3 mRNA  
XM\_928387.1 mRNA  
NM\_182692.1 mRNA  
NM\_020666.2 mRNA  
XR\_019071.1 mRNA  
NM\_000902.3 mRNA  
NM\_002863.3 mRNA  
NM\_031916.2 mRNA  
NM\_007005.3 mRNA  
NM\_005687.2 mRNA  
XM\_938906.2 mRNA  
NM\_001017431.1 mRNA  
XR\_017837.1 mRNA  
NM\_001548.2 mRNA  
XM\_935827.1 mRNA  
NM\_004654.3 mRNA  
XR\_018616.1 mRNA  
NM\_197953.1 mRNA  
NM\_003864.3 mRNA  
NM\_182659.1 mRNA  
NM\_053024.3 mRNA  
NM\_002357.2 mRNA  
NM\_016142.1 mRNA  
NM\_016047.3 mRNA  
XM\_937928.1 mRNA  
NM\_001033658.1 mRNA  
NM\_020397.2 mRNA  
XR\_017611.1 mRNA  
NM\_002759.1 mRNA  
NM\_018688.4 mRNA  
NM\_022130.3 mRNA  
NM\_001002269.1 mRNA  
NM\_001012391.1 mRNA  
XM\_942939.1 mRNA

XM\_927706.2 mRNA  
NM\_002923.1 mRNA  
XM\_934113.1 mRNA  
XM\_928866.1 mRNA  
NM\_004877.1 mRNA  
XM\_928047.1 mRNA  
NM\_016326.2 mRNA  
NR\_002949.1 mRNA  
XM\_927767.2 mRNA  
NM\_000904.1 mRNA  
NM\_022129.3 mRNA  
NM\_014624.3 mRNA  
NM\_152411.1 mRNA  
XM\_001126665.1 mRNA  
NM\_182705.2 mRNA  
NM\_005649.2 mRNA  
NM\_002965.3 mRNA  
XM\_498571.2 mRNA  
NM\_024576.3 mRNA  
NM\_052960.1 mRNA  
NM\_001039473.1 mRNA  
NM\_002856.2 mRNA  
NM\_144726.1 mRNA  
NM\_002108.2 mRNA  
NM\_014960.2 mRNA  
NM\_005153.2 mRNA  
XM\_942501.1 mRNA  
NM\_032121.3 mRNA  
NM\_175876.3 mRNA  
NM\_004774.2 mRNA  
XM\_001132265.1 mRNA  
XM\_001127825.1 mRNA  
NM\_181657.1 mRNA  
NM\_000189.4 mRNA  
NM\_001011538.1 mRNA  
NM\_014916.2 mRNA  
NM\_006342.1 mRNA  
NM\_015364.2 mRNA  
NM\_004048.2 mRNA  
NM\_018169.2 mRNA  
NM\_173497.1 mRNA  
NM\_001024843.1 mRNA  
NM\_003439.1 mRNA  
NM\_000570.2 mRNA  
NM\_001011666.1 mRNA  
NM\_014339.4 mRNA  
NM\_130843.1 mRNA  
NM\_018434.4 mRNA



NM\_003282.2 mRNA  
NM\_002964.3 mRNA  
NM\_000804.2 mRNA  
NM\_001029862.1 mRNA  
NM\_003885.2 mRNA  
NM\_003263.3 mRNA  
NM\_020954.2 mRNA  
NM\_000987.3 mRNA  
NM\_000608.2 mRNA  
NM\_014985.1 mRNA  
XM\_933119.1 mRNA  
NM\_001033556.1 mRNA  
NM\_001300.4 mRNA  
NM\_006639.2 mRNA  
XM\_927280.1 mRNA  
NM\_024640.3 mRNA  
NM\_000896.1 mRNA  
NM\_030948.1 mRNA  
NM\_052937.1 mRNA  
NM\_173669.1 mRNA  
NM\_001032.3 mRNA  
NM\_018097.1 mRNA  
XM\_928041.1 mRNA  
NM\_004486.4 mRNA  
XM\_928180.1 mRNA  
NM\_015542.2 mRNA  
NR\_001445.1 mRNA  
NM\_007125.3 mRNA  
NM\_002480.1 mRNA  
NM\_012233.1 mRNA  
NM\_017970.2 mRNA  
NM\_133279.1 mRNA  
NM\_130771.2 mRNA  
NM\_183416.2 mRNA  
NM\_015153.1 mRNA  
XM\_935802.1 mRNA  
NM\_002393.2 mRNA  
NM\_025209.2 mRNA  
NM\_003610.3 mRNA  
NM\_004288.3 mRNA  
XM\_931879.1 mRNA  
NM\_012279.2 mRNA  
NM\_130469.2 mRNA  
NM\_001024938.1 mRNA  
NM\_001011547.1 mRNA  
XM\_001128558.1 mRNA  
NM\_005621.1 mRNA  
NM\_052862.2 mRNA

NM\_172246.1 mRNA  
NR\_003264.1 mRNA  
NM\_207337.1 mRNA  
NM\_023003.1 mRNA  
NM\_024054.1 mRNA  
XM\_371820.5 mRNA  
NM\_003898.2 mRNA  
NM\_003765.1 mRNA  
NM\_001017368.1 mRNA  
NM\_024876.2 mRNA  
NM\_005082.4 mRNA  
NM\_153697.1 mRNA  
NM\_014320.2 mRNA  
NM\_001013703.2 mRNA  
NM\_000978.3 mRNA  
NM\_032576.2 mRNA  
XM\_936748.1 mRNA  
NM\_006573.3 mRNA  
NM\_003824.2 mRNA  
NM\_130782.2 mRNA  
NM\_018833.2 mRNA  
NM\_032882.2 mRNA  
XM\_928156.1 mRNA  
NM\_002727.2 mRNA  
NM\_005442.2 mRNA  
NM\_148976.1 mRNA  
NM\_207168.1 mRNA  
NM\_024834.1 mRNA  
NM\_001530.2 mRNA  
NM\_019610.3 mRNA  
NM\_006495.2 mRNA  
NM\_003749.2 mRNA  
NM\_001150.1 mRNA  
XM\_001131044.1 mRNA  
NM\_006037.2 mRNA  
NM\_152655.2 mRNA  
NM\_148962.4 mRNA  
NM\_006609.3 mRNA  
NM\_001010935.1 mRNA  
NM\_004125.2 mRNA  
NM\_021239.1 mRNA  
NM\_005717.2 mRNA  
NM\_001013699.1 mRNA  
NM\_001002009.1 mRNA  
NM\_001007074.1 mRNA  
NM\_024669.2 mRNA  
XM\_942212.2 mRNA  
NM\_004334.1 mRNA

NM\_006807.3 mRNA  
XM\_935752.1 mRNA  
XM\_926814.1 mRNA  
NM\_001004322.1 mRNA  
NM\_014358.2 mRNA  
NM\_016407.1 mRNA  
NM\_002760.3 mRNA  
NM\_003264.3 mRNA  
NM\_033412.1 mRNA  
NM\_020529.1 mRNA  
NM\_018334.3 mRNA  
NM\_052961.2 mRNA  
NM\_020760.1 mRNA  
NM\_004202.2 mRNA  
XM\_934651.1 mRNA  
NM\_023075.4 mRNA  
NM\_198578.2 mRNA  
NM\_000544.3 mRNA  
XM\_942096.1 mRNA  
NM\_001562.2 mRNA  
NM\_007166.2 mRNA  
NM\_017780.2 mRNA  
NM\_001792.2 mRNA  
XM\_935186.1 mRNA  
XM\_930480.1 mRNA  
NM\_006242.3 mRNA  
NM\_001003712.1 mRNA  
XM\_001133926.1 mRNA  
NM\_001557.2 mRNA  
NM\_024095.3 mRNA  
NM\_006707.2 mRNA  
NM\_013364.3 mRNA  
NM\_006000.1 mRNA  
NM\_138287.2 mRNA  
XM\_936461.1 mRNA  
NM\_024586.3 mRNA  
NM\_020370.1 mRNA  
NR\_002189.2 mRNA  
NM\_198271.2 mRNA  
NM\_003245.2 mRNA  
NM\_002514.2 mRNA  
NM\_178231.1 mRNA  
NM\_016824.3 mRNA  
NM\_025180.3 mRNA  
NM\_001511.1 mRNA  
NM\_001040616.1 mRNA  
NM\_001013722.1 mRNA  
NM\_033222.2 mRNA

NM\_016587.2 mRNA  
NM\_031476.1 mRNA  
XM\_931214.1 mRNA  
NM\_006825.2 mRNA  
NM\_001007535.1 mRNA  
NM\_145032.2 mRNA  
NM\_003972.2 mRNA  
NM\_170607.2 mRNA  
NM\_012428.2 mRNA  
XM\_497711.2 mRNA  
NM\_001866.2 mRNA  
NM\_002697.2 mRNA  
XM\_001134256.1 mRNA  
NM\_001721.4 mRNA  
NM\_004994.2 mRNA  
NM\_017839.3 mRNA  
NM\_000433.2 mRNA  
NR\_001545.1 mRNA  
NM\_145686.2 mRNA  
NM\_001629.2 mRNA  
NM\_148954.2 mRNA  
NM\_182802.1 mRNA  
NM\_003137.3 mRNA  
NM\_144673.2 mRNA  
NM\_022746.2 mRNA  
NM\_182757.2 mRNA  
NM\_144590.1 mRNA  
NM\_001025077.1 mRNA  
XM\_938919.1 mRNA  
NM\_005980.2 mRNA  
NM\_002784.2 mRNA  
NM\_033656.2 mRNA  
NM\_172027.1 mRNA  
NM\_152313.2 mRNA  
NM\_012482.3 mRNA  
NM\_024595.1 mRNA  
NM\_006305.2 mRNA  
XM\_939954.2 mRNA  
NM\_020686.4 mRNA  
XM\_371152.3 mRNA  
NM\_020920.2 mRNA  
XM\_944290.2 mRNA  
NM\_030578.2 mRNA  
NM\_145869.1 mRNA  
NM\_012387.1 mRNA  
NM\_182686.1 mRNA  
NM\_198795.1 mRNA  
NM\_023001.2 mRNA

|                |      |
|----------------|------|
| NM_145913.2    | mRNA |
| NM_019000.3    | mRNA |
| XR_017962.1    | mRNA |
| NM_030636.2    | mRNA |
| NM_138687.1    | mRNA |
| NM_006861.4    | mRNA |
| NM_001621.2    | mRNA |
| NM_080603.3    | mRNA |
| NM_182703.3    | mRNA |
| NM_080424.1    | mRNA |
| NM_003389.2    | mRNA |
| XM_930995.1    | mRNA |
| NM_002186.2    | mRNA |
| NM_017833.2    | mRNA |
| NM_001080951.1 | mRNA |
| NM_013361.2    | mRNA |
| NR_002206.1    | mRNA |
| CR738550       | mRNA |
| AK097979       | mRNA |
| AK055497       | mRNA |
| AI655567       | mRNA |
| AA417811       | mRNA |
| BX108917       | mRNA |
| BI026144       | mRNA |
| BU151653       | mRNA |
| DA385619       | mRNA |
| DA572426       | mRNA |
| BQ777029       | mRNA |
| AL832858       | mRNA |
| BC062546       | mRNA |
| BU587445       | mRNA |
| BX113731       | mRNA |
| BM723547       | mRNA |
| CR746297       | mRNA |
| AV645572       | mRNA |
| AW020492       | mRNA |
| AK124771       | mRNA |
| BQ439091       | mRNA |
| BM703133       | mRNA |
| BX111927       | mRNA |
| BQ709709       | mRNA |
| AA179392       | mRNA |
| BM997836       | mRNA |
| CB963631       | mRNA |
| BQ948854       | mRNA |
| BC045657       | mRNA |
| BQ025535       | mRNA |
| BM716528       | mRNA |

|             |      |
|-------------|------|
| BX099079    | mRNA |
| AW273831    | mRNA |
| BU857004    | mRNA |
| AI738931    | mRNA |
| BC037864    | mRNA |
| BX109404    | mRNA |
| BF945346    | mRNA |
| BX100504    | mRNA |
| DA395916    | mRNA |
| AJ227862    | mRNA |
| AA744250    | mRNA |
| AK129555    | mRNA |
| AL832727    | mRNA |
| CA396207    | mRNA |
| BM668860    | mRNA |
| BX092006    | mRNA |
| BI492679    | mRNA |
| CD238045    | mRNA |
| AV651069    | mRNA |
| AI678043    | mRNA |
| BI915787    | mRNA |
| BX117171    | mRNA |
| AA938457    | mRNA |
| N35069      | mRNA |
| AI948831    | mRNA |
| BE220308    | mRNA |
| AK055485    | mRNA |
| AL049390    | mRNA |
| BE148741    | mRNA |
| AL359560    | mRNA |
| AA134590    | mRNA |
| AK094521    | mRNA |
| AK124299    | mRNA |
| AK025332    | mRNA |
| DR977977    | mRNA |
| BX538075    | mRNA |
| BI836710    | mRNA |
| AA204695    | mRNA |
| CD642055    | mRNA |
| AV705309    | mRNA |
| BE796139    | mRNA |
| BX111162    | mRNA |
| NM_003329.1 | mRNA |
