# Supplementary material for: The ceRNA Crosstalk between mRNAs and lncRNAs in Diabetes Myocardial Infarction
Source: Hindawi journal article supplement (doi:10.1155/2022/4283534), 2022-05-09
Supplement: f2 [file 4283534.f2.pdf]

| <b>ID_REF</b> | <b>SAMPLE 1</b> | <b>SAMPLE 2</b> | <b>SAMPLE 3</b> | <b>SAMPLE 4</b> | <b>SAMPLE 5</b> | <b>SAMPLE 6</b> | <b>SAMPLE 8</b> | <b>SAMPLE 10</b> |
|---------------|-----------------|-----------------|-----------------|-----------------|-----------------|-----------------|-----------------|------------------|
| hsa_miR_4NA   | NA              | NA              | NA              | 21.62745        | NA              | NA              | 20.406          |                  |
| hsa_miR_1NA   | NA              | NA              | NA              | NA              | NA              | 20.97495        | NA              |                  |
| has_miR_4NA   | 19.16549        | 17.41167        | 20.10947        | 16.74546        | 17.81623        | 20.37218        | 15.93473        |                  |
| hsa_miR_2     | 16.81364        | 13.10882        | 11.90237        | 14.34934        | 11.71852        | 12.48067        | 17.05926        | 11.2793          |

**SAMPLE 1: SAMPLE 1:**  
20.29419 21.96203 20.89518 21.45361 NA NA NA 20.3908 NA  
20.544 NA NA NA NA NA NA NA NA  
16.16858 18.8438 16.3159 20.0424 NA 21.54157 17.79583 16.75162 18.29313  
11.85411 12.71857 11.61339 11.34513 14.32036 18.04019 13.36034 11.22205 13.73786

| SAMPLE 2 | SAMPLE 2 | SAMPLE 2 | SAMPLE 2 | SAMPLE 2 | SAMPLE 2 | SAMPLE 2 | SAMPLE 2 | SAMPLE 3 |
|----------|----------|----------|----------|----------|----------|----------|----------|----------|
| 21.56171 | NA       | NA       | NA       | NA       | NA       | 21.08756 | NA       | NA       |
| NA       | NA       | NA       | NA       | NA       | NA       | 21.36362 | NA       | NA       |
| 15.23375 | 18.71181 | 19.88769 | NA       | 21.80207 | 20.71982 | 15.99602 | 19.2381  | NA       |
| 10.50383 | 13.69927 | 13.94763 | 16.33523 | 15.15049 | 13.64122 | 11.81833 | 12.96049 | 15.284   |

| SAMPLE 3 | SAMPLE 3 | SAMPLE 3 | SAMPLE 3 | SAMPLE 3 | SAMPLE 4 | SAMPLE 4 | SAMPLE 4 | SAMPLE 4 |
|----------|----------|----------|----------|----------|----------|----------|----------|----------|
| NA       | 21.26031 | NA       | NA       | NA       | NA       | NA       | NA       | NA       |
| NA       | NA       | NA       | NA       | NA       | NA       | NA       | NA       | NA       |
| 18.96003 | 17.47397 | NA       | NA       | NA       | NA       | 21.68303 | NA       | 21.03388 |
| 13.67284 | 12.67481 | 13.98653 | 15.16492 | 15.79735 | 18.96092 | 14.41464 | 17.53115 | 14.21527 |

| SAMPLE 4 | SAMPLE 4 | SAMPLE 4 | SAMPLE 5 | SAMPLE 5 | SAMPLE 5 | SAMPLE 5 | SAMPLE 5 | SAMPLE 5 |
|----------|----------|----------|----------|----------|----------|----------|----------|----------|
| NA       | 21.74166 | 20.58315 | 20.95206 | NA       | 20.62812 | NA       | NA       | NA       |
| NA       | NA       | NA       | NA       | NA       | NA       | NA       | NA       | NA       |
| NA       | NA       | 17.36558 | 17.55988 | NA       | 17.69982 | 18.98096 | 17.71117 | NA       |
| 16.07021 | 13.58342 | 11.48253 | 13.09753 | 15.33193 | 13.40838 | 15.0089  | 13.13871 | 15.19101 |

| SAMPLE 5 | SAMPLE 5 | SAMPLE 5 | SAMPLE 6 | SAMPLE 6 | SAMPLE 6 | SAMPLE 6 | SAMPLE 6 | SAMPLE 6 |
|----------|----------|----------|----------|----------|----------|----------|----------|----------|
| NA       | NA       | 20.58877 | 21.88975 | NA       | NA       | NA       | NA       | NA       |
| NA       | NA       | NA       | NA       | NA       | NA       | NA       | NA       | NA       |
| NA       | 17.97505 | 17.98546 | 18.0872  | 18.04114 | 18.61819 | 17.8926  | NA       | 17.96698 |
| 14.14163 | 15.41161 | 13.12914 | 13.40109 | 12.90966 | 15.7957  | 15.36431 | 15.05674 | 16.67234 |

**SAMPLE 6!SAMPLE 6!SAMPLE 7(SAMPLE 7: SAMPLE 7: SAMPLE 7: SAMPLE 7: SAMPLE 7!SAMPLE 7!**  
21.92042 NA 20.6819 20.1233 NA NA 20.50163 19.57306 NA  
NA NA NA NA NA NA 20.02025 NA NA  
16.78176 19.25429 17.38595 16.44638 NA 17.00555 18.07298 14.01767 NA  
14.23855 13.44627 12.19542 11.89305 16.71513 12.25064 13.87401 10.10492 13.53198

| SAMPLE 7 | SAMPLE 8 | SAMPLE 8 | SAMPLE 8 | SAMPLE 8 | SAMPLE 8 | SAMPLE 9 | SAMPLE 9 | SAMPLE 9 |
|----------|----------|----------|----------|----------|----------|----------|----------|----------|
| 20.47586 | NA       | NA       | NA       | NA       | NA       | NA       | NA       | NA       |
| 20.18259 | NA       | NA       | NA       | 18.23661 | NA       | NA       | NA       | NA       |
| 16.3524  | 17.68951 | NA       | 18.59093 | NA       | 17.56083 | NA       | 20.67471 | NA       |
| 13.3776  | 13.46086 | 16.31019 | 13.1323  | 16.03175 | 14.45111 | 17.77344 | 14.52784 | 15.36013 |

| SAMPLE 9 | SAMPLE 9 | SAMPLE 1 | SAMPLE 1 | SAMPLE 1 | SAMPLE 1 | SAMPLE 1 | SAMPLE 1 | SAMPLE 1 |
|----------|----------|----------|----------|----------|----------|----------|----------|----------|
| NA       | NA       | NA       | NA       | NA       | NA       | NA       | NA       | NA       |
| NA       | NA       | NA       | 20.33971 | NA       | 21.93474 | NA       | NA       | NA       |
| 16.6826  | 14.82194 | 16.89285 | 18.12342 | 16.9251  | 21.91382 | NA       | NA       | NA       |
| 13.32138 | 11.8448  | 13.98723 | 14.74712 | 14.58109 | 15.26902 | 15.11772 | 17.24201 | 14.18921 |

**SAMPLE 1(SAMPLE 1: SAMPLE 1:**  
NA NA NA NA NA 21.96414 NA 19.41391 21.64185  
NA NA NA NA NA NA NA 21.35592 NA  
NA 20.45711 21.72979 20.51366 16.46058 18.81439 NA 14.27734 17.26818  
16.82357 14.52656 14.84342 13.85347 13.91408 13.24796 14.08902 10.68021 13.9771

| SAMPLE 1: | SAMPLE 1: | SAMPLE 1: | SAMPLE 1: | SAMPLE 1: | SAMPLE 1: | SAMPLE 1: | SAMPLE 1: | SAMPLE 1: |
|-----------|-----------|-----------|-----------|-----------|-----------|-----------|-----------|-----------|
| 21.44055  | NA        | NA        | NA        | NA        | 21.19941  | NA        | 21.76696  | 21.73044  |
| NA        | NA        | NA        | NA        | NA        | NA        | 21.20835  | NA        | 20.99379  |
| 19.65211  | 19.49167  | 21.77454  | 21.80458  | 16.88467  | 17.53101  | 20.71889  | 17.09956  | 15.63982  |
| 13.74509  | 12.96578  | 13.56867  | 14.74801  | 13.84309  | 14.93915  | 13.36239  | 15.16127  | 13.58738  |

**SAMPLE 1: SAMPLE 1:**

|          |          |          |          |          |          |          |          |          |
|----------|----------|----------|----------|----------|----------|----------|----------|----------|
| NA       | NA       | 18.75858 | NA       | NA       | 20.05868 | NA       | 21.67958 | NA       |
| NA       | NA       | NA       | NA       | NA       | 20.7143  | NA       | NA       | NA       |
| NA       | 18.03415 | 13.99636 | 21.44189 | 20.81748 | 14.05425 | 17.88789 | 19.49763 | 17.30812 |
| 16.30249 | 12.82618 | 11.39555 | 15.39625 | 12.03556 | 11.55661 | 13.87722 | 15.89872 | 14.2878  |

| SAMPLE 1 | SAMPLE 1 | SAMPLE 1 | SAMPLE 1 | SAMPLE 1 | SAMPLE 1 | SAMPLE 1 | SAMPLE 1 | SAMPLE 1 |
|----------|----------|----------|----------|----------|----------|----------|----------|----------|
| NA       | NA       | NA       | NA       | 20.91265 | 21.29975 | 21.13332 | 21.26715 | 20.79721 |
| NA       | 20.89118 | NA       | NA       | NA       | NA       | 20.10978 | NA       | NA       |
| 17.18863 | 21.20353 | 17.18488 | 18.50231 | 17.81123 | 20.41376 | 16.53959 | 16.52726 | 16.13661 |
| 14.24856 | 18.48671 | 14.22579 | 15.08355 | 12.97093 | 13.08764 | 13.92992 | 14.28499 | 11.91837 |

| SAMPLE 1! | SAMPLE 1! | SAMPLE 1! | SAMPLE 1! | SAMPLE 1! | SAMPLE 1! | SAMPLE 1! | SAMPLE 1! | SAMPLE 1! |
|-----------|-----------|-----------|-----------|-----------|-----------|-----------|-----------|-----------|
| 20.96716  | NA        | NA        | NA        | 20.77473  | 21.32041  | 20.12199  | NA        | NA        |
| 21.94265  | NA        | NA        | NA        | NA        | NA        | NA        | NA        | NA        |
| 14.55633  | 20.81772  | 16.85436  | 19.70076  | 16.36382  | 15.30881  | 15.13215  | 18.14382  | NA        |
| 12.58571  | 19.37189  | 14.50096  | 14.56045  | 13.66929  | 13.35751  | 10.17002  | 15.38849  | 15.61381  |

| SAMPLE 1 | SAMPLE 1 | SAMPLE 1 | SAMPLE 1 | SAMPLE 1 | SAMPLE 1 | SAMPLE 1 | SAMPLE 1 | SAMPLE 1 |
|----------|----------|----------|----------|----------|----------|----------|----------|----------|
| NA       | NA       | 21.15064 | 21.02233 | NA       | NA       | NA       | NA       | 20.62815 |
| NA       | NA       | 20.74042 | 20.82096 | NA       | NA       | 21.34257 | NA       | 19.63841 |
| 16.86831 | 15.70126 | 17.88591 | 18.00043 | 18.44175 | 19.3339  | 15.59754 | 16.23037 | 17.03492 |
| 14.79523 | 13.24724 | 15.46203 | 15.15635 | 16.62277 | 16.86335 | 13.274   | 13.79494 | 13.9755  |

| SAMPLE 1 | SAMPLE 1 | SAMPLE 1 | SAMPLE 1 | SAMPLE 1 | SAMPLE 1 | SAMPLE 1 | SAMPLE 1 | SAMPLE 1 |
|----------|----------|----------|----------|----------|----------|----------|----------|----------|
| NA       | NA       | NA       | 21.21394 | NA       | 20.82938 | NA       | 21.87908 | NA       |
| NA       | NA       | NA       | NA       | NA       | 20.6948  | NA       | NA       | NA       |
| 17.29367 | 18.47523 | 18.0807  | 15.89682 | 16.60466 | 13.67533 | 17.2972  | 15.35072 | 15.78499 |
| 15.24057 | 16.71346 | 15.0079  | 13.68185 | 14.10929 | 12.84209 | 14.56748 | 13.45011 | 13.47698 |

| SAMPLE 1! | SAMPLE 1! | SAMPLE 1! | SAMPLE 1! | SAMPLE 1! | SAMPLE 2! | SAMPLE 2! | SAMPLE 2! | SAMPLE 2! |
|-----------|-----------|-----------|-----------|-----------|-----------|-----------|-----------|-----------|
| 21.96268  | 20.80346  | NA        | 20.2044   | 20.64566  | 21.37221  | 20.30755  | 20.17305  | 18.28001  |
| NA        | NA        | NA        | NA        | NA        | NA        | NA        | 18.36373  | NA        |
| 15.49249  | 15.174    | 21.33861  | 13.95377  | 14.59416  | 16.30797  | 15.70609  | 12.55045  | 10.81389  |
| 13.19008  | 12.7462   | 15.52364  | 9.600353  | 10.45049  | 11.84986  | 12.26637  | 8.756581  | 7.442652  |

**SAMPLE 2(SAMPLE 2(SAMPLE 2(SAMPLE 2: SAMPLE 2: SAMPLE 2: SAMPLE 2: SAMPLE 2: SAMPLE 2:**  
18.50962 20.71176 NA NA NA 19.94498 20.99469 21.38967 NA  
NA NA NA 21.93916 20.08058 NA NA NA NA  
13.67875 16.36766 16.07376 16.26382 13.49633 12.30974 16.33088 15.30716 18.1714  
9.411159 11.6916 21.21671 13.2395 9.840706 7.991071 10.2879 10.98439 13.68931

**SAMPLE 2: SAMPLE 2:**  
20.51869 NA NA NA 19.81456 NA 19.96708 NA 20.26612  
NA NA NA NA NA NA NA NA 20.88049  
14.36578 16.76523 17.33531 19.1631 14.60532 17.60303 15.25933 18.02448 14.45143  
9.888546 12.0046 17.3858 11.57889 10.06102 12.6806 11.10099 14.0717 10.62198

**SAMPLE 2: SAMPLE 2:**  
NA 21.73313 21.60738 NA 19.13526 21.835 19.80324 21.63244 NA  
NA NA NA NA 19.74013 NA NA NA NA  
17.08157 17.14688 15.15934 15.68441 13.68039 NA 14.25198 14.51287 16.65426  
13.28624 11.9058 10.20979 11.68961 9.003936 NA 10.10305 9.859328 11.91448

**SAMPLE 2!SAMPLE 2!SAMPLE 2!SAMPLE 2!SAMPLE 2!SAMPLE 2!SAMPLE 2!SAMPLE 2!SAMPLE 2!**  
20.18324 20.1475 20.08083 20.26743 NA 20.80734 21.09156 21.46212 20.91675  
NA 21.82897 21.23804 NA NA NA NA NA NA  
15.28535 13.54616 12.90246 14.20774 15.01573 15.78545 16.17662 15.84891 13.64065  
10.78376 8.753276 8.686641 9.953928 10.70958 11.05958 11.46495 11.72325 9.980806

| SAMPLE 2! | SAMPLE 2! | SAMPLE 2! | SAMPLE 2! | SAMPLE 2! | SAMPLE 2! | SAMPLE 2! | SAMPLE 2! | SAMPLE 2! |
|-----------|-----------|-----------|-----------|-----------|-----------|-----------|-----------|-----------|
| NA        | 20.18937  | NA        | NA        | NA        | NA        | 20.11712  | NA        | NA        |
| NA        | 20.59467  | NA        | NA        | NA        | NA        | NA        | NA        | NA        |
| NA        | 13.47983  | 16.46057  | 16.68778  | 17.22944  | 20.0809   | 16.91954  | 17.13248  | 17.43274  |
| NA        | 8.376382  | 13.62229  | 14.12098  | 14.88317  | 15.05257  | 12.46899  | 14.25466  | 15.26372  |

| SAMPLE 2 | SAMPLE 2 | SAMPLE 2 | SAMPLE 2 | SAMPLE 2 | SAMPLE 2 | SAMPLE 2 | SAMPLE 2 | SAMPLE 2 |
|----------|----------|----------|----------|----------|----------|----------|----------|----------|
| NA       | NA       | NA       | 20.96855 | NA       | 21.66573 | NA       | NA       | NA       |
| NA       | NA       | NA       | NA       | NA       | NA       | 21.13467 | NA       | NA       |
| 20.85868 | 18.00166 | 19.96289 | 16.88032 | 17.59733 | 18.06307 | 19.90491 | 16.74231 | 17.98772 |
| 17.58681 | 15.48247 | 16.43837 | 14.38442 | 14.78858 | 13.79603 | 12.36328 | 13.57614 | 14.43741 |

| SAMPLE 2! | SAMPLE 2! | SAMPLE 2! | SAMPLE 2! | SAMPLE 2! | SAMPLE 2! | SAMPLE 2! | SAMPLE 2! | SAMPLE 2! |
|-----------|-----------|-----------|-----------|-----------|-----------|-----------|-----------|-----------|
| 20.98865  | NA        | 18.55834  | 17.72918  | 20.59811  | 20.77282  | NA        | NA        | NA        |
| NA        | NA        | 21.22695  | 20.43866  | NA        | NA        | NA        | NA        | NA        |
| 16.53303  | 17.48876  | 14.47127  | 11.83317  | 16.68231  | 16.81049  | 16.7735   | 18.52258  | 17.46614  |
| 13.08297  | 14.15683  | 11.11266  | 10.01415  | 13.37679  | 12.83976  | 13.18258  | 14.57972  | 13.80326  |

| SAMPLE 2! | SAMPLE 2! | SAMPLE 2! | SAMPLE 2! | SAMPLE 2! | SAMPLE 2! | SAMPLE 3! | SAMPLE 3! | SAMPLE 3! |
|-----------|-----------|-----------|-----------|-----------|-----------|-----------|-----------|-----------|
| NA        | 19.86701  | NA        | NA        | 20.89383  | NA        | NA        | NA        | NA        |
| NA        | 20.58354  | NA        | NA        | NA        | NA        | NA        | NA        | NA        |
| 16.91461  | 14.66966  | 16.69411  | 16.57326  | 16.70854  | 20.67998  | 16.00686  | 17.99048  | 15.59694  |
| 13.83403  | 11.68999  | 13.23482  | 13.22106  | 13.51324  | 12.69099  | 14.34471  | 15.22162  | 13.28217  |

**SAMPLE 3(SAMPLE 3(SAMPLE 3(SAMPLE 3(SAMPLE 3(SAMPLE 3(SAMPLE 3: SAMP**  
20.38392 21.11975 NA 20.42376 NA 21.92019 21.44096 20.13496 NA  
NA NA NA NA NA NA NA NA 21.06493  
16.51272 15.77696 17.64775 16.97855 18.88094 17.69431 16.93114 14.6002 16.27095  
13.53812 13.12186 14.29482 14.23099 15.03847 14.5577 12.44458 12.66888 14.58491

**SAMPLE 3: SAMPLe 3:**

|          |          |          |          |          |          |          |          |          |
|----------|----------|----------|----------|----------|----------|----------|----------|----------|
| 19.25389 | 18.90284 | NA       | 21.36541 | NA       | NA       | NA       | NA       | NA       |
| NA       | NA       | NA       | NA       | NA       | NA       | NA       | NA       | NA       |
| 15.40181 | 14.10556 | 18.09081 | 14.69338 | 19.49871 | 20.19236 | 19.49505 | 18.26881 | 18.66012 |
| 12.4502  | 11.73641 | 15.99355 | 12.69331 | 16.3135  | 16.10709 | 15.47999 | 16.21928 | 16.11746 |

| SAMPLE 3 | SAMPLE 3 | SAMPLE 7 | SAMPLE 9 | SAMPLE 2 | SAMPLE 2 | SAMPLE 3 | SAMPLE 3 | SAMPLE 3 |
|----------|----------|----------|----------|----------|----------|----------|----------|----------|
| NA       | NA       | NA       | 18.30804 | 19.89488 | 19.53259 | NA       | NA       | NA       |
| NA       | NA       | NA       | 20.36298 | NA       | 21.28797 | NA       | NA       | NA       |
| 17.98148 | 16.0928  | 19.54155 | 15.00832 | 16.70669 | 13.65865 | 17.71903 | 20.21248 | NA       |
| 14.2534  | 14.84031 | 13.36223 | 10.7367  | 11.72438 | 9.872611 | 11.70032 | 17.8352  | 16.2766  |

| SAMPLE 3 | SAMPLE 4 | SAMPLE 4 | SAMPLE 4 | SAMPLE 5 | SAMPLE 6 | SAMPLE 6 | SAMPLE 7 | SAMPLE 7 |
|----------|----------|----------|----------|----------|----------|----------|----------|----------|
| NA       | NA       | NA       | NA       | NA       | NA       | NA       | NA       | 20.63282 |
| NA       | NA       | NA       | NA       | NA       | NA       | NA       | NA       | 20.41122 |
| NA       | NA       | 19.58818 | 17.49653 | NA       | 18.39966 | 20.92027 | 17.89146 | 16.37969 |
| 14.21147 | 14.20917 | 14.74111 | 12.46194 | 16.91218 | 13.10475 | 13.9186  | 13.25163 | 14.97232 |

| SAMPLE 8: | SAMPLE 8: | SAMPLE 8: | SAMPLE 8: | SAMPLE 9: | SAMPLE 9: | SAMPLE 9: | SAMPLE 9: | SAMPLE 9: |
|-----------|-----------|-----------|-----------|-----------|-----------|-----------|-----------|-----------|
| NA        | NA        | NA        | NA        | 18.09743  | NA        | NA        | NA        | 21.98979  |
| NA        | NA        | NA        | NA        | NA        | NA        | 21.26209  | NA        | 21.92731  |
| NA        | NA        | NA        | 20.69605  | 13.72273  | 14.05357  | NA        | NA        | 15.58049  |
| 13.86984  | 15.3069   | 12.33946  | 13.20648  | 10.40056  | 13.59922  | 15.42867  | 16.20969  | 13.51868  |

| SAMPLE 1 | SAMPLE 1 | SAMPLE 1 | SAMPLE 1 | SAMPLE 1 | SAMPLE 1 | SAMPLE 1 | SAMPLE 1 | SAMPLE 1 |
|----------|----------|----------|----------|----------|----------|----------|----------|----------|
| NA       | NA       | NA       | NA       | NA       | NA       | NA       | NA       | NA       |
| NA       | 21.69824 | NA       | NA       | NA       | NA       | NA       | NA       | NA       |
| NA       | 20.01697 | 19.73502 | NA       | NA       | NA       | NA       | 17.92586 | 16.70937 |
| 13.45481 | 13.59966 | 12.49154 | 19.55356 | 12.80218 | 13.80926 | 14.71596 | 12.73793 | 15.18245 |

**SAMPLE 1!SAMPLE 1!SAMPLE 1!SAMPLE 1!SAMPLE 1!SAMPLE 1!SAMPLE 1!SAMPLE 1!SAMPLE 1!**  
NA 21.77128 17.87117 NA NA NA NA 20.38625 NA  
NA NA NA NA NA NA NA NA NA  
20.82093 17.15527 14.76983 17.43418 18.29078 NA 18.86011 17.02976 18.53986  
13.85835 11.72971 11.02056 12.2224 13.3562 14.58648 15.68594 12.40897 16.01648

| <b>SAMPLE 1</b> | <b>SAMPLE 1</b> | <b>SAMPLE 1</b> | <b>SAMPLE 184</b> | <b>SAMPLE 185</b> | <b>SAMPLE 196</b> | <b>SAMPLE 199</b> |
|-----------------|-----------------|-----------------|-------------------|-------------------|-------------------|-------------------|
| 20.72475        | NA              | NA              | NA                | NA                | 19.50484897       | 18.63473355       |
| NA              | NA              | NA              | NA                | NA                | NA                | NA                |
| 15.12727        | 17.61753        | 20.79559        | 19.08899356       | 15.86175005       | 13.99554893       | 13.55365788       |
| 13.78521        | 14.95498        | 12.79536        | 16.59662639       | 13.5222616        | 9.868774111       | 9.69216929        |

| <b>SAMPLE 201</b> | <b>SAMPLE 207</b> | <b>SAMPLE 209</b> | <b>SAMPLE 211</b> | <b>SAMPLE 212</b> | <b>SAMPLE 215</b> |
|-------------------|-------------------|-------------------|-------------------|-------------------|-------------------|
| 20.1197196        | 18.83379957       | 19.81831993       | NA                | NA                | NA                |
| 21.55895024       | NA                | 20.51915811       | NA                | 21.828746         | 21.92313879       |
| 14.55384935       | 13.45946174       | 13.75948421       | 15.2057764        | 14.15911121       | 13.4396196        |
| 10.04873134       | 9.617049036       | 10.73902755       | 12.34887701       | 12.35774118       | 9.137443807       |

| <b>SAMPLE 216</b> | <b>SAMPLE 218</b> | <b>SAMPLE 220</b> | <b>SAMPLE 223</b> | <b>SAMPLE 226</b> | <b>SAMPLE 228</b> |
|-------------------|-------------------|-------------------|-------------------|-------------------|-------------------|
| 19.23129557       | 16.81281397       | NA                | 20.77724593       | 19.20567874       | 20.02302595       |
| NA                | 20.86696497       | NA                | NA                | NA                | NA                |
| 14.83772666       | 12.51263574       | 17.1278504        | 15.95045004       | 14.04884835       | 15.40036713       |
| 11.2184057        | 8.530058909       | 11.55508278       | 11.24172194       | 10.10945681       | 11.34860484       |

| <b>SAMPLE 231</b> | <b>SAMPLE 237</b> | <b>SAMPLE 240</b> | <b>SAMPLE 241</b> | <b>SAMPLE 247</b> | <b>SAMPLE 248</b> |
|-------------------|-------------------|-------------------|-------------------|-------------------|-------------------|
| 17.70422252       | NA                | 21.71058466       | 20.57086866       | NA                | NA                |
| 21.53680407       | NA                | NA                | NA                | NA                | NA                |
| 13.55516168       | 17.03318621       | 15.80468997       | 14.89899842       | 13.60518924       | 16.24995572       |
| 9.550553141       | 12.72442533       | 10.9513848        | 10.65445662       | 9.956791233       | 11.97289763       |

| <b>SAMPLE 258</b> | <b>SAMPLE 260</b> | <b>SAMPLE 262</b> | <b>SAMPLE 268</b> | <b>SAMPLE 276</b> | <b>SAMPLE 292</b> |
|-------------------|-------------------|-------------------|-------------------|-------------------|-------------------|
| NA                | 20.27094698       | 20.31562495       | 20.70309632       | 20.95113029       | NA                |
| NA                | NA                | NA                | NA                | NA                | NA                |
| 16.23623654       | 13.89257284       | 13.71560047       | 18.22682614       | 17.46972196       | 14.9036531        |
| 11.65621752       | 10.23515234       | 9.137712345       | 13.00266034       | 13.64161863       | 12.98890777       |

| <b>SAMPLE 297</b> | <b>SAMPLE 298</b> | <b>SAMPLE 300</b> | <b>SAMPLE 310</b> | <b>SAMPLE 314</b> | <b>SAMPLE 315</b> | <b>SAMPLE 321</b> |
|-------------------|-------------------|-------------------|-------------------|-------------------|-------------------|-------------------|
| NA                | NA                | 19.55973184       | NA                | NA                | NA                | NA                |
| NA                | NA                | 20.49622537       | NA                | NA                | NA                | NA                |
| 16.42415221       | 17.85603208       | 16.59171906       | 17.281753         | 17.86738932       | 16.8150523        | 18.81006564       |
| 13.82239157       | 14.41680279       | 13.99838996       | 14.4670326        | 14.55487681       | 14.22242888       | 15.98375027       |

| <b>SAMPLE 322</b> | <b>SAMPLE 325</b> | <b>SAMPLE 326</b> | <b>SAMPLE 329</b> | <b>miRNA_ID</b> | <b>pvalue</b> | <b>foldchange</b> |
|-------------------|-------------------|-------------------|-------------------|-----------------|---------------|-------------------|
| NA                | NA                | NA                | NA                | hsa-miR-4306    | 0.000991      | 1.897824093       |
| NA                | NA                | NA                | NA                | hsa-miR-155-5p  | 0.031         | 0.705053598       |
| 15.59306571       | 19.41081921       | 16.03111146       | 18.45669569       | hsa-miR-423-5p  | 0.047         | 1.519877574       |
| 13.72088587       | 16.32082499       | 14.55097795       | 15.53296292       | hsa-miR-21-5p   | 0.05          | 1.444567157       |
