# Supplementary material for: The ceRNA Crosstalk between mRNAs and lncRNAs in Diabetes Myocardial Infarction
Source: Hindawi journal article supplement (doi:10.1155/2022/4283534), 2022-05-09
Supplement: f3 [file 4283534.f3.pdf]

| ID       | Description      | GeneRatio | BgRatio   | pvalue   | p.adjust | qvalue   | geneID     | Count |
|----------|------------------|-----------|-----------|----------|----------|----------|------------|-------|
| GO:00421 | neutrophil act   | 37/272    | 498/1867C | 3.25E-16 | 1.15E-12 | 9.94E-13 | PLAU/MNI   | 37    |
| GO:00024 | neutrophil me    | 36/272    | 499/1867C | 2.12E-15 | 3.75E-12 | 3.24E-12 | PLAU/MNI   | 36    |
| GO:00433 | neutrophil de    | 35/272    | 485/1867C | 5.33E-15 | 5.68E-12 | 4.9E-12  | PLAU/MNI   | 35    |
| GO:00022 | neutrophil act   | 35/272    | 488/1867C | 6.42E-15 | 5.68E-12 | 4.9E-12  | PLAU/MNI   | 35    |
| GO:00313 | positive regul   | 20/272    | 384/1867C | 9.78E-07 | 0.000692 | 0.000597 | RPS6KA5/F  | 20    |
| GO:00327 | positive regul   | 9/272     | 86/18670  | 4.47E-06 | 0.002108 | 0.001818 | IFNGR1/TH  | 9     |
| GO:00027 | regulation of    | 22/272    | 500/1867C | 4.48E-06 | 0.002108 | 0.001818 | CACNA1E/   | 22    |
| GO:00018 | positive regul   | 21/272    | 464/1867C | 4.83E-06 | 0.002108 | 0.001818 | SULF2/MN   | 21    |
| GO:19035 | positive regul   | 9/272     | 88/18670  | 5.42E-06 | 0.002108 | 0.001818 | IFNGR1/TH  | 9     |
| GO:00326 | chemokine pr     | 9/272     | 89/18670  | 5.95E-06 | 0.002108 | 0.001818 | F2RL1/IL4F | 9     |
| GO:20001 | regulation of    | 14/272    | 239/1867C | 1.16E-05 | 0.003727 | 0.003215 | RPS6KA3/F  | 14    |
| GO:00432 | regulation of    | 13/272    | 215/1867C | 1.7E-05  | 0.005025 | 0.004334 | RPS6KA3/F  | 13    |
| GO:00507 | regulation of    | 20/272    | 472/1867C | 2.12E-05 | 0.005754 | 0.004964 | CACNA1E/   | 20    |
| GO:00027 | positive regul   | 15/272    | 288/1867C | 2.28E-05 | 0.005754 | 0.004964 | F2RL1/IFN  | 15    |
| GO:00028 | regulation of    | 18/272    | 400/1867C | 2.51E-05 | 0.005934 | 0.005119 | RPS6KA5/F  | 18    |
| GO:00431 | negative regul   | 8/272     | 84/18670  | 3.07E-05 | 0.006784 | 0.005852 | RPS6KA3/F  | 8     |
| GO:00022 | pattern recogn   | 12/272    | 197/1867C | 3.34E-05 | 0.006959 | 0.006003 | RPS6KA3/F  | 12    |
| GO:00507 | positive regul   | 14/272    | 268/1867C | 4.13E-05 | 0.00812  | 0.007005 | F2RL1/IFN  | 14    |
| GO:00022 | toll-like recept | 10/272    | 146/1867C | 5.68E-05 | 0.010482 | 0.009042 | RPS6KA3/F  | 10    |
| GO:20001 | negative regul   | 8/272     | 92/18670  | 5.92E-05 | 0.010482 | 0.009042 | RPS6KA3/F  | 8     |
| GO:00725 | reactive oxyge   | 14/272    | 284/1867C | 7.71E-05 | 0.012903 | 0.011131 | F2RL1/PTG  | 14    |
| GO:00716 | granulocyte ch   | 9/272     | 123/1867C | 8.02E-05 | 0.012903 | 0.011131 | THBS1/CAI  | 9     |
| GO:00507 | positive regul   | 10/272    | 153/1867C | 8.42E-05 | 0.012963 | 0.011182 | PTGS2/CLE  | 10    |
| GO:00321 | activation of    | 15/272    | 333/1867C | 0.000118 | 0.017413 | 0.015021 | TXN/GADC   | 15    |
| GO:00985 | detection of e   | 4/272     | 19/18670  | 0.000144 | 0.020354 | 0.017557 | CLEC7A/LY  | 4     |
| GO:00711 | regulation of    | 8/272     | 108/1867C | 0.000183 | 0.023586 | 0.020346 | ARID3A/G   | 8     |
| GO:00510 | positive regul   | 17/272    | 428/1867C | 0.000192 | 0.023586 | 0.020346 | NKX3-1/F2  | 17    |
| GO:00711 | positive regul   | 7/272     | 82/18670  | 0.000193 | 0.023586 | 0.020346 | ARID3A/G   | 7     |
| GO:00070 | cell cycle arre  | 12/272    | 237/1867C | 0.000195 | 0.023586 | 0.020346 | CDC123/N   | 12    |
| GO:00507 | positive regul   | 9/272     | 139/1867C | 0.000204 | 0.023586 | 0.020346 | F2RL1/IFN  | 9     |
| GO:00346 | response to tu   | 14/272    | 312/1867C | 0.000207 | 0.023586 | 0.020346 | NKX3-1/F2  | 14    |
| GO:00328 | negative regul   | 4/272     | 21/18670  | 0.000217 | 0.023996 | 0.0207   | THBS1/RG   | 4     |
| GO:00975 | granulocyte m    | 9/272     | 141/1867C | 0.000227 | 0.024369 | 0.021021 | THBS1/CAI  | 9     |
| GO:00009 | nuclear-transc   | 11/272    | 207/1867C | 0.000237 | 0.024657 | 0.02127  | RPS28/RPS  | 11    |
| GO:00512 | positive regul   | 17/272    | 440/1867C | 0.000265 | 0.026843 | 0.023155 | F2RL1/IFN  | 17    |
| GO:19035 | positive regul   | 16/272    | 403/1867C | 0.000297 | 0.028124 | 0.02426  | NKX3-1/F2  | 16    |
| GO:20012 | positive regul   | 10/272    | 179/1867C | 0.000304 | 0.028124 | 0.02426  | PAK2/NKX   | 10    |
| GO:00064 | mRNA catabol     | 15/272    | 364/1867C | 0.000309 | 0.028124 | 0.02426  | RPS28/RPS  | 15    |
| GO:00709 | protein localiz  | 9/272     | 147/1867C | 0.00031  | 0.028124 | 0.02426  | RPS28/RPS  | 9     |
| GO:00713 | cellular respor  | 13/272    | 291/1867C | 0.000361 | 0.031986 | 0.027592 | NKX3-1/F2  | 13    |
| GO:00001 | nuclear-transc   | 8/272     | 120/1867C | 0.000377 | 0.032534 | 0.028065 | RPS28/RPS  | 8     |
| GO:19049 | positive regul   | 17/272    | 456/1867C | 0.0004   | 0.033738 | 0.029103 | F2RL1/IFN  | 17    |
| GO:00725 | establishment    | 8/272     | 122/1867C | 0.000421 | 0.034673 | 0.02991  | RPS28/RPS  | 8     |
| GO:00324 | detection of n   | 3/272     | 11/18670  | 0.000463 | 0.037231 | 0.032117 | LY96/TLR1  | 3     |
| GO:00026 | positive regul   | 15/272    | 380/1867C | 0.000485 | 0.038167 | 0.032924 | PAK2/PPP   | 15    |
| GO:00507 | positive regul   | 6/272     | 69/18670  | 0.000503 | 0.038271 | 0.033014 | F2RL1/SIRI | 6     |
| GO:00190 | viral gene exp   | 10/272    | 191/1867C | 0.000508 | 0.038271 | 0.033014 | RPS28/RPS  | 10    |

|                            |        |           |          |          |          |            |    |
|----------------------------|--------|-----------|----------|----------|----------|------------|----|
| GO:00064: translational i  | 10/272 | 193/1867C | 0.000551 | 0.040651 | 0.035066 | RPS28/RPS  | 10 |
| GO:00326: regulation of t  | 9/272  | 160/1867C | 0.000576 | 0.04086  | 0.035247 | IFNGR1/TH  | 9  |
| GO:00507: regulation of r  | 7/272  | 98/18670  | 0.000577 | 0.04086  | 0.035247 | F2RL1/SIRI | 7  |
| GO:20003: regulation of r  | 10/272 | 195/1867C | 0.000597 | 0.041457 | 0.035762 | F2RL1/PTC  | 10 |
| GO:00326: tumor necrosi    | 9/272  | 163/1867C | 0.000658 | 0.042144 | 0.036355 | IFNGR1/TH  | 9  |
| GO:19035: regulation of t  | 9/272  | 163/1867C | 0.000658 | 0.042144 | 0.036355 | IFNGR1/TH  | 9  |
| GO:19037: negative regul   | 4/272  | 28/18670  | 0.000685 | 0.042144 | 0.036355 | THBS1/RG:  | 4  |
| GO:00485: negative regul   | 7/272  | 101/1867C | 0.000692 | 0.042144 | 0.036355 | STAT1/SRP  | 7  |
| GO:00486: positive regul   | 7/272  | 101/1867C | 0.000692 | 0.042144 | 0.036355 | PTGS2/THI  | 7  |
| GO:00508: positive regul   | 15/272 | 394/1867C | 0.000704 | 0.042144 | 0.036355 | PAK2/PPP:  | 15 |
| GO:00327: positive regul   | 5/272  | 49/18670  | 0.000715 | 0.042144 | 0.036355 | F2RL1/CLE  | 5  |
| GO:20012: regulation of i  | 9/272  | 165/1867C | 0.000718 | 0.042144 | 0.036355 | NKX3-1/PT  | 9  |
| GO:20003: positive regul   | 7/272  | 102/1867C | 0.000733 | 0.042144 | 0.036355 | F2RL1/PTC  | 7  |
| GO:00064: RNA catabolic    | 15/272 | 397/1867C | 0.00076  | 0.042144 | 0.036355 | RPS28/RPS  | 15 |
| GO:00516: defense respo    | 11/272 | 238/1867C | 0.000768 | 0.042144 | 0.036355 | TRIM56/F2  | 11 |
| GO:00332: tumor necrosi    | 9/272  | 167/1867C | 0.000783 | 0.042144 | 0.036355 | F2RL1/TNF  | 9  |
| GO:19039: negative regul   | 3/272  | 13/18670  | 0.000785 | 0.042144 | 0.036355 | THBS1/RG:  | 3  |
| GO:00024: antigen proce    | 6/272  | 75/18670  | 0.000786 | 0.042144 | 0.036355 | PSMD12/B   | 6  |
| GO:01500: neuroinflamm     | 6/272  | 75/18670  | 0.000786 | 0.042144 | 0.036355 | IFNGR1/PT  | 6  |
| GO:00717: tumor necrosi    | 9/272  | 168/1867C | 0.000817 | 0.042232 | 0.03643  | IFNGR1/TH  | 9  |
| GO:00506: cytokine secre   | 11/272 | 240/1867C | 0.000822 | 0.042232 | 0.03643  | F2RL1/IFN: | 11 |
| GO:00305: neutrophil ch    | 7/272  | 104/1867C | 0.000823 | 0.042232 | 0.03643  | CAMK1D/C   | 7  |
| GO:00066: SRP-depender     | 7/272  | 105/1867C | 0.000871 | 0.044058 | 0.038005 | RPS28/RPS  | 7  |
| GO:00095: detection of b   | 4/272  | 30/18670  | 0.000896 | 0.044677 | 0.038539 | CLEC7A/LY  | 4  |
| GO:00022: T cell activati  | 7/272  | 106/1867C | 0.000921 | 0.044856 | 0.038693 | F2RL1/CLE  | 7  |
| GO:00096: response to fu   | 5/272  | 52/18670  | 0.00094  | 0.044856 | 0.038693 | CLEC7A/S1  | 5  |
| GO:00300: insulin secreti  | 10/272 | 207/1867C | 0.000945 | 0.044856 | 0.038693 | CACNA1E/   | 10 |
| GO:20012: regulation of e  | 15/272 | 406/1867C | 0.000953 | 0.044856 | 0.038693 | PAK2/NKX:  | 15 |
| GO:00902: regulation of r  | 10/272 | 208/1867C | 0.000981 | 0.044856 | 0.038693 | CACNA1E/   | 10 |
| GO:19033: regulation of r  | 13/272 | 324/1867C | 0.000984 | 0.044856 | 0.038693 | TOB1/RBV   | 13 |
| GO:00985: detection of o   | 3/272  | 14/18670  | 0.000988 | 0.044856 | 0.038693 | CLEC7A/TL  | 3  |
| GO:19046: glucose transr   | 7/272  | 108/1867C | 0.001029 | 0.045731 | 0.039448 | CLTCL1/HK  | 7  |
| GO:00425: antigen proce    | 6/272  | 79/18670  | 0.001033 | 0.045731 | 0.039448 | PSMD12/B   | 6  |
| GO:00507: regulation of c  | 10/272 | 210/1867C | 0.001055 | 0.046087 | 0.039755 | F2RL1/IFN: | 10 |
| GO:00066: cotranslation    | 7/272  | 109/1867C | 0.001086 | 0.046877 | 0.040437 | RPS28/RPS  | 7  |
| GO:00028: positive regul   | 11/272 | 249/1867C | 0.001109 | 0.047027 | 0.040567 | RPS6KA5/F  | 11 |
| GO:00507: regulation of i  | 9/272  | 176/1867C | 0.001135 | 0.047027 | 0.040567 | CACNA1E/   | 9  |
| GO:00022: activation of i  | 8/272  | 142/1867C | 0.001144 | 0.047027 | 0.040567 | RPS6KA5/F  | 8  |
| GO:00300: peptide horm     | 11/272 | 250/1867C | 0.001145 | 0.047027 | 0.040567 | CACNA1E/   | 11 |
| GO:00190: viral transcript | 9/272  | 177/1867C | 0.001181 | 0.047027 | 0.040567 | RPS28/RPS  | 9  |
| GO:00341: toll-like recept | 3/272  | 15/18670  | 0.001222 | 0.047027 | 0.040567 | F2RL1/TLR  | 3  |
| GO:00445: long-chain fat   | 3/272  | 15/18670  | 0.001222 | 0.047027 | 0.040567 | ACSL1/THE  | 3  |
| GO:00517: positive regul   | 3/272  | 15/18670  | 0.001222 | 0.047027 | 0.040567 | STAT1/TLR  | 3  |
| GO:01403: lipid import in  | 3/272  | 15/18670  | 0.001222 | 0.047027 | 0.040567 | ACSL1/THE  | 3  |
| GO:20004: positive regul   | 3/272  | 15/18670  | 0.001222 | 0.047027 | 0.040567 | F2RL1/TLR  | 3  |
| GO:00326: regulation of c  | 6/272  | 82/18670  | 0.001256 | 0.047793 | 0.041227 | F2RL1/IL4F | 6  |
| GO:00086: hexose transn    | 7/272  | 112/1867C | 0.001272 | 0.047921 | 0.041338 | CLTCL1/HK  | 7  |
| GO:00513: negative regul   | 16/272 | 463/1867C | 0.001311 | 0.048591 | 0.041916 | RPS6KA3/F  | 16 |

|                                              |        |           |          |          |          |            |    |
|----------------------------------------------|--------|-----------|----------|----------|----------|------------|----|
| GO:000697: DNA damage                        | 5/272  | 56/18670  | 0.001318 | 0.048591 | 0.041916 | ARID3A/GA  | 5  |
| GO:000223: stimulatory C-                    | 7/272  | 113/18670 | 0.00134  | 0.048902 | 0.042184 | RPS6KA5/F  | 7  |
| GO:001574: monosaccharide                    | 7/272  | 114/18670 | 0.00141  | 0.050533 | 0.043591 | CLTCL1/HK  | 7  |
| GO:007243: signal transduction               | 5/272  | 57/18670  | 0.001427 | 0.050533 | 0.043591 | ARID3A/GA  | 5  |
| GO:190241: intracellular signaling           | 5/272  | 57/18670  | 0.001427 | 0.050533 | 0.043591 | ARID3A/GA  | 5  |
| GO:005254: regulation of cell cycle          | 15/272 | 425/18670 | 0.0015   | 0.051316 | 0.044266 | RPS6KA3/F  | 15 |
| GO:190391: negative regulation of cell cycle | 6/272  | 85/18670  | 0.001512 | 0.051316 | 0.044266 | SRPK2/IFIT | 6  |
| GO:003273: positive regulation of cell cycle | 5/272  | 58/18670  | 0.001544 | 0.051316 | 0.044266 | IL4R/CLEC  | 5  |
| GO:005109: positive regulation of cell cycle | 8/272  | 149/18670 | 0.001556 | 0.051316 | 0.044266 | RPS6KA5/F  | 8  |
| GO:000223: innate immune response            | 7/272  | 116/18670 | 0.001559 | 0.051316 | 0.044266 | RPS6KA5/F  | 7  |
| GO:003421: carbohydrate metabolic process    | 7/272  | 116/18670 | 0.001559 | 0.051316 | 0.044266 | CLTCL1/HK  | 7  |
| GO:005109: positive regulation of cell cycle | 11/272 | 261/18670 | 0.001615 | 0.051316 | 0.044266 | RPS6KA5/F  | 11 |
| GO:200101: negative regulation of cell cycle | 4/272  | 35/18670  | 0.001617 | 0.051316 | 0.044266 | TXN/RGS2,  | 4  |
| GO:000271: innate immune response            | 7/272  | 117/18670 | 0.001638 | 0.051316 | 0.044266 | RPS6KA5/F  | 7  |
| GO:004688: regulation of cell cycle          | 11/272 | 262/18670 | 0.001664 | 0.051316 | 0.044266 | CACNA1E/   | 11 |
| GO:003289: regulation of cell cycle          | 5/272  | 59/18670  | 0.001667 | 0.051316 | 0.044266 | THBS1/RG   | 5  |
| GO:004501: negative regulation of cell cycle | 5/272  | 59/18670  | 0.001667 | 0.051316 | 0.044266 | SRPK2/IFIT | 5  |
| GO:007243: signal transduction               | 5/272  | 59/18670  | 0.001667 | 0.051316 | 0.044266 | ARID3A/GA  | 5  |
| GO:190241: intracellular signaling           | 5/272  | 59/18670  | 0.001667 | 0.051316 | 0.044266 | ARID3A/GA  | 5  |
| GO:190241: intracellular signaling           | 5/272  | 59/18670  | 0.001667 | 0.051316 | 0.044266 | ARID3A/GA  | 5  |
| GO:003051: leukocyte chemotaxis              | 10/272 | 224/18670 | 0.001708 | 0.051616 | 0.044525 | F2RL1/THE  | 10 |
| GO:004501: protein target                    | 7/272  | 118/18670 | 0.001721 | 0.051616 | 0.044525 | RPS28/RPS  | 7  |
| GO:199021: neutrophil migration              | 7/272  | 118/18670 | 0.001721 | 0.051616 | 0.044525 | CAMK1D/C   | 7  |
| GO:003251: maintenance of cell cycle         | 5/272  | 60/18670  | 0.001797 | 0.05302  | 0.045736 | TXN/GOLP   | 5  |
| GO:004631: regulation of cell cycle          | 5/272  | 60/18670  | 0.001797 | 0.05302  | 0.045736 | CLTCL1/HK  | 5  |
| GO:001631: dephosphorylation                 | 16/272 | 478/18670 | 0.001814 | 0.053068 | 0.045778 | PPP2R3A/F  | 16 |
| GO:003088: regulation of cell cycle          | 5/272  | 61/18670  | 0.001935 | 0.056142 | 0.048429 | MNDA/TN    | 5  |
| GO:004681: hormone secretion                 | 12/272 | 308/18670 | 0.001952 | 0.056167 | 0.048451 | CACNA1E/   | 12 |
| GO:004511: maintenance of cell cycle         | 6/272  | 90/18670  | 0.002027 | 0.057874 | 0.049924 | TXN/GOLP   | 6  |
| GO:000974: response to cytokine              | 10/272 | 230/18670 | 0.002074 | 0.058749 | 0.050678 | PTGS2/PFK  | 10 |
| GO:004351: regulation of cell cycle          | 3/272  | 18/18670  | 0.002122 | 0.059154 | 0.051028 | RPS6KA3/F  | 3  |
| GO:190201: fatty acid transport              | 3/272  | 18/18670  | 0.002122 | 0.059154 | 0.051028 | THBS1/IRS  | 3  |
| GO:004631: positive regulation of cell cycle | 4/272  | 38/18670  | 0.002203 | 0.060801 | 0.052448 | CLTCL1/IR  | 4  |
| GO:003151: mitotic G1 DNA damage             | 5/272  | 63/18670  | 0.002233 | 0.060801 | 0.052448 | ARID3A/GA  | 5  |
| GO:004481: mitotic G1/S transition           | 5/272  | 63/18670  | 0.002233 | 0.060801 | 0.052448 | ARID3A/GA  | 5  |
| GO:004471: G1 DNA damage                     | 5/272  | 64/18670  | 0.002394 | 0.064684 | 0.055798 | ARID3A/GA  | 5  |
| GO:000991: hormone transport                 | 12/272 | 317/18670 | 0.002474 | 0.066352 | 0.057237 | CACNA1E/   | 12 |
| GO:004211: macrophage activation             | 6/272  | 95/18670  | 0.002665 | 0.070443 | 0.060766 | IFNGR1/TH  | 6  |
| GO:005081: defense response                  | 4/272  | 40/18670  | 0.002666 | 0.070443 | 0.060766 | S100A9/IL  | 4  |
| GO:005254: regulation of cell cycle          | 15/272 | 452/18670 | 0.00271  | 0.071063 | 0.0613   | RPS6KA3/F  | 15 |
| GO:000241: antigen processing                | 6/272  | 96/18670  | 0.002808 | 0.072829 | 0.062824 | PSMD12/B   | 6  |
| GO:000961: response to virus                 | 12/272 | 323/18670 | 0.002882 | 0.072829 | 0.062824 | TRIM56/F2  | 12 |
| GO:004251: positive regulation of cell cycle | 3/272  | 20/18670  | 0.002902 | 0.072829 | 0.062824 | THBS1/CLE  | 3  |
| GO:005171: nitric oxide synthesis            | 3/272  | 20/18670  | 0.002902 | 0.072829 | 0.062824 | STAT1/TLR  | 3  |
| GO:005171: regulation of cell cycle          | 3/272  | 20/18670  | 0.002902 | 0.072829 | 0.062824 | STAT1/TLR  | 3  |
| GO:000974: response to cytokine              | 9/272  | 202/18670 | 0.00291  | 0.072829 | 0.062824 | PTGS2/PFK  | 9  |
| GO:015001: regulation of cell cycle          | 4/272  | 41/18670  | 0.002921 | 0.072829 | 0.062824 | PTGS2/LRF  | 4  |
| GO:004801: regulation of cell cycle          | 6/272  | 98/18670  | 0.003113 | 0.076228 | 0.065756 | RBM7/SRP   | 6  |

|                                                 |        |           |          |          |          |                |    |
|-------------------------------------------------|--------|-----------|----------|----------|----------|----------------|----|
| GO:000225: T cell differentiation               | 5/272  | 68/18670  | 0.003122 | 0.076228 | 0.065756 | CLEC4D/IL4     | 5  |
| GO:004633: glucose import                       | 5/272  | 68/18670  | 0.003122 | 0.076228 | 0.065756 | CLTCL1/HK1     | 5  |
| GO:003073: ovulation                            | 3/272  | 21/18670  | 0.003349 | 0.079181 | 0.068303 | PTGS2/IL4I     | 3  |
| GO:005193: regulation of transcription          | 3/272  | 21/18670  | 0.003349 | 0.079181 | 0.068303 | PPP2R3C/IL4    | 3  |
| GO:190023: positive regulation of transcription | 3/272  | 21/18670  | 0.003349 | 0.079181 | 0.068303 | MME/EIF2       | 3  |
| GO:190443: positive regulation of transcription | 3/272  | 21/18670  | 0.003349 | 0.079181 | 0.068303 | IFNGR1/OPN     | 3  |
| GO:004273: signal transduction                  | 7/272  | 133/18670 | 0.003379 | 0.079181 | 0.068303 | ARID3A/GATA1   | 7  |
| GO:005103: regulation of transcription          | 13/272 | 373/18670 | 0.003387 | 0.079181 | 0.068303 | TXN/AKTIP      | 13 |
| GO:003423: response to morphogen                | 9/272  | 207/18670 | 0.003422 | 0.079181 | 0.068303 | PTGS2/PFKFB3   | 9  |
| GO:007053: response to inhibitor                | 9/272  | 207/18670 | 0.003422 | 0.079181 | 0.068303 | RPS6KA5/PTGS2  | 9  |
| GO:005073: regulation of transcription          | 13/272 | 374/18670 | 0.003465 | 0.079642 | 0.068701 | PTGS2/CLE      | 13 |
| GO:004343: regulation of transcription          | 7/272  | 135/18670 | 0.00367  | 0.08381  | 0.072297 | RBM7/SRP       | 7  |
| GO:000963: response to morphogen                | 9/272  | 210/18670 | 0.003762 | 0.084803 | 0.073153 | KIAA0319/PTGS2 | 9  |
| GO:009753: myeloid leukocyte                    | 9/272  | 210/18670 | 0.003762 | 0.084803 | 0.073153 | THBS1/CAI      | 9  |
| GO:001083: positive regulation of transcription | 4/272  | 44/18670  | 0.003785 | 0.084803 | 0.073153 | CLTCL1/IRS1    | 4  |
| GO:005063: regulation of transcription          | 5/272  | 73/18670  | 0.004243 | 0.091655 | 0.079064 | STAT1/IFIT     | 5  |
| GO:007243: signal transduction                  | 5/272  | 73/18670  | 0.004243 | 0.091655 | 0.079064 | ARID3A/GATA1   | 5  |
| GO:007243: signal transduction                  | 5/272  | 73/18670  | 0.004243 | 0.091655 | 0.079064 | ARID3A/GATA1   | 5  |
| GO:005083: cognition                            | 11/272 | 296/18670 | 0.004246 | 0.091655 | 0.079064 | PTGS2/MMP      | 11 |
| GO:004503: positive regulation of transcription | 9/272  | 214/18670 | 0.004255 | 0.091655 | 0.079064 | RPS6KA5/F      | 9  |
| GO:190373: regulation of transcription          | 15/272 | 475/18670 | 0.004295 | 0.091655 | 0.079064 | PPP2R3C/PTGS2  | 15 |
| GO:003413: positive regulation of transcription | 3/272  | 23/18670  | 0.004365 | 0.091655 | 0.079064 | F2RL1/TLR      | 3  |
| GO:005153: negative regulation of transcription | 3/272  | 23/18670  | 0.004365 | 0.091655 | 0.079064 | RGS2/RAP1      | 3  |
| GO:005183: mitochondrial transcription          | 3/272  | 23/18670  | 0.004365 | 0.091655 | 0.079064 | PPP2R3C/IL4    | 3  |
| GO:007113: negative regulation of transcription | 3/272  | 23/18670  | 0.004365 | 0.091655 | 0.079064 | MDM4/RP        | 3  |
| GO:000283: positive regulation of transcription | 6/272  | 105/18670 | 0.004376 | 0.091655 | 0.079064 | EXOSC3/B       | 6  |
| GO:003263: regulation of transcription          | 5/272  | 74/18670  | 0.004497 | 0.093097 | 0.080308 | F2RL1/CLE      | 5  |
| GO:007233: signal transduction                  | 5/272  | 74/18670  | 0.004497 | 0.093097 | 0.080308 | ARID3A/GATA1   | 5  |
| GO:005103: regulation of transcription          | 14/272 | 432/18670 | 0.004572 | 0.094103 | 0.081175 | RPS6KA5/PTGS2  | 14 |
| GO:004333: regulation of transcription          | 9/272  | 217/18670 | 0.004657 | 0.095301 | 0.082209 | AKTIP/NKX      | 9  |
| GO:003033: DNA damage response                  | 6/272  | 107/18670 | 0.004797 | 0.097333 | 0.083962 | ARID3A/GATA1   | 6  |
| GO:007133: cellular response                    | 8/272  | 179/18670 | 0.004812 | 0.097333 | 0.083962 | RPS6KA5/PTGS2  | 8  |
| GO:000223: lymphocyte activation                | 8/272  | 181/18670 | 0.00514  | 0.103383 | 0.08918  | F2RL1/CLE      | 8  |
| GO:004503: positive regulation of transcription | 11/272 | 305/18670 | 0.005298 | 0.105953 | 0.091398 | RPS6KA5/F      | 11 |
| GO:004393: regulation of transcription          | 9/272  | 222/18670 | 0.005393 | 0.107123 | 0.092407 | POLR2J/F2      | 9  |
| GO:000003: DNA damage response                  | 7/272  | 145/18670 | 0.005417 | 0.107123 | 0.092407 | ARID3A/GATA1   | 7  |
| GO:003803: NIK/NF-kappa                         | 8/272  | 183/18670 | 0.005485 | 0.107873 | 0.093054 | PSMD12/E       | 8  |
| GO:200043: regulation of transcription          | 3/272  | 25/18670  | 0.005549 | 0.107986 | 0.093151 | F2RL1/TLR      | 3  |
| GO:199003: cellular response                    | 4/272  | 49/18670  | 0.005582 | 0.107986 | 0.093151 | RAPGEF1/I      | 4  |
| GO:200123: positive regulation of transcription | 4/272  | 49/18670  | 0.005582 | 0.107986 | 0.093151 | PAK2/THBS      | 4  |
| GO:001083: positive regulation of transcription | 5/272  | 78/18670  | 0.005624 | 0.108198 | 0.093334 | CLTCL1/HK1     | 5  |
| GO:003013: regulation of transcription          | 5/272  | 79/18670  | 0.005934 | 0.112033 | 0.096642 | PLAU/F2RI      | 5  |
| GO:007123: cellular response                    | 5/272  | 79/18670  | 0.005934 | 0.112033 | 0.096642 | PTGS2/GATA1    | 5  |
| GO:007233: signal transduction                  | 10/272 | 267/18670 | 0.005955 | 0.112033 | 0.096642 | ARID3A/TAF     | 10 |
| GO:000023: protein polyubiquitination           | 11/272 | 310/18670 | 0.005966 | 0.112033 | 0.096642 | WSB1/TRIP      | 11 |
| GO:009863: regulation of transcription          | 6/272  | 112/18670 | 0.005981 | 0.112033 | 0.096642 | PFN2/CDK       | 6  |
| GO:000863: carbohydrate                         | 7/272  | 148/18670 | 0.006046 | 0.11205  | 0.096657 | CLTCL1/HK1     | 7  |
| GO:006103: regulation of transcription          | 7/272  | 148/18670 | 0.006046 | 0.11205  | 0.096657 | PLAU/F2RI      | 7  |

|                           |        |           |          |          |          |            |    |
|---------------------------|--------|-----------|----------|----------|----------|------------|----|
| GO:00022: positive regul  | 3/272  | 26/18670  | 0.006206 | 0.112581 | 0.097115 | STAT1/EIF  | 3  |
| GO:19001: regulation of r | 3/272  | 26/18670  | 0.006206 | 0.112581 | 0.097115 | NKX3-1/B2  | 3  |
| GO:19039: regulation of r | 3/272  | 26/18670  | 0.006206 | 0.112581 | 0.097115 | THBS1/RG   | 3  |
| GO:00219: cerebral corte  | 6/272  | 113/18670 | 0.006242 | 0.112581 | 0.097115 | TACC3/CD   | 6  |
| GO:19000: regulation of l | 5/272  | 80/18670  | 0.006256 | 0.112581 | 0.097115 | PLAU/F2R   | 5  |
| GO:00072: I-kappaB kinas  | 10/272 | 269/18670 | 0.006265 | 0.112581 | 0.097115 | F2RL1/STA  | 10 |
| GO:00016: response to h   | 12/272 | 359/18670 | 0.006622 | 0.118385 | 0.102122 | PLAU/NKX   | 12 |
| GO:00109: regulation of r | 15/272 | 499/18670 | 0.006684 | 0.118902 | 0.102567 | KIAA0319/  | 15 |
| GO:20012: negative regul  | 9/272  | 230/18670 | 0.006753 | 0.11952  | 0.1031   | PTGS2/TH   | 9  |
| GO:19900: response to n   | 4/272  | 52/18670  | 0.006895 | 0.120312 | 0.103784 | RAPGEF1/I  | 4  |
| GO:00430: positive regul  | 3/272  | 27/18670  | 0.006907 | 0.120312 | 0.103784 | THBS1/IL4  | 3  |
| GO:00109: negative regul  | 12/272 | 361/18670 | 0.006908 | 0.120312 | 0.103784 | ARID3A/PS  | 12 |
| GO:00326: interleukin-8 r | 5/272  | 82/18670  | 0.006937 | 0.120312 | 0.103784 | F2RL1/CLE  | 5  |
| GO:00342: positive regul  | 7/272  | 152/18670 | 0.006967 | 0.120312 | 0.103784 | CDC123/IF  | 7  |
| GO:00436: regulation of r | 6/272  | 117/18670 | 0.007366 | 0.125503 | 0.108261 | PPP2R3A/I  | 6  |
| GO:00001: activation of M | 4/272  | 53/18670  | 0.007374 | 0.125503 | 0.108261 | RAPGEF1/I  | 4  |
| GO:00301: negative regul  | 4/272  | 53/18670  | 0.007374 | 0.125503 | 0.108261 | PLAU/THB   | 4  |
| GO:00427: fibrinolysis    | 3/272  | 28/18670  | 0.007654 | 0.129246 | 0.111491 | PLAU/THB   | 3  |
| GO:00508: regulation of c | 5/272  | 84/18670  | 0.007667 | 0.129246 | 0.111491 | PLAU/F2R   | 5  |
| GO:19000: negative regul  | 4/272  | 54/18670  | 0.007875 | 0.132117 | 0.113967 | PLAU/THB   | 4  |
| GO:00315: DNA integrity   | 7/272  | 157/18670 | 0.008261 | 0.13469  | 0.116187 | ARID3A/G   | 7  |
| GO:00432: negative regul  | 7/272  | 157/18670 | 0.008261 | 0.13469  | 0.116187 | PTGS2/TH   | 7  |
| GO:00300: myeloid cell d  | 13/272 | 416/18670 | 0.008269 | 0.13469  | 0.116187 | F2RL1/THE  | 13 |
| GO:00362: response to d   | 12/272 | 370/18670 | 0.00832  | 0.13469  | 0.116187 | PLAU/NKX   | 12 |
| GO:00421: T cell activati | 14/272 | 464/18670 | 0.008383 | 0.13469  | 0.116187 | PAK2/F2R   | 14 |
| GO:00097: response to gl  | 8/272  | 197/18670 | 0.00842  | 0.13469  | 0.116187 | PFKFB2/TH  | 8  |
| GO:00105: positive regul  | 3/272  | 29/18670  | 0.008447 | 0.13469  | 0.116187 | SULF2/PTC  | 3  |
| GO:00356: TRIF-depende    | 3/272  | 29/18670  | 0.008447 | 0.13469  | 0.116187 | UBE2D3/L   | 3  |
| GO:00482: sperm capacit   | 3/272  | 29/18670  | 0.008447 | 0.13469  | 0.116187 | DLD/ROPN   | 3  |
| GO:00702: negative regul  | 3/272  | 29/18670  | 0.008447 | 0.13469  | 0.116187 | FADD/HIF1  | 3  |
| GO:00726: interleukin-8 s | 3/272  | 29/18670  | 0.008447 | 0.13469  | 0.116187 | F2RL1/TLR  | 3  |
| GO:00165: protein deubiq  | 10/272 | 283/18670 | 0.008807 | 0.136783 | 0.117992 | USP15/USI  | 10 |
| GO:00109: regulation of t | 2/272  | 10/18670  | 0.00881  | 0.136783 | 0.117992 | EIF2AK2/EI | 2  |
| GO:00341: regulation of t | 2/272  | 10/18670  | 0.00881  | 0.136783 | 0.117992 | F2RL1/TLR  | 2  |
| GO:00519: negative regul  | 2/272  | 10/18670  | 0.00881  | 0.136783 | 0.117992 | RGS2/ABA   | 2  |
| GO:00711: response to in  | 2/272  | 10/18670  | 0.00881  | 0.136783 | 0.117992 | STAT1/IL9  | 2  |
| GO:19001: positive regul  | 2/272  | 10/18670  | 0.00881  | 0.136783 | 0.117992 | B2M/MMF    | 2  |
| GO:00434: regulation of c | 5/272  | 87/18670  | 0.008861 | 0.136977 | 0.11816  | PFKFB2/RA  | 5  |
| GO:00197: antimicrobial   | 16/272 | 122/18670 | 0.008968 | 0.138024 | 0.119063 | PPP2R3C/C  | 6  |
| GO:00380: Fc receptor sig | 9/272  | 241/18670 | 0.009035 | 0.138453 | 0.119433 | PAK2/CLEC  | 9  |
| GO:00028: regulation of r | 7/272  | 160/18670 | 0.009118 | 0.139125 | 0.120012 | IL4R/EXOS  | 7  |
| GO:00017: B cell homeos   | 3/272  | 30/18670  | 0.009286 | 0.139877 | 0.120661 | PPP2R3C/T  | 3  |
| GO:00217: olfactory bulb  | 3/272  | 30/18670  | 0.009286 | 0.139877 | 0.120661 | EOMES/LR   | 3  |
| GO:00506: regulation of c | 3/272  | 30/18670  | 0.009286 | 0.139877 | 0.120661 | PAK2/EIF2  | 3  |
| GO:00435: positive regul  | 4/272  | 57/18670  | 0.009509 | 0.14167  | 0.122208 | SRPK2/NQ   | 4  |
| GO:00508: negative regul  | 4/272  | 57/18670  | 0.009509 | 0.14167  | 0.122208 | PLAU/THB   | 4  |
| GO:00469: carboxylic acic | 11/272 | 331/18670 | 0.009525 | 0.14167  | 0.122208 | ACSL1/THE  | 11 |
| GO:00066: protein target  | 8/272  | 202/18670 | 0.009711 | 0.143839 | 0.124079 | RPS28/RPS  | 8  |

|                                  |           |          |          |          |            |    |
|----------------------------------|-----------|----------|----------|----------|------------|----|
| GO:001584 organic acid tr 11/272 | 333/18670 | 0.009934 | 0.145778 | 0.125752 | ACSL1/THE  | 11 |
| GO:003083 negative regul 4/272   | 58/18670  | 0.010099 | 0.145778 | 0.125752 | PFN2/TMS   | 4  |
| GO:003166 lipopolysaccha 4/272   | 58/18670  | 0.010099 | 0.145778 | 0.125752 | LY96/TLR2  | 4  |
| GO:009715 intrinsic apopt 10/272 | 289/18670 | 0.010111 | 0.145778 | 0.125752 | NKX3-1/PT  | 10 |
| GO:005125 positive regul 11/272  | 334/18670 | 0.010144 | 0.145778 | 0.125752 | PAK2/PPP2  | 11 |
| GO:000665 leukotriene m 3/272    | 31/18670  | 0.010172 | 0.145778 | 0.125752 | CYP4F3/TL  | 3  |
| GO:002198 olfactory lobe 3/272   | 31/18670  | 0.010172 | 0.145778 | 0.125752 | EOMES/LR   | 3  |
| GO:005195 regulation of c 3/272  | 31/18670  | 0.010172 | 0.145778 | 0.125752 | RGS2/RAB1  | 3  |
| GO:000018 activation of M 2/272  | 11/18670  | 0.010665 | 0.150409 | 0.129746 | GADD45G/   | 2  |
| GO:003165 positive regul 2/272   | 11/18670  | 0.010665 | 0.150409 | 0.129746 | PTGS2/AB1  | 2  |
| GO:004562 regulation of T 2/272  | 11/18670  | 0.010665 | 0.150409 | 0.129746 | IL4R/IL18  | 2  |
| GO:004872 regulation of s 2/272  | 11/18670  | 0.010665 | 0.150409 | 0.129746 | HDAC4/LM   | 2  |
| GO:004872 skeletal muscl 3/272   | 32/18670  | 0.011105 | 0.155381 | 0.134035 | BIN3/HDA1  | 3  |
| GO:190444 regulation of t 3/272  | 32/18670  | 0.011105 | 0.155381 | 0.134035 | IFNGR1/OI  | 3  |
| GO:001095 negative regul 9/272   | 250/18670 | 0.011302 | 0.157512 | 0.135873 | RPS6KA3/F  | 9  |
| GO:005075 regulation of v 8/272  | 208/18670 | 0.011449 | 0.15879  | 0.136976 | POLR2J/ST  | 8  |
| GO:003205 positive regul 5/272   | 93/18670  | 0.011622 | 0.15879  | 0.136976 | AKTIP/B2M  | 5  |
| GO:000190 cell killing 7/272     | 168/18670 | 0.011719 | 0.15879  | 0.136976 | F2RL1/CAN  | 7  |
| GO:190595 negative regul 4/272   | 61/18670  | 0.012009 | 0.15879  | 0.136976 | THBS1/IRS  | 4  |
| GO:200124 positive regul 4/272   | 61/18670  | 0.012009 | 0.15879  | 0.136976 | NKX3-1/S1  | 4  |
| GO:004866 regulation of s 7/272  | 169/18670 | 0.012078 | 0.15879  | 0.136976 | PTGS2/THI  | 7  |
| GO:005116 negative regul 7/272   | 169/18670 | 0.012078 | 0.15879  | 0.136976 | NKX3-1/IFI | 7  |
| GO:000275 MyD88-indepr 3/272     | 33/18670  | 0.012086 | 0.15879  | 0.136976 | UBE2D3/L1  | 3  |
| GO:001003 response to ir 3/272   | 33/18670  | 0.012086 | 0.15879  | 0.136976 | B2M/HIF1A  | 3  |
| GO:190123 positive regul 5/272   | 94/18670  | 0.012133 | 0.15879  | 0.136976 | SRPK2/NQ   | 5  |
| GO:001816 peptidyl-serin 10/272  | 299/18670 | 0.012607 | 0.15879  | 0.136976 | TXN/RPS6H  | 10 |
| GO:007064 protein modifi 10/272  | 299/18670 | 0.012607 | 0.15879  | 0.136976 | USP15/USI  | 10 |
| GO:000276 positive regul 5/272   | 95/18670  | 0.012659 | 0.15879  | 0.136976 | F2RL1/IL4F | 5  |
| GO:003114 SCF-depender 5/272     | 95/18670  | 0.012659 | 0.15879  | 0.136976 | PSMD12/A   | 5  |
| GO:004216 B cell prolifer 5/272  | 95/18670  | 0.012659 | 0.15879  | 0.136976 | MNDA/TN    | 5  |
| GO:004407 regulation of c 5/272  | 95/18670  | 0.012659 | 0.15879  | 0.136976 | THBS1/RG1  | 5  |
| GO:004506 regulation of v 5/272  | 95/18670  | 0.012659 | 0.15879  | 0.136976 | SRPK2/IFIT | 5  |
| GO:001604 detection of b 2/272   | 12/18670  | 0.012675 | 0.15879  | 0.136976 | TLR1/TLR2  | 2  |
| GO:003818 nerve growth 2/272     | 12/18670  | 0.012675 | 0.15879  | 0.136976 | RAPGEF1/I  | 2  |
| GO:005154 positive regul 2/272   | 12/18670  | 0.012675 | 0.15879  | 0.136976 | MMP9/MF    | 2  |
| GO:005187 killing by host 2/272  | 12/18670  | 0.012675 | 0.15879  | 0.136976 | F2RL1/CAN  | 2  |
| GO:006023 positive regul 2/272   | 12/18670  | 0.012675 | 0.15879  | 0.136976 | TOB1/TNR   | 2  |
| GO:006036 regulation of f 2/272  | 12/18670  | 0.012675 | 0.15879  | 0.136976 | RAPGEF1/I  | 2  |
| GO:007048 leukocyte aggr 2/272   | 12/18670  | 0.012675 | 0.15879  | 0.136976 | S100A9/S1  | 2  |
| GO:009016 Golgi ribbon fr 2/272  | 12/18670  | 0.012675 | 0.15879  | 0.136976 | GOLPH3/G   | 2  |
| GO:000226 lymphocyte h 4/272     | 62/18670  | 0.012694 | 0.15879  | 0.136976 | PPP2R3C/T  | 4  |
| GO:001083 regulation of r 4/272  | 62/18670  | 0.012694 | 0.15879  | 0.136976 | SCGB3A1/I  | 4  |
| GO:003164 killing of cells 4/272 | 62/18670  | 0.012694 | 0.15879  | 0.136976 | F2RL1/CAN  | 4  |
| GO:007026 necrotic cell d 4/272  | 62/18670  | 0.012694 | 0.15879  | 0.136976 | PYGL/LY96  | 4  |
| GO:004865 smooth muscl 7/272     | 171/18670 | 0.012821 | 0.159807 | 0.137853 | PTGS2/THI  | 7  |
| GO:000763 learning or me 9/272   | 256/18670 | 0.013034 | 0.160099 | 0.138105 | PTGS2/MM   | 9  |
| GO:001057 regulation of v 3/272  | 34/18670  | 0.013115 | 0.160099 | 0.138105 | SULF2/PTC  | 3  |
| GO:003214 activation of p 3/272  | 34/18670  | 0.013115 | 0.160099 | 0.138105 | TXN/IL18/c | 3  |

|                                              |           |          |          |          |            |    |
|----------------------------------------------|-----------|----------|----------|----------|------------|----|
| GO:00425: tumor necrosis factor signaling    | 34/18670  | 0.013115 | 0.160099 | 0.138105 | THBS1/CLE  | 3  |
| GO:00425: regulation of transcription        | 34/18670  | 0.013115 | 0.160099 | 0.138105 | THBS1/CLE  | 3  |
| GO:00622: positive regulation of cell growth | 34/18670  | 0.013115 | 0.160099 | 0.138105 | F2RL1/TLR  | 3  |
| GO:00704: response to oxidative stress       | 394/18670 | 0.013204 | 0.160621 | 0.138556 | PLAU/NKX   | 12 |
| GO:00159: fatty acid transport               | 97/18670  | 0.013757 | 0.166211 | 0.143377 | ACSL1/THE  | 5  |
| GO:00447: mitotic DNA replication            | 97/18670  | 0.013757 | 0.166211 | 0.143377 | ARID3A/G/  | 5  |
| GO:00603: cell chemotaxis                    | 304/18670 | 0.014017 | 0.167334 | 0.144346 | F2RL1/THE  | 10 |
| GO:00465: positive regulation of cell growth | 64/18670  | 0.014137 | 0.167334 | 0.144346 | F2RL1/RAF  | 4  |
| GO:00157: organic anion transport            | 495/18670 | 0.014139 | 0.167334 | 0.144346 | ABCC5/AC   | 14 |
| GO:00149: myotube cell fusion                | 35/18670  | 0.014193 | 0.167334 | 0.144346 | BIN3/HDAI  | 3  |
| GO:00341: toll-like receptor signaling       | 35/18670  | 0.014193 | 0.167334 | 0.144346 | F2RL1/LY9  | 3  |
| GO:00450: positive regulation of cell growth | 35/18670  | 0.014193 | 0.167334 | 0.144346 | SRPK2/IFIT | 3  |
| GO:19907: tumor necrosis factor signaling    | 35/18670  | 0.014193 | 0.167334 | 0.144346 | IFNGR1/OI  | 3  |
| GO:19038: organic acid transport             | 135/18670 | 0.014275 | 0.167334 | 0.144346 | THBS1/RG   | 6  |
| GO:19050: carboxylic acid transport          | 135/18670 | 0.014275 | 0.167334 | 0.144346 | THBS1/RG   | 6  |
| GO:20012: negative regulation of cell growth | 98/18670  | 0.014329 | 0.167411 | 0.144413 | PTGS2/PLA  | 5  |
| GO:00027: positive regulation of cell growth | 136/18670 | 0.014758 | 0.168952 | 0.145742 | F2RL1/IL4F | 6  |
| GO:00300: lymphocyte differentiation         | 353/18670 | 0.014818 | 0.168952 | 0.145742 | PPP2R3C/C  | 11 |
| GO:00067: estrogen biosynthesis              | 13/18670  | 0.014837 | 0.168952 | 0.145742 | HSD17B11   | 2  |
| GO:00316: regulation of transcription        | 13/18670  | 0.014837 | 0.168952 | 0.145742 | PTGS2/AB   | 2  |
| GO:00343: response to tyrosine               | 99/18670  | 0.014917 | 0.168952 | 0.145742 | TRIM56/IF  | 5  |
| GO:00104: negative regulation of cell growth | 262/18670 | 0.014956 | 0.168952 | 0.145742 | RPS6KA3/F  | 9  |
| GO:00026: positive regulation of cell growth | 219/18670 | 0.015216 | 0.168952 | 0.145742 | F2RL1/RAF  | 8  |
| GO:00516: maintenance of cell growth         | 219/18670 | 0.015216 | 0.168952 | 0.145742 | TXN/GOLP   | 8  |
| GO:00506: regulation of transcription        | 137/18670 | 0.015252 | 0.168952 | 0.145742 | RBM7/SRP   | 6  |
| GO:00027: MyD88-dependent signaling          | 36/18670  | 0.01532  | 0.168952 | 0.145742 | LY96/TLR1  | 3  |
| GO:00105: vascular endothelial cell growth   | 36/18670  | 0.01532  | 0.168952 | 0.145742 | SULF2/PTC  | 3  |
| GO:00107: macrophage differentiation         | 36/18670  | 0.01532  | 0.168952 | 0.145742 | STAT1/NFκ  | 3  |
| GO:00400: regulation of transcription        | 36/18670  | 0.01532  | 0.168952 | 0.145742 | SULF2/THE  | 3  |
| GO:00425: superoxide anion transport         | 36/18670  | 0.01532  | 0.168952 | 0.145742 | F2RL1/CLE  | 3  |
| GO:00716: regulation of transcription        | 36/18670  | 0.01532  | 0.168952 | 0.145742 | PTGS2/THI  | 3  |
| GO:00900: foam cell differentiation          | 36/18670  | 0.01532  | 0.168952 | 0.145742 | STAT1/NFκ  | 3  |
| GO:00903: regulation of transcription        | 36/18670  | 0.01532  | 0.168952 | 0.145742 | F2RL1/CLE  | 3  |
| GO:00972: amyloid-beta transport             | 36/18670  | 0.01532  | 0.168952 | 0.145742 | IFNGR1/M   | 3  |
| GO:00015: regulation of transcription        | 355/18670 | 0.015391 | 0.169206 | 0.145961 | PTGS2/UPI  | 11 |
| GO:00028: positive regulation of cell growth | 100/18670 | 0.015521 | 0.169584 | 0.146287 | EXOSC3/B   | 5  |
| GO:00704: interleukin-1 signaling            | 100/18670 | 0.015521 | 0.169584 | 0.146287 | RPS6KA5/F  | 5  |
| GO:00900: negative regulation of cell growth | 178/18670 | 0.015678 | 0.170767 | 0.147307 | RAPGEF1/I  | 7  |
| GO:00080: regulation of transcription        | 179/18670 | 0.01612  | 0.173449 | 0.149621 | F2RL1/PFN  | 7  |
| GO:00108: regulation of transcription        | 179/18670 | 0.01612  | 0.173449 | 0.149621 | UBE2D3/P   | 7  |
| GO:00510: positive regulation of cell growth | 179/18670 | 0.01612  | 0.173449 | 0.149621 | TXN/AKTIP  | 7  |
| GO:19030: regulation of transcription        | 179/18670 | 0.01612  | 0.173449 | 0.149621 | PLAU/F2RL  | 7  |
| GO:00353: regulation of transcription        | 139/18670 | 0.016273 | 0.173607 | 0.149758 | PPP2R3A/I  | 6  |
| GO:00515: regulation of transcription        | 139/18670 | 0.016273 | 0.173607 | 0.149758 | PFN2/RGS   | 6  |
| GO:00458: negative regulation of cell growth | 358/18670 | 0.016282 | 0.173607 | 0.149758 | RPS6KA3/F  | 11 |
| GO:00457: respiratory burst                  | 37/18670  | 0.016496 | 0.174839 | 0.15082  | CLEC7A/C/  | 3  |
| GO:00506: regulation of transcription        | 37/18670  | 0.016496 | 0.174839 | 0.15082  | STAT1/EIF  | 3  |
| GO:00308: regulation of transcription        | 180/18670 | 0.016571 | 0.175108 | 0.151052 | F2RL1/PFN  | 7  |

|                                  |           |          |          |          |            |    |
|----------------------------------|-----------|----------|----------|----------|------------|----|
| GO:00025: leukocyte mig 2/272    | 14/18670  | 0.017146 | 0.176954 | 0.152644 | S100A9/S1  | 2  |
| GO:00343: NAD biosynth 2/272     | 14/18670  | 0.017146 | 0.176954 | 0.152644 | PTGS2/SLC  | 2  |
| GO:00435: regulation of t 2/272  | 14/18670  | 0.017146 | 0.176954 | 0.152644 | EIF2AK2/EI | 2  |
| GO:00450: T-helper 2 cell 2/272  | 14/18670  | 0.017146 | 0.176954 | 0.152644 | IL4R/IL18  | 2  |
| GO:00515: regulation of l 2/272  | 14/18670  | 0.017146 | 0.176954 | 0.152644 | MMP9/M/    | 2  |
| GO:00517: positive regul 2/272   | 14/18670  | 0.017146 | 0.176954 | 0.152644 | F2RL1/CLE  | 2  |
| GO:00602: regulation of r 2/272  | 14/18670  | 0.017146 | 0.176954 | 0.152644 | TOB1/TNR   | 2  |
| GO:19001: negative regul 2/272   | 14/18670  | 0.017146 | 0.176954 | 0.152644 | NKX3-1/B2  | 2  |
| GO:00313: positive regul 4/272   | 68/18670  | 0.017326 | 0.178296 | 0.153802 | F2RL1/CLE  | 4  |
| GO:00320: negative regul 5/272   | 103/18670 | 0.017431 | 0.178337 | 0.153837 | NKX3-1/IFI | 5  |
| GO:00347: negative regul 5/272   | 103/18670 | 0.017431 | 0.178337 | 0.153837 | THBS1/RG   | 5  |
| GO:00512: maintenance c 10/272   | 315/18670 | 0.01753  | 0.178837 | 0.154269 | TXN/GOLP   | 10 |
| GO:00108: positive regul 3/272   | 38/18670  | 0.017721 | 0.179751 | 0.155057 | SCGB3A1/I  | 3  |
| GO:00716: transforming g 3/272   | 38/18670  | 0.017721 | 0.179751 | 0.155057 | PTGS2/THI  | 3  |
| GO:00198: antigen proce 8/272    | 226/18670 | 0.018038 | 0.182445 | 0.157381 | THBS1/PSM  | 8  |
| GO:00159: long-chain fat 4/272   | 69/18670  | 0.018187 | 0.183429 | 0.15823  | ACSL1/THE  | 4  |
| GO:00026: regulation of i 13/272 | 462/18670 | 0.018379 | 0.184834 | 0.159442 | F2RL1/RAF  | 13 |
| GO:00508: regulation of l 7/272  | 184/18670 | 0.018464 | 0.185168 | 0.15973  | PPP2R3C/I  | 7  |
| GO:19037: positive regul 7/272   | 185/18670 | 0.018961 | 0.189148 | 0.163163 | PPP2R3C/S  | 7  |
| GO:00713: cellular respor 6/272  | 144/18670 | 0.019032 | 0.189148 | 0.163163 | CLEC7A/PT  | 6  |
| GO:00341: regulation of t 4/272  | 70/18670  | 0.019075 | 0.189148 | 0.163163 | F2RL1/LY9  | 4  |
| GO:00519: regulation of s 4/272  | 70/18670  | 0.019075 | 0.189148 | 0.163163 | PTGS2/RAI  | 4  |
| GO:00447: mitotic DNA ir 5/272   | 106/18670 | 0.019489 | 0.18976  | 0.163692 | ARID3A/G/  | 5  |
| GO:00024: antigen proce 2/272    | 15/18670  | 0.019595 | 0.18976  | 0.163692 | B2M/TAP2   | 2  |
| GO:00170: protein nitros 2/272   | 15/18670  | 0.019595 | 0.18976  | 0.163692 | S100A9/S1  | 2  |
| GO:00181: peptidyl-cyste 2/272   | 15/18670  | 0.019595 | 0.18976  | 0.163692 | S100A9/S1  | 2  |
| GO:00198: antigen proce 2/272    | 15/18670  | 0.019595 | 0.18976  | 0.163692 | B2M/TAP2   | 2  |
| GO:00324: Rap protein si 2/272   | 15/18670  | 0.019595 | 0.18976  | 0.163692 | RAPGEF1/I  | 2  |
| GO:00454: positive regul 2/272   | 15/18670  | 0.019595 | 0.18976  | 0.163692 | CLEC7A/TL  | 2  |
| GO:00518: killing of cells 2/272 | 15/18670  | 0.019595 | 0.18976  | 0.163692 | F2RL1/CAN  | 2  |
| GO:00028: regulation of e 6/272  | 145/18670 | 0.019619 | 0.18976  | 0.163692 | IL4R/EXOS  | 6  |
| GO:00064: protein depho 10/272   | 321/18670 | 0.019701 | 0.190032 | 0.163926 | PPP2R3A/I  | 10 |
| GO:00069: phagocytosis 11/272    | 369/18670 | 0.019881 | 0.19125  | 0.164976 | F2RL1/SIRI | 11 |
| GO:00510: positive regul 4/272   | 71/18670  | 0.019989 | 0.191766 | 0.165422 | F2RL1/RAF  | 4  |
| GO:00182: peptidyl-serin 10/272  | 322/18670 | 0.020081 | 0.192129 | 0.165734 | TXN/RPS6I  | 10 |
| GO:00325: regulation of c 11/272 | 370/18670 | 0.020236 | 0.193083 | 0.166558 | IFRD1/F2R  | 11 |
| GO:00313: negative regul 7/272   | 188/18670 | 0.020505 | 0.19513  | 0.168323 | KIAA0319/  | 7  |
| GO:00320: positive regul 4/272   | 72/18670  | 0.02093  | 0.197052 | 0.169981 | PFKFB2/HI  | 4  |
| GO:00322: negative regul 4/272   | 72/18670  | 0.02093  | 0.197052 | 0.169981 | PFN2/TMS   | 4  |
| GO:00518: regulation of r 4/272  | 72/18670  | 0.02093  | 0.197052 | 0.169981 | PPP2R3C/I  | 4  |
| GO:19020: regulation of l 4/272  | 72/18670  | 0.02093  | 0.197052 | 0.169981 | PSMD12/E   | 4  |
| GO:00163: dendrite deve 8/272    | 233/18670 | 0.021219 | 0.199241 | 0.171869 | KIAA0319/  | 8  |
| GO:00607: regulation of r 7/272  | 190/18670 | 0.021582 | 0.1993   | 0.171921 | F2RL1/IFN  | 7  |
| GO:00308: positive regul 3/272   | 41/18670  | 0.021693 | 0.1993   | 0.171921 | TNFSF13B/  | 3  |
| GO:00610: establishment 3/272    | 41/18670  | 0.021693 | 0.1993   | 0.171921 | F2RL1/RAF  | 3  |
| GO:00024: immune respc 13/272    | 473/18670 | 0.0218   | 0.1993   | 0.171921 | RPS6KA5/F  | 13 |
| GO:00027: immune respc 13/272    | 473/18670 | 0.0218   | 0.1993   | 0.171921 | RPS6KA5/F  | 13 |
| GO:00068: superoxide m 4/272     | 73/18670  | 0.021897 | 0.1993   | 0.171921 | F2RL1/CLE  | 4  |



|                                  |           |          |          |          |            |    |
|----------------------------------|-----------|----------|----------|----------|------------|----|
| GO:006184 antimicrobial 4/272    | 73/18670  | 0.021897 | 0.1993   | 0.171921 | CAMP/S10   | 4  |
| GO:001965 ribose phosph 12/272   | 424/18670 | 0.022087 | 0.1993   | 0.171921 | DLD/PDE7,  | 12 |
| GO:190390 regulation of 6/272    | 149/18670 | 0.022094 | 0.1993   | 0.171921 | SRPK2/IFIT | 6  |
| GO:000243 antigen proce 2/272    | 16/18670  | 0.022182 | 0.1993   | 0.171921 | B2M/TAP2   | 2  |
| GO:000283 positive regul 2/272   | 16/18670  | 0.022182 | 0.1993   | 0.171921 | IL4R/IL18  | 2  |
| GO:001933 lipoyxygenase 2/272    | 16/18670  | 0.022182 | 0.1993   | 0.171921 | PTGS2/ALC  | 2  |
| GO:003055 nuclear body 2/272     | 16/18670  | 0.022182 | 0.1993   | 0.171921 | SRPK2/SUI  | 2  |
| GO:004598 negative regul 2/272   | 16/18670  | 0.022182 | 0.1993   | 0.171921 | PTGS2/RG   | 2  |
| GO:005123 sequestering 2/272     | 16/18670  | 0.022182 | 0.1993   | 0.171921 | S100A9/S1  | 2  |
| GO:005144 negative regul 2/272   | 16/18670  | 0.022182 | 0.1993   | 0.171921 | RPL23/DT   | 2  |
| GO:190200 positive regul 2/272   | 16/18670  | 0.022182 | 0.1993   | 0.171921 | IFNGR1/PI  | 2  |
| GO:190188 regulation of 7/272    | 192/18670 | 0.022698 | 0.203314 | 0.175383 | NTNG2/RA   | 7  |
| GO:000605 pyruvate met 6/272     | 150/18670 | 0.022744 | 0.203314 | 0.175383 | DLD/PFKFE  | 6  |
| GO:005118 cofactor trans 3/272   | 42/18670  | 0.023116 | 0.206126 | 0.177809 | LMBRD1/F   | 3  |
| GO:009950 synaptic vesicl 7/272  | 193/18670 | 0.023271 | 0.206981 | 0.178546 | PFN2/CDK   | 7  |
| GO:007123 cellular respor 10/272 | 331/18670 | 0.023748 | 0.21017  | 0.181298 | RGR/PTGS   | 10 |
| GO:010400 cellular respor 10/272 | 331/18670 | 0.023748 | 0.21017  | 0.181298 | RGR/PTGS   | 10 |
| GO:001490 myotube diffe 5/272    | 112/18670 | 0.024072 | 0.211392 | 0.182351 | SCGB3A1/I  | 5  |
| GO:000163 cellular glucos 6/272  | 152/18670 | 0.024082 | 0.211392 | 0.182351 | HK2/PTPRI  | 6  |
| GO:009015 establishment 10/272   | 332/18670 | 0.024183 | 0.211392 | 0.182351 | RPS28/RPS  | 10 |
| GO:005134 negative regul 9/272   | 285/18670 | 0.024289 | 0.211392 | 0.182351 | PAK2/SH3I  | 9  |
| GO:003090 forebrain dev 11/272   | 381/18670 | 0.024446 | 0.211392 | 0.182351 | TACC3/B2I  | 11 |
| GO:006083 regulation of 9/272    | 286/18670 | 0.024771 | 0.211392 | 0.182351 | SULF2/RAF  | 9  |
| GO:003023 T cell differen 8/272  | 240/18670 | 0.024778 | 0.211392 | 0.182351 | CLEC4D/IL  | 8  |
| GO:000605 glycolytic proc 5/272  | 113/18670 | 0.024897 | 0.211392 | 0.182351 | PFKFB2/HK  | 5  |
| GO:003260 interferon-gar 5/272   | 113/18670 | 0.024897 | 0.211392 | 0.182351 | F2RL1/CLE  | 5  |
| GO:000605 lactate metab 2/272    | 17/18670  | 0.024901 | 0.211392 | 0.182351 | PFKFB2/HI  | 2  |
| GO:003164 heat generatic 2/272   | 17/18670  | 0.024901 | 0.211392 | 0.182351 | PTGS2/AB   | 2  |
| GO:005170 regulation of 2/272    | 17/18670  | 0.024901 | 0.211392 | 0.182351 | F2RL1/CLE  | 2  |
| GO:006020 regulation of 2/272    | 17/18670  | 0.024901 | 0.211392 | 0.182351 | CLEC7A/C   | 2  |
| GO:007185 mitotic cell cy 2/272  | 17/18670  | 0.024901 | 0.211392 | 0.182351 | NKX3-1/G   | 2  |
| GO:009015 negative regul 2/272   | 17/18670  | 0.024901 | 0.211392 | 0.182351 | STAT1/MM   | 2  |
| GO:190268 regulation of 2/272    | 17/18670  | 0.024901 | 0.211392 | 0.182351 | RAP1A/NP   | 2  |
| GO:200120 regulation of 2/272    | 17/18670  | 0.024901 | 0.211392 | 0.182351 | PLAUR/MM   | 2  |
| GO:006104 negative regul 4/272   | 76/18670  | 0.024961 | 0.211395 | 0.182355 | PLAU/THB   | 4  |
| GO:007190 positive regul 10/272  | 334/18670 | 0.025072 | 0.211822 | 0.182722 | GADD45G,   | 10 |
| GO:000675 ATP generatio 5/272    | 114/18670 | 0.02574  | 0.216086 | 0.1864   | PFKFB2/HK  | 5  |
| GO:000611 regulation of 4/272    | 77/18670  | 0.026037 | 0.216086 | 0.1864   | PFKFB2/R   | 4  |
| GO:001655 histone deace 4/272    | 77/18670  | 0.026037 | 0.216086 | 0.1864   | SAP30/JDP  | 4  |
| GO:006141 regulation of 4/272    | 77/18670  | 0.026037 | 0.216086 | 0.1864   | PSMD12/P   | 4  |
| GO:005124 regulation of 13/272   | 485/18670 | 0.026053 | 0.216086 | 0.1864   | PAK2/PPP   | 13 |
| GO:003023 macrophage d 3/272     | 44/18670  | 0.026111 | 0.216086 | 0.1864   | FADD/TLR   | 3  |
| GO:007020 necroptotic pr 3/272   | 44/18670  | 0.026111 | 0.216086 | 0.1864   | PYGL/LY96  | 3  |
| GO:007163 regulation of 3/272    | 44/18670  | 0.026111 | 0.216086 | 0.1864   | THBS1/CAI  | 3  |
| GO:001093 negative regul 6/272   | 155/18670 | 0.026187 | 0.216086 | 0.1864   | KIAA0319/  | 6  |
| GO:200123 regulation of 6/272    | 155/18670 | 0.026187 | 0.216086 | 0.1864   | PAK2/THB   | 6  |
| GO:001605 carbohydrate 7/272     | 198/18670 | 0.026284 | 0.216381 | 0.186655 | PFKFB2/PY  | 7  |
| GO:006103 regulation of 7/272    | 199/18670 | 0.026917 | 0.221079 | 0.190708 | TOB1/PSM   | 7  |

|                            |        |           |          |          |          |            |    |
|----------------------------|--------|-----------|----------|----------|----------|------------|----|
| GO:19033: positive regul   | 4/272  | 78/18670  | 0.027141 | 0.221739 | 0.191277 | TOB1/RBM   | 4  |
| GO:20003: regulation of    | 4/272  | 78/18670  | 0.027141 | 0.221739 | 0.191277 | PFN2/RAB   | 4  |
| GO:00108: positive regul   | 5/272  | 116/18670 | 0.027482 | 0.221739 | 0.191277 | UBE2D3/P   | 5  |
| GO:00434: regulation of    | 6/272  | 157/18670 | 0.027656 | 0.221739 | 0.191277 | PFKFB2/RA  | 6  |
| GO:19002: regulation of    | 13/272 | 45/18670  | 0.027683 | 0.221739 | 0.191277 | MME/EIF2   | 3  |
| GO:00310: positive regul   | 2/272  | 18/18670  | 0.027749 | 0.221739 | 0.191277 | JDP2/LRRK  | 2  |
| GO:00420: interferon-gar   | 2/272  | 18/18670  | 0.027749 | 0.221739 | 0.191277 | CLEC7A/IL  | 2  |
| GO:00519: positive regul   | 2/272  | 18/18670  | 0.027749 | 0.221739 | 0.191277 | RAB3GAP1   | 2  |
| GO:00702: negative regul   | 2/272  | 18/18670  | 0.027749 | 0.221739 | 0.191277 | FADD/HIF1  | 2  |
| GO:00901: regulation of    | 2/272  | 18/18670  | 0.027749 | 0.221739 | 0.191277 | F2RL1/IL4F | 2  |
| GO:01500: positive regul   | 2/272  | 18/18670  | 0.027749 | 0.221739 | 0.191277 | LRRK2/IL1  | 2  |
| GO:19001: positive regul   | 2/272  | 18/18670  | 0.027749 | 0.221739 | 0.191277 | TOB1/TNR   | 2  |
| GO:00488: homeostasis      | 8/272  | 246/18670 | 0.028145 | 0.224397 | 0.19357  | PPP2R3C/S  | 8  |
| GO:00511: regulation of    | 5/272  | 117/18670 | 0.02838  | 0.224994 | 0.194085 | SCGB3A1/I  | 5  |
| GO:19012: regulation of    | 15/272 | 117/18670 | 0.02838  | 0.224994 | 0.194085 | EIF2AK2/P  | 5  |
| GO:00164: cytosolic trans  | 6/272  | 158/18670 | 0.02841  | 0.224994 | 0.194085 | AKTIP/CLT  | 6  |
| GO:00000: G2/M transiti    | 8/272  | 247/18670 | 0.028735 | 0.22706  | 0.195867 | PSMD12/C   | 8  |
| GO:00516: mitochondri      | 3/272  | 46/18670  | 0.029304 | 0.230452 | 0.198793 | KIF1B/HIF1 | 3  |
| GO:19019: negative regul   | 8/272  | 248/18670 | 0.029334 | 0.230452 | 0.198793 | ARID3A/PS  | 8  |
| GO:00022: response to m    | 10/272 | 343/18670 | 0.02936  | 0.230452 | 0.198793 | RPS6KA3/F  | 10 |
| GO:00215: telencephalon    | 8/272  | 249/18670 | 0.029942 | 0.232801 | 0.20082  | TACC3/CDI  | 8  |
| GO:19033: regulation of    | 6/272  | 160/18670 | 0.02996  | 0.232801 | 0.20082  | F2RL1/IL4F | 6  |
| GO:19019: regulation of    | 12/272 | 444/18670 | 0.030081 | 0.232801 | 0.20082  | ARID3A/PS  | 12 |
| GO:00332: regulation of    | 4/272  | 81/18670  | 0.030617 | 0.232801 | 0.20082  | PSMD12/P   | 4  |
| GO:00000: ribosomal sm     | 2/272  | 19/18670  | 0.03072  | 0.232801 | 0.20082  | RPS28/RPS  | 2  |
| GO:00019: regulation of    | 5/272  | 19/18670  | 0.03072  | 0.232801 | 0.20082  | F2RL1/MM   | 2  |
| GO:00025: chronic inflam   | 2/272  | 19/18670  | 0.03072  | 0.232801 | 0.20082  | THBS1/S1C  | 2  |
| GO:00027: positive regul   | 2/272  | 19/18670  | 0.03072  | 0.232801 | 0.20082  | B2M/IL18   | 2  |
| GO:00108: negative regul   | 2/272  | 19/18670  | 0.03072  | 0.232801 | 0.20082  | NFKBIA/O   | 2  |
| GO:00329: positive regul   | 2/272  | 19/18670  | 0.03072  | 0.232801 | 0.20082  | F2RL1/CLE  | 2  |
| GO:00341: toll-like recept | 2/272  | 19/18670  | 0.03072  | 0.232801 | 0.20082  | F2RL1/FAC  | 2  |
| GO:00353: long-chain fat   | 2/272  | 19/18670  | 0.03072  | 0.232801 | 0.20082  | ACSL1/HSC  | 2  |
| GO:00515: keratinocyte r   | 2/272  | 19/18670  | 0.03072  | 0.232801 | 0.20082  | MMP9/M     | 2  |
| GO:19017: positive regul   | 2/272  | 19/18670  | 0.03072  | 0.232801 | 0.20082  | SCGB3A1/I  | 2  |
| GO:20006: regulation of    | 2/272  | 19/18670  | 0.03072  | 0.232801 | 0.20082  | STAT1/MM   | 2  |
| GO:00511: nuclear trans    | 10/272 | 346/18670 | 0.030899 | 0.232801 | 0.20082  | TXN/PTGS   | 10 |
| GO:00450: G0 to G1 trans   | 3/272  | 47/18670  | 0.030974 | 0.232801 | 0.20082  | MDM4/EP    | 3  |
| GO:00456: regulation of    | 3/272  | 47/18670  | 0.030974 | 0.232801 | 0.20082  | STAT1/B2M  | 3  |
| GO:00504: amyloid-beta     | 13/272 | 47/18670  | 0.030974 | 0.232801 | 0.20082  | IFNGR1/M   | 3  |
| GO:20001: negative regul   | 3/272  | 47/18670  | 0.030974 | 0.232801 | 0.20082  | FADD/HIF1  | 3  |
| GO:00456: regulation of    | 8/272  | 251/18670 | 0.031183 | 0.23339  | 0.201328 | THBS1/STA  | 8  |
| GO:00105: positive regul   | 5/272  | 120/18670 | 0.031185 | 0.23339  | 0.201328 | HK2/RAB3   | 5  |
| GO:00308: regulation of    | 6/272  | 162/18670 | 0.031564 | 0.235731 | 0.203347 | PFN2/GMF   | 6  |
| GO:00302: negative regul   | 4/272  | 82/18670  | 0.031831 | 0.236233 | 0.20378  | TOB1/SRG   | 4  |
| GO:00346: cellular respor  | 4/272  | 82/18670  | 0.031831 | 0.236233 | 0.20378  | PTGS2/MM   | 4  |
| GO:00975: lamellipodium    | 4/272  | 82/18670  | 0.031831 | 0.236233 | 0.20378  | BIN3/GOLF  | 4  |
| GO:00714: cellular respor  | 7/272  | 207/18670 | 0.032358 | 0.238053 | 0.20535  | NKX3-1/PT  | 7  |
| GO:00157: monocarboxyl     | 6/272  | 163/18670 | 0.032387 | 0.238053 | 0.20535  | ACSL1/THE  | 6  |

|                                                 |        |           |          |          |          |                |    |
|-------------------------------------------------|--------|-----------|----------|----------|----------|----------------|----|
| GO:000911: purine ribonucleoside                | 11/272 | 399/18670 | 0.032662 | 0.238053 | 0.20535  | DLD/PDE7A      | 11 |
| GO:000171: microglial cell                      | 3/272  | 48/18670  | 0.032694 | 0.238053 | 0.20535  | IFNGR1/TLR1    | 3  |
| GO:000221: leukocyte activation                 | 3/272  | 48/18670  | 0.032694 | 0.238053 | 0.20535  | IFNGR1/TLR1    | 3  |
| GO:000271: positive regulation of cell growth   | 3/272  | 48/18670  | 0.032694 | 0.238053 | 0.20535  | B2M/FADD5L     | 3  |
| GO:004591: positive regulation of cell growth   | 3/272  | 48/18670  | 0.032694 | 0.238053 | 0.20535  | PTGS2/RGS1     | 3  |
| GO:006031: face development                     | 3/272  | 48/18670  | 0.032694 | 0.238053 | 0.20535  | RAB3GAP1       | 3  |
| GO:006021: hematopoietic cell lineage           | 4/272  | 83/18670  | 0.033074 | 0.238053 | 0.20535  | PSMD12/E2F1    | 4  |
| GO:005061: regulation of cell growth            | 7/272  | 208/18670 | 0.033086 | 0.238053 | 0.20535  | MNDA/TNFR1     | 7  |
| GO:001901: viral genome replication             | 5/272  | 122/18670 | 0.033148 | 0.238053 | 0.20535  | SRPK2/IFITM1   | 5  |
| GO:004601: ADP metabolism                       | 5/272  | 122/18670 | 0.033148 | 0.238053 | 0.20535  | PFKFB2/HK2     | 5  |
| GO:000231: cytokine secretion                   | 2/272  | 20/18670  | 0.033811 | 0.238053 | 0.20535  | F2RL1/TLR1     | 2  |
| GO:001001: response to mechanical stimulus      | 2/272  | 20/18670  | 0.033811 | 0.238053 | 0.20535  | PTGS2/LRF      | 2  |
| GO:003271: positive regulation of cell growth   | 2/272  | 20/18670  | 0.033811 | 0.238053 | 0.20535  | RPS6KA5/CDC25A | 2  |
| GO:003541: cellular response to hypoxia         | 2/272  | 20/18670  | 0.033811 | 0.238053 | 0.20535  | MNDA/STAT1     | 2  |
| GO:004811: behavioral response                  | 2/272  | 20/18670  | 0.033811 | 0.238053 | 0.20535  | FADD/ABAB1     | 2  |
| GO:007161: positive regulation of cell growth   | 2/272  | 20/18670  | 0.033811 | 0.238053 | 0.20535  | PTGS2/THSD7B   | 2  |
| GO:009011: chemokine secretion                  | 2/272  | 20/18670  | 0.033811 | 0.238053 | 0.20535  | F2RL1/IL4F1    | 2  |
| GO:190001: positive regulation of cell growth   | 2/272  | 20/18670  | 0.033811 | 0.238053 | 0.20535  | CLEC7A/IL1R1   | 2  |
| GO:190011: regulation of cell growth            | 2/272  | 20/18670  | 0.033811 | 0.238053 | 0.20535  | TOB1/TNFR1     | 2  |
| GO:190291: positive regulation of cell growth   | 2/272  | 20/18670  | 0.033811 | 0.238053 | 0.20535  | IFNGR1/PI3K    | 2  |
| GO:190351: positive regulation of cell growth   | 2/272  | 20/18670  | 0.033811 | 0.238053 | 0.20535  | HK2/HIF1A      | 2  |
| GO:000811: actin polymerization                 | 7/272  | 209/18670 | 0.033825 | 0.238053 | 0.20535  | F2RL1/PFN1     | 7  |
| GO:003291: regulation of cell growth            | 7/272  | 209/18670 | 0.033825 | 0.238053 | 0.20535  | MNDA/TNFR1     | 7  |
| GO:003531: regulation of cell growth            | 7/272  | 209/18670 | 0.033825 | 0.238053 | 0.20535  | PPP2R3A/IFITM1 | 7  |
| GO:000321: regulation of cell growth            | 3/272  | 49/18670  | 0.034462 | 0.240621 | 0.207565 | PPP2R3C/IFITM1 | 3  |
| GO:004311: negative regulation of cell growth   | 3/272  | 49/18670  | 0.034462 | 0.240621 | 0.207565 | STAT1/USF1     | 3  |
| GO:004501: actin nucleation                     | 3/272  | 49/18670  | 0.034462 | 0.240621 | 0.207565 | GMFG/ARHGAP1   | 3  |
| GO:009731: programmed cell death                | 3/272  | 49/18670  | 0.034462 | 0.240621 | 0.207565 | PYGL/LY96      | 3  |
| GO:003011: negative regulation of cell growth   | 7/272  | 210/18670 | 0.034575 | 0.240936 | 0.207837 | RAPGEF1/IFITM1 | 7  |
| GO:001651: histone modification                 | 12/272 | 454/18670 | 0.034781 | 0.241898 | 0.208667 | RPS6KA5/USF1   | 12 |
| GO:000701: centrosome cycle                     | 5/272  | 124/18670 | 0.035186 | 0.244235 | 0.210683 | GADD45A/USF1   | 5  |
| GO:190151: regulation of cell growth            | 4/272  | 85/18670  | 0.035642 | 0.246916 | 0.212996 | PSMD12/E2F1    | 4  |
| GO:004341: positive regulation of cell growth   | 8/272  | 258/18670 | 0.035804 | 0.247154 | 0.2132   | GADD45G/USF1   | 8  |
| GO:190151: fatty acid derivative metabolism     | 6/272  | 167/18670 | 0.035816 | 0.247154 | 0.2132   | PTGS2/ACSL1    | 6  |
| GO:000901: cellular amino acid metabolism       | 5/272  | 125/18670 | 0.036234 | 0.247715 | 0.213684 | DLD/BCKD1      | 5  |
| GO:200011: negative regulation of cell growth   | 5/272  | 125/18670 | 0.036234 | 0.247715 | 0.213684 | ARID3A/GADD45A | 5  |
| GO:000941: response to cell stress              | 3/272  | 50/18670  | 0.036279 | 0.247715 | 0.213684 | RBM3/EIF2AK1   | 3  |
| GO:001011: body morphology                      | 3/272  | 50/18670  | 0.036279 | 0.247715 | 0.213684 | RAB3GAP1       | 3  |
| GO:003261: interferon-beta production           | 3/272  | 50/18670  | 0.036279 | 0.247715 | 0.213684 | TRIM56/PFN1    | 3  |
| GO:005081: positive regulation of cell growth   | 6/272  | 168/18670 | 0.036709 | 0.247715 | 0.213684 | PTGS2/MMP1     | 6  |
| GO:009901: vesicle-mediated transport           | 7/272  | 213/18670 | 0.036891 | 0.247715 | 0.213684 | PFN2/CDK1      | 7  |
| GO:000171: leukocyte homeostasis                | 4/272  | 86/18670  | 0.036969 | 0.247715 | 0.213684 | PPP2R3C/IFITM1 | 4  |
| GO:000691: activation of cell growth            | 4/272  | 86/18670  | 0.036969 | 0.247715 | 0.213684 | NKX3-1/S1      | 4  |
| GO:000901: branched-chain amino acid metabolism | 2/272  | 21/18670  | 0.037017 | 0.247715 | 0.213684 | DLD/BCKD1      | 2  |
| GO:000901: branched-chain amino acid metabolism | 2/272  | 21/18670  | 0.037017 | 0.247715 | 0.213684 | DLD/BCKD1      | 2  |
| GO:003051: negative regulation of cell growth   | 2/272  | 21/18670  | 0.037017 | 0.247715 | 0.213684 | SRGN/HIF1      | 2  |
| GO:003611: phosphatidyls synthesis              | 2/272  | 21/18670  | 0.037017 | 0.247715 | 0.213684 | MBOAT1/CDK1    | 2  |
| GO:004801: positive regulation of cell growth   | 2/272  | 21/18670  | 0.037017 | 0.247715 | 0.213684 | RBM3/RBM1      | 2  |

|                           |        |           |          |          |          |            |    |
|---------------------------|--------|-----------|----------|----------|----------|------------|----|
| GO:01400:neuron projec    | 2/272  | 21/18670  | 0.037017 | 0.247715 | 0.213684 | PHACTR1/I  | 2  |
| GO:19017:regulation of r  | 2/272  | 21/18670  | 0.037017 | 0.247715 | 0.213684 | SCGB3A1/I  | 2  |
| GO:00324:regulation of t  | 5/272  | 126/18670 | 0.037301 | 0.249142 | 0.214916 | TRIM56/ST  | 5  |
| GO:00215:pallium devel    | 6/272  | 169/18670 | 0.037615 | 0.25077  | 0.21632  | TACC3/CDI  | 6  |
| GO:00308:regulation of :  | 3/272  | 51/18670  | 0.038144 | 0.253525 | 0.218697 | F2RL1/LMO  | 3  |
| GO:00140:positive regul:  | 4/272  | 87/18670  | 0.038324 | 0.253525 | 0.218697 | NKX3-1/F2  | 4  |
| GO:00436:regulation of I  | 5/272  | 127/18670 | 0.038387 | 0.253525 | 0.218697 | RPS6KA3/F  | 5  |
| GO:00457:positive regul:  | 5/272  | 127/18670 | 0.038387 | 0.253525 | 0.218697 | CDC123/TH  | 5  |
| GO:00468:positive regul:  | 5/272  | 127/18670 | 0.038387 | 0.253525 | 0.218697 | NKX3-1/PF  | 5  |
| GO:00421:B cell activatic | 9/272  | 310/18670 | 0.038482 | 0.253681 | 0.218831 | PPP2R3C/I  | 9  |
| GO:00000:cell cycle chec  | 7/272  | 216/18670 | 0.039307 | 0.254522 | 0.219557 | ARID3A/GA  | 7  |
| GO:00436:post-translatic  | 10/272 | 361/18670 | 0.039452 | 0.254522 | 0.219557 | WSB1/PTP   | 10 |
| GO:00326:type I interfer  | 5/272  | 128/18670 | 0.039492 | 0.254522 | 0.219557 | TRIM56/ST  | 5  |
| GO:00347:negative regul   | 5/272  | 128/18670 | 0.039492 | 0.254522 | 0.219557 | THBS1/RG:  | 5  |
| GO:20001:regulation of r  | 4/272  | 88/18670  | 0.039706 | 0.254522 | 0.219557 | RAPGEF1/I  | 4  |
| GO:00069:cellular defen:  | 3/272  | 52/18670  | 0.040057 | 0.254522 | 0.219557 | MNDA/LY9   | 3  |
| GO:00327:positive regul:  | 3/272  | 52/18670  | 0.040057 | 0.254522 | 0.219557 | MNDA/CLE   | 3  |
| GO:00514:regulation of :  | 3/272  | 52/18670  | 0.040057 | 0.254522 | 0.219557 | GOLGA2/R   | 3  |
| GO:00100:response to m    | 10/272 | 362/18670 | 0.040075 | 0.254522 | 0.219557 | PTGS2/THI  | 10 |
| GO:00313:positive regul:  | 10/272 | 362/18670 | 0.040075 | 0.254522 | 0.219557 | TOB1/PFKI  | 10 |
| GO:00362:cellular respor  | 7/272  | 217/18670 | 0.040135 | 0.254522 | 0.219557 | NKX3-1/PT  | 7  |
| GO:00030:glomerular filt  | 2/272  | 22/18670  | 0.040335 | 0.254522 | 0.219557 | SULF2/F2R  | 2  |
| GO:00059:glycogen catal   | 2/272  | 22/18670  | 0.040335 | 0.254522 | 0.219557 | PYGL/PPP1  | 2  |
| GO:00198:antigen proce:   | 2/272  | 22/18670  | 0.040335 | 0.254522 | 0.219557 | B2M/TAP2   | 2  |
| GO:00329:regulation of :  | 2/272  | 22/18670  | 0.040335 | 0.254522 | 0.219557 | F2RL1/CLE  | 2  |
| GO:00346:establishment    | 2/272  | 22/18670  | 0.040335 | 0.254522 | 0.219557 | KIF1B/HIF1 | 2  |
| GO:00400:negative regul   | 2/272  | 22/18670  | 0.040335 | 0.254522 | 0.219557 | SULF2/THE  | 2  |
| GO:00420:interleukin-2 :  | 2/272  | 22/18670  | 0.040335 | 0.254522 | 0.219557 | CLEC7A/IL: | 2  |
| GO:00456:positive regul:  | 2/272  | 22/18670  | 0.040335 | 0.254522 | 0.219557 | IL4R/IL18  | 2  |
| GO:00474:mitochondri      | 2/272  | 22/18670  | 0.040335 | 0.254522 | 0.219557 | KIF1B/HIF1 | 2  |
| GO:00603:regulation of :  | 2/272  | 22/18670  | 0.040335 | 0.254522 | 0.219557 | TOB1/PBLI  | 2  |
| GO:00903:positive regul:  | 2/272  | 22/18670  | 0.040335 | 0.254522 | 0.219557 | JDP2/LRRK  | 2  |
| GO:19017:positive regul:  | 2/272  | 22/18670  | 0.040335 | 0.254522 | 0.219557 | RPL26/RPL  | 2  |
| GO:19046:regulation of :  | 2/272  | 22/18670  | 0.040335 | 0.254522 | 0.219557 | GOLGA2/R   | 2  |
| GO:00714:cellular respor  | 5/272  | 129/18670 | 0.040616 | 0.255839 | 0.220693 | RGR/PTGS:  | 5  |
| GO:00301:regulation of \  | 10/272 | 363/18670 | 0.040705 | 0.25594  | 0.22078  | SULF2/RAF  | 10 |
| GO:00092:ribonucleotide   | 11/272 | 414/18670 | 0.040873 | 0.256544 | 0.221301 | DLD/PDE7,  | 11 |
| GO:00322:regulation of :  | 7/272  | 218/18670 | 0.040974 | 0.256722 | 0.221454 | PFN2/GMF   | 7  |
| GO:00016:temperature :    | 6/272  | 173/18670 | 0.041385 | 0.258837 | 0.223278 | GADD45G,   | 6  |
| GO:00448:cell cycle G2/   | 8/272  | 266/18670 | 0.041627 | 0.259893 | 0.22419  | PSMD12/C   | 8  |
| GO:00506:positive regul:  | 5/272  | 130/18670 | 0.04176  | 0.260264 | 0.224509 | TNFSF13B/  | 5  |
| GO:00316:zymogen activ    | 3/272  | 53/18670  | 0.042018 | 0.260496 | 0.22471  | PLAU/THB:  | 3  |
| GO:00702:regulation of I  | 3/272  | 53/18670  | 0.042018 | 0.260496 | 0.22471  | FADD/HIF1  | 3  |
| GO:00713:cellular respor  | 3/272  | 53/18670  | 0.042018 | 0.260496 | 0.22471  | RAPGEF1/I  | 3  |
| GO:00423:negative regul   | 12/272 | 468/18670 | 0.042211 | 0.261089 | 0.225222 | PAK2/SH3I  | 12 |
| GO:19019:negative regul   | 8/272  | 267/18670 | 0.042396 | 0.261089 | 0.225222 | ARID3A/PS  | 8  |
| GO:19030:negative regul   | 4/272  | 90/18670  | 0.042556 | 0.261089 | 0.225222 | PLAU/THB:  | 4  |
| GO:00329:positive regul:  | 5/272  | 131/18670 | 0.042923 | 0.261089 | 0.225222 | TNFSF13B/  | 5  |

|                                                                               |           |          |          |          |                  |    |
|-------------------------------------------------------------------------------|-----------|----------|----------|----------|------------------|----|
| GO:19028: negative regulation of cell growth                                  | 131/18670 | 0.042923 | 0.261089 | 0.225222 | ARID3A/GATA1     | 5  |
| GO:00024: antigen presentation                                                | 175/18670 | 0.043356 | 0.261089 | 0.225222 | PSMD12/B2M       | 6  |
| GO:00109: regulation of cell growth                                           | 175/18670 | 0.043356 | 0.261089 | 0.225222 | PPP2R3A/PPP2R3B  | 6  |
| GO:00092: glucan catabolic process                                            | 23/18670  | 0.043761 | 0.261089 | 0.225222 | PYGL/PPP1        | 2  |
| GO:00104: proteasomal catabolic process                                       | 23/18670  | 0.043761 | 0.261089 | 0.225222 | PSMA1/PSMA2      | 2  |
| GO:00165: histone deubiquitination                                            | 23/18670  | 0.043761 | 0.261089 | 0.225222 | USP15/USP14      | 2  |
| GO:00355: regulation of cell growth                                           | 23/18670  | 0.043761 | 0.261089 | 0.225222 | DTX3L/BTBD9      | 2  |
| GO:00458: positive regulation of cell growth                                  | 23/18670  | 0.043761 | 0.261089 | 0.225222 | PFKFB2/HNF1B     | 2  |
| GO:00897: amino acid import                                                   | 23/18670  | 0.043761 | 0.261089 | 0.225222 | RGS2/SLC3A2      | 2  |
| GO:00972: renal filtration                                                    | 23/18670  | 0.043761 | 0.261089 | 0.225222 | SULF2/F2R        | 2  |
| GO:19010: negative regulation of cell growth                                  | 23/18670  | 0.043761 | 0.261089 | 0.225222 | TXN/LRRK2        | 2  |
| GO:19032: negative regulation of cell growth                                  | 23/18670  | 0.043761 | 0.261089 | 0.225222 | TXN/LRRK2        | 2  |
| GO:19034: regulation of cell growth                                           | 23/18670  | 0.043761 | 0.261089 | 0.225222 | CLEC7A/LRWD1     | 2  |
| GO:00456: positive regulation of cell growth                                  | 91/18670  | 0.044023 | 0.261089 | 0.225222 | STAT1/FAC1       | 4  |
| GO:00518: membrane development                                                | 91/18670  | 0.044023 | 0.261089 | 0.225222 | PPP2R3C/CDC20    | 4  |
| GO:00603: interferon-gamma response                                           | 91/18670  | 0.044023 | 0.261089 | 0.225222 | IFNGR1/STAT1     | 4  |
| GO:00027: positive regulation of cell growth                                  | 54/18670  | 0.044026 | 0.261089 | 0.225222 | F2RL1/B2M        | 3  |
| GO:00300: actin filament organization                                         | 54/18670  | 0.044026 | 0.261089 | 0.225222 | F2RL1/LMO1       | 3  |
| GO:00326: regulation of insulin-like growth factor receptor signaling pathway | 54/18670  | 0.044026 | 0.261089 | 0.225222 | THBS1/CLEVER4    | 3  |
| GO:00353: thioester biosynthesis                                              | 54/18670  | 0.044026 | 0.261089 | 0.225222 | DLD/ACSL1        | 3  |
| GO:00716: acyl-CoA biosynthesis                                               | 54/18670  | 0.044026 | 0.261089 | 0.225222 | DLD/ACSL1        | 3  |
| GO:00061: nucleoside diphosphate metabolic process                            | 132/18670 | 0.044105 | 0.261089 | 0.225222 | PFKFB2/HNF1B     | 5  |
| GO:00432: positive regulation of cell growth                                  | 132/18670 | 0.044105 | 0.261089 | 0.225222 | NKX3-1/CLIP1     | 5  |
| GO:00706: regulation of insulin-like growth factor receptor signaling pathway | 222/18670 | 0.044445 | 0.262661 | 0.226577 | MNDA/TNFRSF25    | 7  |
| GO:00068: neurotransmission                                                   | 270/18670 | 0.044762 | 0.264094 | 0.227813 | ICA1/PFN2        | 8  |
| GO:00310: microtubule organization                                            | 133/18670 | 0.045307 | 0.265555 | 0.229074 | GADD45A/PPP2R3B  | 5  |
| GO:00550: transition metal ion transport                                      | 133/18670 | 0.045307 | 0.265555 | 0.229074 | S100A9/B2M       | 5  |
| GO:00713: cellular response to hypoxia                                        | 133/18670 | 0.045307 | 0.265555 | 0.229074 | PTPRN2/HIF1A     | 5  |
| GO:00019: regulation of cell growth                                           | 177/18670 | 0.045384 | 0.265555 | 0.229074 | F2RL1/IFNGR1     | 6  |
| GO:00484: cell maturation                                                     | 177/18670 | 0.045384 | 0.265555 | 0.229074 | DLD/ROPN1        | 6  |
| GO:00165: covalent chromatin organization                                     | 474/18670 | 0.045711 | 0.267    | 0.23032  | RPS6KA5/USP1     | 12 |
| GO:00326: interleukin-10 signaling pathway                                    | 55/18670  | 0.046082 | 0.267    | 0.23032  | F2RL1/CLEVER4    | 3  |
| GO:00430: regulation of insulin-like growth factor receptor signaling pathway | 55/18670  | 0.046082 | 0.267    | 0.23032  | THBS1/IL4I1      | 3  |
| GO:00974: synaptic vesicle transport                                          | 55/18670  | 0.046082 | 0.267    | 0.23032  | LRRK2/PIC1       | 3  |
| GO:00109: positive regulation of cell growth                                  | 178/18670 | 0.046421 | 0.267    | 0.23032  | NKX3-1/CLIP1     | 6  |
| GO:00091: purine nucleoside metabolic process                                 | 134/18670 | 0.046528 | 0.267    | 0.23032  | PFKFB2/HNF1B     | 5  |
| GO:00091: purine ribonucleoside metabolic process                             | 134/18670 | 0.046528 | 0.267    | 0.23032  | PFKFB2/HNF1B     | 5  |
| GO:00322: positive regulation of cell growth                                  | 134/18670 | 0.046528 | 0.267    | 0.23032  | PFN2/GMFB        | 5  |
| GO:00466: response to oxidative stress                                        | 134/18670 | 0.046528 | 0.267    | 0.23032  | PTGS2/RAI1       | 5  |
| GO:00469: nucleotide phosphorylation                                          | 134/18670 | 0.046528 | 0.267    | 0.23032  | PFKFB2/HNF1B     | 5  |
| GO:00342: regulation of cell growth                                           | 476/18670 | 0.046921 | 0.267    | 0.23032  | RPS6KA3/CDC20    | 12 |
| GO:00064: protein deacetylation                                               | 93/18670  | 0.047042 | 0.267    | 0.23032  | SAP30/JDP        | 4  |
| GO:00352: synaptic transmission                                               | 93/18670  | 0.047042 | 0.267    | 0.23032  | PTGS2/RAI1       | 4  |
| GO:00622: regulation of insulin-like growth factor receptor signaling pathway | 93/18670  | 0.047042 | 0.267    | 0.23032  | F2RL1/LY9        | 4  |
| GO:00456: negative regulation of cell growth                                  | 225/18670 | 0.047168 | 0.267    | 0.23032  | KIAA0319/PPP2R3B | 7  |
| GO:00108: negative regulation of cell growth                                  | 24/18670  | 0.047291 | 0.267    | 0.23032  | F2RL1/RFF        | 2  |
| GO:00360: protein localization                                                | 24/18670  | 0.047291 | 0.267    | 0.23032  | DTX3L/RAI1       | 2  |
| GO:00421: positive regulation of cell growth                                  | 24/18670  | 0.047291 | 0.267    | 0.23032  | FADD/IL18        | 2  |

|                            |        |           |          |          |          |            |    |
|----------------------------|--------|-----------|----------|----------|----------|------------|----|
| GO:00428: defense respo    | 2/272  | 24/18670  | 0.047291 | 0.267    | 0.23032  | IL4R/CLEC  | 2  |
| GO:00433: positive regul   | 2/272  | 24/18670  | 0.047291 | 0.267    | 0.23032  | F2RL1/IL4F | 2  |
| GO:00468: carbohydrate     | 2/272  | 24/18670  | 0.047291 | 0.267    | 0.23032  | PFKFB2/HK  | 2  |
| GO:19001: negative regul   | 2/272  | 24/18670  | 0.047291 | 0.267    | 0.23032  | PAK2/RFFL  | 2  |
| GO:00301: positive regul   | 6/272  | 179/18670 | 0.047472 | 0.267594 | 0.230833 | SULF2/PSM  | 6  |
| GO:00098: positive regul   | 11/272 | 425/18670 | 0.047739 | 0.268411 | 0.231537 | TOB1/PFKF  | 11 |
| GO:00713: cellular respo   | 5/272  | 135/18670 | 0.047768 | 0.268411 | 0.231537 | PTPRN2/H   | 5  |
| GO:00019: positive regul   | 3/272  | 56/18670  | 0.048184 | 0.26904  | 0.23208  | F2RL1/B2M  | 3  |
| GO:00326: interleukin-12   | 3/272  | 56/18670  | 0.048184 | 0.26904  | 0.23208  | THBS1/CLE  | 3  |
| GO:00709: protein K48-li   | 3/272  | 56/18670  | 0.048184 | 0.26904  | 0.23208  | UBE2D3/R   | 3  |
| GO:19032: negative regul   | 3/272  | 56/18670  | 0.048184 | 0.26904  | 0.23208  | TXN/HIF1A  | 3  |
| GO:19017: regulation of    | 6/272  | 180/18670 | 0.048537 | 0.270585 | 0.233412 | TAF15/CDI  | 6  |
| GO:00091: ribonucleosid    | 5/272  | 136/18670 | 0.049028 | 0.272463 | 0.235033 | PFKFB2/HK  | 5  |
| GO:00713: cellular respo   | 5/272  | 136/18670 | 0.049028 | 0.272463 | 0.235033 | PTPRN2/H   | 5  |
| GO:19019: regulation of    | 12/272 | 480/18670 | 0.049407 | 0.274141 | 0.236481 | ARID3A/PS  | 12 |
| GO:00511: regulation of    | 6/272  | 181/18670 | 0.049617 | 0.274784 | 0.237034 | SCGB3A1/I  | 6  |
| GO:00603: type I interfer  | 4/272  | 95/18670  | 0.050173 | 0.274784 | 0.237034 | IFI6/STAT1 | 4  |
| GO:00713: cellular respo   | 4/272  | 95/18670  | 0.050173 | 0.274784 | 0.237034 | IFI6/STAT1 | 4  |
| GO:00607: positive regul   | 3/272  | 57/18670  | 0.050333 | 0.274784 | 0.237034 | FADD/HIF1  | 3  |
| GO:19004: negative regul   | 3/272  | 57/18670  | 0.050333 | 0.274784 | 0.237034 | TXN/HIF1A  | 3  |
| GO:19034: positive regul   | 3/272  | 57/18670  | 0.050333 | 0.274784 | 0.237034 | PTGS2/CLE  | 3  |
| GO:00198: antigen proce    | 6/272  | 182/18670 | 0.050712 | 0.274784 | 0.237034 | PSMD12/B   | 6  |
| GO:00300: actin filament   | 6/272  | 182/18670 | 0.050712 | 0.274784 | 0.237034 | PFN2/GMF   | 6  |
| GO:00015: response to pi   | 2/272  | 25/18670  | 0.05092  | 0.274784 | 0.237034 | IL4R/CLEC  | 2  |
| GO:00020: positive regul   | 2/272  | 25/18670  | 0.05092  | 0.274784 | 0.237034 | STAT1/IRS  | 2  |
| GO:00316: plasminogen      | 2/272  | 25/18670  | 0.05092  | 0.274784 | 0.237034 | PLAU/THB   | 2  |
| GO:00326: interleukin-13   | 2/272  | 25/18670  | 0.05092  | 0.274784 | 0.237034 | IL17RA/IL1 | 2  |
| GO:00353: long-chain fat   | 2/272  | 25/18670  | 0.05092  | 0.274784 | 0.237034 | ACSL1/HSC  | 2  |
| GO:00442: cellular polysa  | 2/272  | 25/18670  | 0.05092  | 0.274784 | 0.237034 | PYGL/PPP1  | 2  |
| GO:00516: establishment    | 2/272  | 25/18670  | 0.05092  | 0.274784 | 0.237034 | KIF1B/HIF1 | 2  |
| GO:00519: negative regul   | 2/272  | 25/18670  | 0.05092  | 0.274784 | 0.237034 | RGS2/ABA   | 2  |
| GO:00603: regulation of    | 2/272  | 25/18670  | 0.05092  | 0.274784 | 0.237034 | IFNGR1/ST  | 2  |
| GO:00603: regulation of    | 2/272  | 25/18670  | 0.05092  | 0.274784 | 0.237034 | IFNGR1/ST  | 2  |
| GO:00105: regulation of    | 9/272  | 328/18670 | 0.051657 | 0.277734 | 0.239579 | USP10/EXC  | 9  |
| GO:00068: dicarboxylic ac  | 4/272  | 96/18670  | 0.051781 | 0.277734 | 0.239579 | FOLR3/RAI  | 4  |
| GO:00327: positive regul   | 4/272  | 96/18670  | 0.051781 | 0.277734 | 0.239579 | F2RL1/CLE  | 4  |
| GO:00902: positive regul   | 4/272  | 96/18670  | 0.051781 | 0.277734 | 0.239579 | PFKFB2/HI  | 4  |
| GO:00061: purine nucleo    | 11/272 | 432/18670 | 0.052496 | 0.280462 | 0.241933 | DLD/PDE7   | 11 |
| GO:00619: glial cell activ | 3/272  | 58/18670  | 0.052527 | 0.280462 | 0.241933 | IFNGR1/TL  | 3  |
| GO:19020: regulation of    | 3/272  | 58/18670  | 0.052527 | 0.280462 | 0.241933 | THBS1/RFF  | 3  |
| GO:00027: regulation of    | 5/272  | 139/18670 | 0.052925 | 0.281735 | 0.243031 | F2RL1/IL4F | 5  |
| GO:00706: positive regul   | 5/272  | 139/18670 | 0.052925 | 0.281735 | 0.243031 | TNFSF13B/  | 5  |
| GO:00515: response to c    | 4/272  | 97/18670  | 0.053416 | 0.283499 | 0.244552 | RAPGEF1/   | 4  |
| GO:01201: positive regul   | 4/272  | 97/18670  | 0.053416 | 0.283499 | 0.244552 | GADD45G/   | 4  |
| GO:00716: anatomical str   | 7/272  | 232/18670 | 0.053932 | 0.285532 | 0.246307 | DLD/ROPN   | 7  |
| GO:00463: regulation of    | 6/272  | 185/18670 | 0.054085 | 0.285532 | 0.246307 | GADD45G/   | 6  |
| GO:00019: positive regul   | 2/272  | 26/18670  | 0.054647 | 0.285532 | 0.246307 | B2M/FADL   | 2  |
| GO:00030: regulation of    | 2/272  | 26/18670  | 0.054647 | 0.285532 | 0.246307 | F2RL1/MV   | 2  |

|                                                 |           |          |          |          |              |    |
|-------------------------------------------------|-----------|----------|----------|----------|--------------|----|
| GO:003564: exploration behavior                 | 26/18670  | 0.054647 | 0.285532 | 0.246307 | LRRK2/ABAF1  | 2  |
| GO:004305: amino acid import                    | 26/18670  | 0.054647 | 0.285532 | 0.246307 | RGS2/SLC3A2  | 2  |
| GO:190247: regulation of cytokinesis            | 26/18670  | 0.054647 | 0.285532 | 0.246307 | RAP1A/NPLOC1 | 2  |
| GO:0001838: release of cytokines                | 59/18670  | 0.054767 | 0.285532 | 0.246307 | IFI6/PLAUF   | 3  |
| GO:0001839: endothelial cell adhesion           | 59/18670  | 0.054767 | 0.285532 | 0.246307 | F2RL1/RAFD1  | 3  |
| GO:003273: positive regulation of cytokinesis   | 59/18670  | 0.054767 | 0.285532 | 0.246307 | MNDA/CLEC4E  | 3  |
| GO:004333: positive regulation of cytokinesis   | 59/18670  | 0.054767 | 0.285532 | 0.246307 | TXN/PLAUF    | 3  |
| GO:190288: negative regulation of cytokinesis   | 59/18670  | 0.054767 | 0.285532 | 0.246307 | TXN/HIF1A    | 3  |
| GO:003134: regulation of cell cycle             | 98/18670  | 0.05508  | 0.286738 | 0.247346 | F2RL1/CLEC4E | 4  |
| GO:005086: modulation of cell cycle             | 436/18670 | 0.055353 | 0.287739 | 0.24821  | NTNG2/PTEN   | 11 |
| GO:007145: cellular response to hypoxia         | 234/18670 | 0.05597  | 0.290256 | 0.250381 | NKX3-1/PTEN  | 7  |
| GO:005125: protein polymerization               | 283/18670 | 0.056007 | 0.290256 | 0.250381 | PFN2/GMF     | 8  |
| GO:009917: regulation of transcription          | 437/18670 | 0.056083 | 0.290256 | 0.250381 | NTNG2/PTEN   | 11 |
| GO:003083: positive regulation of transcription | 99/18670  | 0.056771 | 0.291858 | 0.251764 | PFN2/GMF     | 4  |
| GO:190157: fatty acid derivative biosynthesis   | 99/18670  | 0.056771 | 0.291858 | 0.251764 | PTGS2/ACAC1  | 4  |
| GO:002176: development of dendrite              | 284/18670 | 0.05694  | 0.291858 | 0.251764 | DLD/ROPN1    | 8  |
| GO:003805: Fc-gamma receptor signaling          | 142/18670 | 0.056997 | 0.291858 | 0.251764 | CLEC4D/RAFD1 | 5  |
| GO:005087: positive regulation of transcription | 142/18670 | 0.056997 | 0.291858 | 0.251764 | PPP2R3C/PTEN | 5  |
| GO:190296: negative regulation of transcription | 142/18670 | 0.056997 | 0.291858 | 0.251764 | PFN2/GMF     | 5  |
| GO:004673: protein autophagy                    | 235/18670 | 0.057007 | 0.291858 | 0.251764 | PAK2/CLK4    | 7  |
| GO:003253: negative regulation of transcription | 60/18670  | 0.057053 | 0.291858 | 0.251764 | LMTK2/PHF19  | 3  |
| GO:006007: canonical Wnt signaling              | 335/18670 | 0.057495 | 0.293695 | 0.253348 | SULF2/RAFD1  | 9  |
| GO:007123: cellular response to hypoxia         | 236/18670 | 0.058056 | 0.294108 | 0.253704 | CLEC7A/LY86  | 7  |
| GO:004883: dendrite morphogenesis               | 143/18670 | 0.058393 | 0.294108 | 0.253704 | CDK5R1/PI3K  | 5  |
| GO:000027: polysaccharide biosynthesis          | 27/18670  | 0.058466 | 0.294108 | 0.253704 | PYGL/PPP1    | 2  |
| GO:000283: regulation of transcription          | 27/18670  | 0.058466 | 0.294108 | 0.253704 | IL4R/IL18    | 2  |
| GO:004593: negative regulation of transcription | 27/18670  | 0.058466 | 0.294108 | 0.253704 | PTGS2/RGK1   | 2  |
| GO:004826: negative regulation of transcription | 27/18670  | 0.058466 | 0.294108 | 0.253704 | UNC119/P     | 2  |
| GO:006014: positive regulation of transcription | 27/18670  | 0.058466 | 0.294108 | 0.253704 | SCGB3A1/IL4R | 2  |
| GO:006033: innervation                          | 27/18670  | 0.058466 | 0.294108 | 0.253704 | SULF2/CHIT1  | 2  |
| GO:200015: regulation of transcription          | 27/18670  | 0.058466 | 0.294108 | 0.253704 | THBS1/IRS1   | 2  |
| GO:200103: negative regulation of transcription | 27/18670  | 0.058466 | 0.294108 | 0.253704 | TXN/LRRK2    | 2  |
| GO:000215: cytoplasmic transport                | 100/18670 | 0.058489 | 0.294108 | 0.253704 | RPS28/RPS27  | 4  |
| GO:004806: antigen processing                   | 189/18670 | 0.05879  | 0.29483  | 0.254327 | PSMD12/B     | 6  |
| GO:003287: regulation of transcription          | 237/18670 | 0.059116 | 0.29483  | 0.254327 | GADD45G/PTEN | 7  |
| GO:004312: regulation of transcription          | 237/18670 | 0.059116 | 0.29483  | 0.254327 | F2RL1/STAB1  | 7  |
| GO:000715: leukocyte cell-cell adhesion         | 337/18670 | 0.059238 | 0.29483  | 0.254327 | PAK2/SIRP    | 9  |
| GO:004346: regulation of transcription          | 337/18670 | 0.059238 | 0.29483  | 0.254327 | GADD45G/PTEN | 9  |
| GO:000225: alpha-beta T cell activation         | 61/18670  | 0.059382 | 0.29483  | 0.254327 | IL4R/EOM1    | 3  |
| GO:000226: alpha-beta T cell activation         | 61/18670  | 0.059382 | 0.29483  | 0.254327 | IL4R/EOM1    | 3  |
| GO:004512: cellular extravascular matrix        | 61/18670  | 0.059382 | 0.29483  | 0.254327 | GOLPH3/F     | 3  |
| GO:190396: positive regulation of transcription | 61/18670  | 0.059382 | 0.29483  | 0.254327 | SRPK2/IFITM1 | 3  |
| GO:004575: positive regulation of transcription | 389/18670 | 0.05952  | 0.295101 | 0.254561 | NKX3-1/AF    | 10 |
| GO:190216: positive regulation of transcription | 144/18670 | 0.059809 | 0.296119 | 0.255439 | PPP2R3C/PTEN | 5  |
| GO:004594: negative regulation of transcription | 338/18670 | 0.060122 | 0.296654 | 0.2559   | NKX3-1/AF    | 9  |
| GO:003263: interleukin-1 signaling              | 101/18670 | 0.060236 | 0.296654 | 0.2559   | MNDA/F2F     | 4  |
| GO:000697: autophagy                            | 496/18670 | 0.060253 | 0.296654 | 0.2559   | RAB24/S1C    | 12 |
| GO:006193: process utilization                  | 496/18670 | 0.060253 | 0.296654 | 0.2559   | RAB24/S1C    | 12 |

|                           |        |           |          |          |          |            |    |
|---------------------------|--------|-----------|----------|----------|----------|------------|----|
| GO:007147:cellular respor | 6/272  | 191/1867C | 0.061232 | 0.300011 | 0.258796 | RGR/PTGS:  | 6  |
| GO:00076:learning         | 5/272  | 145/1867C | 0.061245 | 0.300011 | 0.258796 | PTGS2/EIF: | 5  |
| GO:00330(muscle cell pr   | 7/272  | 239/1867C | 0.061273 | 0.300011 | 0.258796 | PTGS2/THI  | 7  |
| GO:00703(regulation of s  | 7/272  | 239/1867C | 0.061273 | 0.300011 | 0.258796 | GADD45G,   | 7  |
| GO:00065:regulation of c  | 3/272  | 62/18670  | 0.061756 | 0.301958 | 0.260476 | PSMD12/P   | 3  |
| GO:00023(cytokine prod    | 4/272  | 102/1867C | 0.062009 | 0.30201  | 0.260521 | F2RL1/B2N  | 4  |
| GO:00988(cellular oxidar  | 4/272  | 102/1867C | 0.062009 | 0.30201  | 0.260521 | TXN/PTGS:  | 4  |
| GO:00442(small molecul    | 11/272 | 445/1867C | 0.062156 | 0.30201  | 0.260521 | DLD/UPB1   | 11 |
| GO:00026:regulation of c  | 2/272  | 28/18670  | 0.062374 | 0.30201  | 0.260521 | FADD/BST:  | 2  |
| GO:00354:response to in   | 2/272  | 28/18670  | 0.062374 | 0.30201  | 0.260521 | MNDA/ST/   | 2  |
| GO:00454(regulation of i  | 2/272  | 28/18670  | 0.062374 | 0.30201  | 0.260521 | CLEC7A/TL  | 2  |
| GO:19020(regulation of s  | 2/272  | 28/18670  | 0.062374 | 0.30201  | 0.260521 | IFNGR1/PI  | 2  |
| GO:00509(leukocyte mig    | 12/272 | 499/1867C | 0.06245  | 0.30201  | 0.260521 | F2RL1/THE  | 12 |
| GO:00091(coenzyme bio     | 5/272  | 146/1867C | 0.062699 | 0.302805 | 0.261206 | DLD/PTGS:  | 5  |
| GO:00425:glucose home     | 7/272  | 241/1867C | 0.063478 | 0.306148 | 0.26409  | PYGL/HK2,  | 7  |
| GO:00986:anion transme    | 8/272  | 291/1867C | 0.063749 | 0.306915 | 0.264752 | CLCC1/THE  | 8  |
| GO:00356(protein deacyl   | 4/272  | 103/1867C | 0.063811 | 0.306915 | 0.264752 | SAP30/JDP  | 4  |
| GO:00902(positive regul   | 5/272  | 147/1867C | 0.064174 | 0.308242 | 0.265897 | SULF2/PSN  | 5  |
| GO:00335(carbohydrate     | 7/272  | 242/1867C | 0.064598 | 0.309364 | 0.266864 | PYGL/HK2,  | 7  |
| GO:00069:nucleocytopla    | 9/272  | 343/1867C | 0.064669 | 0.309364 | 0.266864 | TXN/PTGS:  | 9  |
| GO:00329:regulation of s  | 9/272  | 343/1867C | 0.064669 | 0.309364 | 0.266864 | F2RL1/PFN  | 9  |
| GO:00148:muscle cell mi   | 4/272  | 104/1867C | 0.065639 | 0.311913 | 0.269063 | PLAU/BIN3  | 4  |
| GO:00469:regulation of r  | 4/272  | 104/1867C | 0.065639 | 0.311913 | 0.269063 | PFN2/RAB:  | 4  |
| GO:00987:macromolecul     | 4/272  | 104/1867C | 0.065639 | 0.311913 | 0.269063 | SAP30/JDP  | 4  |
| GO:20012:negative regul   | 4/272  | 104/1867C | 0.065639 | 0.311913 | 0.269063 | THBS1/IFI  | 4  |
| GO:00514:negative regul   | 5/272  | 148/1867C | 0.065667 | 0.311913 | 0.269063 | PFN2/GMF   | 5  |
| GO:00092(response to te   | 7/272  | 243/1867C | 0.065731 | 0.311913 | 0.269063 | PTGS2/THI  | 7  |
| GO:00059:regulation of s  | 2/272  | 29/18670  | 0.066369 | 0.312428 | 0.269507 | IRS2/PPP1  | 2  |
| GO:00094:NAD biosynth     | 2/272  | 29/18670  | 0.066369 | 0.312428 | 0.269507 | PTGS2/SLC  | 2  |
| GO:00109:regulation of s  | 2/272  | 29/18670  | 0.066369 | 0.312428 | 0.269507 | IRS2/PPP1  | 2  |
| GO:00310:regulation of l  | 2/272  | 29/18670  | 0.066369 | 0.312428 | 0.269507 | JDP2/LRRK  | 2  |
| GO:00422:interleukin-6    | 2/272  | 29/18670  | 0.066369 | 0.312428 | 0.269507 | CLEC7A/TL  | 2  |
| GO:00601:regulation of s  | 2/272  | 29/18670  | 0.066369 | 0.312428 | 0.269507 | SCGB3A1/I  | 2  |
| GO:00300:lamellipodium    | 3/272  | 64/18670  | 0.066635 | 0.312848 | 0.269869 | BIN3/GOLF  | 3  |
| GO:00357:insulin secreti  | 3/272  | 64/18670  | 0.066635 | 0.312848 | 0.269869 | PTPRN2/H   | 3  |
| GO:00140:response to pi   | 5/272  | 149/1867C | 0.06718  | 0.314158 | 0.271    | PTGS2/RAI  | 5  |
| GO:00507:regulation of c  | 5/272  | 149/1867C | 0.06718  | 0.314158 | 0.271    | KIAA0319/  | 5  |
| GO:20010:positive regul   | 5/272  | 149/1867C | 0.06718  | 0.314158 | 0.271    | NKX3-1/CL  | 5  |
| GO:00027(positive regul   | 4/272  | 105/1867C | 0.067495 | 0.315212 | 0.271909 | EXOSC3/B:  | 4  |
| GO:00103:regulation of c  | 6/272  | 196/1867C | 0.067595 | 0.315267 | 0.271957 | PSMD12/C   | 6  |
| GO:00109:positive regul   | 6/272  | 197/1867C | 0.068913 | 0.319718 | 0.275796 | NKX3-1/CL  | 6  |
| GO:00069:regulation of s  | 3/272  | 65/18670  | 0.069138 | 0.319718 | 0.275796 | PTGS2/RG:  | 3  |
| GO:00327:positive regul   | 3/272  | 65/18670  | 0.069138 | 0.319718 | 0.275796 | CLEC7A/FA  | 3  |
| GO:00353(negative regul   | 3/272  | 65/18670  | 0.069138 | 0.319718 | 0.275796 | LMTK2/PH   | 3  |
| GO:00421:neurotransmit    | 4/272  | 106/1867C | 0.069377 | 0.319718 | 0.275796 | PTGS2/UPI  | 4  |
| GO:20010:regulation of r  | 4/272  | 106/1867C | 0.069377 | 0.319718 | 0.275796 | TXN/RGS2,  | 4  |
| GO:00065:cellular amino   | 9/272  | 348/1867C | 0.06943  | 0.319718 | 0.275796 | DLD/UPB1   | 9  |
| GO:00310:regeneration     | 6/272  | 198/1867C | 0.070245 | 0.319718 | 0.275796 | SULF2/IFRI | 6  |



|                                 |           |          |          |          |            |    |
|---------------------------------|-----------|----------|----------|----------|------------|----|
| GO:00028: regulation of t 2/272 | 30/18670  | 0.070446 | 0.319718 | 0.275796 | IL4R/IL18  | 2  |
| GO:00107: regulation of r 2/272 | 30/18670  | 0.070446 | 0.319718 | 0.275796 | NFKBIA/IL1 | 2  |
| GO:00381: interleukin-7-1 2/272 | 30/18670  | 0.070446 | 0.319718 | 0.275796 | IRS2/BRWI  | 2  |
| GO:00433: positive regul: 2/272 | 30/18670  | 0.070446 | 0.319718 | 0.275796 | IL4R/IL18  | 2  |
| GO:00459: positive regul: 2/272 | 30/18670  | 0.070446 | 0.319718 | 0.275796 | CDC123/EI  | 2  |
| GO:00701: negative regul 2/272  | 30/18670  | 0.070446 | 0.319718 | 0.275796 | SRGN/HIF1  | 2  |
| GO:00900: regulation of r 2/272 | 30/18670  | 0.070446 | 0.319718 | 0.275796 | CAMK1D/E   | 2  |
| GO:00902: positive regul: 2/272 | 30/18670  | 0.070446 | 0.319718 | 0.275796 | PLAUR/MM   | 2  |
| GO:00974: liver regenera 2/272  | 30/18670  | 0.070446 | 0.319718 | 0.275796 | SULF2/RAF  | 2  |
| GO:00990: postsynapse a 2/272   | 30/18670  | 0.070446 | 0.319718 | 0.275796 | NTNG2/CD   | 2  |
| GO:01101: negative regul 2/272  | 30/18670  | 0.070446 | 0.319718 | 0.275796 | SRGN/HIF1  | 2  |
| GO:19018: negative regul 2/272  | 30/18670  | 0.070446 | 0.319718 | 0.275796 | THBS1/TLF  | 2  |
| GO:19032: regulation of l 2/272 | 30/18670  | 0.070446 | 0.319718 | 0.275796 | TXN/LRRK2  | 2  |
| GO:00706: leukocyte prol 8/272  | 298/18670 | 0.071045 | 0.322023 | 0.277784 | MNDA/F2F   | 8  |
| GO:00019: leukocyte me: 4/272   | 107/18670 | 0.071286 | 0.322291 | 0.278016 | F2RL1/B2M  | 4  |
| GO:00485: positive regul: 4/272 | 107/18670 | 0.071286 | 0.322291 | 0.278016 | POLR2J/SR  | 4  |
| GO:00061: regulation of c 6/272 | 199/18670 | 0.071592 | 0.32326  | 0.278851 | PFKFB2/RA  | 6  |
| GO:00065: protein mono: 3/272   | 66/18670  | 0.071684 | 0.323262 | 0.278853 | UBE2D3/TI  | 3  |
| GO:00421: neurotransmit 5/272   | 153/18670 | 0.073425 | 0.330692 | 0.285263 | PTGS2/UPI  | 5  |
| GO:00421: positive regul: 3/272 | 67/18670  | 0.074271 | 0.331778 | 0.286199 | THBS1/CLE  | 3  |
| GO:00422: ribosomal sm: 3/272   | 67/18670  | 0.074271 | 0.331778 | 0.286199 | RPS28/RPS  | 3  |
| GO:00487: muscle fiber d 3/272  | 67/18670  | 0.074271 | 0.331778 | 0.286199 | BIN3/HDAI  | 3  |
| GO:00027: regulation of l 2/272 | 31/18670  | 0.074603 | 0.331778 | 0.286199 | B2M/IL18   | 2  |
| GO:00066: phosphatidyls 2/272   | 31/18670  | 0.074603 | 0.331778 | 0.286199 | MBOAT1/C   | 2  |
| GO:00107: regulation of f 2/272 | 31/18670  | 0.074603 | 0.331778 | 0.286199 | THBS1/RFF  | 2  |
| GO:00190: modulation by 2/272   | 31/18670  | 0.074603 | 0.331778 | 0.286199 | EIF2AK2/EI | 2  |
| GO:00456: positive regul: 2/272 | 31/18670  | 0.074603 | 0.331778 | 0.286199 | STAT1/HIF  | 2  |
| GO:00457: positive regul: 2/272 | 31/18670  | 0.074603 | 0.331778 | 0.286199 | PLAUR/MM   | 2  |
| GO:00506: positive regul: 2/272 | 31/18670  | 0.074603 | 0.331778 | 0.286199 | RBM3/RBM   | 2  |
| GO:00091: nucleoside di: 5/272  | 154/18670 | 0.075034 | 0.333276 | 0.287491 | PFKFB2/HK  | 5  |
| GO:00511: positive regul: 4/272 | 109/18670 | 0.075185 | 0.333529 | 0.28771  | SCGB3A1/I  | 4  |
| GO:00508: positive regul: 6/272 | 202/18670 | 0.075722 | 0.335488 | 0.2894   | PAK2/SIRP  | 6  |
| GO:00338: nucleoside bis 3/272  | 68/18670  | 0.076899 | 0.339431 | 0.292801 | DLD/ACSL1  | 3  |
| GO:00340: ribonucleosid: 3/272  | 68/18670  | 0.076899 | 0.339431 | 0.292801 | DLD/ACSL1  | 3  |
| GO:00340: purine nucleo: 3/272  | 68/18670  | 0.076899 | 0.339431 | 0.292801 | DLD/ACSL1  | 3  |
| GO:00069: smooth muscl 4/272    | 110/18670 | 0.077174 | 0.339798 | 0.293117 | SULF2/PTC  | 4  |
| GO:00335: unsaturated f: 4/272  | 110/18670 | 0.077174 | 0.339798 | 0.293117 | PTGS2/AC   | 4  |
| GO:00725: purine-contair 11/272 | 464/18670 | 0.078262 | 0.342011 | 0.295026 | DLD/PDE7,  | 11 |
| GO:19059: regulation of l 5/272 | 156/18670 | 0.07831  | 0.342011 | 0.295026 | NKX3-1/TH  | 5  |
| GO:00025: myeloid leuko 6/272   | 204/18670 | 0.078549 | 0.342011 | 0.295026 | F2RL1/OSC  | 6  |
| GO:19029: positive regul: 6/272 | 204/18670 | 0.078549 | 0.342011 | 0.295026 | F2RL1/PFN  | 6  |
| GO:00082: estrogen met: 2/272   | 32/18670  | 0.078836 | 0.342011 | 0.295026 | HSD17B11   | 2  |
| GO:00193: nicotinamide 1 2/272  | 32/18670  | 0.078836 | 0.342011 | 0.295026 | PTGS2/SLC  | 2  |
| GO:00193: pyridine nucle 2/272  | 32/18670  | 0.078836 | 0.342011 | 0.295026 | PTGS2/SLC  | 2  |
| GO:00459: positive regul: 2/272 | 32/18670  | 0.078836 | 0.342011 | 0.295026 | PTGS2/AB,  | 2  |
| GO:00469: fatty-acyl-CoA 2/272  | 32/18670  | 0.078836 | 0.342011 | 0.295026 | ACSL1/HSC  | 2  |
| GO:00519: positive regul: 2/272 | 32/18670  | 0.078836 | 0.342011 | 0.295026 | PTGS2/RAI  | 2  |
| GO:00603: face morphog 2/272    | 32/18670  | 0.078836 | 0.342011 | 0.295026 | RAB3GAP1   | 2  |

|                           |        |           |          |          |          |            |    |
|---------------------------|--------|-----------|----------|----------|----------|------------|----|
| GO:19007: positive regul  | 2/272  | 32/18670  | 0.078836 | 0.342011 | 0.295026 | GADD45G/   | 2  |
| GO:00518: protein autol   | 3/272  | 69/18670  | 0.079568 | 0.344341 | 0.297036 | UBE2D3/LI  | 3  |
| GO:00702: lymphocyte a    | 3/272  | 69/18670  | 0.079568 | 0.344341 | 0.297036 | FADD/HIF1  | 3  |
| GO:00027: regulation of l | 6/272  | 205/18670 | 0.079984 | 0.345299 | 0.297863 | F2RL1/IL4F | 6  |
| GO:00158: drug transport  | 6/272  | 205/18670 | 0.079984 | 0.345299 | 0.297863 | LMBRD1/R   | 6  |
| GO:19907: cellular detoxi | 4/272  | 112/18670 | 0.081231 | 0.350254 | 0.302137 | TXN/PTGS:  | 4  |
| GO:00027: regulation of   | 13/272 | 70/18670  | 0.082277 | 0.350388 | 0.302252 | B2M/FADL   | 3  |
| GO:00615: myeloid cell d  | 3/272  | 70/18670  | 0.082277 | 0.350388 | 0.302252 | EVI2B/TLR: | 3  |
| GO:00720: regulation of s | 3/272  | 70/18670  | 0.082277 | 0.350388 | 0.302252 | EIF2AK2/H  | 3  |
| GO:00336: negative regul  | 7/272  | 257/18670 | 0.08284  | 0.350388 | 0.302252 | PAK2/SH3I  | 7  |
| GO:00488: stem cell diffe | 7/272  | 257/18670 | 0.08284  | 0.350388 | 0.302252 | PSMD12/E   | 7  |
| GO:00019: regulation of   | 12/272 | 33/18670  | 0.083143 | 0.350388 | 0.302252 | B2M/FADL   | 2  |
| GO:00028: positive regul  | 2/272  | 33/18670  | 0.083143 | 0.350388 | 0.302252 | F2RL1/IL4F | 2  |
| GO:00104: regulation of r | 2/272  | 33/18670  | 0.083143 | 0.350388 | 0.302252 | STAT1/IRS: | 2  |
| GO:00105: regulation of l | 2/272  | 33/18670  | 0.083143 | 0.350388 | 0.302252 | BIN3/HDAI  | 2  |
| GO:00109: negative regul  | 2/272  | 33/18670  | 0.083143 | 0.350388 | 0.302252 | THBS1/LRF  | 2  |
| GO:00193: pyridine nucle  | 2/272  | 33/18670  | 0.083143 | 0.350388 | 0.302252 | PTGS2/SLC  | 2  |
| GO:00199: cGMP-mediat     | 2/272  | 33/18670  | 0.083143 | 0.350388 | 0.302252 | PRKAR2A/   | 2  |
| GO:00464: nicotinamide i  | 2/272  | 33/18670  | 0.083143 | 0.350388 | 0.302252 | PTGS2/SLC  | 2  |
| GO:00485: spleen develo   | 2/272  | 33/18670  | 0.083143 | 0.350388 | 0.302252 | PPP2R3C/F  | 2  |
| GO:00702: regulation of   | 12/272 | 33/18670  | 0.083143 | 0.350388 | 0.302252 | FADD/HIF1  | 2  |
| GO:00990: postsynaptic s  | 2/272  | 33/18670  | 0.083143 | 0.350388 | 0.302252 | NTNG2/CD   | 2  |
| GO:19011: positive regul  | 2/272  | 33/18670  | 0.083143 | 0.350388 | 0.302252 | PLAUR/MM   | 2  |
| GO:19026: regulation of r | 2/272  | 33/18670  | 0.083143 | 0.350388 | 0.302252 | HIF1A/LRR  | 2  |
| GO:19033: negative regul  | 2/272  | 33/18670  | 0.083143 | 0.350388 | 0.302252 | THBS1/LRF  | 2  |
| GO:00069: muscle contra   | 9/272  | 363/18670 | 0.084998 | 0.35689  | 0.307862 | SULF2/PTC  | 9  |
| GO:00181: peptidyl-tyros  | 9/272  | 363/18670 | 0.084998 | 0.35689  | 0.307862 | PAK2/UNC   | 9  |
| GO:00075: skeletal muscl  | 5/272  | 160/18670 | 0.085088 | 0.35689  | 0.307862 | SAP30/BIN  | 5  |
| GO:00026: regulation of l | 4/272  | 114/18670 | 0.085392 | 0.35689  | 0.307862 | F2RL1/THE  | 4  |
| GO:00066: icosanoid met   | 4/272  | 114/18670 | 0.085392 | 0.35689  | 0.307862 | PTGS2/CYF  | 4  |
| GO:00085: fibroblast gro  | 4/272  | 114/18670 | 0.085392 | 0.35689  | 0.307862 | POLR2J/SU  | 4  |
| GO:00302: erythrocyte di  | 4/272  | 114/18670 | 0.085392 | 0.35689  | 0.307862 | STAT1/B2M  | 4  |
| GO:00171: negative regul  | 6/272  | 209/18670 | 0.085874 | 0.358482 | 0.309235 | TOB1/RBM   | 6  |
| GO:00326: interleukin-6   | 5/272  | 161/18670 | 0.086829 | 0.361877 | 0.312163 | F2RL1/CLE  | 5  |
| GO:00431: proteasome-n    | 10/272 | 419/18670 | 0.087376 | 0.361877 | 0.312163 | UBE2D3/P:  | 10 |
| GO:00326: interleukin-1   | 4/272  | 115/18670 | 0.08751  | 0.361877 | 0.312163 | MNDA/F2F   | 4  |
| GO:19005: regulation of   | 4/272  | 115/18670 | 0.08751  | 0.361877 | 0.312163 | PFKFB2/RA  | 4  |
| GO:00328: positive regul  | 2/272  | 34/18670  | 0.08752  | 0.361877 | 0.312163 | RAB3GAP1   | 2  |
| GO:00331: positive regul  | 2/272  | 34/18670  | 0.08752  | 0.361877 | 0.312163 | RBM3/RBM   | 2  |
| GO:00342: amyloid-beta    | 2/272  | 34/18670  | 0.08752  | 0.361877 | 0.312163 | IFNGR1/PI  | 2  |
| GO:00364: cell death in r | 2/272  | 34/18670  | 0.08752  | 0.361877 | 0.312163 | TXN/LRRK:  | 2  |
| GO:00025: production of   | 3/272  | 72/18670  | 0.087811 | 0.361877 | 0.312163 | IL4R/CLEC: | 3  |
| GO:00508: negative regul  | 3/272  | 72/18670  | 0.087811 | 0.361877 | 0.312163 | PTGS2/RAI  | 3  |
| GO:00511: positive regul  | 3/272  | 72/18670  | 0.087811 | 0.361877 | 0.312163 | SCGB3A1/I  | 3  |
| GO:01100: regulation of   | 7/272  | 261/18670 | 0.088159 | 0.362887 | 0.313034 | F2RL1/PFN  | 7  |
| GO:00182: peptidyl-tyros  | 9/272  | 366/18670 | 0.088344 | 0.363227 | 0.313328 | PAK2/UNC   | 9  |
| GO:00345: protein localiz | 7/272  | 262/18670 | 0.089518 | 0.367332 | 0.316869 | TXN/PTGS:  | 7  |
| GO:00094: response to li  | 8/272  | 314/18670 | 0.089565 | 0.367332 | 0.316869 | RGR/UNC1   | 8  |

|                                  |           |          |          |          |            |    |
|----------------------------------|-----------|----------|----------|----------|------------|----|
| GO:20007: regulation of s 4/272  | 116/18670 | 0.089654 | 0.367332 | 0.316869 | PSMD12/E   | 4  |
| GO:00712: cellular respor 6/272  | 212/18670 | 0.090444 | 0.370072 | 0.319232 | LY96/TLR1  | 6  |
| GO:00311: (animal organ) 3/272   | 73/18670  | 0.090636 | 0.370072 | 0.319232 | SULF2/UPF  | 3  |
| GO:19035: positive regul 3/272   | 73/18670  | 0.090636 | 0.370072 | 0.319232 | F2RL1/PTG  | 3  |
| GO:00310: stress-activate 8/272  | 315/18670 | 0.090808 | 0.370344 | 0.319467 | GADD45G/   | 8  |
| GO:00061: regulation of r 4/272  | 117/18670 | 0.091823 | 0.370754 | 0.31982  | PFKFB2/RA  | 4  |
| GO:00327: positive regul 2/272   | 35/18670  | 0.091964 | 0.370754 | 0.31982  | CLEC7A/TL  | 2  |
| GO:00420: type 2 immun 2/272     | 35/18670  | 0.091964 | 0.370754 | 0.31982  | IL4R/IL18  | 2  |
| GO:00456: regulation of 12/272   | 35/18670  | 0.091964 | 0.370754 | 0.31982  | IL4R/IL18  | 2  |
| GO:00519: positive regul 2/272   | 35/18670  | 0.091964 | 0.370754 | 0.31982  | RAB3GAP1   | 2  |
| GO:00708: regulation of ξ 2/272  | 35/18670  | 0.091964 | 0.370754 | 0.31982  | IRS2/PPP1  | 2  |
| GO:00725: pyridine-cont 2/272    | 35/18670  | 0.091964 | 0.370754 | 0.31982  | PTGS2/SLC  | 2  |
| GO:19029: regulation of ε 2/272  | 35/18670  | 0.091964 | 0.370754 | 0.31982  | IFNGR1/PI  | 2  |
| GO:20007: regulation of ε 2/272  | 35/18670  | 0.091964 | 0.370754 | 0.31982  | RAB3GAP1   | 2  |
| GO:19027: regulation of ς 6/272  | 213/18670 | 0.091996 | 0.370754 | 0.31982  | PSMD12/C   | 6  |
| GO:00519: negative regul 8/272   | 316/18670 | 0.09206  | 0.370754 | 0.31982  | KIAA0319/  | 8  |
| GO:00064: regulation of τ 10/272 | 424/18670 | 0.092677 | 0.372816 | 0.3216   | RPS6KA3/C  | 10 |
| GO:00059: glycogen met 3/272     | 74/18670  | 0.093499 | 0.375097 | 0.323568 | PYGL/IRS2, | 3  |
| GO:00063: rRNA processi 6/272    | 214/18670 | 0.093562 | 0.375097 | 0.323568 | RPS28/RPS  | 6  |
| GO:00072: JNK cascade 6/272      | 214/18670 | 0.093562 | 0.375097 | 0.323568 | GADD45G/   | 6  |
| GO:00070: mitotic cell cy 5/272  | 165/18670 | 0.09398  | 0.37592  | 0.324278 | ARID3A/G/  | 5  |
| GO:00506: negative regul 5/272   | 165/18670 | 0.09398  | 0.37592  | 0.324278 | NKX3-1/TH  | 5  |
| GO:00022: hematopoietic 5/272    | 166/18670 | 0.095814 | 0.380725 | 0.328422 | ACP6/PSM   | 5  |
| GO:00019: regulation of ς 4/272  | 119/18670 | 0.096236 | 0.380725 | 0.328422 | PLAU/THB:  | 4  |
| GO:00071: epidermal gro 4/272    | 119/18670 | 0.096236 | 0.380725 | 0.328422 | RPS6KA5/I  | 4  |
| GO:00060: cellular glucan 3/272  | 75/18670  | 0.096398 | 0.380725 | 0.328422 | PYGL/IRS2, | 3  |
| GO:00440: glucan metab 3/272     | 75/18670  | 0.096398 | 0.380725 | 0.328422 | PYGL/IRS2, | 3  |
| GO:19032: regulation of ς 3/272  | 75/18670  | 0.096398 | 0.380725 | 0.328422 | TXN/HIF1A  | 3  |
| GO:00060: glucose catab 2/272    | 36/18670  | 0.096472 | 0.380725 | 0.328422 | PFKFB2/HK  | 2  |
| GO:00068: cellular zinc io 2/272 | 36/18670  | 0.096472 | 0.380725 | 0.328422 | S100A9/S1  | 2  |
| GO:00327: positive regul 2/272   | 36/18670  | 0.096472 | 0.380725 | 0.328422 | CLEC7A/TL  | 2  |
| GO:00343: Arp2/3 compl 2/272     | 36/18670  | 0.096472 | 0.380725 | 0.328422 | GMFG/ARI   | 2  |
| GO:19026: regulation of r 2/272  | 36/18670  | 0.096472 | 0.380725 | 0.328422 | CAMK1D/E   | 2  |
| GO:20005: positive regul 2/272   | 36/18670  | 0.096472 | 0.380725 | 0.328422 | IL4R/IL18  | 2  |
| GO:00019: negative regul 10/272  | 429/18670 | 0.098167 | 0.386062 | 0.333026 | PAK2/SH3I  | 10 |
| GO:00620: regulation of ε 10/272 | 429/18670 | 0.098167 | 0.386062 | 0.333026 | PTGS2/PFK  | 10 |
| GO:00164: protein proce 6/272    | 217/18670 | 0.098348 | 0.386062 | 0.333026 | PLAU/MM    | 6  |
| GO:00171: regulation of ε 6/272  | 217/18670 | 0.098348 | 0.386062 | 0.333026 | F2RL1/IL4F | 6  |
| GO:00160: synaptic vesicl 4/272  | 120/18670 | 0.098479 | 0.386062 | 0.333026 | PFN2/RAB:  | 4  |
| GO:00987: import across 4/272    | 120/18670 | 0.098479 | 0.386062 | 0.333026 | THBS1/RG:  | 4  |
| GO:00454: cell redox hon 3/272   | 76/18670  | 0.099334 | 0.38867  | 0.335275 | TXN/DLD/I  | 3  |
| GO:00434: protein kinase 7/272   | 269/18670 | 0.099363 | 0.38867  | 0.335275 | TXN/NKX3   | 7  |
| GO:00508: regulation of ε 6/272  | 218/18670 | 0.099972 | 0.389639 | 0.336112 | NTNG2/CD   | 6  |
| GO:19030: positive regul 6/272   | 218/18670 | 0.099972 | 0.389639 | 0.336112 | PAK2/SIRP  | 6  |
| GO:00436: regulation of τ 4/272  | 121/18670 | 0.100746 | 0.389639 | 0.336112 | PSMD12/P   | 4  |
| GO:19035: regulation of ρ 4/272  | 121/18670 | 0.100746 | 0.389639 | 0.336112 | PFKFB2/RA  | 4  |
| GO:00002: nuclear-transc 2/272   | 37/18670  | 0.101042 | 0.389639 | 0.336112 | TOB1/TNR   | 2  |
| GO:00070: centriole repli 2/272  | 37/18670  | 0.101042 | 0.389639 | 0.336112 | CEP152/CE  | 2  |

|                                   |           |          |          |          |            |    |
|-----------------------------------|-----------|----------|----------|----------|------------|----|
| GO:003281: regulation of r 2/272  | 37/18670  | 0.101042 | 0.389639 | 0.336112 | IRS2/PPP1  | 2  |
| GO:003321: response to vi 2/272   | 37/18670  | 0.101042 | 0.389639 | 0.336112 | PTGS2/TRI  | 2  |
| GO:004301: T cell homeos 2/272    | 37/18670  | 0.101042 | 0.389639 | 0.336112 | PPP2R3C/F  | 2  |
| GO:004591: positive regul 2/272   | 37/18670  | 0.101042 | 0.389639 | 0.336112 | PTGS2/IRS  | 2  |
| GO:004601: regulation of r 2/272  | 37/18670  | 0.101042 | 0.389639 | 0.336112 | FADD/IL18  | 2  |
| GO:006021: regulation of r 2/272  | 37/18670  | 0.101042 | 0.389639 | 0.336112 | TACC3/RAI  | 2  |
| GO:006031: head morpho 2/272      | 37/18670  | 0.101042 | 0.389639 | 0.336112 | RAB3GAP1   | 2  |
| GO:006051: skeletal muscl 5/272   | 169/18670 | 0.101423 | 0.390683 | 0.337012 | SAP30/BIN  | 5  |
| GO:000021: nuclear-transc 3/272   | 77/18670  | 0.102305 | 0.392799 | 0.338837 | TOB1/EXO   | 3  |
| GO:005171: interaction wi 3/272   | 77/18670  | 0.102305 | 0.392799 | 0.338837 | F2RL1/CAM  | 3  |
| GO:190121: positive regul 3/272   | 77/18670  | 0.102305 | 0.392799 | 0.338837 | EIF2AK2/TI | 3  |
| GO:003411: erythrocyte h 4/272    | 122/18670 | 0.103038 | 0.395182 | 0.340893 | STAT1/B2M  | 4  |
| GO:000721: neurotransmit 5/272    | 170/18670 | 0.103329 | 0.395442 | 0.341117 | PFN2/PTPF  | 5  |
| GO:009961: signal release 5/272   | 170/18670 | 0.103329 | 0.395442 | 0.341117 | PFN2/PTPF  | 5  |
| GO:000031: RNA splicing, \ 9/272  | 379/18670 | 0.103737 | 0.395453 | 0.341127 | POLR2J/US  | 9  |
| GO:000031: mRNA splicing 9/272    | 379/18670 | 0.103737 | 0.395453 | 0.341127 | POLR2J/US  | 9  |
| GO:004661: lymphocyte pr 7/272    | 272/18670 | 0.103758 | 0.395453 | 0.341127 | MNDA/TN    | 7  |
| GO:001601: vesicle organi 8/272   | 325/18670 | 0.103779 | 0.395453 | 0.341127 | AKTIP/GOL  | 8  |
| GO:000681: lipid transport 9/272  | 380/18670 | 0.104981 | 0.397107 | 0.342554 | NKX3-1/AC  | 9  |
| GO:000661: protein target 10/272  | 435/18670 | 0.105003 | 0.397107 | 0.342554 | RPS28/RPS  | 10 |
| GO:000691: regulation of r 5/272  | 171/18670 | 0.105252 | 0.397107 | 0.342554 | PTGS2/RG   | 5  |
| GO:001061: positive regul 5/272   | 171/18670 | 0.105252 | 0.397107 | 0.342554 | PTGS2/THI  | 5  |
| GO:001621: regulation of r 5/272  | 171/18670 | 0.105252 | 0.397107 | 0.342554 | EXOC8/CD   | 5  |
| GO:000191: regulation of l 3/272  | 78/18670  | 0.105312 | 0.397107 | 0.342554 | F2RL1/B2M  | 3  |
| GO:004201: cytokine biosy 4/272   | 123/18670 | 0.105353 | 0.397107 | 0.342554 | THBS1/CLE  | 4  |
| GO:001091: regulation of r 2/272  | 38/18670  | 0.105671 | 0.397107 | 0.342554 | HEBP2/FAI  | 2  |
| GO:001581: neutral amino 2/272    | 38/18670  | 0.105671 | 0.397107 | 0.342554 | RGS2/SLC3  | 2  |
| GO:004501: early endosom 2/272    | 38/18670  | 0.105671 | 0.397107 | 0.342554 | AKTIP/LMT  | 2  |
| GO:004821: macrophage c 2/272     | 38/18670  | 0.105671 | 0.397107 | 0.342554 | THBS1/CKI  | 2  |
| GO:005161: actin filament 2/272   | 38/18670  | 0.105671 | 0.397107 | 0.342554 | LMOD3/AI   | 2  |
| GO:005501: zinc ion home 2/272    | 38/18670  | 0.105671 | 0.397107 | 0.342554 | S100A9/S1  | 2  |
| GO:004661: response to ar 8/272   | 327/18670 | 0.106491 | 0.399764 | 0.344846 | TXN/STAT1  | 8  |
| GO:003291: mononuclear 7/272      | 274/18670 | 0.106746 | 0.400296 | 0.345304 | MNDA/TN    | 7  |
| GO:003281: positive regul 5/272   | 172/18670 | 0.107193 | 0.401223 | 0.346104 | GADD45G/   | 5  |
| GO:000031: RNA splicing, \ 9/272  | 382/18670 | 0.107494 | 0.401223 | 0.346104 | POLR2J/US  | 9  |
| GO:000861: apoptotic mit 4/272    | 124/18670 | 0.107692 | 0.401223 | 0.346104 | IFI6/PLAUF | 4  |
| GO:001401: regulation of r 4/272  | 124/18670 | 0.107692 | 0.401223 | 0.346104 | NKX3-1/F2  | 4  |
| GO:004211: cytokine meta 4/272    | 124/18670 | 0.107692 | 0.401223 | 0.346104 | THBS1/CLE  | 4  |
| GO:005111: regulation of l 4/272  | 124/18670 | 0.107692 | 0.401223 | 0.346104 | TXN/PLAU   | 4  |
| GO:001901: viral life cycle 8/272 | 328/18670 | 0.107862 | 0.401223 | 0.346104 | SRPK2/IFIT | 8  |
| GO:001601: organic acid c 7/272   | 275/18670 | 0.108257 | 0.401223 | 0.346104 | DLD/BCKD   | 7  |
| GO:004631: carboxylic acic 7/272  | 275/18670 | 0.108257 | 0.401223 | 0.346104 | DLD/BCKD   | 7  |
| GO:000641: regulation of t 3/272  | 79/18670  | 0.108353 | 0.401223 | 0.346104 | CDC123/EI  | 3  |
| GO:004351: positive regul 3/272   | 79/18670  | 0.108353 | 0.401223 | 0.346104 | PTGS2/THI  | 3  |
| GO:004591: positive regul 3/272   | 79/18670  | 0.108353 | 0.401223 | 0.346104 | PFKFB2/HI  | 3  |
| GO:003131: positive regul 9/272   | 383/18670 | 0.108764 | 0.402323 | 0.347053 | F2RL1/RAF  | 9  |
| GO:007031: positive regul 5/272   | 173/18670 | 0.109152 | 0.402743 | 0.347415 | GADD45G/   | 5  |
| GO:009711: extrinsic apop 6/272   | 224/18670 | 0.11001  | 0.402743 | 0.347415 | PAK2/THB   | 6  |

|                                               |           |          |          |          |                 |   |
|-----------------------------------------------|-----------|----------|----------|----------|-----------------|---|
| GO:000680 xenobiotic metabolism               | 125/18670 | 0.110054 | 0.402743 | 0.347415 | ACSL1/NQO1      | 4 |
| GO:003230 regulation of lipid metabolism      | 125/18670 | 0.110054 | 0.402743 | 0.347415 | NKX3-1/TFEB     | 4 |
| GO:001070 fibroblast migration                | 39/18670  | 0.110356 | 0.402743 | 0.347415 | THBS1/RFFL      | 2 |
| GO:003250 cytokinetic process                 | 39/18670  | 0.110356 | 0.402743 | 0.347415 | BIN3/ANXA1      | 2 |
| GO:003350 response to toxic substance         | 39/18670  | 0.110356 | 0.402743 | 0.347415 | NKX3-1/TFEB     | 2 |
| GO:003810 neurotrophin signaling              | 39/18670  | 0.110356 | 0.402743 | 0.347415 | RAPGEF1/IRAK1   | 2 |
| GO:005110 vitamin transport                   | 39/18670  | 0.110356 | 0.402743 | 0.347415 | LMBRD1/FIT1     | 2 |
| GO:007170 membrane association                | 39/18670  | 0.110356 | 0.402743 | 0.347415 | PICALM/CLIP1    | 2 |
| GO:007250 pyridine-containing compound        | 39/18670  | 0.110356 | 0.402743 | 0.347415 | PTGS2/SLC12A1   | 2 |
| GO:007250 maintenance of structure            | 39/18670  | 0.110356 | 0.402743 | 0.347415 | TXN/HK2         | 2 |
| GO:190200 negative regulation of cell growth  | 39/18670  | 0.110356 | 0.402743 | 0.347415 | RFFL/FADD       | 2 |
| GO:003240 response to lipopolysaccharide      | 330/18670 | 0.110633 | 0.402921 | 0.347569 | RPS6KA3/FIT1    | 8 |
| GO:004270 defense response                    | 330/18670 | 0.110633 | 0.402921 | 0.347569 | F2RL1/CLEVER1   | 8 |
| GO:004260 muscle cell differentiation         | 385/18670 | 0.111327 | 0.405035 | 0.349392 | IFRD1/SCG2      | 9 |
| GO:001600 rRNA metabolism                     | 225/18670 | 0.111732 | 0.40609  | 0.350302 | RPS28/RPS27A    | 6 |
| GO:000180 kidney development                  | 278/18670 | 0.112858 | 0.409763 | 0.353471 | NKX3-1/SLIT1    | 7 |
| GO:001610 endosomal transport                 | 226/18670 | 0.113467 | 0.410711 | 0.354288 | CLTCL1/LMN1     | 6 |
| GO:003420 negative regulation of cell growth  | 226/18670 | 0.113467 | 0.410711 | 0.354288 | TOB1/RBIV       | 6 |
| GO:005140 positive regulation of cell growth  | 226/18670 | 0.113467 | 0.410711 | 0.354288 | F2RL1/PFN1      | 6 |
| GO:003110 anaphase-promoting complex activity | 81/18670  | 0.114536 | 0.410811 | 0.354375 | PSMD12/PAN1     | 3 |
| GO:005500 iron ion homeostasis                | 81/18670  | 0.114536 | 0.410811 | 0.354375 | B2M/HIF1A       | 3 |
| GO:190350 regulation of protein transport     | 81/18670  | 0.114536 | 0.410811 | 0.354375 | UBE2D3/CDC20    | 3 |
| GO:000190 regulation of cell growth           | 40/18670  | 0.115095 | 0.410811 | 0.354375 | F2RL1/MMR1      | 2 |
| GO:000230 T cell cytokine production          | 40/18670  | 0.115095 | 0.410811 | 0.354375 | B2M/IL18        | 2 |
| GO:000760 mating                              | 40/18670  | 0.115095 | 0.410811 | 0.354375 | HDAC4/ABT1      | 2 |
| GO:004400 modulation of synaptic transmission | 40/18670  | 0.115095 | 0.410811 | 0.354375 | EIF2AK2/EIF2AK3 | 2 |
| GO:007140 cellular response                   | 40/18670  | 0.115095 | 0.410811 | 0.354375 | PTGS2/RCS1      | 2 |
| GO:007250 clathrin-dependent transport        | 40/18670  | 0.115095 | 0.410811 | 0.354375 | UNC119/PAN1     | 2 |
| GO:009850 centriole assembly                  | 40/18670  | 0.115095 | 0.410811 | 0.354375 | CEP152/CEP350   | 2 |
| GO:009870 response to injury                  | 40/18670  | 0.115095 | 0.410811 | 0.354375 | IRS2/BRWI       | 2 |
| GO:009870 cellular response                   | 40/18670  | 0.115095 | 0.410811 | 0.354375 | IRS2/BRWI       | 2 |
| GO:005180 positive regulation of cell growth  | 176/18670 | 0.115132 | 0.410811 | 0.354375 | TXN/THBS1       | 5 |
| GO:005080 regulation of cell growth           | 227/18670 | 0.115217 | 0.410811 | 0.354375 | NTNG2/CD44      | 6 |
| GO:003290 regulation of cell growth           | 388/18670 | 0.115236 | 0.410811 | 0.354375 | F2RL1/PFN1      | 9 |
| GO:000690 striated muscle cell growth         | 177/18670 | 0.117159 | 0.415997 | 0.358849 | RGS2/TNNI3      | 5 |
| GO:000740 synapse assembly                    | 177/18670 | 0.117159 | 0.415997 | 0.358849 | NTNG2/TLL1      | 5 |
| GO:004340 regulation of cell growth           | 177/18670 | 0.117159 | 0.415997 | 0.358849 | PSMD12/E1A      | 5 |
| GO:000250 platelet degradation                | 128/18670 | 0.117278 | 0.415997 | 0.358849 | THBS1/ORI1      | 4 |
| GO:000260 positive regulation of cell growth  | 128/18670 | 0.117278 | 0.415997 | 0.358849 | F2RL1/THE1      | 4 |
| GO:001090 positive regulation of cell growth  | 281/18670 | 0.117562 | 0.416159 | 0.358988 | RAPGEF1/IRAK1   | 7 |
| GO:001690 protein sumoylation                 | 82/18670  | 0.117677 | 0.416159 | 0.358988 | RAE1/HDA1       | 3 |
| GO:004620 nitric oxide metabolism             | 82/18670  | 0.117677 | 0.416159 | 0.358988 | PTGS2/CLEVER1   | 3 |
| GO:004420 cellular carbohydrate transport     | 282/18670 | 0.119152 | 0.417298 | 0.35997  | PFKFB2/PYK2     | 7 |
| GO:004410 cellular amine transport            | 129/18670 | 0.119731 | 0.417298 | 0.35997  | PSMD12/PAN1     | 4 |
| GO:000750 myoblast fusion                     | 41/18670  | 0.119885 | 0.417298 | 0.35997  | SCGB3A1/IRAK1   | 2 |
| GO:001990 translesion synthesis               | 41/18670  | 0.119885 | 0.417298 | 0.35997  | USP10/TRI1      | 2 |
| GO:003080 negative regulation of cell growth  | 41/18670  | 0.119885 | 0.417298 | 0.35997  | LMOD3/ALKBH5    | 2 |
| GO:003410 negative regulation of cell growth  | 41/18670  | 0.119885 | 0.417298 | 0.35997  | F2RL1/LY9       | 2 |

|                                        |           |          |          |          |            |    |
|----------------------------------------|-----------|----------|----------|----------|------------|----|
| GO:00353: fatty-acyl-CoA 2/272         | 41/18670  | 0.119885 | 0.417298 | 0.35997  | ACSL1/HSC  | 2  |
| GO:00434: skeletal muscle 2/272        | 41/18670  | 0.119885 | 0.417298 | 0.35997  | IFRD1/BIN  | 2  |
| GO:00507: activated T cell 2/272       | 41/18670  | 0.119885 | 0.417298 | 0.35997  | FADD/IL18  | 2  |
| GO:00508: brown fat cell 2/272         | 41/18670  | 0.119885 | 0.417298 | 0.35997  | PTGS2/RG   | 2  |
| GO:00703: negative regulation 2/272    | 41/18670  | 0.119885 | 0.417298 | 0.35997  | EPC1/CBX   | 2  |
| GO:00902: regulation of 2/272          | 41/18670  | 0.119885 | 0.417298 | 0.35997  | TACC3/RAI  | 2  |
| GO:00903: negative regulation 2/272    | 41/18670  | 0.119885 | 0.417298 | 0.35997  | TXN/LRRK   | 2  |
| GO:00989: vesicle-mediated 2/272       | 41/18670  | 0.119885 | 0.417298 | 0.35997  | AKTIP/LMT  | 2  |
| GO:19001: regulation of 2/272          | 41/18670  | 0.119885 | 0.417298 | 0.35997  | PAK2/RFFL  | 2  |
| GO:19028: regulation of 2/272          | 41/18670  | 0.119885 | 0.417298 | 0.35997  | HIF1A/HD   | 2  |
| GO:00093: response to 10/272           | 448/18670 | 0.120733 | 0.419418 | 0.3618   | TXN/RGR/I  | 10 |
| GO:19018: regulation of 3/272          | 83/18670  | 0.120849 | 0.419418 | 0.3618   | F2RL1/LM   | 3  |
| GO:20001: regulation of 3/272          | 83/18670  | 0.120849 | 0.419418 | 0.3618   | FADD/HIF1  | 3  |
| GO:00105: regulation of 5/272          | 180/18670 | 0.123343 | 0.427235 | 0.368542 | PTGS2/PSM  | 5  |
| GO:00713: cellular response 5/272      | 180/18670 | 0.123343 | 0.427235 | 0.368542 | IFNGR1/ST  | 5  |
| GO:00714: cellular response 8/272      | 339/18670 | 0.123578 | 0.427415 | 0.368698 | PTGS2/GAI  | 8  |
| GO:00002: spliceosomal 3/272           | 84/18670  | 0.124053 | 0.427415 | 0.368698 | SRPK2/PSII | 3  |
| GO:00027: regulation of 3/272          | 84/18670  | 0.124053 | 0.427415 | 0.368698 | F2RL1/B2M  | 3  |
| GO:00508: endocrine process 3/272      | 84/18670  | 0.124053 | 0.427415 | 0.368698 | NKX3-1/F2  | 3  |
| GO:00026: positive regulation 2/272    | 42/18670  | 0.124723 | 0.427415 | 0.368698 | IL4R/EXOS  | 2  |
| GO:00305: negative regulation 2/272    | 42/18670  | 0.124723 | 0.427415 | 0.368698 | IFRD1/CDK  | 2  |
| GO:00440: regulation of 2/272          | 42/18670  | 0.124723 | 0.427415 | 0.368698 | RAB3GAP1   | 2  |
| GO:00484: synaptic vesicle 2/272       | 42/18670  | 0.124723 | 0.427415 | 0.368698 | LRRK2/PIC  | 2  |
| GO:00511: negative regulation 2/272    | 42/18670  | 0.124723 | 0.427415 | 0.368698 | RGS2/HDA   | 2  |
| GO:19010: regulation of 2/272          | 42/18670  | 0.124723 | 0.427415 | 0.368698 | TXN/LRRK   | 2  |
| GO:19031: regulation of 2/272          | 42/18670  | 0.124723 | 0.427415 | 0.368698 | HK2/HIF1A  | 2  |
| GO:00024: production of 7/272          | 286/18670 | 0.125625 | 0.428832 | 0.36992  | F2RL1/IL4F | 7  |
| GO:00514: stress-activated 7/272       | 286/18670 | 0.125625 | 0.428832 | 0.36992  | GADD45G/   | 7  |
| GO:00313: negative regulation 4/272    | 132/18670 | 0.127223 | 0.428832 | 0.36992  | PFN2/TMS   | 4  |
| GO:20010: reactive nitrogen 3/272      | 85/18670  | 0.127288 | 0.428832 | 0.36992  | PTGS2/CLE  | 3  |
| GO:00019: negative regulation 2/272    | 43/18670  | 0.129608 | 0.428832 | 0.36992  | THBS1/MA   | 2  |
| GO:00030: skeletal muscle 2/272        | 43/18670  | 0.129608 | 0.428832 | 0.36992  | TNNI2/RCS  | 2  |
| GO:00328: regulation of 2/272          | 43/18670  | 0.129608 | 0.428832 | 0.36992  | IRS2/PPP1  | 2  |
| GO:00341: cellular response 2/272      | 43/18670  | 0.129608 | 0.428832 | 0.36992  | EIF2AK2/EI | 2  |
| GO:00420: T-helper 1 type 2/272        | 43/18670  | 0.129608 | 0.428832 | 0.36992  | IL4R/IL18  | 2  |
| GO:00454: positive regulation 2/272    | 43/18670  | 0.129608 | 0.428832 | 0.36992  | PTGS2/CLE  | 2  |
| GO:20010: regulation of 2/272          | 43/18670  | 0.129608 | 0.428832 | 0.36992  | TXN/LRRK   | 2  |
| GO:00434: regulation of 5/272          | 183/18670 | 0.129675 | 0.428832 | 0.36992  | PSMD12/E   | 5  |
| GO:00064: negative regulation 6/272    | 235/18670 | 0.129693 | 0.428832 | 0.36992  | PAK2/SH3I  | 6  |
| GO:00086: extrinsic apoptosis 3/272    | 86/18670  | 0.130552 | 0.428832 | 0.36992  | THBS1/RFF  | 3  |
| GO:00420: regulation of 3/272          | 86/18670  | 0.130552 | 0.428832 | 0.36992  | IFI6/PLAUF | 3  |
| GO:00424: hormone biosynthesis 3/272   | 86/18670  | 0.130552 | 0.428832 | 0.36992  | HSD17B11   | 3  |
| GO:00480: ephrin receptor 3/272        | 86/18670  | 0.130552 | 0.428832 | 0.36992  | CDK5R1/AI  | 3  |
| GO:00602: long-term synapse 3/272      | 86/18670  | 0.130552 | 0.428832 | 0.36992  | MME/EIF2   | 3  |
| GO:00705: response to fatty acid 3/272 | 86/18670  | 0.130552 | 0.428832 | 0.36992  | PTGS2/AC   | 3  |
| GO:00107: negative regulation 8/272    | 344/18670 | 0.1311   | 0.428832 | 0.36992  | KIAA0319/  | 8  |
| GO:00070: actin filament 9/272         | 400/18670 | 0.131616 | 0.428832 | 0.36992  | F2RL1/PFN  | 9  |
| GO:20000: regulation of 5/272          | 184/18670 | 0.131819 | 0.428832 | 0.36992  | ARID3A/G   | 5  |

|                             |       |           |          |          |                    |   |
|-----------------------------|-------|-----------|----------|----------|--------------------|---|
| GO:000265: positive regulat | 3/272 | 87/18670  | 0.133846 | 0.428832 | 0.36992 F2RL1/THE  | 3 |
| GO:000611: energy reserv    | 3/272 | 87/18670  | 0.133846 | 0.428832 | 0.36992 PYGL/IRS2, | 3 |
| GO:001063: regulation of    | 7/272 | 291/18670 | 0.133962 | 0.428832 | 0.36992 PTGS2/THI  | 7 |
| GO:000615: purine nucleo    | 2/272 | 44/18670  | 0.134536 | 0.428832 | 0.36992 PDE7A/NT   | 2 |
| GO:001046: mesenchymal      | 2/272 | 44/18670  | 0.134536 | 0.428832 | 0.36992 STAT1/IRS: | 2 |
| GO:001406: astrocyte dev    | 2/272 | 44/18670  | 0.134536 | 0.428832 | 0.36992 IFNGR1/S1  | 2 |
| GO:003585: epithelial cell  | 2/272 | 44/18670  | 0.134536 | 0.428832 | 0.36992 STAT1/MM   | 2 |
| GO:004295: amyloid precu    | 2/272 | 44/18670  | 0.134536 | 0.428832 | 0.36992 IFNGR1/PI  | 2 |
| GO:004406: regulation of    | 2/272 | 44/18670  | 0.134536 | 0.428832 | 0.36992 NKX3-1/F2  | 2 |
| GO:004405: membrane bic     | 2/272 | 44/18670  | 0.134536 | 0.428832 | 0.36992 PICALM/CI  | 2 |
| GO:006106: regulation of    | 2/272 | 44/18670  | 0.134536 | 0.428832 | 0.36992 CDK5R1/LF  | 2 |
| GO:009033: regulation of    | 2/272 | 44/18670  | 0.134536 | 0.428832 | 0.36992 JDP2/LRRK  | 2 |
| GO:190323: regulation of    | 2/272 | 44/18670  | 0.134536 | 0.428832 | 0.36992 UBE2D3/LI  | 2 |
| GO:190446: positive regul   | 2/272 | 44/18670  | 0.134536 | 0.428832 | 0.36992 PTGS2/CLE  | 2 |
| GO:000943: response to x    | 7/272 | 292/18670 | 0.135661 | 0.428832 | 0.36992 ACSL1/RGS  | 7 |
| GO:000166: fever generati   | 1/272 | 10/18670  | 0.13653  | 0.428832 | 0.36992 PTGS2      | 1 |
| GO:000175: natural killer c | 1/272 | 10/18670  | 0.13653  | 0.428832 | 0.36992 IL18       | 1 |
| GO:000654: histidine meta   | 1/272 | 10/18670  | 0.13653  | 0.428832 | 0.36992 HAL        | 1 |
| GO:001072: regulation of    | 1/272 | 10/18670  | 0.13653  | 0.428832 | 0.36992 THBS1      | 1 |
| GO:001404: regulation of    | 1/272 | 10/18670  | 0.13653  | 0.428832 | 0.36992 LRRK2      | 1 |
| GO:001404: positive regul   | 1/272 | 10/18670  | 0.13653  | 0.428832 | 0.36992 RAB3GAP1   | 1 |
| GO:001483: response to m    | 1/272 | 10/18670  | 0.13653  | 0.428832 | 0.36992 HDAC4      | 1 |
| GO:001483: response to d    | 1/272 | 10/18670  | 0.13653  | 0.428832 | 0.36992 HDAC4      | 1 |
| GO:001586: aromatic amir    | 1/272 | 10/18670  | 0.13653  | 0.428832 | 0.36992 SLC36A4    | 1 |
| GO:002154: pons developr    | 1/272 | 10/18670  | 0.13653  | 0.428832 | 0.36992 CDK5R1     | 1 |
| GO:003206: positive regul   | 1/272 | 10/18670  | 0.13653  | 0.428832 | 0.36992 IRS2       | 1 |
| GO:003233: alanine transp   | 1/272 | 10/18670  | 0.13653  | 0.428832 | 0.36992 SLC36A4    | 1 |
| GO:003262: interleukin-18   | 1/272 | 10/18670  | 0.13653  | 0.428832 | 0.36992 TLR2       | 1 |
| GO:003283: glomerular ba    | 1/272 | 10/18670  | 0.13653  | 0.428832 | 0.36992 SULF2      | 1 |
| GO:003313: regulation of    | 1/272 | 10/18670  | 0.13653  | 0.428832 | 0.36992 PFKFB2     | 1 |
| GO:003345: gas homeosta     | 1/272 | 10/18670  | 0.13653  | 0.428832 | 0.36992 HIF1A      | 1 |
| GO:003442: nuclear-transc   | 1/272 | 10/18670  | 0.13653  | 0.428832 | 0.36992 EXOSC3     | 1 |
| GO:003473: histone H4-K2    | 1/272 | 10/18670  | 0.13653  | 0.428832 | 0.36992 ARID4A     | 1 |
| GO:003555: monoubiquitin    | 1/272 | 10/18670  | 0.13653  | 0.428832 | 0.36992 USP15      | 1 |
| GO:004204: olfactory beh    | 1/272 | 10/18670  | 0.13653  | 0.428832 | 0.36992 CHD7       | 1 |
| GO:004275: long-chain fat   | 1/272 | 10/18670  | 0.13653  | 0.428832 | 0.36992 CYP4F3     | 1 |
| GO:004295: sequestering     | 1/272 | 10/18670  | 0.13653  | 0.428832 | 0.36992 TMSB4Y     | 1 |
| GO:004347: regulation of    | 1/272 | 10/18670  | 0.13653  | 0.428832 | 0.36992 PPP1R3D    | 1 |
| GO:004455: relaxation of    | 1/272 | 10/18670  | 0.13653  | 0.428832 | 0.36992 RGS2       | 1 |
| GO:004562: regulation of    | 1/272 | 10/18670  | 0.13653  | 0.428832 | 0.36992 IL4R       | 1 |
| GO:004594: positive regul   | 1/272 | 10/18670  | 0.13653  | 0.428832 | 0.36992 CHD8       | 1 |
| GO:004816: autophagic ce    | 1/272 | 10/18670  | 0.13653  | 0.428832 | 0.36992 EIF2AK4    | 1 |
| GO:004835: mesendoderr      | 1/272 | 10/18670  | 0.13653  | 0.428832 | 0.36992 EOMES      | 1 |
| GO:004875: branching mo     | 1/272 | 10/18670  | 0.13653  | 0.428832 | 0.36992 LRRK2      | 1 |
| GO:005103: actin filament   | 1/272 | 10/18670  | 0.13653  | 0.428832 | 0.36992 GMFG       | 1 |
| GO:005113: regulation of    | 1/272 | 10/18670  | 0.13653  | 0.428832 | 0.36992 IL18       | 1 |
| GO:005193: negative regul   | 1/272 | 10/18670  | 0.13653  | 0.428832 | 0.36992 THBS1      | 1 |
| GO:005264: alditol phosph   | 1/272 | 10/18670  | 0.13653  | 0.428832 | 0.36992 ACP6       | 1 |

|                                                  |           |          |          |          |                |   |
|--------------------------------------------------|-----------|----------|----------|----------|----------------|---|
| GO:006076: regulation of cation channel activity | 10/18670  | 0.13653  | 0.428832 | 0.36992  | NKX3-1         | 1 |
| GO:007005: regulation of cell cycle              | 10/18670  | 0.13653  | 0.428832 | 0.36992  | HIF1A          | 1 |
| GO:007035: response to lipopolysaccharide        | 10/18670  | 0.13653  | 0.428832 | 0.36992  | TLR2           | 1 |
| GO:007047: regulation of cell cycle              | 10/18670  | 0.13653  | 0.428832 | 0.36992  | ABAT           | 1 |
| GO:007094: neutrophil chemotaxis                 | 10/18670  | 0.13653  | 0.428832 | 0.36992  | F2RL1          | 1 |
| GO:007123: cellular response to hypoxia          | 10/18670  | 0.13653  | 0.428832 | 0.36992  | TLR2           | 1 |
| GO:007124: cellular response to hypoxia          | 10/18670  | 0.13653  | 0.428832 | 0.36992  | B2M            | 1 |
| GO:007223: cell proliferation                    | 10/18670  | 0.13653  | 0.428832 | 0.36992  | STAT1          | 1 |
| GO:009033: positive regulation of cell cycle     | 10/18670  | 0.13653  | 0.428832 | 0.36992  | PTGS2          | 1 |
| GO:010604: regulation of cell cycle              | 10/18670  | 0.13653  | 0.428832 | 0.36992  | PTGS2          | 1 |
| GO:190023: negative regulation of cell cycle     | 10/18670  | 0.13653  | 0.428832 | 0.36992  | IFNGR1         | 1 |
| GO:190043: positive regulation of cell cycle     | 10/18670  | 0.13653  | 0.428832 | 0.36992  | F2RL1          | 1 |
| GO:190173: regulation of cell cycle              | 10/18670  | 0.13653  | 0.428832 | 0.36992  | LRRK2          | 1 |
| GO:190203: regulation of cell cycle              | 10/18670  | 0.13653  | 0.428832 | 0.36992  | EIF2AK2        | 1 |
| GO:190468: negative regulation of cell cycle     | 10/18670  | 0.13653  | 0.428832 | 0.36992  | PICALM         | 1 |
| GO:199025: cellular response to hypoxia          | 10/18670  | 0.13653  | 0.428832 | 0.36992  | EIF2AK4        | 1 |
| GO:200003: regulation of cell cycle              | 10/18670  | 0.13653  | 0.428832 | 0.36992  | EVI2B          | 1 |
| GO:200048: negative regulation of cell cycle     | 10/18670  | 0.13653  | 0.428832 | 0.36992  | PRKAR2A        | 1 |
| GO:200064: regulation of cell cycle              | 10/18670  | 0.13653  | 0.428832 | 0.36992  | DTX3L          | 1 |
| GO:200066: regulation of cell cycle              | 10/18670  | 0.13653  | 0.428832 | 0.36992  | IL17RA         | 1 |
| GO:200083: positive regulation of cell cycle     | 10/18670  | 0.13653  | 0.428832 | 0.36992  | NKX3-1         | 1 |
| GO:200105: negative regulation of cell cycle     | 10/18670  | 0.13653  | 0.428832 | 0.36992  | HIF1A          | 1 |
| GO:200123: positive regulation of cell cycle     | 10/18670  | 0.13653  | 0.428832 | 0.36992  | RAP1A          | 1 |
| GO:000900: aerobic respiration                   | 88/18670  | 0.137169 | 0.428832 | 0.36992  | DLD/HIF1A      | 3 |
| GO:004214: retrograde transport                  | 88/18670  | 0.137169 | 0.428832 | 0.36992  | CLTCL1/STX11   | 3 |
| GO:006105: regulation of cell cycle              | 88/18670  | 0.137169 | 0.428832 | 0.36992  | PAK2/UNC5B     | 3 |
| GO:190046: regulation of cell cycle              | 88/18670  | 0.137169 | 0.428832 | 0.36992  | TXN/HIF1A      | 3 |
| GO:005146: neuron apoptosis                      | 239/18670 | 0.137245 | 0.428832 | 0.36992  | SRPK2/NQO1     | 6 |
| GO:007095: neuron death                          | 348/18670 | 0.137285 | 0.428832 | 0.36992  | SRPK2/NQO1     | 8 |
| GO:005114: striated muscle cell differentiation  | 293/18670 | 0.137372 | 0.428832 | 0.36992  | SCGB3A1/ILKAP  | 7 |
| GO:007200: renal system development              | 293/18670 | 0.137372 | 0.428832 | 0.36992  | NKX3-1/SLIT1   | 7 |
| GO:000725: female gamete development             | 136/18670 | 0.137508 | 0.428879 | 0.369961 | PTGS2/IL4I1    | 4 |
| GO:004816: regulation of cell cycle              | 187/18670 | 0.138344 | 0.431107 | 0.371882 | PTGS2/MMR1     | 5 |
| GO:004354: positive regulation of cell cycle     | 405/18670 | 0.138786 | 0.431497 | 0.372219 | F2RL1/RAF1     | 9 |
| GO:003245: endocytic recycling                   | 45/18670  | 0.139506 | 0.431497 | 0.372219 | LMTK2/RAV1     | 2 |
| GO:003257: response to proinflammatory stimulus  | 45/18670  | 0.139506 | 0.431497 | 0.372219 | THBS1/TLF1     | 2 |
| GO:003598: endodermal cell differentiation       | 45/18670  | 0.139506 | 0.431497 | 0.372219 | EOMES/MIR141   | 2 |
| GO:004427: cellular carbohydrate transport       | 45/18670  | 0.139506 | 0.431497 | 0.372219 | PYGL/PPP1R1B   | 2 |
| GO:007037: regulation of cell cycle              | 45/18670  | 0.139506 | 0.431497 | 0.372219 | EPC1/CBX3      | 2 |
| GO:190274: regulation of cell cycle              | 45/18670  | 0.139506 | 0.431497 | 0.372219 | BIN3/HDA1      | 2 |
| GO:001067: regulation of cell cycle              | 137/18670 | 0.14013  | 0.431497 | 0.372219 | PFKFB2/IRX1    | 4 |
| GO:009875: detoxification                        | 137/18670 | 0.14013  | 0.431497 | 0.372219 | TXN/PTGS2      | 4 |
| GO:000645: protein lipidation                    | 89/18670  | 0.140519 | 0.431497 | 0.372219 | PPM1B/RAV1     | 3 |
| GO:007124: cellular response to hypoxia          | 188/18670 | 0.14055  | 0.431497 | 0.372219 | PTGS2/B2M      | 5 |
| GO:005076: negative regulation of cell cycle     | 295/18670 | 0.140824 | 0.431497 | 0.372219 | KIAA0319/PTGS2 | 7 |
| GO:000187: negative regulation of cell cycle     | 296/18670 | 0.142566 | 0.431497 | 0.372219 | RPS6KA5/F2RL1  | 7 |
| GO:000930: amine metabolism                      | 138/18670 | 0.142773 | 0.431497 | 0.372219 | PSMD12/PKMT2   | 4 |
| GO:001066: epithelial cell differentiation       | 352/18670 | 0.143615 | 0.431497 | 0.372219 | PTGS2/THBS1    | 8 |



|                            |        |           |          |          |          |            |    |
|----------------------------|--------|-----------|----------|----------|----------|------------|----|
| GO:00310: positive regulat | 3/272  | 90/18670  | 0.143897 | 0.431497 | 0.372219 | RPS6KA5/J  | 3  |
| GO:00326: regulation of i  | 3/272  | 90/18670  | 0.143897 | 0.431497 | 0.372219 | MNDA/CLF   | 3  |
| GO:00024: inflammatory     | 2/272  | 46/18670  | 0.144515 | 0.431497 | 0.372219 | CYSLTR1/P  | 2  |
| GO:00059: glycogen biosy   | 2/272  | 46/18670  | 0.144515 | 0.431497 | 0.372219 | IRS2/PPP1  | 2  |
| GO:00092: glucan biosynt   | 2/272  | 46/18670  | 0.144515 | 0.431497 | 0.372219 | IRS2/PPP1  | 2  |
| GO:00108: regulation of l  | 2/272  | 46/18670  | 0.144515 | 0.431497 | 0.372219 | NFKBIA/O   | 2  |
| GO:00304: maturation of    | 2/272  | 46/18670  | 0.144515 | 0.431497 | 0.372219 | RPS28/RPS  | 2  |
| GO:00323: negative regul   | 2/272  | 46/18670  | 0.144515 | 0.431497 | 0.372219 | THBS1/IRS  | 2  |
| GO:00324: negative regul   | 2/272  | 46/18670  | 0.144515 | 0.431497 | 0.372219 | PPM1B/TR   | 2  |
| GO:00433: regulation of l  | 2/272  | 46/18670  | 0.144515 | 0.431497 | 0.372219 | F2RL1/IL4F | 2  |
| GO:00433: response to e    | 2/272  | 46/18670  | 0.144515 | 0.431497 | 0.372219 | IFIT1/NFKE | 2  |
| GO:00459: positive regul   | 2/272  | 46/18670  | 0.144515 | 0.431497 | 0.372219 | PFKFB2/HI  | 2  |
| GO:19000: regulation of c  | 2/272  | 46/18670  | 0.144515 | 0.431497 | 0.372219 | CLEC7A/IL  | 2  |
| GO:19005: positive regul   | 2/272  | 46/18670  | 0.144515 | 0.431497 | 0.372219 | PFKFB2/HI  | 2  |
| GO:19909: response to a    | 2/272  | 46/18670  | 0.144515 | 0.431497 | 0.372219 | EIF2AK2/EI | 2  |
| GO:00343: cell junction a  | 9/272  | 409/18670 | 0.144664 | 0.431497 | 0.372219 | NTNG2/RA   | 9  |
| GO:19029: regulation of s  | 8/272  | 353/18670 | 0.14522  | 0.431497 | 0.372219 | F2RL1/PFN  | 8  |
| GO:00900: positive regul   | 7/272  | 298/18670 | 0.146081 | 0.431497 | 0.372219 | ARID3A/G   | 7  |
| GO:00313: positive regul   | 6/272  | 244/18670 | 0.146969 | 0.431497 | 0.372219 | CLEC7A/PF  | 6  |
| GO:00518: regulation of f  | 6/272  | 244/18670 | 0.146969 | 0.431497 | 0.372219 | TXN/RAPG   | 6  |
| GO:00986: import into ce   | 5/272  | 191/18670 | 0.147261 | 0.431497 | 0.372219 | ACSL1/THE  | 5  |
| GO:00149: smooth muscl     | 3/272  | 91/18670  | 0.147302 | 0.431497 | 0.372219 | PLAU/HDA   | 3  |
| GO:00488: regulation of c  | 3/272  | 91/18670  | 0.147302 | 0.431497 | 0.372219 | CDK5R1/H   | 3  |
| GO:19040: negative regul   | 3/272  | 91/18670  | 0.147302 | 0.431497 | 0.372219 | RGS2/HEC   | 3  |
| GO:00074: axonogenesis     | 10/272 | 468/18670 | 0.147329 | 0.431497 | 0.372219 | RPS6KA5/I  | 10 |
| GO:00463: positive regul   | 4/272  | 140/18670 | 0.148117 | 0.431497 | 0.372219 | GADD45G/   | 4  |
| GO:00901: epithelium mi    | 8/272  | 355/18670 | 0.148456 | 0.431497 | 0.372219 | PTGS2/THI  | 8  |
| GO:00083: RNA splicing     | 10/272 | 469/18670 | 0.148733 | 0.431497 | 0.372219 | POLR2J/US  | 10 |
| GO:00026: regulation of c  | 1/272  | 11/18670  | 0.149116 | 0.431497 | 0.372219 | THBS1      | 1  |
| GO:00030: regulation of ξ  | 1/272  | 11/18670  | 0.149116 | 0.431497 | 0.372219 | F2RL1      | 1  |
| GO:00068: carnitine shut   | 1/272  | 11/18670  | 0.149116 | 0.431497 | 0.372219 | SLC25A20   | 1  |
| GO:00101: embryonic bo     | 1/272  | 11/18670  | 0.149116 | 0.431497 | 0.372219 | ZNF281     | 1  |
| GO:00148: response to m    | 1/272  | 11/18670  | 0.149116 | 0.431497 | 0.372219 | HDAC4      | 1  |
| GO:00190: viral latency    | 1/272  | 11/18670  | 0.149116 | 0.431497 | 0.372219 | PSIP1      | 1  |
| GO:00193: cyclooxygenas    | 1/272  | 11/18670  | 0.149116 | 0.431497 | 0.372219 | PTGS2      | 1  |
| GO:00195: oxalate transp   | 1/272  | 11/18670  | 0.149116 | 0.431497 | 0.372219 | SLC26A8    | 1  |
| GO:00319: positive regul   | 1/272  | 11/18670  | 0.149116 | 0.431497 | 0.372219 | PTGS2      | 1  |
| GO:00329: regulation of t  | 1/272  | 11/18670  | 0.149116 | 0.431497 | 0.372219 | THBS1      | 1  |
| GO:00332: positive regul   | 1/272  | 11/18670  | 0.149116 | 0.431497 | 0.372219 | HDAC4      | 1  |
| GO:00354: histone-serine   | 1/272  | 11/18670  | 0.149116 | 0.431497 | 0.372219 | RPS6KA5    | 1  |
| GO:00364: TRAIL-activate   | 1/272  | 11/18670  | 0.149116 | 0.431497 | 0.372219 | FADD       | 1  |
| GO:00436: regulation of t  | 1/272  | 11/18670  | 0.149116 | 0.431497 | 0.372219 | HIF1A      | 1  |
| GO:00465: sphingosine bi   | 1/272  | 11/18670  | 0.149116 | 0.431497 | 0.372219 | ASAH1      | 1  |
| GO:00468: positive regul   | 1/272  | 11/18670  | 0.149116 | 0.431497 | 0.372219 | HIF1A      | 1  |
| GO:00601: regulation of c  | 1/272  | 11/18670  | 0.149116 | 0.431497 | 0.372219 | LRRK2      | 1  |
| GO:00607: epithelial cell  | 1/272  | 11/18670  | 0.149116 | 0.431497 | 0.372219 | NKX3-1     | 1  |
| GO:00701: interleukin-27   | 1/272  | 11/18670  | 0.149116 | 0.431497 | 0.372219 | STAT1      | 1  |
| GO:00704: uterine smoot    | 1/272  | 11/18670  | 0.149116 | 0.431497 | 0.372219 | ABAT       | 1  |

|                                   |           |          |          |          |            |    |
|-----------------------------------|-----------|----------|----------|----------|------------|----|
| GO:007067: response to in 1/272   | 11/18670  | 0.149116 | 0.431497 | 0.372219 | IL18       | 1  |
| GO:007075: interleukin-35 1/272   | 11/18670  | 0.149116 | 0.431497 | 0.372219 | STAT1      | 1  |
| GO:007093: histone H4 de 1/272    | 11/18670  | 0.149116 | 0.431497 | 0.372219 | HDAC4      | 1  |
| GO:007253: fibroblast acti 1/272  | 11/18670  | 0.149116 | 0.431497 | 0.372219 | IL17RA     | 1  |
| GO:007258: caveolin-medi 1/272    | 11/18670  | 0.149116 | 0.431497 | 0.372219 | UNC119     | 1  |
| GO:007263: interleukin-10 1/272   | 11/18670  | 0.149116 | 0.431497 | 0.372219 | F2RL1      | 1  |
| GO:007265: interleukin-13 1/272   | 11/18670  | 0.149116 | 0.431497 | 0.372219 | IL17RA     | 1  |
| GO:007268: T cell extravas 1/272  | 11/18670  | 0.149116 | 0.431497 | 0.372219 | FADD       | 1  |
| GO:009035: negative regul 1/272   | 11/18670  | 0.149116 | 0.431497 | 0.372219 | LRRK2      | 1  |
| GO:190153: fatty acid deri 1/272  | 11/18670  | 0.149116 | 0.431497 | 0.372219 | CYP4F3     | 1  |
| GO:190293: protein localiz 1/272  | 11/18670  | 0.149116 | 0.431497 | 0.372219 | DTX3L      | 1  |
| GO:190325: regulation of f 1/272  | 11/18670  | 0.149116 | 0.431497 | 0.372219 | PFKFB2     | 1  |
| GO:190398: positive regul 1/272   | 11/18670  | 0.149116 | 0.431497 | 0.372219 | LRRK2      | 1  |
| GO:190433: response to fc 1/272   | 11/18670  | 0.149116 | 0.431497 | 0.372219 | AHR        | 1  |
| GO:190435: cellular respor 1/272  | 11/18670  | 0.149116 | 0.431497 | 0.372219 | AHR        | 1  |
| GO:190523: regulation of e 1/272  | 11/18670  | 0.149116 | 0.431497 | 0.372219 | PICALM     | 1  |
| GO:190563: positive regul 1/272   | 11/18670  | 0.149116 | 0.431497 | 0.372219 | DTX3L      | 1  |
| GO:200078: positive regul 1/272   | 11/18670  | 0.149116 | 0.431497 | 0.372219 | RAB3GAP1   | 1  |
| GO:000753: female pregn 5/272     | 192/18670 | 0.149528 | 0.431497 | 0.372219 | PTGS2/PSC  | 5  |
| GO:000693: acute-phase r 2/272    | 47/18670  | 0.149561 | 0.431497 | 0.372219 | PTGS2/ORI  | 2  |
| GO:001815: peptidyl-cyste 2/272   | 47/18670  | 0.149561 | 0.431497 | 0.372219 | S100A9/S1  | 2  |
| GO:003573: interleukin-12 2/272   | 47/18670  | 0.149561 | 0.431497 | 0.372219 | PAK2/LMN   | 2  |
| GO:004333: regulation of ( 2/272  | 47/18670  | 0.149561 | 0.431497 | 0.372219 | IL4R/IL18  | 2  |
| GO:004663: positive regul 2/272   | 47/18670  | 0.149561 | 0.431497 | 0.372219 | IL4R/IL18  | 2  |
| GO:006163: pri-miRNA tra 2/272    | 47/18670  | 0.149561 | 0.431497 | 0.372219 | HIF1A/HD   | 2  |
| GO:007023: T cell apoptoti 2/272  | 47/18670  | 0.149561 | 0.431497 | 0.372219 | FADD/HIF1  | 2  |
| GO:190073: regulation of r 2/272  | 47/18670  | 0.149561 | 0.431497 | 0.372219 | GADD45G/   | 2  |
| GO:190358: positive regul 2/272   | 47/18670  | 0.149561 | 0.431497 | 0.372219 | PFKFB2/HI  | 2  |
| GO:000683: amino acid tra 4/272   | 141/18670 | 0.150817 | 0.43406  | 0.37443  | RGS2/RAB   | 4  |
| GO:000943: response to U 4/272    | 141/18670 | 0.150817 | 0.43406  | 0.37443  | PTGS2/MM   | 4  |
| GO:006203: positive regul 4/272   | 141/18670 | 0.150817 | 0.43406  | 0.37443  | PTGS2/PFK  | 4  |
| GO:005123: negative regul 5/272   | 193/18670 | 0.15181  | 0.434153 | 0.37451  | TXN/F2RL1  | 5  |
| GO:190165: response to k 5/272    | 193/18670 | 0.15181  | 0.434153 | 0.37451  | NKX3-1/TF  | 5  |
| GO:009723: cellular respor 6/272  | 247/18670 | 0.15295  | 0.434153 | 0.37451  | TXN/PTGS   | 6  |
| GO:003813: ERBB signaling 4/272   | 142/18670 | 0.153537 | 0.434153 | 0.37451  | RPS6KA5/I  | 4  |
| GO:001083: lipid localizati 9/272 | 415/18670 | 0.153716 | 0.434153 | 0.37451  | NKX3-1/AC  | 9  |
| GO:001093: negative regul 3/272   | 93/18670  | 0.154189 | 0.434153 | 0.37451  | PSMD12/P   | 3  |
| GO:003643: cell death in r 3/272  | 93/18670  | 0.154189 | 0.434153 | 0.37451  | TXN/HIF1A  | 3  |
| GO:005193: regulation of e 3/272  | 93/18670  | 0.154189 | 0.434153 | 0.37451  | RGS2/RAB   | 3  |
| GO:190118: regulation of f 3/272  | 93/18670  | 0.154189 | 0.434153 | 0.37451  | IFI6/PLAUF | 3  |
| GO:000753: lactation 2/272        | 48/18670  | 0.154643 | 0.434153 | 0.37451  | HK2/HIF1A  | 2  |
| GO:000803: neuron recogn 2/272    | 48/18670  | 0.154643 | 0.434153 | 0.37451  | CDK5R1/N   | 2  |
| GO:000853: visual learning 2/272  | 48/18670  | 0.154643 | 0.434153 | 0.37451  | HIF1A/NPT  | 2  |
| GO:003263: regulation of i 2/272  | 48/18670  | 0.154643 | 0.434153 | 0.37451  | PPM1B/TL   | 2  |
| GO:004583: negative regul 2/272   | 48/18670  | 0.154643 | 0.434153 | 0.37451  | UNC119/P   | 2  |
| GO:006103: positive regul 2/272   | 48/18670  | 0.154643 | 0.434153 | 0.37451  | TOB1/TNR   | 2  |
| GO:009013: regulation of r 2/272  | 48/18670  | 0.154643 | 0.434153 | 0.37451  | PLAUR/MM   | 2  |
| GO:005073: positive regul 10/272  | 474/18670 | 0.155854 | 0.434153 | 0.37451  | MME/RAP    | 10 |

|                                                 |        |           |          |          |         |           |    |
|-------------------------------------------------|--------|-----------|----------|----------|---------|-----------|----|
| GO:000660: protein import                       | 4/272  | 143/18670 | 0.156275 | 0.434153 | 0.37451 | PTGS2/RPL | 4  |
| GO:004434: cellular response                    | 4/272  | 143/18670 | 0.156275 | 0.434153 | 0.37451 | POLR2J/SU | 4  |
| GO:010610: cold-induced transcription           | 4/272  | 143/18670 | 0.156275 | 0.434153 | 0.37451 | GADD45G/  | 4  |
| GO:012016: regulation of cell cycle             | 4/272  | 143/18670 | 0.156275 | 0.434153 | 0.37451 | GADD45G/  | 4  |
| GO:004603: ATP metabolic process                | 7/272  | 304/18670 | 0.15687  | 0.434153 | 0.37451 | DLD/PFKFE | 7  |
| GO:004215: lipoprotein biosynthesis             | 3/272  | 94/18670  | 0.157671 | 0.434153 | 0.37451 | PPM1B/RA  | 3  |
| GO:004562: positive regulation of cell cycle    | 3/272  | 94/18670  | 0.157671 | 0.434153 | 0.37451 | PPP2R3C/I | 3  |
| GO:005128: protein homeostasis                  | 3/272  | 94/18670  | 0.157671 | 0.434153 | 0.37451 | UPB1/B2M  | 3  |
| GO:009013: tissue migration                     | 8/272  | 361/18670 | 0.158374 | 0.434153 | 0.37451 | PTGS2/THI | 8  |
| GO:000268: regulation of cell cycle             | 5/272  | 196/18670 | 0.158742 | 0.434153 | 0.37451 | F2RL1/THE | 5  |
| GO:000197: T cell mediated immunity             | 2/272  | 49/18670  | 0.159757 | 0.434153 | 0.37451 | B2M/FADD  | 2  |
| GO:000253: cytokine production                  | 2/272  | 49/18670  | 0.159757 | 0.434153 | 0.37451 | CLEC7A/IL | 2  |
| GO:000304: regulation of cell cycle             | 2/272  | 49/18670  | 0.159757 | 0.434153 | 0.37451 | F2RL1/MM  | 2  |
| GO:003085: negative regulation of cell cycle    | 2/272  | 49/18670  | 0.159757 | 0.434153 | 0.37451 | STAT1/MM  | 2  |
| GO:003426: negative regulation of cell cycle    | 2/272  | 49/18670  | 0.159757 | 0.434153 | 0.37451 | PTPRN2/LF | 2  |
| GO:003505: response to nitrogen                 | 2/272  | 49/18670  | 0.159757 | 0.434153 | 0.37451 | B2M/ABA1  | 2  |
| GO:007134: cellular response                    | 2/272  | 49/18670  | 0.159757 | 0.434153 | 0.37451 | PAK2/LMN  | 2  |
| GO:190470: positive regulation of cell cycle    | 2/272  | 49/18670  | 0.159757 | 0.434153 | 0.37451 | NQO2/MM   | 2  |
| GO:001049: proteasomal proteolysis              | 10/272 | 477/18670 | 0.160207 | 0.434153 | 0.37451 | UBE2D3/P  | 10 |
| GO:190495: negative regulation of cell cycle    | 5/272  | 197/18670 | 0.161081 | 0.434153 | 0.37451 | TXN/F2RL1 | 5  |
| GO:004210: positive regulation of cell cycle    | 3/272  | 95/18670  | 0.161176 | 0.434153 | 0.37451 | TNFSF13B/ | 3  |
| GO:009773: ciliary basal body                   | 3/272  | 95/18670  | 0.161176 | 0.434153 | 0.37451 | CEP152/TU | 3  |
| GO:000200: regulation of cell cycle             | 1/272  | 12/18670  | 0.16152  | 0.434153 | 0.37451 | MME       | 1  |
| GO:000200: angiotensin mediated signaling       | 1/272  | 12/18670  | 0.16152  | 0.434153 | 0.37451 | MME       | 1  |
| GO:000246: dendritic cell maturation            | 1/272  | 12/18670  | 0.16152  | 0.434153 | 0.37451 | THBS1     | 1  |
| GO:000286: negative regulation of cell cycle    | 1/272  | 12/18670  | 0.16152  | 0.434153 | 0.37451 | PSMA1     | 1  |
| GO:000290: negative regulation of cell cycle    | 1/272  | 12/18670  | 0.16152  | 0.434153 | 0.37451 | IRS2      | 1  |
| GO:000333: mesenchymal cell maturation          | 1/272  | 12/18670  | 0.16152  | 0.434153 | 0.37451 | STAT1     | 1  |
| GO:000652: arginine catabolism                  | 1/272  | 12/18670  | 0.16152  | 0.434153 | 0.37451 | PADI4     | 1  |
| GO:000655: lysine catabolism                    | 1/272  | 12/18670  | 0.16152  | 0.434153 | 0.37451 | DLD       | 1  |
| GO:000666: glycerol ether biosynthesis          | 1/272  | 12/18670  | 0.16152  | 0.434153 | 0.37451 | TXN       | 1  |
| GO:001088: regulation of cell cycle             | 1/272  | 12/18670  | 0.16152  | 0.434153 | 0.37451 | OSBPL8    | 1  |
| GO:001483: gastro-intestinal motility           | 1/272  | 12/18670  | 0.16152  | 0.434153 | 0.37451 | SULF2     | 1  |
| GO:001569: quaternary ammonium ion transport    | 1/272  | 12/18670  | 0.16152  | 0.434153 | 0.37451 | SLC25A20  | 1  |
| GO:001583: glycine transport                    | 1/272  | 12/18670  | 0.16152  | 0.434153 | 0.37451 | RGS2      | 1  |
| GO:001618: synaptic vesicle maturation          | 1/272  | 12/18670  | 0.16152  | 0.434153 | 0.37451 | PICALM    | 1  |
| GO:002183: layer formation                      | 1/272  | 12/18670  | 0.16152  | 0.434153 | 0.37451 | CDK5R1    | 1  |
| GO:003113: snoRNA 3'-end processing             | 1/272  | 12/18670  | 0.16152  | 0.434153 | 0.37451 | EXOSC3    | 1  |
| GO:003135: regulation of cell cycle             | 1/272  | 12/18670  | 0.16152  | 0.434153 | 0.37451 | PTGS2     | 1  |
| GO:003225: secretory granule maturation         | 1/272  | 12/18670  | 0.16152  | 0.434153 | 0.37451 | KIF1B     | 1  |
| GO:003290: transforming growth factor signaling | 1/272  | 12/18670  | 0.16152  | 0.434153 | 0.37451 | THBS1     | 1  |
| GO:003352: histone H2B ubiquitination           | 1/272  | 12/18670  | 0.16152  | 0.434153 | 0.37451 | DTX3L     | 1  |
| GO:003509: sperm chromatin condensation         | 1/272  | 12/18670  | 0.16152  | 0.434153 | 0.37451 | SRPK1     | 1  |
| GO:003575: regulation of cell cycle             | 1/272  | 12/18670  | 0.16152  | 0.434153 | 0.37451 | LRRK2     | 1  |
| GO:003600: response to mechanical force         | 1/272  | 12/18670  | 0.16152  | 0.434153 | 0.37451 | TLR2      | 1  |
| GO:003600: cellular response                    | 1/272  | 12/18670  | 0.16152  | 0.434153 | 0.37451 | TLR2      | 1  |
| GO:003800: opioid receptor signaling            | 1/272  | 12/18670  | 0.16152  | 0.434153 | 0.37451 | OGFRL1    | 1  |
| GO:004543: positive regulation of cell cycle    | 1/272  | 12/18670  | 0.16152  | 0.434153 | 0.37451 | CLEC7A    | 1  |

|                             |        |           |          |          |          |           |    |
|-----------------------------|--------|-----------|----------|----------|----------|-----------|----|
| GO:00455: positive regul    | 1/272  | 12/18670  | 0.16152  | 0.434153 | 0.37451  | PPP2R3C   | 1  |
| GO:00465: sphingoid bios    | 1/272  | 12/18670  | 0.16152  | 0.434153 | 0.37451  | ASAH1     | 1  |
| GO:00469: negative regul    | 1/272  | 12/18670  | 0.16152  | 0.434153 | 0.37451  | RAP1A     | 1  |
| GO:00510: regulation of t   | 1/272  | 12/18670  | 0.16152  | 0.434153 | 0.37451  | IFIT1     | 1  |
| GO:00511: NK T cell activ   | 1/272  | 12/18670  | 0.16152  | 0.434153 | 0.37451  | IL18      | 1  |
| GO:00528: imidazole-con     | 1/272  | 12/18670  | 0.16152  | 0.434153 | 0.37451  | HAL       | 1  |
| GO:00600: radial glial cell | 1/272  | 12/18670  | 0.16152  | 0.434153 | 0.37451  | CDH2      | 1  |
| GO:00603: negative regul    | 1/272  | 12/18670  | 0.16152  | 0.434153 | 0.37451  | PBLD      | 1  |
| GO:00604: branching inv     | 1/272  | 12/18670  | 0.16152  | 0.434153 | 0.37451  | NKX3-1    | 1  |
| GO:00702: regulation of t   | 1/272  | 12/18670  | 0.16152  | 0.434153 | 0.37451  | HIF1A     | 1  |
| GO:00704: thrombin-acti     | 1/272  | 12/18670  | 0.16152  | 0.434153 | 0.37451  | F2RL1     | 1  |
| GO:00711: response to p     | 1/272  | 12/18670  | 0.16152  | 0.434153 | 0.37451  | HDAC4     | 1  |
| GO:00716: positive regul    | 1/272  | 12/18670  | 0.16152  | 0.434153 | 0.37451  | CLEC7A    | 1  |
| GO:00903: negative regul    | 1/272  | 12/18670  | 0.16152  | 0.434153 | 0.37451  | ABAT      | 1  |
| GO:00971: postsynaptic r    | 1/272  | 12/18670  | 0.16152  | 0.434153 | 0.37451  | CDH2      | 1  |
| GO:00988: modification c    | 1/272  | 12/18670  | 0.16152  | 0.434153 | 0.37451  | PFN2      | 1  |
| GO:00995: trans-synaptic    | 1/272  | 12/18670  | 0.16152  | 0.434153 | 0.37451  | NPTN      | 1  |
| GO:01500: regulation of c   | 1/272  | 12/18670  | 0.16152  | 0.434153 | 0.37451  | LRRK2     | 1  |
| GO:19046: positive regul    | 1/272  | 12/18670  | 0.16152  | 0.434153 | 0.37451  | GOLGA2    | 1  |
| GO:19056: regulation of f   | 1/272  | 12/18670  | 0.16152  | 0.434153 | 0.37451  | DTX3L     | 1  |
| GO:20006: negative regul    | 1/272  | 12/18670  | 0.16152  | 0.434153 | 0.37451  | HECW2     | 1  |
| GO:20010: regulation of r   | 1/272  | 12/18670  | 0.16152  | 0.434153 | 0.37451  | HIF1A     | 1  |
| GO:00430: regulation of c   | 10/272 | 479/18670 | 0.163143 | 0.437759 | 0.377621 | F2RL1/RAF | 10 |
| GO:00305: regulation of e   | 3/272  | 96/18670  | 0.164705 | 0.437759 | 0.377621 | IFRD1/TNF | 3  |
| GO:00480: vascular endo     | 3/272  | 96/18670  | 0.164705 | 0.437759 | 0.377621 | PAK2/HIF1 | 3  |
| GO:19908: response to le    | 3/272  | 96/18670  | 0.164705 | 0.437759 | 0.377621 | TLE4/HK2/ | 3  |
| GO:19908: cellular respor   | 3/272  | 96/18670  | 0.164705 | 0.437759 | 0.377621 | TLE4/HK2/ | 3  |
| GO:00017: endoderm for      | 2/272  | 50/18670  | 0.164902 | 0.437759 | 0.377621 | EOMES/MI  | 2  |
| GO:00019: positive regul    | 2/272  | 50/18670  | 0.164902 | 0.437759 | 0.377621 | FADD/HIF1 | 2  |
| GO:00706: response to in    | 2/272  | 50/18670  | 0.164902 | 0.437759 | 0.377621 | PAK2/LMN  | 2  |
| GO:19037: positive regul    | 2/272  | 50/18670  | 0.164902 | 0.437759 | 0.377621 | RAB3GAP1  | 2  |
| GO:00343: response to in    | 5/272  | 199/18670 | 0.165802 | 0.437759 | 0.377621 | IFNGR1/ST | 5  |
| GO:00022: myeloid cell h    | 4/272  | 147/18670 | 0.167406 | 0.437759 | 0.377621 | STAT1/B2M | 4  |
| GO:00712: cellular respor   | 4/272  | 147/18670 | 0.167406 | 0.437759 | 0.377621 | TXN/RPL2E | 4  |
| GO:00609: dendritic spin    | 3/272  | 97/18670  | 0.168257 | 0.437759 | 0.377621 | PAK2/CDK1 | 3  |
| GO:19028: regulation of r   | 3/272  | 97/18670  | 0.168257 | 0.437759 | 0.377621 | TXN/HIF1A | 3  |
| GO:20010: positive regul    | 3/272  | 97/18670  | 0.168257 | 0.437759 | 0.377621 | NKX3-1/RF | 3  |
| GO:00067: coenzyme me       | 6/272  | 255/18670 | 0.169416 | 0.437759 | 0.377621 | DLD/PTGS2 | 6  |
| GO:00224: positive regul    | 6/272  | 255/18670 | 0.169416 | 0.437759 | 0.377621 | PAK2/SIRP | 6  |
| GO:00007: DNA synthesis     | 2/272  | 51/18670  | 0.170075 | 0.437759 | 0.377621 | USP10/TRI | 2  |
| GO:00067: oxidoreductio     | 2/272  | 51/18670  | 0.170075 | 0.437759 | 0.377621 | PTGS2/SLC | 2  |
| GO:00075: embryo impla      | 2/272  | 51/18670  | 0.170075 | 0.437759 | 0.377621 | PTGS2/MM  | 2  |
| GO:00196: NAD metaboli      | 2/272  | 51/18670  | 0.170075 | 0.437759 | 0.377621 | HK2/BST1  | 2  |
| GO:00456: negative regul    | 2/272  | 51/18670  | 0.170075 | 0.437759 | 0.377621 | TOB1/HDA  | 2  |
| GO:00486: regulation of s   | 2/272  | 51/18670  | 0.170075 | 0.437759 | 0.377621 | HDAC4/LM  | 2  |
| GO:00725: purine-contair    | 2/272  | 51/18670  | 0.170075 | 0.437759 | 0.377621 | PDE7A/NT  | 2  |
| GO:00140: phosphatidyli     | 4/272  | 148/18670 | 0.170232 | 0.437759 | 0.377621 | NKX3-1/F2 | 4  |
| GO:00160: cell growth       | 10/272 | 484/18670 | 0.170596 | 0.437759 | 0.377621 | RPS6KA3/I | 10 |

|                                                   |           |          |          |          |               |   |
|---------------------------------------------------|-----------|----------|----------|----------|---------------|---|
| GO:004580: positive regulation of cell cycle      | 98/18670  | 0.171831 | 0.437759 | 0.377621 | F2RL1/B2M     | 3 |
| GO:005082: regulation of cell cycle               | 98/18670  | 0.171831 | 0.437759 | 0.377621 | TMBIM4/EBP1   | 3 |
| GO:009917: regulation of cell cycle               | 98/18670  | 0.171831 | 0.437759 | 0.377621 | CDK5R1/LFNB1  | 3 |
| GO:005085: T cell receptor signaling pathway      | 202/18670 | 0.172984 | 0.437759 | 0.377621 | PAK2/PSM1     | 5 |
| GO:005168: vesicle localization                   | 202/18670 | 0.172984 | 0.437759 | 0.377621 | GOLGA2/KOIL1  | 5 |
| GO:005175: interaction with cell cycle            | 202/18670 | 0.172984 | 0.437759 | 0.377621 | IFIT1/EIF2AK1 | 5 |
| GO:190280: regulation of cell cycle               | 202/18670 | 0.172984 | 0.437759 | 0.377621 | ARID3A/GATA1  | 5 |
| GO:000271: regulation of cell cycle               | 149/18670 | 0.173075 | 0.437759 | 0.377621 | EXOSC3/B2M    | 4 |
| GO:190121: regulation of cell cycle               | 313/18670 | 0.173714 | 0.437759 | 0.377621 | SRPK2/NQO1    | 7 |
| GO:000021: meiotic spindle organization           | 13/18670  | 0.173743 | 0.437759 | 0.377621 | GOLGA2        | 1 |
| GO:000655: lysine metabolism                      | 13/18670  | 0.173743 | 0.437759 | 0.377621 | DLD           | 1 |
| GO:000666: sphingosine metabolism                 | 13/18670  | 0.173743 | 0.437759 | 0.377621 | ASAH1         | 1 |
| GO:000825: intracellular protein transport        | 13/18670  | 0.173743 | 0.437759 | 0.377621 | EXOSC3        | 1 |
| GO:001074: negative regulation of cell cycle      | 13/18670  | 0.173743 | 0.437759 | 0.377621 | NFKBIA        | 1 |
| GO:001076: positive regulation of cell cycle      | 13/18670  | 0.173743 | 0.437759 | 0.377621 | THBS1         | 1 |
| GO:001083: positive regulation of cell cycle      | 13/18670  | 0.173743 | 0.437759 | 0.377621 | HIF1A         | 1 |
| GO:001094: positive regulation of cell cycle      | 13/18670  | 0.173743 | 0.437759 | 0.377621 | HEBP2         | 1 |
| GO:001583: gamma-aminobutyrate metabolism         | 13/18670  | 0.173743 | 0.437759 | 0.377621 | ABAT          | 1 |
| GO:001985: axonal transport                       | 13/18670  | 0.173743 | 0.437759 | 0.377621 | HIF1A         | 1 |
| GO:002197: telencephalon development              | 13/18670  | 0.173743 | 0.437759 | 0.377621 | EOMES         | 1 |
| GO:003127: positive regulation of cell cycle      | 13/18670  | 0.173743 | 0.437759 | 0.377621 | F2RL1         | 1 |
| GO:003277: positive regulation of cell cycle      | 13/18670  | 0.173743 | 0.437759 | 0.377621 | IL18          | 1 |
| GO:003278: positive regulation of cell cycle      | 13/18670  | 0.173743 | 0.437759 | 0.377621 | IL17RA        | 1 |
| GO:003317: regulation of cell cycle               | 13/18670  | 0.173743 | 0.437759 | 0.377621 | RPS6KA5       | 1 |
| GO:003498: mitochondrial transport                | 13/18670  | 0.173743 | 0.437759 | 0.377621 | LRRK2         | 1 |
| GO:003556: positive regulation of cell cycle      | 13/18670  | 0.173743 | 0.437759 | 0.377621 | DTX3L         | 1 |
| GO:003564: locomotory behavior                    | 13/18670  | 0.173743 | 0.437759 | 0.377621 | LRRK2         | 1 |
| GO:003616: alpha-linolenic acid metabolism        | 13/18670  | 0.173743 | 0.437759 | 0.377621 | ACSL1         | 1 |
| GO:003806: collagen activation                    | 13/18670  | 0.173743 | 0.437759 | 0.377621 | OSCAR         | 1 |
| GO:004217: xenobiotic catabolism                  | 13/18670  | 0.173743 | 0.437759 | 0.377621 | ACSL1         | 1 |
| GO:004479: negative regulation of cell cycle      | 13/18670  | 0.173743 | 0.437759 | 0.377621 | EIF2AK4       | 1 |
| GO:004500: DNA deamination                        | 13/18670  | 0.173743 | 0.437759 | 0.377621 | EXOSC3        | 1 |
| GO:004507: positive regulation of cell cycle      | 13/18670  | 0.173743 | 0.437759 | 0.377621 | CLEC7A        | 1 |
| GO:004508: positive regulation of cell cycle      | 13/18670  | 0.173743 | 0.437759 | 0.377621 | CLEC7A        | 1 |
| GO:004582: negative regulation of cell cycle      | 13/18670  | 0.173743 | 0.437759 | 0.377621 | HDAC4         | 1 |
| GO:004604: IMP metabolic process                  | 13/18670  | 0.173743 | 0.437759 | 0.377621 | NT5C2         | 1 |
| GO:004748: regulation of cell cycle               | 13/18670  | 0.173743 | 0.437759 | 0.377621 | PTGS2         | 1 |
| GO:005074: regulation of cell cycle               | 13/18670  | 0.173743 | 0.437759 | 0.377621 | RAB3GAP1      | 1 |
| GO:005149: myoblast migration                     | 13/18670  | 0.173743 | 0.437759 | 0.377621 | BIN3          | 1 |
| GO:006016: positive regulation of cell cycle      | 13/18670  | 0.173743 | 0.437759 | 0.377621 | F2RL1         | 1 |
| GO:006017: regulation of cell cycle               | 13/18670  | 0.173743 | 0.437759 | 0.377621 | CHD7          | 1 |
| GO:006034: positive regulation of cell cycle      | 13/18670  | 0.173743 | 0.437759 | 0.377621 | FADD          | 1 |
| GO:006057: intestinal epithelial cell development | 13/18670  | 0.173743 | 0.437759 | 0.377621 | HIF1A         | 1 |
| GO:006109: negative regulation of cell cycle      | 13/18670  | 0.173743 | 0.437759 | 0.377621 | RGS2          | 1 |
| GO:006147: response to plant hormone              | 13/18670  | 0.173743 | 0.437759 | 0.377621 | AHR           | 1 |
| GO:007043: nucleotide biosynthesis                | 13/18670  | 0.173743 | 0.437759 | 0.377621 | NFKBIA        | 1 |
| GO:007102: nuclear RNA synthesis                  | 13/18670  | 0.173743 | 0.437759 | 0.377621 | EXOSC3        | 1 |
| GO:007103: nuclear mRNA processing                | 13/18670  | 0.173743 | 0.437759 | 0.377621 | EXOSC3        | 1 |

|                                               |       |           |          |          |          |            |   |
|-----------------------------------------------|-------|-----------|----------|----------|----------|------------|---|
| GO:00712 cellular response                    | 1/272 | 13/18670  | 0.173743 | 0.437759 | 0.377621 | LRRK2      | 1 |
| GO:00721 regulation of response               | 1/272 | 13/18670  | 0.173743 | 0.437759 | 0.377621 | STAT1      | 1 |
| GO:00903 replicative stress                   | 1/272 | 13/18670  | 0.173743 | 0.437759 | 0.377621 | MME        | 1 |
| GO:00905 inflammatory response                | 1/272 | 13/18670  | 0.173743 | 0.437759 | 0.377621 | HIF1A      | 1 |
| GO:00971 mesenchymal transition               | 1/272 | 13/18670  | 0.173743 | 0.437759 | 0.377621 | HIF1A      | 1 |
| GO:19002 regulation of transcription          | 1/272 | 13/18670  | 0.173743 | 0.437759 | 0.377621 | EIF2AK2    | 1 |
| GO:19023 negative regulation of transcription | 1/272 | 13/18670  | 0.173743 | 0.437759 | 0.377621 | HECW2      | 1 |
| GO:19028 negative regulation of transcription | 1/272 | 13/18670  | 0.173743 | 0.437759 | 0.377621 | HDAC4      | 1 |
| GO:19029 negative regulation of transcription | 1/272 | 13/18670  | 0.173743 | 0.437759 | 0.377621 | LRRK2      | 1 |
| GO:19049 positive regulation of transcription | 1/272 | 13/18670  | 0.173743 | 0.437759 | 0.377621 | HK2        | 1 |
| GO:19051 positive regulation of transcription | 1/272 | 13/18670  | 0.173743 | 0.437759 | 0.377621 | F2RL1      | 1 |
| GO:20000 negative regulation of transcription | 1/272 | 13/18670  | 0.173743 | 0.437759 | 0.377621 | PICALM     | 1 |
| GO:20010 positive regulation of transcription | 1/272 | 13/18670  | 0.173743 | 0.437759 | 0.377621 | DTX3L      | 1 |
| GO:20010 positive regulation of transcription | 1/272 | 13/18670  | 0.173743 | 0.437759 | 0.377621 | LRRK2      | 1 |
| GO:00063 postreplicative cell cycle arrest    | 2/272 | 52/18670  | 0.175276 | 0.440367 | 0.379871 | USP10/TRI  | 2 |
| GO:00083 endosome to lysosome transport       | 2/272 | 52/18670  | 0.175276 | 0.440367 | 0.379871 | AKTIP/DTX  | 2 |
| GO:00326 regulation of ion transport          | 2/272 | 52/18670  | 0.175276 | 0.440367 | 0.379871 | CLEC7A/TL  | 2 |
| GO:00481 regulation of response               | 2/272 | 52/18670  | 0.175276 | 0.440367 | 0.379871 | RAB3GAP1   | 2 |
| GO:00432 regulation of response               | 9/272 | 429/18670 | 0.175883 | 0.440768 | 0.380217 | CLEC7A/PF  | 9 |
| GO:00355 non-canonical translation            | 4/272 | 150/18670 | 0.175934 | 0.440768 | 0.380217 | PSMD12/T   | 4 |
| GO:00613 neural precursor cell development    | 4/272 | 150/18670 | 0.175934 | 0.440768 | 0.380217 | RAPGEF1/I  | 4 |
| GO:00717 response to filamentous phage        | 4/272 | 150/18670 | 0.175934 | 0.440768 | 0.380217 | POLR2J/SU  | 4 |
| GO:00158 amine transport                      | 3/272 | 100/18670 | 0.179043 | 0.445592 | 0.384378 | RGS2/RAB   | 3 |
| GO:00616 cytoskeleton-organism development    | 3/272 | 100/18670 | 0.179043 | 0.445592 | 0.384378 | UNC119/B   | 3 |
| GO:00508 antigen receptor activity            | 7/272 | 316/18670 | 0.179498 | 0.445592 | 0.384378 | PAK2/MNI   | 7 |
| GO:00301 regulation of response               | 5/272 | 205/18670 | 0.180285 | 0.445592 | 0.384378 | UNC119/F   | 5 |
| GO:00712 cellular response                    | 5/272 | 205/18670 | 0.180285 | 0.445592 | 0.384378 | LY96/TLR2  | 5 |
| GO:00076 visual behavior                      | 2/272 | 53/18670  | 0.180502 | 0.445592 | 0.384378 | HIF1A/NPT  | 2 |
| GO:00220 telencephalon development            | 2/272 | 53/18670  | 0.180502 | 0.445592 | 0.384378 | CDK5R1/LF  | 2 |
| GO:00380 p38MAPK cascade                      | 2/272 | 53/18670  | 0.180502 | 0.445592 | 0.384378 | GADD45G/   | 2 |
| GO:00433 response to death                    | 2/272 | 53/18670  | 0.180502 | 0.445592 | 0.384378 | IFIT1/NFKE | 2 |
| GO:00507 interleukin-1 signaling              | 2/272 | 53/18670  | 0.180502 | 0.445592 | 0.384378 | F2RL1/ORI  | 2 |
| GO:19024 L-alpha-aminocaproic acid            | 2/272 | 53/18670  | 0.180502 | 0.445592 | 0.384378 | RGS2/SLC3  | 2 |
| GO:19033 positive regulation of transcription | 2/272 | 53/18670  | 0.180502 | 0.445592 | 0.384378 | F2RL1/IL4F | 2 |
| GO:19055 macrophage development               | 2/272 | 53/18670  | 0.180502 | 0.445592 | 0.384378 | THBS1/CKI  | 2 |
| GO:00018 placenta development                 | 4/272 | 152/18670 | 0.1817   | 0.445592 | 0.384378 | PTGS2/MM   | 4 |
| GO:00072 spermatid development                | 4/272 | 152/18670 | 0.1817   | 0.445592 | 0.384378 | DLD/ROPN   | 4 |
| GO:00326 regulation of ion transport          | 4/272 | 152/18670 | 0.1817   | 0.445592 | 0.384378 | F2RL1/CLE  | 4 |
| GO:00356 cellular response                    | 9/272 | 433/18670 | 0.182474 | 0.445592 | 0.384378 | TXN/NKX3   | 9 |
| GO:00326 regulation of ion transport          | 3/272 | 101/18670 | 0.18268  | 0.445592 | 0.384378 | CLEC7A/FA  | 3 |
| GO:00466 alpha-beta T cell development        | 3/272 | 101/18670 | 0.18268  | 0.445592 | 0.384378 | IL4R/EOMI  | 3 |
| GO:00482 regulation of response               | 3/272 | 101/18670 | 0.18268  | 0.445592 | 0.384378 | UNC119/B   | 3 |
| GO:19030 organelle disassembly                | 3/272 | 101/18670 | 0.18268  | 0.445592 | 0.384378 | HK2/GOLG   | 3 |
| GO:19034 regulation of response               | 3/272 | 101/18670 | 0.18268  | 0.445592 | 0.384378 | PTGS2/CLE  | 3 |
| GO:00020 epithelial cell development          | 5/272 | 207/18670 | 0.185215 | 0.445592 | 0.384378 | F2RL1/RAF  | 5 |
| GO:00027 positive regulation of transcription | 2/272 | 54/18670  | 0.185751 | 0.445592 | 0.384378 | FADD/EVI2  | 2 |
| GO:00066 unsaturated fatty acid metabolism    | 2/272 | 54/18670  | 0.185751 | 0.445592 | 0.384378 | PTGS2/ALC  | 2 |
| GO:00070 metaphase/anaphase                   | 2/272 | 54/18670  | 0.185751 | 0.445592 | 0.384378 | TACC3/HEI  | 2 |

|                                                    |           |          |          |          |            |   |
|----------------------------------------------------|-----------|----------|----------|----------|------------|---|
| GO:006100: cell differentiation 2/272              | 54/18670  | 0.185751 | 0.445592 | 0.384378 | STAT1/MM   | 2 |
| GO:000923: cyclic nucleotide 1/272                 | 14/18670  | 0.185789 | 0.445592 | 0.384378 | PDE7A      | 1 |
| GO:001075: regulation of cell cycle 1/272          | 14/18670  | 0.185789 | 0.445592 | 0.384378 | THBS1      | 1 |
| GO:001075: regulation of cell cycle 1/272          | 14/18670  | 0.185789 | 0.445592 | 0.384378 | THBS1      | 1 |
| GO:001093: negative regulation of cell cycle 1/272 | 14/18670  | 0.185789 | 0.445592 | 0.384378 | HEBP2      | 1 |
| GO:001485: response to inhibition 1/272            | 14/18670  | 0.185789 | 0.445592 | 0.384378 | HDAC4      | 1 |
| GO:001903: viral translation 1/272                 | 14/18670  | 0.185789 | 0.445592 | 0.384378 | EIF2AK4    | 1 |
| GO:002004: hemoglobin maturation 1/272             | 14/18670  | 0.185789 | 0.445592 | 0.384378 | HIF1A      | 1 |
| GO:003024: hyaluronan biosynthesis 1/272           | 14/18670  | 0.185789 | 0.445592 | 0.384378 | ABCC5      | 1 |
| GO:003024: skeletal muscle 1/272                   | 14/18670  | 0.185789 | 0.445592 | 0.384378 | LMOD3      | 1 |
| GO:003083: positive regulation of cell cycle 1/272 | 14/18670  | 0.185789 | 0.445592 | 0.384378 | F2RL1      | 1 |
| GO:003123: regulation of cell cycle 1/272          | 14/18670  | 0.185789 | 0.445592 | 0.384378 | F2RL1      | 1 |
| GO:003268: negative regulation of cell cycle 1/272 | 14/18670  | 0.185789 | 0.445592 | 0.384378 | PPM1B      | 1 |
| GO:004314: snoRNA processing 1/272                 | 14/18670  | 0.185789 | 0.445592 | 0.384378 | EXOSC3     | 1 |
| GO:004333: CD8-positive, T-helper 1 1/272          | 14/18670  | 0.185789 | 0.445592 | 0.384378 | EOMES      | 1 |
| GO:004405: positive regulation of cell cycle 1/272 | 14/18670  | 0.185789 | 0.445592 | 0.384378 | RAB3GAP1   | 1 |
| GO:004454: NLRP3 inflammasome 1/272                | 14/18670  | 0.185789 | 0.445592 | 0.384378 | EIF2AK2    | 1 |
| GO:004521: cell-cell junction 1/272                | 14/18670  | 0.185789 | 0.445592 | 0.384378 | F2RL1      | 1 |
| GO:004561: positive regulation of cell cycle 1/272 | 14/18670  | 0.185789 | 0.445592 | 0.384378 | FADD       | 1 |
| GO:004681: inositol phosphate 1/272                | 14/18670  | 0.185789 | 0.445592 | 0.384378 | SYNJ2      | 1 |
| GO:004821: behavioral response 1/272               | 14/18670  | 0.185789 | 0.445592 | 0.384378 | THBS1      | 1 |
| GO:004830: organelle inheritance 1/272             | 14/18670  | 0.185789 | 0.445592 | 0.384378 | GOLGA2     | 1 |
| GO:004830: Golgi inheritance 1/272                 | 14/18670  | 0.185789 | 0.445592 | 0.384378 | GOLGA2     | 1 |
| GO:005191: regulation of cell cycle 1/272          | 14/18670  | 0.185789 | 0.445592 | 0.384378 | THBS1      | 1 |
| GO:006000: Sertoli cell development 1/272          | 14/18670  | 0.185789 | 0.445592 | 0.384378 | ARID4A     | 1 |
| GO:006000: regulation of cell cycle 1/272          | 14/18670  | 0.185789 | 0.445592 | 0.384378 | GOLGA2     | 1 |
| GO:006041: positive regulation of cell cycle 1/272 | 14/18670  | 0.185789 | 0.445592 | 0.384378 | RGS2       | 1 |
| GO:007251: chemokine (C-C motif) 1/272             | 14/18670  | 0.185789 | 0.445592 | 0.384378 | F2RL1      | 1 |
| GO:009720: activation of cell cycle 1/272          | 14/18670  | 0.185789 | 0.445592 | 0.384378 | FADD       | 1 |
| GO:190161: regulation of cell cycle 1/272          | 14/18670  | 0.185789 | 0.445592 | 0.384378 | CDH2       | 1 |
| GO:190204: positive regulation of cell cycle 1/272 | 14/18670  | 0.185789 | 0.445592 | 0.384378 | THBS1      | 1 |
| GO:190491: regulation of cell cycle 1/272          | 14/18670  | 0.185789 | 0.445592 | 0.384378 | HK2        | 1 |
| GO:190504: negative regulation of cell cycle 1/272 | 14/18670  | 0.185789 | 0.445592 | 0.384378 | PICALM     | 1 |
| GO:200034: regulation of cell cycle 1/272          | 14/18670  | 0.185789 | 0.445592 | 0.384378 | SULF2      | 1 |
| GO:200104: regulation of cell cycle 1/272          | 14/18670  | 0.185789 | 0.445592 | 0.384378 | BST1       | 1 |
| GO:200121: regulation of cell cycle 1/272          | 14/18670  | 0.185789 | 0.445592 | 0.384378 | RAP1A      | 1 |
| GO:200121: regulation of cell cycle 1/272          | 14/18670  | 0.185789 | 0.445592 | 0.384378 | PTGS2      | 1 |
| GO:000690: vesicle budding 3/272                   | 102/18670 | 0.186336 | 0.446602 | 0.385249 | GOLPH3/G   | 3 |
| GO:199084: adaptive thermogenesis 4/272            | 154/18670 | 0.187529 | 0.449156 | 0.387452 | GADD45G,   | 4 |
| GO:000751: aging 7/272                             | 321/18670 | 0.189315 | 0.453102 | 0.390856 | DLD/PTGS2  | 7 |
| GO:003268: regulation of cell cycle 3/272          | 103/18670 | 0.190012 | 0.453102 | 0.390856 | MNDA/CLF   | 3 |
| GO:004421: cellular polysaccharide 3/272           | 103/18670 | 0.190012 | 0.453102 | 0.390856 | PYGL/IRS2, | 3 |
| GO:190521: positive regulation of cell cycle 3/272 | 103/18670 | 0.190012 | 0.453102 | 0.390856 | RPS6KA5/J  | 3 |
| GO:004222: response to cell cycle 2/272            | 55/18670  | 0.191022 | 0.453102 | 0.390856 | FADD/ABA   | 2 |
| GO:004641: icosanoid biosynthesis 2/272            | 55/18670  | 0.191022 | 0.453102 | 0.390856 | PTGS2/ALC  | 2 |
| GO:006100: positive regulation of cell cycle 2/272 | 55/18670  | 0.191022 | 0.453102 | 0.390856 | PAK2/UNC   | 2 |
| GO:009711: receptor localisation 2/272             | 55/18670  | 0.191022 | 0.453102 | 0.390856 | RAP1A/NP   | 2 |
| GO:004351: regulation of cell cycle 5/272          | 210/18670 | 0.192702 | 0.453102 | 0.390856 | SRPK2/NQ   | 5 |

|                                  |           |          |          |          |            |   |
|----------------------------------|-----------|----------|----------|----------|------------|---|
| GO:00072: neuropeptide 3/272     | 104/1867C | 0.193707 | 0.453102 | 0.390856 | LTB4R/CYS  | 3 |
| GO:00109: negative regul 3/272   | 104/1867C | 0.193707 | 0.453102 | 0.390856 | LMTK2/PH   | 3 |
| GO:00468: regulation of r 3/272  | 104/1867C | 0.193707 | 0.453102 | 0.390856 | TXN/PTGS:  | 3 |
| GO:00718: leukocyte apo 3/272    | 104/1867C | 0.193707 | 0.453102 | 0.390856 | FADD/HIF1  | 3 |
| GO:00007: syncytium for 2/272    | 56/18670  | 0.196312 | 0.453102 | 0.390856 | SCGB3A1/I  | 2 |
| GO:00218: forebrain cell 2/272   | 56/18670  | 0.196312 | 0.453102 | 0.390856 | CDK5R1/LF  | 2 |
| GO:00312: T cell costimul 2/272  | 56/18670  | 0.196312 | 0.453102 | 0.390856 | PAK2/TNF:  | 2 |
| GO:00447: metaphase/ar 2/272     | 56/18670  | 0.196312 | 0.453102 | 0.390856 | TACC3/HE   | 2 |
| GO:00484: synaptic vesicl 2/272  | 56/18670  | 0.196312 | 0.453102 | 0.390856 | LRRK2/PIC. | 2 |
| GO:00508: multicellular c 2/272  | 56/18670  | 0.196312 | 0.453102 | 0.390856 | TNNI2/RCS  | 2 |
| GO:00508: musculoskelet 2/272    | 56/18670  | 0.196312 | 0.453102 | 0.390856 | TNNI2/RCS  | 2 |
| GO:00901: regulation of l 2/272  | 56/18670  | 0.196312 | 0.453102 | 0.390856 | STAT1/MM   | 2 |
| GO:01402: presynaptic er 2/272   | 56/18670  | 0.196312 | 0.453102 | 0.390856 | LRRK2/PIC. | 2 |
| GO:01402: cell-cell fusion 2/272 | 56/18670  | 0.196312 | 0.453102 | 0.390856 | SCGB3A1/I  | 2 |
| GO:00198: stem cell popul 4/272  | 157/1867C | 0.196383 | 0.453102 | 0.390856 | POLR2J/EC  | 4 |
| GO:00305: BMP signaling 4/272    | 157/1867C | 0.196383 | 0.453102 | 0.390856 | USP15/TOI  | 4 |
| GO:00066: acyl-CoA meta 3/272    | 105/1867C | 0.197419 | 0.453102 | 0.390856 | DLD/ACSL1  | 3 |
| GO:00320: regulation of l 3/272  | 105/1867C | 0.197419 | 0.453102 | 0.390856 | GOLPH3/R   | 3 |
| GO:00331: positive regul 3/272   | 105/1867C | 0.197419 | 0.453102 | 0.390856 | TXN/PTGS:  | 3 |
| GO:00353: thioester met: 3/272   | 105/1867C | 0.197419 | 0.453102 | 0.390856 | DLD/ACSL1  | 3 |
| GO:19027: negative regul 3/272   | 105/1867C | 0.197419 | 0.453102 | 0.390856 | PSMD12/P   | 3 |
| GO:00017: endodermal c 1/272     | 15/18670  | 0.19766  | 0.453102 | 0.390856 | EOMES      | 1 |
| GO:00018: trophectoderr 1/272    | 15/18670  | 0.19766  | 0.453102 | 0.390856 | EOMES      | 1 |
| GO:00024: germinal cent: 1/272   | 15/18670  | 0.19766  | 0.453102 | 0.390856 | TNFSF13B   | 1 |
| GO:00060: fructose meta 1/272    | 15/18670  | 0.19766  | 0.453102 | 0.390856 | PFKFB2     | 1 |
| GO:00075: adult heart de 1/272   | 15/18670  | 0.19766  | 0.453102 | 0.390856 | CHD7       | 1 |
| GO:00107: positive regul 1/272   | 15/18670  | 0.19766  | 0.453102 | 0.390856 | THBS1      | 1 |
| GO:00148: response to st 1/272   | 15/18670  | 0.19766  | 0.453102 | 0.390856 | HDAC4      | 1 |
| GO:00182: protein-chrom 1/272    | 15/18670  | 0.19766  | 0.453102 | 0.390856 | RGR        | 1 |
| GO:00307: sequestering c 1/272   | 15/18670  | 0.19766  | 0.453102 | 0.390856 | OSBPL8     | 1 |
| GO:00308: regulation of ξ 1/272  | 15/18670  | 0.19766  | 0.453102 | 0.390856 | EVI2B      | 1 |
| GO:00323: positive regul 1/272   | 15/18670  | 0.19766  | 0.453102 | 0.390856 | HIF1A      | 1 |
| GO:00326: regulation of ξ 1/272  | 15/18670  | 0.19766  | 0.453102 | 0.390856 | IL18       | 1 |
| GO:00327: positive regul 1/272   | 15/18670  | 0.19766  | 0.453102 | 0.390856 | IL17RA     | 1 |
| GO:00330: positive regul 1/272   | 15/18670  | 0.19766  | 0.453102 | 0.390856 | IL4R       | 1 |
| GO:00336: negative regul 1/272   | 15/18670  | 0.19766  | 0.453102 | 0.390856 | ABAT       | 1 |
| GO:00336: negative regul 1/272   | 15/18670  | 0.19766  | 0.453102 | 0.390856 | EIF2AK2    | 1 |
| GO:00341: negative regul 1/272   | 15/18670  | 0.19766  | 0.453102 | 0.390856 | ABAT       | 1 |
| GO:00433: positive regul 1/272   | 15/18670  | 0.19766  | 0.453102 | 0.390856 | IL4R       | 1 |
| GO:00435: positive regul 1/272   | 15/18670  | 0.19766  | 0.453102 | 0.390856 | RPL26      | 1 |
| GO:00435: nose developr 1/272    | 15/18670  | 0.19766  | 0.453102 | 0.390856 | CHD7       | 1 |
| GO:00436: engulfment of 1/272    | 15/18670  | 0.19766  | 0.453102 | 0.390856 | THBS1      | 1 |
| GO:00458: negative regul 1/272   | 15/18670  | 0.19766  | 0.453102 | 0.390856 | HEBP2      | 1 |
| GO:00463: positive regul 1/272   | 15/18670  | 0.19766  | 0.453102 | 0.390856 | IRS2       | 1 |
| GO:00468: phosphorylate 1/272    | 15/18670  | 0.19766  | 0.453102 | 0.390856 | SYNJ2      | 1 |
| GO:00481: regulation of ε 1/272  | 15/18670  | 0.19766  | 0.453102 | 0.390856 | RAB3GAP1   | 1 |
| GO:00600: regulation of ρ 1/272  | 15/18670  | 0.19766  | 0.453102 | 0.390856 | F2RL1      | 1 |
| GO:00601: prepulse inhib 1/272   | 15/18670  | 0.19766  | 0.453102 | 0.390856 | CHD8       | 1 |



|                                 |           |          |          |          |            |   |
|---------------------------------|-----------|----------|----------|----------|------------|---|
| GO:00705: negative regul1/272   | 15/18670  | 0.19766  | 0.453102 | 0.390856 | MAP4K4     | 1 |
| GO:00710: RNA surveillar 1/272  | 15/18670  | 0.19766  | 0.453102 | 0.390856 | EXOSC3     | 1 |
| GO:00714: cellular hyperc1/272  | 15/18670  | 0.19766  | 0.453102 | 0.390856 | RCSD1      | 1 |
| GO:00720: metanephric r1/272    | 15/18670  | 0.19766  | 0.453102 | 0.390856 | STAT1      | 1 |
| GO:00721: nephron tubul1/272    | 15/18670  | 0.19766  | 0.453102 | 0.390856 | STAT1      | 1 |
| GO:00722: metanephric r1/272    | 15/18670  | 0.19766  | 0.453102 | 0.390856 | STAT1      | 1 |
| GO:00901: positive regul:1/272  | 15/18670  | 0.19766  | 0.453102 | 0.390856 | IL4R       | 1 |
| GO:19021: negative regul1/272   | 15/18670  | 0.19766  | 0.453102 | 0.390856 | TRIM25     | 1 |
| GO:19058: regulation of r1/272  | 15/18670  | 0.19766  | 0.453102 | 0.390856 | CDH2       | 1 |
| GO:19035: negative regul5/272   | 212/18670 | 0.197752 | 0.453102 | 0.390856 | F2RL1/SRC  | 5 |
| GO:00485: spermatid diff4/272   | 158/18670 | 0.199363 | 0.456497 | 0.393785 | DLD/ROPN   | 4 |
| GO:00024: T cell mediate3/272   | 106/18670 | 0.201148 | 0.458404 | 0.39543  | B2M/FADL   | 3 |
| GO:00070: lysosomal trar3/272   | 106/18670 | 0.201148 | 0.458404 | 0.39543  | AKTIP/LRR  | 3 |
| GO:00070: mitotic spindl3/272   | 106/18670 | 0.201148 | 0.458404 | 0.39543  | TACC3/GO   | 3 |
| GO:00091: nucleoside m3/272     | 106/18670 | 0.201148 | 0.458404 | 0.39543  | UPB1/NT5   | 3 |
| GO:00519: regulation of s3/272  | 106/18670 | 0.201148 | 0.458404 | 0.39543  | NTNG2/TU   | 3 |
| GO:19016: alpha-amino a3/272    | 106/18670 | 0.201148 | 0.458404 | 0.39543  | DLD/HAL/F  | 3 |
| GO:00028: regulation of r2/272  | 57/18670  | 0.20162  | 0.458404 | 0.39543  | F2RL1/IL4F | 2 |
| GO:00109: regulation of r2/272  | 57/18670  | 0.20162  | 0.458404 | 0.39543  | TACC3/HE   | 2 |
| GO:00193: hexose catabc2/272    | 57/18670  | 0.20162  | 0.458404 | 0.39543  | PFKFB2/HK  | 2 |
| GO:00312: lymphocyte cc2/272    | 57/18670  | 0.20162  | 0.458404 | 0.39543  | PAK2/TNF   | 2 |
| GO:00611: regulation of i2/272  | 57/18670  | 0.20162  | 0.458404 | 0.39543  | HIF1A/MA   | 2 |
| GO:00987: maintenance c4/272    | 159/18670 | 0.202356 | 0.458904 | 0.395861 | POLR2J/EC  | 4 |
| GO:00108: regulation of c5/272  | 215/18670 | 0.205412 | 0.458904 | 0.395861 | PLAU/THB   | 5 |
| GO:00703: positive regul:5/272  | 215/18670 | 0.205412 | 0.458904 | 0.395861 | F2RL1/RAF  | 5 |
| GO:00712: cellular respor5/272  | 215/18670 | 0.205412 | 0.458904 | 0.395861 | PTGS2/B2I  | 5 |
| GO:00069: syncytium for:2/272   | 58/18670  | 0.206945 | 0.458904 | 0.395861 | SCGB3A1/I  | 2 |
| GO:00106: positive regul:2/272  | 58/18670  | 0.206945 | 0.458904 | 0.395861 | PFKFB2/IR  | 2 |
| GO:00359: aorta develop2/272    | 58/18670  | 0.206945 | 0.458904 | 0.395861 | NKX3-1/CF  | 2 |
| GO:00420: T-helper cell d2/272  | 58/18670  | 0.206945 | 0.458904 | 0.395861 | IL4R/IL18  | 2 |
| GO:00609: dendritic spin:2/272  | 58/18670  | 0.206945 | 0.458904 | 0.395861 | CDK5R1/LF  | 2 |
| GO:00989: axonal transpr:2/272  | 58/18670  | 0.206945 | 0.458904 | 0.395861 | KIF1B/HIF1 | 2 |
| GO:00016: urogenital sys7/272   | 330/18670 | 0.207521 | 0.458904 | 0.395861 | NKX3-1/SL  | 7 |
| GO:00025: acute inflamr3/272    | 108/18670 | 0.208656 | 0.458904 | 0.395861 | PTGS2/S1C  | 3 |
| GO:00600: Wnt signaling3/272    | 108/18670 | 0.208656 | 0.458904 | 0.395861 | PSMD12/P   | 3 |
| GO:00995: chemical syna3/272    | 108/18670 | 0.208656 | 0.458904 | 0.395861 | RAB3GAP1   | 3 |
| GO:00019: renal system r1/272   | 16/18670  | 0.209359 | 0.458904 | 0.395861 | F2RL1      | 1 |
| GO:00020: epithelial cell1/272  | 16/18670  | 0.209359 | 0.458904 | 0.395861 | HIF1A      | 1 |
| GO:00027: regulation of c1/272  | 16/18670  | 0.209359 | 0.458904 | 0.395861 | F2RL1      | 1 |
| GO:00032: ventricular tra1/272  | 16/18670  | 0.209359 | 0.458904 | 0.395861 | CHD7       | 1 |
| GO:00060: acetyl-CoA bic1/272   | 16/18670  | 0.209359 | 0.458904 | 0.395861 | DLD        | 1 |
| GO:00061: (2-oxoglutarat:1/272  | 16/18670  | 0.209359 | 0.458904 | 0.395861 | DLD        | 1 |
| GO:00071: neuron cell-ce1/272   | 16/18670  | 0.209359 | 0.458904 | 0.395861 | CDK5R1     | 1 |
| GO:00108: positive regul:1/272  | 16/18670  | 0.209359 | 0.458904 | 0.395861 | NFKBIA     | 1 |
| GO:00140: regulation of xi1/272 | 16/18670  | 0.209359 | 0.458904 | 0.395861 | RAB3GAP1   | 1 |
| GO:00148: skeletal myofi1/272   | 16/18670  | 0.209359 | 0.458904 | 0.395861 | LMOD3      | 1 |
| GO:00160: snoRNA metal1/272     | 16/18670  | 0.209359 | 0.458904 | 0.395861 | EXOSC3     | 1 |
| GO:00189: ether metabo1/272     | 16/18670  | 0.209359 | 0.458904 | 0.395861 | TXN        | 1 |

|                                                          |           |          |          |          |              |   |
|----------------------------------------------------------|-----------|----------|----------|----------|--------------|---|
| GO:00302: growth hormone receptor signaling pathway      | 16/18670  | 0.209359 | 0.458904 | 0.395861 | CHD7         | 1 |
| GO:00308: negative regulation of cell growth             | 16/18670  | 0.209359 | 0.458904 | 0.395861 | MNDA         | 1 |
| GO:00312: pseudopodium morphogenesis                     | 16/18670  | 0.209359 | 0.458904 | 0.395861 | F2RL1        | 1 |
| GO:00322: regulation of cell growth                      | 16/18670  | 0.209359 | 0.458904 | 0.395861 | PTGS2        | 1 |
| GO:00326: granulocyte chemotaxis                         | 16/18670  | 0.209359 | 0.458904 | 0.395861 | IL18         | 1 |
| GO:00326: negative regulation of cell growth             | 16/18670  | 0.209359 | 0.458904 | 0.395861 | THBS1        | 1 |
| GO:00343: regulation of cell growth                      | 16/18670  | 0.209359 | 0.458904 | 0.395861 | GMFG         | 1 |
| GO:00359: peptidyl-threonine phosphorylation             | 16/18670  | 0.209359 | 0.458904 | 0.395861 | PPM1B        | 1 |
| GO:00361: histone H3-K9 cross-link formation             | 16/18670  | 0.209359 | 0.458904 | 0.395861 | ARID4A       | 1 |
| GO:00420: chemokine binding                              | 16/18670  | 0.209359 | 0.458904 | 0.395861 | IL18         | 1 |
| GO:00424: hormone catabolism                             | 16/18670  | 0.209359 | 0.458904 | 0.395861 | HSD17B11     | 1 |
| GO:00432: sodium-independent transport                   | 16/18670  | 0.209359 | 0.458904 | 0.395861 | SLCO4C1      | 1 |
| GO:00448: modulation by protein tyrosine phosphorylation | 16/18670  | 0.209359 | 0.458904 | 0.395861 | EIF2AK4      | 1 |
| GO:00456: negative regulation of cell growth             | 16/18670  | 0.209359 | 0.458904 | 0.395861 | IL4R         | 1 |
| GO:00459: positive regulation of cell growth             | 16/18670  | 0.209359 | 0.458904 | 0.395861 | RGS2         | 1 |
| GO:00465: sphingoid metabolism                           | 16/18670  | 0.209359 | 0.458904 | 0.395861 | ASAH1        | 1 |
| GO:00507: chemokine receptor signaling pathway           | 16/18670  | 0.209359 | 0.458904 | 0.395861 | IL18         | 1 |
| GO:00551: relaxation of cell growth                      | 16/18670  | 0.209359 | 0.458904 | 0.395861 | RGS2         | 1 |
| GO:00606: regulation of cell growth                      | 16/18670  | 0.209359 | 0.458904 | 0.395861 | LRRK2        | 1 |
| GO:00705: dendrite self-organization                     | 16/18670  | 0.209359 | 0.458904 | 0.395861 | NPTN         | 1 |
| GO:00715: inositol phosphate metabolism                  | 16/18670  | 0.209359 | 0.458904 | 0.395861 | SYNJ2        | 1 |
| GO:00717: endoplasmic reticulum protein import           | 16/18670  | 0.209359 | 0.458904 | 0.395861 | RAB3GAP1     | 1 |
| GO:00801: histone H3-K4 cross-link formation             | 16/18670  | 0.209359 | 0.458904 | 0.395861 | ARID4A       | 1 |
| GO:00861: G protein-coupled receptor signaling pathway   | 16/18670  | 0.209359 | 0.458904 | 0.395861 | RGS2         | 1 |
| GO:00903: regulation of cell growth                      | 16/18670  | 0.209359 | 0.458904 | 0.395861 | PTGS2        | 1 |
| GO:00970: synaptic vesicle transport                     | 16/18670  | 0.209359 | 0.458904 | 0.395861 | CDH2         | 1 |
| GO:19002: regulation of cell growth                      | 16/18670  | 0.209359 | 0.458904 | 0.395861 | LRRK2        | 1 |
| GO:19023: sulfate transport                              | 16/18670  | 0.209359 | 0.458904 | 0.395861 | SLC26A8      | 1 |
| GO:19029: negative regulation of cell growth             | 16/18670  | 0.209359 | 0.458904 | 0.395861 | PICALM       | 1 |
| GO:19051: regulation of cell growth                      | 16/18670  | 0.209359 | 0.458904 | 0.395861 | F2RL1        | 1 |
| GO:19900: amyloid fibril formation                       | 16/18670  | 0.209359 | 0.458904 | 0.395861 | B2M          | 1 |
| GO:20003: regulation of cell growth                      | 16/18670  | 0.209359 | 0.458904 | 0.395861 | UNC119       | 1 |
| GO:00147: striated muscle cell growth                    | 390/18670 | 0.210406 | 0.460914 | 0.397595 | IFRD1/SAP    | 8 |
| GO:00076: phototransduction                              | 59/18670  | 0.212284 | 0.463634 | 0.399941 | RGR/UNC1     | 2 |
| GO:00977: positive regulation of cell growth             | 59/18670  | 0.212284 | 0.463634 | 0.399941 | F2RL1/RGS2   | 2 |
| GO:01201: steroid hormone receptor signaling pathway     | 59/18670  | 0.212284 | 0.463634 | 0.399941 | HSD17B11     | 2 |
| GO:00016: long-chain fatty acid metabolism               | 109/18670 | 0.212433 | 0.463634 | 0.399941 | PTGS2/ACSL1  | 3 |
| GO:00217: limbic system                                  | 109/18670 | 0.212433 | 0.463634 | 0.399941 | CDK5R1/RGS2  | 3 |
| GO:00512: protein dephosphorylation                      | 109/18670 | 0.212433 | 0.463634 | 0.399941 | F2RL1/LMO1   | 3 |
| GO:00511: import into nucleus                            | 163/18670 | 0.214461 | 0.467483 | 0.403262 | PTGS2/RPL10A | 4 |
| GO:00991: postsynaptic cell growth                       | 163/18670 | 0.214461 | 0.467483 | 0.403262 | NTNG2/CDK5R1 | 4 |
| GO:00075: response to nutrient                           | 219/18670 | 0.215776 | 0.468509 | 0.404146 | PTGS2/ACSL1  | 5 |
| GO:00325: DNA duplex unwinding                           | 110/18670 | 0.216226 | 0.468509 | 0.404146 | CHD7/MCF1    | 3 |
| GO:00469: cellular transport                             | 110/18670 | 0.216226 | 0.468509 | 0.404146 | S100A9/S100B | 3 |
| GO:00613: regulation of cell growth                      | 110/18670 | 0.216226 | 0.468509 | 0.404146 | IFRD1/TNFR1  | 3 |
| GO:00901: regulation of cell growth                      | 110/18670 | 0.216226 | 0.468509 | 0.404146 | PSMD12/P     | 3 |
| GO:00022: CD4-positive cell growth                       | 60/18670  | 0.217637 | 0.468509 | 0.404146 | IL4R/IL18    | 2 |
| GO:00181: peptide cross-link formation                   | 60/18670  | 0.217637 | 0.468509 | 0.404146 | THBS1/TGFB   | 2 |

|                                                                |           |          |          |          |            |   |
|----------------------------------------------------------------|-----------|----------|----------|----------|------------|---|
| GO:004557: mast cell activation 2/272                          | 60/18670  | 0.217637 | 0.468509 | 0.404146 | IL4R/S100/ | 2 |
| GO:004617: purine ribonucleotide biosynthesis 2/272            | 60/18670  | 0.217637 | 0.468509 | 0.404146 | NT5C2/LRF  | 2 |
| GO:005130: mitotic sister chromatid separation 2/272           | 60/18670  | 0.217637 | 0.468509 | 0.404146 | TACC3/HEC1 | 2 |
| GO:005185: regulation of fatty acid metabolism 2/272           | 60/18670  | 0.217637 | 0.468509 | 0.404146 | THBS1/MA   | 2 |
| GO:009010: regulation of cell growth 2/272                     | 60/18670  | 0.217637 | 0.468509 | 0.404146 | THBS1/MA   | 2 |
| GO:015010: regulation of cell growth 2/272                     | 60/18670  | 0.217637 | 0.468509 | 0.404146 | THBS1/MA   | 2 |
| GO:000633: chromatin remodeling 5/272                          | 220/18670 | 0.218393 | 0.468509 | 0.404146 | HDAC4/CH   | 5 |
| GO:003530: negative regulation of cell growth 3/272            | 111/18670 | 0.220032 | 0.468509 | 0.404146 | LMTK2/PH   | 3 |
| GO:000265: positive regulation of cell growth 1/272            | 17/18670  | 0.220887 | 0.468509 | 0.404146 | FADD       | 1 |
| GO:000697: DNA damage response 1/272                           | 17/18670  | 0.220887 | 0.468509 | 0.404146 | RPL26      | 1 |
| GO:000734: fusion of sperm 1/272                               | 17/18670  | 0.220887 | 0.468509 | 0.404146 | FOLR3      | 1 |
| GO:000763: chemosensory response 1/272                         | 17/18670  | 0.220887 | 0.468509 | 0.404146 | CHD7       | 1 |
| GO:000827: sulfate transport 1/272                             | 17/18670  | 0.220887 | 0.468509 | 0.404146 | SLC26A8    | 1 |
| GO:000834: determination 1/272                                 | 17/18670  | 0.220887 | 0.468509 | 0.404146 | LRRK2      | 1 |
| GO:001022: response to UV 1/272                                | 17/18670  | 0.220887 | 0.468509 | 0.404146 | MME        | 1 |
| GO:001074: positive regulation of cell growth 1/272            | 17/18670  | 0.220887 | 0.468509 | 0.404146 | IL18       | 1 |
| GO:001708: response to injury 1/272                            | 17/18670  | 0.220887 | 0.468509 | 0.404146 | KIF1B      | 1 |
| GO:003000: maintenance of cell growth 1/272                    | 17/18670  | 0.220887 | 0.468509 | 0.404146 | ARPC5      | 1 |
| GO:003054: female genital development 1/272                    | 17/18670  | 0.220887 | 0.468509 | 0.404146 | CHD7       | 1 |
| GO:003120: pseudopodium formation 1/272                        | 17/18670  | 0.220887 | 0.468509 | 0.404146 | F2RL1      | 1 |
| GO:003274: positive regulation of cell growth 1/272            | 17/18670  | 0.220887 | 0.468509 | 0.404146 | IL18       | 1 |
| GO:003290: negative regulation of cell growth 1/272            | 17/18670  | 0.220887 | 0.468509 | 0.404146 | RAP1A      | 1 |
| GO:004290: lipoprotein transport 1/272                         | 17/18670  | 0.220887 | 0.468509 | 0.404146 | UNC119     | 1 |
| GO:004295: cytoplasmic secretion 1/272                         | 17/18670  | 0.220887 | 0.468509 | 0.404146 | NFKBIA     | 1 |
| GO:004360: linoleic acid metabolism 1/272                      | 17/18670  | 0.220887 | 0.468509 | 0.404146 | ACSL1      | 1 |
| GO:004390: histone H2A acetylation 1/272                       | 17/18670  | 0.220887 | 0.468509 | 0.404146 | EPC1       | 1 |
| GO:004487: lipoprotein localization 1/272                      | 17/18670  | 0.220887 | 0.468509 | 0.404146 | UNC119     | 1 |
| GO:004507: regulation of immunity 1/272                        | 17/18670  | 0.220887 | 0.468509 | 0.404146 | CLEC7A     | 1 |
| GO:004572: positive regulation of cell growth 1/272            | 17/18670  | 0.220887 | 0.468509 | 0.404146 | IRS2       | 1 |
| GO:004833: mitochondrion organization 1/272                    | 17/18670  | 0.220887 | 0.468509 | 0.404146 | LRRK2      | 1 |
| GO:004853: lymph node development 1/272                        | 17/18670  | 0.220887 | 0.468509 | 0.404146 | FADD       | 1 |
| GO:006000: inhibitory positive regulation of cell growth 1/272 | 17/18670  | 0.220887 | 0.468509 | 0.404146 | ABAT       | 1 |
| GO:006064: mammary gland development 1/272                     | 17/18670  | 0.220887 | 0.468509 | 0.404146 | HIF1A      | 1 |
| GO:006120: retina vasculature development 1/272                | 17/18670  | 0.220887 | 0.468509 | 0.404146 | HIF1A      | 1 |
| GO:007024: thymocyte apoptosis 1/272                           | 17/18670  | 0.220887 | 0.468509 | 0.404146 | HIF1A      | 1 |
| GO:007130: cellular response 1/272                             | 17/18670  | 0.220887 | 0.468509 | 0.404146 | IFIT1      | 1 |
| GO:009900: modification of cell growth 1/272                   | 17/18670  | 0.220887 | 0.468509 | 0.404146 | PFN2       | 1 |
| GO:190533: negative regulation of cell growth 1/272            | 17/18670  | 0.220887 | 0.468509 | 0.404146 | STAT1      | 1 |
| GO:000008: G1/S transition 6/272                               | 279/18670 | 0.222819 | 0.469897 | 0.405344 | ARID3A/G/  | 6 |
| GO:000704: lysosome organization 2/272                         | 61/18670  | 0.223002 | 0.469897 | 0.405344 | AKTIP/LRR  | 2 |
| GO:000740: neuroblast proliferation 2/272                      | 61/18670  | 0.223002 | 0.469897 | 0.405344 | HIF1A/LRR  | 2 |
| GO:001080: regulation of transcription 2/272                   | 61/18670  | 0.223002 | 0.469897 | 0.405344 | F2RL1/RFF  | 2 |
| GO:003233: positive regulation of cell growth 2/272            | 61/18670  | 0.223002 | 0.469897 | 0.405344 | NKX3-1/NF  | 2 |
| GO:004470: multi-organism development 2/272                    | 61/18670  | 0.223002 | 0.469897 | 0.405344 | IFIT1/RAE1 | 2 |
| GO:005070: interleukin-1 signaling 2/272                       | 61/18670  | 0.223002 | 0.469897 | 0.405344 | F2RL1/ORI  | 2 |
| GO:008017: lytic vacuole organization 2/272                    | 61/18670  | 0.223002 | 0.469897 | 0.405344 | AKTIP/LRR  | 2 |
| GO:009030: positive regulation of cell growth 2/272            | 61/18670  | 0.223002 | 0.469897 | 0.405344 | THBS1/CLE  | 2 |
| GO:190257: multi-organism development 2/272                    | 61/18670  | 0.223002 | 0.469897 | 0.405344 | IFIT1/RAE1 | 2 |

|                                 |           |          |          |          |            |   |
|---------------------------------|-----------|----------|----------|----------|------------|---|
| GO:20005: regulation of (2/272  | 61/18670  | 0.223002 | 0.469897 | 0.405344 | IL4R/IL18  | 2 |
| GO:00447: multi-multicel 5/272  | 222/18670 | 0.223655 | 0.47029  | 0.405683 | PTGS2/PSC  | 5 |
| GO:00902: negative regul 4/272  | 166/18670 | 0.223669 | 0.47029  | 0.405683 | SULF2/TOE  | 4 |
| GO:00109: regulation of ξ 3/272 | 112/18670 | 0.223853 | 0.47029  | 0.405683 | PFKFB2/IRI | 3 |
| GO:00159: sterol transpo 3/272  | 112/18670 | 0.223853 | 0.47029  | 0.405683 | NFKBIA/OS  | 3 |
| GO:19038: negative regul 3/272  | 112/18670 | 0.223853 | 0.47029  | 0.405683 | TXN/LRRK2  | 3 |
| GO:00358: modulation of 3/272   | 113/18670 | 0.227686 | 0.47414  | 0.409004 | EIF2AK2/S  | 3 |
| GO:00432: regulation of ρ 3/272 | 113/18670 | 0.227686 | 0.47414  | 0.409004 | F2RL1/LMO  | 3 |
| GO:00486: negative regul 3/272  | 113/18670 | 0.227686 | 0.47414  | 0.409004 | IFRD1/RGS  | 3 |
| GO:00323: negative regul 2/272  | 62/18670  | 0.228377 | 0.47414  | 0.409004 | TXN/LRRK2  | 2 |
| GO:00326: interleukin-2 ρ 2/272 | 62/18670  | 0.228377 | 0.47414  | 0.409004 | CLEC7A/IL  | 2 |
| GO:00466: positive regul: 2/272 | 62/18670  | 0.228377 | 0.47414  | 0.409004 | IL4R/IL18  | 2 |
| GO:19058: regulation of ς 2/272 | 62/18670  | 0.228377 | 0.47414  | 0.409004 | TACC3/HEC  | 2 |
| GO:19901: neuron projec 4/272   | 168/18670 | 0.229864 | 0.47414  | 0.409004 | IFRD1/TNF  | 4 |
| GO:00059: polysaccharid: 3/272  | 114/18670 | 0.231532 | 0.47414  | 0.409004 | PYGL/IRS2  | 3 |
| GO:00106: negative regul 3/272  | 114/18670 | 0.231532 | 0.47414  | 0.409004 | THBS1/PFN  | 3 |
| GO:00302: bone minerali 3/272   | 114/18670 | 0.231532 | 0.47414  | 0.409004 | PTGS2/SRC  | 3 |
| GO:00420: regulation of ς 3/272 | 114/18670 | 0.231532 | 0.47414  | 0.409004 | THBS1/CLE  | 3 |
| GO:00454: endothelial ce 3/272  | 114/18670 | 0.231532 | 0.47414  | 0.409004 | F2RL1/RAF  | 3 |
| GO:00029: regulation of ϑ 1/272 | 18/18670  | 0.232248 | 0.47414  | 0.409004 | IRS2       | 1 |
| GO:00063: regulation of ξ 1/272 | 18/18670  | 0.232248 | 0.47414  | 0.409004 | ARID4A     | 1 |
| GO:00072: positive regul: 1/272 | 18/18670  | 0.232248 | 0.47414  | 0.409004 | STAT1      | 1 |
| GO:00072: I-kappaB phos 1/272   | 18/18670  | 0.232248 | 0.47414  | 0.409004 | TLR2       | 1 |
| GO:00080: retrograde ax: 1/272  | 18/18670  | 0.232248 | 0.47414  | 0.409004 | KIF1B      | 1 |
| GO:00107: negative regul 1/272  | 18/18670  | 0.232248 | 0.47414  | 0.409004 | RAP1A      | 1 |
| GO:00107: negative regul 1/272  | 18/18670  | 0.232248 | 0.47414  | 0.409004 | HECW2      | 1 |
| GO:00108: negative regul 1/272  | 18/18670  | 0.232248 | 0.47414  | 0.409004 | HDAC4      | 1 |
| GO:00190: modulation by 1/272   | 18/18670  | 0.232248 | 0.47414  | 0.409004 | EIF2AK4    | 1 |
| GO:00217: striatum deve 1/272   | 18/18670  | 0.232248 | 0.47414  | 0.409004 | LRRK2      | 1 |
| GO:00319: regulation of ϕ 1/272 | 18/18670  | 0.232248 | 0.47414  | 0.409004 | IRS2       | 1 |
| GO:00341: activation of ρ 1/272 | 18/18670  | 0.232248 | 0.47414  | 0.409004 | PRKAR2A    | 1 |
| GO:00345: piRNA metabo 1/272    | 18/18670  | 0.232248 | 0.47414  | 0.409004 | TDRD1      | 1 |
| GO:00359: response to m 1/272   | 18/18670  | 0.232248 | 0.47414  | 0.409004 | NFKBIA     | 1 |
| GO:00427: DNA damage i 1/272    | 18/18670  | 0.232248 | 0.47414  | 0.409004 | RPL26      | 1 |
| GO:00450: transcytosis 1/272    | 18/18670  | 0.232248 | 0.47414  | 0.409004 | PICALM     | 1 |
| GO:00482: clathrin coat a 1/272 | 18/18670  | 0.232248 | 0.47414  | 0.409004 | PICALM     | 1 |
| GO:00518: negative regul 1/272  | 18/18670  | 0.232248 | 0.47414  | 0.409004 | THBS1      | 1 |
| GO:00601: negative regul 1/272  | 18/18670  | 0.232248 | 0.47414  | 0.409004 | RGS2       | 1 |
| GO:00605: negative regul 1/272  | 18/18670  | 0.232248 | 0.47414  | 0.409004 | FADD       | 1 |
| GO:00607: mammary glai 1/272    | 18/18670  | 0.232248 | 0.47414  | 0.409004 | HIF1A      | 1 |
| GO:00613: mammary glai 1/272    | 18/18670  | 0.232248 | 0.47414  | 0.409004 | HIF1A      | 1 |
| GO:00620: negative regul 1/272  | 18/18670  | 0.232248 | 0.47414  | 0.409004 | FADD       | 1 |
| GO:00708: positive regul: 1/272 | 18/18670  | 0.232248 | 0.47414  | 0.409004 | IRS2       | 1 |
| GO:00713: cellular respor 1/272 | 18/18670  | 0.232248 | 0.47414  | 0.409004 | PTGS2      | 1 |
| GO:00716: monocyte che 1/272    | 18/18670  | 0.232248 | 0.47414  | 0.409004 | CLEC7A     | 1 |
| GO:00716: regulation of r 1/272 | 18/18670  | 0.232248 | 0.47414  | 0.409004 | CLEC7A     | 1 |
| GO:00720: renal vesicle n 1/272 | 18/18670  | 0.232248 | 0.47414  | 0.409004 | STAT1      | 1 |
| GO:00725: hepatocyte pr 1/272   | 18/18670  | 0.232248 | 0.47414  | 0.409004 | SULF2      | 1 |

|                            |       |           |          |          |          |            |   |
|----------------------------|-------|-----------|----------|----------|----------|------------|---|
| GO:00725: epithelial cell  | 1/272 | 18/18670  | 0.232248 | 0.47414  | 0.409004 | SULF2      | 1 |
| GO:00903: regulation of    | 1/272 | 18/18670  | 0.232248 | 0.47414  | 0.409004 | ABAT       | 1 |
| GO:01501: negative regul   | 1/272 | 18/18670  | 0.232248 | 0.47414  | 0.409004 | THBS1      | 1 |
| GO:19002: regulation of    | 1/272 | 18/18670  | 0.232248 | 0.47414  | 0.409004 | IFNGR1     | 1 |
| GO:19005: negative regul   | 1/272 | 18/18670  | 0.232248 | 0.47414  | 0.409004 | HDAC4      | 1 |
| GO:19021: regulation of i  | 1/272 | 18/18670  | 0.232248 | 0.47414  | 0.409004 | RPL26      | 1 |
| GO:20004: regulation of c  | 1/272 | 18/18670  | 0.232248 | 0.47414  | 0.409004 | PRKAR2A    | 1 |
| GO:00303: positive regul   | 4/272 | 169/18670 | 0.232978 | 0.474219 | 0.409072 | RPS6KA3/1  | 4 |
| GO:00380: Fc-epsilon rec   | 4/272 | 169/18670 | 0.232978 | 0.474219 | 0.409072 | PAK2/PSM   | 4 |
| GO:01400: organelle loca   | 4/272 | 169/18670 | 0.232978 | 0.474219 | 0.409072 | CEP152/ST  | 4 |
| GO:00016: ameoboidal-tyr   | 9/272 | 462/18670 | 0.233346 | 0.474219 | 0.409072 | PTGS2/THI  | 9 |
| GO:00026: regulation of i  | 2/272 | 63/18670  | 0.233376 | 0.474219 | 0.409072 | IL4R/EXOS  | 2 |
| GO:00068: Golgi to plasm   | 2/272 | 63/18670  | 0.233376 | 0.474219 | 0.409072 | GOLPH3/E   | 2 |
| GO:00422: ribosome asse    | 2/272 | 63/18670  | 0.233376 | 0.474219 | 0.409072 | RPS28/RPS  | 2 |
| GO:00422: purine nucleo:   | 2/272 | 63/18670  | 0.233376 | 0.474219 | 0.409072 | NT5C2/LRF  | 2 |
| GO:00429: amyloid precu    | 2/272 | 63/18670  | 0.233376 | 0.474219 | 0.409072 | IFNGR1/PI  | 2 |
| GO:00466: regulation of    | 2/272 | 63/18670  | 0.233376 | 0.474219 | 0.409072 | IL4R/IL18  | 2 |
| GO:00466: response to c    | 2/272 | 63/18670  | 0.233376 | 0.474219 | 0.409072 | B2M/MMF    | 2 |
| GO:00329: collagen meta    | 3/272 | 115/18670 | 0.235389 | 0.47725  | 0.411687 | HIF1A/RAF  | 3 |
| GO:00457: positive regul   | 8/272 | 403/18670 | 0.235671 | 0.477328 | 0.411754 | PAK2/SIRP  | 8 |
| GO:00070: spindle organi   | 4/272 | 170/18670 | 0.236102 | 0.477328 | 0.411754 | TACC3/GO   | 4 |
| GO:00434: negative regul   | 4/272 | 170/18670 | 0.236102 | 0.477328 | 0.411754 | EIF2AK4/EI | 4 |
| GO:00717: response to B    | 4/272 | 170/18670 | 0.236102 | 0.477328 | 0.411754 | USP15/TOI  | 4 |
| GO:00717: cellular respor  | 4/272 | 170/18670 | 0.236102 | 0.477328 | 0.411754 | USP15/TOI  | 4 |
| GO:00516: protein matur    | 6/272 | 285/18670 | 0.236974 | 0.478818 | 0.413039 | PLAU/MM    | 6 |
| GO:00601: maternal proc    | 2/272 | 64/18670  | 0.239152 | 0.481989 | 0.415774 | PTGS2/RG   | 2 |
| GO:20003: negative regul   | 2/272 | 64/18670  | 0.239152 | 0.481989 | 0.415774 | HK2/HIF1A  | 2 |
| GO:00009: cytokinesis      | 4/272 | 171/18670 | 0.239236 | 0.481989 | 0.415774 | UNC119/B   | 4 |
| GO:00066: phosphatidyli    | 3/272 | 116/18670 | 0.239258 | 0.481989 | 0.415774 | SYNJ2/MPI  | 3 |
| GO:00217: glial cell devel | 3/272 | 116/18670 | 0.239258 | 0.481989 | 0.415774 | IFNGR1/S1  | 3 |
| GO:00159: energy derivat   | 6/272 | 286/18670 | 0.23936  | 0.481989 | 0.415774 | DLD/PYGL   | 6 |
| GO:00226: ribonucleopro    | 5/272 | 229/18670 | 0.242365 | 0.482257 | 0.416006 | RPS28/RPS  | 5 |
| GO:00512: protein tetran   | 4/272 | 172/18670 | 0.24238  | 0.482257 | 0.416006 | UPB1/B2M   | 4 |
| GO:00076: memory           | 3/272 | 117/18670 | 0.243138 | 0.482257 | 0.416006 | PTGS2/NQ   | 3 |
| GO:00020: osteoblast dev   | 1/272 | 19/18670  | 0.243445 | 0.482257 | 0.416006 | HDAC4      | 1 |
| GO:00072: G protein-cou    | 1/272 | 19/18670  | 0.243445 | 0.482257 | 0.416006 | CDK5R1     | 1 |
| GO:00105: negative regul   | 1/272 | 19/18670  | 0.243445 | 0.482257 | 0.416006 | ABAT       | 1 |
| GO:00160: rRNA cataboli    | 1/272 | 19/18670  | 0.243445 | 0.482257 | 0.416006 | EXOSC3     | 1 |
| GO:00309: positive regul   | 1/272 | 19/18670  | 0.243445 | 0.482257 | 0.416006 | HIF1A      | 1 |
| GO:00320: ARF protein si   | 1/272 | 19/18670  | 0.243445 | 0.482257 | 0.416006 | MAP4K4     | 1 |
| GO:00320: regulation of    | 1/272 | 19/18670  | 0.243445 | 0.482257 | 0.416006 | MAP4K4     | 1 |
| GO:00320: response to m    | 1/272 | 19/18670  | 0.243445 | 0.482257 | 0.416006 | THBS1      | 1 |
| GO:00322: myelin assembl   | 1/272 | 19/18670  | 0.243445 | 0.482257 | 0.416006 | TLR2       | 1 |
| GO:00327: negative regul   | 1/272 | 19/18670  | 0.243445 | 0.482257 | 0.416006 | IFIT1      | 1 |
| GO:00343: diol biosynthe   | 1/272 | 19/18670  | 0.243445 | 0.482257 | 0.416006 | ASAH1      | 1 |
| GO:00427: mRNA transcr     | 1/272 | 19/18670  | 0.243445 | 0.482257 | 0.416006 | HIF1A      | 1 |
| GO:00450: T-helper 1 cell  | 1/272 | 19/18670  | 0.243445 | 0.482257 | 0.416006 | IL4R       | 1 |
| GO:00450: regulation of i  | 1/272 | 19/18670  | 0.243445 | 0.482257 | 0.416006 | CLEC7A     | 1 |

|                                 |           |          |          |          |           |   |
|---------------------------------|-----------|----------|----------|----------|-----------|---|
| GO:00454: regulation of i 1/272 | 19/18670  | 0.243445 | 0.482257 | 0.416006 | CLEC7A    | 1 |
| GO:00459: negative regul 1/272  | 19/18670  | 0.243445 | 0.482257 | 0.416006 | EIF2AK4   | 1 |
| GO:00459: negative regul 1/272  | 19/18670  | 0.243445 | 0.482257 | 0.416006 | HDAC4     | 1 |
| GO:00465: negative regul 1/272  | 19/18670  | 0.243445 | 0.482257 | 0.416006 | TRIM25    | 1 |
| GO:00466: positive regul: 1/272 | 19/18670  | 0.243445 | 0.482257 | 0.416006 | IL18      | 1 |
| GO:00602: mesenchymal 1/272     | 19/18670  | 0.243445 | 0.482257 | 0.416006 | STAT1     | 1 |
| GO:00720: kidney mesen: 1/272   | 19/18670  | 0.243445 | 0.482257 | 0.416006 | STAT1     | 1 |
| GO:00720: renal vesicle d 1/272 | 19/18670  | 0.243445 | 0.482257 | 0.416006 | STAT1     | 1 |
| GO:00725: liver morphog 1/272   | 19/18670  | 0.243445 | 0.482257 | 0.416006 | SULF2     | 1 |
| GO:19021: negative regul 1/272  | 19/18670  | 0.243445 | 0.482257 | 0.416006 | HIF1A     | 1 |
| GO:19046: regulation of r 1/272 | 19/18670  | 0.243445 | 0.482257 | 0.416006 | PICALM    | 1 |
| GO:20008: regulation of s 1/272 | 19/18670  | 0.243445 | 0.482257 | 0.416006 | NKX3-1    | 1 |
| GO:00226: ribonucleopro 9/272   | 468/18670 | 0.244478 | 0.482554 | 0.416262 | RPS28/RPS | 9 |
| GO:00003: regulation of e 2/272 | 65/18670  | 0.244549 | 0.482554 | 0.416262 | RBM7/RBM  | 2 |
| GO:00070: endoplasmic r 2/272   | 65/18670  | 0.244549 | 0.482554 | 0.416262 | RAB3GAP1  | 2 |
| GO:00091: nucleotide cat 2/272  | 65/18670  | 0.244549 | 0.482554 | 0.416262 | PDE7A/NT  | 2 |
| GO:00343: adherens junc 2/272   | 65/18670  | 0.244549 | 0.482554 | 0.416262 | CDH2/MAI  | 2 |
| GO:00511: negative regul 2/272  | 65/18670  | 0.244549 | 0.482554 | 0.416262 | RGS2/HDA  | 2 |
| GO:00603: pathway-restr 2/272   | 65/18670  | 0.244549 | 0.482554 | 0.416262 | USP15/PBI | 2 |
| GO:19040: positive regul: 5/272 | 230/18670 | 0.245072 | 0.483317 | 0.41692  | PTGS2/THI | 5 |
| GO:00550: striated muscl 4/272  | 173/18670 | 0.245533 | 0.483671 | 0.417225 | BIN3/RGS2 | 4 |
| GO:00508: synapse organ 8/272   | 408/18670 | 0.245661 | 0.483671 | 0.417225 | NTNG2/PF  | 8 |
| GO:00605: muscle tissue 8/272   | 408/18670 | 0.245661 | 0.483671 | 0.417225 | IFRD1/SAP | 8 |
| GO:00511: cofactor biosy 5/272  | 231/18670 | 0.247787 | 0.487314 | 0.420368 | DLD/PTGS: | 5 |
| GO:19033: regulation of r 5/272 | 231/18670 | 0.247787 | 0.487314 | 0.420368 | GOLGA2/R  | 5 |
| GO:00158: acidic amino a 2/272  | 66/18670  | 0.249951 | 0.487738 | 0.420734 | RAB3GAP1  | 2 |
| GO:00454: regulation of r 2/272 | 66/18670  | 0.249951 | 0.487738 | 0.420734 | PTGS2/CLE | 2 |
| GO:00706: regulation of r 2/272 | 66/18670  | 0.249951 | 0.487738 | 0.420734 | THBS1/LRF | 2 |
| GO:19018: negative regul 2/272  | 66/18670  | 0.249951 | 0.487738 | 0.420734 | LMOD3/AI  | 2 |
| GO:00621: cellular respor 7/272 | 350/18670 | 0.250146 | 0.487738 | 0.420734 | TXN/PTGS: | 7 |
| GO:00323: DNA geometri 3/272    | 119/18670 | 0.250928 | 0.487738 | 0.420734 | CHD7/MCI  | 3 |
| GO:01200: regulation of r 4/272 | 175/18670 | 0.251867 | 0.487738 | 0.420734 | F2RL1/PFN | 4 |
| GO:00030: muscle system 9/272   | 472/18670 | 0.252001 | 0.487738 | 0.420734 | SULF2/PTC | 9 |
| GO:00902: regulation of c 6/272 | 292/18670 | 0.253826 | 0.487738 | 0.420734 | SULF2/TOE | 6 |
| GO:00025: regulation of e 1/272 | 20/18670  | 0.254478 | 0.487738 | 0.420734 | THBS1     | 1 |
| GO:00028: positive regul: 1/272 | 20/18670  | 0.254478 | 0.487738 | 0.420734 | IL18      | 1 |
| GO:00032: cardiac right v 1/272 | 20/18670  | 0.254478 | 0.487738 | 0.420734 | CHD7      | 1 |
| GO:00065: arginine meta 1/272   | 20/18670  | 0.254478 | 0.487738 | 0.420734 | PADI4     | 1 |
| GO:00076: copulation 1/272      | 20/18670  | 0.254478 | 0.487738 | 0.420734 | ABAT      | 1 |
| GO:00083: asymmetric ce 1/272   | 20/18670  | 0.254478 | 0.487738 | 0.420734 | GOLGA2    | 1 |
| GO:00100: cardioblast dif 1/272 | 20/18670  | 0.254478 | 0.487738 | 0.420734 | EOMES     | 1 |
| GO:00105: positive regul: 1/272 | 20/18670  | 0.254478 | 0.487738 | 0.420734 | GOLGA2    | 1 |
| GO:00105: positive regul: 1/272 | 20/18670  | 0.254478 | 0.487738 | 0.420734 | HDAC4     | 1 |
| GO:00107: regulation of r 1/272 | 20/18670  | 0.254478 | 0.487738 | 0.420734 | LRRK2     | 1 |
| GO:00193: leukotriene bi 1/272  | 20/18670  | 0.254478 | 0.487738 | 0.420734 | ALOX5AP   | 1 |
| GO:00324: response to m 1/272   | 20/18670  | 0.254478 | 0.487738 | 0.420734 | NFKBIA    | 1 |
| GO:00328: positive regul: 1/272 | 20/18670  | 0.254478 | 0.487738 | 0.420734 | IL18      | 1 |
| GO:00330: positive regul: 1/272 | 20/18670  | 0.254478 | 0.487738 | 0.420734 | IL4R      | 1 |

|                                  |           |          |          |          |           |   |
|----------------------------------|-----------|----------|----------|----------|-----------|---|
| GO:003414: regulation of t1/272  | 20/18670  | 0.254478 | 0.487738 | 0.420734 | F2RL1     | 1 |
| GO:004205: regulation of c1/272  | 20/18670  | 0.254478 | 0.487738 | 0.420734 | ABAT      | 1 |
| GO:004206: regulation of c1/272  | 20/18670  | 0.254478 | 0.487738 | 0.420734 | ABAT      | 1 |
| GO:004222: interleukin-8 t1/272  | 20/18670  | 0.254478 | 0.487738 | 0.420734 | CLEC7A    | 1 |
| GO:004304: DNA methylat1/272     | 20/18670  | 0.254478 | 0.487738 | 0.420734 | TDRD1     | 1 |
| GO:004333: negative regul1/272   | 20/18670  | 0.254478 | 0.487738 | 0.420734 | IL4R      | 1 |
| GO:004655: ceramide cata1/272    | 20/18670  | 0.254478 | 0.487738 | 0.420734 | ASAH1     | 1 |
| GO:004682: negative regul1/272   | 20/18670  | 0.254478 | 0.487738 | 0.420734 | TXN       | 1 |
| GO:004867: regulation of c1/272  | 20/18670  | 0.254478 | 0.487738 | 0.420734 | IFRD1     | 1 |
| GO:005103: barbed-end ac1/272    | 20/18670  | 0.254478 | 0.487738 | 0.420734 | ADD3      | 1 |
| GO:005158: regulation of r1/272  | 20/18670  | 0.254478 | 0.487738 | 0.420734 | RGS2      | 1 |
| GO:006000: Sertoli cell dif1/272 | 20/18670  | 0.254478 | 0.487738 | 0.420734 | ARID4A    | 1 |
| GO:007093: histone H3 de1/272    | 20/18670  | 0.254478 | 0.487738 | 0.420734 | HDAC4     | 1 |
| GO:007222: metanephric r1/272    | 20/18670  | 0.254478 | 0.487738 | 0.420734 | STAT1     | 1 |
| GO:009770: connective tis1/272   | 20/18670  | 0.254478 | 0.487738 | 0.420734 | HIF1A     | 1 |
| GO:009865: postsynaptic s1/272   | 20/18670  | 0.254478 | 0.487738 | 0.420734 | NTNG2     | 1 |
| GO:009878: response to m1/272    | 20/18670  | 0.254478 | 0.487738 | 0.420734 | HK2       | 1 |
| GO:190042: regulation of c1/272  | 20/18670  | 0.254478 | 0.487738 | 0.420734 | F2RL1     | 1 |
| GO:190188: positive regul:1/272  | 20/18670  | 0.254478 | 0.487738 | 0.420734 | F2RL1     | 1 |
| GO:190222: negative regul1/272   | 20/18670  | 0.254478 | 0.487738 | 0.420734 | LRRK2     | 1 |
| GO:190320: negative regul1/272   | 20/18670  | 0.254478 | 0.487738 | 0.420734 | HIF1A     | 1 |
| GO:190397: regulation of r1/272  | 20/18670  | 0.254478 | 0.487738 | 0.420734 | LRRK2     | 1 |
| GO:190552: positive regul:1/272  | 20/18670  | 0.254478 | 0.487738 | 0.420734 | THBS1     | 1 |
| GO:200073: positive regul:1/272  | 20/18670  | 0.254478 | 0.487738 | 0.420734 | B2M       | 1 |
| GO:000303: renal system f3/272   | 120/18670 | 0.254837 | 0.487837 | 0.420819 | SULF2/F2R | 3 |
| GO:007208: stem cell proli3/272  | 120/18670 | 0.254837 | 0.487837 | 0.420819 | EIF2AK2/H | 3 |
| GO:000940: response to h4/272    | 176/18670 | 0.255047 | 0.487837 | 0.420819 | PTGS2/THI | 4 |
| GO:001580: L-amino acid t2/272   | 67/18670  | 0.255356 | 0.487837 | 0.420819 | RGS2/SLC3 | 2 |
| GO:004630: monosacchari2/272     | 67/18670  | 0.255356 | 0.487837 | 0.420819 | PFKFB2/HK | 2 |
| GO:005120: centrosome d2/272     | 67/18670  | 0.255356 | 0.487837 | 0.420819 | CEP152/CE | 2 |
| GO:004858: development:5/272     | 234/18670 | 0.255979 | 0.488762 | 0.421617 | IFRD1/TNF | 5 |
| GO:006049: regulation of c4/272  | 177/18670 | 0.258235 | 0.492804 | 0.425104 | F2RL1/PFN | 4 |
| GO:006050: development:5/272     | 235/18670 | 0.258724 | 0.493264 | 0.425501 | IFRD1/TNF | 5 |
| GO:004867: axon extensio3/272    | 121/18670 | 0.258755 | 0.493264 | 0.425501 | IFRD1/TNF | 3 |
| GO:003158: cell-substrate7/272   | 354/18670 | 0.258982 | 0.493431 | 0.425645 | PLAU/MEC  | 7 |
| GO:001080: negative regul2/272   | 68/18670  | 0.260764 | 0.495228 | 0.427195 | THBS1/MA  | 2 |
| GO:001623: positive regul:2/272  | 68/18670  | 0.260764 | 0.495228 | 0.427195 | RAB3GAP1  | 2 |
| GO:001990: lipid storage2/272    | 68/18670  | 0.260764 | 0.495228 | 0.427195 | NFKBIA/OS | 2 |
| GO:003304: regulation of r2/272  | 68/18670  | 0.260764 | 0.495228 | 0.427195 | TACC3/HE  | 2 |
| GO:003590: skeletal muscl2/272   | 68/18670  | 0.260764 | 0.495228 | 0.427195 | SAP30/EOI | 2 |
| GO:190333: regulation of f2/272  | 68/18670  | 0.260764 | 0.495228 | 0.427195 | THBS1/LRF | 2 |
| GO:004630: carboxylic acic7/272  | 355/18670 | 0.261205 | 0.495517 | 0.427444 | ABCC5/PT  | 7 |
| GO:002240: membrane do4/272      | 178/18670 | 0.261431 | 0.495517 | 0.427444 | CEP152/ST | 4 |
| GO:005080: protein stabili4/272  | 178/18670 | 0.261431 | 0.495517 | 0.427444 | PFN2/MDM  | 4 |
| GO:007180: ribonucleopro5/272    | 236/18670 | 0.261476 | 0.495517 | 0.427444 | RPS28/RPS | 5 |
| GO:000150: regulation of c8/272  | 416/18670 | 0.261929 | 0.495957 | 0.427824 | RPS6KA3/I | 8 |
| GO:190340: reactive oxyge3/272   | 122/18670 | 0.26268  | 0.495957 | 0.427824 | PTGS2/CLE | 3 |
| GO:000690: humoral immu7/272     | 356/18670 | 0.263434 | 0.495957 | 0.427824 | PPP2R3C/C | 7 |

|                                                        |           |          |          |          |              |   |
|--------------------------------------------------------|-----------|----------|----------|----------|--------------|---|
| GO:001606: organic acid biosynthesis                   | 356/18670 | 0.263434 | 0.495957 | 0.427824 | ABCC5/PTGS2  | 7 |
| GO:007231: monocarboxylate transport                   | 237/18670 | 0.264236 | 0.495957 | 0.427824 | PTGS2/HS1A   | 5 |
| GO:000192: positive regulation of cell growth          | 21/18670  | 0.265351 | 0.495957 | 0.427824 | RAB3GAP1     | 1 |
| GO:000321: atrial septum development                   | 21/18670  | 0.265351 | 0.495957 | 0.427824 | MDM4         | 1 |
| GO:000611: mitochondrial electron transport            | 21/18670  | 0.265351 | 0.495957 | 0.427824 | COX7B        | 1 |
| GO:000644: regulation of transcription                 | 21/18670  | 0.265351 | 0.495957 | 0.427824 | YRDC         | 1 |
| GO:001964: aerobic electron transport                  | 21/18670  | 0.265351 | 0.495957 | 0.427824 | COX7B        | 1 |
| GO:003021: maintenance of cell growth                  | 21/18670  | 0.265351 | 0.495957 | 0.427824 | PBLD         | 1 |
| GO:003251: positive regulation of cell growth          | 21/18670  | 0.265351 | 0.495957 | 0.427824 | PPP1R12A     | 1 |
| GO:003261: regulation of cell growth                   | 21/18670  | 0.265351 | 0.495957 | 0.427824 | IL17RA       | 1 |
| GO:003268: negative regulation of cell growth          | 21/18670  | 0.265351 | 0.495957 | 0.427824 | F2RL1        | 1 |
| GO:003298: protein-DNA complex formation               | 21/18670  | 0.265351 | 0.495957 | 0.427824 | RPL23        | 1 |
| GO:003438: lipid droplet formation                     | 21/18670  | 0.265351 | 0.495957 | 0.427824 | RAB3GAP1     | 1 |
| GO:003511: embryonic hemopoiesis                       | 21/18670  | 0.265351 | 0.495957 | 0.427824 | HIF1A        | 1 |
| GO:003541: response to inflammation                    | 21/18670  | 0.265351 | 0.495957 | 0.427824 | EIF2AK2      | 1 |
| GO:003574: CD4-positive, T-helper cell differentiation | 21/18670  | 0.265351 | 0.495957 | 0.427824 | IL18         | 1 |
| GO:004211: neurotransmitter release                    | 21/18670  | 0.265351 | 0.495957 | 0.427824 | ABAT         | 1 |
| GO:004501: plasma membrane organization                | 21/18670  | 0.265351 | 0.495957 | 0.427824 | FOLR3        | 1 |
| GO:004671: muscle cell cell cycle                      | 21/18670  | 0.265351 | 0.495957 | 0.427824 | HIF1A        | 1 |
| GO:004871: calcium ion reuptake                        | 21/18670  | 0.265351 | 0.495957 | 0.427824 | RAB3GAP1     | 1 |
| GO:007141: cellular respiration                        | 21/18670  | 0.265351 | 0.495957 | 0.427824 | PTGS2        | 1 |
| GO:007211: cell proliferation                          | 21/18670  | 0.265351 | 0.495957 | 0.427824 | STAT1        | 1 |
| GO:200021: regulation of transcription                 | 21/18670  | 0.265351 | 0.495957 | 0.427824 | CHD8         | 1 |
| GO:004221: ribosome biogenesis                         | 297/18670 | 0.266062 | 0.496445 | 0.428245 | RPS28/RPS27A | 6 |
| GO:000801: axo-dendritic transmission                  | 69/18670  | 0.266173 | 0.496445 | 0.428245 | KIF1B/HIF1A  | 2 |
| GO:003641: synaptic vesicle transport                  | 69/18670  | 0.266173 | 0.496445 | 0.428245 | LRRK2/PIC1   | 2 |
| GO:005071: negative regulation of cell growth          | 69/18670  | 0.266173 | 0.496445 | 0.428245 | IFRD1/CDK2   | 2 |
| GO:005101: negative regulation of transcription        | 238/18670 | 0.267002 | 0.497728 | 0.429352 | F2RL1/SRC1   | 5 |
| GO:007141: cellular respiration                        | 180/18670 | 0.267846 | 0.498629 | 0.430128 | ACSL1/NQA1   | 4 |
| GO:190531: regulation of transcription                 | 180/18670 | 0.267846 | 0.498629 | 0.430128 | STAT1/PSM1   | 4 |
| GO:004581: positive regulation of cell growth          | 358/18670 | 0.267907 | 0.498629 | 0.430128 | NKX3-1/CLIP1 | 7 |
| GO:004481: cell cycle G1/S transition                  | 298/18670 | 0.268527 | 0.49952  | 0.430897 | ARID3A/GATA1 | 6 |
| GO:000171: establishment of cell growth                | 124/18670 | 0.270554 | 0.501166 | 0.432317 | PSMD12/PAB1  | 3 |
| GO:000711: establishment of cell growth                | 124/18670 | 0.270554 | 0.501166 | 0.432317 | PSMD12/PAB1  | 3 |
| GO:004801: phosphatidylinositol signaling              | 181/18670 | 0.271064 | 0.501166 | 0.432317 | NKX3-1/F2RL1 | 4 |
| GO:003301: T cell differentiation                      | 70/18670  | 0.271582 | 0.501166 | 0.432317 | B2M/FADL1    | 2 |
| GO:006031: SMAD protein signaling                      | 70/18670  | 0.271582 | 0.501166 | 0.432317 | TOB1/PBL1    | 2 |
| GO:000821: regulation of transcription                 | 182/18670 | 0.27429  | 0.501166 | 0.432317 | F2RL1/PTC1   | 4 |
| GO:003191: TOR signaling                               | 125/18670 | 0.274501 | 0.501166 | 0.432317 | GOLPH3/RAB11 | 3 |
| GO:004541: response to ethanol                         | 125/18670 | 0.274501 | 0.501166 | 0.432317 | RGS2/S100B   | 3 |
| GO:001071: regulation of cell growth                   | 301/18670 | 0.275957 | 0.501166 | 0.432317 | IFRD1/TNF    | 6 |
| GO:000041: maturation of cell growth                   | 22/18670  | 0.276066 | 0.501166 | 0.432317 | EXOSC3       | 1 |
| GO:000041: cleavage involvement                        | 22/18670  | 0.276066 | 0.501166 | 0.432317 | EXOSC3       | 1 |
| GO:000201: positive regulation of cell growth          | 22/18670  | 0.276066 | 0.501166 | 0.432317 | HIF1A        | 1 |
| GO:000601: acetyl-CoA biosynthesis                     | 22/18670  | 0.276066 | 0.501166 | 0.432317 | DLD          | 1 |
| GO:000721: spermatid nuclear envelope formation        | 22/18670  | 0.276066 | 0.501166 | 0.432317 | SRPK1        | 1 |
| GO:000761: mating behavior                             | 22/18670  | 0.276066 | 0.501166 | 0.432317 | HDAC4        | 1 |
| GO:000921: cobalamin metabolism                        | 22/18670  | 0.276066 | 0.501166 | 0.432317 | LMBRD1       | 1 |



|                                  |           |          |          |          |           |   |
|----------------------------------|-----------|----------|----------|----------|-----------|---|
| GO:00102: response to lit 1/272  | 22/18670  | 0.276066 | 0.501166 | 0.432317 | PTGS2     | 1 |
| GO:00108: regulation of r 1/272  | 22/18670  | 0.276066 | 0.501166 | 0.432317 | HIF1A     | 1 |
| GO:00218: cerebral corte 1/272   | 22/18670  | 0.276066 | 0.501166 | 0.432317 | CDK5R1    | 1 |
| GO:00218: hypothalamus 1/272     | 22/18670  | 0.276066 | 0.501166 | 0.432317 | RAB3GAP1  | 1 |
| GO:00220: central nervou 1/272   | 22/18670  | 0.276066 | 0.501166 | 0.432317 | TLR2      | 1 |
| GO:00220: telencephalon 1/272    | 22/18670  | 0.276066 | 0.501166 | 0.432317 | CDK5R1    | 1 |
| GO:00322: axon ensheat 1/272     | 22/18670  | 0.276066 | 0.501166 | 0.432317 | TLR2      | 1 |
| GO:00326: interleukin-5 r 1/272  | 22/18670  | 0.276066 | 0.501166 | 0.432317 | IL17RA    | 1 |
| GO:00326: regulation of i 1/272  | 22/18670  | 0.276066 | 0.501166 | 0.432317 | IL17RA    | 1 |
| GO:00327: positive regul: 1/272  | 22/18670  | 0.276066 | 0.501166 | 0.432317 | STAT1     | 1 |
| GO:00332: regulation of r 1/272  | 22/18670  | 0.276066 | 0.501166 | 0.432317 | HDAC4     | 1 |
| GO:00343: diol metabolic 1/272   | 22/18670  | 0.276066 | 0.501166 | 0.432317 | ASAH1     | 1 |
| GO:00359: steroid hormc 1/272    | 22/18670  | 0.276066 | 0.501166 | 0.432317 | NKX3-1    | 1 |
| GO:00456: regulation of r 1/272  | 22/18670  | 0.276066 | 0.501166 | 0.432317 | FADD      | 1 |
| GO:00457: positive regul: 1/272  | 22/18670  | 0.276066 | 0.501166 | 0.432317 | PTGS2     | 1 |
| GO:00460: cAMP metabo 1/272      | 22/18670  | 0.276066 | 0.501166 | 0.432317 | PDE7A     | 1 |
| GO:00466: positive regul: 1/272  | 22/18670  | 0.276066 | 0.501166 | 0.432317 | OSBPL8    | 1 |
| GO:00483: immunoglobu 1/272      | 22/18670  | 0.276066 | 0.501166 | 0.432317 | TNFSF13B  | 1 |
| GO:00507: negative regul 1/272   | 22/18670  | 0.276066 | 0.501166 | 0.432317 | TLR2      | 1 |
| GO:00510: positive regul: 1/272  | 22/18670  | 0.276066 | 0.501166 | 0.432317 | HIF1A     | 1 |
| GO:00514: maintenance c 1/272    | 22/18670  | 0.276066 | 0.501166 | 0.432317 | TXN       | 1 |
| GO:00605: negative regul 1/272   | 22/18670  | 0.276066 | 0.501166 | 0.432317 | FADD      | 1 |
| GO:00605: intestinal epit 1/272  | 22/18670  | 0.276066 | 0.501166 | 0.432317 | HIF1A     | 1 |
| GO:00713: cellular respor 1/272  | 22/18670  | 0.276066 | 0.501166 | 0.432317 | IFIT1     | 1 |
| GO:00726: interferon-gar 1/272   | 22/18670  | 0.276066 | 0.501166 | 0.432317 | F2RL1     | 1 |
| GO:00973: plasma memb 1/272      | 22/18670  | 0.276066 | 0.501166 | 0.432317 | BIN3      | 1 |
| GO:00996: protein localiz 1/272  | 22/18670  | 0.276066 | 0.501166 | 0.432317 | RAP1A     | 1 |
| GO:00996: neurotransmit 1/272    | 22/18670  | 0.276066 | 0.501166 | 0.432317 | RAP1A     | 1 |
| GO:19015: positive regul: 1/272  | 22/18670  | 0.276066 | 0.501166 | 0.432317 | HIF1A     | 1 |
| GO:19030: negative regul 1/272   | 22/18670  | 0.276066 | 0.501166 | 0.432317 | PICALM    | 1 |
| GO:20010: regulation of c 1/272  | 22/18670  | 0.276066 | 0.501166 | 0.432317 | DTX3L     | 1 |
| GO:00336: cellular polysa 2/272  | 71/18670  | 0.276989 | 0.501556 | 0.432653 | IRS2/PPP1 | 2 |
| GO:00427: snRNA transcr 2/272    | 71/18670  | 0.276989 | 0.501556 | 0.432653 | POLR2J/PC | 2 |
| GO:00507: regulation of t 2/272  | 71/18670  | 0.276989 | 0.501556 | 0.432653 | EIF2AK4/H | 2 |
| GO:00714: cellular respor 2/272  | 71/18670  | 0.276989 | 0.501556 | 0.432653 | GADD45A/  | 2 |
| GO:19012: nucleoside ph 2/272    | 71/18670  | 0.276989 | 0.501556 | 0.432653 | PDE7A/NT  | 2 |
| GO:00431: positive regul: 4/272  | 183/1867C | 0.277521 | 0.502005 | 0.433041 | F2RL1/S10 | 4 |
| GO:00507: regulation of e 4/272  | 183/1867C | 0.277521 | 0.502005 | 0.433041 | IFRD1/TNF | 4 |
| GO:00181: (peptidyl-threc 3/272  | 126/1867C | 0.278453 | 0.503435 | 0.434274 | LMTK2/CD  | 3 |
| GO:00488: multicellular c 9/272  | 486/1867C | 0.27891  | 0.504003 | 0.434764 | GADD45G/  | 9 |
| GO:00480: inositol lipid-n 4/272 | 184/1867C | 0.280759 | 0.506826 | 0.4372   | NKX3-1/F2 | 4 |
| GO:00516: establishment 4/272    | 184/1867C | 0.280759 | 0.506826 | 0.4372   | GOLGA2/K  | 4 |
| GO:00002: mitotic cytokii 2/272  | 72/18670  | 0.282394 | 0.508482 | 0.438628 | UNC119/R  | 2 |
| GO:00093: (snRNA transcr 2/272   | 72/18670  | 0.282394 | 0.508482 | 0.438628 | POLR2J/PC | 2 |
| GO:00380: signal transdu 2/272   | 72/18670  | 0.282394 | 0.508482 | 0.438628 | IFI6/FADD | 2 |
| GO:00971: extrinsic apop 2/272   | 72/18670  | 0.282394 | 0.508482 | 0.438628 | IFI6/FADD | 2 |
| GO:19037: regulation of e 2/272  | 72/18670  | 0.282394 | 0.508482 | 0.438628 | UBE2D3/LI | 2 |
| GO:19030: regulation of l 6/272  | 304/1867C | 0.283436 | 0.510098 | 0.440022 | PAK2/SIRP | 6 |

|                             |       |           |          |          |          |            |   |
|-----------------------------|-------|-----------|----------|----------|----------|------------|---|
| GO:001059: positive regulat | 3/272 | 128/18670 | 0.286375 | 0.510646 | 0.440495 | PTGS2/THI  | 3 |
| GO:000635: regulation of t  | 1/272 | 23/18670  | 0.286625 | 0.510646 | 0.440495 | CHD8       | 1 |
| GO:000742: axonal fascicu   | 1/272 | 23/18670  | 0.286625 | 0.510646 | 0.440495 | CDK5R1     | 1 |
| GO:000904: aspartate fam    | 1/272 | 23/18670  | 0.286625 | 0.510646 | 0.440495 | DLD        | 1 |
| GO:001574: C4-dicarboxyl    | 1/272 | 23/18670  | 0.286625 | 0.510646 | 0.440495 | ABAT       | 1 |
| GO:003233: positive regul   | 1/272 | 23/18670  | 0.286625 | 0.510646 | 0.440495 | NFKBIA     | 1 |
| GO:003233: positive regul   | 1/272 | 23/18670  | 0.286625 | 0.510646 | 0.440495 | NFKBIA     | 1 |
| GO:003603: CD8-positive,    | 1/272 | 23/18670  | 0.286625 | 0.510646 | 0.440495 | EOMES      | 1 |
| GO:004613: pyrimidine nu    | 1/272 | 23/18670  | 0.286625 | 0.510646 | 0.440495 | UPB1       | 1 |
| GO:004873: positive regul   | 1/272 | 23/18670  | 0.286625 | 0.510646 | 0.440495 | TLR2       | 1 |
| GO:007142: hematopoietic    | 1/272 | 23/18670  | 0.286625 | 0.510646 | 0.440495 | EIF2AK2    | 1 |
| GO:007213: metanephric t    | 1/272 | 23/18670  | 0.286625 | 0.510646 | 0.440495 | STAT1      | 1 |
| GO:007222: regulation of r  | 1/272 | 23/18670  | 0.286625 | 0.510646 | 0.440495 | STAT1      | 1 |
| GO:007224: metanephric r    | 1/272 | 23/18670  | 0.286625 | 0.510646 | 0.440495 | STAT1      | 1 |
| GO:007233: modified amir    | 1/272 | 23/18670  | 0.286625 | 0.510646 | 0.440495 | FOLR3      | 1 |
| GO:009014: regulation of r  | 1/272 | 23/18670  | 0.286625 | 0.510646 | 0.440495 | LRRK2      | 1 |
| GO:009034: positive regul   | 1/272 | 23/18670  | 0.286625 | 0.510646 | 0.440495 | B2M        | 1 |
| GO:009715: neuronal ster    | 1/272 | 23/18670  | 0.286625 | 0.510646 | 0.440495 | CDH2       | 1 |
| GO:010603: neuron projec    | 1/272 | 23/18670  | 0.286625 | 0.510646 | 0.440495 | CDK5R1     | 1 |
| GO:200072: negative regul   | 1/272 | 23/18670  | 0.286625 | 0.510646 | 0.440495 | RGS2       | 1 |
| GO:002290: electron trans   | 4/272 | 186/18670 | 0.287252 | 0.510991 | 0.440793 | DLD/NQO2   | 4 |
| GO:003030: negative regul   | 4/272 | 186/18670 | 0.287252 | 0.510991 | 0.440793 | IFRD1/SCG  | 4 |
| GO:005500: muscle cell de   | 4/272 | 186/18670 | 0.287252 | 0.510991 | 0.440793 | BIN3/RGS2  | 4 |
| GO:000320: cardiac ventric  | 2/272 | 73/18670  | 0.287796 | 0.511444 | 0.441184 | HIF1A/CHC  | 2 |
| GO:004362: response to e    | 2/272 | 73/18670  | 0.287796 | 0.511444 | 0.441184 | IL4R/TRIM  | 2 |
| GO:004218: cellular keton   | 5/272 | 246/18670 | 0.28935  | 0.513948 | 0.443343 | PTGS2/PSM  | 5 |
| GO:190542: regulation of r  | 4/272 | 187/18670 | 0.290507 | 0.515745 | 0.444893 | CDK5R1/R   | 4 |
| GO:000906: glutamine far    | 2/272 | 74/18670  | 0.293193 | 0.516449 | 0.445501 | HAL/PADI4  | 2 |
| GO:000913: ribonucleosid    | 2/272 | 74/18670  | 0.293193 | 0.516449 | 0.445501 | NT5C2/LRF  | 2 |
| GO:000958: detection of li  | 2/272 | 74/18670  | 0.293193 | 0.516449 | 0.445501 | RGR/UNC1   | 2 |
| GO:003242: lysosome loca    | 2/272 | 74/18670  | 0.293193 | 0.516449 | 0.445501 | IL4R/KIF1B | 2 |
| GO:004330: CD4-positive,    | 2/272 | 74/18670  | 0.293193 | 0.516449 | 0.445501 | IL4R/IL18  | 2 |
| GO:005072: negative regul   | 2/272 | 74/18670  | 0.293193 | 0.516449 | 0.445501 | F2RL1/SRC  | 2 |
| GO:006099: regulation of c  | 2/272 | 74/18670  | 0.293193 | 0.516449 | 0.445501 | CDK5R1/LF  | 2 |
| GO:190018: positive regul   | 2/272 | 74/18670  | 0.293193 | 0.516449 | 0.445501 | PTGS2/DT   | 2 |
| GO:190162: organic hydro    | 2/272 | 74/18670  | 0.293193 | 0.516449 | 0.445501 | CYP4F3/SY  | 2 |
| GO:190303: positive regul   | 2/272 | 74/18670  | 0.293193 | 0.516449 | 0.445501 | THBS1/CLE  | 2 |
| GO:000989: negative regul   | 6/272 | 308/18670 | 0.293477 | 0.516449 | 0.445501 | TOB1/GOL   | 6 |
| GO:000322: cardiac ventric  | 3/272 | 130/18670 | 0.294314 | 0.516449 | 0.445501 | MDM4/HIF   | 3 |
| GO:000699: nucleus organ    | 3/272 | 130/18670 | 0.294314 | 0.516449 | 0.445501 | SRPK2/SUP  | 3 |
| GO:004211: lipoprotein m    | 3/272 | 130/18670 | 0.294314 | 0.516449 | 0.445501 | PPM1B/RA   | 3 |
| GO:190162: glycosyl comp    | 3/272 | 130/18670 | 0.294314 | 0.516449 | 0.445501 | UPB1/NT5   | 3 |
| GO:003233: regulation of i  | 7/272 | 370/18670 | 0.295159 | 0.516449 | 0.445501 | TXN/PTGS:  | 7 |
| GO:000178: B cell apoptot   | 1/272 | 24/18670  | 0.297031 | 0.516449 | 0.445501 | IRS2       | 1 |
| GO:000222: innate immun     | 1/272 | 24/18670  | 0.297031 | 0.516449 | 0.445501 | CAMP       | 1 |
| GO:000280: regulation of i  | 1/272 | 24/18670  | 0.297031 | 0.516449 | 0.445501 | PSMA1      | 1 |
| GO:000318: atrioventricul   | 1/272 | 24/18670  | 0.297031 | 0.516449 | 0.445501 | MDM4       | 1 |
| GO:001028: response to le   | 1/272 | 24/18670  | 0.297031 | 0.516449 | 0.445501 | PTGS2      | 1 |

|                          |       |           |          |          |          |           |   |
|--------------------------|-------|-----------|----------|----------|----------|-----------|---|
| GO:00148 response to m   | 1/272 | 24/18670  | 0.297031 | 0.516449 | 0.445501 | HIF1A     | 1 |
| GO:00215 subpallium de   | 1/272 | 24/18670  | 0.297031 | 0.516449 | 0.445501 | LRRK2     | 1 |
| GO:00218 forebrain regi  | 1/272 | 24/18670  | 0.297031 | 0.516449 | 0.445501 | EOMES     | 1 |
| GO:00218 cerebral corte  | 1/272 | 24/18670  | 0.297031 | 0.516449 | 0.445501 | EOMES     | 1 |
| GO:00443 fibroblast apo  | 1/272 | 24/18670  | 0.297031 | 0.516449 | 0.445501 | CHD8      | 1 |
| GO:00461 polyol catabol  | 1/272 | 24/18670  | 0.297031 | 0.516449 | 0.445501 | SYNJ2     | 1 |
| GO:00466 negative regul  | 1/272 | 24/18670  | 0.297031 | 0.516449 | 0.445501 | IL4R      | 1 |
| GO:00466 decidualizatio  | 1/272 | 24/18670  | 0.297031 | 0.516449 | 0.445501 | PTGS2     | 1 |
| GO:00506 negative regul  | 1/272 | 24/18670  | 0.297031 | 0.516449 | 0.445501 | PPM1B     | 1 |
| GO:00509 positive regul  | 1/272 | 24/18670  | 0.297031 | 0.516449 | 0.445501 | IRS2      | 1 |
| GO:00512 cytoplasmic se  | 1/272 | 24/18670  | 0.297031 | 0.516449 | 0.445501 | NFKBIA    | 1 |
| GO:00620 secondary pal   | 1/272 | 24/18670  | 0.297031 | 0.516449 | 0.445501 | CHD7      | 1 |
| GO:00900 positive regul  | 1/272 | 24/18670  | 0.297031 | 0.516449 | 0.445501 | CAMK1D    | 1 |
| GO:00995 modification c  | 1/272 | 24/18670  | 0.297031 | 0.516449 | 0.445501 | PFN2      | 1 |
| GO:19000 positive regul  | 1/272 | 24/18670  | 0.297031 | 0.516449 | 0.445501 | OSBPL8    | 1 |
| GO:19030 positive regul  | 1/272 | 24/18670  | 0.297031 | 0.516449 | 0.445501 | GOLGA2    | 1 |
| GO:19034 regulation of s | 1/272 | 24/18670  | 0.297031 | 0.516449 | 0.445501 | LRRK2     | 1 |
| GO:19036 regulation of c | 1/272 | 24/18670  | 0.297031 | 0.516449 | 0.445501 | LRRK2     | 1 |
| GO:19043 negative regul  | 1/272 | 24/18670  | 0.297031 | 0.516449 | 0.445501 | PICALM    | 1 |
| GO:20001 negative regul  | 1/272 | 24/18670  | 0.297031 | 0.516449 | 0.445501 | RAPGEF1   | 1 |
| GO:20010 regulation of e | 1/272 | 24/18670  | 0.297031 | 0.516449 | 0.445501 | THBS1     | 1 |
| GO:00456 positive regul  | 7/272 | 371/18670 | 0.297459 | 0.516939 | 0.445923 | RAPGEF1/  | 7 |
| GO:00459 negative regul  | 5/272 | 249/18670 | 0.297819 | 0.51731  | 0.446243 | IFRD1/SCG | 5 |
| GO:00301 B cell differen | 3/272 | 131/18670 | 0.298289 | 0.517371 | 0.446296 | PPP2R3C/  | 3 |
| GO:19028 microtubule c   | 3/272 | 131/18670 | 0.298289 | 0.517371 | 0.446296 | TACC3/GO  | 3 |
| GO:00019 negative regul  | 2/272 | 75/18670  | 0.298585 | 0.517371 | 0.446296 | F2RL1/RFF | 2 |
| GO:00324 Rab protein si  | 2/272 | 75/18670  | 0.298585 | 0.517371 | 0.446296 | RAB24/RA  | 2 |
| GO:00432 negative regul  | 2/272 | 75/18670  | 0.298585 | 0.517371 | 0.446296 | LMOD3/AL  | 2 |
| GO:00423 regulation of r | 8/272 | 434/18670 | 0.299627 | 0.518669 | 0.447416 | PPP2R3C/  | 8 |
| GO:00487 gland develop   | 8/272 | 434/18670 | 0.299627 | 0.518669 | 0.447416 | NKX3-1/SL | 8 |
| GO:00331 regulation of i | 5/272 | 250/18670 | 0.300651 | 0.520188 | 0.448726 | TXN/PTGS  | 5 |
| GO:00031 endothelium c   | 3/272 | 132/18670 | 0.302268 | 0.520474 | 0.448973 | F2RL1/RAF | 3 |
| GO:00464 organophosph    | 3/272 | 132/18670 | 0.302268 | 0.520474 | 0.448973 | PDE7A/NT  | 3 |
| GO:00723 monocarboxyl    | 3/272 | 132/18670 | 0.302268 | 0.520474 | 0.448973 | CYP4F3/IR | 3 |
| GO:00450 glycerolipid bi | 5/272 | 251/18670 | 0.303487 | 0.520474 | 0.448973 | ACP6/ACSI | 5 |
| GO:00003 alternative m   | 2/272 | 76/18670  | 0.30397  | 0.520474 | 0.448973 | RBM7/RBM  | 2 |
| GO:00004 autophagy of    | 2/272 | 76/18670  | 0.30397  | 0.520474 | 0.448973 | HK2/HIF1A | 2 |
| GO:00019 negative regul  | 2/272 | 76/18670  | 0.30397  | 0.520474 | 0.448973 | THBS1/ST  | 2 |
| GO:00068 iron ion trans  | 2/272 | 76/18670  | 0.30397  | 0.520474 | 0.448973 | LMTK2/B2  | 2 |
| GO:00068 drug transmer   | 2/272 | 76/18670  | 0.30397  | 0.520474 | 0.448973 | RGS2/SLC3 | 2 |
| GO:00074 endoderm dev    | 2/272 | 76/18670  | 0.30397  | 0.520474 | 0.448973 | EOMES/M   | 2 |
| GO:00305 regulation of   | 2/272 | 76/18670  | 0.30397  | 0.520474 | 0.448973 | SRGN/HIF1 | 2 |
| GO:00467 microtubule p   | 2/272 | 76/18670  | 0.30397  | 0.520474 | 0.448973 | CDK5R1/G  | 2 |
| GO:00469 regulation of   | 2/272 | 76/18670  | 0.30397  | 0.520474 | 0.448973 | HK2/HEBP  | 2 |
| GO:00617 mitochondri     | 2/272 | 76/18670  | 0.30397  | 0.520474 | 0.448973 | HK2/HIF1A | 2 |
| GO:00170 protein impor   | 4/272 | 192/18670 | 0.306852 | 0.520474 | 0.448973 | PTGS2/RPL | 4 |
| GO:00431 receptor met    | 4/272 | 192/18670 | 0.306852 | 0.520474 | 0.448973 | LMTK2/HIF | 4 |
| GO:00463 ribose phosph   | 4/272 | 192/18670 | 0.306852 | 0.520474 | 0.448973 | DLD/ACSL1 | 4 |

|                                    |           |          |          |          |           |   |
|------------------------------------|-----------|----------|----------|----------|-----------|---|
| GO:000307: renal system p 1/272    | 25/18670  | 0.307286 | 0.520474 | 0.448973 | F2RL1     | 1 |
| GO:000925: mRNA transcr 1/272      | 25/18670  | 0.307286 | 0.520474 | 0.448973 | HIF1A     | 1 |
| GO:003106: hair follicle m 1/272   | 25/18670  | 0.307286 | 0.520474 | 0.448973 | TGM3      | 1 |
| GO:003166: regulation of l 1/272   | 25/18670  | 0.307286 | 0.520474 | 0.448973 | LY96      | 1 |
| GO:003355: histone H2A u 1/272     | 25/18670  | 0.307286 | 0.520474 | 0.448973 | DTX3L     | 1 |
| GO:003411: regulation of l 1/272   | 25/18670  | 0.307286 | 0.520474 | 0.448973 | ABAT      | 1 |
| GO:003525: ionotropic glu 1/272    | 25/18670  | 0.307286 | 0.520474 | 0.448973 | CDK5R1    | 1 |
| GO:003545: vesicle cargo l 1/272   | 25/18670  | 0.307286 | 0.520474 | 0.448973 | PICALM    | 1 |
| GO:004395: negative regul 1/272    | 25/18670  | 0.307286 | 0.520474 | 0.448973 | RGS2      | 1 |
| GO:004406: modulation by 1/272     | 25/18670  | 0.307286 | 0.520474 | 0.448973 | EIF2AK4   | 1 |
| GO:004566: negative regul 1/272    | 25/18670  | 0.307286 | 0.520474 | 0.448973 | IL18      | 1 |
| GO:004585: positive regul 1/272    | 25/18670  | 0.307286 | 0.520474 | 0.448973 | EXOSC3    | 1 |
| GO:004605: GTP metabolic 1/272     | 25/18670  | 0.307286 | 0.520474 | 0.448973 | LRRK2     | 1 |
| GO:004685: phosphatidylr 1/272     | 25/18670  | 0.307286 | 0.520474 | 0.448973 | SYNJ2     | 1 |
| GO:005096: leukocyte tet 1/272     | 25/18670  | 0.307286 | 0.520474 | 0.448973 | GOLPH3    | 1 |
| GO:005099: positive regul 1/272    | 25/18670  | 0.307286 | 0.520474 | 0.448973 | F2RL1     | 1 |
| GO:005115: glucose 6-pho 1/272     | 25/18670  | 0.307286 | 0.520474 | 0.448973 | HK2       | 1 |
| GO:005185: positive regul 1/272    | 25/18670  | 0.307286 | 0.520474 | 0.448973 | MAP4K4    | 1 |
| GO:006055: morphogenes 1/272       | 25/18670  | 0.307286 | 0.520474 | 0.448973 | HIF1A     | 1 |
| GO:006105: regulation of c 1/272   | 25/18670  | 0.307286 | 0.520474 | 0.448973 | RGS2      | 1 |
| GO:007226: cell differentia 1/272  | 25/18670  | 0.307286 | 0.520474 | 0.448973 | STAT1     | 1 |
| GO:007227: metanephric r 1/272     | 25/18670  | 0.307286 | 0.520474 | 0.448973 | STAT1     | 1 |
| GO:190336: (negative regul 1/272   | 25/18670  | 0.307286 | 0.520474 | 0.448973 | RAP1A     | 1 |
| GO:190355: (negative regul 1/272   | 25/18670  | 0.307286 | 0.520474 | 0.448973 | THBS1     | 1 |
| GO:190486: (excitatory syn 1/272   | 25/18670  | 0.307286 | 0.520474 | 0.448973 | NPTN      | 1 |
| GO:190586: (negative regul 1/272   | 25/18670  | 0.307286 | 0.520474 | 0.448973 | TLR2      | 1 |
| GO:200035: (positive regul 1/272   | 25/18670  | 0.307286 | 0.520474 | 0.448973 | THBS1     | 1 |
| GO:005086: (regulation of 16/272   | 314/18670 | 0.308669 | 0.522568 | 0.450779 | PAK2/SIRP | 6 |
| GO:200002: (regulation of 5/272    | 253/18670 | 0.309173 | 0.522716 | 0.450907 | SULF2/STA | 5 |
| GO:000686: (nitric oxide bic 2/272 | 77/18670  | 0.309348 | 0.522716 | 0.450907 | PTGS2/CLE | 2 |
| GO:003135: (negative regul 2/272   | 77/18670  | 0.309348 | 0.522716 | 0.450907 | RPL23/DT  | 2 |
| GO:003245: (positive regul 2/272   | 77/18670  | 0.309348 | 0.522716 | 0.450907 | STAT1/TLR | 2 |
| GO:001825: (peptidyl-threc 3/272   | 134/18670 | 0.310232 | 0.523864 | 0.451897 | LMTK2/CD  | 3 |
| GO:001995: (second-messe 8/272     | 439/18670 | 0.310323 | 0.523864 | 0.451897 | TMBIM4/P  | 8 |
| GO:005067: (regulation of 7/272    | 378/18670 | 0.313662 | 0.527001 | 0.454603 | NKX3-1/SL | 7 |
| GO:000185: (liver developn 3/272   | 135/18670 | 0.314216 | 0.527001 | 0.454603 | SULF2/UPF | 3 |
| GO:005099: (positive regul 3/272   | 135/18670 | 0.314216 | 0.527001 | 0.454603 | F2RL1/THE | 3 |
| GO:190335: (positive regul 3/272   | 135/18670 | 0.314216 | 0.527001 | 0.454603 | GOLGA2/H  | 3 |
| GO:000027: (polysaccharid 2/272    | 78/18670  | 0.314717 | 0.527001 | 0.454603 | IRS2/PPP1 | 2 |
| GO:000836: (associative lea 2/272  | 78/18670  | 0.314717 | 0.527001 | 0.454603 | HIF1A/NPT | 2 |
| GO:003245: (negative regul 2/272   | 78/18670  | 0.314717 | 0.527001 | 0.454603 | HECW2/M   | 2 |
| GO:004224: (tissue regener 2/272   | 78/18670  | 0.314717 | 0.527001 | 0.454603 | IFRD1/BIN | 2 |
| GO:007234: (response to a 2/272    | 78/18670  | 0.314717 | 0.527001 | 0.454603 | FADD/ABA  | 2 |
| GO:000317: (atrioventricul 1/272   | 26/18670  | 0.317391 | 0.527001 | 0.454603 | MDM4      | 1 |
| GO:000335: (epithelial ciliu 1/272 | 26/18670  | 0.317391 | 0.527001 | 0.454603 | ROPN1L    | 1 |
| GO:000705: (microtubule n 1/272    | 26/18670  | 0.317391 | 0.527001 | 0.454603 | GOLGA2    | 1 |
| GO:001075: (regulation of r 1/272  | 26/18670  | 0.317391 | 0.527001 | 0.454603 | THBS1     | 1 |
| GO:001095: (response to a 1/272    | 26/18670  | 0.317391 | 0.527001 | 0.454603 | KIAA0319  | 1 |

|                             |       |           |          |          |          |            |   |
|-----------------------------|-------|-----------|----------|----------|----------|------------|---|
| GO:003015: positive regulat | 1/272 | 26/18670  | 0.317391 | 0.527001 | 0.454603 | THBS1      | 1 |
| GO:003167: negative regul   | 1/272 | 26/18670  | 0.317391 | 0.527001 | 0.454603 | LRRK2      | 1 |
| GO:003228: receptor biosy   | 1/272 | 26/18670  | 0.317391 | 0.527001 | 0.454603 | HIF1A      | 1 |
| GO:003615: phosphatidyle    | 1/272 | 26/18670  | 0.317391 | 0.527001 | 0.454603 | MBOAT1     | 1 |
| GO:004353: regulation of i  | 1/272 | 26/18670  | 0.317391 | 0.527001 | 0.454603 | NKX3-1     | 1 |
| GO:004815: regulation of l  | 1/272 | 26/18670  | 0.317391 | 0.527001 | 0.454603 | NPTN       | 1 |
| GO:005093: regulation of r  | 1/272 | 26/18670  | 0.317391 | 0.527001 | 0.454603 | F2RL1      | 1 |
| GO:005113: regulation of c  | 1/272 | 26/18670  | 0.317391 | 0.527001 | 0.454603 | GMFG       | 1 |
| GO:006003: pharyngeal sy:   | 1/272 | 26/18670  | 0.317391 | 0.527001 | 0.454603 | NKX3-1     | 1 |
| GO:006053: regulation of r  | 1/272 | 26/18670  | 0.317391 | 0.527001 | 0.454603 | FADD       | 1 |
| GO:006070: cell differentia | 1/272 | 26/18670  | 0.317391 | 0.527001 | 0.454603 | EOMES      | 1 |
| GO:006074: prostate glanc   | 1/272 | 26/18670  | 0.317391 | 0.527001 | 0.454603 | NKX3-1     | 1 |
| GO:006203: regulation of r  | 1/272 | 26/18670  | 0.317391 | 0.527001 | 0.454603 | FADD       | 1 |
| GO:007133: cellular respor  | 1/272 | 26/18670  | 0.317391 | 0.527001 | 0.454603 | PRKAR2A    | 1 |
| GO:007163: positive regul   | 1/272 | 26/18670  | 0.317391 | 0.527001 | 0.454603 | CAMK1D     | 1 |
| GO:009953: synaptic mem     | 1/272 | 26/18670  | 0.317391 | 0.527001 | 0.454603 | NTNG2      | 1 |
| GO:015013: positive regul   | 1/272 | 26/18670  | 0.317391 | 0.527001 | 0.454603 | MAP4K4     | 1 |
| GO:190003: positive regul   | 1/272 | 26/18670  | 0.317391 | 0.527001 | 0.454603 | THBS1      | 1 |
| GO:190323: regulation of c  | 1/272 | 26/18670  | 0.317391 | 0.527001 | 0.454603 | HIF1A      | 1 |
| GO:190353: negative regul   | 1/272 | 26/18670  | 0.317391 | 0.527001 | 0.454603 | HDAC4      | 1 |
| GO:190503: regulation of r  | 1/272 | 26/18670  | 0.317391 | 0.527001 | 0.454603 | PICALM     | 1 |
| GO:005073: regulation of r  | 5/272 | 256/18670 | 0.317729 | 0.527314 | 0.454873 | PAK2/UNC   | 5 |
| GO:000663: steroid biosyn   | 4/272 | 196/18670 | 0.319997 | 0.530216 | 0.457377 | HSD17B11   | 4 |
| GO:000703: endosome org     | 2/272 | 79/18670  | 0.320077 | 0.530216 | 0.457377 | AKTIP/EXO  | 2 |
| GO:002163: nerve develop    | 2/272 | 79/18670  | 0.320077 | 0.530216 | 0.457377 | SULF2/CHI  | 2 |
| GO:004563: regulation of r  | 2/272 | 79/18670  | 0.320077 | 0.530216 | 0.457377 | THBS1/TNI  | 2 |
| GO:000663: glycerophosph    | 6/272 | 319/18670 | 0.321433 | 0.532213 | 0.459099 | ACP6/SYNJ  | 6 |
| GO:003463: cellular respor  | 3/272 | 137/18670 | 0.322189 | 0.532967 | 0.459749 | PTGS2/THI  | 3 |
| GO:007263: establishment    | 3/272 | 137/18670 | 0.322189 | 0.532967 | 0.459749 | UBE2D3/H   | 3 |
| GO:001023: endomembra       | 8/272 | 445/18670 | 0.323263 | 0.533772 | 0.460444 | AKTIP/BIN  | 8 |
| GO:000683: mitochondrial    | 5/272 | 258/18670 | 0.32345  | 0.533772 | 0.460444 | UBE2D3/H   | 5 |
| GO:000663: fatty acid met   | 7/272 | 383/18670 | 0.325335 | 0.533772 | 0.460444 | DLD/PTGS   | 7 |
| GO:003303: regulation of s  | 2/272 | 80/18670  | 0.325427 | 0.533772 | 0.460444 | TACC3/HE   | 2 |
| GO:004343: regulation of r  | 2/272 | 80/18670  | 0.325427 | 0.533772 | 0.460444 | IFIT1/PFN2 | 2 |
| GO:004813: Golgi vesicle b  | 2/272 | 80/18670  | 0.325427 | 0.533772 | 0.460444 | GOLPH3/G   | 2 |
| GO:009703: dendritic spin   | 2/272 | 80/18670  | 0.325427 | 0.533772 | 0.460444 | CDK5R1/LF  | 2 |
| GO:004663: alpha-beta T c   | 3/272 | 138/18670 | 0.326176 | 0.533772 | 0.460444 | IL4R/EOMI  | 3 |
| GO:006103: hepaticobiliar   | 3/272 | 138/18670 | 0.326176 | 0.533772 | 0.460444 | SULF2/UPF  | 3 |
| GO:009023: regulation of r  | 5/272 | 259/18670 | 0.326315 | 0.533772 | 0.460444 | PTGS2/RG   | 5 |
| GO:000043: maturation of    | 1/272 | 27/18670  | 0.32735  | 0.533772 | 0.460444 | EXOSC3     | 1 |
| GO:000193: startle respon   | 1/272 | 27/18670  | 0.32735  | 0.533772 | 0.460444 | CHD8       | 1 |
| GO:000673: steroid catabc   | 1/272 | 27/18670  | 0.32735  | 0.533772 | 0.460444 | HSD17B11   | 1 |
| GO:000673: NADH regener     | 1/272 | 27/18670  | 0.32735  | 0.533772 | 0.460444 | HK2        | 1 |
| GO:000693: substrate-dep    | 1/272 | 27/18670  | 0.32735  | 0.533772 | 0.460444 | TNFRSF12   | 1 |
| GO:001813: peptidyl-argin   | 1/272 | 27/18670  | 0.32735  | 0.533772 | 0.460444 | PADI4      | 1 |
| GO:003403: protein localiz  | 1/272 | 27/18670  | 0.32735  | 0.533772 | 0.460444 | GOLPH3     | 1 |
| GO:003643: neuron death     | 1/272 | 27/18670  | 0.32735  | 0.533772 | 0.460444 | HIF1A      | 1 |
| GO:004253: serine phosph    | 1/272 | 27/18670  | 0.32735  | 0.533772 | 0.460444 | CDK5R1     | 1 |

|                                                                 |           |          |          |          |                |   |
|-----------------------------------------------------------------|-----------|----------|----------|----------|----------------|---|
| GO:004688: regulation of transcription factor activity          | 27/18670  | 0.32735  | 0.533772 | 0.460444 | HIF1A          | 1 |
| GO:004814: astrocyte activation                                 | 27/18670  | 0.32735  | 0.533772 | 0.460444 | IFNGR1         | 1 |
| GO:004864: positive regulation of transcription factor activity | 27/18670  | 0.32735  | 0.533772 | 0.460444 | LMOD3          | 1 |
| GO:004866: collateral sprouting                                 | 27/18670  | 0.32735  | 0.533772 | 0.460444 | IFRD1          | 1 |
| GO:005083: positive regulation of transcription factor activity | 27/18670  | 0.32735  | 0.533772 | 0.460444 | THBS1          | 1 |
| GO:006025: regulation of transcription factor activity          | 27/18670  | 0.32735  | 0.533772 | 0.460444 | EIF2AK4        | 1 |
| GO:006162: canonical glycolysis                                 | 27/18670  | 0.32735  | 0.533772 | 0.460444 | HK2            | 1 |
| GO:006171: glucose catabolism                                   | 27/18670  | 0.32735  | 0.533772 | 0.460444 | HK2            | 1 |
| GO:007153: genetic imprinting                                   | 27/18670  | 0.32735  | 0.533772 | 0.460444 | ARID4A         | 1 |
| GO:007226: metanephric crest                                    | 27/18670  | 0.32735  | 0.533772 | 0.460444 | STAT1          | 1 |
| GO:190217: regulation of transcription factor activity          | 27/18670  | 0.32735  | 0.533772 | 0.460444 | HIF1A          | 1 |
| GO:190526: negative regulation of transcription factor activity | 27/18670  | 0.32735  | 0.533772 | 0.460444 | RGS2           | 1 |
| GO:000865: phospholipid transport                               | 260/18670 | 0.329182 | 0.536512 | 0.462808 | ACP6/SYNJ1     | 5 |
| GO:000717: transforming growth factor signaling                 | 199/18670 | 0.329885 | 0.536869 | 0.463115 | USP15/THBS1    | 4 |
| GO:000243: immune response                                      | 139/18670 | 0.330163 | 0.536869 | 0.463115 | RAPGEF1/IFNGR1 | 3 |
| GO:003313: regulation of transcription factor activity          | 139/18670 | 0.330163 | 0.536869 | 0.463115 | TXN/PTGS2      | 3 |
| GO:003809: Fc-gamma receptor signaling                          | 139/18670 | 0.330163 | 0.536869 | 0.463115 | RAPGEF1/IFNGR1 | 3 |
| GO:000864: cellular amino acid transport                        | 81/18670  | 0.330766 | 0.536869 | 0.463115 | UPB1/ABA       | 2 |
| GO:002262: extracellular matrix organization                    | 81/18670  | 0.330766 | 0.536869 | 0.463115 | EXOC8/MMP1     | 2 |
| GO:004804: focal adhesion                                       | 81/18670  | 0.330766 | 0.536869 | 0.463115 | THBS1/MMP1     | 2 |
| GO:004876: astrocyte differentiation                            | 81/18670  | 0.330766 | 0.536869 | 0.463115 | IFNGR1/S1      | 2 |
| GO:006076: negative regulation of transcription factor activity | 81/18670  | 0.330766 | 0.536869 | 0.463115 | F2RL1/RFF      | 2 |
| GO:003386: nucleoside bisphosphate transport                    | 140/18670 | 0.334149 | 0.539097 | 0.465037 | DLD/ACSL1      | 3 |
| GO:003387: ribonucleoside transport                             | 140/18670 | 0.334149 | 0.539097 | 0.465037 | DLD/ACSL1      | 3 |
| GO:003403: purine nucleoside transport                          | 140/18670 | 0.334149 | 0.539097 | 0.465037 | DLD/ACSL1      | 3 |
| GO:006004: cardiac muscle contraction                           | 140/18670 | 0.334149 | 0.539097 | 0.465037 | RGS2/TNNI3     | 3 |
| GO:006007: regulation of transcription factor activity          | 140/18670 | 0.334149 | 0.539097 | 0.465037 | RAB3GAP1       | 3 |
| GO:000728: germ cell development                                | 262/18670 | 0.334925 | 0.539097 | 0.465037 | DLD/ROPN       | 5 |
| GO:001584: organic hydrophobic compound transport               | 262/18670 | 0.334925 | 0.539097 | 0.465037 | NFKBIA/OXLDL   | 5 |
| GO:000332: amino acid transport                                 | 82/18670  | 0.336093 | 0.539097 | 0.465037 | RGS2/SLC3A2    | 2 |
| GO:005511: regulation of transcription factor activity          | 82/18670  | 0.336093 | 0.539097 | 0.465037 | RGS2/HDA       | 2 |
| GO:009004: regulation of transcription factor activity          | 82/18670  | 0.336093 | 0.539097 | 0.465037 | PTGS2/THBS1    | 2 |
| GO:190594: positive regulation of transcription factor activity | 82/18670  | 0.336093 | 0.539097 | 0.465037 | NKX3-1/NF      | 2 |
| GO:000697: response to oxygen                                   | 451/18670 | 0.336301 | 0.539097 | 0.465037 | TXN/PTGS2      | 8 |
| GO:000153: prostaglandin production                             | 28/18670  | 0.337164 | 0.539097 | 0.465037 | PTGS2          | 1 |
| GO:000171: myeloid dendritic cell                               | 28/18670  | 0.337164 | 0.539097 | 0.465037 | CLEC4D         | 1 |
| GO:000697: hyperosmotic response                                | 28/18670  | 0.337164 | 0.539097 | 0.465037 | RCSD1          | 1 |
| GO:000804: motor neuron                                         | 28/18670  | 0.337164 | 0.539097 | 0.465037 | NTNG2          | 1 |
| GO:000826: androgen metabolism                                  | 28/18670  | 0.337164 | 0.539097 | 0.465037 | HSD17B11       | 1 |
| GO:000906: glutamine transport                                  | 28/18670  | 0.337164 | 0.539097 | 0.465037 | PADI4          | 1 |
| GO:000907: aromatic amine transport                             | 28/18670  | 0.337164 | 0.539097 | 0.465037 | HAL            | 1 |
| GO:003264: regulation of transcription factor activity          | 28/18670  | 0.337164 | 0.539097 | 0.465037 | STAT1          | 1 |
| GO:003368: regulation of transcription factor activity          | 28/18670  | 0.337164 | 0.539097 | 0.465037 | EIF2AK2        | 1 |
| GO:003511: embryonic hindbrain                                  | 28/18670  | 0.337164 | 0.539097 | 0.465037 | CHD7           | 1 |
| GO:004557: regulation of transcription factor activity          | 28/18670  | 0.337164 | 0.539097 | 0.465037 | PPP2R3C        | 1 |
| GO:004644: prostanoid biosynthesis                              | 28/18670  | 0.337164 | 0.539097 | 0.465037 | PTGS2          | 1 |
| GO:004852: positive regulation of transcription factor activity | 28/18670  | 0.337164 | 0.539097 | 0.465037 | HDAC4          | 1 |
| GO:006053: prostate gland                                       | 28/18670  | 0.337164 | 0.539097 | 0.465037 | NKX3-1         | 1 |

|                                 |           |          |          |          |            |   |
|---------------------------------|-----------|----------|----------|----------|------------|---|
| GO:00616: glycolytic proc 1/272 | 28/18670  | 0.337164 | 0.539097 | 0.465037 | HK2        | 1 |
| GO:00616: glycolytic proc 1/272 | 28/18670  | 0.337164 | 0.539097 | 0.465037 | HK2        | 1 |
| GO:00700: histone lysine 1/272  | 28/18670  | 0.337164 | 0.539097 | 0.465037 | UTY        | 1 |
| GO:00711: protein localiz 1/272 | 28/18670  | 0.337164 | 0.539097 | 0.465037 | MCM8       | 1 |
| GO:00955: (acetylcholine 1/272  | 28/18670  | 0.337164 | 0.539097 | 0.465037 | CDK5R1     | 1 |
| GO:19027: positive regul 1/272  | 28/18670  | 0.337164 | 0.539097 | 0.465037 | HDAC4      | 1 |
| GO:19907: response to ar 1/272  | 28/18670  | 0.337164 | 0.539097 | 0.465037 | PTGS2      | 1 |
| GO:00017: morphogenes 3/272     | 141/18670 | 0.338135 | 0.539674 | 0.465535 | PSMD12/P   | 3 |
| GO:00018: epithelial to r 3/272 | 141/18670 | 0.338135 | 0.539674 | 0.465535 | PBLD/EOM   | 3 |
| GO:00507: (negative regul 3/272 | 141/18670 | 0.338135 | 0.539674 | 0.465535 | F2RL1/SRG  | 3 |
| GO:00705: protein localiz 3/272 | 141/18670 | 0.338135 | 0.539674 | 0.465535 | UBE2D3/H   | 3 |
| GO:00069: response to o: 2/272  | 83/18670  | 0.341408 | 0.543513 | 0.468847 | PTGS2/RCS  | 2 |
| GO:00354: protein localiz 2/272 | 83/18670  | 0.341408 | 0.543513 | 0.468847 | RAP1A/NP   | 2 |
| GO:00455: positive regul 2/272  | 83/18670  | 0.341408 | 0.543513 | 0.468847 | IL4R/IL18  | 2 |
| GO:00070: Golgi organiza 3/272  | 142/18670 | 0.342119 | 0.543513 | 0.468847 | GOLPH3/G   | 3 |
| GO:00302: regulation of c 4/272 | 203/18670 | 0.343094 | 0.543513 | 0.468847 | TOB1/SRG   | 4 |
| GO:00070: vacuolar trans 3/272  | 143/18670 | 0.346101 | 0.543513 | 0.468847 | AKTIP/LRR  | 3 |
| GO:00308: mammary glai 3/272    | 143/18670 | 0.346101 | 0.543513 | 0.468847 | HK2/HIF1A  | 3 |
| GO:00310: regulation of t 3/272 | 143/18670 | 0.346101 | 0.543513 | 0.468847 | RPS6KA5/J  | 3 |
| GO:00352: regulation of t 3/272 | 143/18670 | 0.346101 | 0.543513 | 0.468847 | F2RL1/PTC  | 3 |
| GO:00977: regulation of t 3/272 | 143/18670 | 0.346101 | 0.543513 | 0.468847 | F2RL1/PTC  | 3 |
| GO:00060: (glucose meta 4/272   | 204/18670 | 0.346399 | 0.543513 | 0.468847 | PFKFB2/HK  | 4 |
| GO:00313: regulation of r 4/272 | 204/18670 | 0.346399 | 0.543513 | 0.468847 | GOLGA2/R   | 4 |
| GO:00347: positive regul 4/272  | 204/18670 | 0.346399 | 0.543513 | 0.468847 | CLTCL1/IR  | 4 |
| GO:00457: positive regul 4/272  | 204/18670 | 0.346399 | 0.543513 | 0.468847 | PTGS2/THI  | 4 |
| GO:00105: (negative regul 2/272 | 84/18670  | 0.346709 | 0.543513 | 0.468847 | GOLGA2/L   | 2 |
| GO:00149: regulation of s 2/272 | 84/18670  | 0.346709 | 0.543513 | 0.468847 | PLAU/HDA   | 2 |
| GO:00454: myoblast diffe 2/272  | 84/18670  | 0.346709 | 0.543513 | 0.468847 | IFRD1/IL18 | 2 |
| GO:00003: mRNA 5'-splic 1/272   | 29/18670  | 0.346835 | 0.543513 | 0.468847 | PSIP1      | 1 |
| GO:00068: extracellular t 1/272 | 29/18670  | 0.346835 | 0.543513 | 0.468847 | ROPN1L     | 1 |
| GO:00072: (nitric oxide m 1/272 | 29/18670  | 0.346835 | 0.543513 | 0.468847 | THBS1      | 1 |
| GO:00076: adult walking 1/272   | 29/18670  | 0.346835 | 0.543513 | 0.468847 | CHD7       | 1 |
| GO:00103: histone mono 1/272    | 29/18670  | 0.346835 | 0.543513 | 0.468847 | DTX3L      | 1 |
| GO:00106: epithelial stru 1/272 | 29/18670  | 0.346835 | 0.543513 | 0.468847 | PBLD       | 1 |
| GO:00108: regulation of c 1/272 | 29/18670  | 0.346835 | 0.543513 | 0.468847 | HDAC4      | 1 |
| GO:00165: histone demei 1/272   | 29/18670  | 0.346835 | 0.543513 | 0.468847 | UTY        | 1 |
| GO:00217: cerebral corte 1/272  | 29/18670  | 0.346835 | 0.543513 | 0.468847 | CDK5R1     | 1 |
| GO:00305: positive regul 1/272  | 29/18670  | 0.346835 | 0.543513 | 0.468847 | THBS1      | 1 |
| GO:00311: positive regul 1/272  | 29/18670  | 0.346835 | 0.543513 | 0.468847 | CDK5R1     | 1 |
| GO:00313: (N-terminal pr 1/272  | 29/18670  | 0.346835 | 0.543513 | 0.468847 | PPM1B      | 1 |
| GO:00343: cell junction r 1/272 | 29/18670  | 0.346835 | 0.543513 | 0.468847 | F2RL1      | 1 |
| GO:00350: positive regul 1/272  | 29/18670  | 0.346835 | 0.543513 | 0.468847 | F2RL1      | 1 |
| GO:00487: epidermis mo 1/272    | 29/18670  | 0.346835 | 0.543513 | 0.468847 | TGM3       | 1 |
| GO:00610: (negative regul 1/272 | 29/18670  | 0.346835 | 0.543513 | 0.468847 | SH3BP5L    | 1 |
| GO:00701: (interleukin-6- 1/272 | 29/18670  | 0.346835 | 0.543513 | 0.468847 | STAT1      | 1 |
| GO:00901: (establishment 1/272  | 29/18670  | 0.346835 | 0.543513 | 0.468847 | GOLPH3     | 1 |
| GO:01200: negative regul 1/272  | 29/18670  | 0.346835 | 0.543513 | 0.468847 | PFN2       | 1 |
| GO:19000: regulation of r 1/272 | 29/18670  | 0.346835 | 0.543513 | 0.468847 | PFN2       | 1 |

|                                |       |           |          |          |          |            |   |
|--------------------------------|-------|-----------|----------|----------|----------|------------|---|
| GO:19026: positive regul       | 1/272 | 29/18670  | 0.346835 | 0.543513 | 0.468847 | CAMK1D     | 1 |
| GO:19038: positive regul       | 1/272 | 29/18670  | 0.346835 | 0.543513 | 0.468847 | THBS1      | 1 |
| GO:20001: negative regul       | 1/272 | 29/18670  | 0.346835 | 0.543513 | 0.468847 | KIAA0319   | 1 |
| GO:20005: negative regul       | 1/272 | 29/18670  | 0.346835 | 0.543513 | 0.468847 | IL4R       | 1 |
| GO:00305: adult behavior       | 3/272 | 144/18670 | 0.350081 | 0.548115 | 0.472816 | FADD/CHD   | 3 |
| GO:00351: regulation of t      | 3/272 | 144/18670 | 0.350081 | 0.548115 | 0.472816 | F2RL1/PTC  | 3 |
| GO:00723: organelle tran       | 2/272 | 85/18670  | 0.351996 | 0.550383 | 0.474773 | KIF1B/HIF1 | 2 |
| GO:19047: regulation of \      | 2/272 | 85/18670  | 0.351996 | 0.550383 | 0.474773 | NQO2/MM    | 2 |
| GO:19908: vascular smoc        | 2/272 | 85/18670  | 0.351996 | 0.550383 | 0.474773 | NQO2/MM    | 2 |
| GO:00024: Fc receptor m        | 3/272 | 145/18670 | 0.354059 | 0.551129 | 0.475417 | RAPGEF1/I  | 3 |
| GO:00072: neuromuscula         | 1/272 | 30/18670  | 0.356366 | 0.551129 | 0.475417 | KIF1B      | 1 |
| GO:00190: reproductive t       | 1/272 | 30/18670  | 0.356366 | 0.551129 | 0.475417 | HDAC4      | 1 |
| GO:00326: interferon- $\alpha$ | 1/272 | 30/18670  | 0.356366 | 0.551129 | 0.475417 | STAT1      | 1 |
| GO:00327: positive regul       | 1/272 | 30/18670  | 0.356366 | 0.551129 | 0.475417 | TLR2       | 1 |
| GO:00327: positive regul       | 1/272 | 30/18670  | 0.356366 | 0.551129 | 0.475417 | CLEC7A     | 1 |
| GO:00344: snRNA 3'-end         | 1/272 | 30/18670  | 0.356366 | 0.551129 | 0.475417 | EXOSC3     | 1 |
| GO:00350: positive regul       | 1/272 | 30/18670  | 0.356366 | 0.551129 | 0.475417 | RPS6KA5    | 1 |
| GO:00427: long-chain fat       | 1/272 | 30/18670  | 0.356366 | 0.551129 | 0.475417 | PTGS2      | 1 |
| GO:00431: peptide catab        | 1/272 | 30/18670  | 0.356366 | 0.551129 | 0.475417 | ANPEP      | 1 |
| GO:00447: modulation by        | 1/272 | 30/18670  | 0.356366 | 0.551129 | 0.475417 | EIF2AK4    | 1 |
| GO:00463: regulation of f      | 1/272 | 30/18670  | 0.356366 | 0.551129 | 0.475417 | IRS2       | 1 |
| GO:00465: regulation of \      | 1/272 | 30/18670  | 0.356366 | 0.551129 | 0.475417 | TRIM25     | 1 |
| GO:00466: regulation of :      | 1/272 | 30/18670  | 0.356366 | 0.551129 | 0.475417 | IL18       | 1 |
| GO:00482: response to p:       | 1/272 | 30/18670  | 0.356366 | 0.551129 | 0.475417 | THBS1      | 1 |
| GO:00508: negative regul       | 1/272 | 30/18670  | 0.356366 | 0.551129 | 0.475417 | MNDA       | 1 |
| GO:00618: microtubule o        | 1/272 | 30/18670  | 0.356366 | 0.551129 | 0.475417 | ARPC5      | 1 |
| GO:00709: protein K11-lir      | 1/272 | 30/18670  | 0.356366 | 0.551129 | 0.475417 | UBE2D3     | 1 |
| GO:00714: cellular respor      | 1/272 | 30/18670  | 0.356366 | 0.551129 | 0.475417 | RPL26      | 1 |
| GO:00903: positive regul       | 1/272 | 30/18670  | 0.356366 | 0.551129 | 0.475417 | CDK5R1     | 1 |
| GO:19048: beta-catenin-1       | 1/272 | 30/18670  | 0.356366 | 0.551129 | 0.475417 | TLE4       | 1 |
| GO:19051: response to ac       | 1/272 | 30/18670  | 0.356366 | 0.551129 | 0.475417 | CDK5R1     | 1 |
| GO:19051: cellular respor      | 1/272 | 30/18670  | 0.356366 | 0.551129 | 0.475417 | CDK5R1     | 1 |
| GO:19054: negative regul       | 1/272 | 30/18670  | 0.356366 | 0.551129 | 0.475417 | PICALM     | 1 |
| GO:19056: regulation of r      | 1/272 | 30/18670  | 0.356366 | 0.551129 | 0.475417 | NTNG2      | 1 |
| GO:00346: cellular carbol      | 2/272 | 86/18670  | 0.357269 | 0.552044 | 0.476205 | IRS2/PPP1  | 2 |
| GO:00905: regulation of r      | 2/272 | 86/18670  | 0.357269 | 0.552044 | 0.476205 | HK2/HEBP   | 2 |
| GO:00459: positive regul       | 5/272 | 270/18670 | 0.357971 | 0.552743 | 0.476809 | RPS6KA3/I  | 5 |
| GO:00425: response to h        | 3/272 | 146/18670 | 0.358034 | 0.552743 | 0.476809 | TXN/STAT1  | 3 |
| GO:00018: embryonic pla        | 2/272 | 87/18670  | 0.362526 | 0.555075 | 0.47882  | EOMES/HI   | 2 |
| GO:00303: flagellated spe      | 2/272 | 87/18670  | 0.362526 | 0.555075 | 0.47882  | ROPN1L/SI  | 2 |
| GO:00977: sperm motility       | 2/272 | 87/18670  | 0.362526 | 0.555075 | 0.47882  | ROPN1L/SI  | 2 |
| GO:19021: regulation of l      | 5/272 | 272/18670 | 0.363745 | 0.555075 | 0.47882  | PPP2R3C/I  | 5 |
| GO:00075: blood coagula        | 6/272 | 336/18670 | 0.365308 | 0.555075 | 0.47882  | PLAU/F2RL  | 6 |
| GO:00321: negative regul       | 7/272 | 400/18670 | 0.365477 | 0.555075 | 0.47882  | PLAU/THB   | 7 |
| GO:00019: synaptic trans       | 1/272 | 31/18670  | 0.365758 | 0.555075 | 0.47882  | PTGS2      | 1 |
| GO:00026: positive regul       | 1/272 | 31/18670  | 0.365758 | 0.555075 | 0.47882  | PTGS2      | 1 |
| GO:00032: muscle hypert        | 1/272 | 31/18670  | 0.365758 | 0.555075 | 0.47882  | HDAC4      | 1 |
| GO:00064: protein demet        | 1/272 | 31/18670  | 0.365758 | 0.555075 | 0.47882  | UTY        | 1 |



|                                                 |       |           |          |          |          |            |   |
|-------------------------------------------------|-------|-----------|----------|----------|----------|------------|---|
| GO:000650: GPI anchor biogenesis                | 1/272 | 31/18670  | 0.365758 | 0.555075 | 0.47882  | MPPE1      | 1 |
| GO:000823: protein dealkylation                 | 1/272 | 31/18670  | 0.365758 | 0.555075 | 0.47882  | UTY        | 1 |
| GO:000913: purine ribonucleoside biosynthesis   | 1/272 | 31/18670  | 0.365758 | 0.555075 | 0.47882  | PDE7A      | 1 |
| GO:000993: proximal/distal development          | 1/272 | 31/18670  | 0.365758 | 0.555075 | 0.47882  | PBX2       | 1 |
| GO:001054: regulation of transcription          | 1/272 | 31/18670  | 0.365758 | 0.555075 | 0.47882  | ABAT       | 1 |
| GO:001071: negative regulation of transcription | 1/272 | 31/18670  | 0.365758 | 0.555075 | 0.47882  | PBLD       | 1 |
| GO:001483: cardiac muscle cell development      | 1/272 | 31/18670  | 0.365758 | 0.555075 | 0.47882  | HDAC4      | 1 |
| GO:001485: cardiac muscle cell development      | 1/272 | 31/18670  | 0.365758 | 0.555075 | 0.47882  | HDAC4      | 1 |
| GO:003014: sphingolipid catabolism              | 1/272 | 31/18670  | 0.365758 | 0.555075 | 0.47882  | ASAH1      | 1 |
| GO:003043: sleep                                | 1/272 | 31/18670  | 0.365758 | 0.555075 | 0.47882  | IL18       | 1 |
| GO:003271: positive regulation of transcription | 1/272 | 31/18670  | 0.365758 | 0.555075 | 0.47882  | HIF1A      | 1 |
| GO:003315: response to acid                     | 1/272 | 31/18670  | 0.365758 | 0.555075 | 0.47882  | PTGS2      | 1 |
| GO:003368: osteoblast proliferation             | 1/272 | 31/18670  | 0.365758 | 0.555075 | 0.47882  | EIF2AK2    | 1 |
| GO:003461: ncRNA catabolism                     | 1/272 | 31/18670  | 0.365758 | 0.555075 | 0.47882  | EXOSC3     | 1 |
| GO:003576: endothelial cell development         | 1/272 | 31/18670  | 0.365758 | 0.555075 | 0.47882  | THBS1      | 1 |
| GO:004001: positive regulation of transcription | 1/272 | 31/18670  | 0.365758 | 0.555075 | 0.47882  | CHD7       | 1 |
| GO:004331: regulation of transcription          | 1/272 | 31/18670  | 0.365758 | 0.555075 | 0.47882  | IL4R       | 1 |
| GO:004345: regulation of transcription          | 1/272 | 31/18670  | 0.365758 | 0.555075 | 0.47882  | HIF1A      | 1 |
| GO:004573: positive regulation of transcription | 1/272 | 31/18670  | 0.365758 | 0.555075 | 0.47882  | CDK5R1     | 1 |
| GO:005148: positive regulation of transcription | 1/272 | 31/18670  | 0.365758 | 0.555075 | 0.47882  | F2RL1      | 1 |
| GO:009001: relaxation of transcription          | 1/272 | 31/18670  | 0.365758 | 0.555075 | 0.47882  | RGS2       | 1 |
| GO:009061: walking behavior                     | 1/272 | 31/18670  | 0.365758 | 0.555075 | 0.47882  | CHD7       | 1 |
| GO:009711: postsynaptic cell development        | 1/272 | 31/18670  | 0.365758 | 0.555075 | 0.47882  | CDH2       | 1 |
| GO:009911: regulation of transcription          | 1/272 | 31/18670  | 0.365758 | 0.555075 | 0.47882  | NTNG2      | 1 |
| GO:190218: regulation of transcription          | 1/272 | 31/18670  | 0.365758 | 0.555075 | 0.47882  | TRIM25     | 1 |
| GO:190225: regulation of transcription          | 1/272 | 31/18670  | 0.365758 | 0.555075 | 0.47882  | RPL26      | 1 |
| GO:190285: positive regulation of transcription | 1/272 | 31/18670  | 0.365758 | 0.555075 | 0.47882  | HIF1A      | 1 |
| GO:200041: positive regulation of transcription | 1/272 | 31/18670  | 0.365758 | 0.555075 | 0.47882  | FADD       | 1 |
| GO:200078: positive regulation of transcription | 1/272 | 31/18670  | 0.365758 | 0.555075 | 0.47882  | DTX3L      | 1 |
| GO:000275: negative regulation of transcription | 3/272 | 148/18670 | 0.365973 | 0.555075 | 0.47882  | F2RL1/SRC  | 3 |
| GO:005155: response to cytokine                 | 3/272 | 148/18670 | 0.365973 | 0.555075 | 0.47882  | THBS1/ALC  | 3 |
| GO:000676: water-soluble ion transport          | 2/272 | 88/18670  | 0.367767 | 0.55589  | 0.479523 | LMBRD1/V   | 2 |
| GO:004593: positive regulation of transcription | 2/272 | 88/18670  | 0.367767 | 0.55589  | 0.479523 | F2RL1/IL4F | 2 |
| GO:005082: defense response                     | 2/272 | 88/18670  | 0.367767 | 0.55589  | 0.479523 | F2RL1/CAN  | 2 |
| GO:007005: chemokine-mediated response          | 2/272 | 88/18670  | 0.367767 | 0.55589  | 0.479523 | HIF1A/CXC  | 2 |
| GO:009715: execution phase of cell cycle        | 2/272 | 88/18670  | 0.367767 | 0.55589  | 0.479523 | PAK2/RFFL  | 2 |
| GO:010601: neuron projection morphogenesis      | 2/272 | 88/18670  | 0.367767 | 0.55589  | 0.479523 | CDK5R1/LF  | 2 |
| GO:190241: chloride transport                   | 2/272 | 88/18670  | 0.367767 | 0.55589  | 0.479523 | CLCC1/SLC  | 2 |
| GO:190333: negative regulation of transcription | 2/272 | 88/18670  | 0.367767 | 0.55589  | 0.479523 | RPL23/DTR  | 2 |
| GO:000926: cellular response to stress          | 3/272 | 149/18670 | 0.369937 | 0.558931 | 0.482147 | EIF2AK2/EI | 3 |
| GO:002241: regulation of transcription          | 7/272 | 402/18670 | 0.370231 | 0.559137 | 0.482324 | PAK2/SIRP  | 7 |
| GO:001993: cyclic nucleotide signaling          | 4/272 | 212/18670 | 0.372843 | 0.560857 | 0.483808 | PRKAR2A/   | 4 |
| GO:000715: adenylate cyclase activity           | 2/272 | 89/18670  | 0.372991 | 0.560857 | 0.483808 | RGS2/OXEI  | 2 |
| GO:003241: negative regulation of transcription | 2/272 | 89/18670  | 0.372991 | 0.560857 | 0.483808 | HECW2/M    | 2 |
| GO:006105: somite development                   | 2/272 | 89/18670  | 0.372991 | 0.560857 | 0.483808 | PPP2R3A/I  | 2 |
| GO:000191: response to androgen                 | 1/272 | 32/18670  | 0.375013 | 0.560857 | 0.483808 | RGS2       | 1 |
| GO:000333: metanephros development              | 1/272 | 32/18670  | 0.375013 | 0.560857 | 0.483808 | STAT1      | 1 |
| GO:000650: GPI anchor biosynthesis              | 1/272 | 32/18670  | 0.375013 | 0.560857 | 0.483808 | MPPE1      | 1 |

|                            |         |           |          |          |          |           |   |
|----------------------------|---------|-----------|----------|----------|----------|-----------|---|
| GO:00076: long-term mei    | 1/272   | 32/18670  | 0.375013 | 0.560857 | 0.483808 | EIF2AK4   | 1 |
| GO:00092: ribonucleotide   | 1/272   | 32/18670  | 0.375013 | 0.560857 | 0.483808 | PDE7A     | 1 |
| GO:00108: regulation of r  | 1/272   | 32/18670  | 0.375013 | 0.560857 | 0.483808 | CHD7      | 1 |
| GO:00328: regulation of r  | 1/272   | 32/18670  | 0.375013 | 0.560857 | 0.483808 | IL18      | 1 |
| GO:00330: (regulation of r | 1/272   | 32/18670  | 0.375013 | 0.560857 | 0.483808 | IL4R      | 1 |
| GO:00423: vasodilation     | 1/272   | 32/18670  | 0.375013 | 0.560857 | 0.483808 | RGS2      | 1 |
| GO:00459: (positive regul  | 1/272   | 32/18670  | 0.375013 | 0.560857 | 0.483808 | PTGS2     | 1 |
| GO:00550: negative regul   | 1/272   | 32/18670  | 0.375013 | 0.560857 | 0.483808 | RGS2      | 1 |
| GO:00611: negative regul   | 1/272   | 32/18670  | 0.375013 | 0.560857 | 0.483808 | RGS2      | 1 |
| GO:00613: heart trabecul   | 1/272   | 32/18670  | 0.375013 | 0.560857 | 0.483808 | CHD7      | 1 |
| GO:00702: (protein homo    | 1/272   | 32/18670  | 0.375013 | 0.560857 | 0.483808 | ALOX5AP   | 1 |
| GO:00705: regulation of r  | 1/272   | 32/18670  | 0.375013 | 0.560857 | 0.483808 | MAP4K4    | 1 |
| GO:00713: cellular respor  | 1/272   | 32/18670  | 0.375013 | 0.560857 | 0.483808 | IL4R      | 1 |
| GO:19022: regulation of    | 1/272   | 32/18670  | 0.375013 | 0.560857 | 0.483808 | LRRK2     | 1 |
| GO:19039: positive regul   | 1/272   | 32/18670  | 0.375013 | 0.560857 | 0.483808 | UBE2D3    | 1 |
| GO:20007: positive regul   | 1/272   | 32/18670  | 0.375013 | 0.560857 | 0.483808 | F2RL1     | 1 |
| GO:00074: axon guidance    | 5/272   | 276/18670 | 0.375298 | 0.561045 | 0.48397  | RPS6KA5/1 | 5 |
| GO:00974: neuron projec    | 5/272   | 277/18670 | 0.378186 | 0.564094 | 0.4866   | RPS6KA5/1 | 5 |
| GO:00016: metanephros      | 2/272   | 90/18670  | 0.378198 | 0.564094 | 0.4866   | NKX3-1/ST | 2 |
| GO:00432: regulation of    | 2/272   | 90/18670  | 0.378198 | 0.564094 | 0.4866   | IRS2/PPP1 | 2 |
| GO:00513: (chromosome      | 2/272   | 90/18670  | 0.378198 | 0.564094 | 0.4866   | TACC3/HEC | 2 |
| GO:00716: mononuclear      | 2/272   | 90/18670  | 0.378198 | 0.564094 | 0.4866   | THBS1/S1C | 2 |
| GO:00075: hemostasis       | 6/272   | 341/18670 | 0.378294 | 0.564094 | 0.4866   | PLAU/F2RL | 6 |
| GO:00508: coagulation      | 6/272   | 342/18670 | 0.380892 | 0.566362 | 0.488557 | PLAU/F2RL | 6 |
| GO:00091: (nucleotide bic  | 5/272   | 278/18670 | 0.381074 | 0.566362 | 0.488557 | DLD/PTGS: | 5 |
| GO:00001: activation of    | 1/3/272 | 152/18670 | 0.3818   | 0.566362 | 0.488557 | THBS1/MA  | 3 |
| GO:00162: (regulation of   | 3/272   | 152/18670 | 0.3818   | 0.566362 | 0.488557 | RGS2/HDA  | 3 |
| GO:00080: cell recognitio  | 4/272   | 215/18670 | 0.382746 | 0.566362 | 0.488557 | CLEC7A/FC | 4 |
| GO:00604: mesenchyme       | 5/272   | 279/18670 | 0.383962 | 0.566362 | 0.488557 | STAT1/PBL | 5 |
| GO:00063: 7-methylguan     | 1/272   | 33/18670  | 0.384134 | 0.566362 | 0.488557 | POLR2J    | 1 |
| GO:00091: (nucleoside cat  | 1/272   | 33/18670  | 0.384134 | 0.566362 | 0.488557 | UPB1      | 1 |
| GO:00107: protein kinase   | 1/272   | 33/18670  | 0.384134 | 0.566362 | 0.488557 | LRRK2     | 1 |
| GO:00140: response to is   | 1/272   | 33/18670  | 0.384134 | 0.566362 | 0.488557 | FADD      | 1 |
| GO:00162: negative regul   | 1/272   | 33/18670  | 0.384134 | 0.566362 | 0.488557 | LRRK2     | 1 |
| GO:00308: granulocyte di   | 1/272   | 33/18670  | 0.384134 | 0.566362 | 0.488557 | EVI2B     | 1 |
| GO:00311: positive regul   | 1/272   | 33/18670  | 0.384134 | 0.566362 | 0.488557 | CDK5R1    | 1 |
| GO:00357: positive regul   | 1/272   | 33/18670  | 0.384134 | 0.566362 | 0.488557 | HIF1A     | 1 |
| GO:00360: (positive regul  | 1/272   | 33/18670  | 0.384134 | 0.566362 | 0.488557 | HIF1A     | 1 |
| GO:00432: response to m    | 1/272   | 33/18670  | 0.384134 | 0.566362 | 0.488557 | FADD      | 1 |
| GO:00439: exonucleolytic   | 1/272   | 33/18670  | 0.384134 | 0.566362 | 0.488557 | EXOSC3    | 1 |
| GO:00451: regulation of i  | 1/272   | 33/18670  | 0.384134 | 0.566362 | 0.488557 | EXOSC3    | 1 |
| GO:00466: alpha-beta T c   | 1/272   | 33/18670  | 0.384134 | 0.566362 | 0.488557 | IL18      | 1 |
| GO:00488: erythrocyte d    | 1/272   | 33/18670  | 0.384134 | 0.566362 | 0.488557 | ARID4A    | 1 |
| GO:00488: brain morpho     | 1/272   | 33/18670  | 0.384134 | 0.566362 | 0.488557 | CDH2      | 1 |
| GO:00507: positive regul   | 1/272   | 33/18670  | 0.384134 | 0.566362 | 0.488557 | ORM2      | 1 |
| GO:00514: positive regul   | 1/272   | 33/18670  | 0.384134 | 0.566362 | 0.488557 | GOLGA2    | 1 |
| GO:19012: negative regul   | 1/272   | 33/18670  | 0.384134 | 0.566362 | 0.488557 | PPM1B     | 1 |
| GO:19017: negative regul   | 1/272   | 33/18670  | 0.384134 | 0.566362 | 0.488557 | RFFL      | 1 |

|                                   |           |          |          |          |            |   |
|-----------------------------------|-----------|----------|----------|----------|------------|---|
| GO:20007: positive regul:1/272    | 33/18670  | 0.384134 | 0.566362 | 0.488557 | RPS6KA5    | 1 |
| GO:20010: positive regul:1/272    | 33/18670  | 0.384134 | 0.566362 | 0.488557 | LRRK2      | 1 |
| GO:00510: actin filament 3/272    | 153/18670 | 0.385743 | 0.568498 | 0.490399 | PFN2/PHA   | 3 |
| GO:00357: CD4-positive, 2/272     | 92/18670  | 0.388556 | 0.572405 | 0.49377  | IL4R/IL18  | 2 |
| GO:00075: muscle organ 7/272      | 410/18670 | 0.38928  | 0.572842 | 0.494146 | SAP30/BIN  | 7 |
| GO:00464: glycerophosph:4/272     | 217/18670 | 0.389338 | 0.572842 | 0.494146 | ACP6/SYNJ  | 4 |
| GO:00509: regulation of c:4/272   | 217/18670 | 0.389338 | 0.572842 | 0.494146 | F2RL1/THE  | 4 |
| GO:00610: membrane fu:3/272       | 154/18670 | 0.389682 | 0.573077 | 0.494349 | FOLR3/STX  | 3 |
| GO:19012: nucleoside ph:5/272     | 282/18670 | 0.392622 | 0.573077 | 0.494349 | DLD/PTGS:  | 5 |
| GO:00100: glial cell differ:4/272 | 218/18670 | 0.392631 | 0.573077 | 0.494349 | IFNGR1/S1  | 4 |
| GO:00197: calcium-medi:4/272      | 218/18670 | 0.392631 | 0.573077 | 0.494349 | TMBIM4/T   | 4 |
| GO:00060: tricarboxylic a:1/272   | 34/18670  | 0.393123 | 0.573077 | 0.494349 | DLD        | 1 |
| GO:00064: tRNA export fi:1/272    | 34/18670  | 0.393123 | 0.573077 | 0.494349 | RAE1       | 1 |
| GO:00065: glutamate me:1/272      | 34/18670  | 0.393123 | 0.573077 | 0.494349 | HAL        | 1 |
| GO:00074: salivary gland:1/272    | 34/18670  | 0.393123 | 0.573077 | 0.494349 | NKX3-1     | 1 |
| GO:00094: 7-methylguan:1/272      | 34/18670  | 0.393123 | 0.573077 | 0.494349 | POLR2J     | 1 |
| GO:00109: positive regul:1/272    | 34/18670  | 0.393123 | 0.573077 | 0.494349 | PPP1R12A   | 1 |
| GO:00164: peptide horm:1/272      | 34/18670  | 0.393123 | 0.573077 | 0.494349 | MME        | 1 |
| GO:00326: regulation of i:1/272   | 34/18670  | 0.393123 | 0.573077 | 0.494349 | IL18       | 1 |
| GO:00362: RNA capping:1/272       | 34/18670  | 0.393123 | 0.573077 | 0.494349 | POLR2J     | 1 |
| GO:00435: regulation of l:1/272   | 34/18670  | 0.393123 | 0.573077 | 0.494349 | RPL26      | 1 |
| GO:00459: negative regul:1/272    | 34/18670  | 0.393123 | 0.573077 | 0.494349 | RAP1A      | 1 |
| GO:00607: cell fate com:1/272     | 34/18670  | 0.393123 | 0.573077 | 0.494349 | EOMES      | 1 |
| GO:00706: response to in:1/272    | 34/18670  | 0.393123 | 0.573077 | 0.494349 | IL4R       | 1 |
| GO:00714: tRNA-contain:1/272      | 34/18670  | 0.393123 | 0.573077 | 0.494349 | RAE1       | 1 |
| GO:00718: adrenergic rec:1/272    | 34/18670  | 0.393123 | 0.573077 | 0.494349 | RGS2       | 1 |
| GO:01404: signaling rece:1/272    | 34/18670  | 0.393123 | 0.573077 | 0.494349 | MME        | 1 |
| GO:19018: regulation of r:3/272   | 155/18670 | 0.393613 | 0.573077 | 0.494349 | RGS2/HDA   | 3 |
| GO:00000: autophagosom:2/272      | 93/18670  | 0.393707 | 0.573077 | 0.494349 | RAB3GAP1   | 2 |
| GO:00030: regulation of s:2/272   | 93/18670  | 0.393707 | 0.573077 | 0.494349 | F2RL1/MV   | 2 |
| GO:00075: body fluid sec:2/272    | 93/18670  | 0.393707 | 0.573077 | 0.494349 | HK2/HIF1A  | 2 |
| GO:00332: response to vi:2/272    | 93/18670  | 0.393707 | 0.573077 | 0.494349 | PTGS2/TRI  | 2 |
| GO:00466: regulation of e:2/272   | 93/18670  | 0.393707 | 0.573077 | 0.494349 | IL4R/IL18  | 2 |
| GO:00421: regulation of l:3/272   | 156/18670 | 0.397539 | 0.576351 | 0.497173 | TNFSF13B/  | 3 |
| GO:00435: regulation of t:3/272   | 156/18670 | 0.397539 | 0.576351 | 0.497173 | PTGS2/THI  | 3 |
| GO:00486: regulation of r:3/272   | 156/18670 | 0.397539 | 0.576351 | 0.497173 | RGS2/HDA   | 3 |
| GO:00316: regulation of f:5/272   | 284/18670 | 0.398391 | 0.576351 | 0.497173 | PFN2/MDM   | 5 |
| GO:00464: glycerolipid m:7/272    | 414/18670 | 0.398815 | 0.576351 | 0.497173 | ACP6/ACSI  | 7 |
| GO:00069: vesicle fusion:2/272    | 94/18670  | 0.398838 | 0.576351 | 0.497173 | STX10/TAF  | 2 |
| GO:00609: kidney morph:2/272      | 94/18670  | 0.398838 | 0.576351 | 0.497173 | STAT1/LRR  | 2 |
| GO:00701: regulation of t:2/272   | 94/18670  | 0.398838 | 0.576351 | 0.497173 | SRGN/HIF1  | 2 |
| GO:01101: regulation of t:2/272   | 94/18670  | 0.398838 | 0.576351 | 0.497173 | SRGN/HIF1  | 2 |
| GO:19024: protein localiz:2/272   | 94/18670  | 0.398838 | 0.576351 | 0.497173 | RAP1A/NP   | 2 |
| GO:00071: transmembran:6/272      | 349/18670 | 0.399085 | 0.576351 | 0.497173 | USP15/TOI  | 6 |
| GO:00487: mesenchymal:4/272       | 220/18670 | 0.399209 | 0.576351 | 0.497173 | STAT1/PBL  | 4 |
| GO:00349: response to ei:5/272    | 285/18670 | 0.401273 | 0.576351 | 0.497173 | THBS1/EIF: | 5 |
| GO:00017: neuron migrat:3/272     | 157/18670 | 0.401457 | 0.576351 | 0.497173 | KIAA0319/  | 3 |
| GO:00615: actin filament:3/272    | 157/18670 | 0.401457 | 0.576351 | 0.497173 | PFN2/PHA   | 3 |

|                                   |           |          |          |          |            |   |
|-----------------------------------|-----------|----------|----------|----------|------------|---|
| GO:000026: mitochondrial 1/272    | 35/18670  | 0.40198  | 0.576351 | 0.497173 | LRRK2      | 1 |
| GO:000027: nuclear-transc 1/272   | 35/18670  | 0.40198  | 0.576351 | 0.497173 | EXOSC3     | 1 |
| GO:000041: maturation of 1/272    | 35/18670  | 0.40198  | 0.576351 | 0.497173 | RPS16      | 1 |
| GO:000181: receptor recyc 1/272   | 35/18670  | 0.40198  | 0.576351 | 0.497173 | LMTK2      | 1 |
| GO:000182: maternal plac 1/272    | 35/18670  | 0.40198  | 0.576351 | 0.497173 | PTGS2      | 1 |
| GO:000321: endocardial c 1/272    | 35/18670  | 0.40198  | 0.576351 | 0.497173 | MDM4       | 1 |
| GO:000322: cardiac atrium 1/272   | 35/18670  | 0.40198  | 0.576351 | 0.497173 | MDM4       | 1 |
| GO:001021: multicellular c 1/272  | 35/18670  | 0.40198  | 0.576351 | 0.497173 | LRRK2      | 1 |
| GO:001561: organic cation 1/272   | 35/18670  | 0.40198  | 0.576351 | 0.497173 | SLC25A20   | 1 |
| GO:001901: viral release fr 1/272 | 35/18670  | 0.40198  | 0.576351 | 0.497173 | TRIM25     | 1 |
| GO:003281: receptor catal 1/272   | 35/18670  | 0.40198  | 0.576351 | 0.497173 | DTX3L      | 1 |
| GO:003331: secretory gran 1/272   | 35/18670  | 0.40198  | 0.576351 | 0.497173 | SRGN       | 1 |
| GO:003581: exit from host 1/272   | 35/18670  | 0.40198  | 0.576351 | 0.497173 | TRIM25     | 1 |
| GO:003582: exit from host 1/272   | 35/18670  | 0.40198  | 0.576351 | 0.497173 | TRIM25     | 1 |
| GO:003591: aorta morpho 1/272     | 35/18670  | 0.40198  | 0.576351 | 0.497173 | CHD7       | 1 |
| GO:004641: membrane lip 1/272     | 35/18670  | 0.40198  | 0.576351 | 0.497173 | ASAH1      | 1 |
| GO:005131: negative regul 1/272   | 35/18670  | 0.40198  | 0.576351 | 0.497173 | LRRK2      | 1 |
| GO:006031: regulation of t 1/272  | 35/18670  | 0.40198  | 0.576351 | 0.497173 | FADD       | 1 |
| GO:007041: nucleotide-bir 1/272   | 35/18670  | 0.40198  | 0.576351 | 0.497173 | NFKBIA     | 1 |
| GO:009881: regulation of r 1/272  | 35/18670  | 0.40198  | 0.576351 | 0.497173 | F2RL1      | 1 |
| GO:011011: negative regul 1/272   | 35/18670  | 0.40198  | 0.576351 | 0.497173 | STAT1      | 1 |
| GO:190401: positive regul 1/272   | 35/18670  | 0.40198  | 0.576351 | 0.497173 | CDK5R1     | 1 |
| GO:001921: regulation of f 2/272  | 96/18670  | 0.40904  | 0.582963 | 0.502877 | PTGS2/IRS  | 2 |
| GO:003021: megakaryocyt 2/272     | 96/18670  | 0.40904  | 0.582963 | 0.502877 | THBS1/TNFI | 2 |
| GO:009731: response to ar 2/272   | 96/18670  | 0.40904  | 0.582963 | 0.502877 | KIF1B/RAP  | 2 |
| GO:009882: vesicle-media 2/272    | 96/18670  | 0.40904  | 0.582963 | 0.502877 | GOLPH3/E   | 2 |
| GO:190501: autophagosome 2/272    | 96/18670  | 0.40904  | 0.582963 | 0.502877 | RAB3GAP1   | 2 |
| GO:002261: regulation of c 8/272  | 484/18670 | 0.40905  | 0.582963 | 0.502877 | ZMYM2/IF   | 8 |
| GO:004541: fat cell differe 4/272 | 223/18670 | 0.409053 | 0.582963 | 0.502877 | PTGS2/RGS  | 4 |
| GO:000721: receptor signa 3/272   | 159/18670 | 0.409273 | 0.582963 | 0.502877 | STAT1/CDI  | 3 |
| GO:000231: mucosal immu 1/272     | 36/18670  | 0.410709 | 0.582963 | 0.502877 | CAMP       | 1 |
| GO:000301: renal water hc 1/272   | 36/18670  | 0.410709 | 0.582963 | 0.502877 | PRKAR2A    | 1 |
| GO:000621: pyrimidine nu 1/272    | 36/18670  | 0.410709 | 0.582963 | 0.502877 | UPB1       | 1 |
| GO:000661: bile acid biosy 1/272  | 36/18670  | 0.410709 | 0.582963 | 0.502877 | OSBPL9     | 1 |
| GO:000911: purine ribonu 1/272    | 36/18670  | 0.410709 | 0.582963 | 0.502877 | NT5C2      | 1 |
| GO:001481: release of seq 1/272   | 36/18670  | 0.410709 | 0.582963 | 0.502877 | CHD7       | 1 |
| GO:001611: snRNA proces 1/272     | 36/18670  | 0.410709 | 0.582963 | 0.502877 | EXOSC3     | 1 |
| GO:003091: regulation of v 1/272  | 36/18670  | 0.410709 | 0.582963 | 0.502877 | HIF1A      | 1 |
| GO:003351: transferrin tra 1/272  | 36/18670  | 0.410709 | 0.582963 | 0.502877 | LMTK2      | 1 |
| GO:003371: response to gl 1/272   | 36/18670  | 0.410709 | 0.582963 | 0.502877 | PRKAR2A    | 1 |
| GO:003511: hindlimb mor 1/272     | 36/18670  | 0.410709 | 0.582963 | 0.502877 | CHD7       | 1 |
| GO:003583: nucleotide-bir 1/272   | 36/18670  | 0.410709 | 0.582963 | 0.502877 | NFKBIA     | 1 |
| GO:004391: positive regul 1/272   | 36/18670  | 0.410709 | 0.582963 | 0.502877 | HDAC4      | 1 |
| GO:005101: tRNA transpor 1/272    | 36/18670  | 0.410709 | 0.582963 | 0.502877 | RAE1       | 1 |
| GO:009031: regulation of r 1/272  | 36/18670  | 0.410709 | 0.582963 | 0.502877 | CDK5R1     | 1 |
| GO:190101: negative regul 1/272   | 36/18670  | 0.410709 | 0.582963 | 0.502877 | IFI6       | 1 |
| GO:200121: negative regul 1/272   | 36/18670  | 0.410709 | 0.582963 | 0.502877 | IFI6       | 1 |
| GO:000691: regulation of s 2/272  | 97/18670  | 0.414109 | 0.586144 | 0.505621 | RGS2/HDA   | 2 |

|                                  |           |          |          |          |            |   |
|----------------------------------|-----------|----------|----------|----------|------------|---|
| GO:000704: cell-substrate 2/272  | 97/18670  | 0.414109 | 0.586144 | 0.505621 | THBS1/MA   | 2 |
| GO:001077: negative regul 2/272  | 97/18670  | 0.414109 | 0.586144 | 0.505621 | IFRD1/CDK  | 2 |
| GO:004277: mitochondrial 2/272   | 97/18670  | 0.414109 | 0.586144 | 0.505621 | DLD/COX7   | 2 |
| GO:015011: cell-substrate 2/272  | 97/18670  | 0.414109 | 0.586144 | 0.505621 | THBS1/MA   | 2 |
| GO:199086: response to cl 2/272  | 97/18670  | 0.414109 | 0.586144 | 0.505621 | HIF1A/CXC  | 2 |
| GO:199086: cellular respor 2/272 | 97/18670  | 0.414109 | 0.586144 | 0.505621 | HIF1A/CXC  | 2 |
| GO:000716: cell-matrix ad 4/272  | 225/18670 | 0.415598 | 0.586704 | 0.506104 | PLAU/THB   | 4 |
| GO:004203: gliogenesis 5/272     | 290/18670 | 0.415661 | 0.586704 | 0.506104 | IFNGR1/S1  | 5 |
| GO:190134: regulation of 7/272   | 422/18670 | 0.417876 | 0.586704 | 0.506104 | PTGS2/THI  | 7 |
| GO:000204: cell migration 2/272  | 98/18670  | 0.419156 | 0.586704 | 0.506104 | PTGS2/THI  | 2 |
| GO:000662: protein target 2/272  | 98/18670  | 0.419156 | 0.586704 | 0.506104 | UBE2D3/LI  | 2 |
| GO:003003: contractile act 2/272 | 98/18670  | 0.419156 | 0.586704 | 0.506104 | PFN2/PHA   | 2 |
| GO:004277: ATP synthesis 2/272   | 98/18670  | 0.419156 | 0.586704 | 0.506104 | DLD/COX7   | 2 |
| GO:004314: stress fiber as 2/272 | 98/18670  | 0.419156 | 0.586704 | 0.506104 | PFN2/PHA   | 2 |
| GO:000273: positive regul 1/272  | 37/18670  | 0.419311 | 0.586704 | 0.506104 | EXOSC3     | 1 |
| GO:000286: positive regul 1/272  | 37/18670  | 0.419311 | 0.586704 | 0.506104 | EXOSC3     | 1 |
| GO:000743: salivary gland 1/272  | 37/18670  | 0.419311 | 0.586704 | 0.506104 | NKX3-1     | 1 |
| GO:000913: purine nucleo 1/272   | 37/18670  | 0.419311 | 0.586704 | 0.506104 | NT5C2      | 1 |
| GO:001063: negative regul 1/272  | 37/18670  | 0.419311 | 0.586704 | 0.506104 | RGS2       | 1 |
| GO:003023: heparan sulfat 1/272  | 37/18670  | 0.419311 | 0.586704 | 0.506104 | SULF2      | 1 |
| GO:003023: hyaluronan m 1/272    | 37/18670  | 0.419311 | 0.586704 | 0.506104 | ABCC5      | 1 |
| GO:003443: response to flu 1/272 | 37/18670  | 0.419311 | 0.586704 | 0.506104 | PTGS2      | 1 |
| GO:003808: peptidyl-tyros 1/272  | 37/18670  | 0.419311 | 0.586704 | 0.506104 | BMX        | 1 |
| GO:004233: positive regul 1/272  | 37/18670  | 0.419311 | 0.586704 | 0.506104 | PTGS2      | 1 |
| GO:004324: positive regul 1/272  | 37/18670  | 0.419311 | 0.586704 | 0.506104 | F2RL1      | 1 |
| GO:004683: phospholipid c 1/272  | 37/18670  | 0.419311 | 0.586704 | 0.506104 | SYNJ2      | 1 |
| GO:005153: histone H3-K9 1/272   | 37/18670  | 0.419311 | 0.586704 | 0.506104 | ARID4A     | 1 |
| GO:005233: modulation by 1/272   | 37/18670  | 0.419311 | 0.586704 | 0.506104 | TRIM25     | 1 |
| GO:007123: cellular respor 1/272 | 37/18670  | 0.419311 | 0.586704 | 0.506104 | MMP9       | 1 |
| GO:007154: dopaminergic 1/272    | 37/18670  | 0.419311 | 0.586704 | 0.506104 | HIF1A      | 1 |
| GO:009003: positive regul 1/272  | 37/18670  | 0.419311 | 0.586704 | 0.506104 | PTGS2      | 1 |
| GO:009893: postsynaptic s 1/272  | 37/18670  | 0.419311 | 0.586704 | 0.506104 | CDK5R1     | 1 |
| GO:190353: release of seq 1/272  | 37/18670  | 0.419311 | 0.586704 | 0.506104 | CHD7       | 1 |
| GO:200024: regulation of c 1/272 | 37/18670  | 0.419311 | 0.586704 | 0.506104 | GMFG       | 1 |
| GO:200043: positive regul 1/272  | 37/18670  | 0.419311 | 0.586704 | 0.506104 | FADD       | 1 |
| GO:004364: dicarboxylic ac 2/272 | 99/18670  | 0.424182 | 0.592708 | 0.511283 | DLD/HAL    | 2 |
| GO:005183: modulation of 2/272   | 99/18670  | 0.424182 | 0.592708 | 0.511283 | EIF2AK2/EI | 2 |
| GO:007033: cellular respor 2/272 | 99/18670  | 0.424182 | 0.592708 | 0.511283 | TXN/LRRK   | 2 |
| GO:000703: vacuole organ 3/272   | 163/18670 | 0.424809 | 0.592708 | 0.511283 | AKTIP/RAB  | 3 |
| GO:003123: biomineral tis 3/272  | 163/18670 | 0.424809 | 0.592708 | 0.511283 | PTGS2/SRC  | 3 |
| GO:011014: biomineralizat 3/272  | 163/18670 | 0.424809 | 0.592708 | 0.511283 | PTGS2/SRC  | 3 |
| GO:000183: blastocyst for 1/272  | 38/18670  | 0.427788 | 0.592708 | 0.511283 | EOMES      | 1 |
| GO:000323: physiological r 1/272 | 38/18670  | 0.427788 | 0.592708 | 0.511283 | RGS2       | 1 |
| GO:000333: physiological c 1/272 | 38/18670  | 0.427788 | 0.592708 | 0.511283 | RGS2       | 1 |
| GO:000608: acetyl-CoA m 1/272    | 38/18670  | 0.427788 | 0.592708 | 0.511283 | DLD        | 1 |
| GO:000723: Wnt signaling 1/272   | 38/18670  | 0.427788 | 0.592708 | 0.511283 | TNRC6B     | 1 |
| GO:001093: positive regul 1/272  | 38/18670  | 0.427788 | 0.592708 | 0.511283 | IRS2       | 1 |
| GO:001653: histone phosp 1/272   | 38/18670  | 0.427788 | 0.592708 | 0.511283 | RPS6KA5    | 1 |

|                                                                 |           |          |          |          |           |   |
|-----------------------------------------------------------------|-----------|----------|----------|----------|-----------|---|
| GO:003231: regulation of transcription factor activity          | 38/18670  | 0.427788 | 0.592708 | 0.511283 | HIF1A     | 1 |
| GO:003261: interleukin-17 signaling                             | 38/18670  | 0.427788 | 0.592708 | 0.511283 | IL18      | 1 |
| GO:004631: negative regulation of transcription factor activity | 38/18670  | 0.427788 | 0.592708 | 0.511283 | F2RL1     | 1 |
| GO:004661: negative regulation of transcription factor activity | 38/18670  | 0.427788 | 0.592708 | 0.511283 | IL4R      | 1 |
| GO:004667: negative regulation of transcription factor activity | 38/18670  | 0.427788 | 0.592708 | 0.511283 | MAP4K4    | 1 |
| GO:004681: regulation of transcription factor activity          | 38/18670  | 0.427788 | 0.592708 | 0.511283 | TXN       | 1 |
| GO:004801: insulin-like growth factor signaling                 | 38/18670  | 0.427788 | 0.592708 | 0.511283 | NKX3-1    | 1 |
| GO:005071: positive regulation of transcription factor activity | 38/18670  | 0.427788 | 0.592708 | 0.511283 | ORM2      | 1 |
| GO:005151: positive regulation of transcription factor activity | 38/18670  | 0.427788 | 0.592708 | 0.511283 | RAB3GAP1  | 1 |
| GO:006101: cell growth in response to hypoxia                   | 38/18670  | 0.427788 | 0.592708 | 0.511283 | RGS2      | 1 |
| GO:009701: microRNA export                                      | 38/18670  | 0.427788 | 0.592708 | 0.511283 | RAE1      | 1 |
| GO:190401: positive regulation of transcription factor activity | 38/18670  | 0.427788 | 0.592708 | 0.511283 | THBS1     | 1 |
| GO:003233: positive regulation of transcription factor activity | 229/18670 | 0.428639 | 0.593018 | 0.511551 | PTGS2/UBI | 4 |
| GO:000661: fatty acid biosynthesis                              | 164/18670 | 0.428672 | 0.593018 | 0.511551 | PTGS2/HSI | 3 |
| GO:000721: phospholipase activity                               | 100/18670 | 0.429185 | 0.593018 | 0.511551 | F2RL1/LTB | 2 |
| GO:006001: excitatory postsynaptic transmission                 | 100/18670 | 0.429185 | 0.593018 | 0.511551 | RAB3GAP1  | 2 |
| GO:006081: artery development                                   | 100/18670 | 0.429185 | 0.593018 | 0.511551 | NKX3-1/CF | 2 |
| GO:009011: organelle merger                                     | 100/18670 | 0.429185 | 0.593018 | 0.511551 | STX10/TAF | 2 |
| GO:012001: positive regulation of transcription factor activity | 100/18670 | 0.429185 | 0.593018 | 0.511551 | F2RL1/HD  | 2 |
| GO:001621: macroautophagy                                       | 295/18670 | 0.429995 | 0.593717 | 0.512154 | EXOC8/CD  | 5 |
| GO:000241: adaptive immunity                                    | 361/18670 | 0.430194 | 0.593717 | 0.512154 | IL4R/EXOS | 6 |
| GO:002241: cellular process                                     | 361/18670 | 0.430194 | 0.593717 | 0.512154 | DLD/ROPN  | 6 |
| GO:003151: actin cytoskeleton organization                      | 101/18670 | 0.434164 | 0.596807 | 0.514819 | GMFG/PH   | 2 |
| GO:005081: defense response                                     | 101/18670 | 0.434164 | 0.596807 | 0.514819 | CAMP/TLR  | 2 |
| GO:190181: positive regulation of transcription factor activity | 101/18670 | 0.434164 | 0.596807 | 0.514819 | LRRN3/MA  | 2 |
| GO:000221: organ or tissue morphogenesis                        | 39/18670  | 0.436141 | 0.596807 | 0.514819 | CAMP      | 1 |
| GO:000721: activation of JAK-STAT signaling                     | 39/18670  | 0.436141 | 0.596807 | 0.514819 | MAP3K2    | 1 |
| GO:001081: regulation of cytokinesis                            | 39/18670  | 0.436141 | 0.596807 | 0.514819 | NFKBIA    | 1 |
| GO:001471: negative regulation of transcription factor activity | 39/18670  | 0.436141 | 0.596807 | 0.514819 | RGS2      | 1 |
| GO:003001: muscle filament sliding                              | 39/18670  | 0.436141 | 0.596807 | 0.514819 | TNNI2     | 1 |
| GO:003321: actin-myosin filament sliding                        | 39/18670  | 0.436141 | 0.596807 | 0.514819 | TNNI2     | 1 |
| GO:003581: vascular smooth muscle cell morphogenesis            | 39/18670  | 0.436141 | 0.596807 | 0.514819 | EPC1      | 1 |
| GO:004241: dopamine metabolism                                  | 39/18670  | 0.436141 | 0.596807 | 0.514819 | ABAT      | 1 |
| GO:004301: Golgi to plasma membrane transport                   | 39/18670  | 0.436141 | 0.596807 | 0.514819 | GOLPH3    | 1 |
| GO:004591: positive regulation of transcription factor activity | 39/18670  | 0.436141 | 0.596807 | 0.514819 | EXOSC3    | 1 |
| GO:004871: regulation of cytokinesis                            | 39/18670  | 0.436141 | 0.596807 | 0.514819 | TLR2      | 1 |
| GO:005501: acylglycerol homeostasis                             | 39/18670  | 0.436141 | 0.596807 | 0.514819 | IL18      | 1 |
| GO:007031: triglyceride homeostasis                             | 39/18670  | 0.436141 | 0.596807 | 0.514819 | IL18      | 1 |
| GO:007251: pyrimidine cofactor activity                         | 39/18670  | 0.436141 | 0.596807 | 0.514819 | UPB1      | 1 |
| GO:190211: negative regulation of transcription factor activity | 39/18670  | 0.436141 | 0.596807 | 0.514819 | LRRK2     | 1 |
| GO:190221: regulation of insulin-like growth factor signaling   | 39/18670  | 0.436141 | 0.596807 | 0.514819 | RPL26     | 1 |
| GO:190451: positive regulation of transcription factor activity | 39/18670  | 0.436141 | 0.596807 | 0.514819 | PTGS2     | 1 |
| GO:190551: regulation of transcription factor activity          | 39/18670  | 0.436141 | 0.596807 | 0.514819 | THBS1     | 1 |
| GO:200061: positive regulation of transcription factor activity | 39/18670  | 0.436141 | 0.596807 | 0.514819 | HIF1A     | 1 |
| GO:000031: response to reagent                                  | 232/18670 | 0.438372 | 0.599627 | 0.517252 | TXN/STAT1 | 4 |
| GO:000001: regulation of cytokinesis                            | 102/18670 | 0.439121 | 0.599917 | 0.517502 | GADD45A/  | 2 |
| GO:002151: cerebellum development                               | 102/18670 | 0.439121 | 0.599917 | 0.517502 | CDK5R1/AI | 2 |
| GO:003531: peptidyl-tyrosine phosphorylation                    | 102/18670 | 0.439121 | 0.599917 | 0.517502 | PTP4A2/P1 | 2 |

|                                  |           |          |          |          |           |   |
|----------------------------------|-----------|----------|----------|----------|-----------|---|
| GO:004866: reproductive s7/272   | 431/18670 | 0.439261 | 0.599917 | 0.517502 | NKX3-1/PT | 7 |
| GO:004244: hormone met 4/272     | 233/18670 | 0.441605 | 0.601791 | 0.519118 | HSD17B11  | 4 |
| GO:009730: response to al4/272   | 233/18670 | 0.441605 | 0.601791 | 0.519118 | RGS2/S100 | 4 |
| GO:003166: response to ni8/272   | 499/18670 | 0.442229 | 0.601791 | 0.519118 | PTGS2/AC9 | 8 |
| GO:003467: cellular respor3/272  | 168/18670 | 0.444028 | 0.601791 | 0.519118 | TXN/LRRK2 | 3 |
| GO:005198: regulation of c2/272  | 103/18670 | 0.444054 | 0.601791 | 0.519118 | TACC3/HEI | 2 |
| GO:007037: regulation of f5/272  | 300/18670 | 0.44426  | 0.601791 | 0.519118 | F2RL1/RAF | 5 |
| GO:000170: cell fate deter 1/272 | 40/18670  | 0.444373 | 0.601791 | 0.519118 | IFRD1     | 1 |
| GO:000194: postsynaptic r 1/272  | 40/18670  | 0.444373 | 0.601791 | 0.519118 | CDH2      | 1 |
| GO:000287: negative regul 1/272  | 40/18670  | 0.444373 | 0.601791 | 0.519118 | IL4R      | 1 |
| GO:000677: NADH metabo 1/272     | 40/18670  | 0.444373 | 0.601791 | 0.519118 | HK2       | 1 |
| GO:000907: aromatic amir 1/272   | 40/18670  | 0.444373 | 0.601791 | 0.519118 | HAL       | 1 |
| GO:000918: cyclic nucleoti 1/272 | 40/18670  | 0.444373 | 0.601791 | 0.519118 | PDE7A     | 1 |
| GO:001404: dopamine sec 1/272    | 40/18670  | 0.444373 | 0.601791 | 0.519118 | ABAT      | 1 |
| GO:001405: regulation of c 1/272 | 40/18670  | 0.444373 | 0.601791 | 0.519118 | ABAT      | 1 |
| GO:002175: cerebral corte 1/272  | 40/18670  | 0.444373 | 0.601791 | 0.519118 | CDK5R1    | 1 |
| GO:003200: positive regul 1/272  | 40/18670  | 0.444373 | 0.601791 | 0.519118 | GOLPH3    | 1 |
| GO:004207: protein refold 1/272  | 40/18670  | 0.444373 | 0.601791 | 0.519118 | B2M       | 1 |
| GO:004587: positive regul 1/272  | 40/18670  | 0.444373 | 0.601791 | 0.519118 | RGS2      | 1 |
| GO:004667: negative regul 1/272  | 40/18670  | 0.444373 | 0.601791 | 0.519118 | RGS2      | 1 |
| GO:007227: metanephric r 1/272   | 40/18670  | 0.444373 | 0.601791 | 0.519118 | STAT1     | 1 |
| GO:190106: guanosine-cor 1/272   | 40/18670  | 0.444373 | 0.601791 | 0.519118 | LRRK2     | 1 |
| GO:200000: regulation of f 1/272 | 40/18670  | 0.444373 | 0.601791 | 0.519118 | PICALM    | 1 |
| GO:005067: epithelial cell 7/272 | 434/18670 | 0.446366 | 0.604028 | 0.521048 | NKX3-1/SU | 7 |
| GO:006145: reproductive s7/272   | 434/18670 | 0.446366 | 0.604028 | 0.521048 | NKX3-1/PT | 7 |
| GO:004567: regulation of l 3/272 | 169/18670 | 0.447842 | 0.605562 | 0.522371 | PPP2R3C/I | 3 |
| GO:009765: receptor signa 3/272  | 169/18670 | 0.447842 | 0.605562 | 0.522371 | STAT1/CDH | 3 |
| GO:003015: extracellular n6/272  | 368/18670 | 0.448234 | 0.60586  | 0.522629 | SULF2/THE | 6 |
| GO:000268: negative regul 7/272  | 435/18670 | 0.448731 | 0.606151 | 0.52288  | MNDA/THI  | 7 |
| GO:000685: post-Golgi ves 2/272  | 104/18670 | 0.448963 | 0.606151 | 0.52288  | GOLPH3/E  | 2 |
| GO:001927: sensory perce 2/272   | 104/18670 | 0.448963 | 0.606151 | 0.52288  | PTGS2/MM  | 2 |
| GO:003455: cellular respor 5/272 | 302/18670 | 0.449942 | 0.607241 | 0.52382  | TXN/HIF1A | 5 |
| GO:004306: extracellular s 6/272 | 369/18670 | 0.450802 | 0.60817  | 0.524622 | SULF2/THE | 6 |
| GO:001947: triglyceride bi 1/272 | 41/18670  | 0.452485 | 0.60928  | 0.525579 | ACSL1     | 1 |
| GO:005047: positive regul 1/272  | 41/18670  | 0.452485 | 0.60928  | 0.525579 | POLR2J    | 1 |
| GO:009717: ruffle assembl 1/272  | 41/18670  | 0.452485 | 0.60928  | 0.525579 | PFN2      | 1 |
| GO:009887: modulation of 1/272   | 41/18670  | 0.452485 | 0.60928  | 0.525579 | LRRK2     | 1 |
| GO:014035: lipid export fr 1/272 | 41/18670  | 0.452485 | 0.60928  | 0.525579 | NKX3-1    | 1 |
| GO:003440: nucleobase-cc 2/272   | 105/18670 | 0.453847 | 0.610882 | 0.52696  | PDE7A/NT  | 2 |
| GO:003166: cellular respor 4/272 | 237/18670 | 0.454484 | 0.611506 | 0.527499 | PTGS2/EIF | 4 |
| GO:000320: cardiac chamk 3/272   | 171/18670 | 0.455439 | 0.612558 | 0.528406 | MDM4/HII  | 3 |
| GO:004657: regulation of f 4/272 | 238/18670 | 0.457689 | 0.615351 | 0.530816 | F2RL1/RAF | 4 |
| GO:000330: cardiac muscl 2/272   | 106/18670 | 0.458707 | 0.615828 | 0.531227 | RGS2/HDA  | 2 |
| GO:190407: regulation of c 2/272 | 106/18670 | 0.458707 | 0.615828 | 0.531227 | GADD45A/  | 2 |
| GO:000915: purine ribonu 3/272   | 172/18670 | 0.459221 | 0.615828 | 0.531227 | DLD/ACSL1 | 3 |
| GO:000665: phosphatidic c 1/272  | 42/18670  | 0.46048  | 0.615828 | 0.531227 | ACP6      | 1 |
| GO:001055: regulation of f 1/272 | 42/18670  | 0.46048  | 0.615828 | 0.531227 | GOLGA2    | 1 |
| GO:001067: negative regul 1/272  | 42/18670  | 0.46048  | 0.615828 | 0.531227 | HDAC4     | 1 |

|                              |           |          |          |          |           |   |
|------------------------------|-----------|----------|----------|----------|-----------|---|
| GO:001570 bicarbonate transp | 42/18670  | 0.46048  | 0.615828 | 0.531227 | SLC26A8   | 1 |
| GO:001603 snRNA metabo       | 42/18670  | 0.46048  | 0.615828 | 0.531227 | EXOSC3    | 1 |
| GO:001714 stem cell divis    | 42/18670  | 0.46048  | 0.615828 | 0.531227 | EVI2B     | 1 |
| GO:003300 regulation of r    | 42/18670  | 0.46048  | 0.615828 | 0.531227 | IL4R      | 1 |
| GO:009050 RNA phosphor       | 42/18670  | 0.46048  | 0.615828 | 0.531227 | EXOSC3    | 1 |
| GO:009700 dendritic cell c   | 42/18670  | 0.46048  | 0.615828 | 0.531227 | F2RL1     | 1 |
| GO:190160 glycosyl comp      | 42/18670  | 0.46048  | 0.615828 | 0.531227 | UPB1      | 1 |
| GO:200120 regulation of r    | 42/18670  | 0.46048  | 0.615828 | 0.531227 | PHACTR1   | 1 |
| GO:004350 regulation of r    | 107/18670 | 0.463541 | 0.619221 | 0.534154 | RGS2/HDA  | 2 |
| GO:005130 regulation of c    | 107/18670 | 0.463541 | 0.619221 | 0.534154 | HIF1A/LRR | 2 |
| GO:009870 ncRNA transcr      | 107/18670 | 0.463541 | 0.619221 | 0.534154 | POLR2J/PC | 2 |
| GO:004640 phosphatidyl       | 174/18670 | 0.466751 | 0.620968 | 0.535661 | SYNJ2/MPI | 3 |
| GO:200120 positive regul     | 174/18670 | 0.466751 | 0.620968 | 0.535661 | RPS6KA5/J | 3 |
| GO:000680 chloride trans     | 108/18670 | 0.46835  | 0.620968 | 0.535661 | CLCC1/SLC | 2 |
| GO:000900 fatty acid cata    | 108/18670 | 0.46835  | 0.620968 | 0.535661 | CYP4F3/IR | 2 |
| GO:005120 spindle assem      | 108/18670 | 0.46835  | 0.620968 | 0.535661 | GOLGA2/C  | 2 |
| GO:000660 prostanoid m       | 43/18670  | 0.468357 | 0.620968 | 0.535661 | PTGS2     | 1 |
| GO:000660 prostaglandin      | 43/18670  | 0.468357 | 0.620968 | 0.535661 | PTGS2     | 1 |
| GO:000860 intrinsic apopt    | 43/18670  | 0.468357 | 0.620968 | 0.535661 | HIF1A     | 1 |
| GO:001710 regulation of c    | 43/18670  | 0.468357 | 0.620968 | 0.535661 | RAB3GAP1  | 1 |
| GO:004560 positive regul     | 43/18670  | 0.468357 | 0.620968 | 0.535661 | TLR2      | 1 |
| GO:004570 negative regul     | 43/18670  | 0.468357 | 0.620968 | 0.535661 | NFKBIA    | 1 |
| GO:004570 positive regul     | 43/18670  | 0.468357 | 0.620968 | 0.535661 | TNFRSF12A | 1 |
| GO:004640 neutral lipid b    | 43/18670  | 0.468357 | 0.620968 | 0.535661 | ACSL1     | 1 |
| GO:004640 acylglycerol bi    | 43/18670  | 0.468357 | 0.620968 | 0.535661 | ACSL1     | 1 |
| GO:004640 phosphatidic a     | 43/18670  | 0.468357 | 0.620968 | 0.535661 | ACP6      | 1 |
| GO:005500 negative regul     | 43/18670  | 0.468357 | 0.620968 | 0.535661 | RGS2      | 1 |
| GO:007020 sarcoplasmic r     | 43/18670  | 0.468357 | 0.620968 | 0.535661 | CHD7      | 1 |
| GO:007230 sulfur compo       | 43/18670  | 0.468357 | 0.620968 | 0.535661 | SLC26A8   | 1 |
| GO:009900 presynapse as      | 43/18670  | 0.468357 | 0.620968 | 0.535661 | NTNG2     | 1 |
| GO:190190 positive regul     | 43/18670  | 0.468357 | 0.620968 | 0.535661 | RPS6KA5   | 1 |
| GO:000300 vascular proce     | 175/18670 | 0.470499 | 0.623575 | 0.53791  | F2RL1/PTG | 3 |
| GO:001480 striated muscl     | 109/18670 | 0.473134 | 0.626831 | 0.540719 | RGS2/HDA  | 2 |
| GO:000190 regulation of e    | 176/18670 | 0.474235 | 0.627034 | 0.540894 | THBS1/STA | 3 |
| GO:009030 positive regul     | 176/18670 | 0.474235 | 0.627034 | 0.540894 | PTGS2/UBI | 3 |
| GO:000310 endocardial c      | 44/18670  | 0.476121 | 0.627034 | 0.540894 | MDM4      | 1 |
| GO:000720 dopamine rec       | 44/18670  | 0.476121 | 0.627034 | 0.540894 | LRRK2     | 1 |
| GO:001400 oligodendrocy      | 44/18670  | 0.476121 | 0.627034 | 0.540894 | TLR2      | 1 |
| GO:001400 glutamate sec      | 44/18670  | 0.476121 | 0.627034 | 0.540894 | RAB3GAP1  | 1 |
| GO:001800 peptidyl-lysine    | 44/18670  | 0.476121 | 0.627034 | 0.540894 | ARID4A    | 1 |
| GO:003290 regulation of c    | 44/18670  | 0.476121 | 0.627034 | 0.540894 | RAP1A     | 1 |
| GO:003410 positive regul     | 44/18670  | 0.476121 | 0.627034 | 0.540894 | IL18      | 1 |
| GO:003530 positive regul     | 44/18670  | 0.476121 | 0.627034 | 0.540894 | PPP1R12A  | 1 |
| GO:004430 cell-cell adhes    | 44/18670  | 0.476121 | 0.627034 | 0.540894 | CDH2      | 1 |
| GO:006170 leukocyte adh      | 44/18670  | 0.476121 | 0.627034 | 0.540894 | GOLPH3    | 1 |
| GO:009000 negative regul     | 44/18670  | 0.476121 | 0.627034 | 0.540894 | THBS1     | 1 |
| GO:190350 protein localiz    | 44/18670  | 0.476121 | 0.627034 | 0.540894 | RAP1A     | 1 |
| GO:190350 negative regul     | 44/18670  | 0.476121 | 0.627034 | 0.540894 | LRRK2     | 1 |



|                                              |           |          |          |          |               |   |
|----------------------------------------------|-----------|----------|----------|----------|---------------|---|
| GO:200046: regulation of cell cycle          | 44/18670  | 0.476121 | 0.627034 | 0.540894 | FADD          | 1 |
| GO:001933: hexose metabolism                 | 244/18670 | 0.47678  | 0.627669 | 0.541442 | PFKFB2/HNF1B  | 4 |
| GO:000666: glycolipid metabolism             | 110/18670 | 0.477891 | 0.628898 | 0.542502 | ASAH1/MFSD2   | 2 |
| GO:000726: Ras protein signaling             | 448/18670 | 0.479289 | 0.630502 | 0.543886 | F2RL1/RAE1    | 7 |
| GO:005118: cofactor metabolic process        | 449/18670 | 0.481622 | 0.632637 | 0.545727 | LMBRD1/CDK5R1 | 7 |
| GO:000641: mRNA export                       | 111/18670 | 0.482623 | 0.632637 | 0.545727 | UPF2/RAE1     | 2 |
| GO:001485: muscle hypertrophy                | 111/18670 | 0.482623 | 0.632637 | 0.545727 | RGS2/HDA1     | 2 |
| GO:002203: metencephalic development         | 111/18670 | 0.482623 | 0.632637 | 0.545727 | CDK5R1/ATM    | 2 |
| GO:007142: mRNA-containing cell              | 111/18670 | 0.482623 | 0.632637 | 0.545727 | UPF2/RAE1     | 2 |
| GO:007263: lymphocyte maturation             | 111/18670 | 0.482623 | 0.632637 | 0.545727 | CKLF/FADD     | 2 |
| GO:009866: inorganic anion transport         | 111/18670 | 0.482623 | 0.632637 | 0.545727 | CLCC1/SLC12A1 | 2 |
| GO:190351: liposaccharide transport          | 111/18670 | 0.482623 | 0.632637 | 0.545727 | ASAH1/MFSD2   | 2 |
| GO:000197: blood vessel remodeling           | 45/18670  | 0.483771 | 0.632637 | 0.545727 | CHD7          | 1 |
| GO:000283: negative regulation of cell cycle | 45/18670  | 0.483771 | 0.632637 | 0.545727 | IL4R          | 1 |
| GO:001657: histone ubiquitination            | 45/18670  | 0.483771 | 0.632637 | 0.545727 | DTX3L         | 1 |
| GO:003233: intracellular lipid transport     | 45/18670  | 0.483771 | 0.632637 | 0.545727 | SLC25A20      | 1 |
| GO:004273: intrinsic apoptosis               | 45/18670  | 0.483771 | 0.632637 | 0.545727 | RPL26         | 1 |
| GO:004558: negative regulation of cell cycle | 45/18670  | 0.483771 | 0.632637 | 0.545727 | IL4R          | 1 |
| GO:004853: thymus development                | 45/18670  | 0.483771 | 0.632637 | 0.545727 | FADD          | 1 |
| GO:009023: negative regulation of cell cycle | 45/18670  | 0.483771 | 0.632637 | 0.545727 | MAP4K4        | 1 |
| GO:000667: protein export                    | 179/18670 | 0.485371 | 0.634027 | 0.546926 | TXN/UPF2      | 3 |
| GO:000833: regulation of cell cycle          | 179/18670 | 0.485371 | 0.634027 | 0.546926 | IFRD1/TNFR1   | 3 |
| GO:004873: tissue remodeling                 | 179/18670 | 0.485371 | 0.634027 | 0.546926 | HIF1A/IL18    | 3 |
| GO:004576: regulation of cell cycle          | 383/18670 | 0.486444 | 0.634943 | 0.547716 | PTGS2/THBS1   | 6 |
| GO:000203: columnar/cuboidal epithelium      | 112/18670 | 0.487328 | 0.634943 | 0.547716 | HIF1A/CDH1    | 2 |
| GO:000323: cardiac septum                    | 112/18670 | 0.487328 | 0.634943 | 0.547716 | MDM4/CHD7     | 2 |
| GO:003111: microtubule polymerization        | 112/18670 | 0.487328 | 0.634943 | 0.547716 | CDK5R1/GAP43  | 2 |
| GO:004233: molting cycle                     | 112/18670 | 0.487328 | 0.634943 | 0.547716 | PTGS2/TGIF1   | 2 |
| GO:004263: hair cycle                        | 112/18670 | 0.487328 | 0.634943 | 0.547716 | PTGS2/TGIF1   | 2 |
| GO:004323: response to alcohol               | 112/18670 | 0.487328 | 0.634943 | 0.547716 | FADD/ABA      | 2 |
| GO:003443: ncRNA processing                  | 384/18670 | 0.488964 | 0.636384 | 0.548959 | RPS28/RPS27   | 6 |
| GO:004353: blood vessel remodeling           | 180/18670 | 0.489058 | 0.636384 | 0.548959 | PTGS2/THBS1   | 3 |
| GO:004354: protein acylation                 | 248/18670 | 0.489366 | 0.636384 | 0.548959 | RPS6KA5/ILK3  | 4 |
| GO:000151: neurotransmission                 | 46/18670  | 0.49131  | 0.636384 | 0.548959 | RGS2          | 1 |
| GO:000263: regulation of cell cycle          | 46/18670  | 0.49131  | 0.636384 | 0.548959 | PTGS2         | 1 |
| GO:000715: heterophilic chemotaxis           | 46/18670  | 0.49131  | 0.636384 | 0.548959 | CDH2          | 1 |
| GO:001403: response to arachidonic acid      | 46/18670  | 0.49131  | 0.636384 | 0.548959 | RGS2          | 1 |
| GO:001973: antibacterial humoral immunity    | 46/18670  | 0.49131  | 0.636384 | 0.548959 | CAMP          | 1 |
| GO:003363: regulation of cell cycle          | 46/18670  | 0.49131  | 0.636384 | 0.548959 | PLAU          | 1 |
| GO:004323: apoptotic cell death              | 46/18670  | 0.49131  | 0.636384 | 0.548959 | THBS1         | 1 |
| GO:004573: negative regulation of cell cycle | 46/18670  | 0.49131  | 0.636384 | 0.548959 | ABAT          | 1 |
| GO:005073: regulation of cell cycle          | 46/18670  | 0.49131  | 0.636384 | 0.548959 | ORM2          | 1 |
| GO:007133: cellular response                 | 46/18670  | 0.49131  | 0.636384 | 0.548959 | STAT1         | 1 |
| GO:007163: regulation of cell cycle          | 46/18670  | 0.49131  | 0.636384 | 0.548959 | THBS1         | 1 |
| GO:009913: presynapse or synapse formation   | 46/18670  | 0.49131  | 0.636384 | 0.548959 | NTNG2         | 1 |
| GO:190358: regulation of cell cycle          | 46/18670  | 0.49131  | 0.636384 | 0.548959 | THBS1         | 1 |
| GO:006093: regulation of cell cycle          | 113/18670 | 0.492006 | 0.636838 | 0.549351 | POLR2J/RAE1   | 2 |
| GO:007033: ERK1 and ERK5 signaling           | 317/18670 | 0.49202  | 0.636838 | 0.549351 | F2RL1/RAF1    | 5 |

|                                           |           |          |          |          |           |   |
|-------------------------------------------|-----------|----------|----------|----------|-----------|---|
| GO:005133: meiotic cell cycle 4/272       | 249/18670 | 0.492493 | 0.636984 | 0.549477 | RBM7/GOI  | 4 |
| GO:007156: cellular response 4/272        | 249/18670 | 0.492493 | 0.636984 | 0.549477 | USP15/THI | 4 |
| GO:000151: cilium or flagellum 2/272      | 114/18670 | 0.496657 | 0.641081 | 0.553011 | ROPN1L/SI | 2 |
| GO:006028: cilium-dependent 2/272         | 114/18670 | 0.496657 | 0.641081 | 0.553011 | ROPN1L/SI | 2 |
| GO:199077: protein localization 5/272     | 319/18670 | 0.497546 | 0.641081 | 0.553011 | GOLPH3/K  | 5 |
| GO:000223: somatic recombination 1/272    | 47/18670  | 0.498739 | 0.641081 | 0.553011 | EXOSC3    | 1 |
| GO:000224: somatic diversification 1/272  | 47/18670  | 0.498739 | 0.641081 | 0.553011 | EXOSC3    | 1 |
| GO:000823: bile acid metabolism 1/272     | 47/18670  | 0.498739 | 0.641081 | 0.553011 | OSBPL9    | 1 |
| GO:001497: positive regulation 1/272      | 47/18670  | 0.498739 | 0.641081 | 0.553011 | HDAC4     | 1 |
| GO:003057: collagen catabolism 1/272      | 47/18670  | 0.498739 | 0.641081 | 0.553011 | MMP9      | 1 |
| GO:004251: neuron maturation 1/272        | 47/18670  | 0.498739 | 0.641081 | 0.553011 | LRRK2     | 1 |
| GO:004333: mast cell degranulation 1/272  | 47/18670  | 0.498739 | 0.641081 | 0.553011 | IL4R      | 1 |
| GO:004511: isotype switching 1/272        | 47/18670  | 0.498739 | 0.641081 | 0.553011 | EXOSC3    | 1 |
| GO:004744: vesicle transport 1/272        | 47/18670  | 0.498739 | 0.641081 | 0.553011 | KIF1B     | 1 |
| GO:004883: genitalia development 1/272    | 47/18670  | 0.498739 | 0.641081 | 0.553011 | CHD7      | 1 |
| GO:006098: endocrine hormone 1/272        | 47/18670  | 0.498739 | 0.641081 | 0.553011 | NKX3-1    | 1 |
| GO:006138: trabecular morphology 1/272    | 47/18670  | 0.498739 | 0.641081 | 0.553011 | CHD7      | 1 |
| GO:006223: protein localization 1/272     | 47/18670  | 0.498739 | 0.641081 | 0.553011 | RAP1A     | 1 |
| GO:200123: regulation of cell cycle 1/272 | 47/18670  | 0.498739 | 0.641081 | 0.553011 | IFI6      | 1 |
| GO:001099: cellular component 2/272       | 115/18670 | 0.501281 | 0.643881 | 0.555426 | TLR2/LMO  | 2 |
| GO:190437: regulation of cell cycle 2/272 | 115/18670 | 0.501281 | 0.643881 | 0.555426 | RAP1A/PIC | 2 |
| GO:004205: T cell proliferation 3/272     | 184/18670 | 0.503675 | 0.645104 | 0.556482 | TNFSF13B/ | 3 |
| GO:004343: negative regulation 3/272      | 184/18670 | 0.503675 | 0.645104 | 0.556482 | F2RL1/RAF | 3 |
| GO:003133: negative regulation 4/272      | 253/18670 | 0.504922 | 0.645104 | 0.556482 | TOB1/GOL  | 4 |
| GO:000633: DNA modification 2/272         | 116/18670 | 0.505878 | 0.645104 | 0.556482 | EXOSC3/TI | 2 |
| GO:000756: cell aging 2/272               | 116/18670 | 0.505878 | 0.645104 | 0.556482 | MME/B2M   | 2 |
| GO:190018: regulation of cell cycle 2/272 | 116/18670 | 0.505878 | 0.645104 | 0.556482 | PTGS2/DT  | 2 |
| GO:000206: chondrocyte cell 1/272         | 48/18670  | 0.506061 | 0.645104 | 0.556482 | SULF2     | 1 |
| GO:000227: mast cell activation 1/272     | 48/18670  | 0.506061 | 0.645104 | 0.556482 | IL4R      | 1 |
| GO:000757: neuromuscular 1/272            | 48/18670  | 0.506061 | 0.645104 | 0.556482 | LRRK2     | 1 |
| GO:000808: anterograde axon 1/272         | 48/18670  | 0.506061 | 0.645104 | 0.556482 | KIF1B     | 1 |
| GO:001633: calcium-dependent 1/272        | 48/18670  | 0.506061 | 0.645104 | 0.556482 | CDH2      | 1 |
| GO:003088: prostate gland 1/272           | 48/18670  | 0.506061 | 0.645104 | 0.556482 | NKX3-1    | 1 |
| GO:003089: cortical cytoskeleton 1/272    | 48/18670  | 0.506061 | 0.645104 | 0.556482 | PPP2R3C   | 1 |
| GO:003527: exocrine system 1/272          | 48/18670  | 0.506061 | 0.645104 | 0.556482 | NKX3-1    | 1 |
| GO:004367: ncRNA 3'-end 1/272             | 48/18670  | 0.506061 | 0.645104 | 0.556482 | EXOSC3    | 1 |
| GO:004397: regulation of cell cycle 1/272 | 48/18670  | 0.506061 | 0.645104 | 0.556482 | RGS2      | 1 |
| GO:004597: negative regulation 1/272      | 48/18670  | 0.506061 | 0.645104 | 0.556482 | HDAC4     | 1 |
| GO:005507: ventricular cavity 1/272       | 48/18670  | 0.506061 | 0.645104 | 0.556482 | CHD7      | 1 |
| GO:006167: histone H3-K9 1/272            | 48/18670  | 0.506061 | 0.645104 | 0.556482 | ARID4A    | 1 |
| GO:007263: interleukin-6 signaling 1/272  | 48/18670  | 0.506061 | 0.645104 | 0.556482 | F2RL1     | 1 |
| GO:200008: negative regulation 1/272      | 48/18670  | 0.506061 | 0.645104 | 0.556482 | RPL23     | 1 |
| GO:000733: gastrulation 3/272             | 185/18670 | 0.507296 | 0.645749 | 0.557038 | DLD/EOMF  | 3 |
| GO:000926: ribonucleotide 3/272           | 185/18670 | 0.507296 | 0.645749 | 0.557038 | DLD/ACSL1 | 3 |
| GO:004527: cell-cell junction 3/272       | 185/18670 | 0.507296 | 0.645749 | 0.557038 | F2RL1/CDH | 3 |
| GO:190227: regulation of cell cycle 3/272 | 185/18670 | 0.507296 | 0.645749 | 0.557038 | RPS6KA5/J | 3 |
| GO:000276: regulation of cell cycle 2/272 | 117/18670 | 0.510448 | 0.648595 | 0.559492 | FADD/EVI2 | 2 |
| GO:002299: respiratory electron 2/272     | 117/18670 | 0.510448 | 0.648595 | 0.559492 | DLD/COX7  | 2 |

|                             |          |           |          |          |          |           |   |
|-----------------------------|----------|-----------|----------|----------|----------|-----------|---|
| GO:003133: positive regulat | 2/272    | 117/1867C | 0.510448 | 0.648595 | 0.559492 | GOLGA2/L  | 2 |
| GO:006014: regulation of    | 2/272    | 117/1867C | 0.510448 | 0.648595 | 0.559492 | POLR2J/RA | 2 |
| GO:006096: regulation of    | 2/272    | 117/1867C | 0.510448 | 0.648595 | 0.559492 | POLR2J/RA | 2 |
| GO:007056: regulation of    | 3/272    | 186/1867C | 0.510904 | 0.648931 | 0.559782 | TACC3/CDI | 3 |
| GO:007155: response to      | tr 4/272 | 255/1867C | 0.511086 | 0.648931 | 0.559782 | USP15/THI | 4 |
| GO:190383: positive regulat | 5/272    | 324/1867C | 0.511262 | 0.648931 | 0.559782 | PTGS2/UBI | 5 |
| GO:001063: negative regulat | 6/272    | 393/1867C | 0.51146  | 0.64895  | 0.559799 | PFN2/GMF  | 6 |
| GO:000244: mast cell med    | 1/272    | 49/18670  | 0.513275 | 0.649855 | 0.56058  | IL4R      | 1 |
| GO:000834: glial cell migra | 1/272    | 49/18670  | 0.513275 | 0.649855 | 0.56058  | CDK5R1    | 1 |
| GO:001077: regulation of    | 1/272    | 49/18670  | 0.513275 | 0.649855 | 0.56058  | RAP1A     | 1 |
| GO:002187: forebrain neu    | 1/272    | 49/18670  | 0.513275 | 0.649855 | 0.56058  | B2M       | 1 |
| GO:004854: digestive tract  | 1/272    | 49/18670  | 0.513275 | 0.649855 | 0.56058  | HIF1A     | 1 |
| GO:190303: regulation of    | 1/272    | 49/18670  | 0.513275 | 0.649855 | 0.56058  | GOLGA2    | 1 |
| GO:009911: microtubule-b    | 3/272    | 187/1867C | 0.514497 | 0.651169 | 0.561713 | ROPN1L/KI | 3 |
| GO:000697: phagocytosis,    | 2/272    | 118/1867C | 0.514989 | 0.651559 | 0.56205  | F2RL1/THE | 2 |
| GO:000657: cellular modifi  | 3/272    | 188/1867C | 0.518076 | 0.655231 | 0.565217 | VNN2/MBI  | 3 |
| GO:000293: response to      | is 1/272 | 50/18670  | 0.520385 | 0.656041 | 0.565916 | HK2       | 1 |
| GO:000916: ribonucleosid    | 1/272    | 50/18670  | 0.520385 | 0.656041 | 0.565916 | NT5C2     | 1 |
| GO:003111: regulation of    | 1/272    | 50/18670  | 0.520385 | 0.656041 | 0.565916 | CDK5R1    | 1 |
| GO:003287: negative regulat | 1/272    | 50/18670  | 0.520385 | 0.656041 | 0.565916 | F2RL1     | 1 |
| GO:003465: nucleobase-cc    | 1/272    | 50/18670  | 0.520385 | 0.656041 | 0.565916 | UPB1      | 1 |
| GO:007036: negative regulat | 1/272    | 50/18670  | 0.520385 | 0.656041 | 0.565916 | F2RL1     | 1 |
| GO:007053: protein K63-lin  | 1/272    | 50/18670  | 0.520385 | 0.656041 | 0.565916 | TRIM56    | 1 |
| GO:007074: response to      | in 1/272 | 50/18670  | 0.520385 | 0.656041 | 0.565916 | STAT1     | 1 |
| GO:200077: regulation of    | 1/272    | 50/18670  | 0.520385 | 0.656041 | 0.565916 | RGS2      | 1 |
| GO:001826: peptidyl-lysin   | 6/272    | 397/1867C | 0.521342 | 0.657013 | 0.566755 | RPS6KA5/E | 6 |
| GO:000265: negative regulat | 2/272    | 120/1867C | 0.523989 | 0.659645 | 0.569025 | IL4R/PPM1 | 2 |
| GO:001707: regulation of    | t 2/272  | 120/1867C | 0.523989 | 0.659645 | 0.569025 | THBS1/PBI | 2 |
| GO:002267: gland morpho     | 2/272    | 120/1867C | 0.523989 | 0.659645 | 0.569025 | NKX3-1/SL | 2 |
| GO:007265: protein localiz  | 4/272    | 260/1867C | 0.526343 | 0.659938 | 0.569277 | GOLPH3/R  | 4 |
| GO:000195: positive regulat | 1/272    | 51/18670  | 0.527391 | 0.659938 | 0.569277 | MAP4K4    | 1 |
| GO:000277: regulation of    | 1/272    | 51/18670  | 0.527391 | 0.659938 | 0.569277 | EXOSC3    | 1 |
| GO:000288: regulation of    | i 1/272  | 51/18670  | 0.527391 | 0.659938 | 0.569277 | EXOSC3    | 1 |
| GO:000906: aspartate fam    | 1/272    | 51/18670  | 0.527391 | 0.659938 | 0.569277 | DLD       | 1 |
| GO:001936: arachidonic ac   | 1/272    | 51/18670  | 0.527391 | 0.659938 | 0.569277 | PTGS2     | 1 |
| GO:002154: cranial nerve    | 1/272    | 51/18670  | 0.527391 | 0.659938 | 0.569277 | CHD7      | 1 |
| GO:003007: regulation of    | 1/272    | 51/18670  | 0.527391 | 0.659938 | 0.569277 | HECW2     | 1 |
| GO:003206: negative regulat | 1/272    | 51/18670  | 0.527391 | 0.659938 | 0.569277 | HIF1A     | 1 |
| GO:004555: negative regulat | 1/272    | 51/18670  | 0.527391 | 0.659938 | 0.569277 | JDP2      | 1 |
| GO:004574: negative regulat | 1/272    | 51/18670  | 0.527391 | 0.659938 | 0.569277 | RGS2      | 1 |
| GO:004814: positive regulat | 1/272    | 51/18670  | 0.527391 | 0.659938 | 0.569277 | S100A6    | 1 |
| GO:004826: positive regulat | 1/272    | 51/18670  | 0.527391 | 0.659938 | 0.569277 | B2M       | 1 |
| GO:005095: regulation of    | 1/272    | 51/18670  | 0.527391 | 0.659938 | 0.569277 | HIF1A     | 1 |
| GO:005145: positive regulat | 1/272    | 51/18670  | 0.527391 | 0.659938 | 0.569277 | PFN2      | 1 |
| GO:009736: response to      | bi 1/272 | 51/18670  | 0.527391 | 0.659938 | 0.569277 | RGS2      | 1 |
| GO:200125: negative regulat | 1/272    | 51/18670  | 0.527391 | 0.659938 | 0.569277 | MMP9      | 1 |
| GO:000176: formation of     | 2/272    | 121/1867C | 0.528447 | 0.660445 | 0.569715 | EOMES/MI  | 2 |
| GO:001087: positive regulat | 2/272    | 121/1867C | 0.528447 | 0.660445 | 0.569715 | HSD17B12  | 2 |

|                                       |           |          |          |          |                |   |
|---------------------------------------|-----------|----------|----------|----------|----------------|---|
| GO:00467: viral entry into cell       | 121/18670 | 0.528447 | 0.660445 | 0.569715 | TRIM25/ATM     | 2 |
| GO:00019: endothelial cell            | 191/18670 | 0.528729 | 0.660445 | 0.569715 | THBS1/STAF     | 3 |
| GO:00425: response to stress          | 191/18670 | 0.528729 | 0.660445 | 0.569715 | EIF2AK2/EIF2S1 | 3 |
| GO:00516: establishment of cell       | 401/18670 | 0.531145 | 0.663186 | 0.572079 | IL4R/GOLG      | 6 |
| GO:00061: purine nucleoside           | 192/18670 | 0.532251 | 0.663186 | 0.572079 | DLD/ACSL1      | 3 |
| GO:00442: sulfur compound             | 192/18670 | 0.532251 | 0.663186 | 0.572079 | DLD/ACSL1      | 3 |
| GO:00507: positive regulation of cell | 192/18670 | 0.532251 | 0.663186 | 0.572079 | PAK2/UNC       | 3 |
| GO:19038: regulation of cell          | 122/18670 | 0.532876 | 0.663186 | 0.572079 | THBS1/PBI      | 2 |
| GO:00031: heart valve morphogenesis   | 52/18670  | 0.534295 | 0.663186 | 0.572079 | MDM4           | 1 |
| GO:00158: dopamine transporter        | 52/18670  | 0.534295 | 0.663186 | 0.572079 | ABAT           | 1 |
| GO:00164: somatic recombination       | 52/18670  | 0.534295 | 0.663186 | 0.572079 | EXOSC3         | 1 |
| GO:00305: negative regulation of cell | 52/18670  | 0.534295 | 0.663186 | 0.572079 | TOB1           | 1 |
| GO:00315: ruffle organization         | 52/18670  | 0.534295 | 0.663186 | 0.572079 | PFN2           | 1 |
| GO:00351: social behavior             | 52/18670  | 0.534295 | 0.663186 | 0.572079 | CHD8           | 1 |
| GO:00465: negative regulation of cell | 52/18670  | 0.534295 | 0.663186 | 0.572079 | RAPGEF1        | 1 |
| GO:00721: mesenchyme                  | 52/18670  | 0.534295 | 0.663186 | 0.572079 | MDM4           | 1 |
| GO:00995: vesicle cytoskeleton        | 52/18670  | 0.534295 | 0.663186 | 0.572079 | KIF1B          | 1 |
| GO:19023: negative regulation of cell | 52/18670  | 0.534295 | 0.663186 | 0.572079 | TOB1           | 1 |
| GO:20001: positive regulation of cell | 52/18670  | 0.534295 | 0.663186 | 0.572079 | HIF1A          | 1 |
| GO:20006: regulation of cell          | 52/18670  | 0.534295 | 0.663186 | 0.572079 | HECW2          | 1 |
| GO:20007: regulation of cell          | 52/18670  | 0.534295 | 0.663186 | 0.572079 | B2M            | 1 |
| GO:00023: immunoglobulin              | 193/18670 | 0.535758 | 0.664535 | 0.573243 | IL4R/EXOS      | 3 |
| GO:00072: Notch signaling             | 193/18670 | 0.535758 | 0.664535 | 0.573243 | STAT1/NFK      | 3 |
| GO:00453: cellular respiration        | 194/18670 | 0.53925  | 0.666704 | 0.575114 | DLD/HIF1A      | 3 |
| GO:00511: nuclear export              | 194/18670 | 0.53925  | 0.666704 | 0.575114 | TXN/UPF2,      | 3 |
| GO:00020: blood vessel                | 53/18670  | 0.541099 | 0.666704 | 0.575114 | THBS1          | 1 |
| GO:00063: mRNA splicing               | 53/18670  | 0.541099 | 0.666704 | 0.575114 | PSIP1          | 1 |
| GO:00100: response to zinc            | 53/18670  | 0.541099 | 0.666704 | 0.575114 | S100A8         | 1 |
| GO:00108: negative regulation of cell | 53/18670  | 0.541099 | 0.666704 | 0.575114 | LRRK2          | 1 |
| GO:00329: collagen biosynthesis       | 53/18670  | 0.541099 | 0.666704 | 0.575114 | RAP1A          | 1 |
| GO:00350: sperm-egg recombination     | 53/18670  | 0.541099 | 0.666704 | 0.575114 | FOLR3          | 1 |
| GO:00350: regulation of cell          | 53/18670  | 0.541099 | 0.666704 | 0.575114 | RPS6KA5        | 1 |
| GO:00362: interstrand crosslink       | 53/18670  | 0.541099 | 0.666704 | 0.575114 | MCM8           | 1 |
| GO:00456: regulation of cell          | 53/18670  | 0.541099 | 0.666704 | 0.575114 | IL18           | 1 |
| GO:00507: regulation of cell          | 53/18670  | 0.541099 | 0.666704 | 0.575114 | ORM2           | 1 |
| GO:00507: negative regulation of cell | 53/18670  | 0.541099 | 0.666704 | 0.575114 | SH3BP5L        | 1 |
| GO:00605: neuroepithelium             | 53/18670  | 0.541099 | 0.666704 | 0.575114 | CDH2           | 1 |
| GO:00985: cellular response           | 53/18670  | 0.541099 | 0.666704 | 0.575114 | IFI6           | 1 |
| GO:19020: regulation of cell          | 53/18670  | 0.541099 | 0.666704 | 0.575114 | HECW2          | 1 |
| GO:00346: ncRNA metabolism            | 475/18670 | 0.541123 | 0.666704 | 0.575114 | RPS28/RPS      | 7 |
| GO:00000: transition metal            | 124/18670 | 0.54165  | 0.666704 | 0.575114 | LMTK2/B2       | 2 |
| GO:00140: regulation of cell          | 124/18670 | 0.54165  | 0.666704 | 0.575114 | TLR2/CDH       | 2 |
| GO:00197: polyol metabolism           | 124/18670 | 0.54165  | 0.666704 | 0.575114 | ASAH1/SYI      | 2 |
| GO:00467: acid secretion              | 124/18670 | 0.54165  | 0.666704 | 0.575114 | RAB3GAP1       | 2 |
| GO:00482: organelle fusion            | 124/18670 | 0.54165  | 0.666704 | 0.575114 | STX10/TAF      | 2 |
| GO:00303: embryonic limb              | 125/18670 | 0.545994 | 0.671477 | 0.579231 | PBX2/CHD       | 2 |
| GO:00351: embryonic apoptosis         | 125/18670 | 0.545994 | 0.671477 | 0.579231 | PBX2/CHD       | 2 |
| GO:00065: catecholamine               | 54/18670  | 0.547804 | 0.671477 | 0.579231 | ABAT           | 1 |

|                                  |           |          |          |          |           |   |
|----------------------------------|-----------|----------|----------|----------|-----------|---|
| GO:00097: catechol-cont:1/272    | 54/18670  | 0.547804 | 0.671477 | 0.579231 | ABAT      | 1 |
| GO:00326: regulation of i 1/272  | 54/18670  | 0.547804 | 0.671477 | 0.579231 | CLEC7A    | 1 |
| GO:00433: negative regul1/272    | 54/18670  | 0.547804 | 0.671477 | 0.579231 | NFKBIA    | 1 |
| GO:00461: alcohol catabo 1/272   | 54/18670  | 0.547804 | 0.671477 | 0.579231 | SYNJ2     | 1 |
| GO:00509: regulation of l 1/272  | 54/18670  | 0.547804 | 0.671477 | 0.579231 | IRS2      | 1 |
| GO:00513: positive regul: 1/272  | 54/18670  | 0.547804 | 0.671477 | 0.579231 | HIF1A     | 1 |
| GO:00517: (intraspecies ir 1/272 | 54/18670  | 0.547804 | 0.671477 | 0.579231 | CHD8      | 1 |
| GO:00702: (protein trimer 1/272  | 54/18670  | 0.547804 | 0.671477 | 0.579231 | ALOX5AP   | 1 |
| GO:19046: response to a 1/272    | 54/18670  | 0.547804 | 0.671477 | 0.579231 | MMP9      | 1 |
| GO:00316: cellular respor 4/272  | 268/18670 | 0.550266 | 0.673848 | 0.581276 | PTGS2/EIF | 4 |
| GO:00456: regulation of c 2/272  | 126/18670 | 0.550309 | 0.673848 | 0.581276 | TOB1/HDA  | 2 |
| GO:00901: (negative regul 2/272  | 126/18670 | 0.550309 | 0.673848 | 0.581276 | TOB1/PBLI | 2 |
| GO:00076: locomotory be 3/272    | 198/18670 | 0.553068 | 0.676056 | 0.583181 | LRRK2/CHI | 3 |
| GO:00605: respiratory sy: 3/272  | 198/18670 | 0.553068 | 0.676056 | 0.583181 | MME/CHD   | 3 |
| GO:00032: ventricular car 1/272  | 55/18670  | 0.554411 | 0.676056 | 0.583181 | CHD7      | 1 |
| GO:00061: mitochondrial 1/272    | 55/18670  | 0.554411 | 0.676056 | 0.583181 | DLD       | 1 |
| GO:00063: transcription t 1/272  | 55/18670  | 0.554411 | 0.676056 | 0.583181 | CHD8      | 1 |
| GO:00327: positive regul: 1/272  | 55/18670  | 0.554411 | 0.676056 | 0.583181 | PFN2      | 1 |
| GO:00423: (regulation of f 1/272 | 55/18670  | 0.554411 | 0.676056 | 0.583181 | PTGS2     | 1 |
| GO:00423: (regulation of f 1/272 | 55/18670  | 0.554411 | 0.676056 | 0.583181 | PTGS2     | 1 |
| GO:00431: receptor clust 1/272   | 55/18670  | 0.554411 | 0.676056 | 0.583181 | CDH2      | 1 |
| GO:00439: cellular compo 1/272   | 55/18670  | 0.554411 | 0.676056 | 0.583181 | F2RL1     | 1 |
| GO:00456: negative regul1/272    | 55/18670  | 0.554411 | 0.676056 | 0.583181 | IL4R      | 1 |
| GO:00714: ribonucleopro 2/272    | 127/18670 | 0.554595 | 0.676056 | 0.583181 | UPF2/RAE  | 2 |
| GO:00990: plasma memb 2/272      | 127/18670 | 0.554595 | 0.676056 | 0.583181 | F2RL1/THE | 2 |
| GO:00310: actomyosin st 3/272    | 199/18670 | 0.556484 | 0.677892 | 0.584765 | PFN2/PHA  | 3 |
| GO:00508: (negative regul 3/272  | 199/18670 | 0.556484 | 0.677892 | 0.584765 | MNDA/IL4  | 3 |
| GO:00711: ribonucleopro 2/272    | 128/18670 | 0.558853 | 0.680344 | 0.58688  | UPF2/RAE  | 2 |
| GO:00347: (regulation of i 7/272 | 483/18670 | 0.558881 | 0.680344 | 0.58688  | CACNA1E/  | 7 |
| GO:00330: regulation of c 5/272  | 342/18670 | 0.559297 | 0.680615 | 0.587114 | RPS6KA5/1 | 5 |
| GO:00023: immunoglobu 1/272      | 56/18670  | 0.560922 | 0.681188 | 0.587608 | EXOSC3    | 1 |
| GO:00103: response to g: 1/272   | 56/18670  | 0.560922 | 0.681188 | 0.587608 | RPL26     | 1 |
| GO:00452: mRNA cis splic 1/272   | 56/18670  | 0.560922 | 0.681188 | 0.587608 | PSIP1     | 1 |
| GO:00515: (histone H3-K4 1/272   | 56/18670  | 0.560922 | 0.681188 | 0.587608 | ARID4A    | 1 |
| GO:00606: regulation of r 1/272  | 56/18670  | 0.560922 | 0.681188 | 0.587608 | LRRK2     | 1 |
| GO:00903: (mitotic spindl 1/272  | 56/18670  | 0.560922 | 0.681188 | 0.587608 | GOLGA2    | 1 |
| GO:00328: (response to in 4/272  | 272/18670 | 0.56199  | 0.682251 | 0.588525 | STAT1/IRS | 4 |
| GO:00032: (cardiac chamk 2/272   | 129/18670 | 0.563081 | 0.682873 | 0.589062 | HIF1A/CHI | 2 |
| GO:00347: cellular hormo 2/272   | 129/18670 | 0.563081 | 0.682873 | 0.589062 | HSD17B11  | 2 |
| GO:00508: B cell receptor 2/272  | 129/18670 | 0.563081 | 0.682873 | 0.589062 | MNDA/BV   | 2 |
| GO:00435: (muscle adapt: 2/272   | 130/18670 | 0.567281 | 0.68639  | 0.592095 | RGS2/HDA  | 2 |
| GO:00017: neural crest c: 1/272  | 57/18670  | 0.567338 | 0.68639  | 0.592095 | HIF1A     | 1 |
| GO:00020: (columnar/cub 1/272    | 57/18670  | 0.567338 | 0.68639  | 0.592095 | HIF1A     | 1 |
| GO:00148: striated muscl 1/272   | 57/18670  | 0.567338 | 0.68639  | 0.592095 | HDAC4     | 1 |
| GO:00333: cholesterol efi 1/272  | 57/18670  | 0.567338 | 0.68639  | 0.592095 | NFKBIA    | 1 |
| GO:00480: (platelet-deriv: 1/272 | 57/18670  | 0.567338 | 0.68639  | 0.592095 | RAPGEF1   | 1 |
| GO:00757: intracellular tr 1/272 | 57/18670  | 0.567338 | 0.68639  | 0.592095 | RAE1      | 1 |
| GO:00435: endothelial ce 4/272   | 274/18670 | 0.567789 | 0.686701 | 0.592364 | PTGS2/THI | 4 |

|                             |       |           |          |          |          |           |   |
|-----------------------------|-------|-----------|----------|----------|----------|-----------|---|
| GO:00486: regulation of c   | 5/272 | 347/18670 | 0.572223 | 0.691827 | 0.596785 | IFRD1/TNF | 5 |
| GO:19016: alpha-amino a     | 3/272 | 204/18670 | 0.573329 | 0.691911 | 0.596858 | DLD/HAL/F | 3 |
| GO:00192: regulation of \   | 1/272 | 58/18670  | 0.573661 | 0.691911 | 0.596858 | PTGS2     | 1 |
| GO:00353: positive regul    | 1/272 | 58/18670  | 0.573661 | 0.691911 | 0.596858 | PPP1R12A  | 1 |
| GO:00510: negative regul    | 1/272 | 58/18670  | 0.573661 | 0.691911 | 0.596858 | RAPGEF1   | 1 |
| GO:00619: establishment     | 1/272 | 58/18670  | 0.573661 | 0.691911 | 0.596858 | GOLPH3    | 1 |
| GO:19037: positive regul    | 1/272 | 58/18670  | 0.573661 | 0.691911 | 0.596858 | UBE2D3    | 1 |
| GO:19045: regulation of f   | 1/272 | 58/18670  | 0.573661 | 0.691911 | 0.596858 | PTGS2     | 1 |
| GO:00421: negative regul    | 2/272 | 132/18670 | 0.575592 | 0.693768 | 0.59846  | MDM4/RP   | 2 |
| GO:00455: regulation of f   | 2/272 | 132/18670 | 0.575592 | 0.693768 | 0.59846  | PTGS2/JDF | 2 |
| GO:00725: purine-contair    | 3/272 | 205/18670 | 0.57665  | 0.694806 | 0.599356 | DLD/ACSL1 | 3 |
| GO:00095: detection of e    | 2/272 | 133/18670 | 0.579704 | 0.696341 | 0.60068  | RGR/UNC1  | 2 |
| GO:00218: forebrain gen     | 1/272 | 59/18670  | 0.579891 | 0.696341 | 0.60068  | B2M       | 1 |
| GO:00305: androgen rece     | 1/272 | 59/18670  | 0.579891 | 0.696341 | 0.60068  | NKX3-1    | 1 |
| GO:00311: (neuron projec    | 1/272 | 59/18670  | 0.579891 | 0.696341 | 0.60068  | MAP4K4    | 1 |
| GO:00458: negative regul    | 1/272 | 59/18670  | 0.579891 | 0.696341 | 0.60068  | RGS2      | 1 |
| GO:00705: platelet aggre    | 1/272 | 59/18670  | 0.579891 | 0.696341 | 0.60068  | ABAT      | 1 |
| GO:19023: negative regul    | 1/272 | 59/18670  | 0.579891 | 0.696341 | 0.60068  | TOB1      | 1 |
| GO:20002: negative regul    | 1/272 | 59/18670  | 0.579891 | 0.696341 | 0.60068  | NKX3-1    | 1 |
| GO:20003: regulation of e   | 1/272 | 59/18670  | 0.579891 | 0.696341 | 0.60068  | THBS1     | 1 |
| GO:20007: regulation of f   | 1/272 | 59/18670  | 0.579891 | 0.696341 | 0.60068  | RPS6KA5   | 1 |
| GO:00067: (vitamin metak    | 2/272 | 134/18670 | 0.583787 | 0.70007  | 0.603896 | LMBRD1/V  | 2 |
| GO:00070: (mitochondrial    | 2/272 | 134/18670 | 0.583787 | 0.70007  | 0.603896 | HK2/HEBP  | 2 |
| GO:00444: (entry into hos   | 2/272 | 134/18670 | 0.583787 | 0.70007  | 0.603896 | TRIM25/AI | 2 |
| GO:00485: (digestive tract  | 2/272 | 134/18670 | 0.583787 | 0.70007  | 0.603896 | HIF1A/CHL | 2 |
| GO:00024: lymphocyte m      | 5/272 | 352/18670 | 0.584951 | 0.701098 | 0.604783 | IL4R/EXOS | 5 |
| GO:00330: tetrapyrrole r    | 1/272 | 60/18670  | 0.586031 | 0.701098 | 0.604783 | LMBRD1    | 1 |
| GO:00422: (natural killer c | 1/272 | 60/18670  | 0.586031 | 0.701098 | 0.604783 | IL18      | 1 |
| GO:00467: transport of vi   | 1/272 | 60/18670  | 0.586031 | 0.701098 | 0.604783 | RAE1      | 1 |
| GO:00486: negative regul    | 1/272 | 60/18670  | 0.586031 | 0.701098 | 0.604783 | RGS2      | 1 |
| GO:00518: modulation by     | 1/272 | 60/18670  | 0.586031 | 0.701098 | 0.604783 | EIF2AK4   | 1 |
| GO:00903: regulation of c   | 1/272 | 60/18670  | 0.586031 | 0.701098 | 0.604783 | B2M       | 1 |
| GO:00315: (protein-contai   | 4/272 | 281/18670 | 0.587749 | 0.702314 | 0.605832 | UPF2/RAE: | 4 |
| GO:00064: (RNA export fr    | 2/272 | 135/18670 | 0.587841 | 0.702314 | 0.605832 | UPF2/RAE: | 2 |
| GO:00074: mesoderm de       | 2/272 | 135/18670 | 0.587841 | 0.702314 | 0.605832 | EOMES/BN  | 2 |
| GO:00103: membrane in       | 2/272 | 135/18670 | 0.587841 | 0.702314 | 0.605832 | F2RL1/THE | 2 |
| GO:00095: detection of a    | 2/272 | 136/18670 | 0.591866 | 0.706189 | 0.609175 | RGR/UNC1  | 2 |
| GO:00019: heart looping     | 1/272 | 61/18670  | 0.592082 | 0.706189 | 0.609175 | HIF1A     | 1 |
| GO:00031: heart valve de    | 1/272 | 61/18670  | 0.592082 | 0.706189 | 0.609175 | MDM4      | 1 |
| GO:00322: positive regul    | 1/272 | 61/18670  | 0.592082 | 0.706189 | 0.609175 | PFN2      | 1 |
| GO:00465: ceramide bios     | 1/272 | 61/18670  | 0.592082 | 0.706189 | 0.609175 | ASAH1     | 1 |
| GO:00316: regulation of r   | 2/272 | 137/18670 | 0.595861 | 0.708763 | 0.611395 | LRRK2/AB/ | 2 |
| GO:00464: regulation of r   | 2/272 | 137/18670 | 0.595861 | 0.708763 | 0.611395 | CDK5R1/IL | 2 |
| GO:19036: regulation of s   | 2/272 | 137/18670 | 0.595861 | 0.708763 | 0.611395 | PTGS2/THI | 2 |
| GO:00025: (somatic divers   | 1/272 | 62/18670  | 0.598044 | 0.708763 | 0.611395 | EXOSC3    | 1 |
| GO:00027: cytoplasmic pi    | 1/272 | 62/18670  | 0.598044 | 0.708763 | 0.611395 | NFKBIA    | 1 |
| GO:00075: respiratory ga    | 1/272 | 62/18670  | 0.598044 | 0.708763 | 0.611395 | CYSLTR1   | 1 |
| GO:00095: detection of v    | 1/272 | 62/18670  | 0.598044 | 0.708763 | 0.611395 | RGR       | 1 |

|                                  |           |          |          |          |           |   |
|----------------------------------|-----------|----------|----------|----------|-----------|---|
| GO:001644 somatic cell D 1/272   | 62/18670  | 0.598044 | 0.708763 | 0.611395 | EXOSC3    | 1 |
| GO:003233 regulation of c 1/272  | 62/18670  | 0.598044 | 0.708763 | 0.611395 | NFKBIA    | 1 |
| GO:003283 glomerulus de 1/272    | 62/18670  | 0.598044 | 0.708763 | 0.611395 | SULF2     | 1 |
| GO:003293 circadian regu 1/272   | 62/18670  | 0.598044 | 0.708763 | 0.611395 | AHR       | 1 |
| GO:004683 positive regul 1/272   | 62/18670  | 0.598044 | 0.708763 | 0.611395 | PTGS2     | 1 |
| GO:004883 neural nucleu 1/272    | 62/18670  | 0.598044 | 0.708763 | 0.611395 | CDK5R1    | 1 |
| GO:005043 regulation of c 1/272  | 62/18670  | 0.598044 | 0.708763 | 0.611395 | ABAT      | 1 |
| GO:005183 negative regul 1/272   | 62/18670  | 0.598044 | 0.708763 | 0.611395 | RAPGEF1   | 1 |
| GO:006033 regulation of r 1/272  | 62/18670  | 0.598044 | 0.708763 | 0.611395 | PBLD      | 1 |
| GO:007003 intrinsic apopt 1/272  | 62/18670  | 0.598044 | 0.708763 | 0.611395 | LRRK2     | 1 |
| GO:190183 negative regul 1/272   | 62/18670  | 0.598044 | 0.708763 | 0.611395 | RGS2      | 1 |
| GO:190233 regulation of s 1/272  | 62/18670  | 0.598044 | 0.708763 | 0.611395 | HECW2     | 1 |
| GO:000683 endoplasmic r 3/272    | 212/18670 | 0.599442 | 0.710013 | 0.612473 | GOLGA2/M  | 3 |
| GO:000663 phospholipid r 6/272   | 430/18670 | 0.5995   | 0.710013 | 0.612473 | ACP6/SYND | 6 |
| GO:000853 male gonad de 2/272    | 138/18670 | 0.599827 | 0.710163 | 0.612602 | NKX3-1/AF | 2 |
| GO:004553 regulation of 12/272   | 139/18670 | 0.603763 | 0.712863 | 0.614931 | IL4R/IL18 | 2 |
| GO:004653 development 2/272      | 139/18670 | 0.603763 | 0.712863 | 0.614931 | NKX3-1/AF | 2 |
| GO:006093 regulation of 2/272    | 139/18670 | 0.603763 | 0.712863 | 0.614931 | POLR2J/RA | 2 |
| GO:000683 cellular iron io 1/272 | 63/18670  | 0.603919 | 0.712863 | 0.614931 | HIF1A     | 1 |
| GO:003163 positive regul 1/272   | 63/18670  | 0.603919 | 0.712863 | 0.614931 | ABAT      | 1 |
| GO:003233 regulation of s 1/272  | 63/18670  | 0.603919 | 0.712863 | 0.614931 | NFKBIA    | 1 |
| GO:003433 protein localiz 1/272  | 63/18670  | 0.603919 | 0.712863 | 0.614931 | PICALM    | 1 |
| GO:004683 negative regul 1/272   | 63/18670  | 0.603919 | 0.712863 | 0.614931 | MAP4K4    | 1 |
| GO:200043 regulation of l 1/272  | 63/18670  | 0.603919 | 0.712863 | 0.614931 | FADD      | 1 |
| GO:000593 monosacchari 4/272     | 287/18670 | 0.604426 | 0.713223 | 0.615242 | PFKFB2/HK | 4 |
| GO:200103 regulation of r 3/272  | 214/18670 | 0.605805 | 0.714612 | 0.61644  | NKX3-1/RF | 3 |
| GO:000223 natural killer c 1/272 | 64/18670  | 0.609709 | 0.716807 | 0.618334 | IL18      | 1 |
| GO:001644 somatic divers 1/272   | 64/18670  | 0.609709 | 0.716807 | 0.618334 | EXOSC3    | 1 |
| GO:003573 positive regul 1/272   | 64/18670  | 0.609709 | 0.716807 | 0.618334 | HEBP2     | 1 |
| GO:004563 positive regul 1/272   | 64/18670  | 0.609709 | 0.716807 | 0.618334 | PTGS2     | 1 |
| GO:004673 regulation of 1/272    | 64/18670  | 0.609709 | 0.716807 | 0.618334 | POLR2J    | 1 |
| GO:004823 lymphocyte ct 1/272    | 64/18670  | 0.609709 | 0.716807 | 0.618334 | CKLF      | 1 |
| GO:004823 vesicle dockin 1/272   | 64/18670  | 0.609709 | 0.716807 | 0.618334 | STX10     | 1 |
| GO:005043 catecholamin 1/272     | 64/18670  | 0.609709 | 0.716807 | 0.618334 | ABAT      | 1 |
| GO:005093 negative regul 1/272   | 64/18670  | 0.609709 | 0.716807 | 0.618334 | THBS1     | 1 |
| GO:190363 positive regul 1/272   | 64/18670  | 0.609709 | 0.716807 | 0.618334 | PTGS2     | 1 |
| GO:000713 negative regul 4/272   | 289/18670 | 0.609894 | 0.716807 | 0.618334 | THBS1/IL4 | 4 |
| GO:000823 insulin recept 2/272   | 141/18670 | 0.611549 | 0.718514 | 0.619807 | IRS2/OSBP | 2 |
| GO:003283 cellular respor 3/272  | 216/18670 | 0.612101 | 0.718925 | 0.620161 | STAT1/IRS | 3 |
| GO:004343 response to p 6/272    | 436/18670 | 0.612969 | 0.719475 | 0.620635 | PTGS2/PR  | 6 |
| GO:007113 DNA conform 5/272      | 364/18670 | 0.614648 | 0.719475 | 0.620635 | CHD7/MCF  | 5 |
| GO:004363 cellular protei 3/272  | 217/18670 | 0.615224 | 0.719475 | 0.620635 | F2RL1/LM  | 3 |
| GO:004423 cellular lipid c 3/272 | 217/18670 | 0.615224 | 0.719475 | 0.620635 | ASAH1/CY  | 3 |
| GO:000823 regulation of 2/272    | 142/18670 | 0.615398 | 0.719475 | 0.620635 | RGS2/RGS  | 2 |
| GO:004643 membrane lip 2/272     | 142/18670 | 0.615398 | 0.719475 | 0.620635 | ASAH1/MF  | 2 |
| GO:007203 nephron deve 2/272     | 142/18670 | 0.615398 | 0.719475 | 0.620635 | SULF2/STA | 2 |
| GO:000253 monocyte che 1/272     | 65/18670  | 0.615415 | 0.719475 | 0.620635 | S100A12   | 1 |
| GO:000923 glycolipid bios 1/272  | 65/18670  | 0.615415 | 0.719475 | 0.620635 | MPPE1     | 1 |

|                            |       |           |          |          |          |           |   |
|----------------------------|-------|-----------|----------|----------|----------|-----------|---|
| GO:00148: response to acid | 1/272 | 65/18670  | 0.615415 | 0.719475 | 0.620635 | HIF1A     | 1 |
| GO:00327: regulation of r  | 1/272 | 65/18670  | 0.615415 | 0.719475 | 0.620635 | HIF1A     | 1 |
| GO:00457: positive regul   | 1/272 | 65/18670  | 0.615415 | 0.719475 | 0.620635 | DTX3L     | 1 |
| GO:00725: endothelial ce   | 1/272 | 65/18670  | 0.615415 | 0.719475 | 0.620635 | THBS1     | 1 |
| GO:00726: T cell migratio  | 1/272 | 65/18670  | 0.615415 | 0.719475 | 0.620635 | FADD      | 1 |
| GO:00068: sodium ion tra   | 3/272 | 218/18670 | 0.61833  | 0.722405 | 0.623163 | SLC5A9/HE | 3 |
| GO:00328: regulation of r  | 3/272 | 218/18670 | 0.61833  | 0.722405 | 0.623163 | TACC3/CDI | 3 |
| GO:00066: glycosphingoli   | 1/272 | 66/18670  | 0.621038 | 0.723182 | 0.623833 | ASAH1     | 1 |
| GO:00171: calcium-ion re   | 1/272 | 66/18670  | 0.621038 | 0.723182 | 0.623833 | RAB3GAP1  | 1 |
| GO:00400: regulation of r  | 1/272 | 66/18670  | 0.621038 | 0.723182 | 0.623833 | CHD7      | 1 |
| GO:00466: regulation of i  | 1/272 | 66/18670  | 0.621038 | 0.723182 | 0.623833 | OSBPL8    | 1 |
| GO:00482: vesicle targeti  | 1/272 | 66/18670  | 0.621038 | 0.723182 | 0.623833 | GOLGA2    | 1 |
| GO:00482: COPII vesicle c  | 1/272 | 66/18670  | 0.621038 | 0.723182 | 0.623833 | GOLGA2    | 1 |
| GO:00519: negative regul   | 1/272 | 66/18670  | 0.621038 | 0.723182 | 0.623833 | PTGS2     | 1 |
| GO:00990: regulation of r  | 1/272 | 66/18670  | 0.621038 | 0.723182 | 0.623833 | RAP1A     | 1 |
| GO:19052: regulation of c  | 1/272 | 66/18670  | 0.621038 | 0.723182 | 0.623833 | RGS2      | 1 |
| GO:19057: positive regul   | 1/272 | 66/18670  | 0.621038 | 0.723182 | 0.623833 | HEBP2     | 1 |
| GO:00481: Golgi vesicle t  | 5/272 | 368/18670 | 0.624269 | 0.726706 | 0.626873 | GOLPH3/E  | 5 |
| GO:00031: embryonic he     | 1/272 | 67/18670  | 0.626578 | 0.728181 | 0.628145 | HIF1A     | 1 |
| GO:00439: histone H4 ac    | 1/272 | 67/18670  | 0.626578 | 0.728181 | 0.628145 | EPC1      | 1 |
| GO:00613: determinatio     | 1/272 | 67/18670  | 0.626578 | 0.728181 | 0.628145 | HIF1A     | 1 |
| GO:00061: oxidative phos   | 2/272 | 145/18670 | 0.62677  | 0.728181 | 0.628145 | DLD/COX7  | 2 |
| GO:00076: sensory perce    | 2/272 | 145/18670 | 0.62677  | 0.728181 | 0.628145 | ZNF354A/C | 2 |
| GO:00719: negative regul   | 2/272 | 145/18670 | 0.62677  | 0.728181 | 0.628145 | PRKAR2A/I | 2 |
| GO:00458: positive regul   | 2/272 | 146/18670 | 0.630503 | 0.73142  | 0.63094  | PTGS2/IRS | 2 |
| GO:00512: negative regul   | 2/272 | 146/18670 | 0.630503 | 0.73142  | 0.63094  | MNDA/IL4  | 2 |
| GO:00551: digestive syst   | 2/272 | 146/18670 | 0.630503 | 0.73142  | 0.63094  | HIF1A/CHC | 2 |
| GO:19048: regulation of r  | 2/272 | 146/18670 | 0.630503 | 0.73142  | 0.63094  | CDK5R1/IL | 2 |
| GO:19035: regulation of t  | 4/272 | 297/18670 | 0.631298 | 0.73142  | 0.63094  | F2RL1/PTC | 4 |
| GO:00066: protein target   | 1/272 | 68/18670  | 0.632038 | 0.73142  | 0.63094  | UBE2D3    | 1 |
| GO:00336: cell adhesion    | 1/272 | 68/18670  | 0.632038 | 0.73142  | 0.63094  | PLAU      | 1 |
| GO:00508: multicellular c  | 1/272 | 68/18670  | 0.632038 | 0.73142  | 0.63094  | PRKAR2A   | 1 |
| GO:00509: positive chem    | 1/272 | 68/18670  | 0.632038 | 0.73142  | 0.63094  | F2RL1     | 1 |
| GO:00519: positive regul   | 1/272 | 68/18670  | 0.632038 | 0.73142  | 0.63094  | LRRN3     | 1 |
| GO:00726: protein localiz  | 1/272 | 68/18670  | 0.632038 | 0.73142  | 0.63094  | UBE2D3    | 1 |
| GO:00726: establishment    | 1/272 | 68/18670  | 0.632038 | 0.73142  | 0.63094  | UBE2D3    | 1 |
| GO:00102: response to io   | 2/272 | 147/18670 | 0.634206 | 0.733689 | 0.632897 | GADD45A/I | 2 |
| GO:00017: in utero embr    | 5/272 | 373/18670 | 0.636092 | 0.735631 | 0.634572 | EOMES/HI  | 5 |
| GO:00550: cardiac muscl    | 1/272 | 69/18670  | 0.637418 | 0.736924 | 0.635687 | CHD7      | 1 |
| GO:00351: appendage m      | 2/272 | 148/18670 | 0.63788  | 0.736977 | 0.635733 | PBX2/CHD  | 2 |
| GO:00351: limb morphog     | 2/272 | 148/18670 | 0.63788  | 0.736977 | 0.635733 | PBX2/CHD  | 2 |
| GO:00600: retina develop   | 2/272 | 149/18670 | 0.641526 | 0.740635 | 0.638888 | HIF1A/CHC | 2 |
| GO:20000: regulation of    | 2/272 | 149/18670 | 0.641526 | 0.740635 | 0.638888 | RPL23/LRR | 2 |
| GO:00017: somitogenesis    | 1/272 | 70/18670  | 0.64272  | 0.740635 | 0.638888 | NKX3-1    | 1 |
| GO:00033: cilium movem     | 1/272 | 70/18670  | 0.64272  | 0.740635 | 0.638888 | ROPN1L    | 1 |
| GO:00069: vesicle coating  | 1/272 | 70/18670  | 0.64272  | 0.740635 | 0.638888 | GOLGA2    | 1 |
| GO:00105: regulation of r  | 1/272 | 70/18670  | 0.64272  | 0.740635 | 0.638888 | RGS2      | 1 |
| GO:00435: peroxisomal tr   | 1/272 | 70/18670  | 0.64272  | 0.740635 | 0.638888 | UBE2D3    | 1 |



|                                  |           |          |          |          |           |   |
|----------------------------------|-----------|----------|----------|----------|-----------|---|
| GO:007098 demethylator 1/272     | 70/18670  | 0.64272  | 0.740635 | 0.638888 | UTY       | 1 |
| GO:005077 negative regul 2/272   | 150/18670 | 0.645142 | 0.743184 | 0.641087 | IL4R/PSMA | 2 |
| GO:004227 ribosomal larg 1/272   | 71/18670  | 0.647945 | 0.745442 | 0.643035 | RPL26     | 1 |
| GO:004255 positive regul 1/272   | 71/18670  | 0.647945 | 0.745442 | 0.643035 | IL18      | 1 |
| GO:004364 inositol phosph 1/272  | 71/18670  | 0.647945 | 0.745442 | 0.643035 | SYNJ2     | 1 |
| GO:004390 regulation of r 1/272  | 71/18670  | 0.647945 | 0.745442 | 0.643035 | HDAC4     | 1 |
| GO:000007 mitotic sister c 2/272 | 151/18670 | 0.64873  | 0.745861 | 0.643396 | TACC3/HEC | 2 |
| GO:005508 lipid homeost 2/272    | 151/18670 | 0.64873  | 0.745861 | 0.643396 | IRS2/IL18 | 2 |
| GO:000185 tissue homeos 3/272    | 229/18670 | 0.65137  | 0.747962 | 0.645209 | PTGS2/PBI | 3 |
| GO:001055 regulation of e 3/272  | 229/18670 | 0.65137  | 0.747962 | 0.645209 | PTGS2/THI | 3 |
| GO:003090 hindbrain dev 2/272    | 152/18670 | 0.652289 | 0.747962 | 0.645209 | CDK5R1/AI | 2 |
| GO:005107 mRNA transpc 2/272     | 152/18670 | 0.652289 | 0.747962 | 0.645209 | UPF2/RAE1 | 2 |
| GO:000630 DNA alkylator 1/272    | 72/18670  | 0.653094 | 0.747962 | 0.645209 | TDRD1     | 1 |
| GO:000630 DNA methylat 1/272     | 72/18670  | 0.653094 | 0.747962 | 0.645209 | TDRD1     | 1 |
| GO:000663 fatty acid beta 1/272  | 72/18670  | 0.653094 | 0.747962 | 0.645209 | IRS2      | 1 |
| GO:000917 nucleoside mc 1/272    | 72/18670  | 0.653094 | 0.747962 | 0.645209 | NT5C2     | 1 |
| GO:003507 somatic stem 1/272     | 72/18670  | 0.653094 | 0.747962 | 0.645209 | POLR2J    | 1 |
| GO:006118 mammary glai 1/272     | 72/18670  | 0.653094 | 0.747962 | 0.645209 | HIF1A     | 1 |
| GO:009017 COPII-coated v 1/272   | 72/18670  | 0.653094 | 0.747962 | 0.645209 | GOLGA2    | 1 |
| GO:190305 negative regul 1/272   | 72/18670  | 0.653094 | 0.747962 | 0.645209 | RPL23     | 1 |
| GO:000640 RNA localizati 3/272   | 230/18670 | 0.654271 | 0.749068 | 0.646163 | EXOSC3/UL | 3 |
| GO:000237 B cell activati 1/272  | 73/18670  | 0.658167 | 0.751342 | 0.648125 | EXOSC3    | 1 |
| GO:000628 transcription-c 1/272  | 73/18670  | 0.658167 | 0.751342 | 0.648125 | POLR2J    | 1 |
| GO:000998 cell-cell recogn 1/272 | 73/18670  | 0.658167 | 0.751342 | 0.648125 | FOLR3     | 1 |
| GO:003027 myofibril asse 1/272   | 73/18670  | 0.658167 | 0.751342 | 0.648125 | LMOD3     | 1 |
| GO:003294 negative regul 1/272   | 73/18670  | 0.658167 | 0.751342 | 0.648125 | MNDA      | 1 |
| GO:003355 multicellular c 1/272  | 73/18670  | 0.658167 | 0.751342 | 0.648125 | THBS1     | 1 |
| GO:004568 regulation of xi 1/272 | 73/18670  | 0.658167 | 0.751342 | 0.648125 | TLR2      | 1 |
| GO:005067 negative regul 1/272   | 73/18670  | 0.658167 | 0.751342 | 0.648125 | MNDA      | 1 |
| GO:190198 regulation of xi 1/272 | 73/18670  | 0.658167 | 0.751342 | 0.648125 | RPS6KA5   | 1 |
| GO:190370 negative regul 2/272   | 155/18670 | 0.662795 | 0.754374 | 0.65074  | IL4R/NFKB | 2 |
| GO:000185 retina homeos 1/272    | 74/18670  | 0.663167 | 0.754374 | 0.65074  | B2M       | 1 |
| GO:001407 positive regul 1/272   | 74/18670  | 0.663167 | 0.754374 | 0.65074  | TLR2      | 1 |
| GO:003010 water homeos 1/272     | 74/18670  | 0.663167 | 0.754374 | 0.65074  | PRKAR2A   | 1 |
| GO:003167 cellular respor 1/272  | 74/18670  | 0.663167 | 0.754374 | 0.65074  | PTGS2     | 1 |
| GO:004350 positive regul 1/272   | 74/18670  | 0.663167 | 0.754374 | 0.65074  | MAP3K2    | 1 |
| GO:004815 vesicle targeti 1/272  | 74/18670  | 0.663167 | 0.754374 | 0.65074  | GOLGA2    | 1 |
| GO:005114 smooth muscl 1/272     | 74/18670  | 0.663167 | 0.754374 | 0.65074  | EPC1      | 1 |
| GO:007037 negative regul 1/272   | 74/18670  | 0.663167 | 0.754374 | 0.65074  | RAPGEF1   | 1 |
| GO:190007 regulation of xi 1/272 | 74/18670  | 0.663167 | 0.754374 | 0.65074  | OSBPL8    | 1 |
| GO:190367 negative regul 1/272   | 74/18670  | 0.663167 | 0.754374 | 0.65074  | THBS1     | 1 |
| GO:190165 cellular respor 5/272  | 385/18670 | 0.663525 | 0.754539 | 0.650882 | PRKAR2A/! | 5 |
| GO:001657 histone acetyl 2/272   | 156/18670 | 0.66624  | 0.757139 | 0.653125 | RPS6KA5/E | 2 |
| GO:003085 regulation of xi 2/272 | 156/18670 | 0.66624  | 0.757139 | 0.653125 | STAT1/MM  | 2 |
| GO:000170 mesoderm for 1/272     | 75/18670  | 0.668094 | 0.757544 | 0.653475 | EOMES     | 1 |
| GO:000220 somatic divers 1/272   | 75/18670  | 0.668094 | 0.757544 | 0.653475 | EXOSC3    | 1 |
| GO:000328 ventricular seq 1/272  | 75/18670  | 0.668094 | 0.757544 | 0.653475 | MDM4      | 1 |
| GO:001067 regulation of xi 1/272 | 75/18670  | 0.668094 | 0.757544 | 0.653475 | RGS2      | 1 |

|                                 |           |          |          |          |            |   |
|---------------------------------|-----------|----------|----------|----------|------------|---|
| GO:00215: diencephalon 1/272    | 75/18670  | 0.668094 | 0.757544 | 0.653475 | RAB3GAP1   | 1 |
| GO:00461: polyol biosynt 1/272  | 75/18670  | 0.668094 | 0.757544 | 0.653475 | ASAH1      | 1 |
| GO:19021: positive regul 1/272  | 75/18670  | 0.668094 | 0.757544 | 0.653475 | RAB3GAP1   | 1 |
| GO:00423: vasoconstricti 1/272  | 76/18670  | 0.672949 | 0.761937 | 0.657264 | PTGS2      | 1 |
| GO:00488: artery morpho 1/272   | 76/18670  | 0.672949 | 0.761937 | 0.657264 | CHD7       | 1 |
| GO:00604: cardiac septur 1/272  | 76/18670  | 0.672949 | 0.761937 | 0.657264 | CHD7       | 1 |
| GO:00720: nephron epith 1/272   | 76/18670  | 0.672949 | 0.761937 | 0.657264 | STAT1      | 1 |
| GO:00521: movement in 2/272     | 158/18670 | 0.673045 | 0.761937 | 0.657264 | TRIM25/AI  | 2 |
| GO:00068: receptor-med 4/272    | 314/18670 | 0.674227 | 0.763031 | 0.658208 | UNC119/C   | 4 |
| GO:00083: adult locomot 1/272   | 77/18670  | 0.677733 | 0.765531 | 0.660365 | CHD7       | 1 |
| GO:00092: purine ribonu 1/272   | 77/18670  | 0.677733 | 0.765531 | 0.660365 | LRRK2      | 1 |
| GO:00350: embryonic he 1/272    | 77/18670  | 0.677733 | 0.765531 | 0.660365 | HIF1A      | 1 |
| GO:00483: mesoderm m 1/272      | 77/18670  | 0.677733 | 0.765531 | 0.660365 | EOMES      | 1 |
| GO:00519: catecholamin 1/272    | 77/18670  | 0.677733 | 0.765531 | 0.660365 | ABAT       | 1 |
| GO:20007: regulation of c 1/272 | 77/18670  | 0.677733 | 0.765531 | 0.660365 | DTX3L      | 1 |
| GO:00466: male sex diffe 2/272  | 160/18670 | 0.679737 | 0.767305 | 0.661895 | NKX3-1/AF  | 2 |
| GO:20002: regulation of r 2/272 | 160/18670 | 0.679737 | 0.767305 | 0.661895 | NKX3-1/HI  | 2 |
| GO:00147: regulation of r 1/272 | 78/18670  | 0.682448 | 0.76816  | 0.662633 | RGS2       | 1 |
| GO:00304: ubiquitin-dep 1/272   | 78/18670  | 0.682448 | 0.76816  | 0.662633 | TRIM25     | 1 |
| GO:00434: negative regul 1/272  | 78/18670  | 0.682448 | 0.76816  | 0.662633 | RGS2       | 1 |
| GO:00550: regulation of c 1/272 | 78/18670  | 0.682448 | 0.76816  | 0.662633 | RGS2       | 1 |
| GO:00706: negative regul 1/272  | 78/18670  | 0.682448 | 0.76816  | 0.662633 | MNDA       | 1 |
| GO:00720: nephron mor 1/272     | 78/18670  | 0.682448 | 0.76816  | 0.662633 | STAT1      | 1 |
| GO:00723: intrinsic apopt 1/272 | 78/18670  | 0.682448 | 0.76816  | 0.662633 | RPL26      | 1 |
| GO:00903: cellular senesc 1/272 | 78/18670  | 0.682448 | 0.76816  | 0.662633 | B2M        | 1 |
| GO:20002: positive regul 1/272  | 78/18670  | 0.682448 | 0.76816  | 0.662633 | HDAC4      | 1 |
| GO:00109: transport alon 2/272  | 161/18670 | 0.683041 | 0.76834  | 0.662787 | KIF1B/HIF1 | 2 |
| GO:00183: internal peptic 2/272 | 161/18670 | 0.683041 | 0.76834  | 0.662787 | RPS6KA5/E  | 2 |
| GO:00900: regulation of t 3/272 | 241/18670 | 0.685039 | 0.770342 | 0.664515 | TOB1/THB   | 3 |
| GO:00072: positive regul 4/272  | 319/18670 | 0.686177 | 0.770938 | 0.665029 | F2RL1/CYS  | 4 |
| GO:00015: vasculogenesi 1/272   | 79/18670  | 0.687093 | 0.770938 | 0.665029 | RAP1A      | 1 |
| GO:00031: outflow tract 1/272   | 79/18670  | 0.687093 | 0.770938 | 0.665029 | HIF1A      | 1 |
| GO:00311: regulation of r 1/272 | 79/18670  | 0.687093 | 0.770938 | 0.665029 | CDK5R1     | 1 |
| GO:00435: negative regul 1/272  | 79/18670  | 0.687093 | 0.770938 | 0.665029 | THBS1      | 1 |
| GO:19000: regulation of c 1/272 | 79/18670  | 0.687093 | 0.770938 | 0.665029 | RAE1       | 1 |
| GO:19033: negative regul 1/272  | 79/18670  | 0.687093 | 0.770938 | 0.665029 | TOB1       | 1 |
| GO:00713: cellular respor 4/272 | 321/18670 | 0.69087  | 0.774931 | 0.668473 | PRKAR2A/!  | 4 |
| GO:00705: calcium ion irr 1/272 | 80/18670  | 0.691671 | 0.775369 | 0.668851 | CACNA1E    | 1 |
| GO:00015: ossification 5/272    | 398/18670 | 0.691699 | 0.775369 | 0.668851 | TOB1/PTG   | 5 |
| GO:00070: regulation of r 2/272 | 164/18670 | 0.692787 | 0.776342 | 0.66969  | TACC3/HE   | 2 |
| GO:00329: protein-contai 4/272  | 323/18670 | 0.695514 | 0.778177 | 0.671273 | F2RL1/RPL  | 4 |
| GO:00509: sensory perce 2/272   | 165/18670 | 0.69598  | 0.778177 | 0.671273 | ZNF354A/C  | 2 |
| GO:00070: peroxisome or 1/272   | 81/18670  | 0.696183 | 0.778177 | 0.671273 | UBE2D3     | 1 |
| GO:00140: neural crest c 1/272  | 81/18670  | 0.696183 | 0.778177 | 0.671273 | HIF1A      | 1 |
| GO:00217: hippocampus 1/272     | 81/18670  | 0.696183 | 0.778177 | 0.671273 | CDK5R1     | 1 |
| GO:00305: negative regul 1/272  | 81/18670  | 0.696183 | 0.778177 | 0.671273 | PBLD       | 1 |
| GO:00324: positive regul 1/272  | 81/18670  | 0.696183 | 0.778177 | 0.671273 | LRRK2      | 1 |
| GO:00341: homotypic cel 1/272   | 81/18670  | 0.696183 | 0.778177 | 0.671273 | ABAT       | 1 |

|                             |       |           |          |          |          |           |   |
|-----------------------------|-------|-----------|----------|----------|----------|-----------|---|
| GO:000647: internal prote   | 2/272 | 166/18670 | 0.699146 | 0.781243 | 0.673918 | RPS6KA5/E | 2 |
| GO:005127: regulation of r  | 1/272 | 82/18670  | 0.700628 | 0.782405 | 0.67492  | CHD7      | 1 |
| GO:006047: muscle tissue    | 1/272 | 82/18670  | 0.700628 | 0.782405 | 0.67492  | CHD7      | 1 |
| GO:003505: cardiocyte dif   | 2/272 | 167/18670 | 0.702285 | 0.784008 | 0.676303 | RGS2/EOM  | 2 |
| GO:000915: ribonucleosid    | 1/272 | 83/18670  | 0.705009 | 0.785253 | 0.677377 | LRRK2     | 1 |
| GO:003457: protein localiz  | 1/272 | 83/18670  | 0.705009 | 0.785253 | 0.677377 | MCM8      | 1 |
| GO:004257: regulation of t  | 1/272 | 83/18670  | 0.705009 | 0.785253 | 0.677377 | IL18      | 1 |
| GO:004647: phosphatidylc    | 1/272 | 83/18670  | 0.705009 | 0.785253 | 0.677377 | MBOAT1    | 1 |
| GO:004817: regulation of f  | 1/272 | 83/18670  | 0.705009 | 0.785253 | 0.677377 | S100A6    | 1 |
| GO:007127: cellular respor  | 1/272 | 83/18670  | 0.705009 | 0.785253 | 0.677377 | ALOX5AP   | 1 |
| GO:190387: negative regul   | 1/272 | 83/18670  | 0.705009 | 0.785253 | 0.677377 | PBLD      | 1 |
| GO:000715: homophilic ce    | 2/272 | 168/18670 | 0.705396 | 0.785253 | 0.677377 | CDH2/NPT  | 2 |
| GO:005137: regulation of c  | 2/272 | 168/18670 | 0.705396 | 0.785253 | 0.677377 | NKX3-1/EV | 2 |
| GO:001567: inorganic anio   | 2/272 | 169/18670 | 0.708481 | 0.786905 | 0.678802 | CLCC1/SLC | 2 |
| GO:001837: peptidyl-lysin   | 2/272 | 169/18670 | 0.708481 | 0.786905 | 0.678802 | RPS6KA5/E | 2 |
| GO:000637: transcription    | 1/272 | 84/18670  | 0.709326 | 0.786905 | 0.678802 | POLR2J    | 1 |
| GO:000697: phagocytosis,    | 1/272 | 84/18670  | 0.709326 | 0.786905 | 0.678802 | CLEC7A    | 1 |
| GO:004687: positive regul   | 1/272 | 84/18670  | 0.709326 | 0.786905 | 0.678802 | PTGS2     | 1 |
| GO:004817: fibroblast prol  | 1/272 | 84/18670  | 0.709326 | 0.786905 | 0.678802 | S100A6    | 1 |
| GO:005147: regulation of i  | 1/272 | 84/18670  | 0.709326 | 0.786905 | 0.678802 | LRRK2     | 1 |
| GO:005147: regulation of s  | 1/272 | 84/18670  | 0.709326 | 0.786905 | 0.678802 | PFN2      | 1 |
| GO:006047: regulation of t  | 1/272 | 84/18670  | 0.709326 | 0.786905 | 0.678802 | RGS2      | 1 |
| GO:009777: negative regul   | 1/272 | 84/18670  | 0.709326 | 0.786905 | 0.678802 | PTGS2     | 1 |
| GO:190587: regulation of r  | 1/272 | 84/18670  | 0.709326 | 0.786905 | 0.678802 | LRRK2     | 1 |
| GO:000207: regulation of s  | 1/272 | 85/18670  | 0.71358  | 0.790151 | 0.681602 | HECW2     | 1 |
| GO:000917: purine nucleo:   | 1/272 | 85/18670  | 0.71358  | 0.790151 | 0.681602 | LRRK2     | 1 |
| GO:001407: mesenchymal      | 1/272 | 85/18670  | 0.71358  | 0.790151 | 0.681602 | HIF1A     | 1 |
| GO:004887: stem cell deve   | 1/272 | 85/18670  | 0.71358  | 0.790151 | 0.681602 | HIF1A     | 1 |
| GO:005077: positive regul   | 1/272 | 85/18670  | 0.71358  | 0.790151 | 0.681602 | TNFRSF12A | 1 |
| GO:000827: steroid metab    | 4/272 | 331/18670 | 0.713591 | 0.790151 | 0.681602 | HSD17B11  | 4 |
| GO:003037: lung developn    | 2/272 | 172/18670 | 0.717573 | 0.793033 | 0.684088 | MME/CRIS  | 2 |
| GO:000197: hair follicle de | 1/272 | 86/18670  | 0.717772 | 0.793033 | 0.684088 | TGM3      | 1 |
| GO:000637: double-strand    | 1/272 | 86/18670  | 0.717772 | 0.793033 | 0.684088 | DTX3L     | 1 |
| GO:000687: retrograde ve:   | 1/272 | 86/18670  | 0.717772 | 0.793033 | 0.684088 | GOLPH3    | 1 |
| GO:000727: tyrosine phos    | 1/272 | 86/18670  | 0.717772 | 0.793033 | 0.684088 | IL18      | 1 |
| GO:003017: natural killer c | 1/272 | 86/18670  | 0.717772 | 0.793033 | 0.684088 | IL18      | 1 |
| GO:190337: negative regul   | 1/272 | 86/18670  | 0.717772 | 0.793033 | 0.684088 | RPL23     | 1 |
| GO:001607: lipid catabolic  | 4/272 | 333/18670 | 0.717986 | 0.793033 | 0.684088 | HSD17B11  | 4 |
| GO:003037: negative regul   | 4/272 | 334/18670 | 0.720165 | 0.795191 | 0.68595  | THBS1/PFN | 4 |
| GO:001657: negative regul   | 2/272 | 173/18670 | 0.720551 | 0.795369 | 0.686104 | THBS1/STA | 2 |
| GO:004587: positive regul   | 1/272 | 87/18670  | 0.721902 | 0.796117 | 0.686748 | LMOD3     | 1 |
| GO:004867: positive regul   | 1/272 | 87/18670  | 0.721902 | 0.796117 | 0.686748 | LMOD3     | 1 |
| GO:005177: positive regul   | 1/272 | 87/18670  | 0.721902 | 0.796117 | 0.686748 | NKX3-1    | 1 |
| GO:002247: molting cycle    | 1/272 | 88/18670  | 0.725973 | 0.798119 | 0.688476 | TGM3      | 1 |
| GO:002247: hair cycle proc  | 1/272 | 88/18670  | 0.725973 | 0.798119 | 0.688476 | TGM3      | 1 |
| GO:003207: negative regul   | 1/272 | 88/18670  | 0.725973 | 0.798119 | 0.688476 | NFKBIA    | 1 |
| GO:003417: regulation of t  | 1/272 | 88/18670  | 0.725973 | 0.798119 | 0.688476 | IL18      | 1 |
| GO:004307: ATP-depender     | 1/272 | 88/18670  | 0.725973 | 0.798119 | 0.688476 | CHD8      | 1 |

|                                  |           |          |          |          |            |   |
|----------------------------------|-----------|----------|----------|----------|------------|---|
| GO:004356: regulation of J1/272  | 88/18670  | 0.725973 | 0.798119 | 0.688476 | MAP3K2     | 1 |
| GO:004864: muscle organ 1/272    | 88/18670  | 0.725973 | 0.798119 | 0.688476 | CHD7       | 1 |
| GO:009877: skin epidermis 1/272  | 88/18670  | 0.725973 | 0.798119 | 0.688476 | TGM3       | 1 |
| GO:190186: positive regulat1/272 | 88/18670  | 0.725973 | 0.798119 | 0.688476 | LMOD3      | 1 |
| GO:190403: regulation of e1/272  | 88/18670  | 0.725973 | 0.798119 | 0.688476 | THBS1      | 1 |
| GO:000265: negative regul2/272   | 175/18670 | 0.726427 | 0.798123 | 0.688479 | MNDA/IL4   | 2 |
| GO:200018: negative regul2/272   | 175/18670 | 0.726427 | 0.798123 | 0.688479 | THBS1/STAF | 2 |
| GO:007256: cellular dival16/272  | 493/18670 | 0.727448 | 0.798997 | 0.689233 | F2RL1/S10  | 6 |
| GO:005105: regulation of s4/272  | 338/18670 | 0.728757 | 0.800044 | 0.690136 | F2RL1/RAF  | 4 |
| GO:000698: response to u12/272   | 176/18670 | 0.729326 | 0.800044 | 0.690136 | THBS1/EIF1 | 2 |
| GO:003033: respiratory tul2/272  | 176/18670 | 0.729326 | 0.800044 | 0.690136 | MME/CRIS   | 2 |
| GO:004643: positive regulat1/272 | 89/18670  | 0.729984 | 0.800044 | 0.690136 | IL18       | 1 |
| GO:005503: cardiac muscl1/272    | 89/18670  | 0.729984 | 0.800044 | 0.690136 | RGS2       | 1 |
| GO:006003: roof of mouth 1/272   | 89/18670  | 0.729984 | 0.800044 | 0.690136 | CHD7       | 1 |
| GO:009736: cellular respor1/272  | 89/18670  | 0.729984 | 0.800044 | 0.690136 | AHR        | 1 |
| GO:000306: heart morpho 3/272    | 259/18670 | 0.730912 | 0.800814 | 0.6908   | MDM4/HIF1  | 3 |
| GO:001073: regulation of e1/272  | 90/18670  | 0.733937 | 0.803133 | 0.692801 | PBLD       | 1 |
| GO:001403: neural crest c1/272   | 90/18670  | 0.733937 | 0.803133 | 0.692801 | HIF1A      | 1 |
| GO:001584: monoamine tr1/272     | 90/18670  | 0.733937 | 0.803133 | 0.692801 | ABAT       | 1 |
| GO:003064: regulation of c1/272  | 90/18670  | 0.733937 | 0.803133 | 0.692801 | LRRK2      | 1 |
| GO:190406: regulation of c4/272  | 342/18670 | 0.737151 | 0.805442 | 0.694792 | RGS2/HEC1  | 4 |
| GO:001593: phospholipid t1/272   | 91/18670  | 0.737832 | 0.805442 | 0.694792 | OSBPL8     | 1 |
| GO:003053: regulation of f1/272  | 91/18670  | 0.737832 | 0.805442 | 0.694792 | TOB1       | 1 |
| GO:004563: negative regul1/272   | 91/18670  | 0.737832 | 0.805442 | 0.694792 | NFKBIA     | 1 |
| GO:000647: protein methy2/272    | 179/18670 | 0.737866 | 0.805442 | 0.694792 | PCMTD1/A   | 2 |
| GO:000823: protein alkylat2/272  | 179/18670 | 0.737866 | 0.805442 | 0.694792 | PCMTD1/A   | 2 |
| GO:004873: appendage de2/272     | 179/18670 | 0.737866 | 0.805442 | 0.694792 | PBX2/CHD   | 2 |
| GO:006013: limb developn2/272    | 179/18670 | 0.737866 | 0.805442 | 0.694792 | PBX2/CHD   | 2 |
| GO:002246: negative regul2/272   | 180/18670 | 0.740662 | 0.807995 | 0.696995 | IL4R/ABAT  | 2 |
| GO:003076: cytoskeleton-c2/272   | 180/18670 | 0.740662 | 0.807995 | 0.696995 | KIF1B/HIF1 | 2 |
| GO:000667: ceramide met1/272     | 92/18670  | 0.74167  | 0.808596 | 0.697513 | ASAH1      | 1 |
| GO:190489: positive regulat1/272 | 92/18670  | 0.74167  | 0.808596 | 0.697513 | IL18       | 1 |
| GO:014003: mitotic nuclea3/272   | 264/18670 | 0.742686 | 0.809454 | 0.698254 | TACC3/GO   | 3 |
| GO:000696: vesicle target1/272   | 93/18670  | 0.745452 | 0.810473 | 0.699133 | GOLGA2     | 1 |
| GO:003527: miRNA media1/272      | 93/18670  | 0.745452 | 0.810473 | 0.699133 | TNRC6B     | 1 |
| GO:004003: negative regul1/272   | 93/18670  | 0.745452 | 0.810473 | 0.699133 | TNRC6B     | 1 |
| GO:004597: regulation of t1/272  | 93/18670  | 0.745452 | 0.810473 | 0.699133 | TNRC6B     | 1 |
| GO:005166: localization wi1/272  | 93/18670  | 0.745452 | 0.810473 | 0.699133 | CDH2       | 1 |
| GO:007208: nephron tubul1/272    | 93/18670  | 0.745452 | 0.810473 | 0.699133 | STAT1      | 1 |
| GO:190165: cellular respor1/272  | 93/18670  | 0.745452 | 0.810473 | 0.699133 | AHR        | 1 |
| GO:190335: cellular respor1/272  | 93/18670  | 0.745452 | 0.810473 | 0.699133 | LRRK2      | 1 |
| GO:000204: sprouting angi2/272   | 183/18670 | 0.748897 | 0.812778 | 0.701121 | PTGS2/THI  | 2 |
| GO:002195: central nervoi2/272   | 183/18670 | 0.748897 | 0.812778 | 0.701121 | B2M/EOM    | 2 |
| GO:000073: non-recombin1/272     | 94/18670  | 0.749179 | 0.812778 | 0.701121 | DTX3L      | 1 |
| GO:000603: proteoglycan 1/272    | 94/18670  | 0.749179 | 0.812778 | 0.701121 | SULF2      | 1 |
| GO:004473: DNA methylat1/272     | 94/18670  | 0.749179 | 0.812778 | 0.701121 | TDRD1      | 1 |
| GO:190335: response to d1/272    | 94/18670  | 0.749179 | 0.812778 | 0.701121 | LRRK2      | 1 |
| GO:199054: mitochondrial 1/272   | 94/18670  | 0.749179 | 0.812778 | 0.701121 | SLC25A20   | 1 |

|                                  |           |          |          |          |            |   |
|----------------------------------|-----------|----------|----------|----------|------------|---|
| GO:200014: negative regul4/272   | 349/1867C | 0.75137  | 0.814267 | 0.702405 | THBS1/PFN  | 4 |
| GO:001993: cAMP-mediated 2/272   | 184/1867C | 0.751592 | 0.814267 | 0.702405 | RGS2/AHR   | 2 |
| GO:004863: positive regul2/272   | 184/1867C | 0.751592 | 0.814267 | 0.702405 | TNFRSF12A  | 2 |
| GO:000283: negative regul1/272   | 95/18670  | 0.752852 | 0.814267 | 0.702405 | PPM1B      | 1 |
| GO:005083: regulation of s1/272  | 95/18670  | 0.752852 | 0.814267 | 0.702405 | ASAH1      | 1 |
| GO:005503: cardiac cell de1/272  | 95/18670  | 0.752852 | 0.814267 | 0.702405 | RGS2       | 1 |
| GO:006133: renal tubule d1/272   | 95/18670  | 0.752852 | 0.814267 | 0.702405 | STAT1      | 1 |
| GO:011003: regulation of e1/272  | 95/18670  | 0.752852 | 0.814267 | 0.702405 | PFN2       | 1 |
| GO:190303: regulation of r1/272  | 95/18670  | 0.752852 | 0.814267 | 0.702405 | PICALM     | 1 |
| GO:200003: positive regul1/272   | 95/18670  | 0.752852 | 0.814267 | 0.702405 | LRRK2      | 1 |
| GO:005123: protein homo4/272     | 351/1867C | 0.755323 | 0.81669  | 0.704495 | UPB1/B2M   | 4 |
| GO:000754: sex differentia3/272  | 270/1867C | 0.756272 | 0.817432 | 0.705135 | NKX3-1/CF  | 3 |
| GO:004263: cholesterol hc1/272   | 96/18670  | 0.756471 | 0.817432 | 0.705135 | IL18       | 1 |
| GO:190134: negative regul2/272   | 187/1867C | 0.759527 | 0.819285 | 0.706734 | THBS1/STAF | 2 |
| GO:001055: negative regul1/272   | 97/18670  | 0.760037 | 0.819285 | 0.706734 | THBS1      | 1 |
| GO:001403: primary neuro1/272    | 97/18670  | 0.760037 | 0.819285 | 0.706734 | HIF1A      | 1 |
| GO:003033: osteoclast diff1/272  | 97/18670  | 0.760037 | 0.819285 | 0.706734 | OSCAR      | 1 |
| GO:003223: regulation of e1/272  | 97/18670  | 0.760037 | 0.819285 | 0.706734 | PFN2       | 1 |
| GO:004873: oligodendrocy1/272    | 97/18670  | 0.760037 | 0.819285 | 0.706734 | TLR2       | 1 |
| GO:005505: sterol homeos1/272    | 97/18670  | 0.760037 | 0.819285 | 0.706734 | IL18       | 1 |
| GO:009063: activation of C1/272  | 97/18670  | 0.760037 | 0.819285 | 0.706734 | RAPGEF1    | 1 |
| GO:000633: transcription i2/272  | 188/1867C | 0.762124 | 0.821034 | 0.708242 | POLR2J/TA  | 2 |
| GO:005173: regulation of r2/272  | 188/1867C | 0.762124 | 0.821034 | 0.708242 | TACC3/HEC  | 2 |
| GO:009874: cell-cell adhes3/272  | 273/1867C | 0.762846 | 0.821322 | 0.708491 | NTNG2/CC   | 3 |
| GO:000183: blastocyst dev1/272   | 98/18670  | 0.763551 | 0.821322 | 0.708491 | EOMES      | 1 |
| GO:000683: regulation of r1/272  | 98/18670  | 0.763551 | 0.821322 | 0.708491 | LRRK2      | 1 |
| GO:004243: inner ear mor1/272    | 98/18670  | 0.763551 | 0.821322 | 0.708491 | CHD7       | 1 |
| GO:006013: regulation of l1/272  | 98/18670  | 0.763551 | 0.821322 | 0.708491 | RGS2       | 1 |
| GO:000008: sister chroma2/272    | 189/1867C | 0.764696 | 0.822303 | 0.709337 | TACC3/HEC  | 2 |
| GO:005143: regulation of c4/272  | 357/1867C | 0.766892 | 0.823296 | 0.710194 | F2RL1/CYS  | 4 |
| GO:000173: cell fate specif1/272 | 99/18670  | 0.767014 | 0.823296 | 0.710194 | EOMES      | 1 |
| GO:001933: fatty acid oxid1/272  | 99/18670  | 0.767014 | 0.823296 | 0.710194 | IRS2       | 1 |
| GO:003033: cholesterol tra1/272  | 99/18670  | 0.767014 | 0.823296 | 0.710194 | NFKBIA     | 1 |
| GO:006203: negative regul1/272   | 99/18670  | 0.767014 | 0.823296 | 0.710194 | HDAC4      | 1 |
| GO:007253: pyrimidine-co1/272    | 99/18670  | 0.767014 | 0.823296 | 0.710194 | UPB1       | 1 |
| GO:005103: positive regul2/272   | 191/1867C | 0.769767 | 0.825208 | 0.711843 | EXOSC3/D   | 2 |
| GO:000723: glutamate rec1/272    | 100/1867C | 0.770427 | 0.825208 | 0.711843 | CDK5R1     | 1 |
| GO:002263: digestive syste1/272  | 100/1867C | 0.770427 | 0.825208 | 0.711843 | PBLD       | 1 |
| GO:003444: substrate adhe1/272   | 100/1867C | 0.770427 | 0.825208 | 0.711843 | MEGF9      | 1 |
| GO:003523: segmentation1/272     | 100/1867C | 0.770427 | 0.825208 | 0.711843 | NKX3-1     | 1 |
| GO:003653: ERAD pathwa1/272      | 100/1867C | 0.770427 | 0.825208 | 0.711843 | TRIM25     | 1 |
| GO:005503: regulation of c1/272  | 100/1867C | 0.770427 | 0.825208 | 0.711843 | RGS2       | 1 |
| GO:190113: carbohydrate2/272     | 192/1867C | 0.772268 | 0.826929 | 0.713328 | PDE7A/UP   | 2 |
| GO:003053: intracellular re3/272 | 278/1867C | 0.773483 | 0.827557 | 0.71387  | NKX3-1/NF  | 3 |
| GO:000003: regulation of l1/272  | 101/1867C | 0.773789 | 0.827557 | 0.71387  | EXOSC3     | 1 |
| GO:000763: feeding behav1/272    | 101/1867C | 0.773789 | 0.827557 | 0.71387  | EIF2AK4    | 1 |
| GO:003444: lipid oxidation1/272  | 101/1867C | 0.773789 | 0.827557 | 0.71387  | IRS2       | 1 |
| GO:005063: nucleic acid tr2/272  | 193/1867C | 0.774744 | 0.828078 | 0.714319 | UPF2/RAE   | 2 |

|                                 |           |          |          |          |           |   |
|---------------------------------|-----------|----------|----------|----------|-----------|---|
| GO:00506: RNA transport 2/272   | 193/1867C | 0.774744 | 0.828078 | 0.714319 | UPF2/RAE1 | 2 |
| GO:00025: antigen process 1/272 | 102/1867C | 0.777103 | 0.829448 | 0.7155   | THBS1     | 1 |
| GO:00105: regulation of c 1/272 | 102/1867C | 0.777103 | 0.829448 | 0.7155   | CHD7      | 1 |
| GO:00301: sphingolipid b 1/272  | 102/1867C | 0.777103 | 0.829448 | 0.7155   | ASAH1     | 1 |
| GO:00458: negative regul 1/272  | 102/1867C | 0.777103 | 0.829448 | 0.7155   | EPC1      | 1 |
| GO:19021: regulation of c 2/272 | 194/1867C | 0.777197 | 0.829448 | 0.7155   | RAB3GAP1  | 2 |
| GO:00072: integrin-medi 1/272   | 103/1867C | 0.780368 | 0.832079 | 0.71777  | BST1      | 1 |
| GO:00189: phenol-contai 1/272   | 103/1867C | 0.780368 | 0.832079 | 0.71777  | ABAT      | 1 |
| GO:19021: negative regul 1/272  | 103/1867C | 0.780368 | 0.832079 | 0.71777  | IL4R      | 1 |
| GO:00600: heart contract 3/272  | 282/1867C | 0.781711 | 0.832852 | 0.718437 | RGS2/TNN  | 3 |
| GO:00017: morphogenes 2/272     | 196/1867C | 0.782034 | 0.832852 | 0.718437 | NKX3-1/LR | 2 |
| GO:00512: establishment 2/272   | 196/1867C | 0.782034 | 0.832852 | 0.718437 | UPF2/RAE1 | 2 |
| GO:00718: DNA biosynth 2/272    | 196/1867C | 0.782034 | 0.832852 | 0.718437 | USP10/TRI | 2 |
| GO:00086: intrinsic apopt 1/272 | 104/1867C | 0.783586 | 0.833752 | 0.719213 | RPL26     | 1 |
| GO:00901: positive regul 1/272  | 104/1867C | 0.783586 | 0.833752 | 0.719213 | THBS1     | 1 |
| GO:19018: positive regul 1/272  | 104/1867C | 0.783586 | 0.833752 | 0.719213 | LRRK2     | 1 |
| GO:00018: neural tube fo 1/272  | 105/1867C | 0.786756 | 0.835642 | 0.720843 | HIF1A     | 1 |
| GO:00066: triglyceride m 1/272  | 105/1867C | 0.786756 | 0.835642 | 0.720843 | ACSL1     | 1 |
| GO:00070: plasma memb 1/272     | 105/1867C | 0.786756 | 0.835642 | 0.720843 | BIN3      | 1 |
| GO:00085: regulation of I 1/272 | 105/1867C | 0.786756 | 0.835642 | 0.720843 | NFKBIA    | 1 |
| GO:00550: cardiac muscl 1/272   | 105/1867C | 0.786756 | 0.835642 | 0.720843 | RGS2      | 1 |
| GO:00468: regulation of I 2/272 | 198/1867C | 0.786778 | 0.835642 | 0.720843 | PTGS2/ASA | 2 |
| GO:00070: microtubule-b 3/272   | 285/1867C | 0.787719 | 0.83639  | 0.721489 | ROPN1L/K  | 3 |
| GO:00359: response to tc 2/272  | 199/1867C | 0.789116 | 0.837622 | 0.722552 | THBS1/EIF | 2 |
| GO:00509: neuromuscula 1/272    | 107/1867C | 0.792959 | 0.84145  | 0.725853 | CHD8      | 1 |
| GO:00067: sulfur compou 4/272   | 372/1867C | 0.793952 | 0.84225  | 0.726544 | DLD/ACSL1 | 4 |
| GO:00300: cellular mono 1/272   | 108/1867C | 0.795993 | 0.844163 | 0.728194 | LRRK2     | 1 |
| GO:00062: nucleotide-ex 1/272   | 109/1867C | 0.798982 | 0.846066 | 0.729835 | POLR2J    | 1 |
| GO:00091: nucleoside tri 1/272  | 109/1867C | 0.798982 | 0.846066 | 0.729835 | LRRK2     | 1 |
| GO:00718: cellular respor 1/272 | 109/1867C | 0.798982 | 0.846066 | 0.729835 | LRRK2     | 1 |
| GO:00718: cellular respor 1/272 | 109/1867C | 0.798982 | 0.846066 | 0.729835 | LRRK2     | 1 |
| GO:00720: nephron epith 1/272   | 109/1867C | 0.798982 | 0.846066 | 0.729835 | STAT1     | 1 |
| GO:00064: protein acetyl 2/272  | 204/1867C | 0.800471 | 0.847388 | 0.730976 | RPS6KA5/E | 2 |
| GO:00030: heart process 3/272   | 292/1867C | 0.801208 | 0.847916 | 0.731431 | RGS2/TNN  | 3 |
| GO:00060: glycosaminogl 1/272   | 110/1867C | 0.801928 | 0.848424 | 0.731869 | ABCC5     | 1 |
| GO:00316: receptor inter 1/272  | 111/1867C | 0.804831 | 0.850986 | 0.73408  | PICALM    | 1 |
| GO:19040: epithelial cell 1/272 | 111/1867C | 0.804831 | 0.850986 | 0.73408  | THBS1     | 1 |
| GO:00485: rhythmic proc 3/272   | 295/1867C | 0.806767 | 0.852229 | 0.735152 | CDK5R1/CI | 3 |
| GO:00066: membrane lip 2/272    | 207/1867C | 0.807022 | 0.852229 | 0.735152 | ASAH1/MF  | 2 |
| GO:00019: positive regul 1/272  | 112/1867C | 0.807691 | 0.852229 | 0.735152 | HIF1A     | 1 |
| GO:00063: DNA-template 1/272    | 112/1867C | 0.807691 | 0.852229 | 0.735152 | POLR2J    | 1 |
| GO:00508: negative regul 1/272  | 112/1867C | 0.807691 | 0.852229 | 0.735152 | IL4R      | 1 |
| GO:00604: heart growth 1/272    | 112/1867C | 0.807691 | 0.852229 | 0.735152 | RGS2      | 1 |
| GO:19035: mucopolysacc 1/272    | 112/1867C | 0.807691 | 0.852229 | 0.735152 | ABCC5     | 1 |
| GO:00400: negative regul 4/272  | 381/1867C | 0.808946 | 0.852764 | 0.735614 | THBS1/PFM | 4 |
| GO:00421: regulation of r 4/272 | 381/1867C | 0.808946 | 0.852764 | 0.735614 | MDM4/RP   | 4 |
| GO:00160: carbohydrate 2/272    | 208/1867C | 0.809162 | 0.852764 | 0.735614 | IRS2/PPP1 | 2 |
| GO:19012: negative regul 2/272  | 208/1867C | 0.809162 | 0.852764 | 0.735614 | HIF1A/LRR | 2 |

|                            |       |           |          |          |          |           |   |
|----------------------------|-------|-----------|----------|----------|----------|-----------|---|
| GO:00466: regulation of c  | 1/272 | 113/1867C | 0.81051  | 0.853422 | 0.736181 | RGS2      | 1 |
| GO:00718: response to m    | 1/272 | 113/1867C | 0.81051  | 0.853422 | 0.736181 | LRRK2     | 1 |
| GO:00718: response to c    | 1/272 | 113/1867C | 0.81051  | 0.853422 | 0.736181 | LRRK2     | 1 |
| GO:00512: cartilage deve   | 2/272 | 209/1867C | 0.811282 | 0.853981 | 0.736664 | SULF2/HIF | 2 |
| GO:00485: response to st   | 4/272 | 383/1867C | 0.812155 | 0.854646 | 0.737237 | NKX3-1/PT | 4 |
| GO:00349: histone lysine   | 1/272 | 114/1867C | 0.813287 | 0.855427 | 0.737911 | ARID4A    | 1 |
| GO:00071: establishment    | 2/272 | 210/1867C | 0.813381 | 0.855427 | 0.737911 | GOLPH3/A  | 2 |
| GO:00512: negative regul   | 4/272 | 384/1867C | 0.813743 | 0.855554 | 0.73802  | THBS1/PFN | 4 |
| GO:00060: aminoglycan k    | 1/272 | 115/1867C | 0.816024 | 0.857443 | 0.73965  | ABCC5     | 1 |
| GO:00466: female sex dif   | 1/272 | 115/1867C | 0.816024 | 0.857443 | 0.73965  | CHD7      | 1 |
| GO:00457: positive regul   | 2/272 | 214/1867C | 0.82157  | 0.862758 | 0.744234 | HECW2/LR  | 2 |
| GO:19030: regulation of r  | 2/272 | 214/1867C | 0.82157  | 0.862758 | 0.744234 | RPL23/LRR | 2 |
| GO:00424: ear morphoge     | 1/272 | 118/1867C | 0.823997 | 0.864794 | 0.745991 | CHD7      | 1 |
| GO:00485: camera-type e    | 1/272 | 118/1867C | 0.823997 | 0.864794 | 0.745991 | HIF1A     | 1 |
| GO:00073: determinator     | 1/272 | 119/1867C | 0.826578 | 0.867245 | 0.748105 | HIF1A     | 1 |
| GO:00084: gonad develop    | 2/272 | 217/1867C | 0.827499 | 0.867954 | 0.748717 | NKX3-1/AF | 2 |
| GO:00109: regulation of r  | 4/272 | 394/1867C | 0.829028 | 0.868956 | 0.749581 | PTGS2/B2I | 4 |
| GO:19030: positive regul   | 1/272 | 120/1867C | 0.829121 | 0.868956 | 0.749581 | LRRK2     | 1 |
| GO:00076: visual percept   | 2/272 | 218/1867C | 0.829435 | 0.868956 | 0.749581 | RGR/UNC1  | 2 |
| GO:00160: immunoglobul     | 2/272 | 218/1867C | 0.829435 | 0.868956 | 0.749581 | IL4R/EXOS | 2 |
| GO:00434: macromolecul     | 3/272 | 309/1867C | 0.831006 | 0.870221 | 0.750672 | PCMTD1/T  | 3 |
| GO:00157: organophosph     | 1/272 | 121/1867C | 0.831626 | 0.870221 | 0.750672 | OSBPL8    | 1 |
| GO:00309: endoplasmic r    | 1/272 | 121/1867C | 0.831626 | 0.870221 | 0.750672 | EIF2AK2   | 1 |
| GO:00702: actin-mediate    | 1/272 | 121/1867C | 0.831626 | 0.870221 | 0.750672 | TNNI2     | 1 |
| GO:00062: regulation of l  | 1/272 | 122/1867C | 0.834095 | 0.871774 | 0.752012 | DTX3L     | 1 |
| GO:00169: antibiotic met   | 1/272 | 122/1867C | 0.834095 | 0.871774 | 0.752012 | HAL       | 1 |
| GO:00324: regulation of r  | 1/272 | 122/1867C | 0.834095 | 0.871774 | 0.752012 | LRRK2     | 1 |
| GO:19054: positive regul   | 1/272 | 122/1867C | 0.834095 | 0.871774 | 0.752012 | CDK5R1    | 1 |
| GO:00071: adenylate cycl   | 2/272 | 221/1867C | 0.835129 | 0.872339 | 0.752499 | RGS2/OXEI | 2 |
| GO:00197: B cell mediate   | 2/272 | 221/1867C | 0.835129 | 0.872339 | 0.752499 | IL4R/EXOS | 2 |
| GO:00020: chondrocyte c    | 1/272 | 123/1867C | 0.836528 | 0.873543 | 0.753538 | SULF2     | 1 |
| GO:00509: sensory perce    | 2/272 | 222/1867C | 0.836988 | 0.873766 | 0.75373  | RGR/UNC1  | 2 |
| GO:00451: development      | 2/272 | 223/1867C | 0.838829 | 0.874756 | 0.754584 | NKX3-1/AF | 2 |
| GO:00018: embryonic epi    | 1/272 | 124/1867C | 0.838926 | 0.874756 | 0.754584 | HIF1A     | 1 |
| GO:00192: regulation of s  | 1/272 | 124/1867C | 0.838926 | 0.874756 | 0.754584 | ASAH1     | 1 |
| GO:00512: release of seq   | 1/272 | 124/1867C | 0.838926 | 0.874756 | 0.754584 | CHD7      | 1 |
| GO:00016: osteoblast dif   | 2/272 | 225/1867C | 0.842454 | 0.878176 | 0.757535 | TOB1/HDA  | 2 |
| GO:00487: embryonic ske    | 1/272 | 126/1867C | 0.843616 | 0.87887  | 0.758133 | SULF2     | 1 |
| GO:00512: negative regul   | 1/272 | 126/1867C | 0.843616 | 0.87887  | 0.758133 | CHD7      | 1 |
| GO:00430: camera-type e    | 3/272 | 319/1867C | 0.846687 | 0.88181  | 0.76067  | RAB3GAP1  | 3 |
| GO:00098: determinator     | 1/272 | 128/1867C | 0.84817  | 0.882835 | 0.761553 | HIF1A     | 1 |
| GO:00512: regulation of s  | 1/272 | 128/1867C | 0.84817  | 0.882835 | 0.761553 | CHD7      | 1 |
| GO:00070: chromosome       | 3/272 | 321/1867C | 0.849668 | 0.883594 | 0.762209 | TACC3/HEI | 3 |
| GO:00066: acylglycerol m   | 1/272 | 129/1867C | 0.850397 | 0.883594 | 0.762209 | ACSL1     | 1 |
| GO:00070: cell-cell juncti | 1/272 | 129/1867C | 0.850397 | 0.883594 | 0.762209 | CDH2      | 1 |
| GO:00097: specification c  | 1/272 | 129/1867C | 0.850397 | 0.883594 | 0.762209 | HIF1A     | 1 |
| GO:00180: peptidyl-lysine  | 1/272 | 129/1867C | 0.850397 | 0.883594 | 0.762209 | ARID4A    | 1 |
| GO:19030: negative regul   | 1/272 | 129/1867C | 0.850397 | 0.883594 | 0.762209 | IL4R      | 1 |

|                            |       |           |          |          |          |            |   |
|----------------------------|-------|-----------|----------|----------|----------|------------|---|
| GO:00192: regulation of l  | 4/272 | 410/1867C | 0.851316 | 0.88429  | 0.762808 | PTGS2/ASA  | 4 |
| GO:00066: neutral lipid r  | 1/272 | 130/1867C | 0.852592 | 0.885095 | 0.763503 | ACSL1      | 1 |
| GO:00305: intracellular st | 1/272 | 130/1867C | 0.852592 | 0.885095 | 0.763503 | NKX3-1     | 1 |
| GO:00512: sequestering c   | 1/272 | 131/1867C | 0.854755 | 0.88708  | 0.765216 | CHD7       | 1 |
| GO:00097: hormone-mec      | 2/272 | 233/1867C | 0.856228 | 0.88799  | 0.766001 | NKX3-1/AC  | 2 |
| GO:00487: cardiac muscl    | 2/272 | 233/1867C | 0.856228 | 0.88799  | 0.766001 | RGS2/CHD   | 2 |
| GO:00425: myelination      | 1/272 | 132/1867C | 0.856886 | 0.88799  | 0.766001 | TLR2       | 1 |
| GO:00550: cardiac muscl    | 1/272 | 132/1867C | 0.856886 | 0.88799  | 0.766001 | RGS2       | 1 |
| GO:00721: epithelial tub   | 1/272 | 132/1867C | 0.856886 | 0.88799  | 0.766001 | HIF1A      | 1 |
| GO:00064: translational e  | 1/272 | 133/1867C | 0.858985 | 0.889906 | 0.767653 | ABTB1      | 1 |
| GO:00007: double-strand    | 1/272 | 134/1867C | 0.861055 | 0.890746 | 0.768378 | MCM8       | 1 |
| GO:00029: regulation of f  | 1/272 | 134/1867C | 0.861055 | 0.890746 | 0.768378 | PPP2R3C    | 1 |
| GO:00072: ensheathmen      | 1/272 | 134/1867C | 0.861055 | 0.890746 | 0.768378 | TLR2       | 1 |
| GO:00083: axon ensheat     | 1/272 | 134/1867C | 0.861055 | 0.890746 | 0.768378 | TLR2       | 1 |
| GO:00323: response to e    | 1/272 | 134/1867C | 0.861055 | 0.890746 | 0.768378 | PTGS2      | 1 |
| GO:00091: glycoprotein r   | 4/272 | 419/1867C | 0.862742 | 0.892073 | 0.769523 | SULF2/GOI  | 4 |
| GO:00007: recombination    | 1/272 | 135/1867C | 0.863093 | 0.892073 | 0.769523 | MCM8       | 1 |
| GO:00300: establishment    | 1/272 | 135/1867C | 0.863093 | 0.892073 | 0.769523 | GOLPH3     | 1 |
| GO:00302: lipid modificat  | 2/272 | 238/1867C | 0.86427  | 0.893029 | 0.770347 | SYNJ2/IRS2 | 2 |
| GO:00313: negative regul   | 2/272 | 239/1867C | 0.865829 | 0.894378 | 0.771511 | PPM1B/PS   | 2 |
| GO:00159: nucleobase-cc    | 2/272 | 241/1867C | 0.868897 | 0.897285 | 0.774019 | UPF2/RAE1  | 2 |
| GO:00075: digestion        | 1/272 | 139/1867C | 0.870955 | 0.898887 | 0.775    | PBLD       | 1 |
| GO:00165: histone methy    | 1/272 | 139/1867C | 0.870955 | 0.898887 | 0.775    | ARID4A     | 1 |
| GO:00346: cellular respor  | 1/272 | 140/1867C | 0.872849 | 0.899269 | 0.775729 | EIF2AK2    | 1 |
| GO:00350: regulation of f  | 1/272 | 140/1867C | 0.872849 | 0.899269 | 0.775729 | F2RL1      | 1 |
| GO:00357: sodium ion tra   | 1/272 | 140/1867C | 0.872849 | 0.899269 | 0.775729 | HECW2      | 1 |
| GO:00720: kidney epithel   | 1/272 | 140/1867C | 0.872849 | 0.899269 | 0.775729 | STAT1      | 1 |
| GO:00975: calcium ion tra  | 1/272 | 140/1867C | 0.872849 | 0.899269 | 0.775729 | CHD7       | 1 |
| GO:19033: positive regul   | 1/272 | 140/1867C | 0.872849 | 0.899269 | 0.775729 | LRRK2      | 1 |
