# Supplementary material for: The ceRNA Crosstalk between mRNAs and lncRNAs in Diabetes Myocardial Infarction
Source: Hindawi journal article supplement (doi:10.1155/2022/4283534), 2022-05-09
Supplement: f4 [file 4283534.f4.pdf]

| ID       | Descriptio   | GeneRatio | BgRatio  | pvalue   | p.adjust | qvalue   | geneID     | Count |
|----------|--------------|-----------|----------|----------|----------|----------|------------|-------|
| hsa04064 | NF-kappa I   | 9/146     | 104/8034 | 0.000107 | 0.02536  | 0.023316 | GADD45G/   | 9     |
| hsa04657 | IL-17 signa  | 8/146     | 94/8034  | 0.000292 | 0.034642 | 0.03185  | PTGS2/S1C  | 8     |
| hsa05140 | Leishmani    | 7/146     | 77/8034  | 0.000471 | 0.037211 | 0.034211 | IFNGR1/PT  | 7     |
| hsa05169 | Epstein-Ba   | 11/146    | 201/8034 | 0.00105  | 0.06219  | 0.057176 | GADD45G/   | 11    |
| hsa05152 | Tuberculo    | 10/146    | 180/8034 | 0.001583 | 0.075036 | 0.068987 | IFNGR1/CA  | 10    |
| hsa04931 | Insulin resi | 7/146     | 108/8034 | 0.003426 | 0.122787 | 0.112889 | RPS6KA3/F  | 7     |
| hsa05134 | Legionello   | 5/146     | 57/8034  | 0.003627 | 0.122787 | 0.112889 | CLK4/TLR2  | 5     |
| hsa04668 | TNF signali  | 7/146     | 112/8034 | 0.004192 | 0.124182 | 0.114171 | RPS6KA5/F  | 7     |
| hsa05321 | Inflammati   | 5/146     | 65/8034  | 0.006373 | 0.149957 | 0.137868 | IFNGR1/ST  | 5     |
| hsa04145 | Phagosom     | 8/146     | 152/8034 | 0.006377 | 0.149957 | 0.137868 | THBS1/CLE  | 8     |
| hsa05167 | Kaposi sar   | 9/146     | 189/8034 | 0.007407 | 0.149957 | 0.137868 | GNG10/IFN  | 9     |
| hsa05168 | Herpes sirr  | 17/146    | 491/8034 | 0.007593 | 0.149957 | 0.137868 | IFNGR1/ST  | 17    |
| hsa04380 | Osteoclast   | 7/146     | 128/8034 | 0.00861  | 0.156967 | 0.144313 | SIRPB1/IFN | 7     |
| hsa04115 | p53 signali  | 5/146     | 73/8034  | 0.010329 | 0.16319  | 0.150035 | GADD45G/   | 5     |
| hsa04620 | Toll-like re | 6/146     | 104/8034 | 0.011478 | 0.16319  | 0.150035 | STAT1/LY9  | 6     |
| hsa04625 | C-type lect  | 6/146     | 104/8034 | 0.011478 | 0.16319  | 0.150035 | CLEC4D/P1  | 6     |
| hsa05164 | Influenza A  | 8/146     | 170/8034 | 0.012142 | 0.16319  | 0.150035 | IFNGR1/ST  | 8     |
| hsa05132 | Salmonella   | 9/146     | 206/8034 | 0.01262  | 0.16319  | 0.150035 | TXN/PFN2,  | 9     |
| hsa04659 | Th17 cell d  | 6/146     | 107/8034 | 0.013083 | 0.16319  | 0.150035 | IFNGR1/ST  | 6     |
| hsa05235 | PD-L1 expr   | 5/146     | 89/8034  | 0.022699 | 0.268981 | 0.247297 | IFNGR1/ST  | 5     |
| hsa03010 | Ribosome     | 7/146     | 158/8034 | 0.024856 | 0.280515 | 0.257902 | RPS28/RPS  | 7     |
| hsa05215 | Prostate c   | 5/146     | 97/8034  | 0.031448 | 0.335075 | 0.308064 | PLAU/NKX   | 5     |
| hsa04640 | Hematopo     | 5/146     | 99/8034  | 0.033924 | 0.335075 | 0.308064 | CSF2RA/M   | 5     |
| hsa05211 | Renal cell   | 4/146     | 69/8034  | 0.03644  | 0.335075 | 0.308064 | PAK2/RAP   | 4     |
| hsa04210 | Apoptosis    | 6/146     | 136/8034 | 0.037273 | 0.335075 | 0.308064 | GADD45G/   | 6     |
| hsa05219 | Bladder ca   | 3/146     | 41/8034  | 0.037914 | 0.335075 | 0.308064 | RPS6KA5/1  | 3     |
| hsa04910 | Insulin sigr | 6/146     | 137/8034 | 0.038419 | 0.335075 | 0.308064 | RAPGEF1/I  | 6     |
| hsa05162 | Measles      | 6/146     | 138/8034 | 0.039587 | 0.335075 | 0.308064 | STAT1/EIF  | 6     |
| hsa04010 | MAPK sign    | 10/146    | 294/8034 | 0.041361 | 0.338019 | 0.31077  | GADD45G/   | 10    |
| hsa04621 | NOD-like r   | 7/146     | 181/8034 | 0.04664  | 0.368457 | 0.338755 | TXN/CAMF   | 7     |
| hsa03050 | Proteasom    | 3/146     | 46/8034  | 0.050599 | 0.374749 | 0.344539 | PSMD12/P   | 3     |
| hsa04930 | Type II dial | 3/146     | 46/8034  | 0.050599 | 0.374749 | 0.344539 | CACNA1E/   | 3     |
| hsa05145 | Toxoplasm    | 5/146     | 112/8034 | 0.052938 | 0.380191 | 0.349542 | IFNGR1/ST  | 5     |
| hsa00770 | Pantothen    | 2/146     | 21/8034  | 0.05498  | 0.383246 | 0.352351 | UPB1/VNN   | 2     |
| hsa05144 | Malaria      | 3/146     | 50/8034  | 0.062042 | 0.407304 | 0.37447  | THBS1/TLF  | 3     |
| hsa05160 | Hepatitis C  | 6/146     | 155/8034 | 0.062945 | 0.407304 | 0.37447  | STAT1/IFIT | 6     |
| hsa04614 | Renin-angi   | 2/146     | 23/8034  | 0.064709 | 0.407304 | 0.37447  | MME/ANP    | 2     |
| hsa04722 | Neurotrop    | 5/146     | 119/8034 | 0.065306 | 0.407304 | 0.37447  | RPS6KA3/F  | 5     |
| hsa04152 | AMPK sign    | 5/146     | 120/8034 | 0.067195 | 0.408339 | 0.375421 | PPP2R3A/I  | 5     |
| hsa05131 | Shigellosis  | 8/146     | 242/8034 | 0.073476 | 0.430725 | 0.396003 | RPS6KA5/L  | 8     |
| hsa05161 | Hepatitis B  | 6/146     | 162/8034 | 0.074514 | 0.430725 | 0.396003 | STAT1/CRE  | 6     |
| hsa05205 | Proteoglyc   | 7/146     | 205/8034 | 0.079567 | 0.447649 | 0.411562 | PLAU/THB   | 7     |
| hsa04658 | Th1 and Th   | 4/146     | 92/8034  | 0.086111 | 0.447649 | 0.411562 | IFNGR1/ST  | 4     |
| hsa05222 | Small cell   | 4/146     | 92/8034  | 0.086111 | 0.447649 | 0.411562 | GADD45G/   | 4     |
| hsa04060 | Cytokine-c   | 9/146     | 294/8034 | 0.086958 | 0.447649 | 0.411562 | CSF2RA/IFI | 9     |
| hsa00524 | Neomycin,    | 1/146     | 5/8034   | 0.087642 | 0.447649 | 0.411562 | HK2        | 1     |
| hsa05323 | Rheumato     | 4/146     | 93/8034  | 0.088774 | 0.447649 | 0.411562 | TNFSF13B/  | 4     |

|          |              |        |          |          |          |          |            |    |
|----------|--------------|--------|----------|----------|----------|----------|------------|----|
| hsa05170 | Human imi    | 7/146  | 212/8034 | 0.09121  | 0.45035  | 0.414046 | GNG10/PA   | 7  |
| hsa05200 | Pathways i   | 14/146 | 531/8034 | 0.101878 | 0.486241 | 0.447043 | GADD45G/   | 14 |
| hsa00410 | beta-Alanii  | 2/146  | 30/8034  | 0.102582 | 0.486241 | 0.447043 | UPB1/ABA   | 2  |
| hsa01523 | Antifolate   | 2/146  | 31/8034  | 0.108401 | 0.503744 | 0.463136 | ABCC5/FO   | 2  |
| hsa05142 | Chagas dis   | 4/146  | 102/8034 | 0.114478 | 0.51532  | 0.473779 | IFNGR1/FA  | 4  |
| hsa05163 | Human cyt    | 7/146  | 225/8034 | 0.11524  | 0.51532  | 0.473779 | GNG10/PT   | 7  |
| hsa00051 | Fructose a   | 2/146  | 33/8034  | 0.120289 | 0.527936 | 0.485377 | PFKFB2/HK  | 2  |
| hsa00640 | Propanoat    | 2/146  | 34/8034  | 0.12635  | 0.538807 | 0.495372 | DLD/ABAT   | 2  |
| hsa04920 | Adipocytol   | 3/146  | 69/8034  | 0.130118 | 0.538807 | 0.495372 | ACSL1/IRS  | 3  |
| hsa00760 | Nicotinate   | 2/146  | 35/8034  | 0.132482 | 0.538807 | 0.495372 | NT5C2/BS1  | 2  |
| hsa05010 | Alzheimer    | 10/146 | 369/8034 | 0.133951 | 0.538807 | 0.495372 | PTGS2/MM   | 10 |
| hsa04622 | RIG-I-like r | 3/146  | 70/8034  | 0.134238 | 0.538807 | 0.495372 | TRIM25/FA  | 3  |
| hsa05130 | Pathogeni    | 6/146  | 192/8034 | 0.136681 | 0.538807 | 0.495372 | PAK2/FADI  | 6  |
| hsa00500 | Starch and   | 2/146  | 36/8034  | 0.13868  | 0.538807 | 0.495372 | PYGL/HK2   | 2  |
| hsa05143 | African try  | 2/146  | 37/8034  | 0.144941 | 0.545255 | 0.5013   | F2RL1/IL1  | 2  |
| hsa05216 | Thyroid ca   | 2/146  | 37/8034  | 0.144941 | 0.545255 | 0.5013   | GADD45G/   | 2  |
| hsa05214 | Glioma       | 3/146  | 75/8034  | 0.155484 | 0.574021 | 0.527748 | GADD45G/   | 3  |
| hsa05212 | Pancreatic   | 3/146  | 76/8034  | 0.159854 | 0.574021 | 0.527748 | GADD45G/   | 3  |
| hsa05220 | Chronic m    | 3/146  | 76/8034  | 0.159854 | 0.574021 | 0.527748 | GADD45G/   | 3  |
| hsa04217 | Necroptos    | 5/146  | 159/8034 | 0.163024 | 0.576669 | 0.530182 | IFNGR1/ST  | 5  |
| hsa04630 | JAK-STAT s   | 5/146  | 162/8034 | 0.171986 | 0.59942  | 0.551099 | CSF2RA/IFI | 5  |
| hsa04940 | Type I diab  | 2/146  | 43/8034  | 0.183585 | 0.630575 | 0.579743 | ICA1/PTPR  | 2  |
| hsa02010 | ABC trans    | 2/146  | 45/8034  | 0.196786 | 0.666263 | 0.612553 | ABCC5/TAI  | 2  |
| hsa05206 | MicroRNA:    | 8/146  | 310/8034 | 0.202145 | 0.674765 | 0.62037  | PLAU/RPS   | 8  |
| hsa04926 | Relaxin sig  | 4/146  | 129/8034 | 0.207327 | 0.682451 | 0.627436 | GNG10/CR   | 4  |
| hsa00280 | Valine, leu  | 2/146  | 48/8034  | 0.216794 | 0.700673 | 0.644189 | DLD/ABAT   | 2  |
| hsa04728 | Dopamine     | 4/146  | 132/8034 | 0.218775 | 0.700673 | 0.644189 | GNG10/PP   | 4  |
| hsa05030 | Cocaine ac   | 2/146  | 49/8034  | 0.223505 | 0.706276 | 0.649341 | CREB5/CDI  | 2  |
| hsa03015 | mRNA sur     | 3/146  | 91/8034  | 0.229218 | 0.714799 | 0.657177 | PPP2R3A/I  | 3  |
| hsa05165 | Human pa     | 8/146  | 330/8034 | 0.251319 | 0.763534 | 0.701984 | PPP2R3A/I  | 8  |
| hsa05150 | Staphylocc   | 3/146  | 96/8034  | 0.253511 | 0.763534 | 0.701984 | CAMP/FCC   | 3  |
| hsa00730 | Thiamine r   | 1/146  | 16/8034  | 0.254511 | 0.763534 | 0.701984 | ALPP       | 1  |
| hsa04062 | Chemokin     | 5/146  | 189/8034 | 0.259973 | 0.77017  | 0.708084 | GNG10/ST   | 5  |
| hsa05202 | Transcripti  | 5/146  | 192/8034 | 0.270387 | 0.78008  | 0.717195 | GADD45G/   | 5  |
| hsa04923 | Regulation   | 2/146  | 56/8034  | 0.270791 | 0.78008  | 0.717195 | PTGS2/IRS  | 2  |
| hsa00240 | Pyrimidine   | 2/146  | 57/8034  | 0.277559 | 0.78008  | 0.717195 | UPB1/NT5   | 2  |
| hsa01212 | Fatty acid   | 12/146 | 57/8034  | 0.277559 | 0.78008  | 0.717195 | ACSL1/HSL  | 2  |
| hsa00061 | Fatty acid   | 11/146 | 18/8034  | 0.281415 | 0.78008  | 0.717195 | ACSL1      | 1  |
| hsa05213 | Endometri    | 2/146  | 58/8034  | 0.284325 | 0.78008  | 0.717195 | GADD45G/   | 2  |
| hsa04261 | Adrenergic   | 4/146  | 149/8034 | 0.286358 | 0.78008  | 0.717195 | PPP2R3A/I  | 4  |
| hsa05012 | Parkinson    | 6/146  | 249/8034 | 0.299229 | 0.799963 | 0.735476 | TXN/PSMC   | 6  |
| hsa04510 | Focal adhe   | 5/146  | 201/8034 | 0.302137 | 0.799963 | 0.735476 | PAK2/RAP   | 5  |
| hsa04921 | Oxytocin s   | 4/146  | 154/8034 | 0.306847 | 0.799963 | 0.735476 | PTGS2/CAI  | 4  |
| hsa04066 | HIF-1 sign   | 3/146  | 109/8034 | 0.318006 | 0.799963 | 0.735476 | IFNGR1/HK  | 3  |
| hsa00590 | Arachidoni   | 2/146  | 63/8034  | 0.318027 | 0.799963 | 0.735476 | PTGS2/CYF  | 2  |
| hsa04623 | Cytosolic    | 12/146 | 63/8034  | 0.318027 | 0.799963 | 0.735476 | NFKBIA/IL  | 2  |
| hsa05217 | Basal cell   | 2/146  | 63/8034  | 0.318027 | 0.799963 | 0.735476 | GADD45G/   | 2  |
| hsa05016 | Huntingtor   | 7/146  | 306/8034 | 0.321461 | 0.799963 | 0.735476 | POLR2J/PS  | 7  |

|          |              |          |          |          |          |          |           |   |
|----------|--------------|----------|----------|----------|----------|----------|-----------|---|
| hsa00340 | Histidine n  | 1/146    | 22/8034  | 0.332363 | 0.799963 | 0.735476 | HAL       | 1 |
| hsa04670 | Leukocyte    | 3/146    | 113/8034 | 0.337997 | 0.799963 | 0.735476 | RAP1A/MM  | 3 |
| hsa00010 | Glycolysis   | ,2/146   | 67/8034  | 0.344732 | 0.799963 | 0.735476 | DLD/HK2   | 2 |
| hsa04720 | Long-term    | 2/146    | 67/8034  | 0.344732 | 0.799963 | 0.735476 | RPS6KA3/F | 2 |
| hsa04810 | Regulation   | 5/146    | 214/8034 | 0.348921 | 0.799963 | 0.735476 | PAK2/PFN: | 5 |
| hsa04137 | Mitophagy    | 2/146    | 68/8034  | 0.351359 | 0.799963 | 0.735476 | USP15/HIF | 2 |
| hsa05223 | Non-small    | 2/146    | 68/8034  | 0.351359 | 0.799963 | 0.735476 | GADD45G/  | 2 |
| hsa04977 | Vitamin di   | 1/146    | 24/8034  | 0.356475 | 0.799963 | 0.735476 | LMBRD1    | 1 |
| hsa04022 | cGMP-PKG     | 4/146    | 167/8034 | 0.360673 | 0.799963 | 0.735476 | RGS2/CREI | 4 |
| hsa04141 | Protein pr   | 4/146    | 167/8034 | 0.360673 | 0.799963 | 0.735476 | UBE2D3/EI | 4 |
| hsa05120 | Epithelial   | c 2/146  | 70/8034  | 0.364543 | 0.799963 | 0.735476 | NFKBIA/CX | 2 |
| hsa05230 | Central car  | 2/146    | 70/8034  | 0.364543 | 0.799963 | 0.735476 | HK2/HIF1A | 2 |
| hsa04071 | Sphingolip   | 3/146    | 119/8034 | 0.367916 | 0.799963 | 0.735476 | PPP2R3A/I | 3 |
| hsa04935 | Growth ho    | 3/146    | 119/8034 | 0.367916 | 0.799963 | 0.735476 | STAT1/CRE | 3 |
| hsa05218 | Melanoma     | 2/146    | 72/8034  | 0.377626 | 0.80352  | 0.738746 | GADD45G/  | 2 |
| hsa04919 | Thyroid ho   | 3/146    | 121/8034 | 0.377845 | 0.80352  | 0.738746 | PFKFB2/ST | 3 |
| hsa00790 | Folate bios  | 1/146    | 26/8034  | 0.379722 | 0.80352  | 0.738746 | ALPP      | 1 |
| hsa05100 | Bacterial ir | 2/146    | 73/8034  | 0.384127 | 0.805646 | 0.740701 | CLTCL1/AR | 2 |
| hsa00062 | Fatty acid   | 1/146    | 27/8034  | 0.391031 | 0.805864 | 0.740901 | HSD17B12  | 1 |
| hsa01040 | Biosynthes   | 1/146    | 27/8034  | 0.391031 | 0.805864 | 0.740901 | HSD17B12  | 1 |
| hsa00650 | Butanoate    | 1/146    | 28/8034  | 0.402135 | 0.815972 | 0.750194 | ABAT      | 1 |
| hsa04714 | Thermogel    | 5/146    | 231/8034 | 0.410621 | 0.815972 | 0.750194 | RPS6KA3// | 5 |
| hsa04142 | Lysosome     | 3/146    | 128/8034 | 0.412319 | 0.815972 | 0.750194 | ASAH1/CL  | 3 |
| hsa04612 | Antigen pr   | 2/146    | 78/8034  | 0.416174 | 0.815972 | 0.750194 | B2M/TAP2  | 2 |
| hsa05135 | Yersinia in  | 3/146    | 130/8034 | 0.422068 | 0.815972 | 0.750194 | RPS6KA3/M | 3 |
| hsa03018 | RNA degra    | 2/146    | 79/8034  | 0.422485 | 0.815972 | 0.750194 | TOB1/EXO  | 2 |
| hsa00020 | Citrate cyc  | 1/146    | 30/8034  | 0.423743 | 0.815972 | 0.750194 | DLD       | 1 |
| hsa00630 | Glyoxylate   | 1/146    | 30/8034  | 0.423743 | 0.815972 | 0.750194 | DLD       | 1 |
| hsa04068 | FoxO sign    | 3/146    | 131/8034 | 0.426922 | 0.815972 | 0.750194 | GADD45G/  | 3 |
| hsa00052 | Galactose    | 1/146    | 31/8034  | 0.434255 | 0.816813 | 0.750967 | HK2       | 1 |
| hsa03020 | RNA polyr    | 1/146    | 31/8034  | 0.434255 | 0.816813 | 0.750967 | POLR2J    | 1 |
| hsa04215 | Apoptosis    | 1/146    | 32/8034  | 0.444576 | 0.829641 | 0.762762 | FADD      | 1 |
| hsa04140 | Autophagy    | 3/146    | 137/8034 | 0.455739 | 0.836049 | 0.768653 | EIF2AK4/H | 3 |
| hsa04610 | Compleme     | 2/146    | 85/8034  | 0.459596 | 0.836049 | 0.768653 | PLAU/PLAI | 2 |
| hsa04151 | PI3K-Akt     | si 7/146 | 354/8034 | 0.465037 | 0.836049 | 0.768653 | GNG10/PP  | 7 |
| hsa05418 | Fluid shear  | 3/146    | 139/8034 | 0.465213 | 0.836049 | 0.768653 | TXN/MMP   | 3 |
| hsa05210 | Colorectal   | 2/146    | 86/8034  | 0.465648 | 0.836049 | 0.768653 | GADD45G/  | 2 |
| hsa04540 | Gap juncti   | 2/146    | 88/8034  | 0.477632 | 0.840468 | 0.772716 | MAP3K2/T  | 2 |
| hsa04211 | Longevity    | 1/2/146  | 89/8034  | 0.483563 | 0.840468 | 0.772716 | CREB5/IRS | 2 |
| hsa04727 | GABAergic    | 2/146    | 89/8034  | 0.483563 | 0.840468 | 0.772716 | GNG10/AB  | 2 |
| hsa00250 | Alanine, as  | 1/146    | 36/8034  | 0.484023 | 0.840468 | 0.772716 | ABAT      | 1 |
| hsa05032 | Morphine     | 2/146    | 91/8034  | 0.4953   | 0.840468 | 0.772716 | GNG10/PC  | 2 |
| hsa05340 | Primary im   | 1/146    | 38/8034  | 0.50269  | 0.840468 | 0.772716 | TAP2      | 1 |
| hsa04666 | Fc gamma     | 2/146    | 93/8034  | 0.506869 | 0.840468 | 0.772716 | FCGR3B/AI | 2 |
| hsa04970 | Salivary se  | 2/146    | 93/8034  | 0.506869 | 0.840468 | 0.772716 | CAMP/BST  | 2 |
| hsa05203 | Viral carc   | 4/146    | 204/8034 | 0.510575 | 0.840468 | 0.772716 | EIF2AK2/C | 4 |
| hsa04932 | Non-alcohol  | 3/146    | 149/8034 | 0.511451 | 0.840468 | 0.772716 | IRS2/MLX/ | 3 |
| hsa00620 | Pyruvate n   | 1/146    | 39/8034  | 0.51177  | 0.840468 | 0.772716 | DLD       | 1 |

|          |                    |          |          |          |          |           |   |
|----------|--------------------|----------|----------|----------|----------|-----------|---|
| hsa04974 | Protein dig 2/146  | 95/8034  | 0.518266 | 0.840468 | 0.772716 | MME/SLC3  | 2 |
| hsa00260 | Glycine, se 1/146  | 40/8034  | 0.520686 | 0.840468 | 0.772716 | DLD       | 1 |
| hsa04216 | Ferroptosi 1/146   | 41/8034  | 0.52944  | 0.840468 | 0.772716 | ACSL1     | 1 |
| hsa04713 | Circadian ε 2/146  | 97/8034  | 0.529488 | 0.840468 | 0.772716 | GNG10/RP  | 2 |
| hsa04015 | Rap1 signa 4/146   | 210/8034 | 0.533545 | 0.840468 | 0.772716 | RAPGEF1/  | 4 |
| hsa04925 | Aldosteror 2/146   | 98/8034  | 0.535033 | 0.840468 | 0.772716 | CAMK1D/C  | 2 |
| hsa00380 | Tryptopha 1/146    | 42/8034  | 0.538035 | 0.840468 | 0.772716 | DLD       | 1 |
| hsa04934 | Cushing sy 3/146   | 155/8034 | 0.538178 | 0.840468 | 0.772716 | CREB5/RAI | 3 |
| hsa04061 | Viral prote 2/146  | 100/8034 | 0.545989 | 0.840468 | 0.772716 | IL18/CXCL | 2 |
| hsa00071 | Fatty acid i 1/146 | 44/8034  | 0.554761 | 0.840468 | 0.772716 | ACSL1     | 1 |
| hsa04962 | Vasopressi 1/146   | 44/8034  | 0.554761 | 0.840468 | 0.772716 | CREB5     | 1 |
| hsa04024 | cAMP sign 4/146    | 216/8034 | 0.555979 | 0.840468 | 0.772716 | CREB5/PPF | 4 |
| hsa04972 | Pancreatic 2/146   | 102/8034 | 0.556766 | 0.840468 | 0.772716 | RAP1A/BS  | 2 |
| hsa05146 | Amoebiasi 2/146    | 102/8034 | 0.556766 | 0.840468 | 0.772716 | TLR2/CXCL | 2 |
| hsa03022 | Basal trans 1/146  | 45/8034  | 0.562897 | 0.844345 | 0.77628  | TAF15     | 1 |
| hsa04660 | T cell rece 2/146  | 104/8034 | 0.567361 | 0.845689 | 0.777516 | PAK2/NFKI | 2 |
| hsa04922 | Glucagon s 2/146   | 106/8034 | 0.577775 | 0.846658 | 0.778406 | PYGL/CREE | 2 |
| hsa00600 | Sphingolip 1/146   | 47/8034  | 0.578728 | 0.846658 | 0.778406 | ASAH1     | 1 |
| hsa04973 | Carbohydr 1/146    | 47/8034  | 0.578728 | 0.846658 | 0.778406 | HK2       | 1 |
| hsa00520 | Amino sug 1/146    | 48/8034  | 0.586429 | 0.85266  | 0.783925 | HK2       | 1 |
| hsa04672 | Intestinal i 1/146 | 49/8034  | 0.59399  | 0.858387 | 0.78919  | TNFSF13B  | 1 |
| hsa04913 | Ovarian str 1/146  | 51/8034  | 0.608702 | 0.873513 | 0.803096 | PTGS2     | 1 |
| hsa04725 | Cholinergic 2/146  | 113/8034 | 0.612781 | 0.873513 | 0.803096 | GNG10/CR  | 2 |
| hsa04726 | Serotoner 2/146    | 115/8034 | 0.62237  | 0.873513 | 0.803096 | GNG10/PT  | 2 |
| hsa04330 | Notch sign 1/146   | 53/8034  | 0.622885 | 0.873513 | 0.803096 | DTX3L     | 1 |
| hsa04961 | Endocrine 1/146    | 53/8034  | 0.622885 | 0.873513 | 0.803096 | CLTCL1    | 1 |
| hsa01200 | Carbon me 2/146    | 117/8034 | 0.631777 | 0.880772 | 0.80977  | DLD/HK2   | 2 |
| hsa03013 | RNA trans 3/146    | 180/8034 | 0.640012 | 0.884786 | 0.813461 | TACC3/UP  | 3 |
| hsa00480 | Glutathion 1/146   | 57/8034  | 0.649737 | 0.884786 | 0.813461 | ANPEP     | 1 |
| hsa04370 | VEGF sign 1/146    | 59/8034  | 0.662442 | 0.884786 | 0.813461 | PTGS2     | 1 |
| hsa04110 | Cell cycle 2/146   | 124/8034 | 0.663273 | 0.884786 | 0.813461 | GADD45G/  | 2 |
| hsa04611 | Platelet ac 2/146  | 124/8034 | 0.663273 | 0.884786 | 0.813461 | PPP1R12A, | 2 |
| hsa04144 | Endocytosi 4/146   | 248/8034 | 0.665146 | 0.884786 | 0.813461 | CLTCL1/FC | 4 |
| hsa05034 | Alcoholism 3/146   | 187/8034 | 0.66557  | 0.884786 | 0.813461 | GNG10/CR  | 3 |
| hsa00140 | Steroid hor 1/146  | 61/8034  | 0.674689 | 0.884786 | 0.813461 | HSD17B12  | 1 |
| hsa00310 | Lysine deg 1/146   | 61/8034  | 0.674689 | 0.884786 | 0.813461 | DLD       | 1 |
| hsa00561 | Glycerolipi 1/146  | 61/8034  | 0.674689 | 0.884786 | 0.813461 | MBOAT1    | 1 |
| hsa04213 | Longevity i 1/146  | 62/8034  | 0.680646 | 0.884786 | 0.813461 | IRS2      | 1 |
| hsa00230 | Purine me 2/146    | 130/8034 | 0.688529 | 0.884786 | 0.813461 | PDE7A/NT  | 2 |
| hsa04650 | Natural kill 2/146 | 131/8034 | 0.692585 | 0.884786 | 0.813461 | IFNGR1/FC | 2 |
| hsa04020 | Calcium sig 3/146  | 196/8034 | 0.696476 | 0.884786 | 0.813461 | CACNA1E/  | 3 |
| hsa04927 | Cortisol sy 1/146  | 65/8034  | 0.697874 | 0.884786 | 0.813461 | CREB5     | 1 |
| hsa05017 | Spinocere 2/146    | 133/8034 | 0.700567 | 0.884786 | 0.813461 | PSMD12/P  | 2 |
| hsa04664 | Fc epsilon 1/146   | 68/8034  | 0.71418  | 0.884786 | 0.813461 | ALOX5AP   | 1 |
| hsa04371 | Apelin sign 2/146  | 137/8034 | 0.71602  | 0.884786 | 0.813461 | GNG10/HE  | 2 |
| hsa05031 | Amphetarr 1/146    | 69/8034  | 0.719418 | 0.884786 | 0.813461 | CREB5     | 1 |
| hsa04915 | Estrogen si 2/146  | 138/8034 | 0.719778 | 0.884786 | 0.813461 | CREB5/MM  | 2 |
| hsa04917 | Prolactin s 1/146  | 70/8034  | 0.724561 | 0.884786 | 0.813461 | STAT1     | 1 |

|          |                    |          |          |          |          |           |   |
|----------|--------------------|----------|----------|----------|----------|-----------|---|
| hsa00562 | Inositol ph 1/146  | 73/8034  | 0.739436 | 0.884786 | 0.813461 | SYNJ2     | 1 |
| hsa01524 | Platinum d 1/146   | 73/8034  | 0.739436 | 0.884786 | 0.813461 | FADD      | 1 |
| hsa04918 | Thyroid ho 1/146   | 75/8034  | 0.748906 | 0.884786 | 0.813461 | CREB5     | 1 |
| hsa05224 | Breast can 2/146   | 147/8034 | 0.751758 | 0.884786 | 0.813461 | GADD45G/  | 2 |
| hsa05133 | Pertussis 1/146    | 76/8034  | 0.753512 | 0.884786 | 0.813461 | LY96      | 1 |
| hsa04514 | Cell adhesi 2/146  | 148/8034 | 0.755112 | 0.884786 | 0.813461 | NTNG2/CC  | 2 |
| hsa04723 | Retrogradε 2/146   | 148/8034 | 0.755112 | 0.884786 | 0.813461 | GNG10/PT  | 2 |
| hsa03320 | PPAR signε 1/146   | 77/8034  | 0.758034 | 0.884786 | 0.813461 | ACSL1     | 1 |
| hsa05412 | Arrhythmc 1/146    | 77/8034  | 0.758034 | 0.884786 | 0.813461 | CDH2      | 1 |
| hsa03040 | Spliceoson 2/146   | 149/8034 | 0.758427 | 0.884786 | 0.813461 | RBMXL1/R  | 2 |
| hsa05226 | Gastric car 2/146  | 149/8034 | 0.758427 | 0.884786 | 0.813461 | GADD45G/  | 2 |
| hsa04721 | Synaptic vε 1/146  | 78/8034  | 0.762474 | 0.884786 | 0.813461 | CLTCL1    | 1 |
| hsa05166 | Human T-c 3/146    | 219/8034 | 0.765632 | 0.884786 | 0.813461 | B2M/CREB  | 3 |
| hsa00983 | Drug meta 1/146    | 79/8034  | 0.766833 | 0.884786 | 0.813461 | UPB1      | 1 |
| hsa04662 | B cell recej 1/146 | 82/8034  | 0.779438 | 0.884786 | 0.813461 | NFKBIA    | 1 |
| hsa05204 | Chemical c 1/146   | 82/8034  | 0.779438 | 0.884786 | 0.813461 | PTGS2     | 1 |
| hsa04218 | Cellular sei 2/146 | 156/8034 | 0.78057  | 0.884786 | 0.813461 | GADD45G/  | 2 |
| hsa04146 | Peroxisom 1/146    | 83/8034  | 0.783488 | 0.884786 | 0.813461 | ACSL1     | 1 |
| hsa04012 | ErbB signal 1/146  | 85/8034  | 0.791367 | 0.884786 | 0.813461 | PAK2      | 1 |
| hsa04911 | Insulin sec 1/146  | 86/8034  | 0.795199 | 0.884786 | 0.813461 | CREB5     | 1 |
| hsa04530 | Tight junct 2/146  | 161/8034 | 0.795287 | 0.884786 | 0.813461 | RAP1A/TU  | 2 |
| hsa04014 | Ras signalii 3/146 | 232/8034 | 0.798761 | 0.884786 | 0.813461 | GNG10/PA  | 3 |
| hsa04260 | Cardiac mt 1/146   | 87/8034  | 0.798961 | 0.884786 | 0.813461 | COX7B     | 1 |
| hsa04512 | ECM-receç 1/146    | 88/8034  | 0.802654 | 0.884786 | 0.813461 | THBS1     | 1 |
| hsa05225 | Hepatocell 2/146   | 168/8034 | 0.814434 | 0.886962 | 0.815461 | GADD45G/  | 2 |
| hsa04912 | GnRH sign: 1/146   | 93/8034  | 0.820134 | 0.886962 | 0.815461 | MAP3K2    | 1 |
| hsa04350 | TGF-beta s 1/146   | 94/8034  | 0.823441 | 0.886962 | 0.815461 | THBS1     | 1 |
| hsa04070 | Phosphatic 1/146   | 97/8034  | 0.833004 | 0.886962 | 0.815461 | SYNJ2     | 1 |
| hsa00564 | Glycerophi 1/146   | 98/8034  | 0.836076 | 0.886962 | 0.815461 | MBOAT1    | 1 |
| hsa01522 | Endocrine 1/146    | 98/8034  | 0.836076 | 0.886962 | 0.815461 | MMP9      | 1 |
| hsa05231 | Choline mε 1/146   | 98/8034  | 0.836076 | 0.886962 | 0.815461 | HIF1A     | 1 |
| hsa04914 | Progesterç 1/146   | 99/8034  | 0.839092 | 0.886962 | 0.815461 | RPS6KA3   | 1 |
| hsa04750 | Inflammat 1/146    | 100/8034 | 0.842052 | 0.886962 | 0.815461 | F2RL1     | 1 |
| hsa04933 | AGE-RAGE 1/146     | 100/8034 | 0.842052 | 0.886962 | 0.815461 | STAT1     | 1 |
| hsa04360 | Axon guidε 2/146   | 181/8034 | 0.845814 | 0.886982 | 0.81548  | PAK2/NTN  | 2 |
| hsa04928 | Parathyroi 1/146   | 106/8034 | 0.858714 | 0.896542 | 0.82427  | CREB5     | 1 |
| hsa04724 | Glutamate 1/146    | 114/8034 | 0.878244 | 0.912911 | 0.839319 | GNG10     | 1 |
| hsa04114 | Oocyte me 1/146    | 128/8034 | 0.906186 | 0.937843 | 0.862241 | RPS6KA3   | 1 |
| hsa00190 | Oxidative ç 1/146  | 133/8034 | 0.914536 | 0.938997 | 0.863302 | COX7B     | 1 |
| hsa04270 | Vascular sr 1/146  | 135/8034 | 0.917666 | 0.938997 | 0.863302 | PPP1R12A  | 1 |
| hsa05322 | Systemic lt 1/146  | 136/8034 | 0.919187 | 0.938997 | 0.863302 | FCGR3B    | 1 |
| hsa04120 | Ubiquitin r 1/146  | 140/8034 | 0.925    | 0.94088  | 0.865033 | UBE2D3    | 1 |
| hsa04150 | mTOR sign 1/146    | 155/8034 | 0.943332 | 0.954518 | 0.877571 | RPS6KA3   | 1 |
| hsa04310 | Wnt signal 1/146   | 160/8034 | 0.948393 | 0.954518 | 0.877571 | CHD8      | 1 |
| hsa04080 | Neuroactiv 3/146   | 340/8034 | 0.95049  | 0.954518 | 0.877571 | F2RL1/LTB | 3 |
| hsa04740 | Olfactory t 1/146  | 448/8034 | 0.999787 | 0.999787 | 0.919192 | RGS2      | 1 |
