# Supplementary material for: The ceRNA Crosstalk between mRNAs and lncRNAs in Diabetes Myocardial Infarction
Source: Hindawi journal article supplement (doi:10.1155/2022/4283534), 2022-05-09
Supplement: f5 [file 4283534.f5.pdf]

| Probe_Set_ID | Symbol    | Protein_Pr | Array_Add | Probe_Typ | Probe_Sta | SEQUENCE                  | Chromoso | Probe_Chr |
|--------------|-----------|------------|-----------|-----------|-----------|---------------------------|----------|-----------|
| ILMN_1653412 | RAXL1     | NP_11614   | 3830382   | S         | 2182      | TTGAGACC                  | 19       | -         |
| ILMN_1654320 | LOC64425  | XP_93429   | 940386    | S         | 259       | AAGTGGA                   | 13       | -         |
| ILMN_1656233 | LOC64386  | XP_93860   | 3610465   | I         | 3261      | GGAGCCC                   | 7        | +         |
| ILMN_1656393 | PPP2R3A   | NP_87162   | 540041    | A         | 4082      | CACTCCAG                  | 3        | +         |
| ILMN_1658921 | LOC64485  | XP_93931   | 2360053   | I         | 879       | CCCAGCGC                  | 1        | +         |
| ILMN_1659878 | PAK2      | XP_94160   | 6110608   | I         | 1688      | AGAGGTGCGGTTCGATCGGCCGAAG |          |           |
| ILMN_1660942 | LOC65335  | XP_93940   | 4540653   | I         | 2039      | AAGTAGAC                  | 16       | -         |
| ILMN_1672661 | SP110     | NP_00450   | 70338     | A         | 1274      | GGTGGAT                   | 2        | -         |
| ILMN_1675258 | LOC44126  | NP_00101   | 3840102   | S         | 2048      | CAGGCCCC                  | 7        | -         |
| ILMN_1676665 | CUEDC1    | NP_06041   | 2680725   | S         | 2114      | GCAGCAG                   | 17       | -         |
| ILMN_1677262 | LOC731706 |            | 4180564   | S         | 466       | AGCCTGAGCTGCTGGAAACTATTC  |          |           |
| ILMN_1677843 | RAB24     | NP_57013   | 4730156   | A         | 1124      | TGGAACGGAGACAGCATTGGGCT   |          |           |
| ILMN_1678757 | BCYRN1    |            | 2450154   | S         | 57        | GGAGGAT                   | 2        | +         |
| ILMN_1680279 | USP49     | NP_06103   | 7320088   | S         | 2818      | TCCTAGCT                  | 6        | -         |
| ILMN_1685628 | C15orf51  |            | 5910131   | I         | 3782      | AGCTCACACCACTGCAGTCCAGCC  |          |           |
| ILMN_1688490 | PTP4A2    | XP_95000   | 5360603   | I         | 2364      | ACTCTGGCCTGGGTGATAGAGCG   |          |           |
| ILMN_1688666 | HIST1H2B  | NP_00351   | 5720433   | S         | 352       | GCCGTAC                   | 6        | +         |
| ILMN_1690114 | PTPLAD2   | NP_00101   | 1470091   | S         | 3665      | GAGACAG                   | 9        | -         |
| ILMN_1691428 | PSMD12    | XP_00113   | 1440131   | I         | 2849      | TGCAGTGGATCCCAGCACTTTGGG  |          |           |
| ILMN_1691881 | IL4R      | NP_00100   | 1770678   | I         | 962       | GGGGAAT                   | 16       | +         |
| ILMN_1692145 | ZNF14     | NP_06635   | 2340674   | S         | 2358      | AGGCCAA                   | 19       | -         |
| ILMN_1693789 | ALPP      | NP_00162   | 4230088   | S         | 2672      | TCTATGCG                  | 2        | +         |
| ILMN_1694399 | ICA1      | NP_07168   | 6560411   | I         | 543       | GGATCAC                   | 7        | -         |
| ILMN_1695468 | SRPK2     | NP_87263   | 2350072   | I         | 107       | CTGGCCAT                  | 7        | -         |
| ILMN_1696027 | LOC642333 |            | 1010296   | A         | 611       | GGCCGGGAAGCTAAAAGACAAGT   |          |           |
| ILMN_1697304 | FARSLB    | NP_00567   | 460128    | S         | 2992      | CAGTCCCA                  | 2        | -         |
| ILMN_1697377 | LOC64984  | XP_94399   | 4830300   | S         | 644       | GGACAGTGTCTTTTGACCAACCAC  |          |           |
| ILMN_1699383 | LOC44260  | XP_94092   | 5360300   | A         | 2603      | TTTTGGAGGTCATGGCGGGAGGA   |          |           |
| ILMN_1700182 | LOC400721 |            | 5890162   | S         | 5744      | AAGGTCATGCCACTGCACTCCAGC  |          |           |
| ILMN_1709164 | RUNDC2B   | NP_00101   | 4780064   | I         | 1140      | GAGCTGG                   | 16       | +         |
| ILMN_1710362 | LOC64459  | XP_93279   | 1510196   | S         | 3719      | TGGTGAT                   | 1        | -         |
| ILMN_1711073 | LOC65348  | XP_93920   | 3890053   | I         | 5975      | TCTGTAC                   | 2        | -         |
| ILMN_1713319 | PBLD      | NP_07141   | 1340474   | I         | 2137      | GGAGTTCC                  | 10       | -         |
| ILMN_1713706 | ZNF786    | NP_68962   | 4200541   | S         | 3091      | TGGGAGG                   | 7        | -         |
| ILMN_1721204 | CSF2RA    | XP_94759   | 5340037   | I         | 1791      | CCGTTGCACTCCAGCCTGGGTAAC  |          |           |
| ILMN_1721349 | DKFZp564I | NP_11549   | 5700139   | S         | 2093      | GATATGA                   | X        | -         |
| ILMN_1722223 | LOC72857  | XP_00112   | 5270575   | A         | 224       | AGAATCAC                  | 5        | +         |
| ILMN_1726636 | HECTD2    | NP_77576   | 2230408   | I         | 1864      | ATTGAGTA                  | 10       | +         |
| ILMN_1730678 | ANKRD30E  | NP_00102   | 1690184   | I         | 2942      | CATGCACC                  | 18       | +         |
| ILMN_1731203 | KIAA1618  | NP_06600   | 4570561   | I         | 4774      | CAAGGCA                   | 17       | +         |
| ILMN_1732311 | CEP152    | NP_05580   | 3930370   | S         | 4067      | AGGCAGA                   | 15       | -         |
| ILMN_1733983 | LOC65331  | XP_93821   | 7320170   | I         | 1162      | CAGTGGCT                  | 5        | +         |
| ILMN_1734991 | PPM1B     | NP_00102   | 3450026   | I         | 1448      | GTAATCCT                  | 2        | +         |
| ILMN_1736008 | YRDC      | NP_07891   | 1340491   | S         | 1263      | AAGTCTCA                  | 1        | -         |
| ILMN_1737878 | FLJ34047  | NP_77594   | 4850735   | S         | 2829      | TACTCTTG                  | 5        | -         |
| ILMN_1738482 | CEP27     | NP_06056   | 3850524   | S         | 1256      | AGTCATGA                  | 15       | +         |
| ILMN_1739283 | UPF2      | NP_05635   | 2230307   | I         | 5         | GCTGGAG                   | 10       | -         |

|              |                    |           |                                |      |
|--------------|--------------------|-----------|--------------------------------|------|
| ILMN_1740165 | C14orf102 NP_06044 | 3140358 I | 161 GAAGCAG                    | 14 - |
| ILMN_1743476 | LOC65382 XP_94089  | 7100044 A | 3711 GTTTTGGAGGTCATGGTGGGAGG   |      |
| ILMN_1745931 | FLJ43663 XP_93563  | 3930180 A | 1437 AGGACAA                   | 7 -  |
| ILMN_1746919 | LOC64388 XP_93697  | 3180482 S | 1616 CTA <del>CTCGG</del>      | 12 + |
| ILMN_1748090 | SLC2A11 NP_00102   | 2750091 A | 1397 TGTCCAC                   | 22 + |
| ILMN_1750093 | SDHALP1            | 6420674 I | 10150 GATTGTGCCACCGTACTCCAGCCT |      |
| ILMN_1755114 | EIF2AK4 NP_00101   | 3370471 S | 5290 ATGGATCA                  | 15 + |
| ILMN_1756998 | LOC64769 XP_94184  | 2970600 S | 3 GCCACAAATAGAAAAGTTTTCTGC     |      |
| ILMN_1759872 | LOC64350 XP_93324  | 70286 A   | 2564 GTGGAAT                   | 18 - |
| ILMN_1766176 | RAP1A NP_00101     | 3060692 I | 188 GGTGATTA                   | 1 +  |
| ILMN_1771320 | FLJ38717 NP_00100  | 990100 S  | 2559 TTGCAGGC                  | 6 +  |
| ILMN_1772492 | MCART1 NP_21948    | 1980521 S | 1556 CCTAGCTG                  | 9 -  |
| ILMN_1776290 | LOC65359 XP_93974  | 430209 I  | 6963 GTGATGTC                  | 2 -  |
| ILMN_1778202 | FLJ40722 XP_94718  | 2600632 I | 2233 CTGGCGTTCACACCAGCCTGGCC   |      |
| ILMN_1778457 | IL18 NP_00155      | 5890196 S | 1038 TGTGGTG                   | 11 - |
| ILMN_1780496 | MGC1276 XP_93557   | 4490338 I | 1659 GCCGTGCG                  | 1 -  |
| ILMN_1783060 | SLC25A20 XP_00113  | 770255 I  | 561 GTAAGGTTGTCTACTCAGGAGGCT   |      |
| ILMN_1784554 | LOC64738 XP_94155  | 6040181 S | 837 AAATCAAAACTACTATGAGGCCGG   |      |
| ILMN_1785703 | LMOD3 NP_93801     | 4250609 S | 3155 CCCTAGAA                  | 3 -  |
| ILMN_1787314 | ALS2CR14 NP_83994  | 4900215 S | 830 TTTTCTTC                   | 2 -  |
| ILMN_1795461 | LOC72985 XP_00113  | 5720204 S | 1261 AGGGCTTA                  | 1 -  |
| ILMN_1798581 | MCM8 NP_87795      | 6270082 A | 3364 CAGTGAGC                  | 20 + |
| ILMN_1805668 | ZNF486 XP_37115    | 2070471 A | 3074 CATTGCAC                  | 19 + |
| ILMN_1806999 | MGC4093 NP_08505   | 270519 S  | 895 GGGGACA                    | 19 - |
| ILMN_1809750 | TDRD1 NP_94209     | 270301 S  | 3989 TTTATTAC                  | 10 + |
| ILMN_1811221 | SLC5A8 NP_66601    | 4010021 S | 3702 GTAATCTG                  | 12 - |
| ILMN_1812105 | PIP5K2B NP_61963   | 6370093 I | 1324 TTGAACCC                  | 17 - |
| ILMN_1812640 | AHR NP_00161       | 840189 S  | 4990 GGCCAAG                   | 7 +  |
| ILMN_1814039 | LOC65308 XP_93608  | 6860064 I | 6448 TGATGTGT                  | 2 -  |
| ILMN_1814204 | C21orf55 NP_06030  | 4390136 S | 1982 TTTTTTGA                  | 21 - |
| ILMN_1815578 | ZNF223 NP_03749    | 4760767 S | 2321 TGACCTAT                  | 19 + |
| ILMN_1751351 | FLJ90086 XP_37182  | 5050181 A | 4017 AAAAGAG                   | 6 -  |
| ILMN_1759250 | TAP2 NP_06131      | 1780528 A | 1448 GGTTTTCT                  | 6 -  |
| ILMN_1760509 | EOMES NP_00543     | 6760075 S | 2643 GTCCAGGA                  | 3 -  |
| ILMN_1773650 | LRRN3 NP_06080     | 7380181 S | 2676 GCTGCCTC                  | 7 +  |
| ILMN_1783795 | BTNL3 NP_00669     | 3180082 A | 1714 CTCCATCC                  | 5 +  |
| ILMN_1793461 | LOC65360 XP_49771  | 730468 S  | 12 GGACCATC                    | 1 -  |
| ILMN_1796335 | AYTL1 NP_06030     | 5670100 S | 1697 GACAACCC                  | 16 + |
| ILMN_1343293 | TXN                | 4260048 S | 72 GCAGATCGAGAGCAAGACTGCTTT    |      |
| ILMN_1651228 | RPS28 NP_00102     | 7510672 S | 329 CGCCACAC                   | 19 + |
| ILMN_1651498 | GADD45G NP_00669   | 70376 S   | 923 GCCCTGGA                   | 9 +  |
| ILMN_1651850 | RPS16 NP_00101     | 130768 S  | 496 GCGCTCGC                   | 19 - |
| ILMN_1651964 | ABCC5 NP_00101     | 7610097 I | 1804 CCGTCGGA                  | 3 -  |
| ILMN_1652003 | GNG10 NP_00101     | 4590608 S | 292 GCCTTCAA                   | 9 +  |
| ILMN_1652128 | LMBRD1 NP_06083    | 4590301 S | 1576 CTGGTTCT                  | 6 -  |
| ILMN_1652230 | LOC64736 XP_94152  | 3870088 S | 27 CCACGCGCGAAAATTCGGCCAGGC    |      |
| ILMN_1652631 | C9orf19 NP_07173   | 4280253 S | 1778 GCAGCTCC                  | 9 +  |
| ILMN_1652736 | RPS6KA3 NP_00457   | 5890647 I | 7247 G <del>TACTTAT</del> X    | -    |

|              |           |          |         |   |      |                           |    |   |
|--------------|-----------|----------|---------|---|------|---------------------------|----|---|
| ILMN_1653567 | LOC39003  | XP_37234 | 2140537 | S | 108  | TGGAACTC                  | 11 | - |
| ILMN_1653871 | PBEF1     | NP_00573 | 3800243 | I | 1544 | CGTCTTCAAGGACCCAGTTGCTGA  |    |   |
| ILMN_1654516 | TMPIT     | NP_11413 | 5560577 | S | 1055 | CCACAAGT                  | 7  | - |
| ILMN_1656057 | PLAU      | NP_00264 | 1740349 | S | 2049 | GTGGTCTT                  | 10 | + |
| ILMN_1656676 | ZYG11B    | NP_07892 | 4610019 | S | 6333 | GGAAGTT                   | 1  | + |
| ILMN_1656961 | CD82      | NP_00222 | 6770594 | A | 1323 | GGCAGC                    | 11 | + |
| ILMN_1657317 | POLR2J    | NP_00622 | 4810594 | S | 627  | TGTGGACT                  | 7  | - |
| ILMN_1657398 | LOC28475  | NP_00100 | 870349  | S | 4094 | CTGGTAGC                  | 20 | + |
| ILMN_1657497 | KIAA0319  | NP_05562 | 5910102 | S | 6659 | CAGCCTGT                  | 6  | - |
| ILMN_1657515 | RPS6KA5   | NP_00474 | 2030482 | I | 3521 | GGGGCAT                   | 14 | - |
| ILMN_1657996 | LOC64203  | XP_94119 | 360128  | S | 3    | GTCTTCACATCTACCTTTCTATGTC |    |   |
| ILMN_1658798 | MEGF9     | NP_00107 | 7560615 | A | 857  | GGCTCTGTCAGCCATGTGACTGTA  |    |   |
| ILMN_1658957 | LOC653635 |          | 3990128 | S | 2595 | GGGGGCT                   | 1  | - |
| ILMN_1659047 | HIST2H2A  | NP_00350 | 1030039 | S | 1    | CGACTTTC                  | 1  | - |
| ILMN_1659437 | TXNL5     | NP_11612 | 830047  | S | 378  | CACCTCAA                  | 17 | + |
| ILMN_1659490 | LOC65315  | XP_93190 | 5820682 | I | 2213 | GCTACTCA                  | 5  | + |
| ILMN_1660357 | LOC64182  | XP_94066 | 3180246 | S | 121  | GGGAGGAAGGAACGAGGCAAGG    |    |   |
| ILMN_1660498 | RPS27     | NP_00102 | 5290523 | S | 36   | CACGAGA                   | 1  | + |
| ILMN_1660549 | GPR177    | NP_00100 | 540288  | I | 1848 | TGTTTCAGC                 | 1  | - |
| ILMN_1661196 | CSF2RA    | NP_75844 | 4570168 | A | 1147 | ATTCACCC                  |    | X |
| ILMN_1661461 | LOC28354  | XP_37845 | 870575  | A | 4193 | GCCTCATG                  | 14 | - |
| ILMN_1661466 | LOC64642  | XP_94636 | 520209  | S | 189  | CAGTGACCAGGTTACCTACAGTAG  |    |   |
| ILMN_1661636 | ZMYM2     | NP_00344 | 6040079 | A | 4512 | CAAGTTTA                  | 13 | + |
| ILMN_1662617 | PPP2R3C   | NP_06038 | 2760110 | S | 1264 | GCTACCAT                  | 14 | - |
| ILMN_1662846 | GPR160    | NP_05518 | 6180427 | S | 1437 | TGCCCCCT                  | 3  | + |
| ILMN_1662865 | FLJ11151  | NP_06081 | 7550519 | S | 2496 | CAGGTGT                   | 16 | - |
| ILMN_1663422 | Rgr       | NP_70584 | 3440253 | S | 2648 | GCTCTGCA                  | 22 | + |
| ILMN_1663437 | EFCBP2    | NP_06193 | 6770669 | S | 1468 | CCACGCAT                  | 16 | + |
| ILMN_1664047 | CACNA1E   | NP_00071 | 2760452 | S | 9561 | CACTGCAC                  | 1  | + |
| ILMN_1664577 | DLD       | NP_00009 | 1690671 | S | 1675 | CCTGGGAC                  | 7  | + |
| ILMN_1664698 | UNC119    | NP_00513 | 1570164 | A | 1267 | CATGAGG                   | 17 | - |
| ILMN_1664706 | LOC65360  | XP_49771 | 6650593 | S | 133  | ATGGCCCC                  | 1  | - |
| ILMN_1664750 | TMBIM4    | NP_05714 | 5270356 | S | 610  | GGAGTTGGTCTTAGCCGCTGCAGC  |    |   |
| ILMN_1664802 | WSB1      | NP_05644 | 6650575 | A | 2671 | CTGTTTCT                  | 17 | + |
| ILMN_1665384 | SH3BP5L   | NP_08514 | 7320112 | S | 2889 | AGATCTGC                  | 1  | - |
| ILMN_1665557 | USP15     | NP_00630 | 70767   | S | 4159 | GCTGGGG                   | 12 | + |
| ILMN_1665781 | LOC39046  | XP_37252 | 6130672 | S | 61   | AACCACCC                  | 14 | + |
| ILMN_1665982 | AKTIP     | NP_07192 | 2360414 | A | 1431 | ATGTTAGC                  | 16 | - |
| ILMN_1666376 | TRIM56    | NP_11222 | 1780647 | S | 3115 | GGGCCAA                   | 7  | + |
| ILMN_1666480 | CDC123    | NP_00601 | 6110379 | S | 1191 | ACCGGCT                   | 10 | + |
| ILMN_1667162 | NKX3-1    | NP_00615 | 4670735 | S | 2969 | CCATCTTG                  | 8  | - |
| ILMN_1667319 | LPPR2     | NP_07357 | 3140274 | S | 2354 | GCTTGCCC                  | 19 | + |
| ILMN_1667460 | SULF2     | NP_94099 | 5270762 | A | 3335 | CAGGACA                   | 20 | - |
| ILMN_1667561 | IFRD1     | NP_00154 | 3780243 | A | 1957 | GACAAGA                   | 7  | + |
| ILMN_1667970 | LOC72882  | XP_00112 | 3060348 | S | 35   | TGCGCGC                   |    | X |
| ILMN_1667985 | NTNG2     | NP_11592 | 6270382 | S | 2101 | GGACCCC                   | 9  | + |
| ILMN_1668379 | LOC39147  | XP_94237 | 2630253 | A | 601  | CCTGCTCGGTGCACTCTCTGCAGG  |    |   |
| ILMN_1669177 | DHRS12    | NP_00102 | 4890114 | A | 562  | ACCCGGCC                  | 13 | - |

|              |          |          |           |                                |      |
|--------------|----------|----------|-----------|--------------------------------|------|
| ILMN_1669608 | PDE7A    | NP_00259 | 6960221 I | 2530 GCTGAATC                  | 8 -  |
| ILMN_1669790 | MNDA     | NP_00242 | 6380228 S | 1318 AACTGAG/                  | 1 +  |
| ILMN_1670130 | ARID3A   | NP_00521 | 4260446 S | 2546 CCACACACTCACCCTCCCAGCTTC  |      |
| ILMN_1670821 | CYorf15A | NP_00100 | 2190192 S | 1688 TTGATGCAY                 | +    |
| ILMN_1671516 | CIR      | NP_00487 | 2640088 A | 1294 AGGGAGA                   | 2 -  |
| ILMN_1671933 | CLCC1    | NP_00104 | 20674 S   | 4235 CTTCTCTGGACATGCGCGTTTGAG/ |      |
| ILMN_1672004 | TOB1     | NP_00574 | 2470477 S | 892 CCAATGG/                   | 17 - |
| ILMN_1672988 | LMNB1    | NP_00556 | 4900048 S | 2443 GGGAGGG                   | 5 +  |
| ILMN_1673113 | F2RL1    | NP_00523 | 5690201 S | 2245 CAGACTGC                  | 5 +  |
| ILMN_1674590 | LOC65257 | XP_94719 | 3180192 S | 537 GAGATGATGTGTGGTCCCCTGAA    |      |
| ILMN_1674650 | C9orf95  | NP_06035 | 7320079 S | 1013 CTCCTCT/                  | 9 -  |
| ILMN_1675117 | HSD17B11 | NP_05732 | 2190475 I | 465 ATGCTGGT                   | 4 -  |
| ILMN_1675424 | SIRPB1   | NP_00605 | 1570402 S | 3692 CTCCTCT/                  | 20 - |
| ILMN_1675939 | IFNGR1   | NP_00040 | 1500446 S | 1771 CGGAACA/                  | 6 -  |
| ILMN_1676016 | NBPF9    | XP_93911 | 6270324 I | 582 TATTTCTG/                  | 1 -  |
| ILMN_1676480 | LOC65405 | XP_94877 | 7400592 S | 941 TGGGATTCGGCCTCTGGAAAGTGC   |      |
| ILMN_1676737 | Septin 2 | NP_00100 | 780431 I  | 352 TTTTTTGT/                  | 2 +  |
| ILMN_1676767 | CLEC4D   | NP_52512 | 3990328 S | 1551 GCCAAAG/                  | 12 + |
| ILMN_1677511 | PTGS2    | NP_00095 | 1470682 S | 3943 GCCTATGT                  | 1 -  |
| ILMN_1678170 | MME      | NP_00921 | 240608 A  | 5051 GAGTCTGCCTCCATGCTGCAGTGT  |      |
| ILMN_1678690 | UPB1     | NP_05741 | 7160367 S | 1915 GAAATTCT                  | 22 + |
| ILMN_1678707 | TAF15    | NP_63196 | 5960128 A | 1913 TTGCCAGA/                 | 17 + |
| ILMN_1678799 | RAPGEF1  | NP_94137 | 6100576 I | 65 AAGAGAT/                    | 9 -  |
| ILMN_1678939 | VNN2     | NP_51104 | 5570673 A | 1770 CTCCAGCT                  | 6 -  |
| ILMN_1679666 | SCGB3A1  | NP_44309 | 2060543 S | 221 ATCCCCGT                   | 5 -  |
| ILMN_1679920 | LOC65189 | XP_94624 | 1570750 S | 7 TTGGGCTTCACCCATAACCCACTGC    |      |
| ILMN_1680314 | TXN      | NP_00332 | 830762 S  | 43 CGTCAGAC                    | 9 -  |
| ILMN_1681130 | ACP6     | NP_05744 | 3180376 S | 1595 TGCCGAG/                  | 1 -  |
| ILMN_1681683 | LOC65091 | XP_94951 | 4250543 S | 1385 GTAGTCTGCAGATGTGGATCCTAA  |      |
| ILMN_1681888 | PRKAR2A  | NP_00414 | 4900593 S | 2304 GGGTCTGC                  | 3 -  |
| ILMN_1682165 | NT5C2    | NP_03636 | 520647 S  | 3272 CTTCCATT/                 | 10 - |
| ILMN_1682443 | UBE2D3   | NP_87161 | 4640110 A | 2052 TGGTGTGC                  | 4 -  |
| ILMN_1682699 | PBX2     | NP_00257 | 5550500 S | 3106 GGGAGGCATGGGCCGGGGGCAG/   |      |
| ILMN_1682757 | PFKFB2   | NP_00620 | 3190326 I | 6815 GGGCTGA/                  | 1 +  |
| ILMN_1683250 | LOC44073 | XP_93878 | 270768 A  | 111 TGGCTAG/                   | 1 -  |
| ILMN_1683494 | TMEM154  | NP_68989 | 7650379 S | 2498 TCCAACCC                  | 4 -  |
| ILMN_1683959 | THRAP2   | NP_05615 | 1990332 S | 9174 GGGGAAA                   | 12 - |
| ILMN_1684054 | ASAH1    | NP_80859 | 840161 I  | 261 GCTCTTCTTTGCCTCTGCTGGAGTC  |      |
| ILMN_1684585 | ACSL1    | NP_00198 | 4880717 S | 3553 GGGGTCT/                  | 4 -  |
| ILMN_1685312 | PSG11    | NP_00277 | 3400292 I | 413 TTCCAATG                   | 19 - |
| ILMN_1685493 | TMCC3    | NP_06574 | 2650152 S | 4505 GGGCAAA/                  | 12 - |
| ILMN_1686116 | THBS1    | NP_00323 | 5910376 S | 4947 CAGTCTAA                  | 15 + |
| ILMN_1686464 | SLCO4C1  | NP_85132 | 770717 S  | 4454 CTCCCACC                  | 5 -  |
| ILMN_1686750 | MGEA5    | NP_03634 | 1010402 S | 4955 CACAGGT/                  | 10 - |
| ILMN_1686862 | HLX1     | NP_06877 | 1400706 S | 1612 CACGGAG/                  | 1 +  |
| ILMN_1686981 | SULF2    | NP_06132 | 1850056 I | 2862 GTTTCAGC                  | 20 - |
| ILMN_1687057 | RBM7     | NP_05717 | 5390326 S | 1656 AGTGCCCA/                 | 11 + |
| ILMN_1687384 | IFI6     | NP_00202 | 4390176 A | 743 TGCGCCG/                   | 1 -  |

|              |           |           |         |   |      |                            |      |
|--------------|-----------|-----------|---------|---|------|----------------------------|------|
| ILMN_1687805 | LOC65189  | XP_946248 | 5130273 | S | 131  | TGGAATTTGCAAAGCTGCCAAAGC   |      |
| ILMN_1688580 | CAMP      | NP_004331 | 6400736 | S | 644  | AGAGTCCT                   | 3 +  |
| ILMN_1689004 | TNFRSF12  | NP_057721 | 2190008 | S | 634  | CAGAAAGC                   | 16 + |
| ILMN_1689955 | C19orf40  | NP_689471 | 7150189 | S | 676  | GGAGCAGC                   | 19 + |
| ILMN_1691364 | STAT1     | NP_644671 | 3190133 | I | 2595 | CGCCATCA                   | 2 -  |
| ILMN_1691508 | PLAUR     | NP_001001 | 6130594 | I | 1107 | TCAGCCAT                   | 19 - |
| ILMN_1691574 | LOC64606  | XP_938468 | 2450014 | S | 1382 | TGTATAGT                   | 16 - |
| ILMN_1693394 | BCKDK     | NP_005871 | 5390056 | S | 1742 | AGCACCAAC                  | 16 + |
| ILMN_1693494 | CMTM1     | NP_851811 | 4830017 | A | 704  | CACCCCCG                   | 16 + |
| ILMN_1693740 | LOC64783  | XP_948141 | 2600669 | S | 2498 | TAAGATCATGTCACTGCACTCCAGC  |      |
| ILMN_1694075 | GADD45A   | NP_001911 | 3140239 | S | 659  | CTGCACTG                   | 1 +  |
| ILMN_1694584 | CLTCL1    | NP_009021 | 5090026 | I | 4593 | G TTCAGGTGCATTGCGGCCTATCTC |      |
| ILMN_1694742 | RPS29     | NP_001021 | 1990753 | A | 63   | GCGAAAA                    | 14 - |
| ILMN_1695435 | LOC65361  | XP_933480 | 5670544 | S | 713  | ATGCTGGC                   | 1 +  |
| ILMN_1695853 | CLK4      | NP_065711 | 6510110 | S | 2086 | GGGTGATC                   | 5 -  |
| ILMN_1696162 | MME       | NP_000891 | 2360400 | I | 28   | AGATGTGCAAGTGGCGAAGCTTG    |      |
| ILMN_1696187 | PYGL      | NP_002851 | 4610113 | S | 2494 | ATCCAAAC                   | 14 - |
| ILMN_1696466 | ROPN1L    | NP_114121 | 1050240 | S | 740  | GGGCCCGC                   | 5 +  |
| ILMN_1696704 | TLE4      | NP_008931 | 6290170 | S | 4048 | GGCATGCT                   | 9 +  |
| ILMN_1698213 | RBM3      | NP_001011 | 7380612 | A | 346  | GAGGTGG X                  | +    |
| ILMN_1699015 | LOC440926 |           | 4590593 | A | 143  | CGTACAAAGCAGACTGCCCGCAA    |      |
| ILMN_1699331 | IFIT1     | NP_001531 | 6220673 | I | 108  | GATGCAGC                   | 10 + |
| ILMN_1699687 | USP9Y     | NP_004641 | 6290398 | S | 9257 | GTGTAGCC Y                 | +    |
| ILMN_1700610 | CLEC7A    | NP_922941 | 1090170 | A | 43   | CCTAGCCC                   | 12 - |
| ILMN_1700896 | SAP30     | NP_003851 | 2510133 | S | 873  | CAGATCTC                   | 4 +  |
| ILMN_1701242 | UTY       | NP_872601 | 5310196 | I | 4730 | TGCCTTCT Y                 | -    |
| ILMN_1701747 | PFN2      | NP_444251 | 4210246 | I | 620  | GGTGATGC                   | 3 -  |
| ILMN_1701957 | MXD1      | NP_002341 | 2260239 | S | 5318 | TTTTGGGC                   | 2 +  |
| ILMN_1702168 | HSD17B12  | NP_057221 | 3290411 | S | 1747 | GTACCACT                   | 11 + |
| ILMN_1703720 | SF3B14    | NP_057131 | 1410315 | S | 199  | TTCATCAG                   | 2 -  |
| ILMN_1704385 | LOC34737  | XP_943021 | 5900072 | A | 1    | ATACCATGGCTCGTACAAGGTGGA   |      |
| ILMN_1704476 | LOC28315  | NP_001021 | 4810324 | A | 314  | GCATGCCA                   | 11 - |
| ILMN_1705477 | CAMK1D    | NP_065131 | 3930653 | I | 1347 | GCATCTGC                   | 10 + |
| ILMN_1705605 | LOC653635 |           | 2480278 | S | 2417 | ACACCAGC                   | 1 -  |
| ILMN_1706502 | EIF2AK2   | NP_002751 | 1190349 | S | 2728 | CGTTCTCT                   | 2 -  |
| ILMN_1708485 | BIN3      | NP_061151 | 7550392 | S | 1578 | TTGTGCTGTAACCTTAGGCGAGCAG  |      |
| ILMN_1708841 | GOLPH3    | NP_071411 | 4780114 | S | 2120 | GGGAAGA                    | 5 -  |
| ILMN_1708936 | EXOSC3    | NP_001001 | 1980743 | A | 721  | CAGGTCAAC                  | 9 -  |
| ILMN_1709707 | LOC64749  | XP_948031 | 6560128 | I | 589  | AGGCCCTTTGCCTTACAGAGAAG    |      |
| ILMN_1710974 | RGS2      | NP_002911 | 5690500 | S | 865  | CCTCACTG                   | 1 +  |
| ILMN_1711156 | LOC64589  | XP_933951 | 7570673 | S | 83   | TGTGGCGC                   | 8 -  |
| ILMN_1711617 | GMFG      | NP_004861 | 4250452 | S | 469  | TCCTCAGG                   | 19 - |
| ILMN_1711729 | LOC64496  | XP_933140 | 2600187 | S | 1    | CAAAATGC X                 | -    |
| ILMN_1712389 | CKLF      | NP_057411 | 2000551 | A | 174  | ACATCGCC                   | 16 + |
| ILMN_1712596 | NUDT16P   |           | 6420402 | S | 1354 | AGAGCCTC                   | 3 +  |
| ILMN_1712688 | LOC65350  | XP_932860 | 160494  | S | 3717 | TGGTGATC                   | 1 -  |
| ILMN_1712918 | NQO2      | NP_000891 | 870400  | S | 621  | CGGGAGG                    | 6 +  |
| ILMN_1713636 | S100A6    | NP_055431 | 1500553 | S | 527  | GGAGTATC                   | 1 -  |

|              |          |           |         |   |       |                           |      |
|--------------|----------|-----------|---------|---|-------|---------------------------|------|
| ILMN_1714065 | FAM101B  | XP_001126 | 2350093 | S | 5     | CTCCCACCAGCCTCTTAACTACTTG |      |
| ILMN_1714418 | FAM101B  | NP_87436  | 940246  | S | 292   | CCTGGCTCCCGGCTGTGCGCTGAG  |      |
| ILMN_1714848 | ZNF354A  | NP_00564  | 2850670 | S | 2312  | TGTCACGT                  | 5 -  |
| ILMN_1714991 | S100A9   | NP_00295  | 830400  | S | 506   | GCCTGTTATGTCAAACGTCTTGGC  |      |
| ILMN_1715693 | LOC44016 | XP_49857  | 1190731 | S | 115   | TCCTGCAGCTGTGTTTGAACAGGT  |      |
| ILMN_1715809 | OGFRL1   | NP_07885  | 2750315 | S | 1038  | AAAGGAG                   | 6 +  |
| ILMN_1716465 | RBP7     | NP_44319  | 4810131 | S | 421   | GTGCAAAC                  | 1 +  |
| ILMN_1717371 | C22orf34 | NP_00103  | 5910682 | S | 1303  | TGCTTTCT                  | 22 - |
| ILMN_1718303 | PVRL2    | NP_00284  | 2570544 | S | 1789  | CTGGACGGCTCCCTCATCTCACGG  |      |
| ILMN_1719951 | FLJ31951 | NP_65332  | 2490437 | S | 2719  | GGGTGGG                   | 5 -  |
| ILMN_1719988 | HAL      | NP_00209  | 6660327 | S | 2301  | GGGCAGT                   | 12 - |
| ILMN_1720604 | ARSG     | NP_05577  | 5420379 | S | 1739  | GTTAGCCT                  | 17 + |
| ILMN_1721116 | USP10    | NP_00514  | 1980021 | S | 2458  | GATCAACCAGTACCAGGTGGTGA   |      |
| ILMN_1721648 | EXOC8    | NP_78707  | 5130491 | S | 4522  | GGAACCTC                  | 1 -  |
| ILMN_1721729 | PPARBP   | NP_00476  | 6760373 | S | 5590  | GGGTTCA                   | 17 - |
| ILMN_1722076 | DHRS8    | XP_00113  | 1570553 | A | 1604  | CCTACCCATTGCCACTCTGTTTCCT |      |
| ILMN_1723079 | LTB4R    | NP_85804  | 3120735 | S | 2942  | TGAGAGCC                  | 14 + |
| ILMN_1723320 | FLJ37307 |           | 5490440 | A | 3986  | GTCTTCCT                  | 13 - |
| ILMN_1723486 | HK2      | NP_00018  | 4760768 | S | 6532  | GAGCACAC                  | 2 +  |
| ILMN_1723909 | LOC40217 | NP_00101  | 4050056 | S | 1350  | ACTGCATC                  | 4 -  |
| ILMN_1724315 | LMTK2    | NP_05573  | 4050040 | S | 5327  | GGATCTTC                  | 7 +  |
| ILMN_1724407 | TACC3    | NP_00633  | 2630544 | S | 2550  | GGAGCAG                   | 4 +  |
| ILMN_1724533 | LY96     | NP_05617  | 6980474 | S | 505   | TGGGAGCC                  | 8 +  |
| ILMN_1725427 | B2M      | NP_00403  | 6290114 | S | 402   | GTGGGATC                  | 15 + |
| ILMN_1726289 | C12orf35 | NP_06063  | 3310446 | S | 5367  | ACGGAAG                   | 12 + |
| ILMN_1726786 | TNRC6B   | NP_00102  | 2600386 | A | 15415 | CTAGGCAC                  | 22 + |
| ILMN_1727603 | ZKSCAN1  | NP_00343  | 1580187 | S | 5035  | ATCCTCAG                  | 7 +  |
| ILMN_1728639 | FCGR3B   | NP_00056  | 3990360 | S | 1450  | GAGCCCTC                  | 1 -  |
| ILMN_1728677 | CREB5    | NP_00101  | 4220026 | I | 40    | GAGCTCTC                  | 7 +  |
| ILMN_1728724 | IL17RA   | NP_05515  | 3870110 | S | 2932  | CAGGGGA                   | 22 + |
| ILMN_1728844 | PTPRN2   | NP_57085  | 6580717 | A | 4200  | CCGATTCCG                 | 7 -  |
| ILMN_1729294 | RNF130   | NP_06090  | 5670603 | S | 1503  | CCTCAGGA                  | 5 -  |
| ILMN_1729421 | LOC64975 | XP_94705  | 70041   | A | 190   | GGGGTAGAAGTTATGCTTGTGTTT  |      |
| ILMN_1729659 | TNNI2    | NP_00327  | 6350142 | S | 274   | GTGAGGG                   | 11 + |
| ILMN_1729801 | S100A8   | NP_00295  | 6280576 | S | 253   | TAACTTCC                  | 1 -  |
| ILMN_1730454 | FOLR3    | NP_00079  | 2230601 | S | 759   | GCCCCGTC                  | 11 + |
| ILMN_1730928 | CDK5R1   | NP_00387  | 770484  | S | 3133  | CCCTCAGT                  | 17 + |
| ILMN_1731048 | TLR1     | NP_00325  | 5080398 | S | 2736  | GTGAGTG                   | 4 -  |
| ILMN_1731546 | RPL26    | NP_00097  | 2000025 | S | 57    | CTTCCCTT                  | 17 - |
| ILMN_1731785 | ORM2     | NP_00059  | 6370202 | S | 473   | GCTGTTCC                  | 9 +  |
| ILMN_1735014 | KLF6     | NP_00129  | 5260397 | I | 1330  | CCCTTCCG                  | 10 - |
| ILMN_1735506 | CYSLTR1  | NP_00663  | 4810204 | S | 1218  | TGCAGAA(X                 | -    |
| ILMN_1735955 | LOC64403 | XP_93237  | 4290669 | S | 283   | CAAACCTG                  | 8 -  |
| ILMN_1736190 | CYP4F3   | NP_00088  | 650164  | S | 4625  | CTATCTAT                  | 19 + |
| ILMN_1736982 | PHACTR1  | NP_11221  | 3800095 | S | 1803  | AGATAAGC                  | 6 +  |
| ILMN_1737426 | PCMTD1   | NP_44316  | 240037  | S | 3666  | TCTAGCAT                  | 8 -  |
| ILMN_1738243 | RPS29    | NP_00102  | 5960026 | I | 194   | TGGACTAA                  | 14 - |
| ILMN_1738643 | LOC64496 | XP_93313  | 70221   | S | 430   | CTATGCCA                  | 19 - |

|              |           |          |         |   |      |                          |      |
|--------------|-----------|----------|---------|---|------|--------------------------|------|
| ILMN_1738821 | GOLGA2    | NP_00447 | 5390445 | S | 3921 | CCATCTTC                 | 9 -  |
| ILMN_1739263 | LOC64328  | XP_93327 | 4230615 | S | 68   | GGCCAGG                  | 9 +  |
| ILMN_1739423 | RN7SK     |          | 5080673 | S | 257  | CGTAGGG                  | 6 +  |
| ILMN_1739587 | UTY       | NP_00905 | 5420224 | I | 6354 | GCTATACTY                | -    |
| ILMN_1739622 | PPP1R12A  | NP_00247 | 4180280 | S | 4479 | ACATCTTT                 | 12 - |
| ILMN_1739876 | RAB3GAP1  | NP_03636 | 6330561 | S | 3989 | CATGGAG                  | 2 +  |
| ILMN_1741073 | FCAR      | NP_57981 | 6860239 | I | 1361 | CTGCACAC                 | 19 + |
| ILMN_1741917 | OSCAR     | NP_57012 | 2190609 | A | 983  | AACGGTCC                 | 19 - |
| ILMN_1743034 | KIF1B     | NP_90432 | 3170719 | I | 5646 | GCCCAGG                  | 1 +  |
| ILMN_1743281 | PHF3      | NP_05596 | 2510687 | S | 6079 | GGAGAAA                  | 6 +  |
| ILMN_1746020 | MDM4      | NP_00238 | 4490671 | S | 2032 | CTTCTGCC                 | 1 +  |
| ILMN_1746276 | EPC1      | NP_07948 | 2680010 | S | 2756 | ACACAGTA                 | 10 - |
| ILMN_1746577 | RAE1      | NP_00360 | 4850138 | A | 1662 | CTAAGGG                  | 20 + |
| ILMN_1746864 | PSCDBP    | NP_00427 | 5390195 | S | 1719 | GGGGTTA                  | 2 -  |
| ILMN_1747047 | ZNF346    | NP_03641 | 3420373 | S | 2662 | GTGTCCAC                 | 5 +  |
| ILMN_1747205 | JDP2      | NP_56973 | 3180379 | S | 1608 | GCCAGGG                  | 14 + |
| ILMN_1748366 | SLC5A9    | NP_00101 | 70270   | S | 2889 | CTGTATTT                 | 1 +  |
| ILMN_1748767 | LOC73074  | XP_00112 | 4920408 | S | 228  | TGTGGCGCTCCGTGAAATTAGACG |      |
| ILMN_1748915 | S100A12   | NP_00561 | 10279   | S | 241  | TCCAAGGC                 | 1 -  |
| ILMN_1749006 | RCSD1     | NP_44309 | 3140280 | S | 2692 | TGCAAGG                  | 1 +  |
| ILMN_1749673 | CSF2RA    | NP_75844 | 4150246 | A | 1244 | CCGCCTCCX                | +    |
| ILMN_1750880 | AMN1      | NP_99722 | 3990719 | S | 1629 | CCACGCTT                 | 12 - |
| ILMN_1750961 | TM6SF1    | NP_07537 | 10541   | S | 964  | GGAGGTC                  | 15 + |
| ILMN_1751051 | C7orf25   | NP_07695 | 4570397 | S | 1351 | CAGCCCA                  | 7 -  |
| ILMN_1751749 | SYNJ2     | NP_00388 | 5900592 | S | 6404 | CAAAGAA                  | 6 +  |
| ILMN_1753712 | STX10     | NP_00375 | 3190681 | S | 685  | TGGTGTGC                 | 19 - |
| ILMN_1753819 | RFFL      | NP_00101 | 5870551 | A | 3411 | GGGCAGA                  | 17 - |
| ILMN_1754395 | ADCK4     | NP_07915 | 1690221 | S | 1907 | GGAACTCC                 | 19 - |
| ILMN_1754859 | TRIM25    | NP_00507 | 2850576 | S | 5462 | CAGCCTGA                 | 17 - |
| ILMN_1755049 | ANKRD44   | NP_71018 | 4730377 | S | 2988 | CCTACAAG                 | 2 -  |
| ILMN_1755077 | HEBP2     | NP_05513 | 5090184 | S | 804  | CGATGAG                  | 6 +  |
| ILMN_1755115 | RPL23     | NP_00096 | 4120707 | S | 321  | TCCAGCAC                 | 17 - |
| ILMN_1756506 | CYorf15B  | NP_11596 | 4730458 | S | 4976 | AGCAGTG(Y                | +    |
| ILMN_1758418 | TNFSF13B  | NP_00656 | 460608  | S | 634  | GGCAACTC                 | 13 + |
| ILMN_1758658 | FADD      | NP_00381 | 1940035 | S | 1558 | CTCTGAGA                 | 11 + |
| ILMN_1759208 | RGS18     | NP_57013 | 1240438 | S | 1787 | GGGGAAG                  | 1 +  |
| ILMN_1759613 | PNMA6A    | NP_11627 | 6760270 | S | 1892 | GATGGCG(X                | +    |
| ILMN_1760347 | SRGN      | NP_00271 | 650541  | S | 482  | CCTTAGGT                 | 10 + |
| ILMN_1760542 | PSMA1     | NP_68387 | 20451   | I | 233  | CCTTGGCC                 | 11 - |
| ILMN_1760779 | ENSA      | NP_99705 | 1110685 | A | 236  | GCCTGAG                  | 1 -  |
| ILMN_1761411 | C10orf119 | NP_07911 | 4830192 | S | 4030 | CAGCGTTA                 | 10 - |
| ILMN_1763260 | HIF1A     | NP_00152 | 2850288 | I | 2496 | TTACAGCA                 | 14 + |
| ILMN_1763408 | RBMXL1    | NP_06255 | 5080093 | S | 3210 | CTCCCCGT                 | 1 -  |
| ILMN_1763452 | EVI2B     | NP_00648 | 2030593 | S | 1401 | CCTCCCAA                 | 17 - |
| ILMN_1763809 | IRS2      | NP_00374 | 6980095 | S | 6369 | GTA ACTCC                | 13 - |
| ILMN_1763837 | ANPEP     | NP_00114 | 1770605 | S | 3149 | CTCCAGCC                 | 15 - |
| ILMN_1764082 | MBOAT1    | XP_00113 | 5810731 | A | 2451 | GAGCTGAAGAGGGGCTGCTGTTT  |      |
| ILMN_1764396 | HDAC4     | NP_00602 | 5960341 | S | 8280 | GGTGATG                  | 2 -  |

|              |          |          |         |   |       |                           |    |   |
|--------------|----------|----------|---------|---|-------|---------------------------|----|---|
| ILMN_1764415 | ZNF585A  | NP_68986 | 460504  | I | 5     | CGGAAGT                   | 19 | - |
| ILMN_1765061 | OXER1    | NP_68376 | 510491  | S | 1501  | GTGGGTGGCAGGGAGAGAAACCC   |    |   |
| ILMN_1765122 | MAP3K2   | NP_00660 | 2320296 | A | 3192  | GCAGCCTC                  | 2  | - |
| ILMN_1767809 | LOC55289 | NP_00411 | 5820176 | S | 337   | AACCGCCT                  | 9  | + |
| ILMN_1768117 | RBM25    | NP_06706 | 840075  | S | 4100  | ACACACCT                  | 14 | + |
| ILMN_1768394 | ARPC5    | NP_00570 | 3930243 | S | 1767  | CGAGTAGC                  | 1  | - |
| ILMN_1769705 | LOC44009 | NP_00101 | 4730100 | S | 307   | TTCAACAC                  | 12 | - |
| ILMN_1769734 | NT5C3    | NP_00100 | 3780689 | A | 962   | ACTCCCAA                  | 7  | - |
| ILMN_1769741 | RPL32    | NP_00100 | 2340373 | I | 1     | GACCTCCT                  | 3  | - |
| ILMN_1769764 | ANKRD55  | NP_07894 | 4670056 | S | 1969  | CTGCCAAC                  | 5  | - |
| ILMN_1769937 | LOC64982 | XP_94730 | 5550364 | A | 192   | GGCCTTCTCACCTAACGCCACCAAI |    |   |
| ILMN_1770161 | BST1     | NP_00432 | 4920243 | S | 1081  | GTAAGTGC                  | 4  | + |
| ILMN_1770244 | CBX1     | NP_00679 | 2450446 | S | 1745  | AGAGGAAI                  | 17 | - |
| ILMN_1770831 | LOC64197 | XP_94084 | 6040114 | S | 7     | CTAATAACAGTGACCTCCCGCCAI  |    |   |
| ILMN_1771048 | LOC65315 | XP_93190 | 3460735 | A | 194   | TATAAGAT                  | 5  | + |
| ILMN_1771664 | CLEC4E   | NP_05517 | 940754  | S | 1426  | GGCTGTAA                  | 12 | - |
| ILMN_1771815 | C20orf43 | NP_05749 | 4050537 | S | 1458  | TCCCTCTG                  | 20 | + |
| ILMN_1772163 | PRKY     | NP_00275 | 2900048 | S | 6641  | ATCTGGCCY                 |    | + |
| ILMN_1772387 | TLR2     | NP_00325 | 1260008 | S | 3246  | GCCACAA                   | 4  | + |
| ILMN_1773154 | NFKBIA   | NP_06539 | 4570154 | S | 992   | GAGGACG                   | 14 | - |
| ILMN_1773757 | SLC26A8  | NP_44319 | 6650717 | A | 2874  | GCAGCGTI                  | 6  | - |
| ILMN_1775268 | HECW2    | NP_06581 | 3140541 | S | 6706  | CTGGGACC                  | 2  | - |
| ILMN_1775444 | FLJ12078 |          | 7150039 | A | 2413  | GGGGTGAAGTGGAAAATCCAGGG   |    |   |
| ILMN_1776195 | TMSB4Y   | NP_00419 | 4150095 | S | 1360  | AGTGGCG`Y                 |    | + |
| ILMN_1776515 | MPPE1    | NP_07556 | 780168  | A | 2114  | TCGTCACTCACATGCACGACAGTCI |    |   |
| ILMN_1776649 | LRRK2    | NP_94098 | 1450523 | A | 7502  | CACAGCTA                  | 12 | + |
| ILMN_1777565 | TAP2     | NP_00053 | 2970240 | I | 5257  | ACTTGCCCT                 | 6  | - |
| ILMN_1778709 | PICALM   | NP_00909 | 1580364 | I | 1560  | CTGTAGAT                  | 11 | - |
| ILMN_1778930 | CHD7     | NP_06025 | 4640750 | S | 10019 | TGTCCCGA                  | 8  | + |
| ILMN_1779228 | CDH2     | NP_00178 | 4780376 | S | 4032  | GCCTCTGT                  | 18 | - |
| ILMN_1779572 | LOC44045 | XP_94027 | 7510424 | I | 895   | GTCCATCA                  | 17 | - |
| ILMN_1781198 | PPP1R3D  | NP_00623 | 6400064 | S | 3031  | GGCCTTCA                  | 20 | - |
| ILMN_1782459 | OSBPL8   | NP_00100 | 3830138 | A | 6974  | CCTGCAGT                  | 12 | - |
| ILMN_1783085 | IL8RB    | NP_00154 | 2710437 | S | 2541  | GGAGGGG                   | 2  | + |
| ILMN_1783675 | ASB8     | NP_07700 | 4280114 | S | 2124  | GGCAGTTC                  | 12 | - |
| ILMN_1783805 | PNMA3    | NP_03749 | 2490113 | S | 3474  | CGGGACCTGTGTGGGACCTGTGTC  |    |   |
| ILMN_1784300 | TUBA4A   | NP_00599 | 380731  | S | 1391  | GAGGGAG                   | 2  | - |
| ILMN_1784380 | DTX3L    | NP_61214 | 2850100 | S | 4588  | GGGATTAC                  | 3  | + |
| ILMN_1785167 | OSBPL9   | NP_07886 | 6020685 | A | 2397  | GCTTCCCT                  | 1  | + |
| ILMN_1785345 | GPR84    | NP_06510 | 2370576 | S | 1181  | GCATCAAC                  | 12 | - |
| ILMN_1785615 | SUMO1P1  |          | 5340050 | S | 447   | GACTTTCCAGTTGGCCCTGATTTTC |    |   |
| ILMN_1786847 | TGM3     | NP_00323 | 3440754 | S | 2485  | TGATCCCC                  | 20 | + |
| ILMN_1787186 | NOV      | NP_00250 | 6420367 | S | 1974  | TGAGGCC                   | 8  | + |
| ILMN_1787378 | ADD3     | NP_05843 | 1690273 | I | 2132  | GATGACG                   | 10 | + |
| ILMN_1787808 | CEP63    | NP_07945 | 1090300 | S | 2450  | GGAAGAGGAGGAACTGAGGTCTC   |    |   |
| ILMN_1787897 | CXCL1    | NP_00150 | 6130576 | S | 792   | GGCTGGC                   | 4  | + |
| ILMN_1788143 | LINS1    | NP_00103 | 730491  | A | 1016  | GAAACCATCTTGCATGCTAGAAGT  |    |   |
| ILMN_1788439 | LOC44119 | NP_00101 | 2060113 | S | 1600  | GAAAACCC                  | 7  | - |



|              |           |          |         |   |       |                           |    |   |
|--------------|-----------|----------|---------|---|-------|---------------------------|----|---|
| ILMN_1788701 | PSIP1     | NP_15009 | 1240541 | I | 3023  | TGAATATT                  | 9  | - |
| ILMN_1790412 | FLJ39639  | XP_37093 | 5420452 | A | 2341  | GCTTTACG                  | 16 | + |
| ILMN_1790625 | CBX3      | NP_05767 | 4880020 | I | 37    | TCCCCCTT                  | 7  | + |
| ILMN_1790689 | CRISPLD2  | NP_11366 | 6060224 | S | 4224  | ACGGCGTI                  | 16 | + |
| ILMN_1790715 | LOC65310  | XP_93630 | 3800139 | I | 1     | TGCCGACT                  | 1  | + |
| ILMN_1790891 | CKAP4     | NP_00681 | 6770348 | S | 2458  | CTGCCTCC                  | 12 | - |
| ILMN_1790985 | dJ341D10  | NP_00100 | 4180402 | S | 1152  | TCAGGGGT                  |    | + |
| ILMN_1791253 | FBXL13    | NP_65946 | 5050653 | S | 2503  | CCCTCCAC                  | 7  | - |
| ILMN_1791536 | BTAF1     | NP_00396 | 1820546 | S | 6646  | CTGGGCAK                  | 10 | + |
| ILMN_1792207 | MLX       | NP_73375 | 5820021 | A | 2409  | GAGATGTC                  | 17 | + |
| ILMN_1792997 | NPTN      | NP_03656 | 5360338 | A | 1992  | GGGCTTA                   | 15 | - |
| ILMN_1794223 | COX7B     | NP_00185 | 70722   | S | 141   | TCAGCAA                   |    | + |
| ILMN_1794333 | POU2F1    | NP_00268 | 3850554 | S | 2380  | TCCAAGGC                  | 1  | + |
| ILMN_1796138 | BMX       | NP_00171 | 5560451 | A | 1987  | ACAGGCTT                  |    | + |
| ILMN_1796316 | MMP9      | NP_00498 | 4150224 | S | 2049  | GCTTCTAC                  | 20 | + |
| ILMN_1796642 | NCF2      | NP_00042 | 7050360 | S | 2056  | GGGGAGA                   | 1  | - |
| ILMN_1797207 | TTY15     |          | 2570082 | S | 4933  | GGCTGCA                   |    | + |
| ILMN_1797745 | MAP4K4    | NP_66371 | 2450170 | A | 6802  | GCAGGGA                   | 2  | + |
| ILMN_1797875 | ALOX5AP   | NP_00162 | 4180411 | S | 664   | TCTATTGG                  | 13 | + |
| ILMN_1798233 | PSMB9     | NP_68375 | 6130669 | A | 767   | TGGGAAA                   | 6  | + |
| ILMN_1798804 | SRPK1     | NP_00312 | 3460674 | S | 4153  | GGCAGCT                   | 6  | - |
| ILMN_1799030 | CMTM2     | NP_65327 | 5080300 | S | 763   | CCACTTCA                  | 16 | + |
| ILMN_1799106 | MOSC1     | NP_07358 | 1980082 | S | 1680  | GGACCCCT                  | 1  | + |
| ILMN_1799644 | IBRDC2    | NP_87743 | 5910037 | S | 4431  | GTTGTGAC                  | 6  | + |
| ILMN_1799848 | ANKRD22   | NP_65319 | 4200543 | S | 609   | CCTCTGCT                  | 10 | - |
| ILMN_1800638 | CUGBP2    | NP_00102 | 6110672 | I | 2065  | CCCGGTGC                  | 10 | + |
| ILMN_1800695 | LOC64822  | XP_94401 | 3780189 | S | 2404  | TAAGTTAGCCCTTTGGGTAAGAGT  |    |   |
| ILMN_1801216 | S100P     | NP_00597 | 2640609 | S | 378   | AATGATGC                  | 4  | + |
| ILMN_1801776 | PSG9      | NP_00277 | 1050465 | S | 404   | TCCAACGC                  | 19 | - |
| ILMN_1801866 | BRWD1     | NP_38750 | 430400  | I | 12653 | AAAGGCTI                  | 21 | - |
| ILMN_1802096 | ABTB1     | NP_74202 | 5670424 | A | 1913  | CCATTCAG                  | 3  | + |
| ILMN_1802348 | SLC36A4   | NP_68952 | 2350195 | S | 2320  | GGAAAAG                   | 11 | - |
| ILMN_1802758 | ZNF281    | NP_03661 | 6940113 | S | 2768  | GACACCCA                  | 1  | - |
| ILMN_1802799 | C1orf108  | NP_07887 | 1690673 | A | 1613  | CAGGCCCC                  | 1  | + |
| ILMN_1803500 | ANP32A    | NP_00629 | 3360546 | S | 987   | TCTGATTG                  | 15 | - |
| ILMN_1803953 | LOC38878  | XP_94504 | 1440259 | A | 219   | GGCGAAGTCGTCAGACCAAAAGG   |    |   |
| ILMN_1805064 | SCARNA9   |          | 840639  | S | 46    | GCCAAATC                  | 11 | + |
| ILMN_1805104 | ABAT      | NP_06573 | 1030685 | A | 4303  | AACTCAGCAGAAGCTGGTAAAAAC  |    |   |
| ILMN_1806122 | CHD8      | NP_06597 | 5310433 | S | 7016  | GGCCCCATTGCTTGGGCGGCTGCT  |    |   |
| ILMN_1806224 | KIAA0492  | XP_94938 | 1090609 | A | 5727  | GGCCCTATACCTGATCACCTCTAA  |    |   |
| ILMN_1807003 | ANXA11    | NP_66587 | 7380450 | I | 338   | TCACAGTT                  | 10 | - |
| ILMN_1807529 | PADI4     | NP_03651 | 5310653 | S | 2163  | GTCCCAGT                  | 1  | + |
| ILMN_1809585 | KIAA0319L | NP_87262 | 150392  | I | 5065  | GGACAGG                   | 1  | - |
| ILMN_1810229 | ARID4A    | NP_07537 | 3830228 | A | 4318  | GCCAAAGTATATGTTTCAGCAGTGT |    |   |
| ILMN_1811330 | FLJ20152  | NP_06187 | 1230022 | S | 2592  | AGGTACAC                  | 5  | - |
| ILMN_1811608 | FLJ14107  |          | 2900008 | S | 1503  | CACTCAGCACCCCTCCCAAAGAG   |    |   |
| ILMN_1811616 | KIAA1706  | NP_08513 | 6250685 | S | 4375  | CCCAGGA                   | 7  | + |
| ILMN_1812571 | RAB35     | NP_00685 | 5340243 | S | 2738  | GTGGGGA                   | 12 | - |

|              |         |          |         |   |      |                           |    |   |
|--------------|---------|----------|---------|---|------|---------------------------|----|---|
| ILMN_1812856 | ZSWIM1  | NP_54217 | 1260082 | S | 2094 | CTGACTCA                  | 20 | + |
| ILMN_1813139 | ANKDD1A | NP_87436 | 3290296 | S | 2807 | TCGGGGAAACTGTGTGTGCTGAAC  |    |   |
| ILMN_1813455 | SP110   | NP_53634 | 10546   | I | 1934 | CTTGAAGC                  | 2  | - |
| ILMN_1813746 | CORO2A  | NP_00338 | 4590554 | A | 1976 | CGCTGAA                   | 9  | - |
| ILMN_1814153 | IL9R    | NP_00217 | 290424  | A | 1990 | CTCTGAG                   |    | + |
| ILMN_1815121 | PLAGL1  | NP_00107 | 2230475 | A | 2085 | CCATCCCTCATGTGTTCTCAGCTGC |    |   |
| ILMN_1815668 | GTF2IP1 |          | 6200438 | S | 2314 | CAGCTGG                   | 7  | - |
| ILMN_2038776 | TXN     |          | 7610747 | S | 23   | CATCGGTCCTTACAGCCGCTCGTC  |    |   |



|                                                                                   |           |
|-----------------------------------------------------------------------------------|-----------|
| 89852902- Homo sapiens chromosome 14 o binding [gc FLJ14051; NM_01797 mRNA        | blue      |
| ATCACCTG/ PREDICTED: Homo sapiens similar to Williams Beuren s XM_93580 mRNA      | blue      |
| 13044316: PREDICTED: Homo sapiens hypothetical protein FLJ436 XM_93054 lncRNA     | blue      |
| 8382616-8 PREDICTED: Homo sapiens hypothetical protein LOC64: XM_93187 mRNA       | blue      |
| 22556843- Homo sapi membrane transport [ glucose tra MGC1188: NM_0010: mRNA       | blue      |
| 5GGCGACA Homo sapiens succinate dehydrogenase cor SDHAL1 NR_00326 mRNA            | blue      |
| 38114867- Homo sapi cytosolic ri regulation transferas GCN2; KIA, NM_0010: mRNA   | blue      |
| AAATGTAC PREDICTED: Homo sapiens similar to dicer1 (LOC64769 XM_93674 mRNA        | blue      |
| 22002600- PREDICTED: Homo sapiens similar to Dihydrofolate red XM_92815 mRNA      | blue      |
| 11197165( Homo sapi membrane small GTP: nucleotide RAP1; KRE' NM_0010: mRNA       | blue      |
| 42861220- Homo sapiens FLJ38717 protein (FLJ38717), FLJ40915 NM_0010( mRNA        | blue      |
| 37875474- Homo sapi integral to transport [ binding [gc CG7943; N NM_0334: mRNA   | blue      |
| 11071486: PREDICTED: Homo sapiens similar to RAN-binding prot: XM_93465 mRNA      | blue      |
| AACATGAC PREDICTED: Homo sapiens hypothetical protein FLJ407 XM_94209 mRNA        | blue      |
| 11151924: Homo sapi extracellul: immune re interleukin MGC1232( NM_0015( mRNA     | blue      |
| 16829066- PREDICTED: Homo sapiens hypothetical protein MGC1: XM_93048 mRNA        | blue      |
| 'AAGGTGG( PREDICTED: Homo sapiens solute carrier family 25 (car: XM_00113 mRNA    | blue      |
| iGCACAGT( PREDICTED: Homo sapiens hypothetical protein LOC64: XM_93646 mRNA       | blue      |
| 69239594- Homo sapi actin cytoskeleton [gc tropomyos: DKFZp313: NM_1982: mRNA     | blue      |
| 20339862: Homo sapiens amyotrophic lateral sclerosis 2 (juvenile) NM_1782: mRNA   | blue      |
| 15574998: PREDICTED: Homo sapiens similar to Fc receptor-like 5 XM_00113 mRNA     | blue      |
| 5923495-5 Homo sapi nucleus [gc DNA replic DNA-depe: MGC4816; NM_1828( mRNA       | blue      |
| 20171476- PREDICTED: Homo sapiens zinc finger protein 486 (ZNF: XM_37115 mRNA     | blue      |
| 46552207- Homo sapiens hypothetical protein MGC4093 (MGC40: NM_0305: mRNA         | blue      |
| 11598153: Homo sapiens tudor domain con zinc ion bir FLJ21082 NM_1987: mRNA       | blue      |
| 10007363: Homo sapi membrane ion transp: transporte SMCT; MG NM_1459: mRNA        | blue      |
| 34185801- Homo sapi endoplasr cell surfac: 1-phospha Pip4k2B; P NM_1386: mRNA     | blue      |
| 17351414- Homo sapi nucleus [gc response t transcription factor ac NM_0016: mRNA  | blue      |
| 11285135: PREDICTED: Homo sapiens similar to RAN-binding prot: XM_93099 mRNA      | blue      |
| 33779905- Homo sapiens chrom: protein fol unfolded p C21orf78 NM_0178: mRNA       | blue      |
| 49263889- Homo sapi nucleus [gc regulation DNA binding [goid 36: NM_0133( mRNA    | blue      |
| 42178233- PREDICTED: Homo sapiens similar to AI661453 protein XM_37182 mRNA       | grey      |
| 32906458- Homo sapi TAP compl immune re tapasin bir RING11; P: NM_0188: mRNA      | grey      |
| 27732933- Homo sapi nucleus [gc morphoge transcripti: TBR2 NM_0054: mRNA          | grey      |
| 11055200: Homo sapi membrane [goid 160: transferas NLRR-3; NI NM_0183: mRNA       | grey      |
| 18036576: Homo sapi membrane lipid metabolism [goid: BTNLR NM_0067( mRNA          | grey      |
| 14806725: PREDICTED: Homo sapiens similar to H3 histone, family XM_49771 mRNA     | grey      |
| 54174433- Homo sapi membrane metabolisr acyltransfe FLJ20481; NM_0178: mRNA       | grey      |
| TCAGGAA( Homo sapiens thioredoxin (TXN), mRNA. NM_0033: mRNA                      | turquoise |
| 8293227-8 Homo sapi intracellul: protein bic structural constituent NM_0010: mRNA | turquoise |
| 91411148- Homo sapiens growth cell differe protein bir DDIT2; CR: NM_0067( mRNA   | turquoise |
| 44615731- Homo sapi ribosome [ protein bic structural constituent NM_0010: mRNA   | turquoise |
| 18518435: Homo sapi integral to transport [ ATPase act MOAT-C; p NM_0010: mRNA    | turquoise |
| 11347139: Homo sapi heterotrim G-protein ( GTPase activity [goid : NM_0010: mRNA  | turquoise |
| 70442883- Homo sapiens LMBR1 domain containing 1 (ba810: NM_0183( mRNA            | turquoise |
| 5TTCTCGCT PREDICTED: Homo sapiens similar to 40S ribosomal prc XM_93643 mRNA      | turquoise |
| 36153798- Homo sapi membrane [goid 16020] [eviden: GLIPR2; G: NM_0223: mRNA       | turquoise |
| 20078363- Homo sapiens ribosor skeletal de transferas: pp90RSK2; NM_0045: mRNA    | turquoise |

|                                                                                  |                               |           |
|----------------------------------------------------------------------------------|-------------------------------|-----------|
| 4316893-4 PREDICTED: Homo sapiens similar to Ssu72 RNA polymerase II subunit 72  | XM_37234 mRNA                 | turquoise |
| TCCCAACA, Homo sapiens pre-B-cell pyridine nucleotidyl transferase               | DKFZP666I NM_00574 mRNA       | turquoise |
| 75454418- Homo sapiens integral to membrane [goid 16021] [evidence 1]            | NM_03192 mRNA                 | turquoise |
| 75346964- Homo sapiens extracellular blood coagulation factor serine-type 1      | UPA; URK; NM_00265 mRNA       | turquoise |
| 53063842- Homo sapiens zyg-11 homolog B binding [gc FLJ13456; ]                  | NM_02464 mRNA                 | turquoise |
| 44597523- Homo sapiens plasma membrane [gc protein bir SAR2; TSP1]               | NM_00225 mRNA                 | turquoise |
| 10190085- Homo sapiens DNA-directed transcription factor                         | RPB11; MCMC NM_00625 mRNA     | turquoise |
| 58332875- Homo sapiens hypothetical protein LOC284                               | FLJ46426 NM_00100 mRNA        | turquoise |
| 24652407- Homo sapiens membrane homophilic calcium ion channel                   | DLX2; DYLL1 NM_01480 mRNA     | turquoise |
| 90407224- Homo sapiens nucleus [gc response to stress transferase                | RLPK; MSP NM_00475 mRNA       | turquoise |
| ACATGTGC, PREDICTED: Homo sapiens hypothetical protein LOC64                     | XM_93610 lncRNA               | turquoise |
| GTCCACAT, Homo sapiens membrane [goid 1602] receptor                             | EGFL5 NM_00108 mRNA           | turquoise |
| 3756-3805 PREDICTED: Homo sapiens similar to CXYorf1-related protein             | XR_01761.1 mRNA               | turquoise |
| 14808089- Homo sapiens chromosomal nucleosomal DNA binding                       | H2a-615; H2A.1 NM_00351 mRNA  | turquoise |
| 6486367-6 Homo sapiens thioredoxin-like 5 electron carrier                       | TRP14; MCMC NM_03275 mRNA     | turquoise |
| 60710651- PREDICTED: Homo sapiens similar to hypothetical protein                | XM_92681 mRNA                 | turquoise |
| AGCTAAAG PREDICTED: Homo sapiens hypothetical protein LOC64                      | XM_93557 lncRNA               | turquoise |
| 15222988- Homo sapiens ribosome [protein biogenesis RNA binding                  | MPS-1; MFM1 NM_00105 mRNA     | turquoise |
| 68336908- Homo sapiens G protein-coupled receptor positive regulator             | C1orf139; NM_00100 mRNA       | turquoise |
| 1388309-1 Homo sapiens integral to plasma membrane receptor                      | CSF2R; CSF2R NM_17224 mRNA    | turquoise |
| 38299200- PREDICTED: Homo sapiens hypothetical protein LOC28                     | XM_37845 lncRNA               | turquoise |
| TGACTGCC PREDICTED: Homo sapiens hypothetical protein LOC64                      | 646424 (LC) XM_94126 mRNA     | turquoise |
| 19558234- Homo sapiens nucleus [gc regulation zinc ion binding                   | RAMP; SCL NM_00345 mRNA       | turquoise |
| 34634020- Homo sapiens protein phosphatase calcium ion dependent                 | G5pr; FLJ212 NM_01791 mRNA    | turquoise |
| 17128557- Homo sapiens membrane G-protein-coupled receptor                       | GPCR1; GP1R NM_01437 mRNA     | turquoise |
| 12664737- Homo sapiens hypothetical protein hydrolase                            | CSTP1 NM_01834 mRNA           | turquoise |
| 22371126- Homo sapiens intracellular small GTP-binding guanyl-nucleotide         | MGC11967; NM_15361 mRNA       | turquoise |
| 82593742- Homo sapiens cytoplasmic antibiotic resistance oxidoreductase          | NECAB2 NM_01906 mRNA          | turquoise |
| 18003717- Homo sapiens voltage-gated calcium ion channel voltage-gated           | CACH6; BII1 NM_00072 mRNA     | turquoise |
| 10734697- Homo sapiens mitochondrial electron transport disulfide oxidoreductase | E3; PHE3; INM_00010 mRNA      | turquoise |
| 23897916- Homo sapiens cytosolic [gc phototransduction [gc HRG4                  | NM_00514 mRNA                 | turquoise |
| 14805181- PREDICTED: Homo sapiens similar to H3 histone, family                  | XM_49771 mRNA                 | turquoise |
| AGCCCTTC, Homo sapiens membrane [goid 16020] [evidence 1]                        | CGI-119; ZNF119 NM_01605 mRNA | turquoise |
| 22664611- Homo sapiens intracellular intracellular signaling                     | SWIP1; WIP1 NM_01562 mRNA     | turquoise |
| 24707151- Homo sapiens SH3-binding domain protein                                | FLJ33845; NM_03064 mRNA       | turquoise |
| 61085713- Homo sapiens ubiquitin ubiquitin-cysteine peptidase                    | MGC13198; NM_00631 mRNA       | turquoise |
| 34459695- PREDICTED: Homo sapiens similar to SMT3 suppressor                     | XM_37252 mRNA                 | turquoise |
| 52083405- Homo sapiens AKT interacting ubiquitin-cysteine ubiquitin-protein      | FTS; FT1 NM_02247 mRNA        | turquoise |
| 10052019- Homo sapiens intracellular [goid 562 zinc ion binding                  | DKFZP667C NM_03096 mRNA       | turquoise |
| 12331650- Homo sapiens cell division cell cycle [goid 7049]                      | C10orf7; DNM1 NM_00602 mRNA   | turquoise |
| 23592413- Homo sapiens nucleus [gc regulation sequence-specific                  | NKX3A; BAK1 NM_00616 mRNA     | turquoise |
| 11337048- Homo sapiens lipid phosphate phosphatase zinc ion binding              | FLJ13055; NM_02275 mRNA       | turquoise |
| 45720017- Homo sapiens endoplasmic reticulum metabolic hydrolase                 | MGC12641; NM_19855 mRNA       | turquoise |
| 11190318- Homo sapiens interferon-gamma cell differentiation binding             | gc PC4; TIS7 NM_00155 mRNA    | turquoise |
| 11485989- PREDICTED: Homo sapiens similar to SMT3 suppressor                     | XM_00112 mRNA                 | turquoise |
| 13410774- Homo sapiens membrane cell differentiation GPI anchor                  | baA479K20. NM_03255 mRNA      | turquoise |
| ACTTTCCCA, PREDICTED: Homo sapiens similar to F15D3.1a (LOC39                    | XM_93727 mRNA                 | turquoise |
| 51243958- Homo sapiens dehydratase metabolic oxidoreductase                      | FLJ13639 NM_00105 mRNA        | turquoise |

|                                                                                     |           |
|-------------------------------------------------------------------------------------|-----------|
| 66796993- Homo sapi cell fractio signal tran: hydrolase : HCP1; PDE NM_00260 mRNA   | turquoise |
| 15708427- Homo sapi nucleus [g: cellular de: DNA bindir PYHIN3 NM_00243 mRNA        | turquoise |
| :TCGTGTCC Homo sapi nucleus [g: regulation transcripti E2FBP1; BF NM_00522 mRNA     | turquoise |
| 20210812- Homo sapiens chromosome Y open reading MGC13173 NM_00100 mRNA             | turquoise |
| 17492157- Homo sapi nucleus [g: transcripti: protein binding [goid : NM_00488 mRNA  | turquoise |
| GGTGGAGC Homo sapi nucleus [g: chloride tr: chloride ch RP11-475E NM_00104 mRNA     | turquoise |
| 46295471- Homo sapiens transdu: negative r: SH3/SH2 a MGC10479 NM_00574 mRNA        | turquoise |
| 12620016- Homo sapi nucleus [goid 5634] [e: structural i: MGC11141 NM_00557 mRNA    | turquoise |
| 76166279- Homo sapi plasma me blood coag thrombin r PAR2; GPR NM_00524 mRNA         | turquoise |
| VTGGTATCA PREDICTED: Homo sapiens similar to Fc fragment of IgC XM_94209 mRNA       | turquoise |
| 76866031- Homo sapiens chrom: pyridine n: kinase acti NRK1; bA2 NM_01788 mRNA       | turquoise |
| 88514916- Homo sapiens hydrox metabolisr oxidoredu: DHRS8; PA NM_01624 mRNA         | turquoise |
| 1491641-1 Homo sapi integral to cell surface receptor I SIRP-BETA: NM_00606 mRNA    | turquoise |
| 13756055- Homo sapi integral to response t cytokine bi CD119; IFN NM_00041 mRNA     | turquoise |
| 14606854- PREDICTED: Homo sapiens neuroblastoma breakpoint f XM_93402 mRNA          | turquoise |
| VTGGTAGT PREDICTED: Homo sapiens similar to hypothetical LOC: XM_94367 lncRNA       | turquoise |
| 24190563- Homo sapi contractile cell cycle [i: GTPase acti KIAA0158; NM_00100 mRNA  | turquoise |
| 8565844-8 Homo sapi membrane immune re sugar bindi CLEC6; MC NM_08038 mRNA          | turquoise |
| 18490806- Homo sapi nucleus [g: physiologi: oxidoredu: PHS-2; CO: NM_00096 mRNA     | turquoise |
| TCGAGTGG Homo sapi plasma me cell-cell sig zinc ion bir MGC12668 NM_00728 mRNA      | turquoise |
| 23252401- Homo sapiens ureido: nitrogen c: zinc ion bir BUP1 NM_01632 mRNA          | turquoise |
| 31198110- Homo sapi nucleus [goid 5634] [e: RNA polym: TAFII68; T: NM_13921 mRNA    | turquoise |
| 13357493- Homo sapi intracellul: small GTP: guanyl-nuc DKFZp781I NM_19867 mRNA      | turquoise |
| 13310682- Homo sapi membrane nitrogen c: hydrolase : FOAP-4; GI NM_07848 mRNA       | turquoise |
| 17995025- Homo sapi extracellul: regulation cytokine a: MGC8786; NM_05286 mRNA      | turquoise |
| :CATGGCC PREDICTED: Homo sapiens similar to ribosomal protein XM_94115 mRNA         | turquoise |
| 11205355- Homo sapiens thio red cell motilit thiol-disulf DKFZp686I NM_00332 mRNA   | turquoise |
| 14558593- Homo sapiens acid phosphatase hydrolase : PACPL1; A: NM_01636 mRNA        | turquoise |
| CTCCTGCG PREDICTED: Homo sapiens hypothetical protein LOC65: XM_94441 mRNA          | turquoise |
| 48763124- Homo sapi plasma me intracellul: kinase acti MGC3606; NM_00415 mRNA       | turquoise |
| 10483792- Homo sapi cytosol [goid 5829] [e: hydrolase : cN-II; NT5E NM_01222 mRNA   | turquoise |
| 10393633- Homo sapiens ubiquit ubiquitin c ligase activ E2(17)KB3: NM_18188 mRNA    | turquoise |
| TTCTCTCTCT Homo sapi nucleus [g: regulation sequence-: G17; PBX2 NM_00258 mRNA      | turquoise |
| 20531752- Homo sapiens 6-phos metabolisr kinase acti DKFZp781I NM_00621 mRNA        | turquoise |
| 22972970- PREDICTED: Homo sapiens hypothetical LOC440731, tr: XM_93369 lncRNA       | turquoise |
| 15376725- Homo sapi integral to membrane [goid 1602 FLJ32028 NM_15268 mRNA          | turquoise |
| 11488107- Homo sapi nucleus [g: regulation receptor a: PROSIT24C NM_01533 mRNA      | turquoise |
| :CGGGGAG Homo sapi lysosome [ceramide r transferas: AC; FLJ220 NM_17792 mRNA        | turquoise |
| 18591394- Homo sapi membrane metabolisr ligase activ FACL2; LA: NM_00199 mRNA       | turquoise |
| 48220757- Homo sapi extracellul: pregnancy [goid 7565 MGC22484 NM_00278 mRNA        | turquoise |
| 93486339- Homo sapi membrane [goid 16020] [eviden: KIAA1145 NM_02069 mRNA           | turquoise |
| 37676117- Homo sapi extracellul: cell motilit signal tran: TSP; THBS; NM_00324 mRNA | turquoise |
| 10159841- Homo sapi membrane transport [ transporte OATP-M1; NM_18099 mRNA          | turquoise |
| 10353434- Homo sapiens mening glycoprote hyaluronoi MEA5; FLJ: NM_01221 mRNA        | turquoise |
| 21912437- Homo sapi nucleus [g: regulation sequence-: HB24 NM_02199 mRNA            | turquoise |
| 45721550- Homo sapi endoplasr metabolisr hydrolase : MGC12641 NM_01883 mRNA         | turquoise |
| 11378458- Homo sapiens RNA bi: meiosis [g: RNA bindir FLJ11153 NM_01609 mRNA        | turquoise |
| 27865202- Homo sapi membrane anti-apopt protein bir IFI-6-16; 6- NM_00203 mRNA      | turquoise |

|                                                                                   |           |
|-----------------------------------------------------------------------------------|-----------|
| CTTAGACA PREDICTED: Homo sapiens similar to ribosomal protein XM_94115 mRNA       | turquoise |
| 48241909- Homo sapi extracellular region [goid 5576] [ LL37; FALL NM_00434 mRNA   | turquoise |
| 3012033-3 Homo sapi membrane cell differe receptor a CD266; TM NM_01663 mRNA      | turquoise |
| 38159368- Homo sapi nucleus [gc DNA repair DNA bindir FLJ46828; NM_15226 mRNA     | turquoise |
| 19154862: Homo sapi nucleus [gc transcripti transcripti ISGF-3; ST/ NM_13926 mRNA | turquoise |
| 48842368- Homo sapi plasma me cell motilit GPI anchor CD87; UPA NM_00100 mRNA     | turquoise |
| 3067402-3 PREDICTED: Homo sapiens hypothetical protein LOC641 XM_93337 mRNA       | turquoise |
| 31031334- Homo sapi alpha-keto branched c kinase activity [goid 1 NM_00588 mRNA   | turquoise |
| 65170462- Homo sapi integral to chemotaxi cytokine a CKLFH; CKI NM_18130 mRNA     | turquoise |
| ACTGAGCA. PREDICTED: Homo sapiens hypothetical protein LOC641 XM_94304 lncRNA     | turquoise |
| 67924838- Homo sapi nucleus [gc apoptosis [goid 6915] GADD45; I NM_00192 mRNA     | turquoise |
| GTACAAGG Homo sapi clathrin co morphoge binding [gc CLH22; CL1 NM_00705 mRNA      | turquoise |
| 49122497- Homo sapi ribosome [ protein bic structural constituent NM_00103 mRNA   | turquoise |
| 14808981( PREDICTED: Homo sapiens similar to Histone H2A.o (H2 XM_92838 mRNA      | turquoise |
| 17796264: Homo sapi nucleus [gc protein arr ATP bindin DKFZp686; NM_02066 mRNA    | turquoise |
| ACCGAGAG Homo sapi plasma me cell-cell sig zinc ion bir NEP; MGC: NM_00090 mRNA   | turquoise |
| 50441973- Homo sapiens phosphr glycogen n pyridoxal phosphate k NM_00286 mRNA     | turquoise |
| 10514353- Homo sapiens ropporin 1-like (ROPN1L), mRASP; FLJ25 NM_03191 mRNA       | turquoise |
| 81530777- Homo sapi nucleus [gc regulation of transcrip BCE-1; ESG NM_00700 mRNA  | turquoise |
| 48319749- Homo sapiens RNA bi RNA proce RNA bindir RNPL; IS1-I NM_00101 mRNA      | turquoise |
| TCGACCG( PREDICTED: Homo sapiens H3 histone, family 3A pseud XR_01783: mRNA       | turquoise |
| 91149642- Homo sapi cytoplasm immune re binding [gc RNM561; I NM_00154 mRNA       | turquoise |
| 13481379- Homo sapiens ubiquit ubiquitin-c calcium-de DFFRY; SP: NM_00465 mRNA    | turquoise |
| 10174011- Homo sapi integral to phagocyto pattern rex BGR; DECT NM_19795 mRNA     | turquoise |
| 17453502: Homo sapi nucleus [gc regulation transcription corepre: NM_00386 mRNA   | turquoise |
| 13918925- Homo sapi nucleus [goid 5634] [e binding [gc UTY1; DKF: NM_18265 mRNA   | turquoise |
| 15116681: Homo sapi actin cytos regulation actin bindi D3S1319E; NM_05302 mRNA    | turquoise |
| 70023312- Homo sapi nucleus [gc cell prolife transcripti MGC10465 NM_00235 mRNA   | turquoise |
| 43834109- Homo sapi membrane metabolisr oxidoredu KAR NM_01614 mRNA               | turquoise |
| 24150565- Homo sapi nucleus [gc nuclear mf RNA bindir Ht006; SF3 NM_01604 mRNA    | turquoise |
| CTGCCCGC PREDICTED: Homo sapiens similar to H3 histone, family XM_93792 mRNA      | turquoise |
| 11856670: Homo sapiens hypothetical protein LOC283: MGC12544 NM_00103 mRNA        | turquoise |
| 12907768- Homo sapi nucleus [gc protein arr calmodulir CKLiK; CaV NM_02035 mRNA   | turquoise |
| 3934-3983 PREDICTED: Homo sapiens similar to CXYorf1-related p XR_01761: mRNA     | turquoise |
| 37187233- Homo sapi intracellul: immune re transferas PRKR; PKR NM_00275 mRNA     | turquoise |
| iAGGAAAC( Homo sapi cytoskelet: barrier sep cytoskelet: MGC14978 NM_01868 mRNA    | turquoise |
| 32161087- Homo sapi membrane [goid 16020] [evidenc FLJ90675; NM_02213 mRNA        | turquoise |
| 37770607- Homo sapi cytoplasm rRNA proci exonuclea: RP11-3J10 NM_00100 mRNA       | turquoise |
| AGCAGACA PREDICTED: Homo sapiens similar to CG7889-PA, transi XM_94293 mRNA       | turquoise |
| 19104754: Homo sapiens regulat regulation calmodulir GOS8 NM_00292 mRNA           | turquoise |
| 67689479- PREDICTED: Homo sapiens hypothetical protein LOC641 XM_92886 mRNA       | turquoise |
| 44510871- Homo sapi intracellul: protein arr enzyme ac MGC12686 NM_00487 mRNA     | turquoise |
| 56780689- PREDICTED: Homo sapiens similar to Ubiquinol-cytochr XM_92804 mRNA      | turquoise |
| 65144146- Homo sapi integral to macropha: chemokine UCK-1; CKI NM_01632 mRNA      | turquoise |
| 132565798 Homo sapiens nudix (nucleoside diphosphat FLJ20525 NR_00294 mRNA        | turquoise |
| 14307218: PREDICTED: Homo sapiens similar to peptidyprolyl isor XM_92776 mRNA     | turquoise |
| 2962146-2 Homo sapiens NAD(P) electron tr zinc ion bir DHQV; DIA NM_00090 mRNA    | turquoise |
| 15177380( Homo sapi ruffle [goic cell-cell sig protein ho PRA; CABP NM_01462 mRNA | turquoise |

|                                                                                                            |           |
|------------------------------------------------------------------------------------------------------------|-----------|
| CCTGAGGA PREDICTED: Homo sapiens family with sequence similar to XM_00112 mRNA                             | turquoise |
| GGCTTTGTC Homo sapiens family with sequence similar to MGC45871 NM_18270 mRNA                              | turquoise |
| 17807132: Homo sapiens nucleus [glucuronidase RNA polymerase II; TCF1 NM_00564 mRNA                        | turquoise |
| CTGTGGGG Homo sapiens extracellular cell-cell signaling signal transduction CFAG; MAF NM_00296 mRNA        | turquoise |
| CATTACC PREDICTED: Homo sapiens hypothetical LOC440160 (LOC XM_49857 mRNA                                  | turquoise |
| 72067992- Homo sapiens membrane [glycophorin receptor and CD331H24. NM_02457 mRNA                          | turquoise |
| 9998450-9 Homo sapiens retinol transport [retinal binding CRBP4; MAF NM_05296 mRNA                         | turquoise |
| 48399408- Homo sapiens chromosome 22 open reading frame 34 NM_00103 mRNA                                   | turquoise |
| CGGGCAGT Homo sapiens plasma membrane homophilic protein homolog PVRR2; HV NM_00285 mRNA                   | turquoise |
| 15851759( Homo sapiens hypothetical protein protein bir DKFZp686I NM_14472 mRNA                            | turquoise |
| 94892061- Homo sapiens cytosol [glucosyltransferase lyase activity HSTD; histone NM_00210 mRNA             | turquoise |
| 63928321- Homo sapiens endoplasmic reticulum metabolic hydrolase KIAA1001 NM_01496 mRNA                    | turquoise |
| ACCAACTC Homo sapiens ubiquitin ubiquitin-c ubiquitin thiolase MGC2621; NM_00515 mRNA                      | turquoise |
| 22953563( Homo sapiens exocyst protein transmembrane protein bir Exo84p; SE NM_17587 mRNA                  | turquoise |
| 34816549- Homo sapiens nucleus [glucuronidase DNA binding TRIP2; PPA NM_00477 mRNA                         | turquoise |
| GAGAGATA PREDICTED: Homo sapiens dehydrogenase/reductase (NADPH) XM_00113 mRNA                             | turquoise |
| 23855914- Homo sapiens integral to cell motility nucleotide LTBR1; P21 NM_18165 mRNA                       | turquoise |
| 51285425- PREDICTED: Homo sapiens hypothetical protein FLJ373 XR_00060: lncRNA                             | turquoise |
| 74973428- Homo sapiens mitochondrion glycolysis [kinase activity HKII; HXK2 NM_00018 mRNA                  | turquoise |
| 54546773- Homo sapiens ribosome [protein biogenesis structural constituent NM_00101 mRNA                   | turquoise |
| 97673262- Homo sapiens integral to membrane transferase KIAA1079; NM_01491 mRNA                            | turquoise |
| 1716348-1 Homo sapiens transforming, acidic coiled-coil MGC13324 NM_00634 mRNA                             | turquoise |
| 75103777- Homo sapiens plasma membrane cellular density coreceptor MD-2 NM_01536 mRNA                      | turquoise |
| 42795187- Homo sapiens extracellular immune response MHC class I receptor alpha NM_00404 mRNA              | turquoise |
| 32030109- Homo sapiens chromosome 12 open reading frame FLJ20696; NM_01816 mRNA                            | turquoise |
| 39061214- Homo sapiens trinucleotide repeat nucleotide KIAA1093 NM_00102 mRNA                              | turquoise |
| 99472880- Homo sapiens nucleus [glucocorticoid regulation zinc ion binding MGC13842 NM_00343 mRNA          | turquoise |
| 15986014( Homo sapiens membrane immune response receptor alpha CD16b; FC gamma 2R1 NM_00057 mRNA           | turquoise |
| 28692285- Homo sapiens nucleus [glucocorticoid positive response sequence-1 CRE-BPA NM_00101 mRNA          | turquoise |
| 15970908- Homo sapiens integral to cell surface receptor alpha hIL-17R; IL-17R1 NM_01433 mRNA              | turquoise |
| 15702493( Homo sapiens integral to protein arrangement transmembrane PTPRP; ICA NM_13084 mRNA              | turquoise |
| 17932641( Homo sapiens integral to apoptosis   zinc ion binding G1RZFP; N NM_01843 mRNA                    | turquoise |
| CTCCAGGC PREDICTED: Homo sapiens hypothetical protein LOC641 XM_94196 lncRNA                               | turquoise |
| 1818688-1 Homo sapiens troponin regulation actin binding DA2B; AMI NM_00328 mRNA                           | turquoise |
| 15162923( Homo sapiens extracellular inflammatory calcium ion channel CFAG; 60B NM_00296 mRNA              | turquoise |
| 71528496- Homo sapiens membrane folic acid transporter folic acid binding FR-gamma NM_00080 mRNA           | turquoise |
| 27841663- Homo sapiens cyclin-dependent brain development cadherin beta p35nck5a; NM_00388 mRNA            | turquoise |
| 38474336- Homo sapiens plasma membrane positive response transferase KIAA0012; NM_00326 mRNA               | turquoise |
| 8226343-8 Homo sapiens large ribosomal protein biogenesis structural constituent NM_00098 mRNA             | turquoise |
| 11613369( Homo sapiens extracellular acute-phase binding [glucanase AGP2; AGF NM_00060 mRNA                | turquoise |
| 3811452-3 Homo sapiens nucleus [glucocorticoid B cell differentiation transcript BGF; ZF9; 5 NM_00130 mRNA | turquoise |
| 77415032- Homo sapiens membrane respiratory leukotriene receptor CYSLTR; M NM_00663 mRNA                   | turquoise |
| 3918-3967 PREDICTED: Homo sapiens similar to similar to RPL23A1 XM_92728 mRNA                              | turquoise |
| 15634207- Homo sapiens endoplasmic reticulum leukotriene iron ion binding CPF3; CYP4 NM_00089 mRNA         | turquoise |
| 13391737- Homo sapiens phosphatase and protein phosphatase RPEL; MGC NM_03094 mRNA                         | turquoise |
| 52892908- Homo sapiens protein protein membrane protein-L-1 FLJ10883 NM_05293 mRNA                         | turquoise |
| 49120092- Homo sapiens ribosome [protein biogenesis structural constituent NM_00103 mRNA                   | turquoise |
| 193631-19 PREDICTED: Homo sapiens hypothetical protein LOC641 XM_92804 mRNA                                | turquoise |



|           |                                                              |           |           |           |
|-----------|--------------------------------------------------------------|-----------|-----------|-----------|
| 13005821  | Homo sapi Golgi apparatus [goid protein bir MGC2067          | NM_0044   | mRNA      | turquoise |
| 89330079- | PREDICTED: Homo sapiens similar to 40S ribosomal prc         | XM_92818  | mRNA      | turquoise |
| 52968633- | Homo sapiens RNA, 7SK, nuclear (RN7SK) or 7SK                | NR_00144. | mRNA      | turquoise |
| 13869775- | Homo sapi nucleus [goid 5634] [ε binding [gc UTY1; DKF.      | NM_0071   | mRNA      | turquoise |
| 78692404- | Homo sapi actin cytos regulation signal tran: MGC1330        | NM_0024   | mRNA      | turquoise |
| 13564383  | Homo sapi soluble fra regulation Rab GTPas RAB3GAP; NM_0122  | mRNA      | turquoise |           |
| 60091988- | Homo sapi plasma me immune re receptor a CD89                | NM_1332   | mRNA      | turquoise |
| 59290134- | Homo sapiens osteoclast-associa receptor a MGC3361           | NM_1307   | mRNA      | turquoise |
| 10289291- | Homo sapi microtubul neuomus ATPase act KIAA0591; NM_1834    | mRNA      | turquoise |           |
| 64481496- | Homo sapiens PHD fir regulation zinc ion bir MGC1422         | NM_0151   | mRNA      | turquoise |
| 20278583  | Homo sapi nucleus [gc protein sta zinc ion bir MDMX; Dk      | NM_0023   | mRNA      | turquoise |
| 32597972- | Homo sapi nucleus [gc chromatin transcripti Epl1; DKFZ       | NM_0252   | mRNA      | turquoise |
| 55386776- | Homo sapi cytoskelet mitotic spi RNA bindir MIG14; M         | NM_0036   | mRNA      | turquoise |
| 15797981  | Homo sapi membrane regulation protein bir CASP; CYTI         | NM_0042   | mRNA      | turquoise |
| 17642594  | Homo sapi nucleus [gc apoptosis   zinc ion bir Zfp346; JA    | NM_0122   | mRNA      | turquoise |
| 75006821- | Homo sapi nucleus [gc regulation protein dir JUNDM2          | NM_1304   | mRNA      | turquoise |
| 48486565- | Homo sapi membrane ion transp transporte MGC1325             | NM_0010   | mRNA      | turquoise |
| TTATCAGA  | PREDICTED: Homo sapiens similar to H3 histone, family        | XM_00112  | mRNA      | turquoise |
| 15161298  | Homo sapi insoluble fixenobiotic zinc ion bir CAAF1; CA      | NM_0056   | mRNA      | turquoise |
| 16594166  | Homo sapiens RCSD domain cont kinase acti RP3-503M           | NM_0528   | mRNA      | turquoise |
| 1388406-1 | Homo sapi integral to plasma me receptor a CSF2R; CSF        | NM_1722   | mRNA      | turquoise |
| 31715625- | Homo sapiens antagonist of mitotic exit network 1 hon        | NM_2073   | mRNA      | turquoise |
| 81587223- | Homo sapi membrane [goid 16020] [evidence NAS]; int          | NM_0230   | mRNA      | turquoise |
| 42915789- | Homo sapiens chromosome 7 open reading MGC2821; NM_0240      | mRNA      | turquoise |           |
| 15843922  | Homo sapiens synaptojanin 2 (SY RNA bindir KIAA0348; NM_0038 | mRNA      | turquoise |           |
| 13116239- | Homo sapi membrane protein transport [goi SYN10; hsy         | NM_0037   | mRNA      | turquoise |
| 30360904- | Homo sapi membrane ubiquitin c zinc ion bir RNF189; R        | NM_0010   | mRNA      | turquoise |
| 45889570- | Homo sapiens aarF domain cont kinase acti COQ8; FLJ          | NM_0248   | mRNA      | turquoise |
| 52320501- | Homo sapiens tripartite motif-co zinc ion bir Z147; ZNF      | NM_0050   | mRNA      | turquoise |
| 19756814  | Homo sapiens ankyrin repeat domain 44 (A MGC7044             | NM_1536   | mRNA      | turquoise |
| 13877579  | Homo sapiens heme binding protein 2 (HEBI RP3-422G           | NM_0143   | mRNA      | turquoise |
| 34260200- | Homo sapi ribosome [ protein bic structural ( MGC1173        | NM_0009   | mRNA      | turquoise |
| 20225225- | Homo sapiens chromosome Y open reading frame 15B             | NM_0325   | mRNA      | turquoise |
| 10772071  | Homo sapi integral to immune re tumor nec ZTNF4; TAI         | NM_0065   | mRNA      | turquoise |
| 69730861- | Homo sapi cytoplasm antimicrob protein kin GIG3; MOF         | NM_0038   | mRNA      | turquoise |
| 19042121  | Homo sapiens regulat negative re signal tran: RGS13          | NM_1307   | mRNA      | turquoise |
| 15199374  | Homo sapiens paraneoplastic antigen like 6 MGC1582           | NM_0328   | mRNA      | turquoise |
| 70533801- | Homo sapiens serglycin (SRGN), mRNA. PRG1; PPG               | NM_0027   | mRNA      | turquoise |
| 14589154- | Homo sapi nucleus [gc ubiquitin-c threonine MGC2285          | NM_1489   | mRNA      | turquoise |
| 14886661  | Homo sapiens endosu transport [ ion channe MGC4319; NM_2071  | mRNA      | turquoise |           |
| 12157899  | Homo sapiens chromosome 10 open readin FLJ36756; NM_0248     | mRNA      | turquoise |           |
| 61282171- | Homo sapi nucleus [gc positive re transcripti HIF-1alpha     | NM_0015   | mRNA      | turquoise |
| 89219327- | Homo sapiens RNA binding motif protein, X-KAT3               | NM_0196   | mRNA      | turquoise |
| 26655419- | Homo sapi integral to plasma membrane [gc EVDB; D17          | NM_0064   | mRNA      | turquoise |
| 10920476  | Homo sapiens insulin glucose m receptor activity [goic       | NM_0037   | mRNA      | turquoise |
| 88129409- | Homo sapi ER-Golgi in angiogene: metallope APN; gp15         | NM_0011   | mRNA      | turquoise |
| CCGAATG   | PREDICTED: Homo sapiens membrane bound O-acyltra             | XM_00113  | mRNA      | turquoise |
| 23963544  | Homo sapi nucleus [gc B cell diffe transcripti HD4; HDA      | NM_0060   | mRNA      | turquoise |

|                                                                                     |           |
|-------------------------------------------------------------------------------------|-----------|
| 42355401- Homo sapi nucleus [g]regulation zinc ion bir FLJ23765; NM_15265 mRNA      | turquoise |
| :ACCTAGGC Homo sapi integral to G-protein (5-oxo-6E,8 GPR170; G NM_14896 mRNA       | turquoise |
| 12778030 Homo sapi nucleus [g]protein arr transferas MEKK2; M NM_00666 mRNA         | turquoise |
| 11343382 Homo sapiens hypothetical protein LOC552891 (LOC55 NM_00412 mRNA           | turquoise |
| 72657673- Homo sapiens RNA bi nuclear m f mRNA binc S164; MG NM_02123 mRNA          | turquoise |
| 18186212( Homo sapi Arp2/3 prc cell motilit structural ( ARC16; dJ1 NM_00571 mRNA   | turquoise |
| 31836086- Homo sapi chromosor nucleosom DNA binding [goid 36; NM_00101 mRNA         | turquoise |
| 33021836- Homo sapi endoplasr nucleotide hydrolase : MGC2733; NM_00106 mRNA         | turquoise |
| 12856899- Homo sapi ribosome [ protein bic structural ( PP9932 NM_00106 mRNA        | turquoise |
| 55431745- Homo sapiens ankyrin repeat domain 55 (A FLJ11795; NM_02466 mRNA          | turquoise |
| :ATGGTGT PREDICTED: Homo sapiens similar to 60S ribosomal prc XM_94221 mRNA         | turquoise |
| 15342563- Homo sapi membrane developm e hydrolase : CD157 NM_00433 mRNA             | turquoise |
| 43502841- Homo sapi chromatin chromatin chromatin M31; HP1 NM_00686 mRNA            | turquoise |
| :GTCCTGT( PREDICTED: Homo sapiens similar to general transcript XM_93575 mRNA       | turquoise |
| 60706623- PREDICTED: Homo sapiens similar to hypothetical prot e XM_92681 mRNA      | turquoise |
| 8577850-8 Homo sapi membrane immune re sugar bindi CLECSF9; N NM_01435 mRNA         | turquoise |
| 54527196- Homo sapiens chromosome 20 open readin; HSPC164; ! NM_01646 mRNA          | turquoise |
| 7309013-7 Homo sapiens proteir protein arr ATP binding [goid 552 NM_00276 mRNA      | turquoise |
| 15484653( Homo sapi plasma me induction c transferas CD282; TIL NM_00326 mRNA       | turquoise |
| 34940976- Homo sapi nucleus [g]cytoplasm ubi quitin p IKBA; NFKE NM_02052 mRNA      | turquoise |
| 36019743- Homo sapi integral to transport [ transporte TAT1; FLJ3 NM_05296 mRNA     | turquoise |
| 19677239; Homo sapi intracellul e ubi quitin c ligase activ DKFZp686I NM_02076 mRNA | turquoise |
| :CAAGTTTC PREDICTED: Homo sapiens hypothetical protein FLJ120 XR_00126; lncRNA      | turquoise |
| 14326989- Homo sapi cytoskelet r regulation actin bindi TB4Y; MG NM_00426 mRNA      | turquoise |
| :CTTGTTCC Homo sapiens metallophosphoe: hydrolase activity [goi NM_02307 mRNA       | turquoise |
| 39045111- Homo sapiens leucine small GTP e binding [g RIPK7; RO NM_19857 mRNA       | turquoise |
| 32901537- Homo sapi TAP compl protein cor tapasin bir APT2; RIN NM_00054 mRNA       | turquoise |
| 85379025- Homo sapi coated pit protein cor clathrin bir LAP; CALM NM_00716 mRNA     | turquoise |
| 61941594- Homo sapi nucleus [g]chromatin ATP bindin FLJ20361; NM_01778 mRNA         | turquoise |
| 23784959- Homo sapi membrane homophilic calcium ior CDw325; C NM_00179 mRNA         | turquoise |
| 60232730- PREDICTED: Homo sapiens similar to pleckstrin homolo XM_93518 mRNA        | turquoise |
| 57945667- Homo sapiens proteir glycogen n protein ph PPP1R6; D NM_00624 mRNA        | turquoise |
| 75269880- Homo sapiens oxyster lipid transport [goid 6 ORP8; MG NM_00106 mRNA       | turquoise |
| 21870990; Homo sapi integral to neutrophil receptor a CD182; CN NM_00155 mRNA       | turquoise |
| 46828278- Homo sapiens ankyrir intracellular signaling FLJ21255; NM_02409 mRNA      | turquoise |
| :CTGTGGTC Homo sapiens paraneoplastic an zinc ion bir MGC13275 NM_01336 mRNA        | turquoise |
| 21982328; Homo sapi microtubul microtubu GTP bindin TUBA1; H2 NM_00606 mRNA         | turquoise |
| 12377564; Homo sapiens deltex 3-like (Dros zinc ion bir BBAP NM_13828 mRNA          | turquoise |
| 52026216- Homo sapiens oxyster lipid transport [goid 6 FLJ14629; NM_02458 mRNA      | turquoise |
| 53042762- Homo sapi membrane G-protein ( receptor a GPCR4; EX NM_02037 mRNA         | turquoise |
| :AACCATGT Homo sapiens SUMO1 pseudogene 1 (SUMO1P1) on cl NR_00218; mRNA            | turquoise |
| 2269595-2 Homo sapi cornified e skin develc GTPase act MGC12624 NM_00324 mRNA       | turquoise |
| 12050538; Homo sapi extracellul: regulation growth fac IGFBP9; N NM_00251 mRNA      | turquoise |
| 11188207( Homo sapi membrane [goid 160; calmodulir ADDL NM_01682 mRNA               | turquoise |
| ATCACATT( Homo sapi centrosome [goid 581 protein bir MGC78416 NM_02518 mRNA         | turquoise |
| 74955506- Homo sapi extracellul: negative r e enzyme ac GROa; GR NM_00151 mRNA      | turquoise |
| TATTACCT( Homo sapiens lines homolog 1 (Drosophila) FLJ10583; NM_00104 mRNA         | turquoise |
| 5426395-5 Homo sapiens similar to zinc finger protein 469 (LOC44 NM_00101 mRNA      | turquoise |

|                                                                                     |           |
|-------------------------------------------------------------------------------------|-----------|
| 15454347- Homo sapi nucleus [gcrregulation DNA bindir MGC74712; NM_03322; mRNA      | turquoise |
| 3257423-3 PREDICTED: Homo sapiens hypothetical protein FLJ396 XM_37093; lncRNA      | turquoise |
| 26207885- Homo sapi nucleus [gcrchromatin chromatin HP1-GAM1; NM_01658; mRNA        | turquoise |
| 83500277- Homo sapi extracellular region [goid 5576] [ DKFZP434I; NM_03147; mRNA    | turquoise |
| 29648-296 PREDICTED: Homo sapiens similar to Proline-rich nucle; XM_93121; mRNA     | turquoise |
| 10515631; Homo sapi membrane fraction [goid 5624] [ p63; CLIM1; NM_00682; mRNA      | turquoise |
| 100100006; Homo sapiens dJ341D10.1 (novel protein) (dJ341D10.1; NM_00100            | turquoise |
| 10224110; Homo sapi cytoplasm ubiquitin c transferas; Fbl13; FLJ3; NM_14503; mRNA   | turquoise |
| 93779668- Homo sapi nucleus [gcrnegative r; ATP bindin TAF172; KI; NM_00397; mRNA   | turquoise |
| 37978594- Homo sapi nucleus [gcrregulation transcripti; TCFL4; MX; NM_17060; mRNA   | turquoise |
| 71639809- Homo sapi integral to positive re cell adhesi; SDFR1; GP; NM_01242; mRNA  | turquoise |
| 77044806- Homo sapi membran; electron tr oxidoreductase activi; NM_00186; mRNA      | turquoise |
| 16565165; Homo sapi nucleus [gcrregulation sequence-; OCT1; OTF; NM_00265; mRNA     | turquoise |
| 15477974- Homo sapiens BMX n; mesoderm transferas; PSCTK2; P; NM_00172; mRNA        | turquoise |
| 44078320- Homo sapi extracellul; peptidogly zinc ion bir MMP-9; GI; NM_00495; mRNA  | turquoise |
| 18179160; Homo sapi cytosol [gocellular de; electron c; p67phox; I; NM_00043; mRNA  | turquoise |
| 13313238- Homo sapiens testis-specific transcript, Y-lin; DKFZP434I; NR_00154; mRNA | turquoise |
| 10187692; Homo sapiens mitoge protein kin transferas; KIAA0687; NM_14568; mRNA      | turquoise |
| 30236347- Homo sapi membran; leukotrien; enzyme ac FLAP NM_00162; mRNA              | turquoise |
| 32935355- Homo sapi cytosol [goimmune re threonine ; MGC70470; NM_14895; mRNA       | turquoise |
| 35908947- Homo sapi nucleus [gcrprotein kin transferas; SFRSK1 NM_00313; mRNA       | turquoise |
| 65179379- Homo sapi membran; chemotaxi; cytokine a; MGC39436; NM_14467; mRNA        | turquoise |
| 21905403; Homo sapiens MOCO sulphurase C-terminal; FLJ22390; NM_02274; mRNA         | turquoise |
| 18576492- Homo sapi integral to ubiquitin c ligase activ; KIAA0161; NM_18275; mRNA  | turquoise |
| 90572750- Homo sapiens ankyrin repeat domain 22 (A); MGC22805; NM_14455; mRNA       | turquoise |
| 11411493- Homo sapiens CUG tri neuromus; RNA bindir BRUNOL3; NM_00102; mRNA         | turquoise |
| TCCAAGTG PREDICTED: Homo sapiens hypothetical protein LOC64; XM_93891; mRNA         | turquoise |
| 6749666-6 Homo sapi nucleus [goid 5634] [ r; magnesiun; MIG9 NM_00598; mRNA         | turquoise |
| 48463849- Homo sapi membran; defense response [go; PSG11 NM_00278; mRNA             | turquoise |
| 39484301- Homo sapi nucleus [gcrregulation of transcri; C21orf107; NM_03365; mRNA   | turquoise |
| 128882396; Homo sapiens ankyrir protein bic protein bir; BPOZ; PP2; NM_17202; mRNA  | turquoise |
| 92520593- Homo sapiens solute carrier family 36 (prot; FLJ38932; NM_15231; mRNA     | turquoise |
| 198642746; Homo sapi DNA-direct transcripti; DNA bindir; FLJ12859; NM_01248; mRNA   | turquoise |
| 39243212- Homo sapiens chromosome 1 open reading STRF2; FLJ; NM_02455; mRNA         | turquoise |
| 66859320- Homo sapi nucleus [gcrintracellul; transferas; C15orf1; P; NM_00630; mRNA | turquoise |
| ATGGCTCA PREDICTED: Homo sapiens hypothetical gene supporte; XM_93995; mRNA         | turquoise |
| 93094373- Homo sapiens small Cajal body-specific RNA Z32; mgU2; NR_00256; lncRNA    | turquoise |
| ATGGGGGA Homo sapi mitochond neurotrans; pyridoxal r; NPD009; G; NM_02068; mRNA     | turquoise |
| GTATTTTC; Homo sapi chromatin chromatin hydrolase ; KIAA1564; NM_02092; mRNA        | turquoise |
| AAACATGA; PREDICTED: Homo sapiens KIAA0492 protein (KIAA049; XM_94429; mRNA         | turquoise |
| 81930715- Homo sapi nucleus [gcrimmune re calcium-de; ANX11; CA; NM_14586; mRNA     | turquoise |
| 17562982- Homo sapi nucleus [gcrchromatin protein-ar; PADI5; PDI; NM_01238; mRNA    | turquoise |
| 35677307- Homo sapi membran; homophilic; calcium ior; PP791; RP; NM_18268; mRNA     | turquoise |
| GCCCAGGA; Homo sapi chromatin transcripti; transcripti; RBP1; RBP; NM_02300; mRNA   | turquoise |
| 16526589- Homo sapiens hypothetical protein FLJ2015; FLJ22179; NM_01900; mRNA       | turquoise |
| CGCCCCCT; PREDICTED: Homo sapiens hypothetical protein FLJ141; XR_01796; mRNA       | turquoise |
| 36307365- Homo sapi intracellular [goid 562 sequence-specific DN; NM_03063; mRNA    | turquoise |
| 119017396; Homo sapi membran; small GTP; GTP bindin; RAB1C; H-; NM_00686; mRNA      | turquoise |

|                                                                          |                          |           |
|--------------------------------------------------------------------------|--------------------------|-----------|
| 43947237- Homo sapiens zinc finger, SWIM- zinc ion bir C20orf162         | NM_080606 mRNA           | turquoise |
| 5AGTACGT( Homo sapiens ankyrin signal transduction protein bir           | MGC12030( NM_182706 mRNA | turquoise |
| 23074466( Homo sapiens nucleus [growth regulation] zinc ion bir          | FLJ22835; NM_080422 mRNA | turquoise |
| 99926695- Homo sapiens coronin nitrogen catabolite-inducible             | WDR2; CLI NM_003388 mRNA | turquoise |
| 15489351( Homo sapiens integral to cell proliferation receptor a         | CD129 NM_002188 mRNA     | turquoise |
| 5CACTGGCT( Homo sapiens nucleus [growth] positive regulatory DNA binding | MGC12627; NM_001088 mRNA | turquoise |
| 74241769- Homo sapiens general transcription factor II WSCR7             | NR_002200 mRNA           | turquoise |
| 5GACTCCA( Homo sapiens thioredoxin (TXN), mRNA.                          | NM_003322 mRNA           | turquoise |
