# Supplementary material for: The ceRNA Crosstalk between mRNAs and lncRNAs in Diabetes Myocardial Infarction
Source: Hindawi journal article supplement (doi:10.1155/2022/4283534), 2022-05-09
Supplement: f6 [file 4283534.f6.pdf]

| <b>Gene Name</b> | <b>Group</b> | <b>Degree</b> |
|------------------|--------------|---------------|
| DNAJC3-DT        | lncRNA       | 14            |
| LINC00921        | lncRNA       | 13            |
| AC108134.3       | lncRNA       | 9             |
| AL445524.1       | lncRNA       | 7             |
| AC114980.1       | lncRNA       | 5             |
| CYORF15A         | mRNA         | 4             |
| PRKY             | mRNA         | 4             |
| CYORF15B         | mRNA         | 4             |
| OSBPL8           | mRNA         | 31            |
| UBE2D3           | mRNA         | 208           |
| UTY              | mRNA         | 4             |
| PPP1R12A         | mRNA         | 156           |
| NPTN             | mRNA         | 58            |
| HSD17B11         | mRNA         | 27            |
| TMSB4Y           | mRNA         | 4             |
| CIR              | mRNA         | 108           |
| CEP63            | mRNA         | 34            |
| MNDA             | mRNA         | 182           |
| HDAC4            | mRNA         | 24            |
| TLR1             | mRNA         | 46            |
| PHF3             | mRNA         | 70            |
| GNG10            | mRNA         | 25            |
| PSCDBP           | mRNA         | 57            |
| RBM25            | mRNA         | 49            |
| DHRS8            | mRNA         | 58            |
| MAP3K2           | mRNA         | 27            |
| ARPC5            | mRNA         | 24            |
| HEBP2            | mRNA         | 23            |
| PCMTD1           | mRNA         | 128           |
| SULF2            | mRNA         | 23            |
| LRRK2            | mRNA         | 71            |
| RGS18            | mRNA         | 28            |
| DLD              | mRNA         | 40            |
| LOC644033        | mRNA         | 19            |
| PSIP1            | mRNA         | 20            |
| WSB1             | mRNA         | 17            |
| RBM7             | mRNA         | 19            |
| COX7B            | mRNA         | 18            |
| LMBRD1           | mRNA         | 19            |
| AKTIP            | mRNA         | 52            |
| PTGS2            | mRNA         | 45            |
| RGS2             | mRNA         | 70            |
| EXOSC3           | mRNA         | 22            |
| GOLPH3           | mRNA         | 28            |
| DJ341D10.1       | mRNA         | 28            |
| NT5C2            | mRNA         | 137           |
| EXOC8            | mRNA         | 47            |

|           |      |     |
|-----------|------|-----|
| BTAF1     | mRNA | 17  |
| AMN1      | mRNA | 172 |
| PPP2R3C   | mRNA | 30  |
| LOC347376 | mRNA | 13  |
| B2M       | mRNA | 21  |
| ARID4A    | mRNA | 43  |
| ACSL1     | mRNA | 19  |
| CLK4      | mRNA | 157 |
| PBEF1     | mRNA | 27  |
| CBX1      | mRNA | 26  |
| TUBA4A    | mRNA | 10  |
| TXNL5     | mRNA | 19  |
| MGEA5     | mRNA | 25  |
| RCSD1     | mRNA | 160 |
| LOC646064 | mRNA | 16  |
| C12ORF35  | mRNA | 28  |
| LOC647361 | mRNA | 3   |
| RPS29     | mRNA | 2   |
| MAP4K4    | mRNA | 38  |
| USP15     | mRNA | 145 |
| NT5C3     | mRNA | 20  |
| CDC123    | mRNA | 12  |
| ZYG11B    | mRNA | 14  |
| SLC36A4   | mRNA | 17  |
| PYGL      | mRNA | 82  |
| IFNGR1    | mRNA | 28  |
| S100A12   | mRNA | 17  |
| LOC650919 | mRNA | 16  |
| LOC644969 | mRNA | 12  |
| ADD3      | mRNA | 19  |
| TRIM56    | mRNA | 20  |
| LOC388789 | mRNA | 12  |
| ZMYM2     | mRNA | 68  |
| LMNB1     | mRNA | 18  |
| LY96      | mRNA | 14  |
| C10ORF119 | mRNA | 13  |
| FLJ11151  | mRNA | 10  |
| SRGN      | mRNA | 28  |
| PSG11     | mRNA | 11  |
| SF3B14    | mRNA | 13  |
| LOC552891 | mRNA | 9   |
| NCF2      | mRNA | 74  |
| RFFL      | mRNA | 56  |
| ABCC5     | mRNA | 14  |
| SAP30     | mRNA | 15  |
| LOC730740 | mRNA | 9   |
| TMBIM4    | mRNA | 165 |
| F2RL1     | mRNA | 23  |

|           |      |    |
|-----------|------|----|
| NOV       | mRNA | 21 |
| IFRD1     | mRNA | 30 |
| PPP1R3D   | mRNA | 66 |
| CXCL1     | mRNA | 13 |
| IL8RB     | mRNA | 22 |
| C7ORF25   | mRNA | 15 |
| MLX       | mRNA | 7  |
| UNC119    | mRNA | 13 |
| RPL23     | mRNA | 7  |
| HAL       | mRNA | 17 |
| THRAP2    | mRNA | 8  |
| ENSA      | mRNA | 9  |
| GPR177    | mRNA | 6  |
| CHD7      | mRNA | 59 |
| ZNF354A   | mRNA | 18 |
| SUMO1P1   | mRNA | 23 |
| RPS6KA5   | mRNA | 18 |
| HIF1A     | mRNA | 21 |
| IBRDC2    | mRNA | 11 |
| KIAA0319  | mRNA | 11 |
| LMTK2     | mRNA | 12 |
| LOC652578 | mRNA | 22 |
| LOC644964 | mRNA | 7  |
| LOC653604 | mRNA | 8  |
| RAE1      | mRNA | 13 |
| GMFG      | mRNA | 10 |
| C20ORF43  | mRNA | 90 |
| FLJ20152  | mRNA | 16 |
| OSBPL9    | mRNA | 16 |
| TMEM154   | mRNA | 14 |
| RNF130    | mRNA | 7  |
| ASB8      | mRNA | 15 |
| TNFSF13B  | mRNA | 11 |
| PSG9      | mRNA | 5  |
| GADD45A   | mRNA | 10 |
| GTF2IP1   | mRNA | 14 |
| ZNF585A   | mRNA | 9  |
| TMCC3     | mRNA | 18 |
| FLJ31951  | mRNA | 13 |
| OGFRL1    | mRNA | 11 |
| ANP32A    | mRNA | 12 |
| RAB35     | mRNA | 13 |
| FCGR3B    | mRNA | 17 |
| VNN2      | mRNA | 16 |
| ABAT      | mRNA | 8  |
| LOC645895 | mRNA | 5  |
| CYP4F3    | mRNA | 17 |
| NUDT16P   | mRNA | 14 |

|           |      |    |
|-----------|------|----|
| GADD45G   | mRNA | 7  |
| KIAA0492  | mRNA | 5  |
| RBMXL1    | mRNA | 8  |
| FADD      | mRNA | 14 |
| TM6SF1    | mRNA | 18 |
| TLE4      | mRNA | 18 |
| SRPK1     | mRNA | 14 |
| HECW2     | mRNA | 17 |
| MBOAT1    | mRNA | 11 |
| RPS6KA3   | mRNA | 9  |
| EVI2B     | mRNA | 14 |
| LOC643284 | mRNA | 3  |
| TACC3     | mRNA | 7  |
| NFKBIA    | mRNA | 9  |
| MPPE1     | mRNA | 7  |
| CLCC1     | mRNA | 10 |
| TRIM25    | mRNA | 8  |
| PICALM    | mRNA | 12 |
| HLX1      | mRNA | 10 |
| PSMB9     | mRNA | 8  |
| ACP6      | mRNA | 6  |
| DHRS12    | mRNA | 10 |
| BIN3      | mRNA | 7  |
| TLR2      | mRNA | 12 |
| PBX2      | mRNA | 3  |
| GPR160    | mRNA | 14 |
| LOC440093 | mRNA | 6  |
| SLCO4C1   | mRNA | 10 |
| LOC402176 | mRNA | 8  |
| HSD17B12  | mRNA | 3  |
| LOC440926 | mRNA | 7  |
| TAP2      | mRNA | 9  |
| FBXL13    | mRNA | 11 |
| TXN       | mRNA | 9  |
| CUGBP2    | mRNA | 12 |
| SH3BP5L   | mRNA | 2  |
| SIRPB1    | mRNA | 10 |
| MXD1      | mRNA | 13 |
| ARSG      | mRNA | 5  |
| ALOX5AP   | mRNA | 3  |
| C9ORF19   | mRNA | 5  |
| ARID3A    | mRNA | 10 |
| EPC1      | mRNA | 7  |
| C9ORF95   | mRNA | 5  |
| RBP7      | mRNA | 5  |
| ZNF281    | mRNA | 3  |
| SLC5A9    | mRNA | 3  |
| S100A9    | mRNA | 7  |

|           |      |    |
|-----------|------|----|
| LOC653505 | mRNA | 1  |
| IRS2      | mRNA | 10 |
| ANKRD44   | mRNA | 1  |
| C19ORF40  | mRNA | 1  |
| MME       | mRNA | 5  |
| CKLF      | mRNA | 4  |
| LOC646424 | mRNA | 6  |
| HK2       | mRNA | 7  |
| JDP2      | mRNA | 4  |
| PPARBP    | mRNA | 2  |
| CACNA1E   | mRNA | 5  |
| LOC283152 | mRNA | 2  |
| THBS1     | mRNA | 2  |
| KIAA1706  | mRNA | 4  |
| BCKDK     | mRNA | 1  |
| S100A8    | mRNA | 1  |
| TNFRSF12A | mRNA | 1  |
| PTPRN2    | mRNA | 1  |
| CMTM2     | mRNA | 4  |
| KLF6      | mRNA | 4  |
| ABTB1     | mRNA | 2  |
| CDH2      | mRNA | 2  |
| RPS28     | mRNA | 1  |
| GOLGA2    | mRNA | 4  |
| CRISPLD2  | mRNA | 1  |
| RPL32     | mRNA | 1  |
| EIF2AK2   | mRNA | 2  |
| CAMK1D    | mRNA | 1  |
| RAB3GAP1  | mRNA | 1  |
| ANKRD55   | mRNA | 2  |
| RPS27     | mRNA | 1  |
| PFN2      | mRNA | 1  |
| FLJ14107  | mRNA | 1  |
| ADCK4     | mRNA | 1  |
| LPPR2     | mRNA | 1  |
| TNNI2     | mRNA | 1  |
| CLEC4E    | mRNA | 1  |
